# Supplementary material for: Discovery and systematic characterization of risk variants and genes for coronary artery disease in over a million participants
Source: PubMed Central journal article supplement (PMC9729111; doi:10.1038/s41588-022-01233-6), 2022-12-06

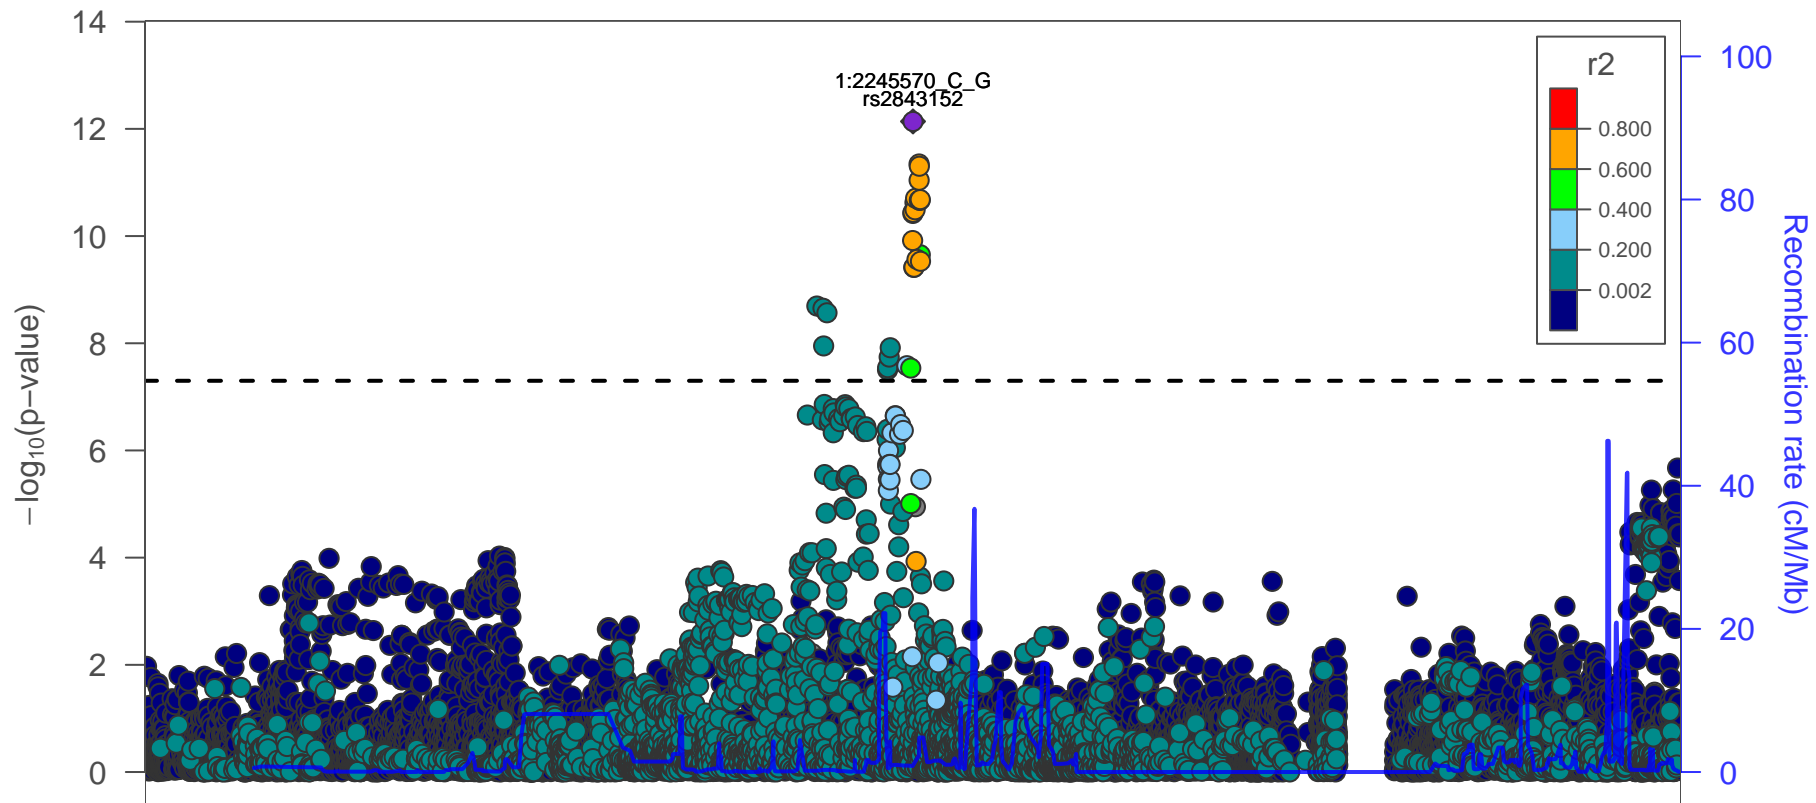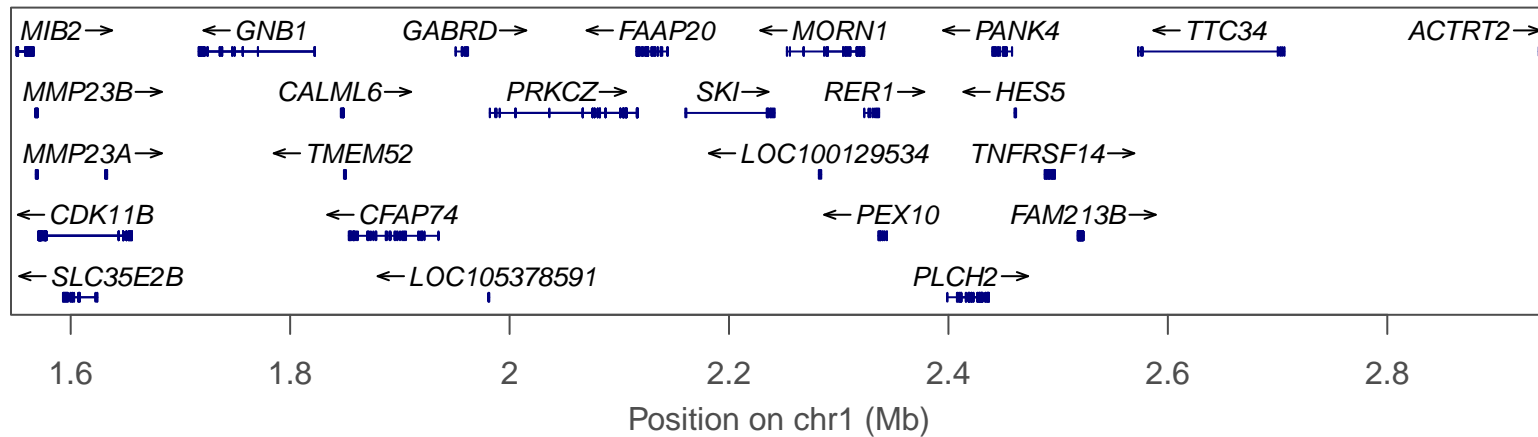

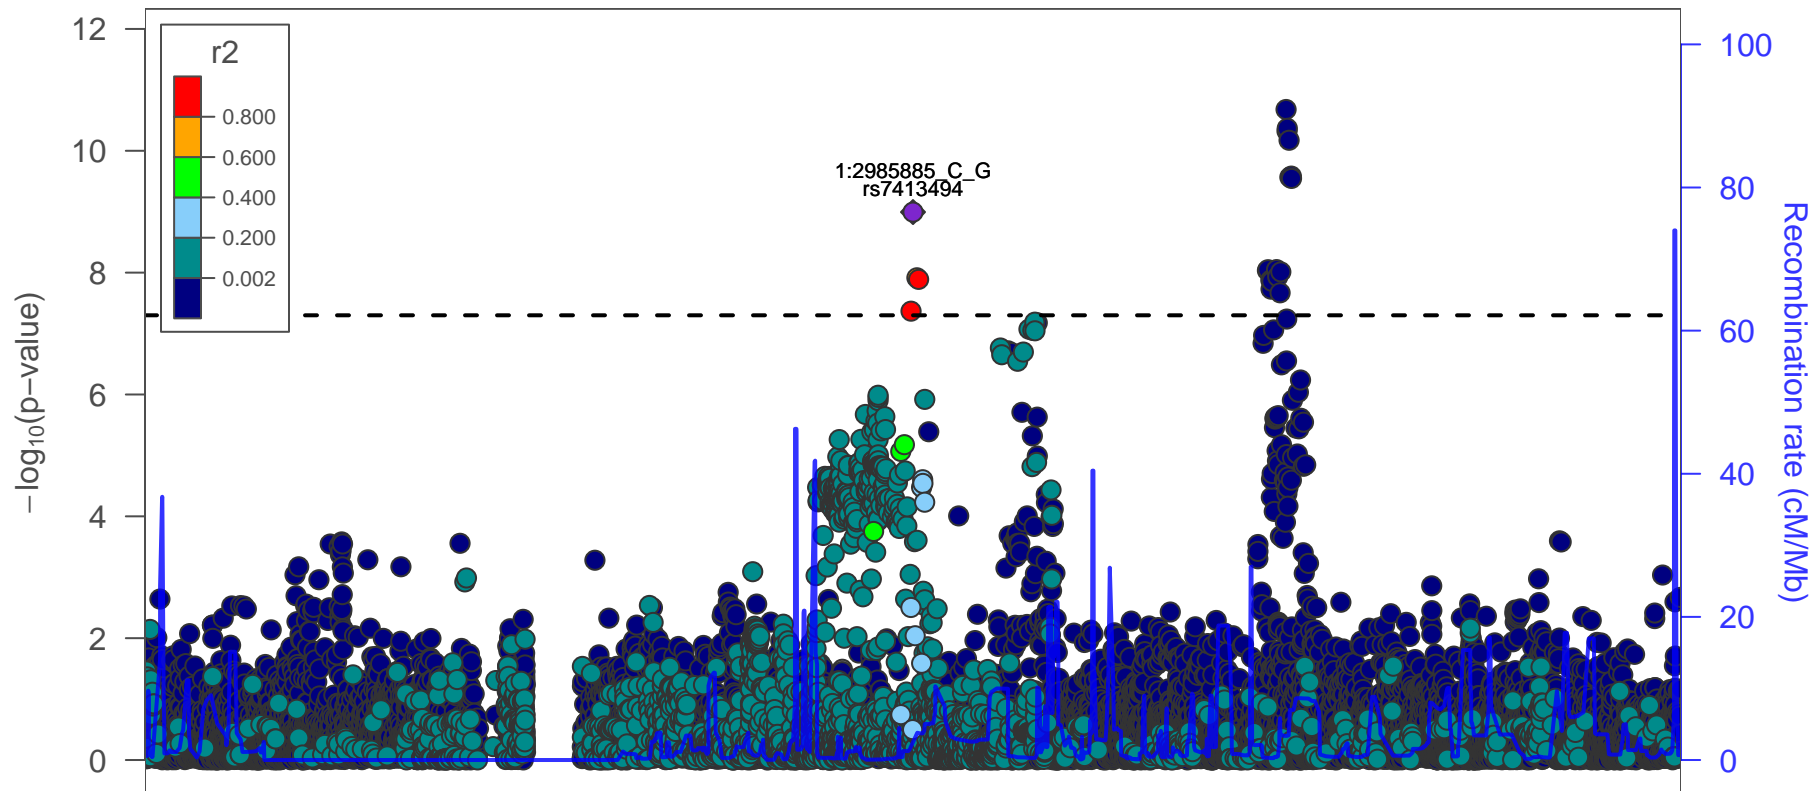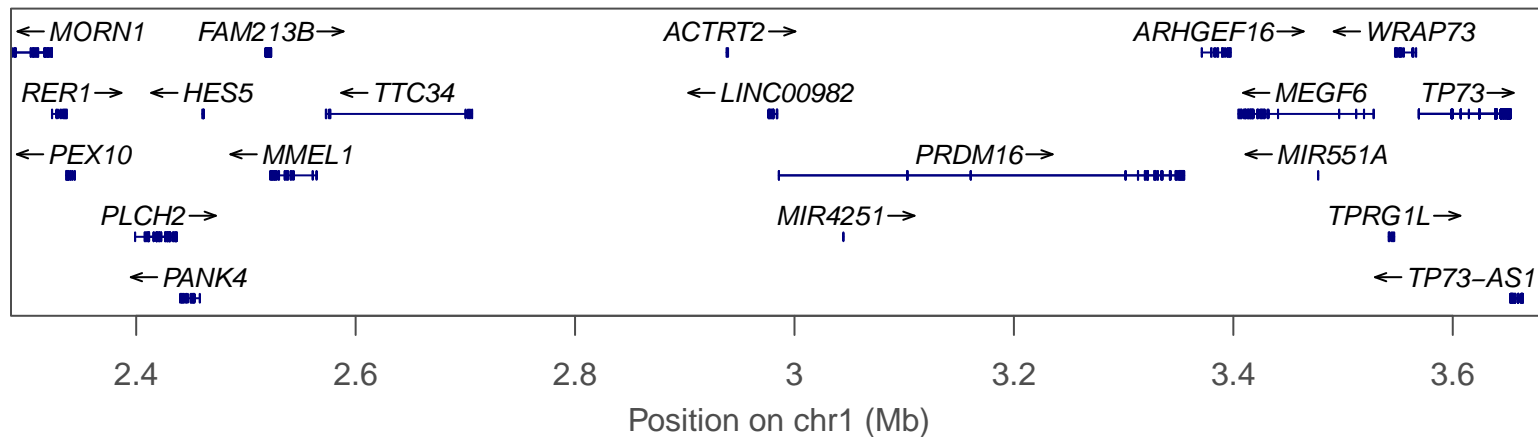

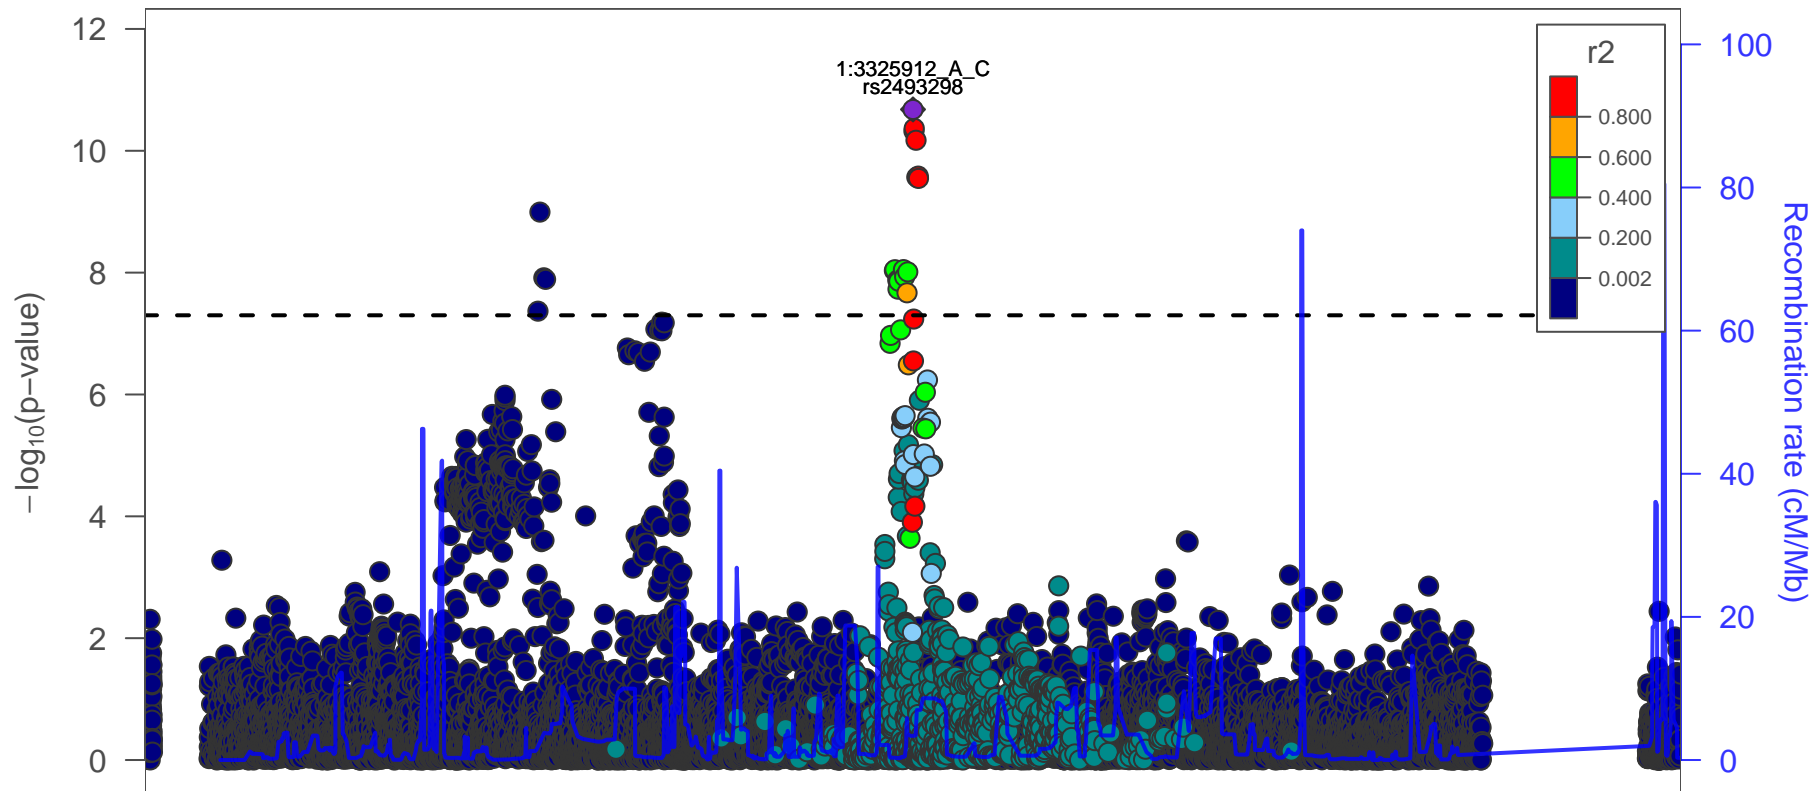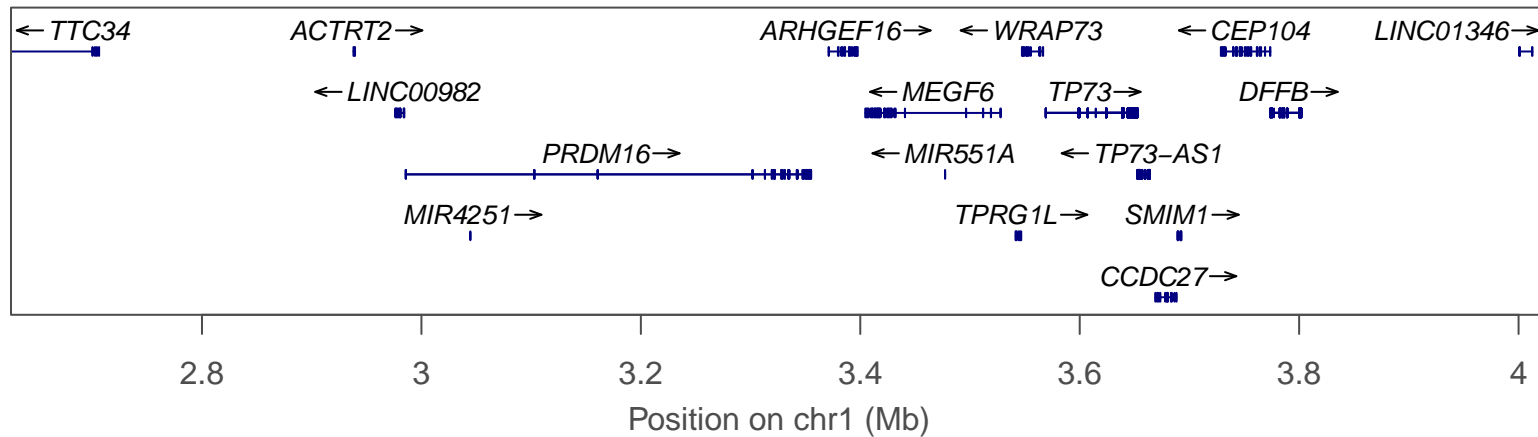

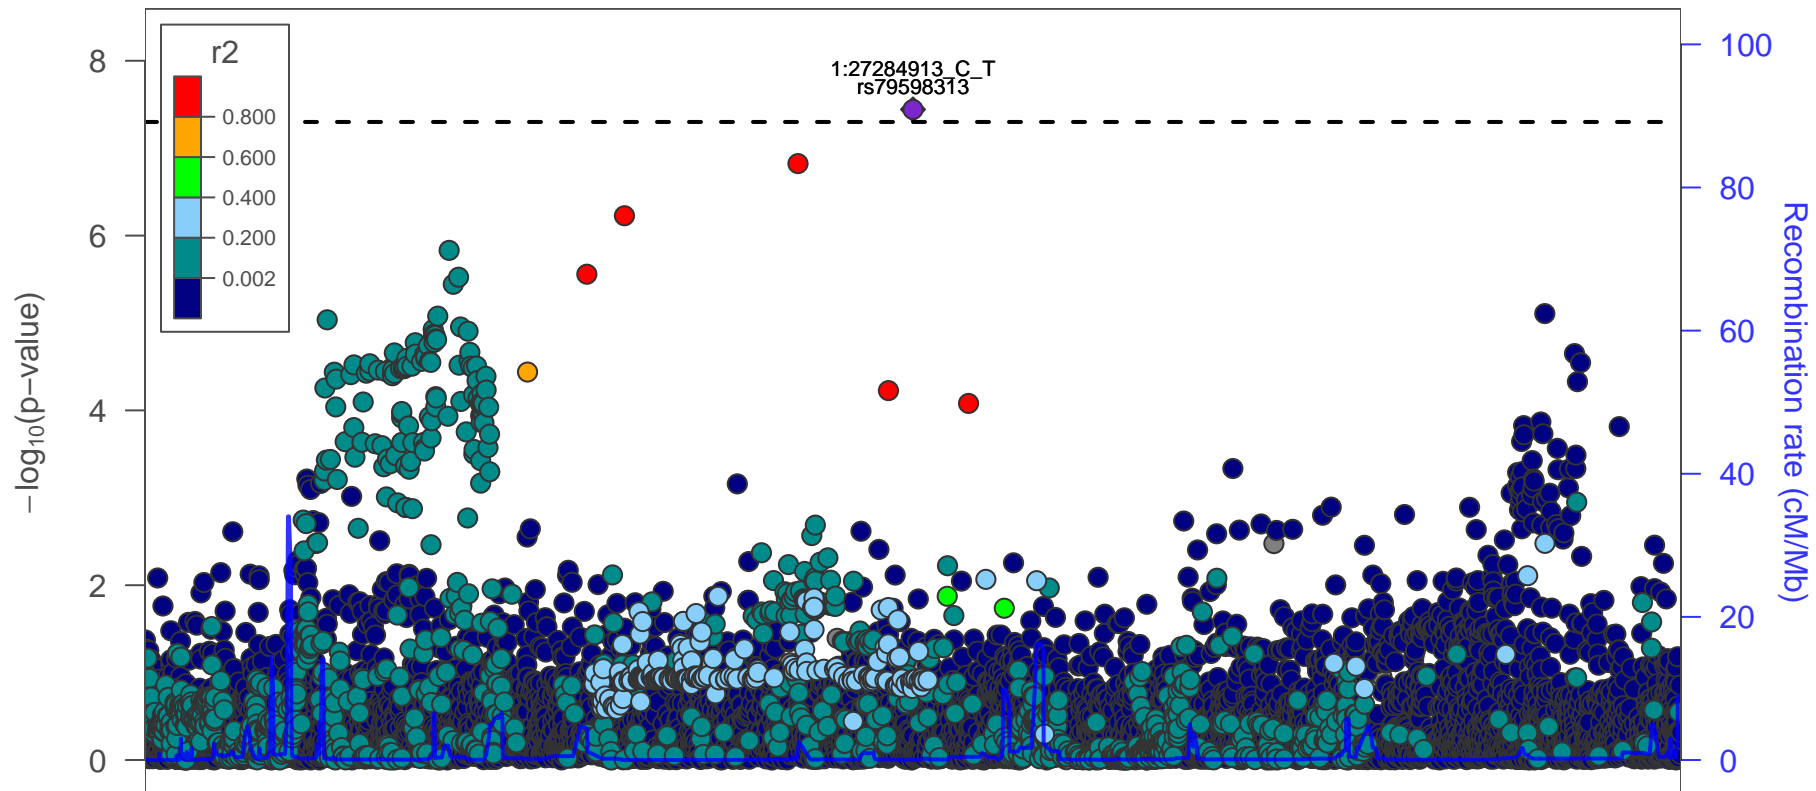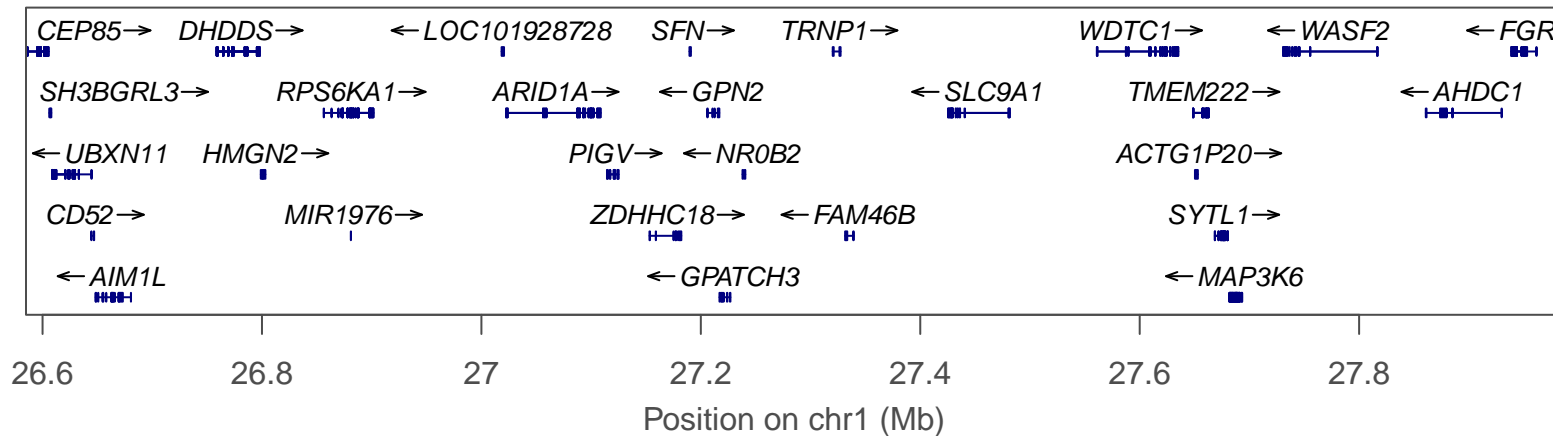

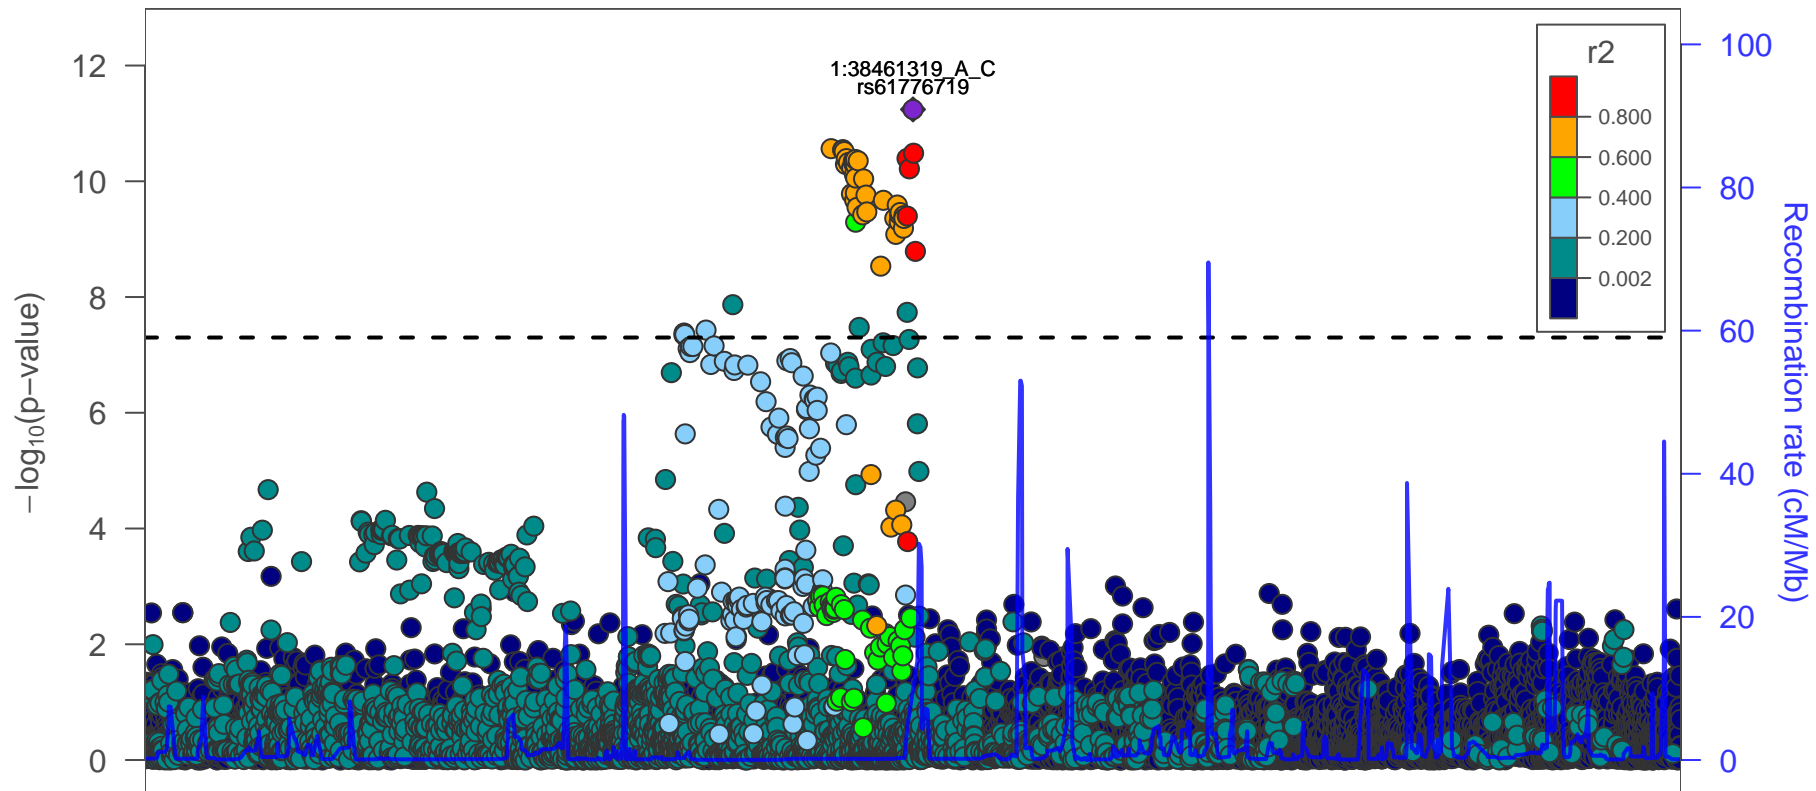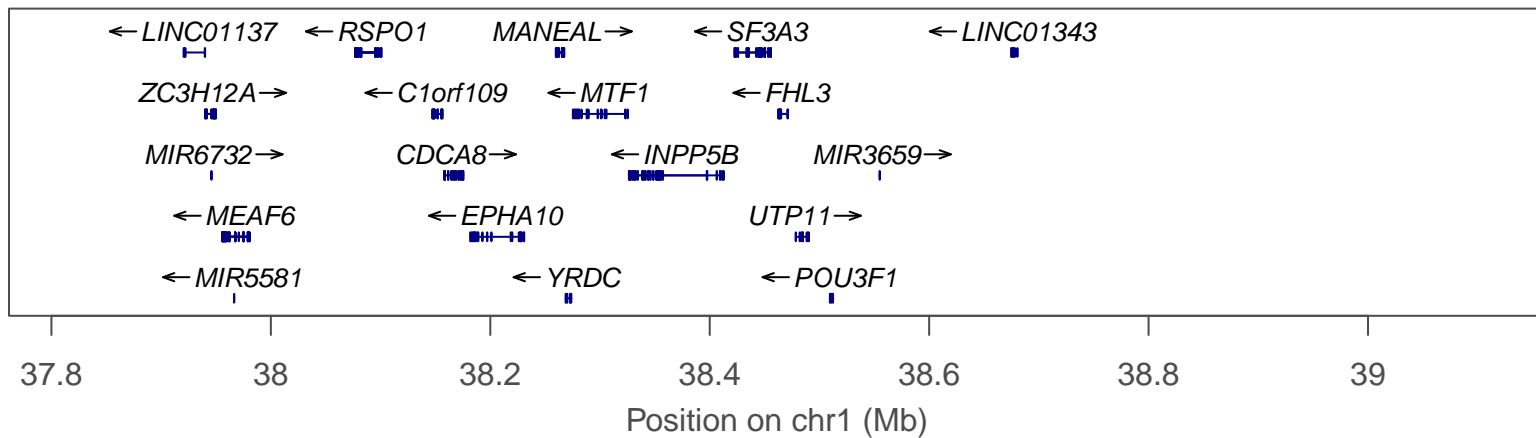

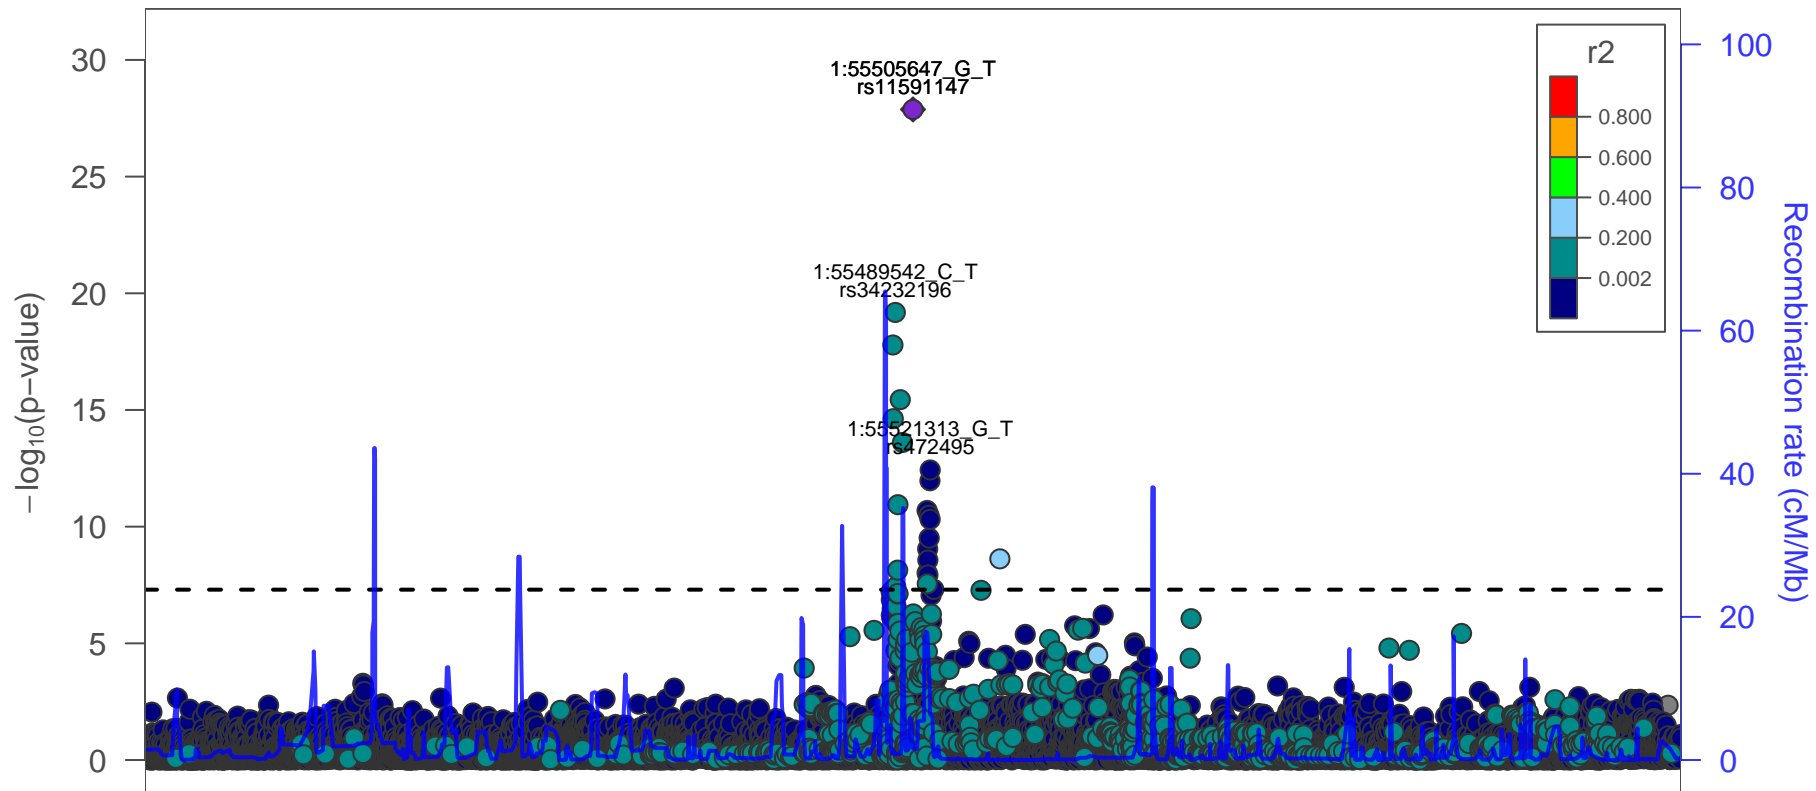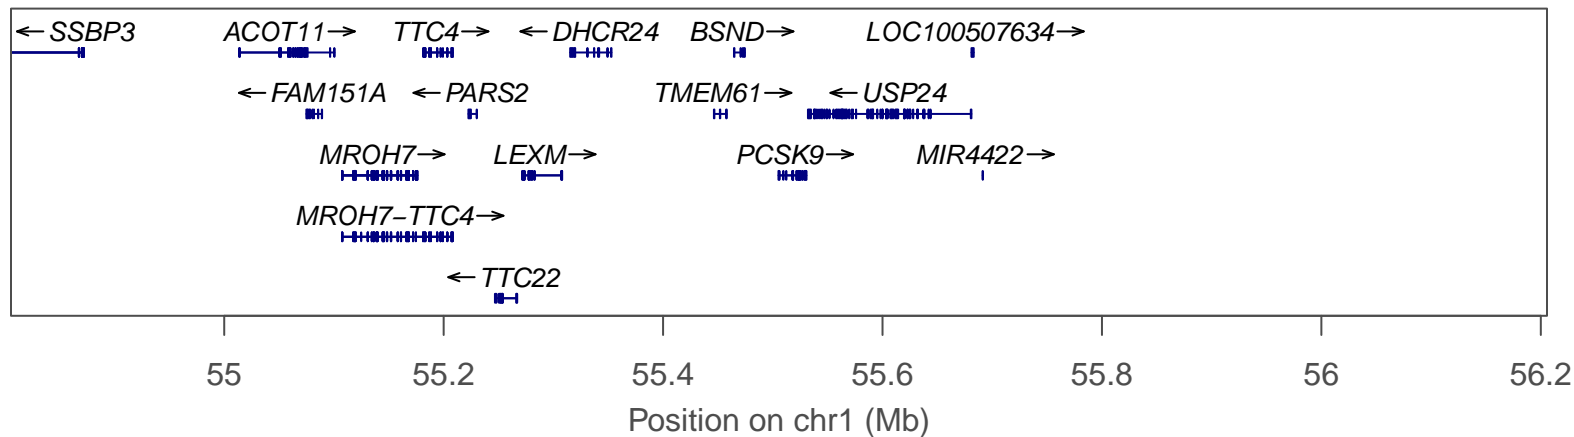

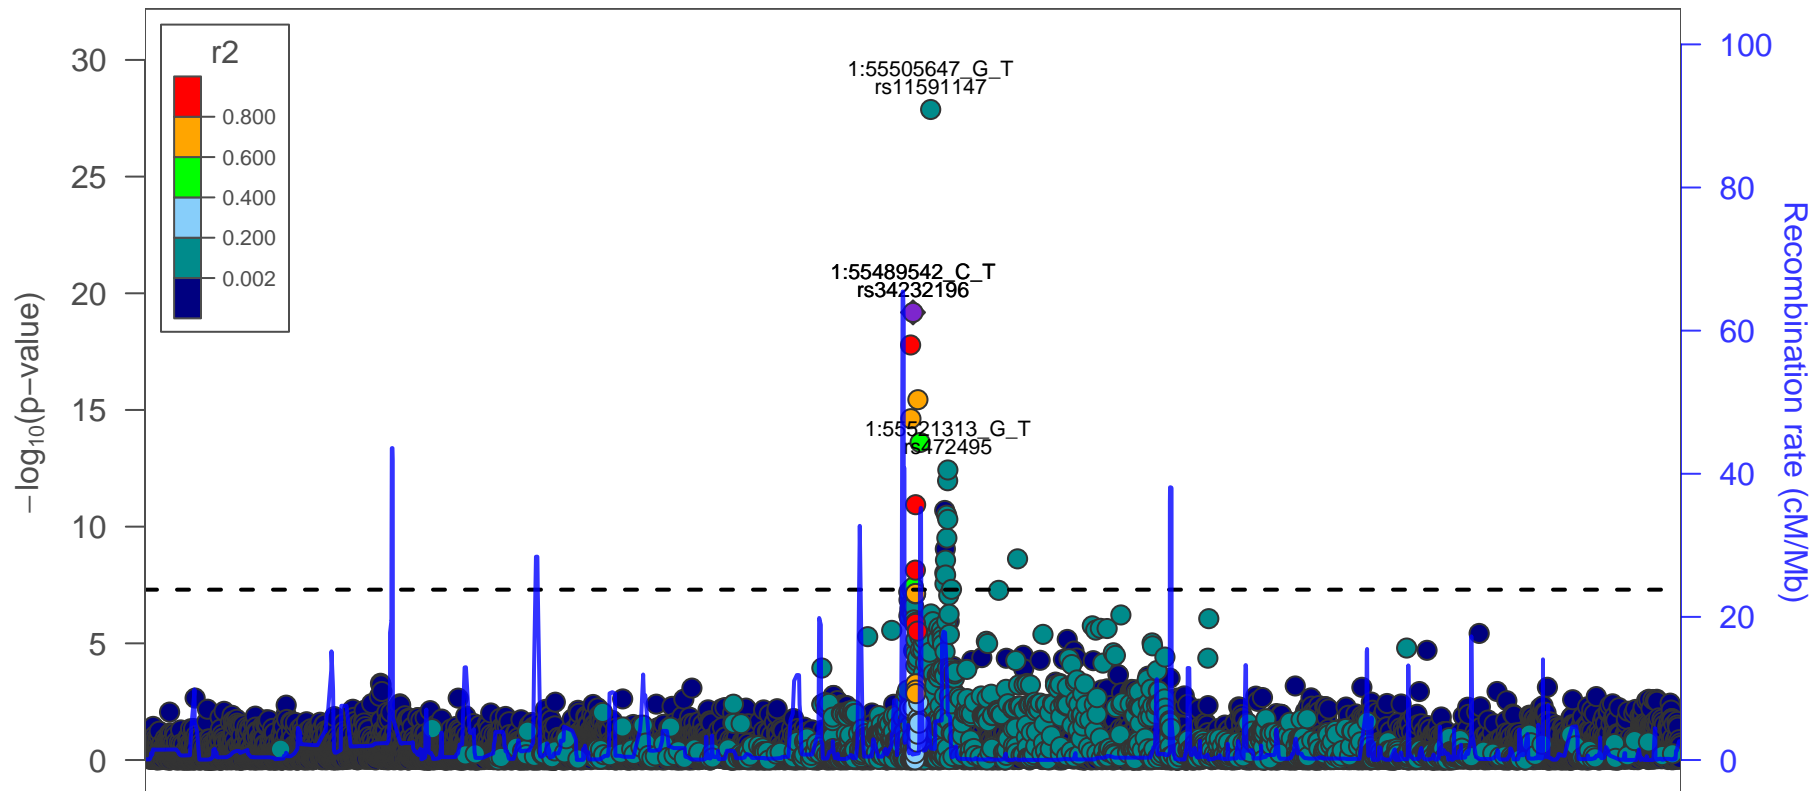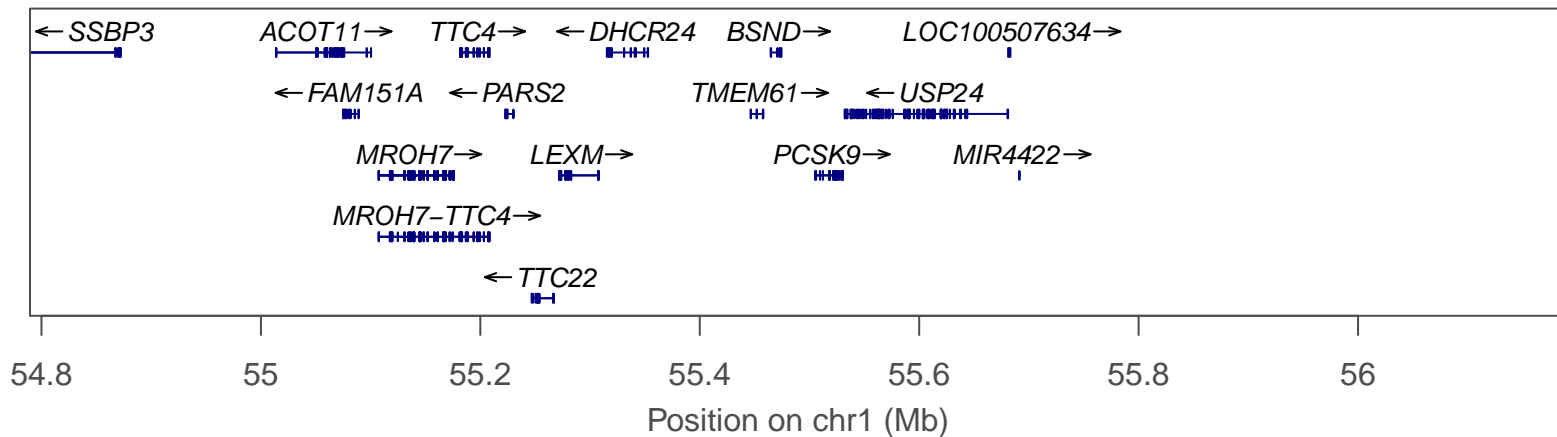

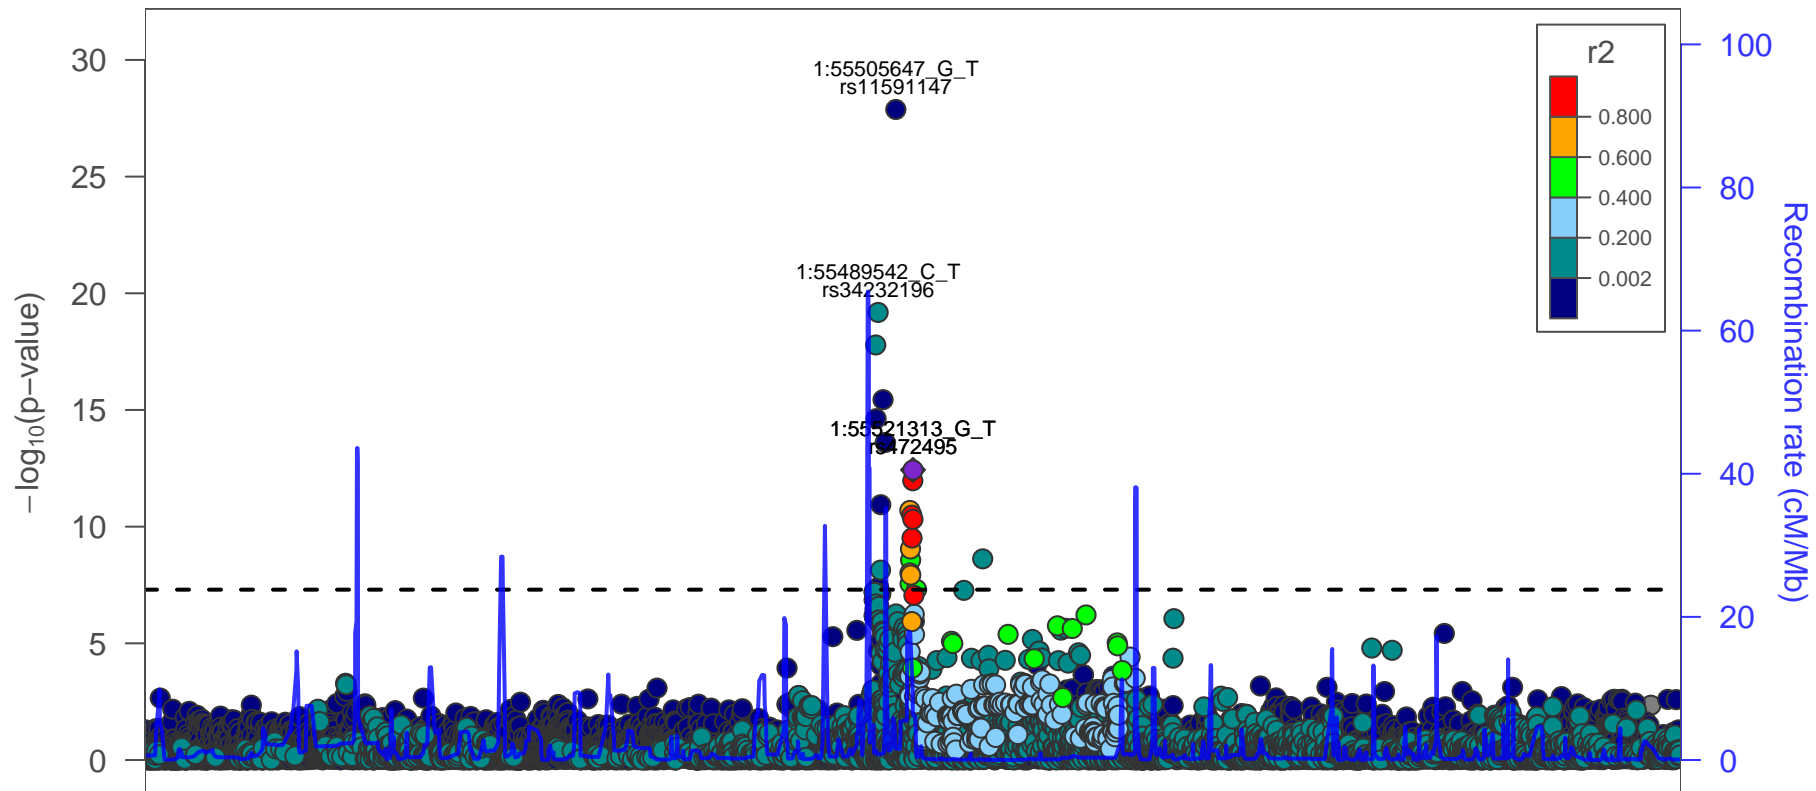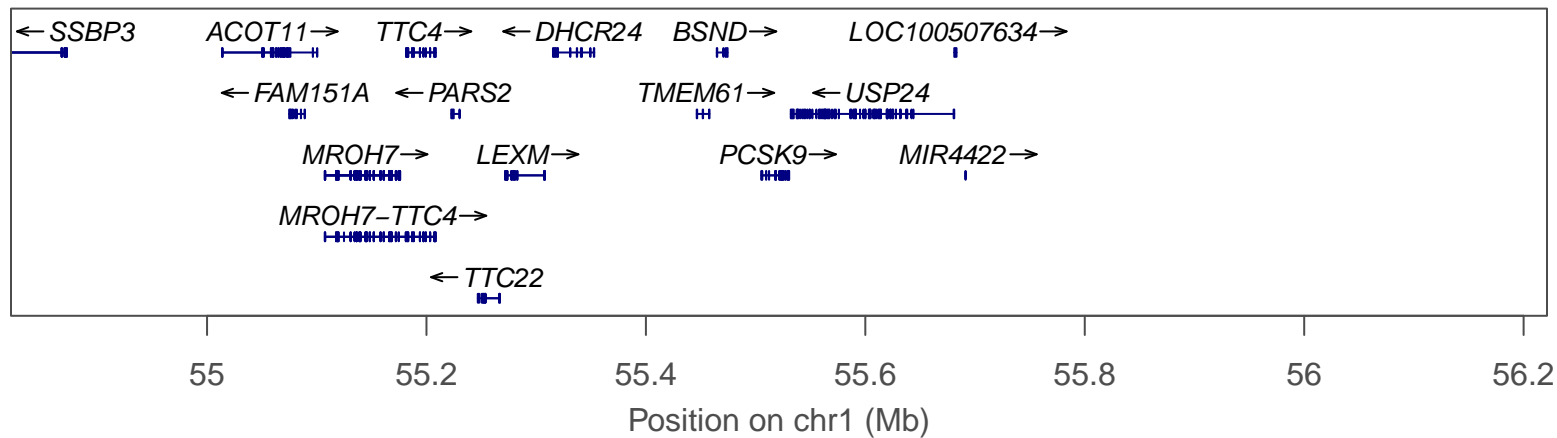



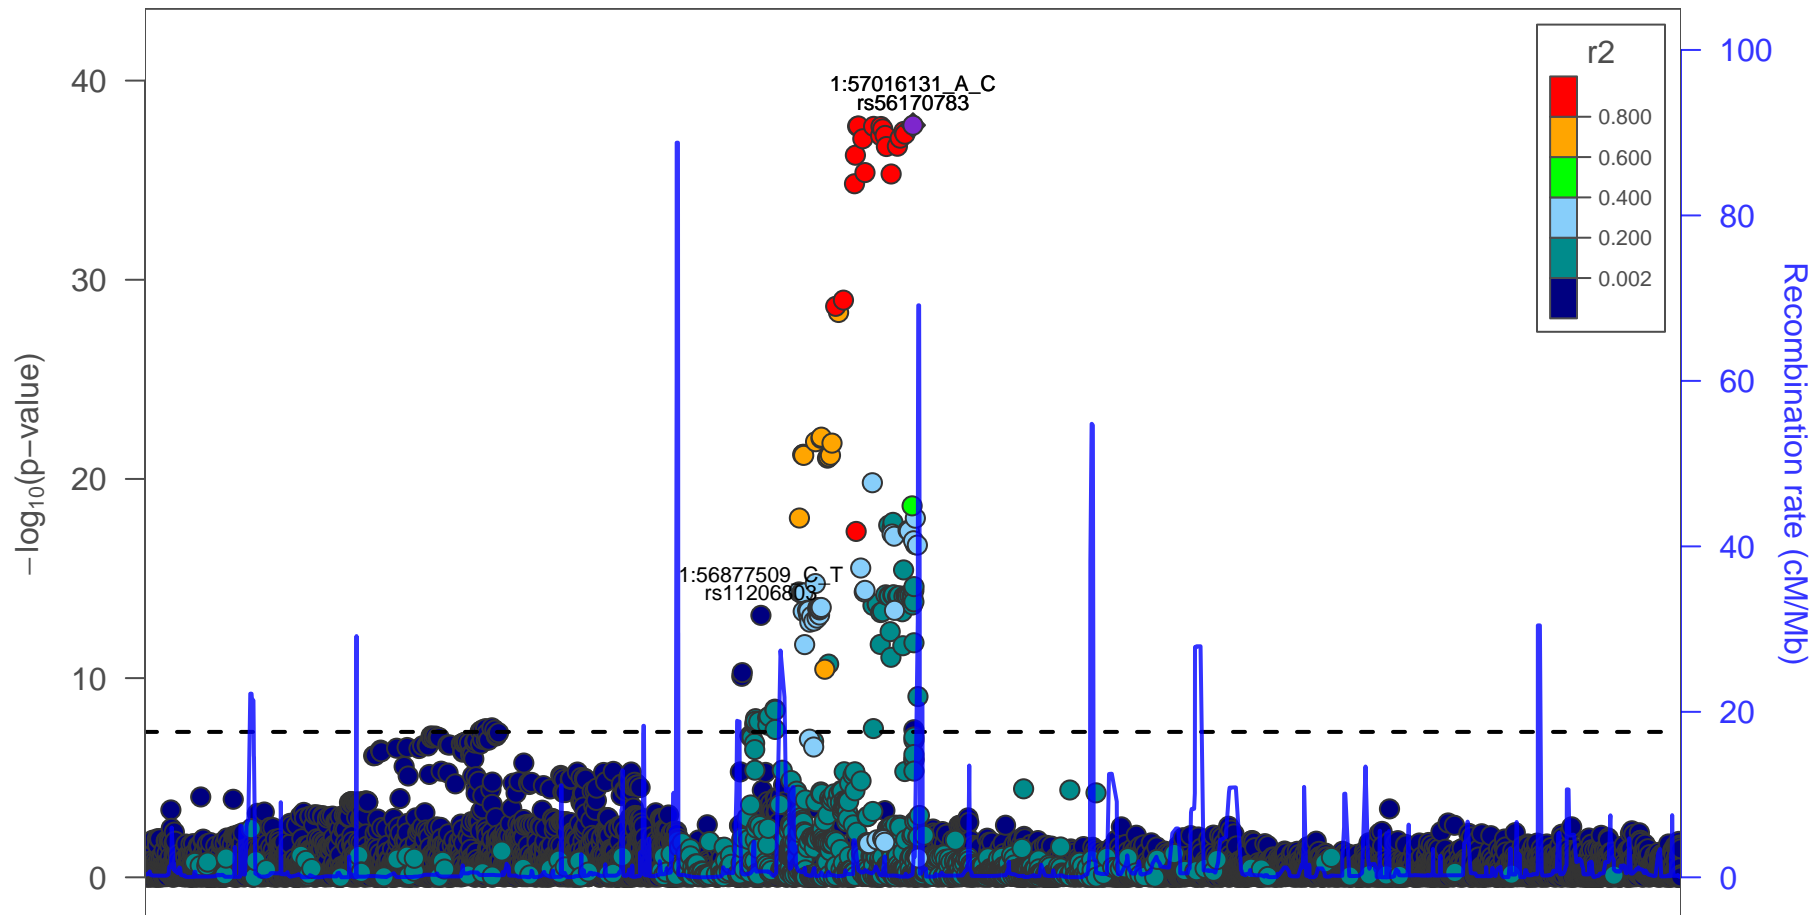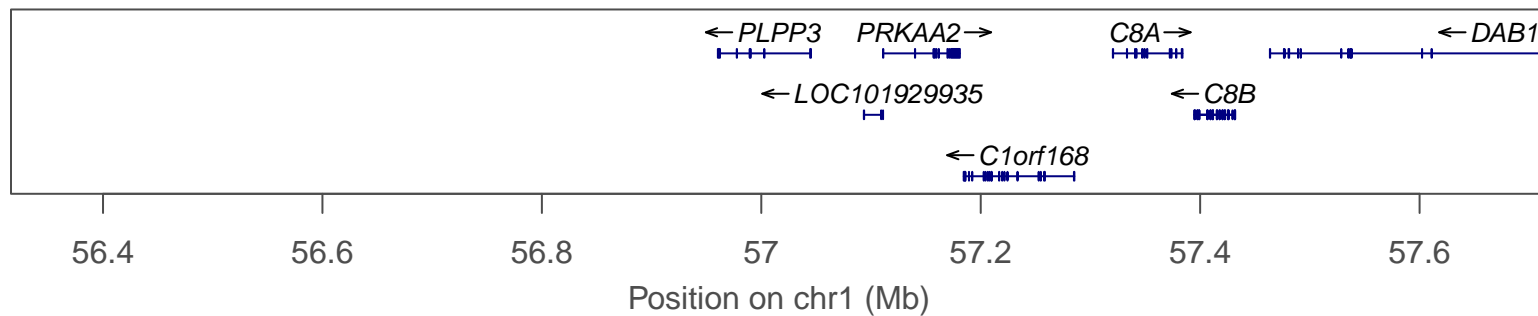

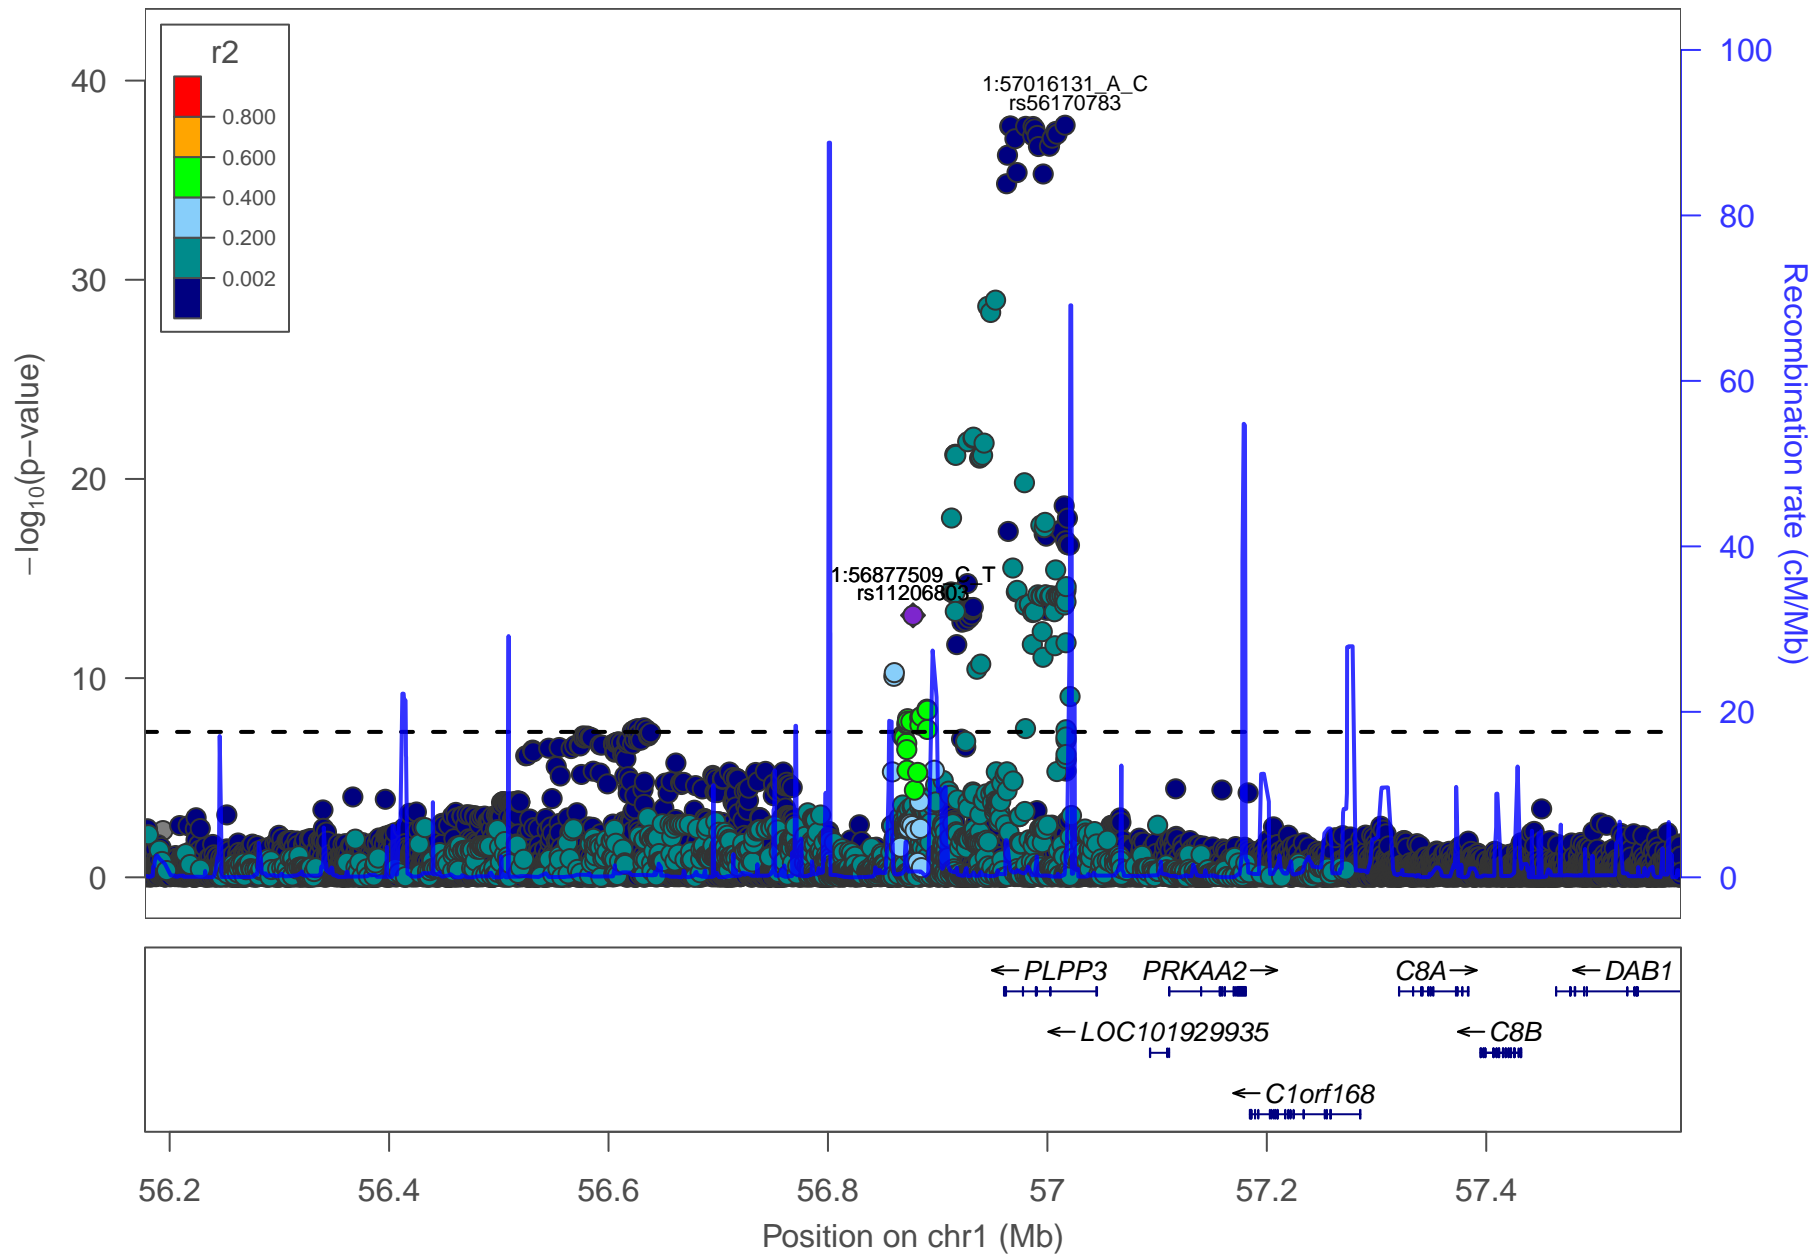

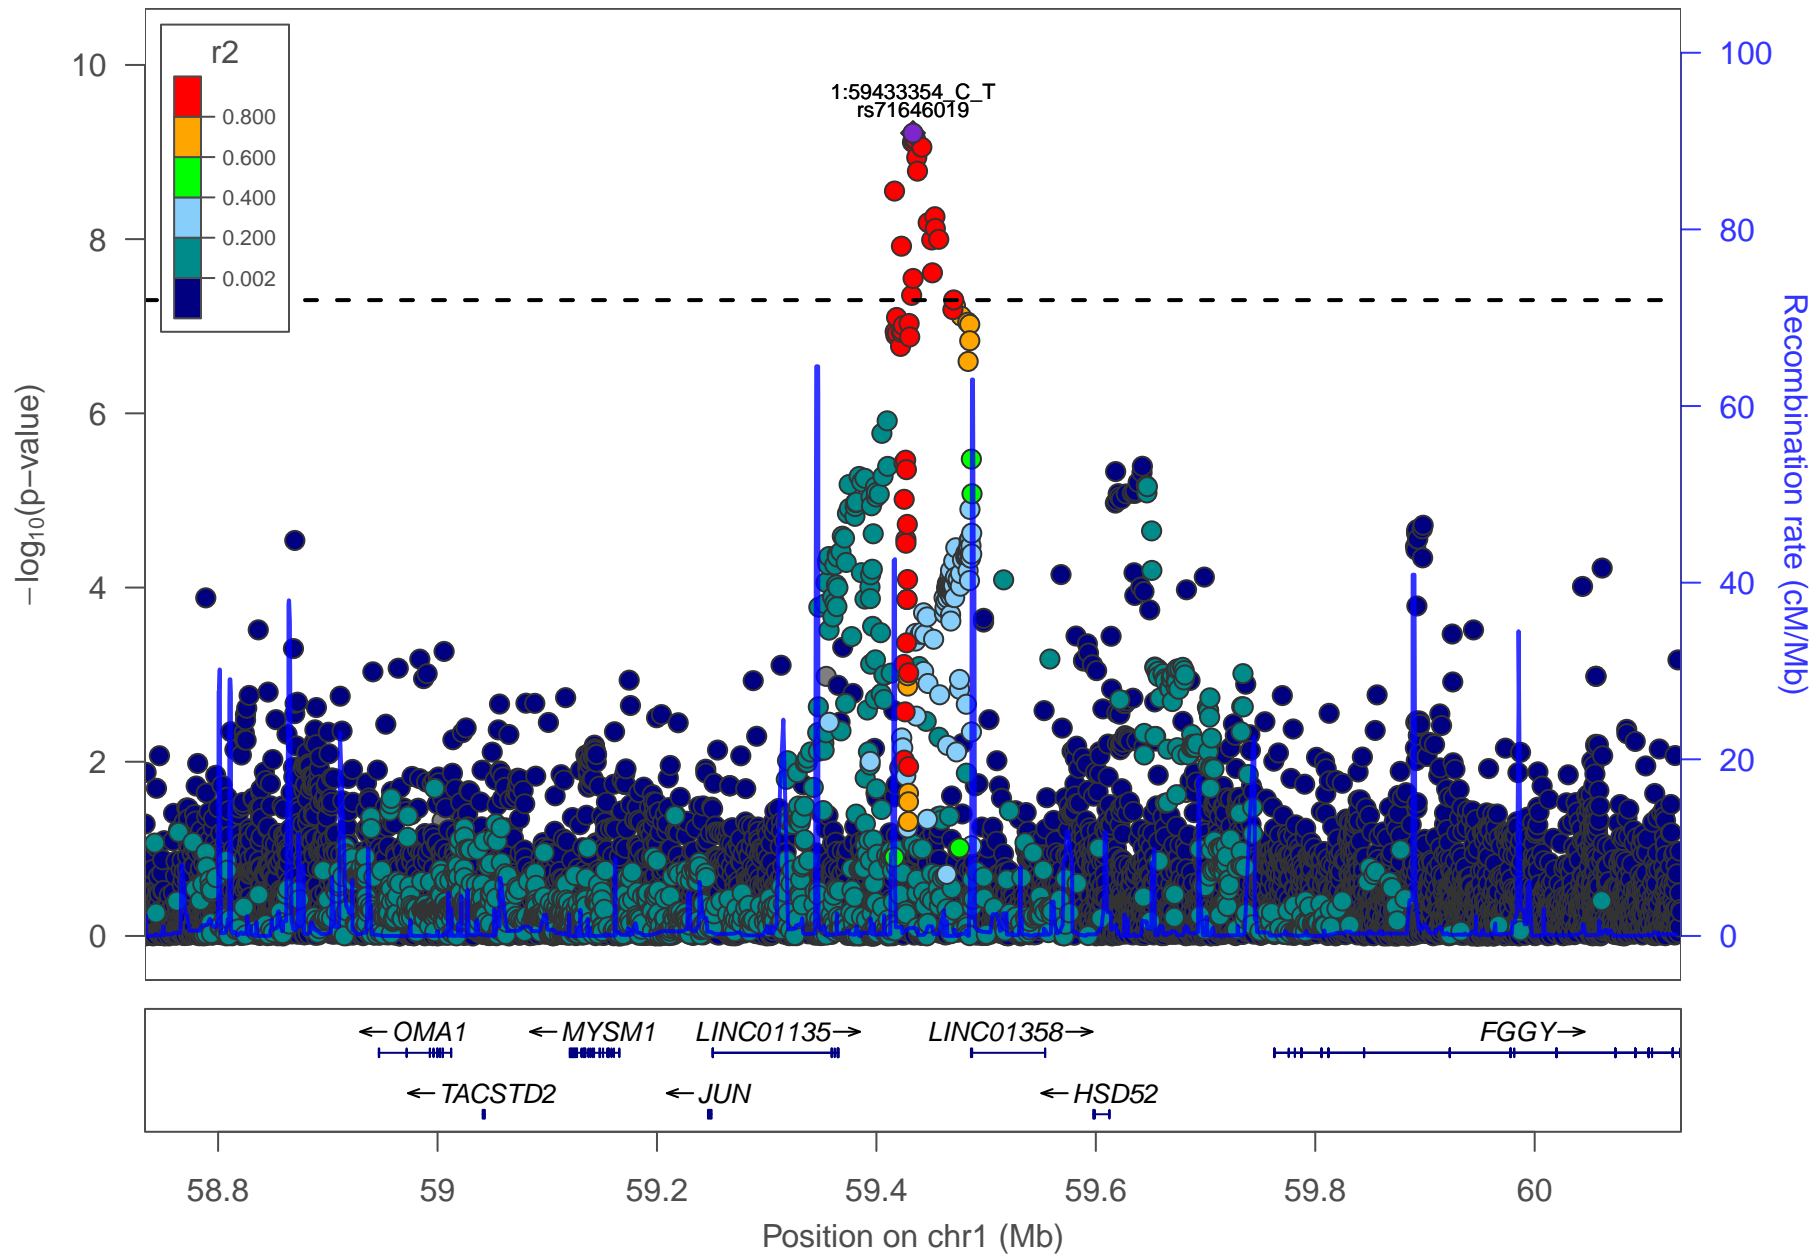

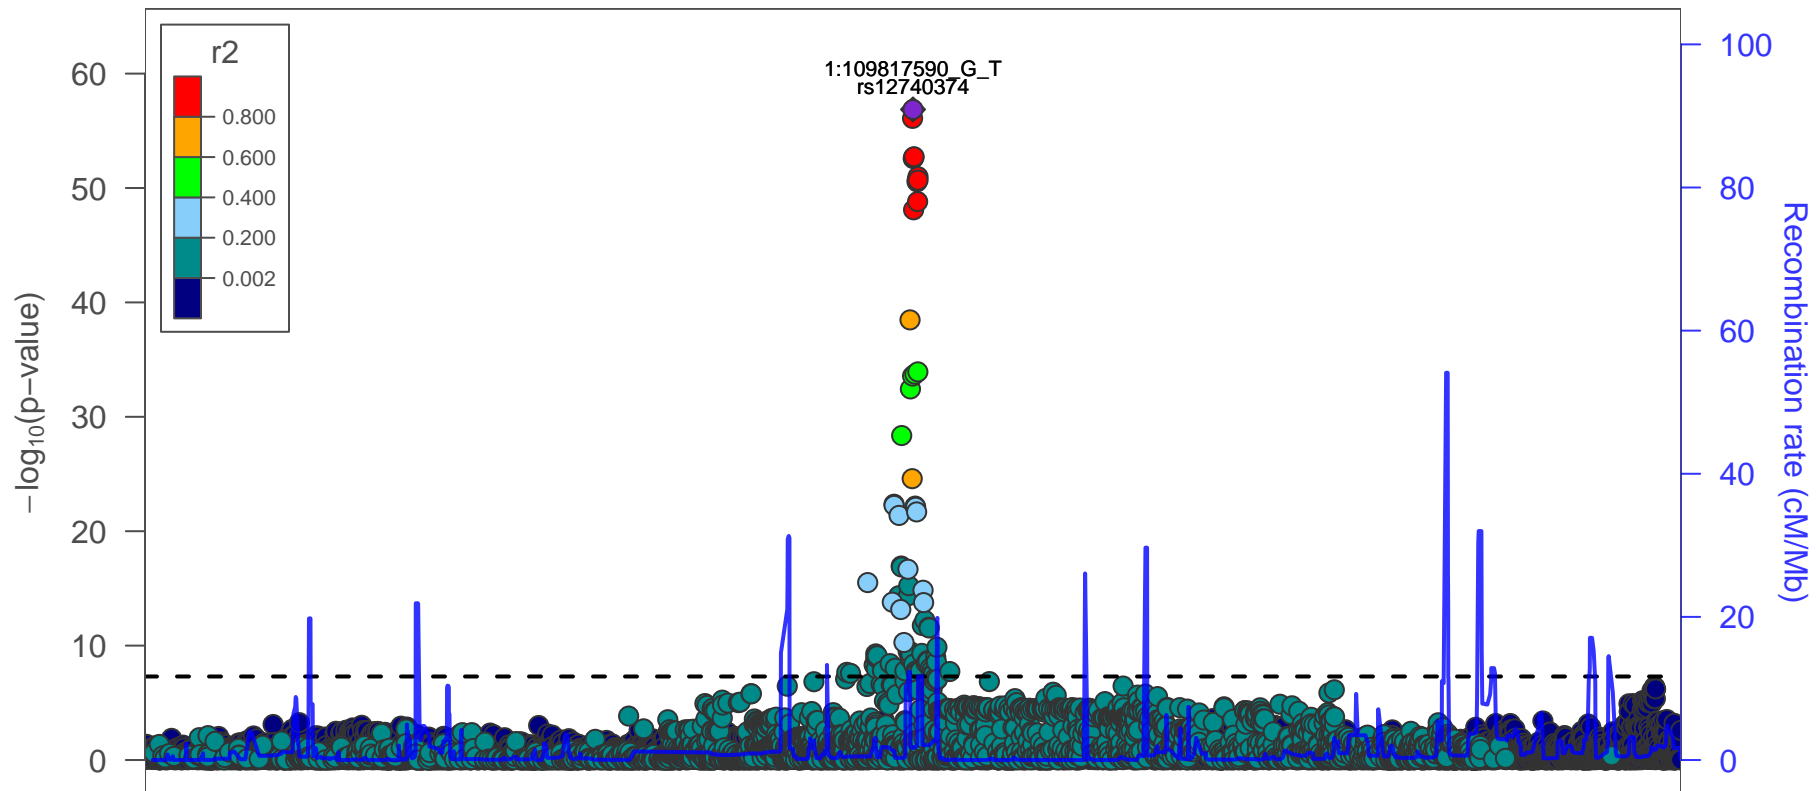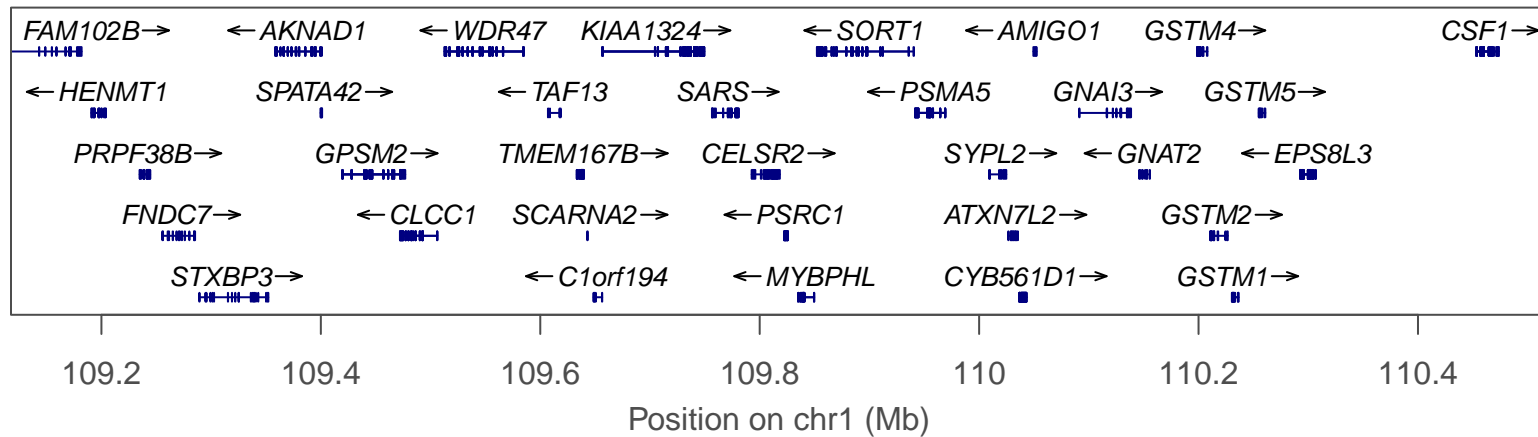

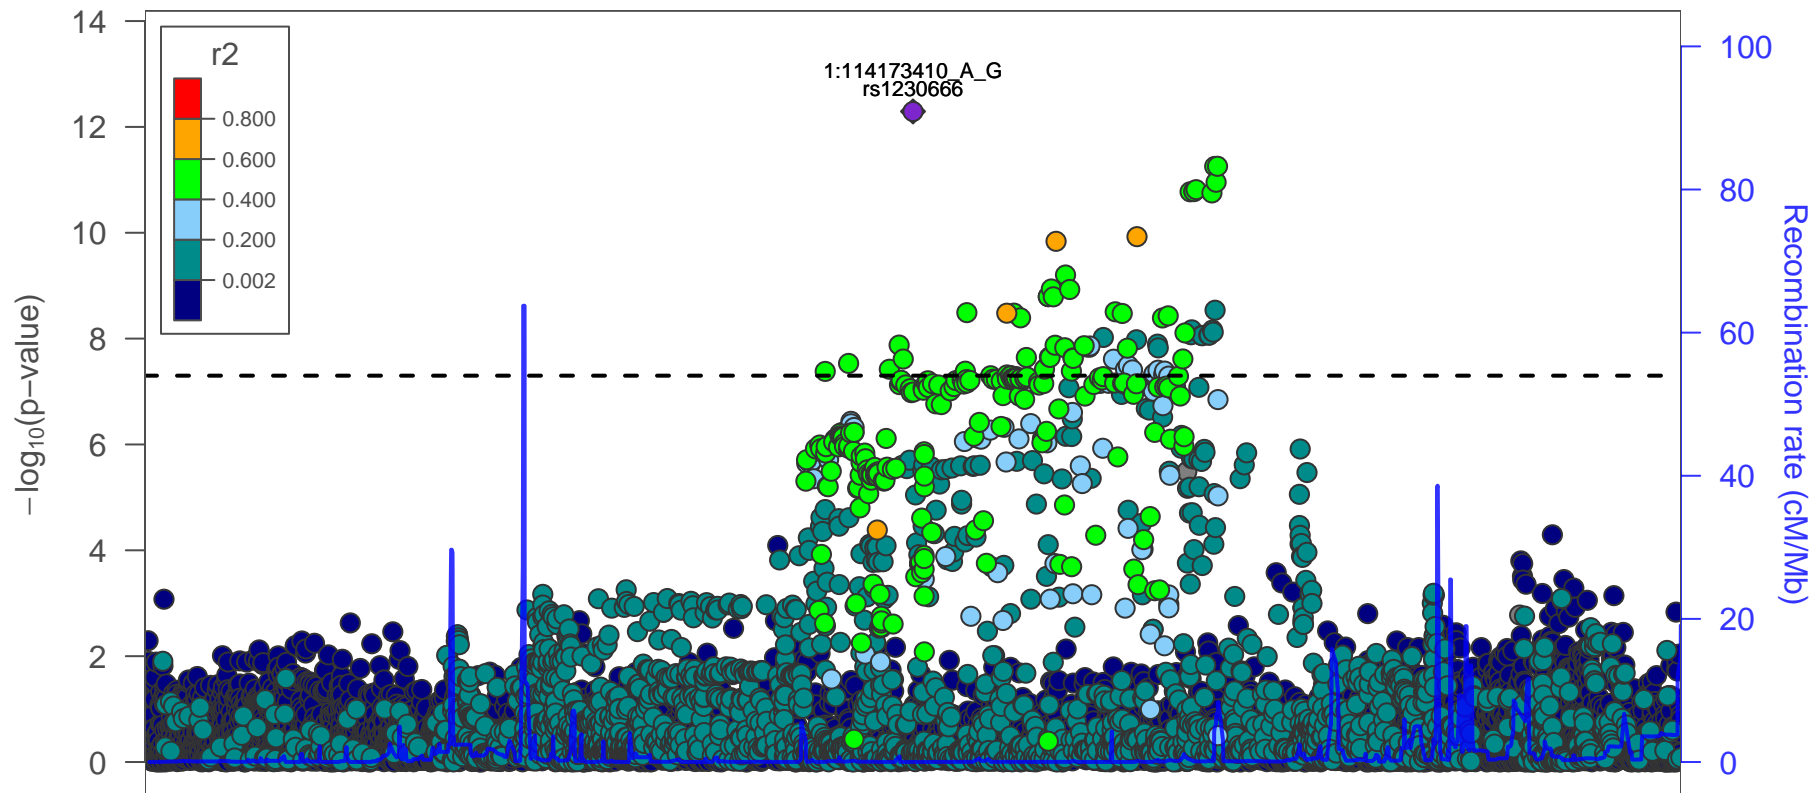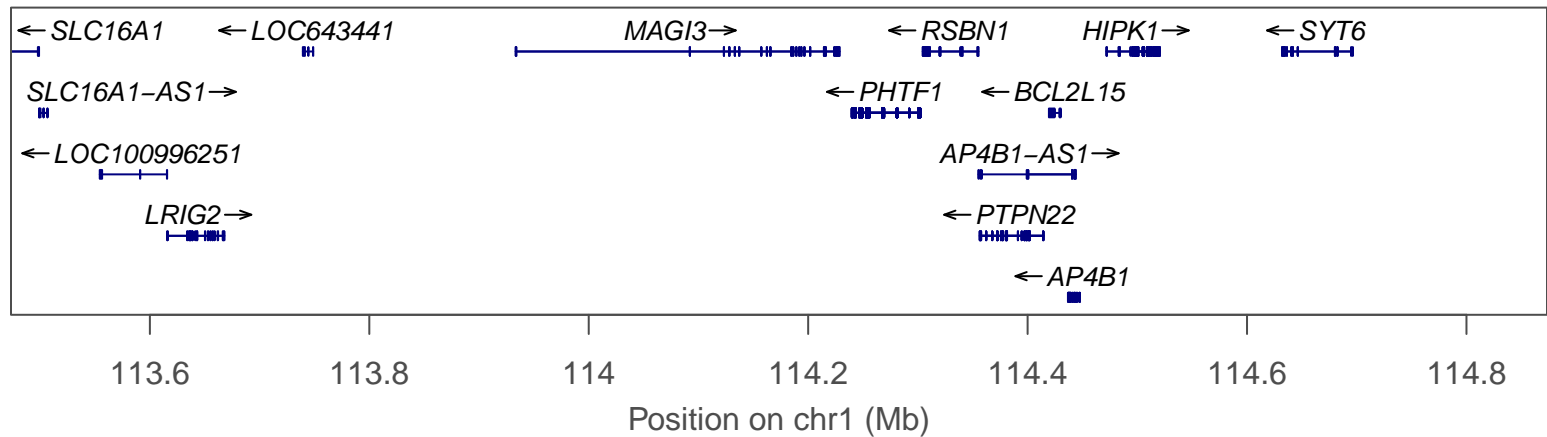

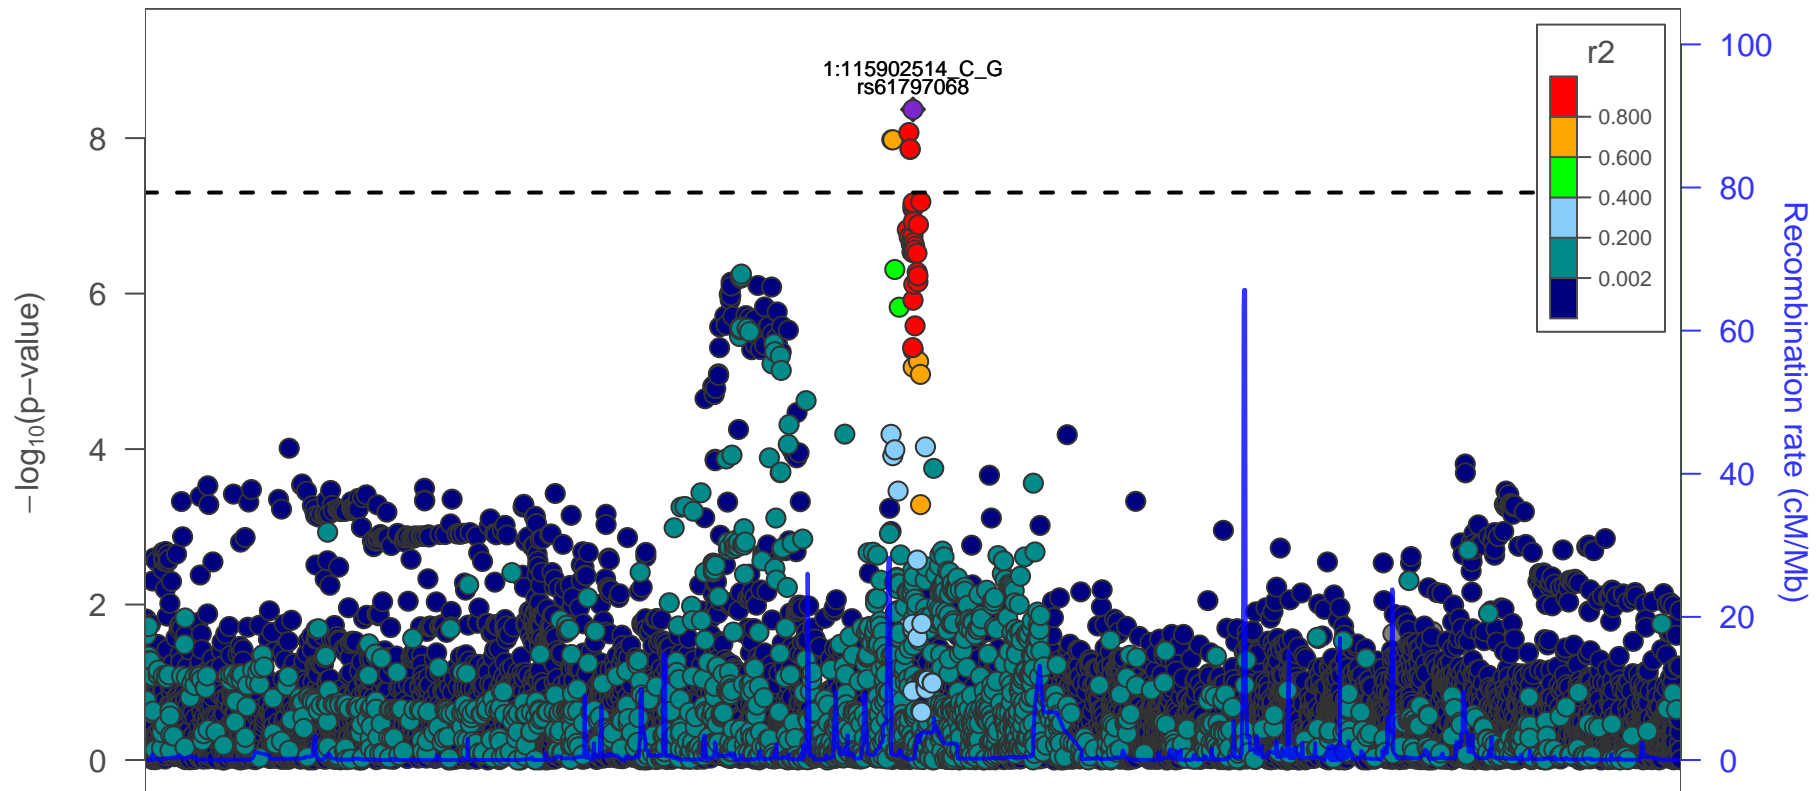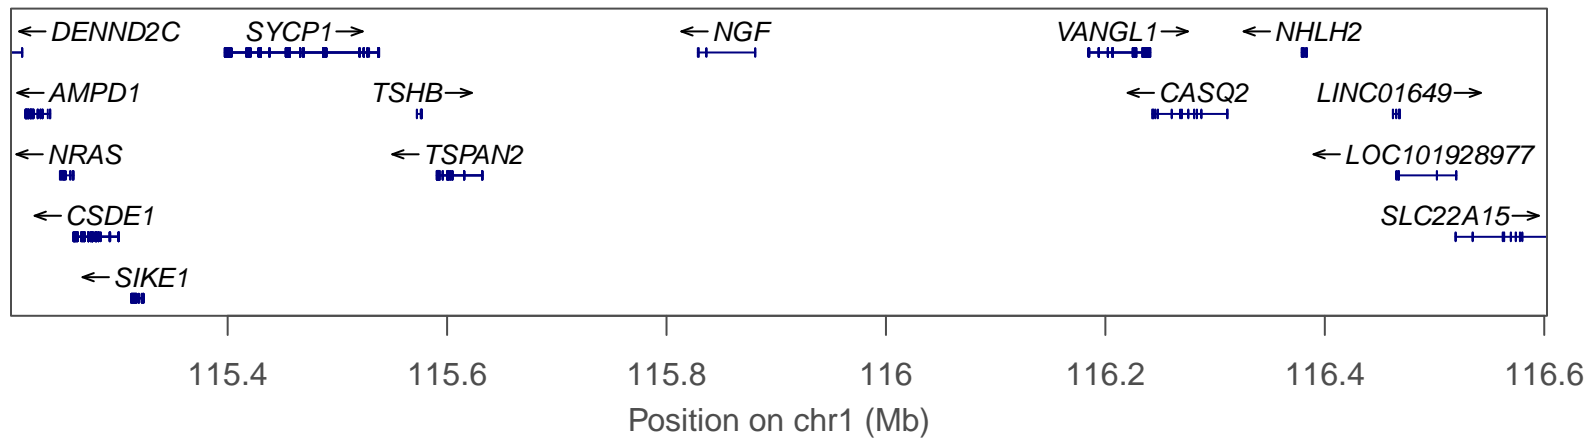

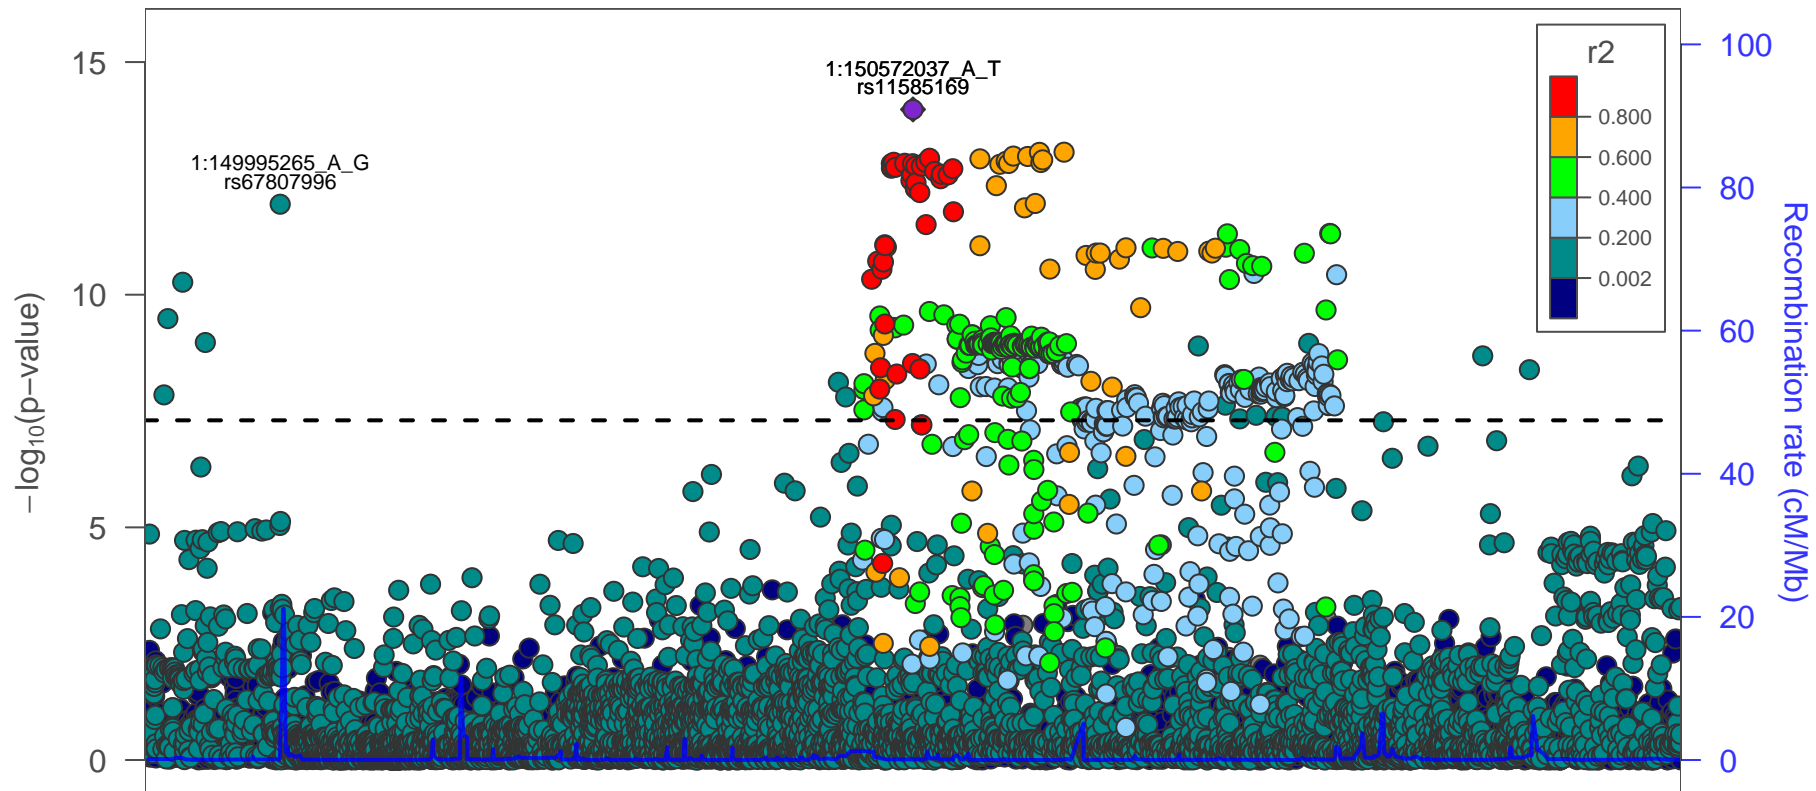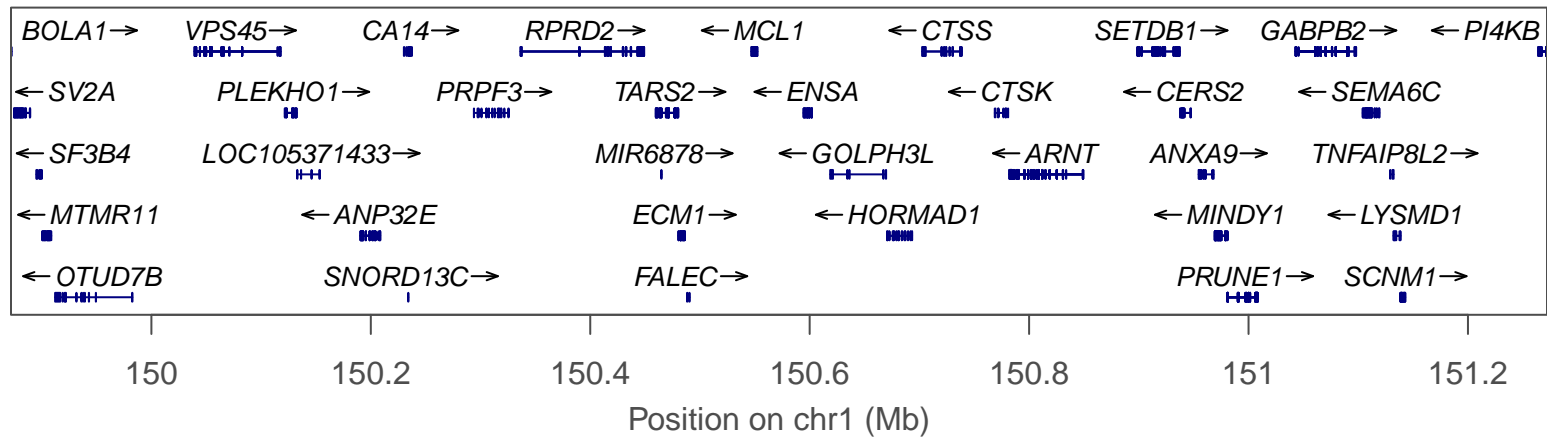

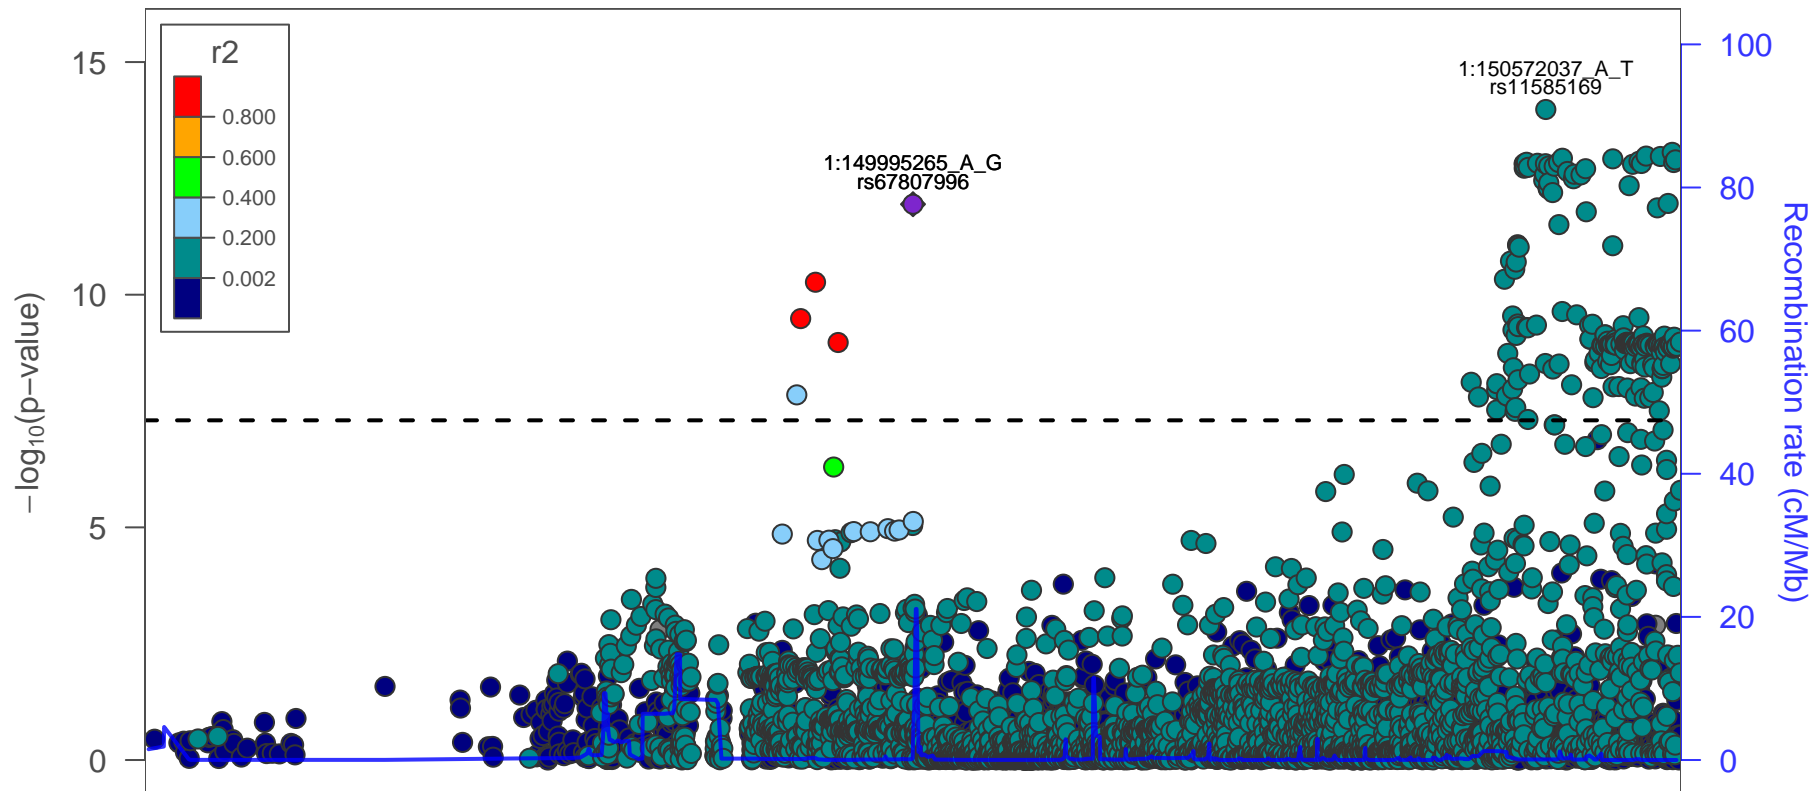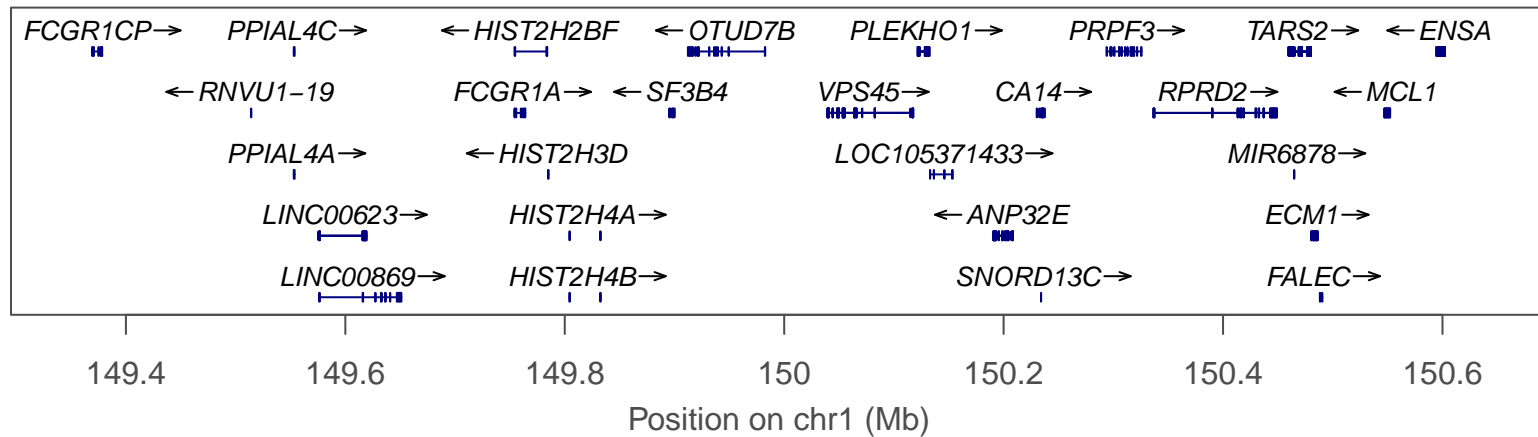



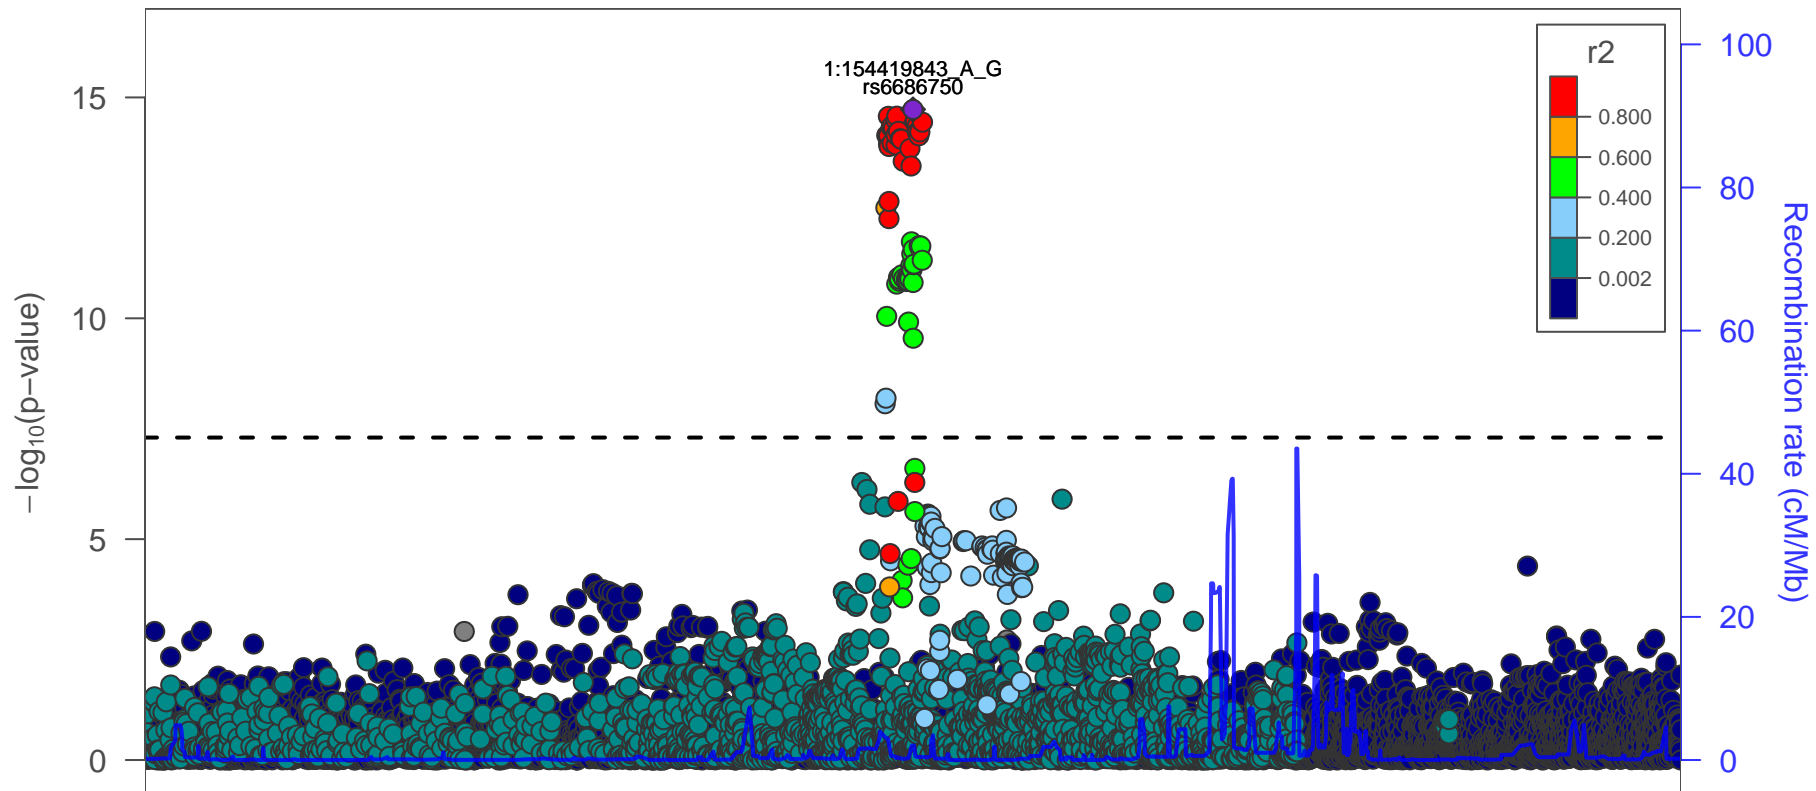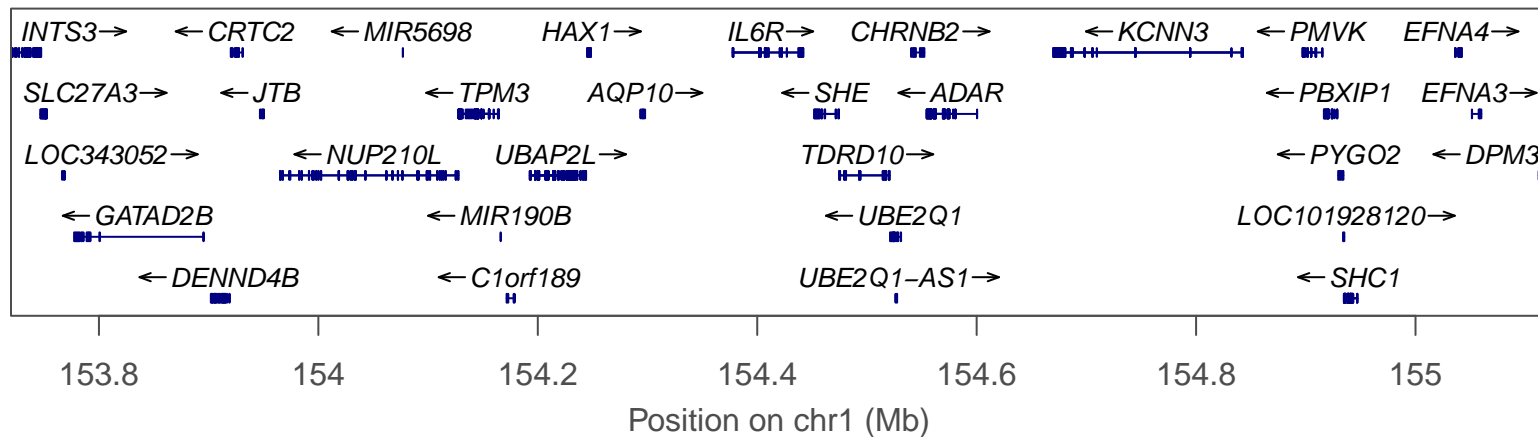

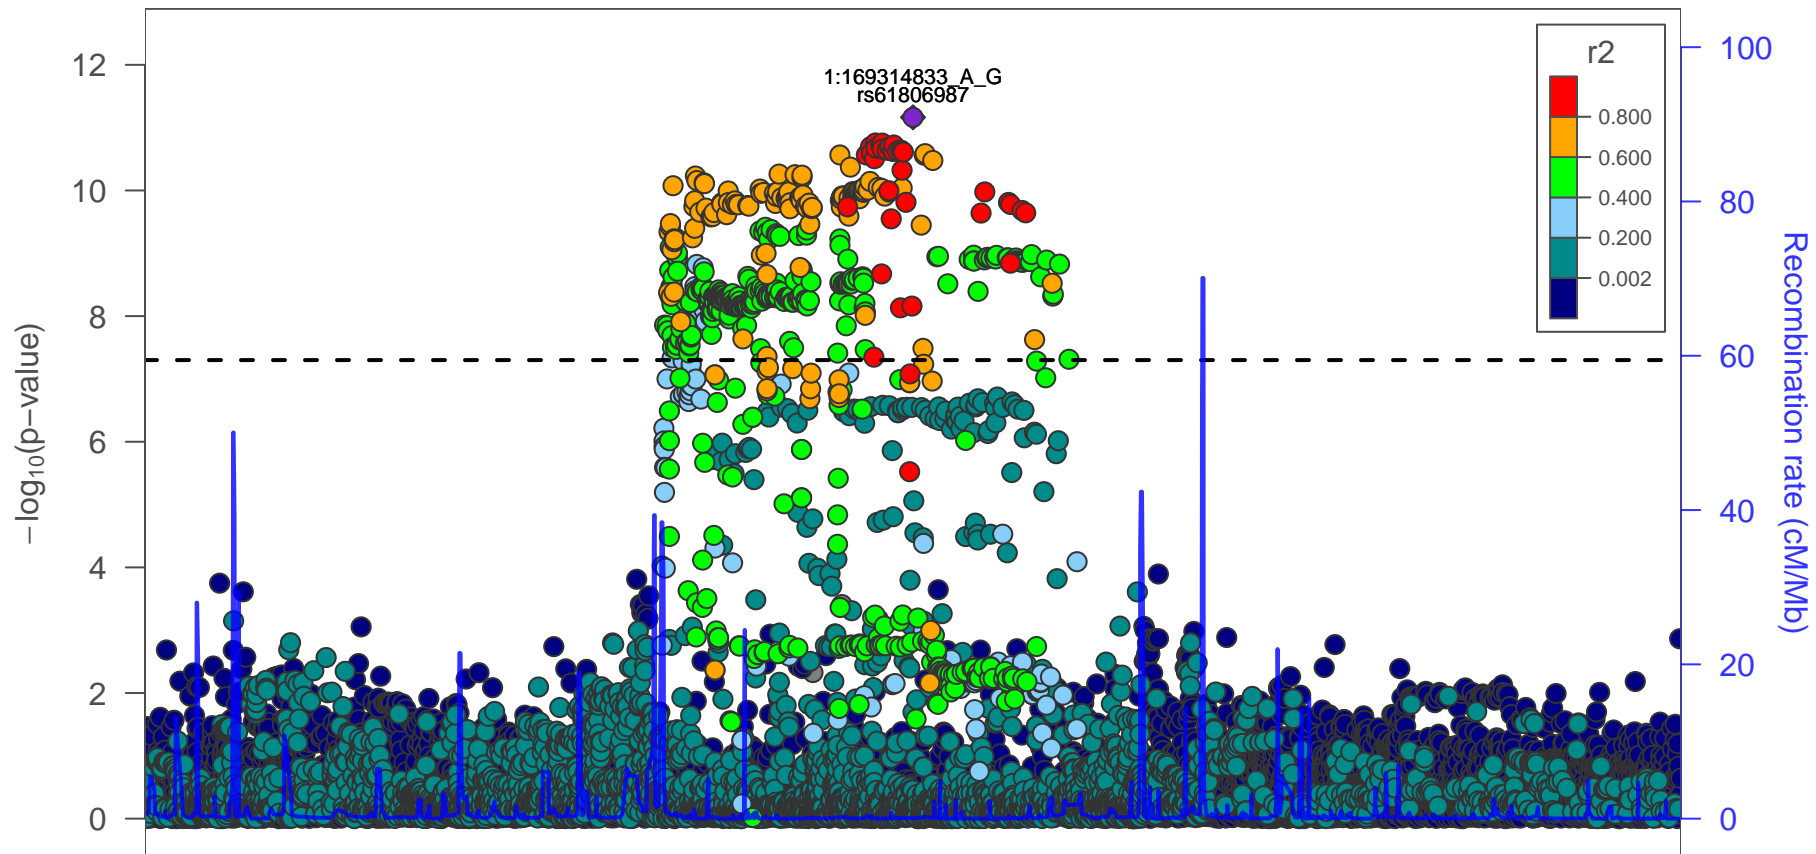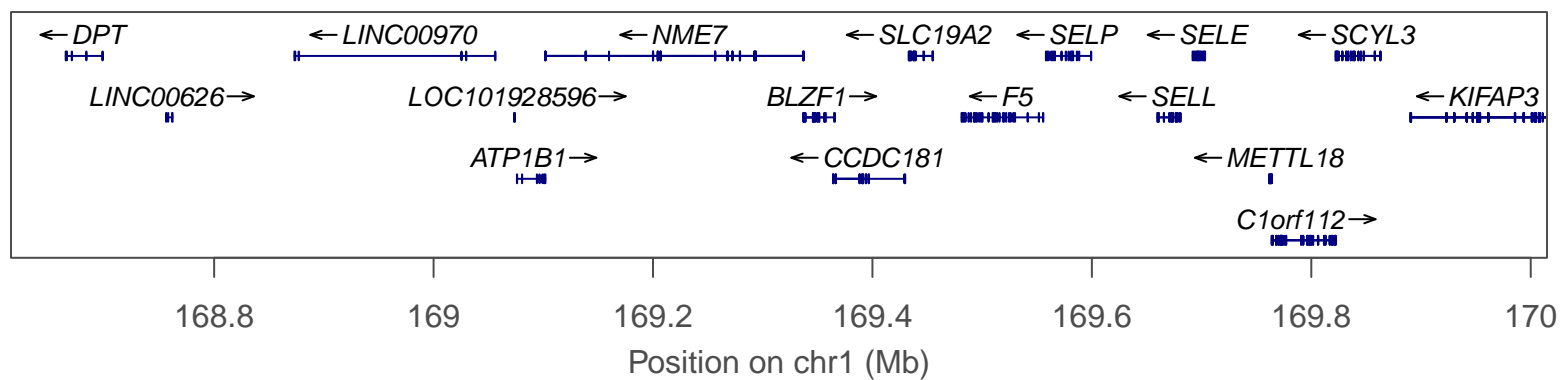

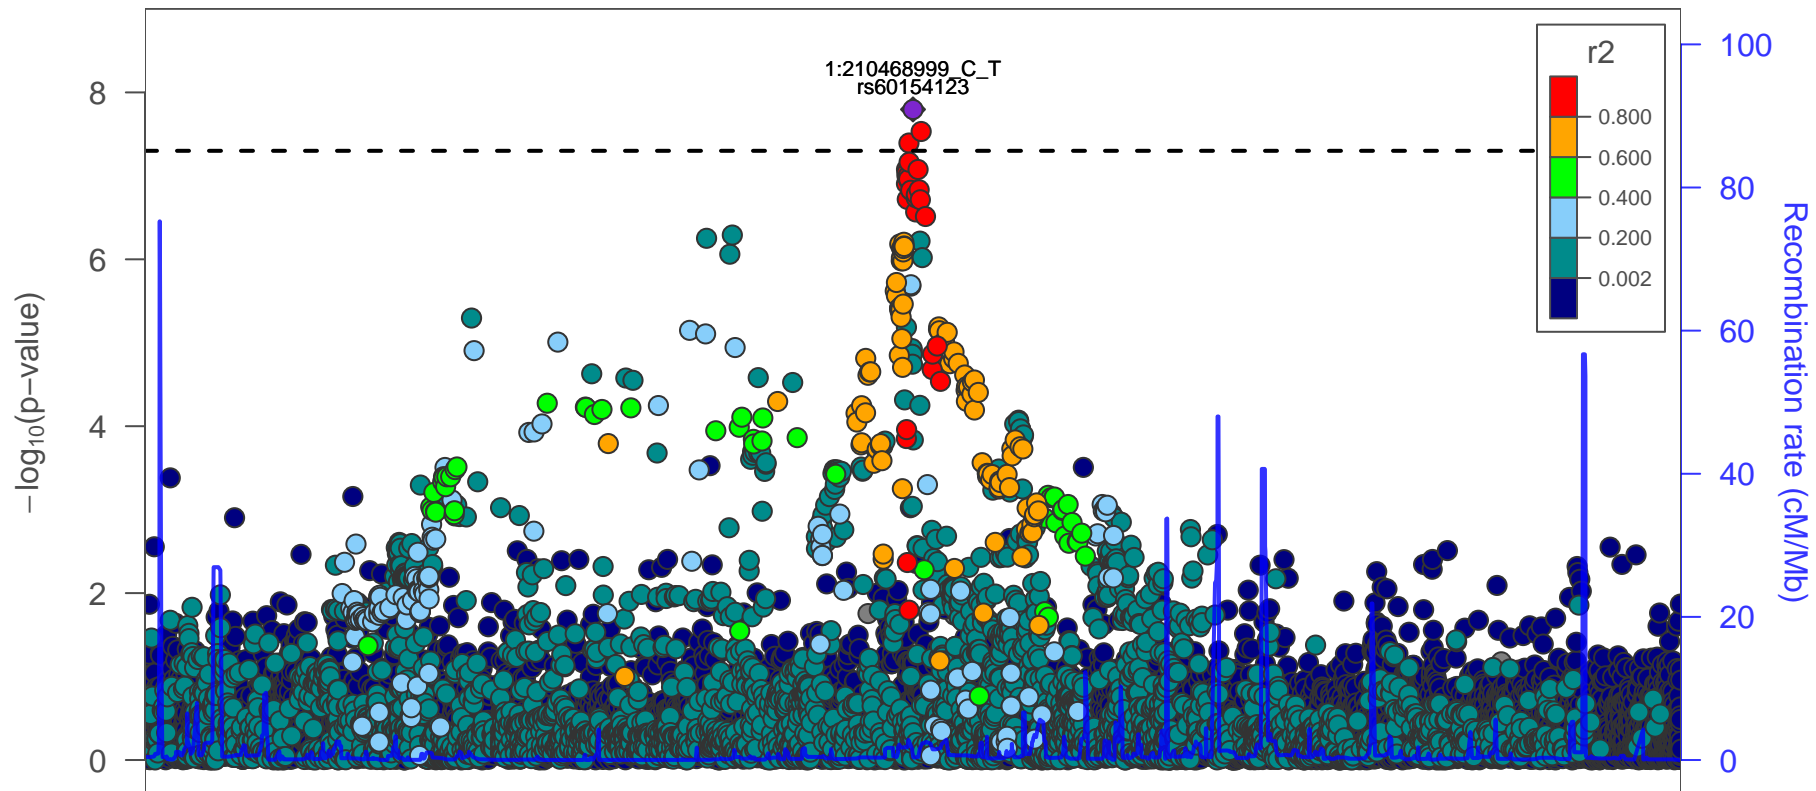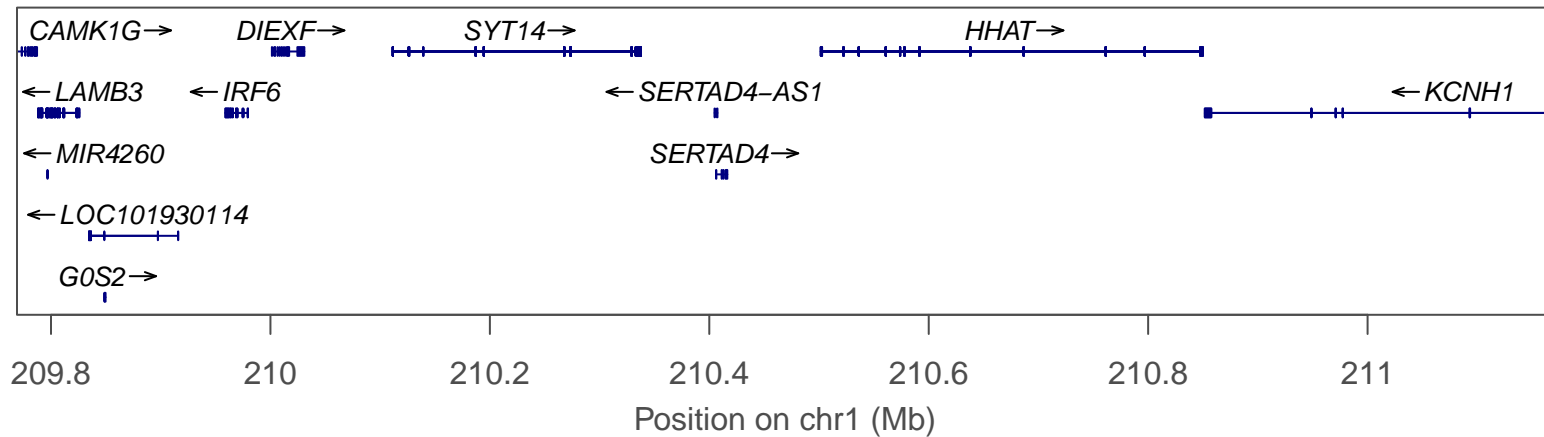

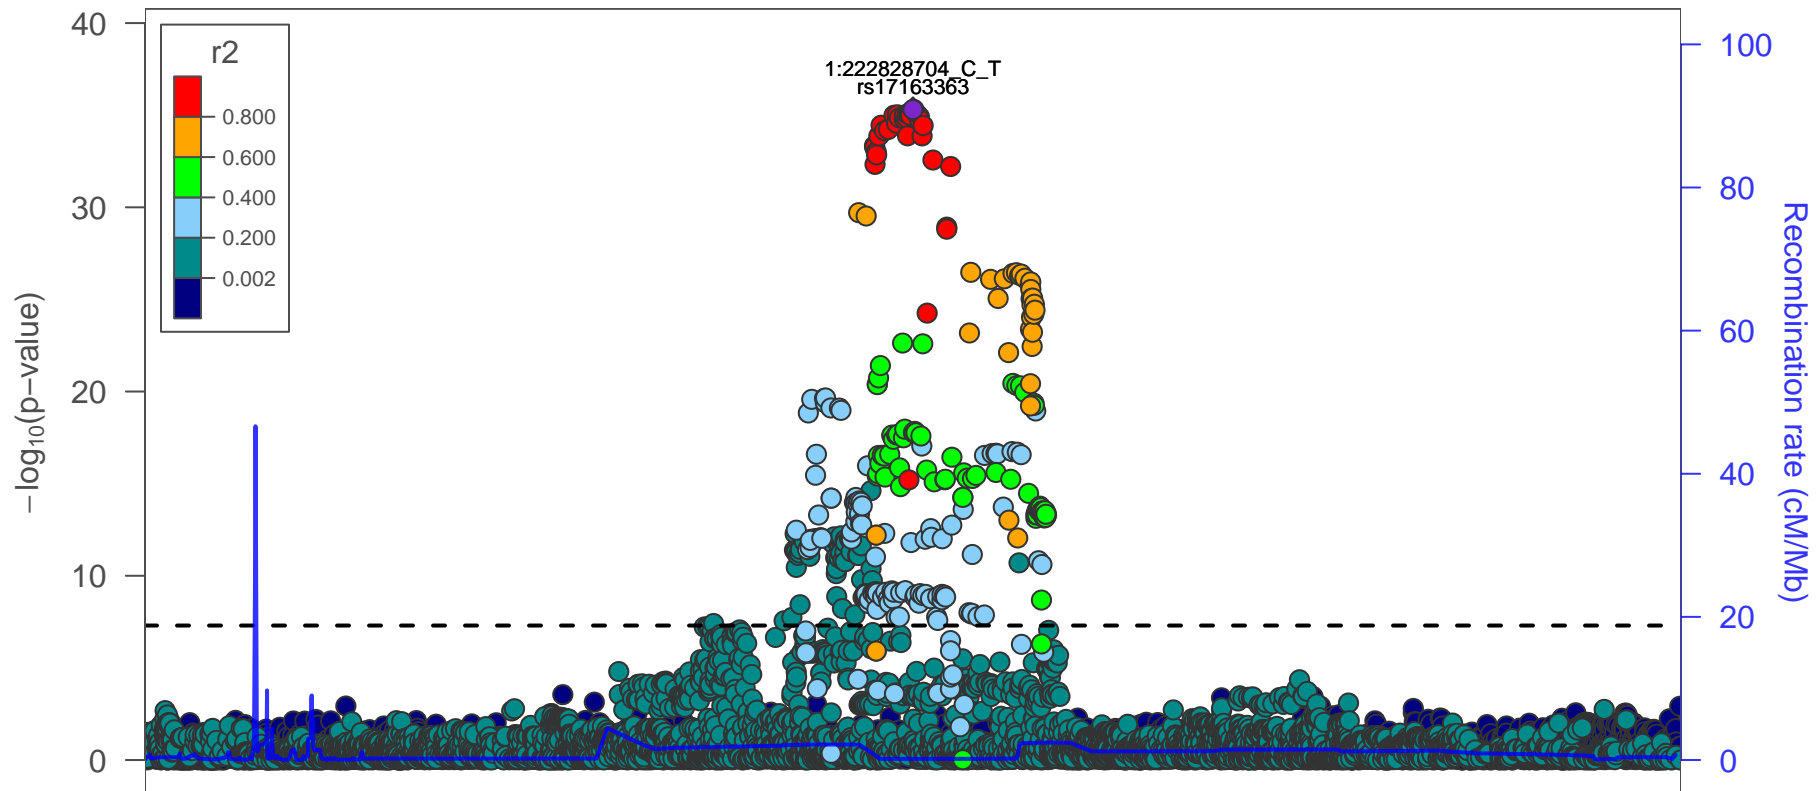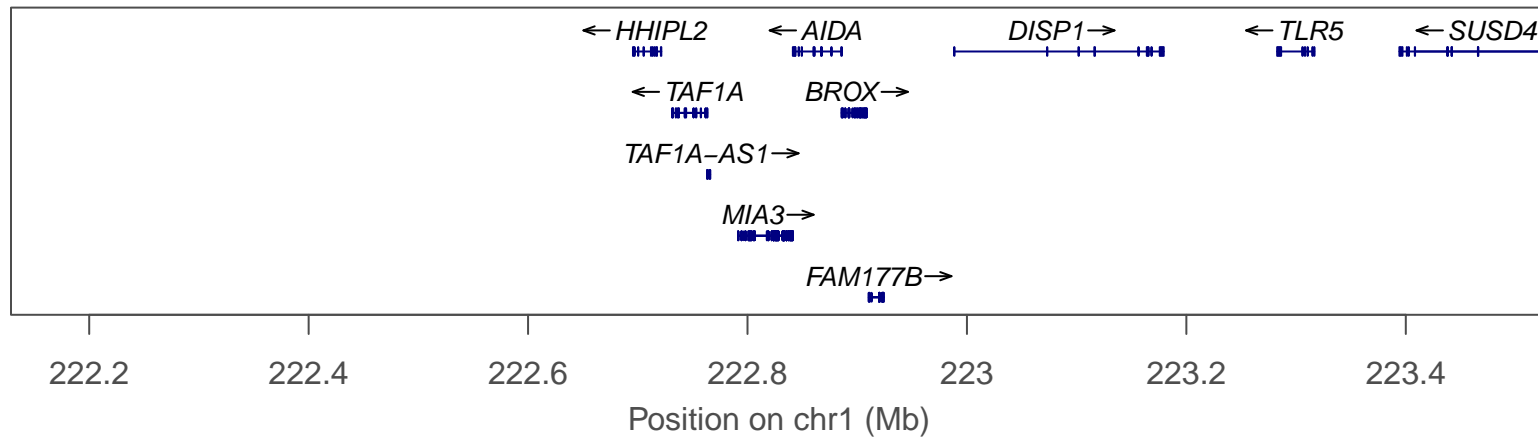

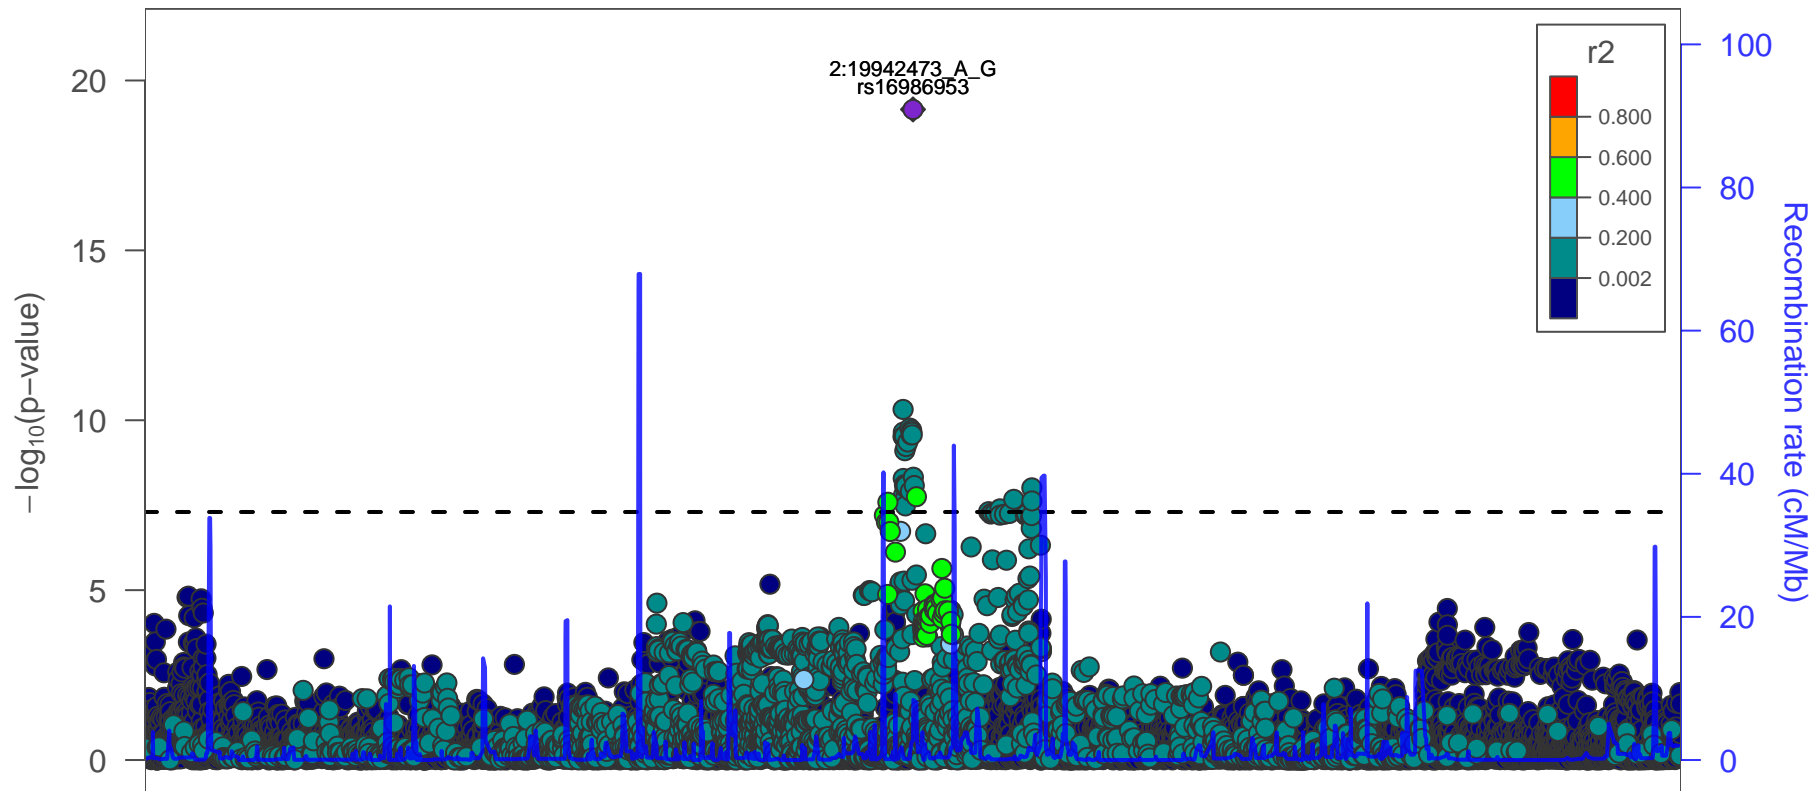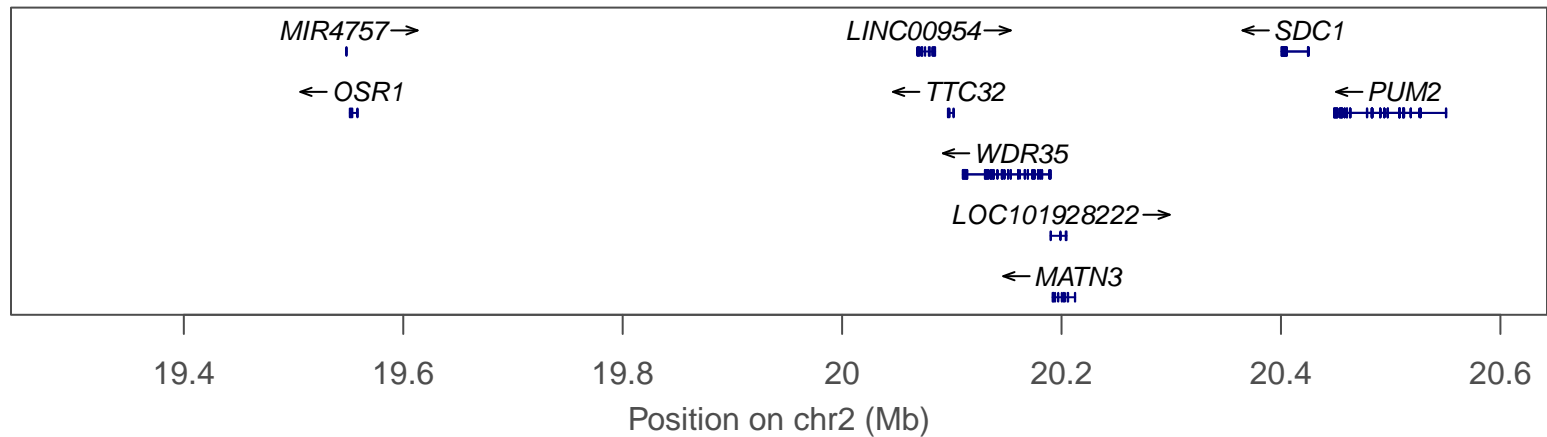

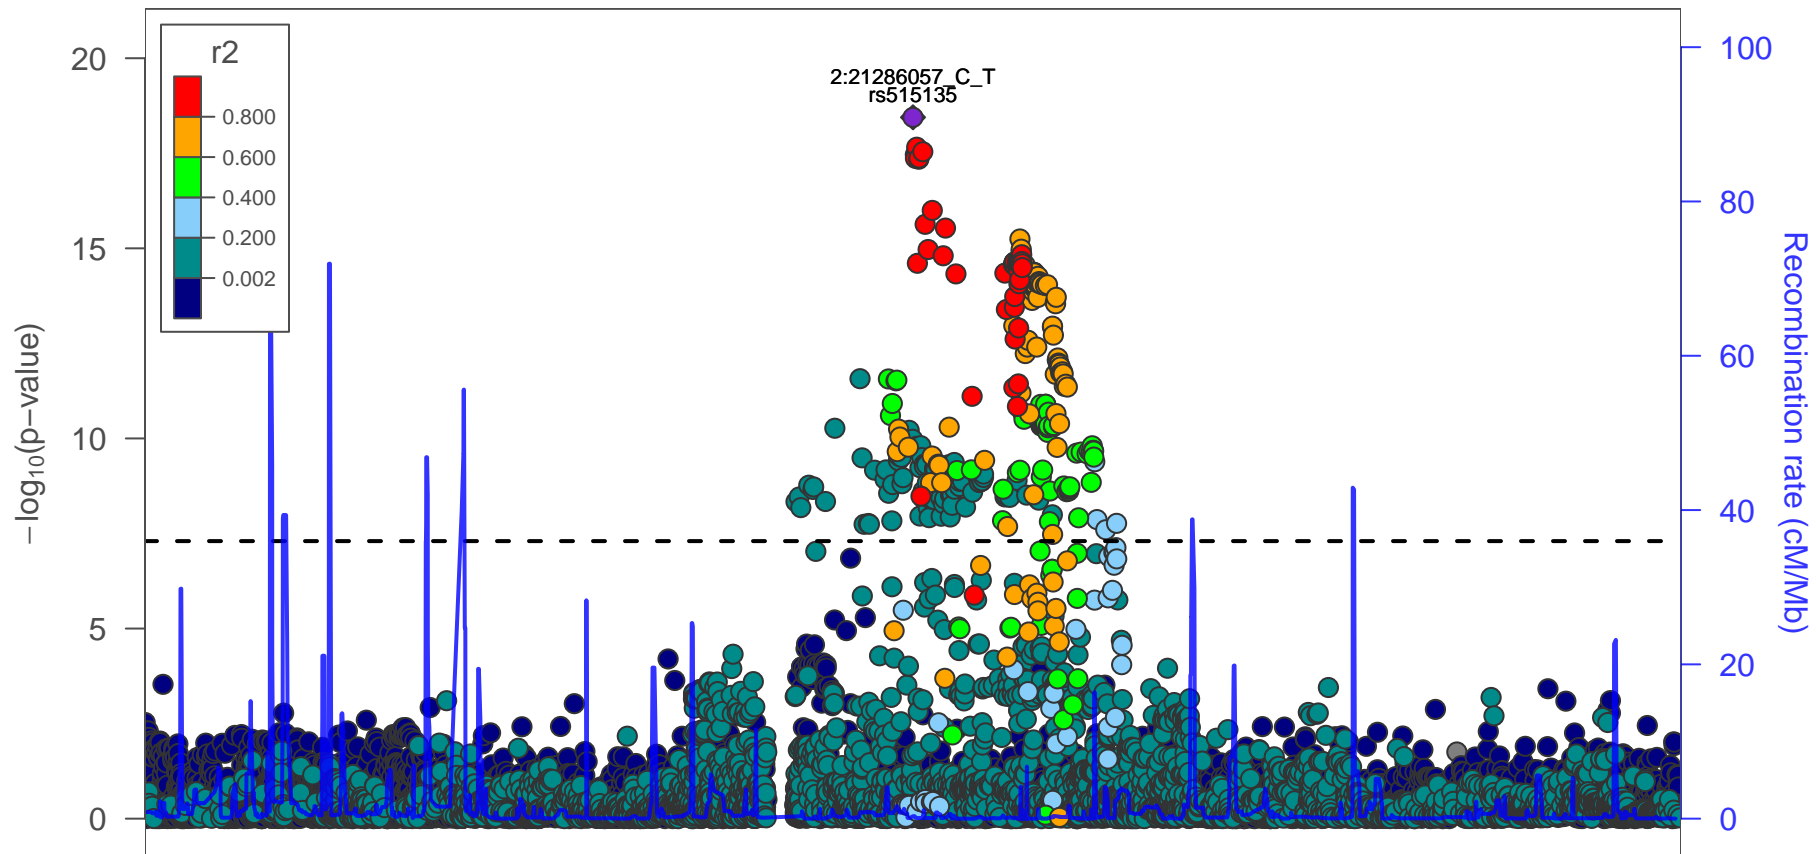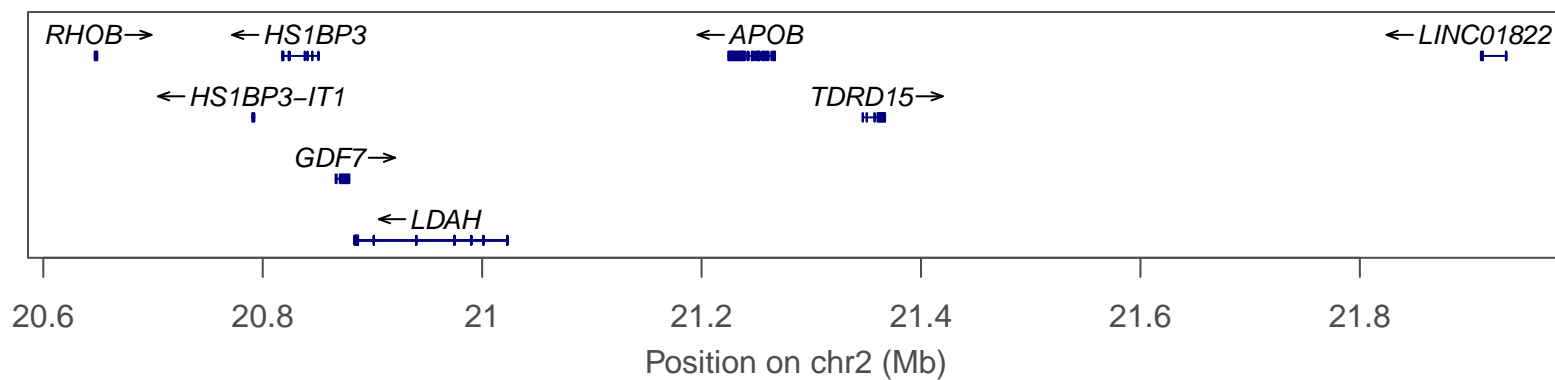

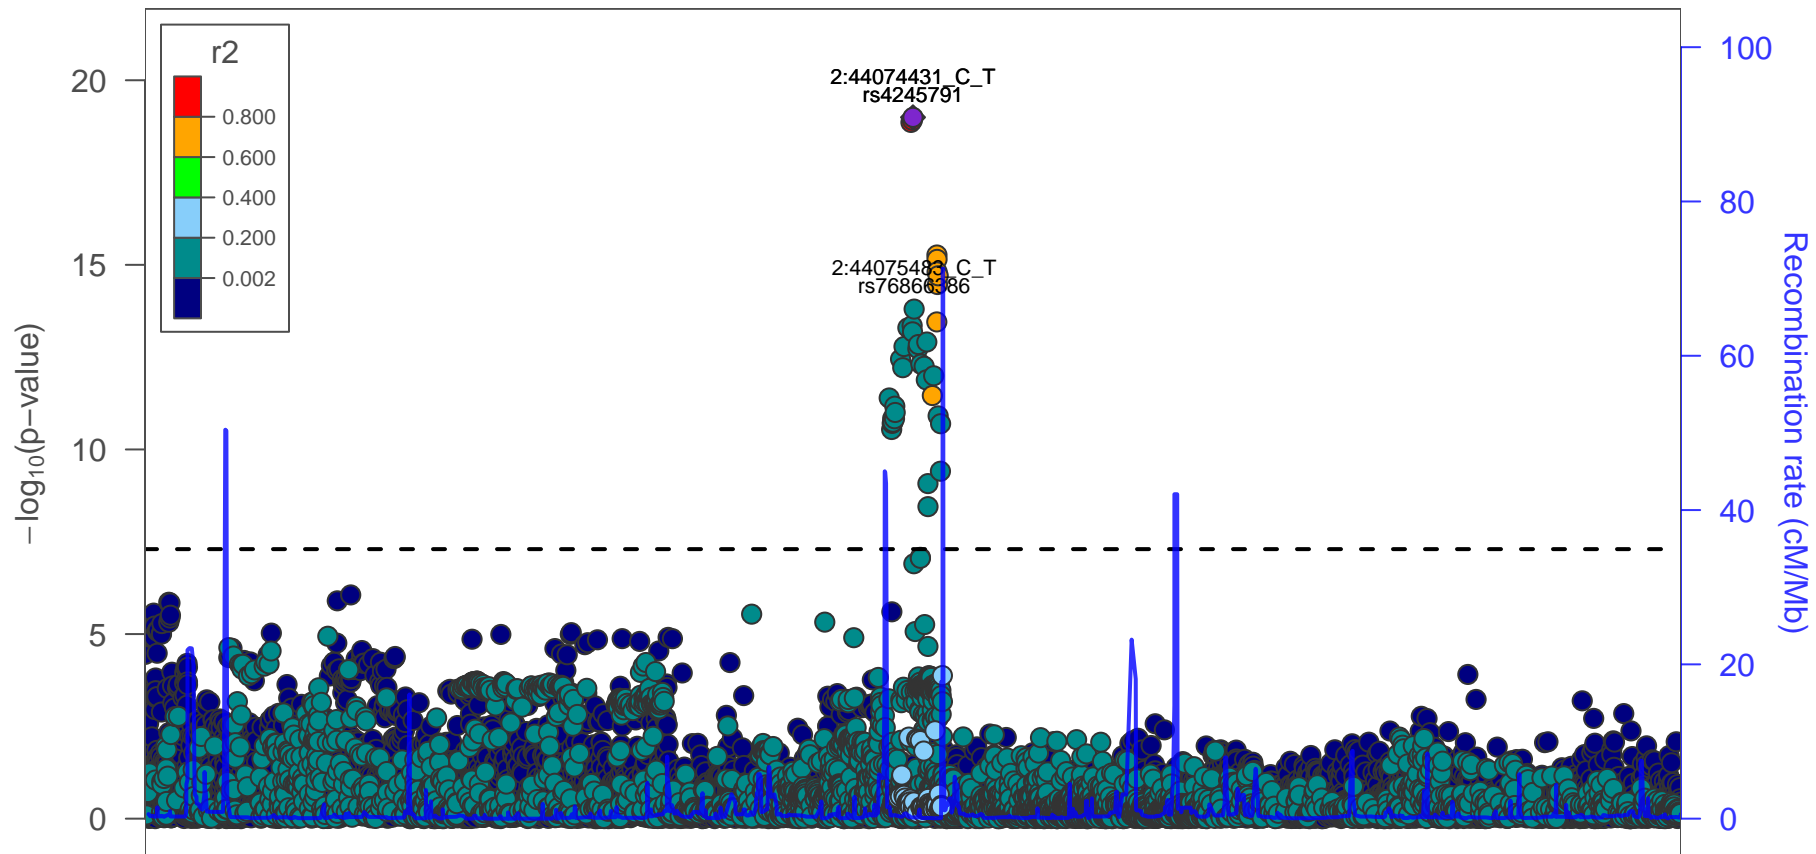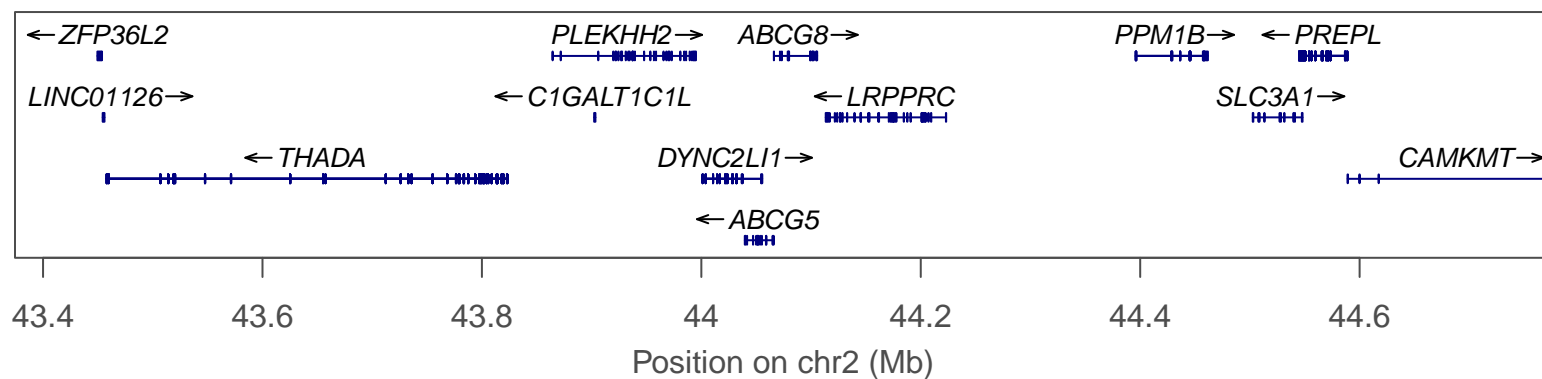

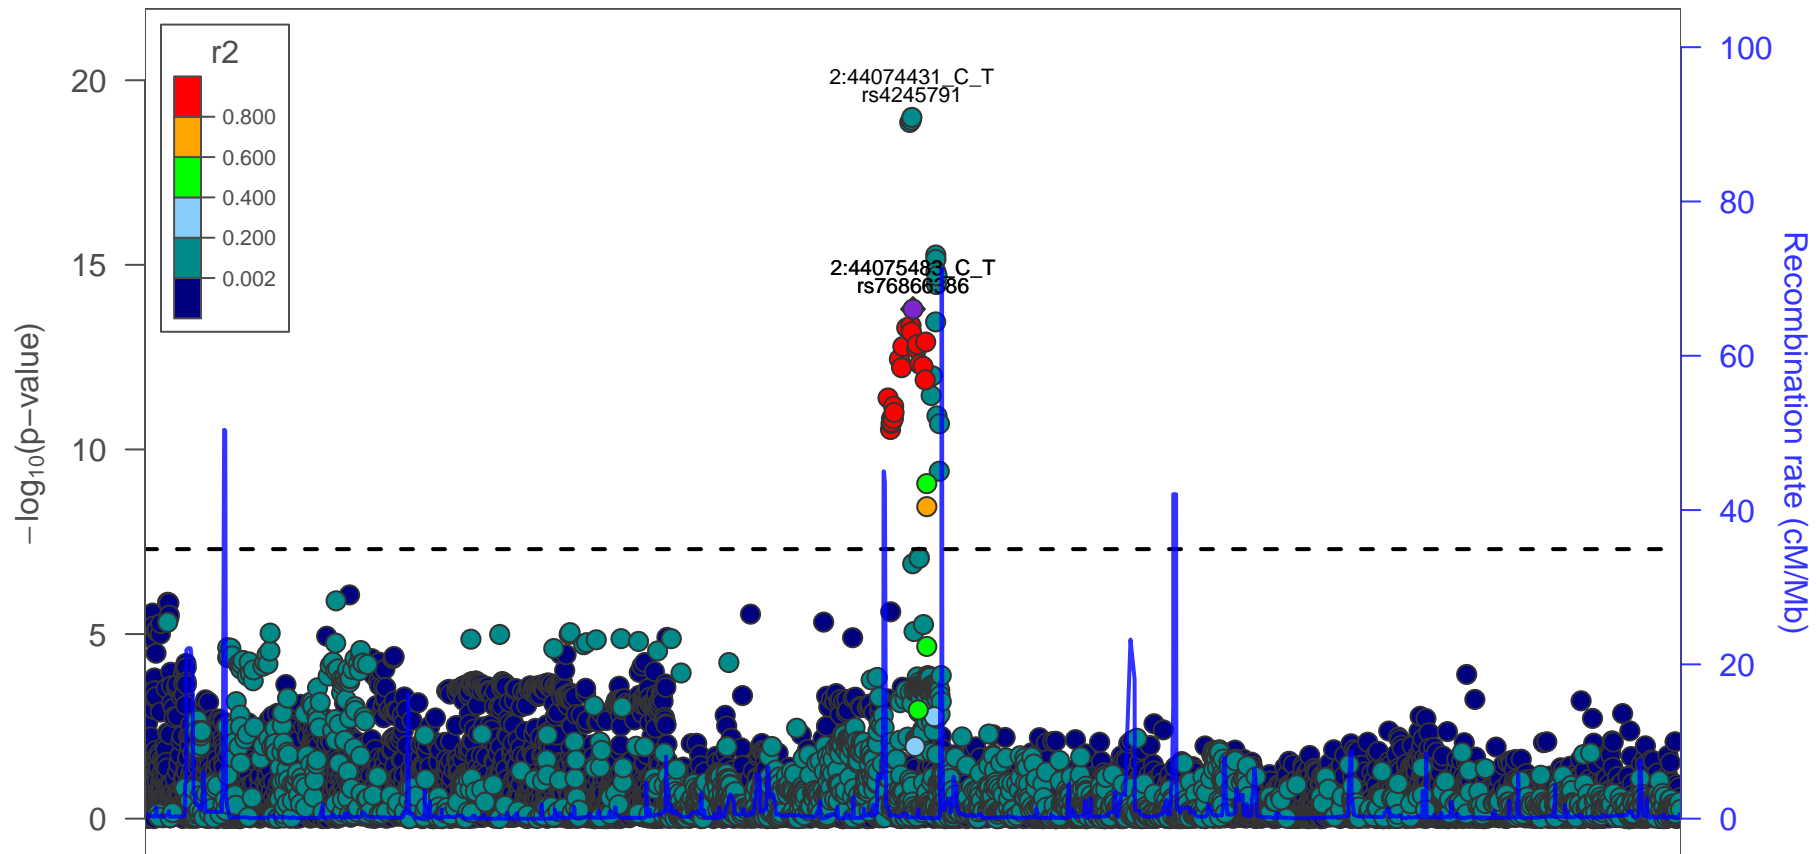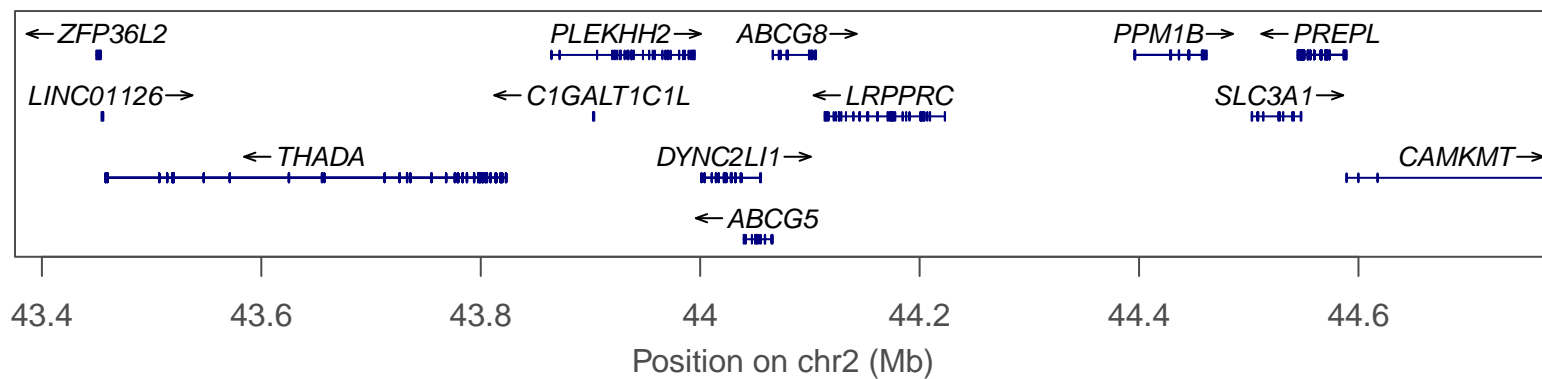



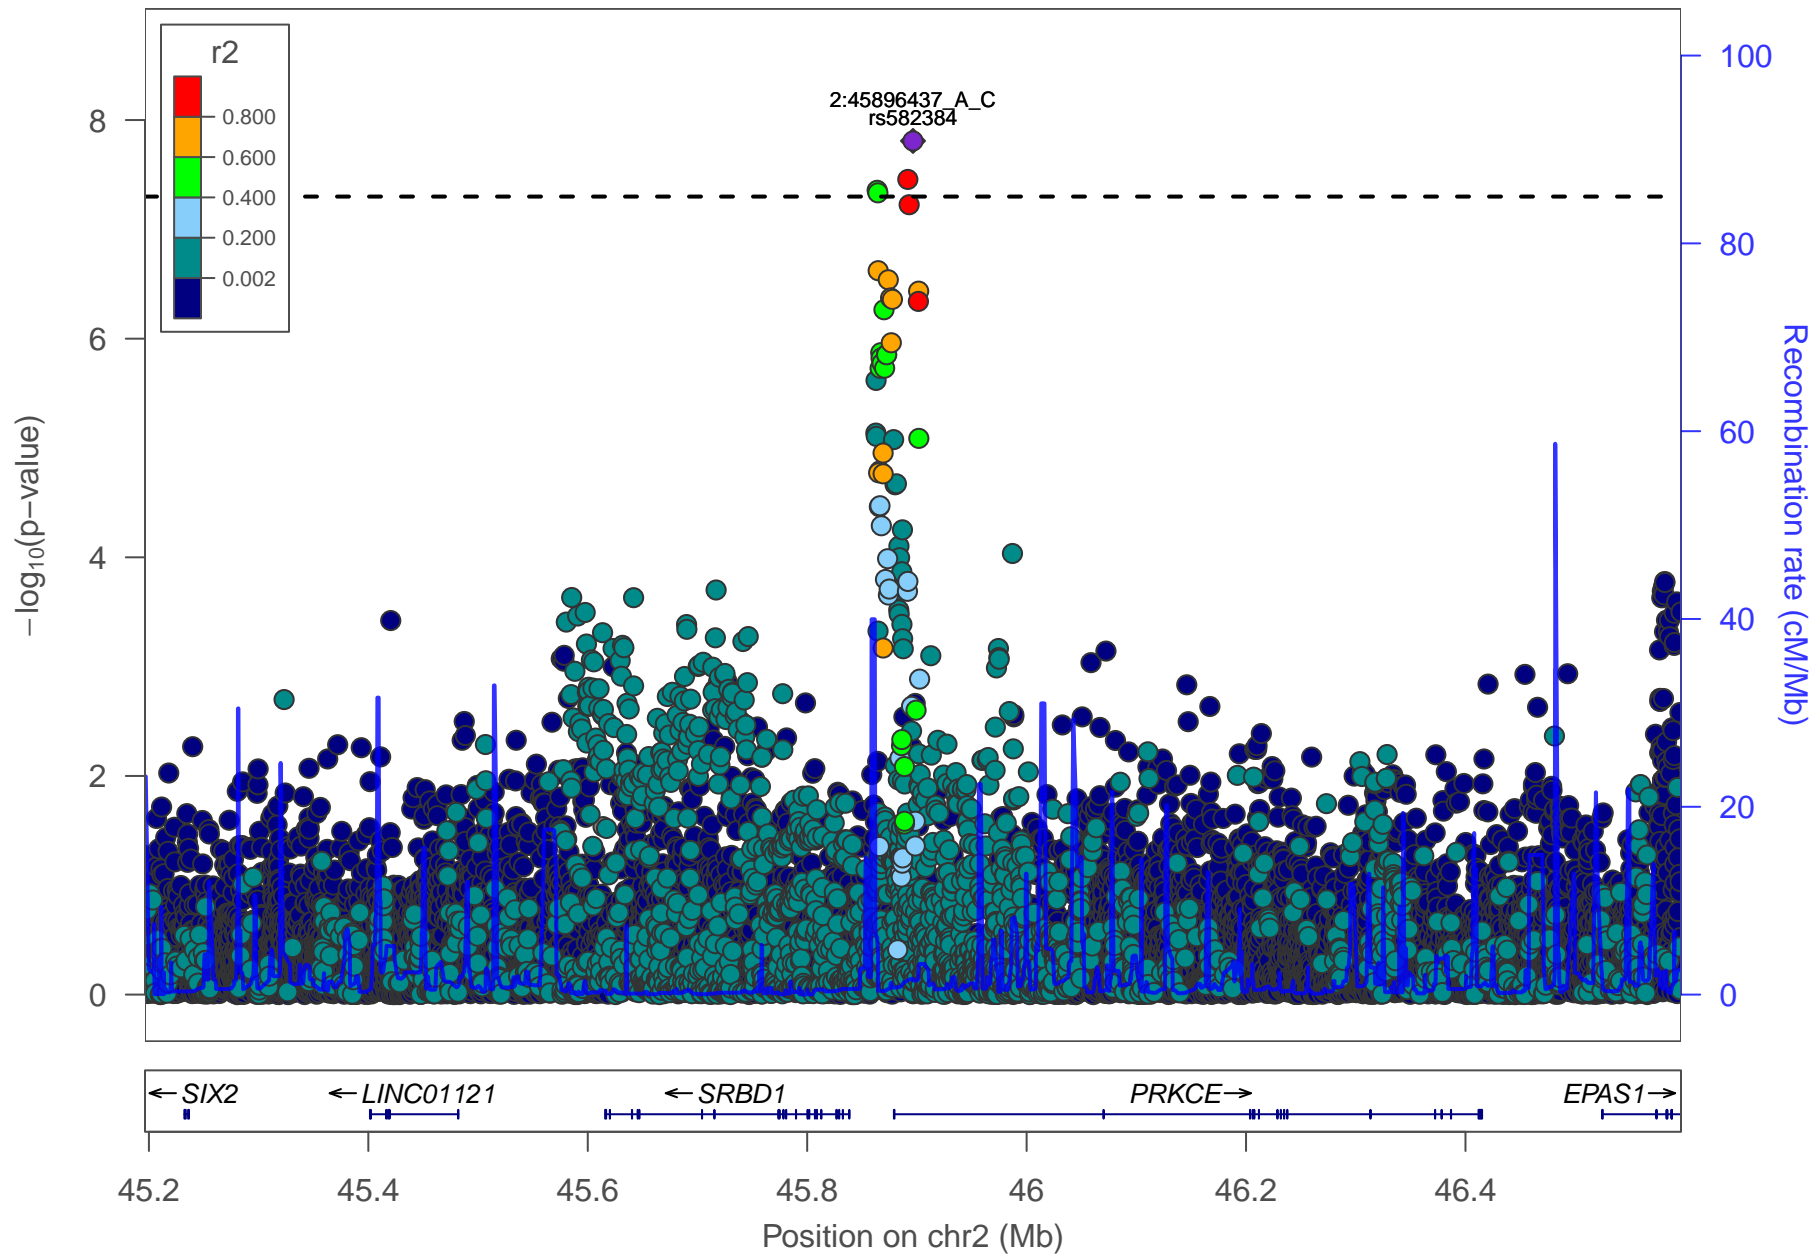

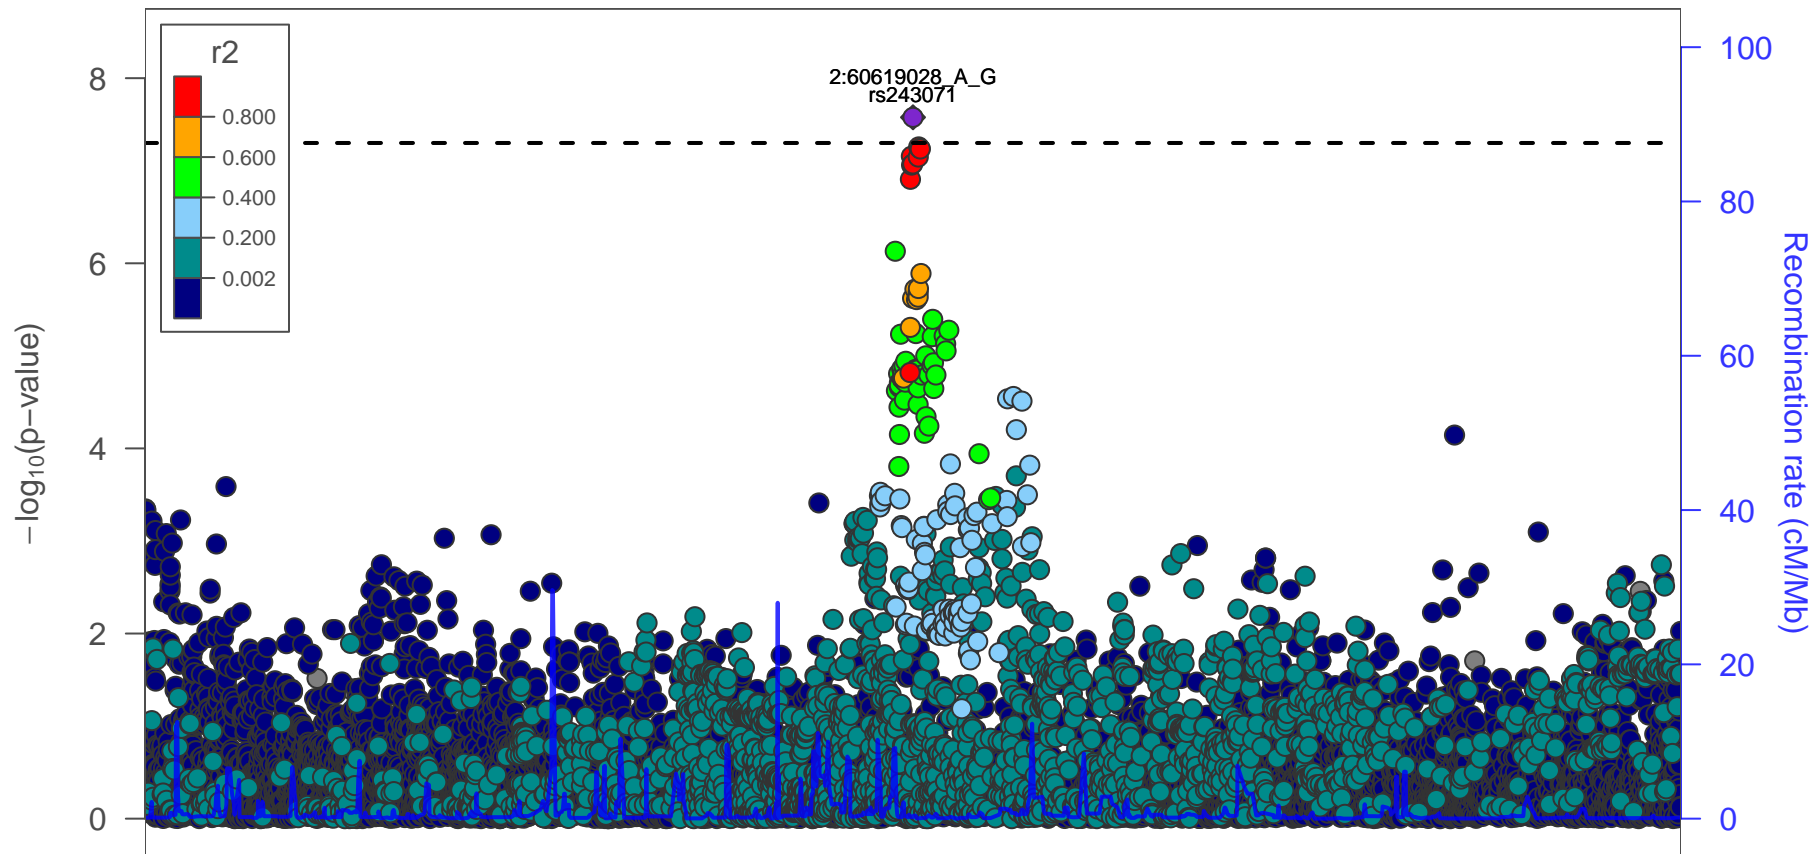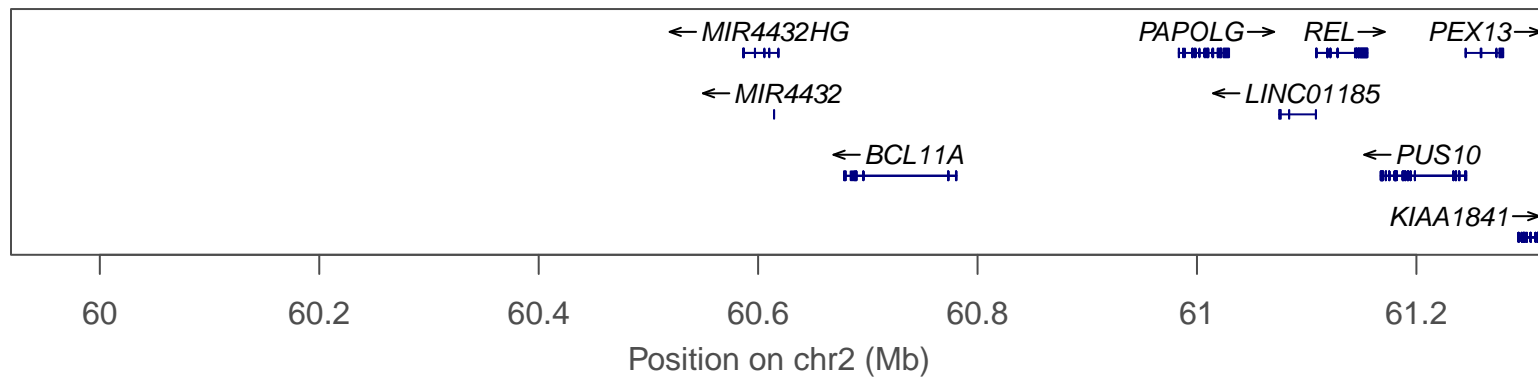

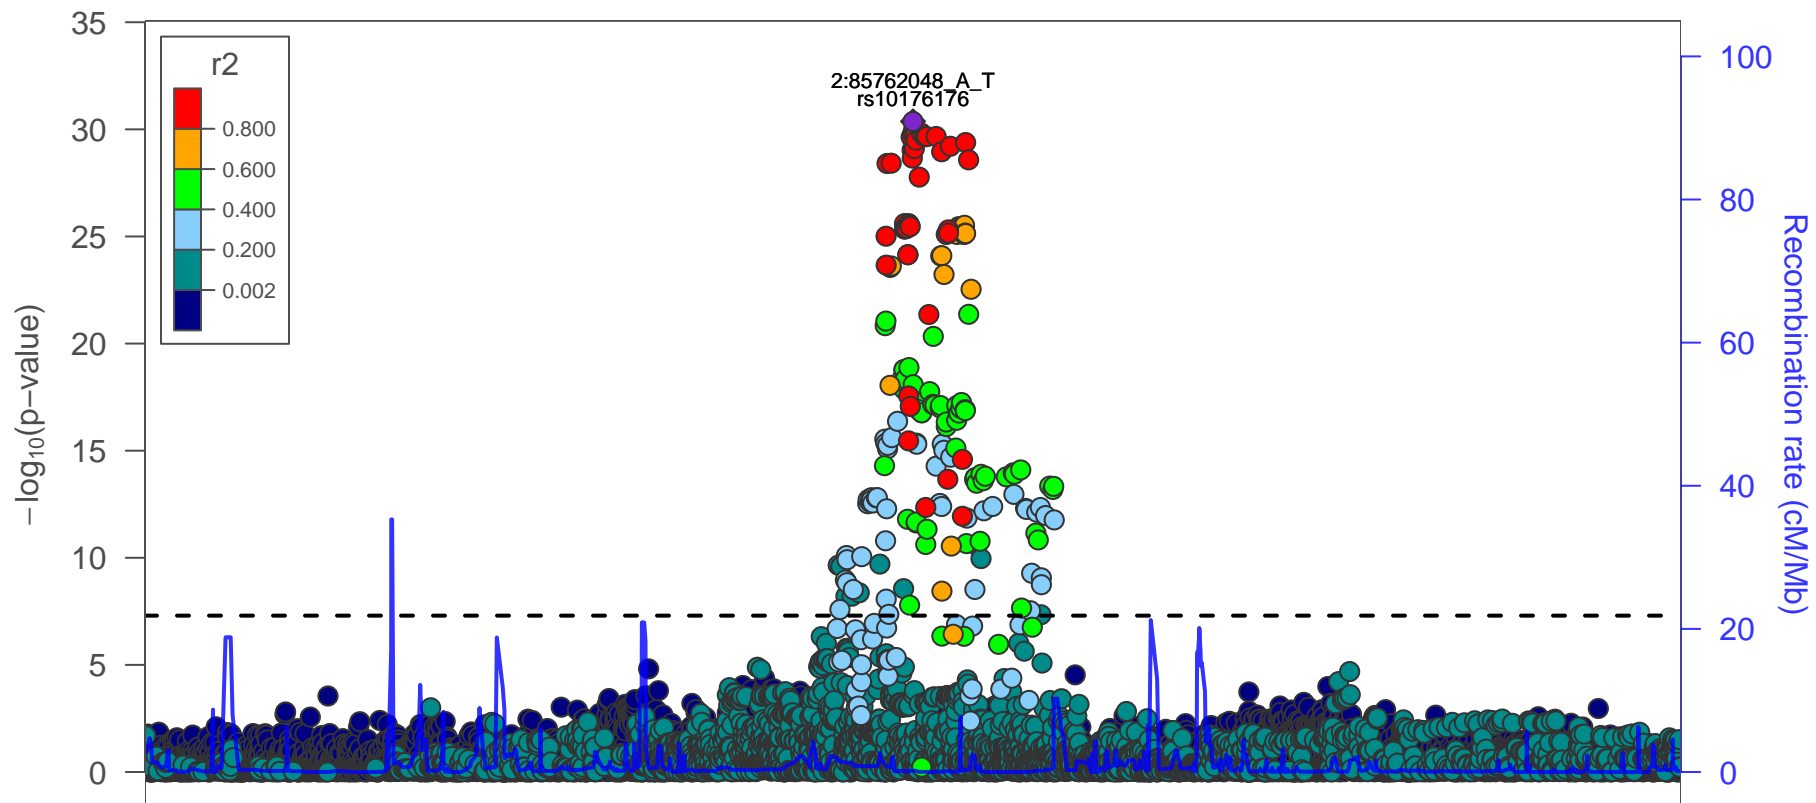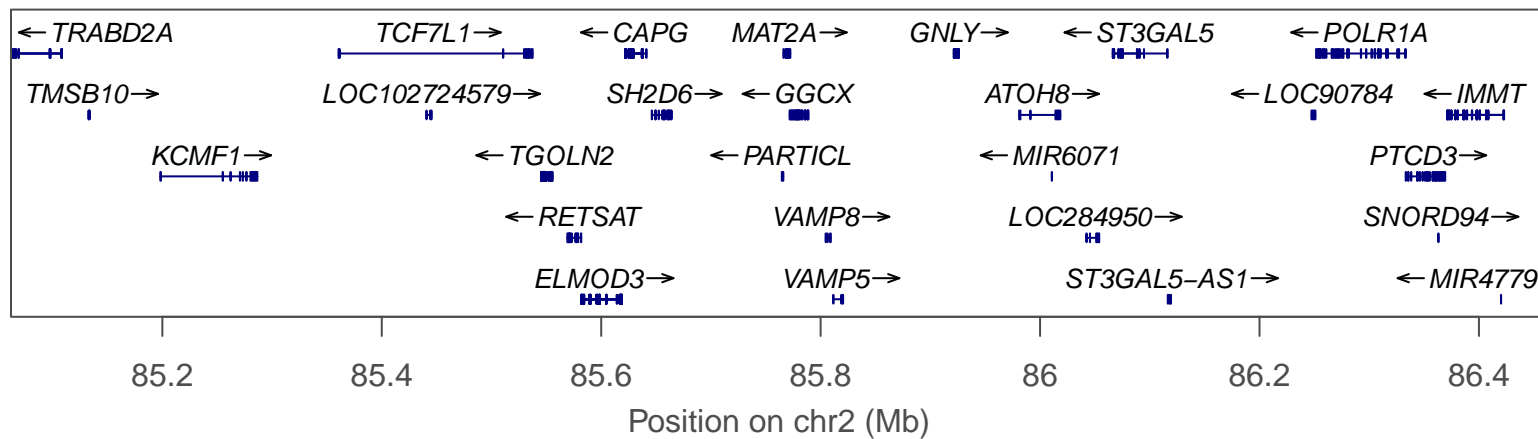

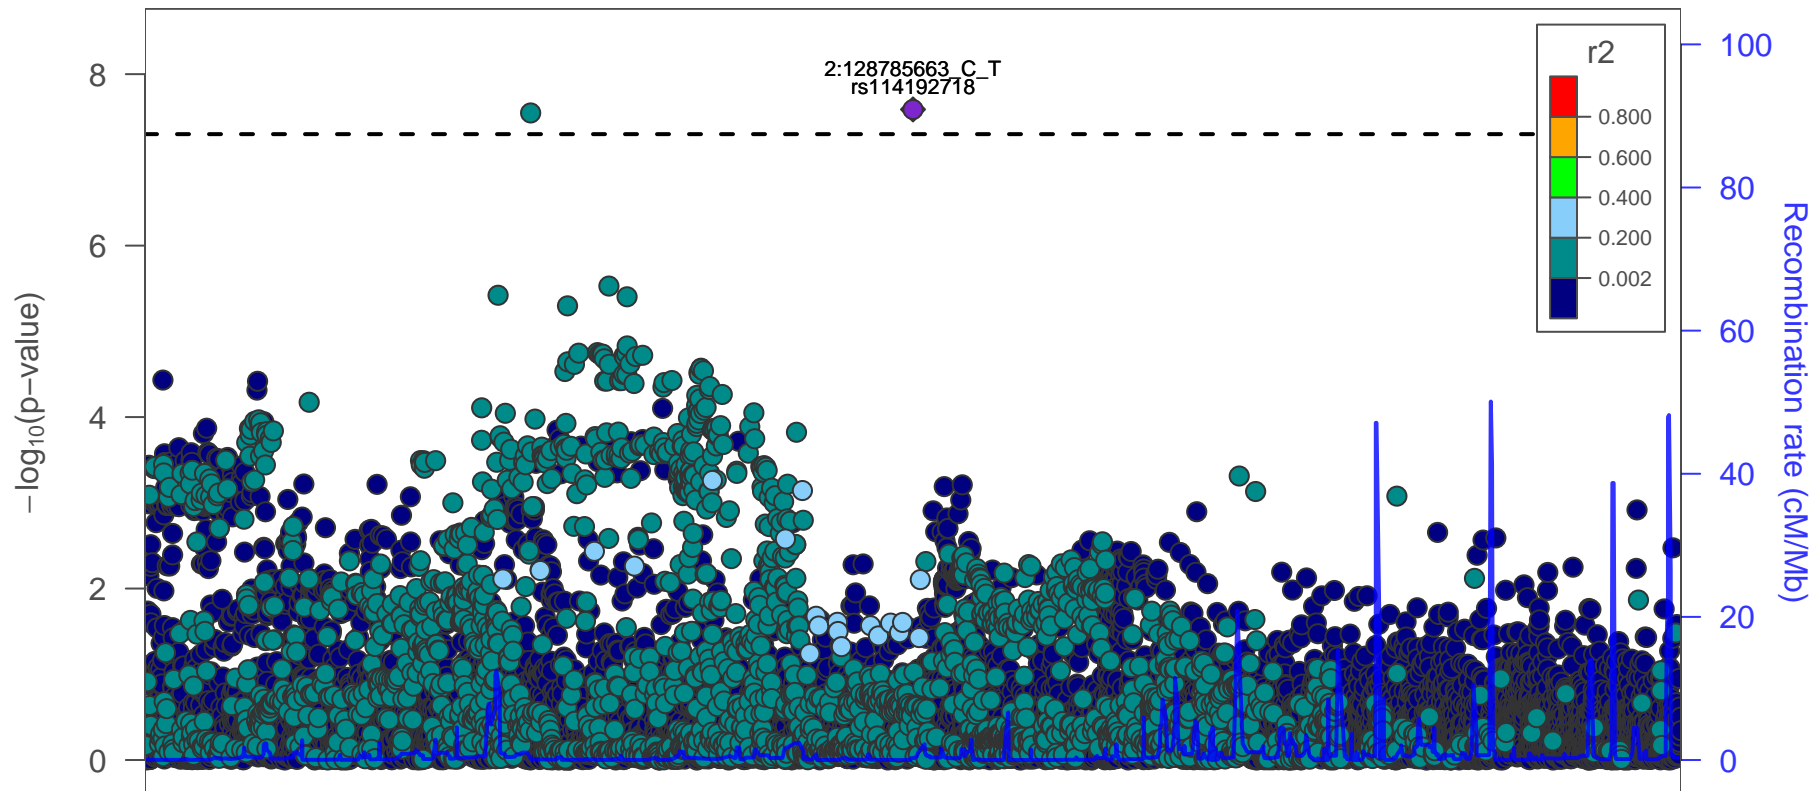

2:128785663\_C\_T  
rs114192718

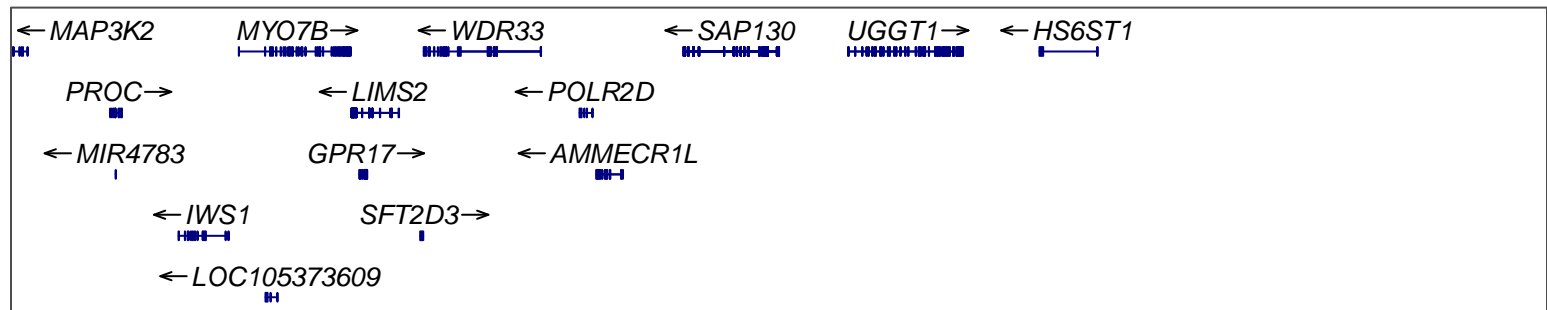

128.2      128.4      128.6      128.8      129      129.2      129.4

Position on chr2 (Mb)

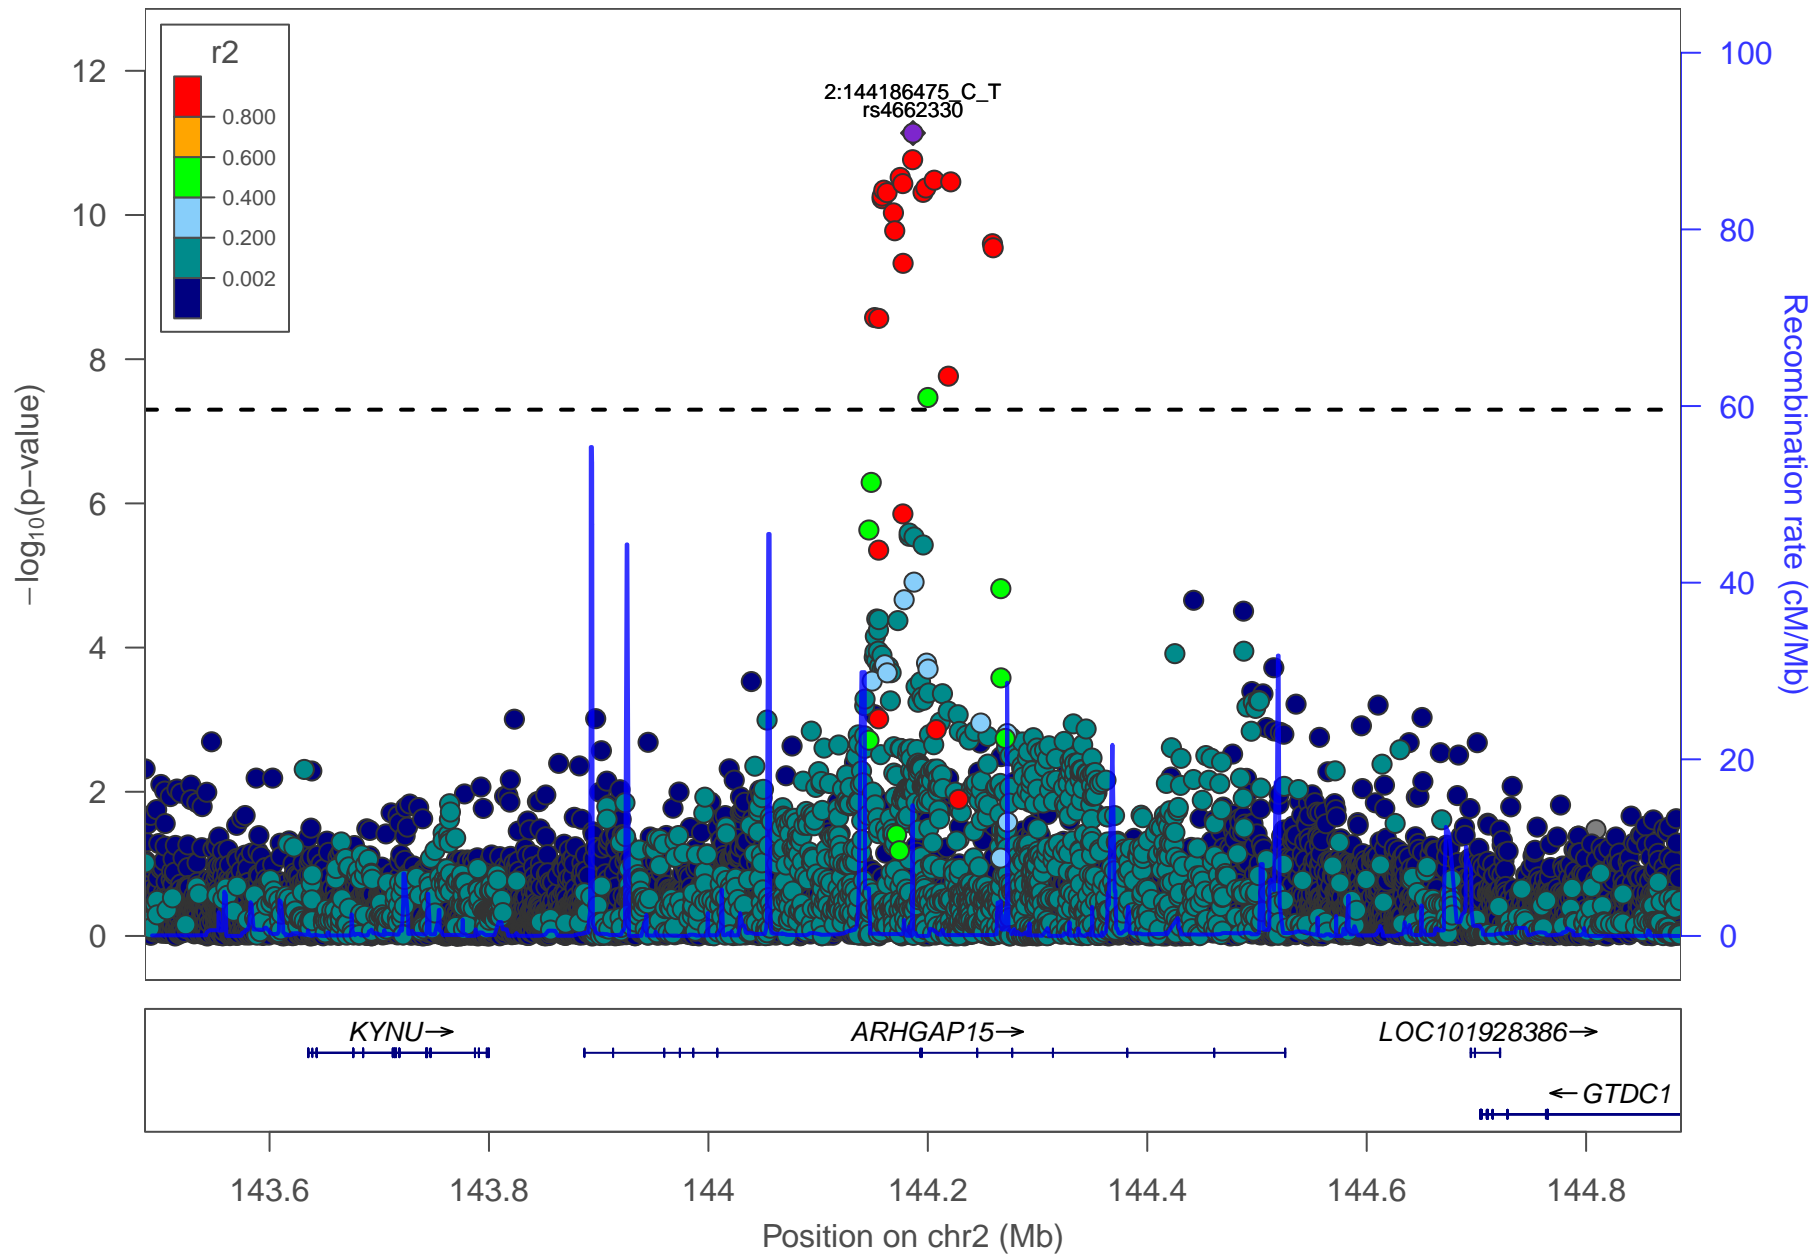

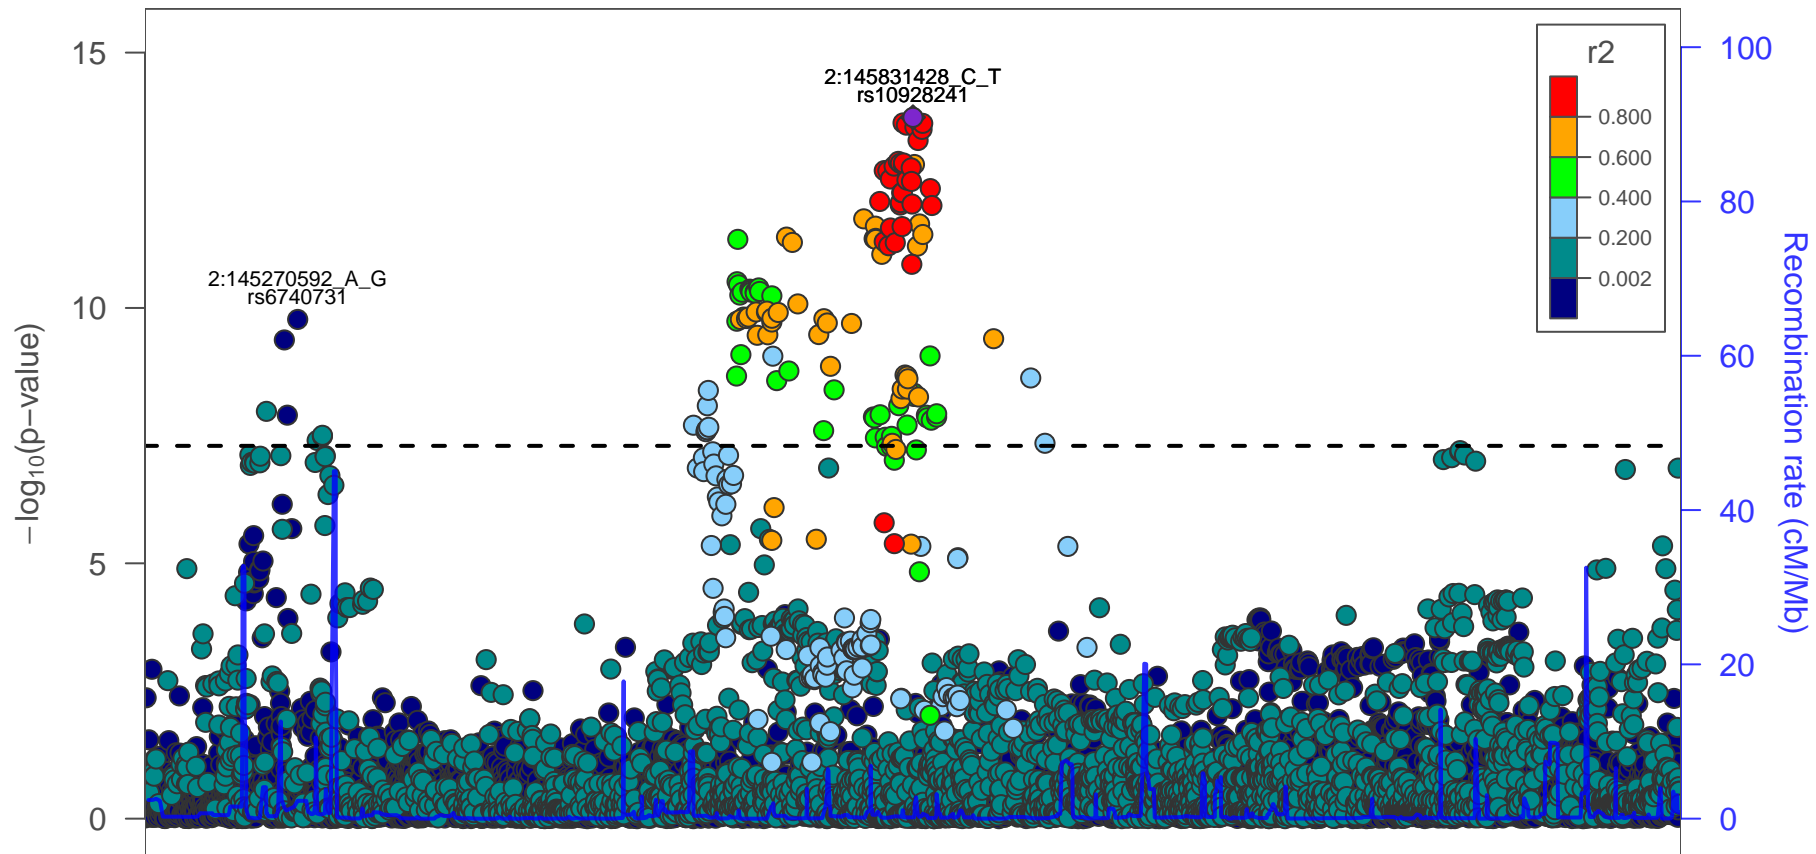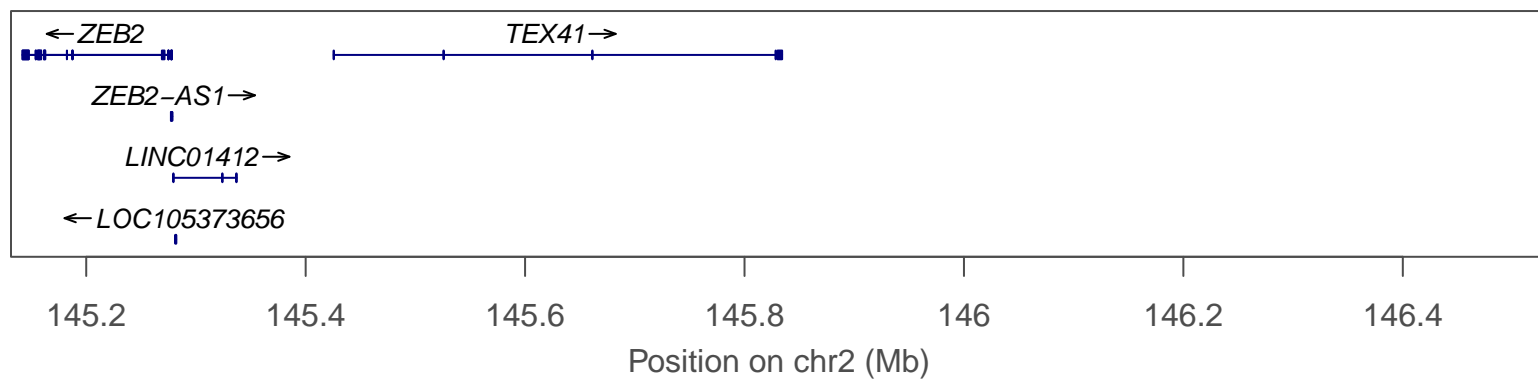

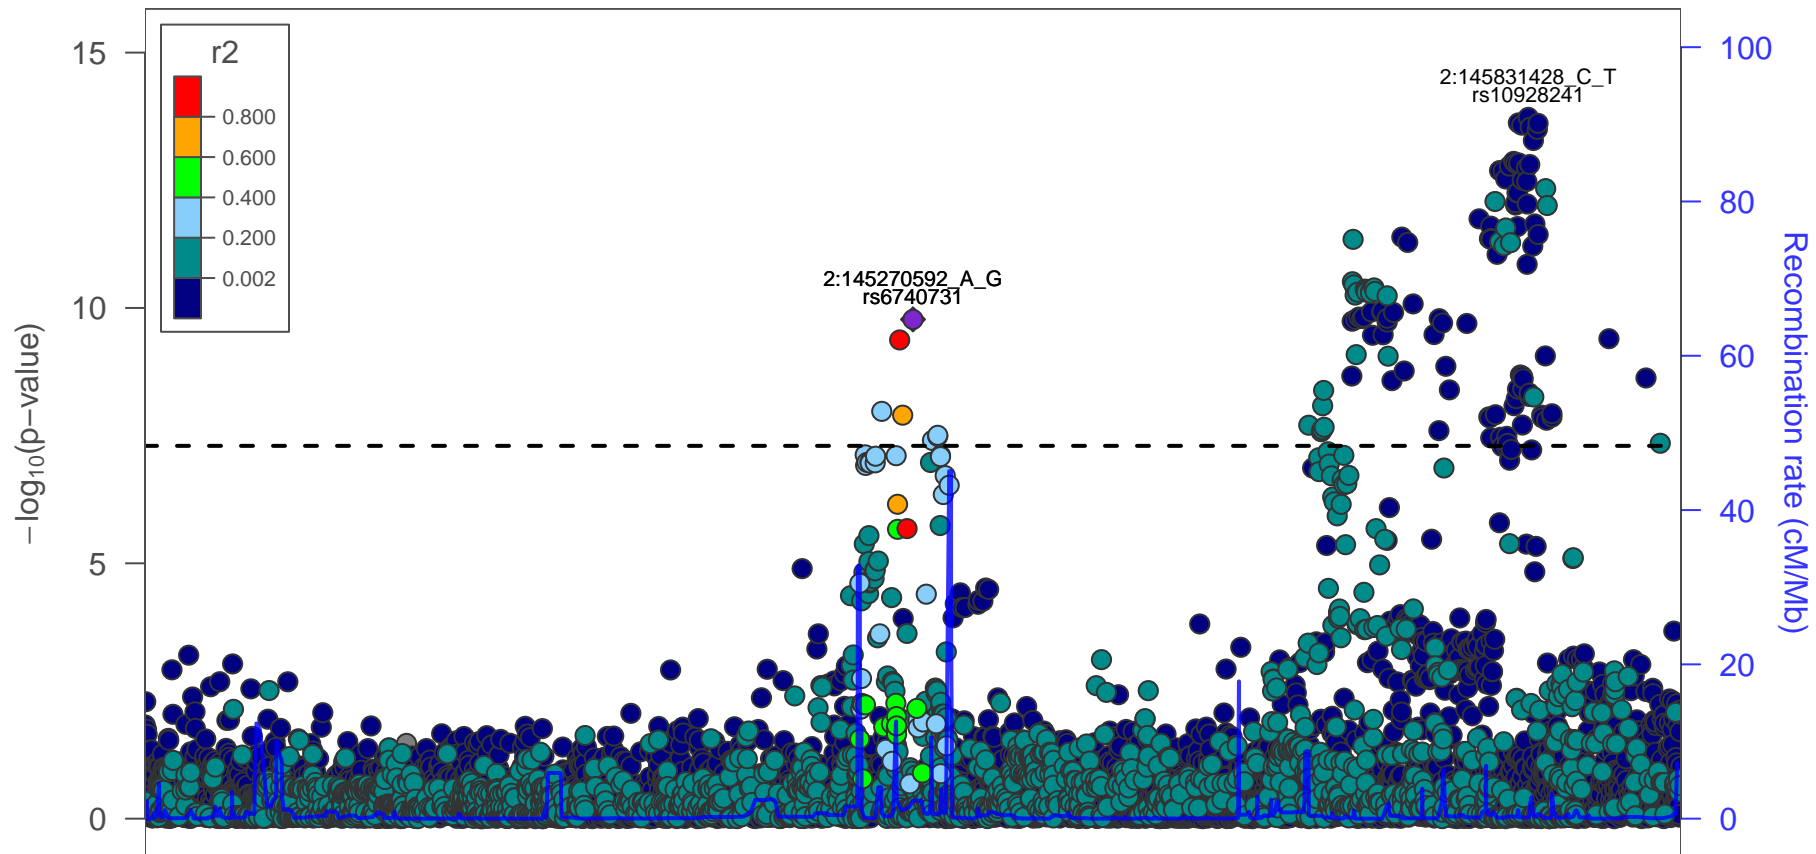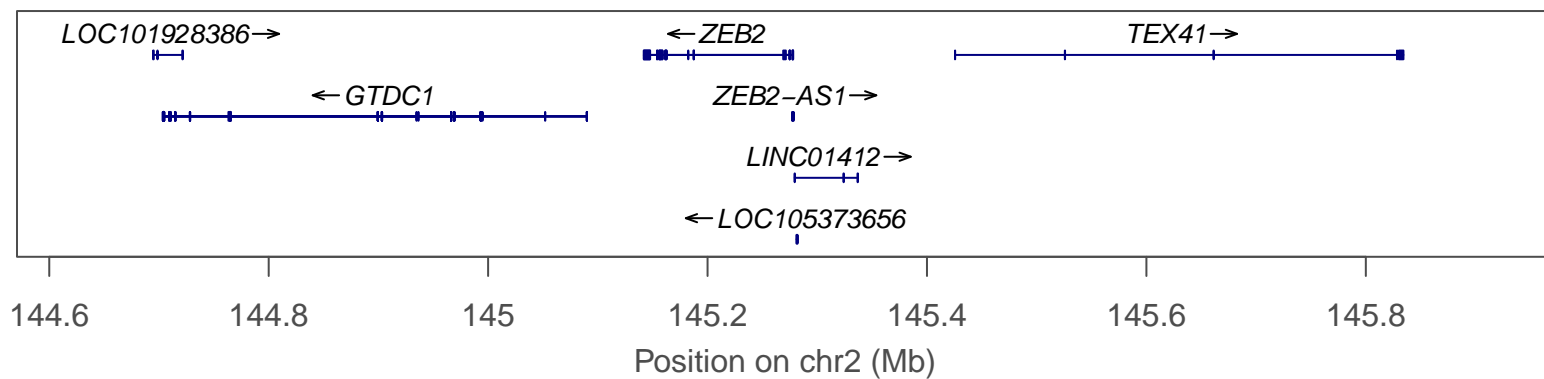

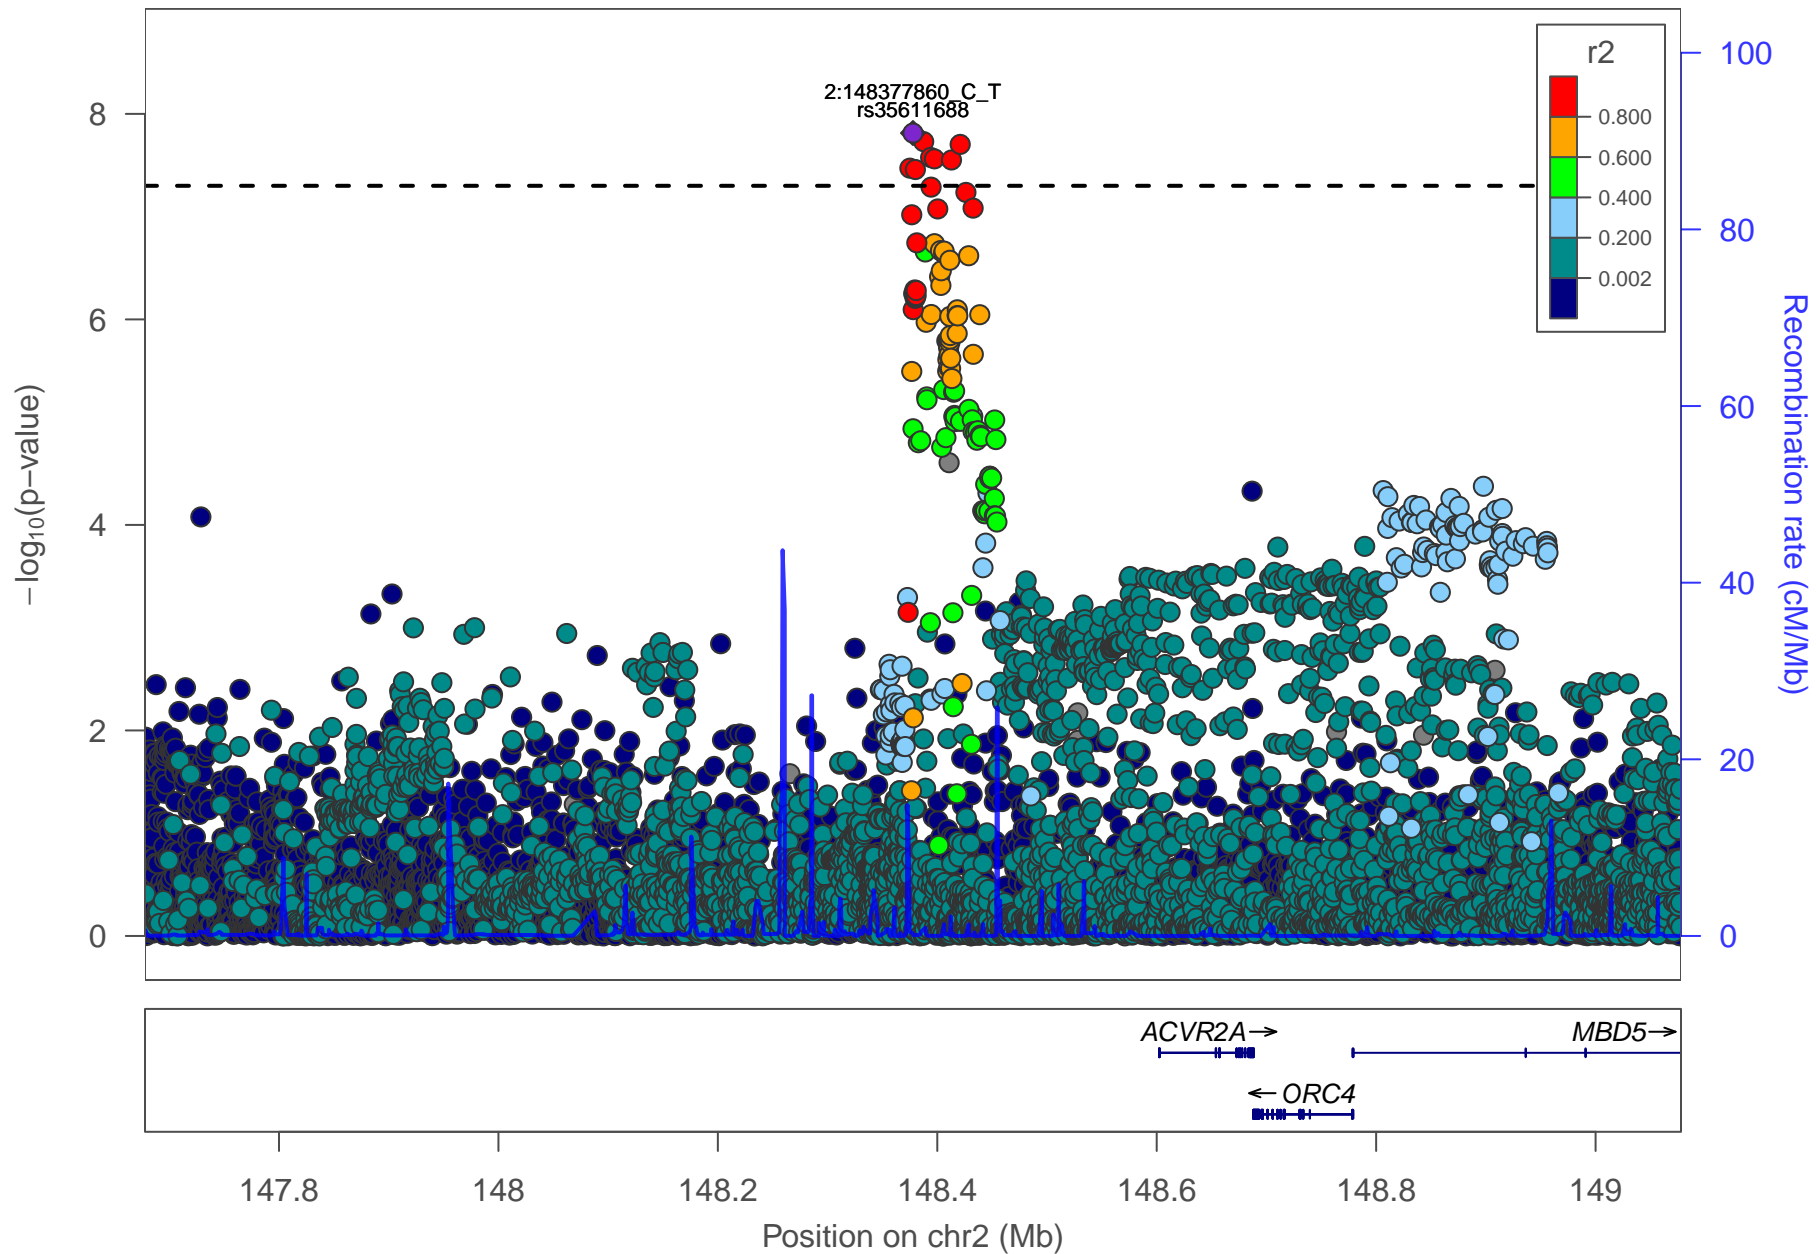



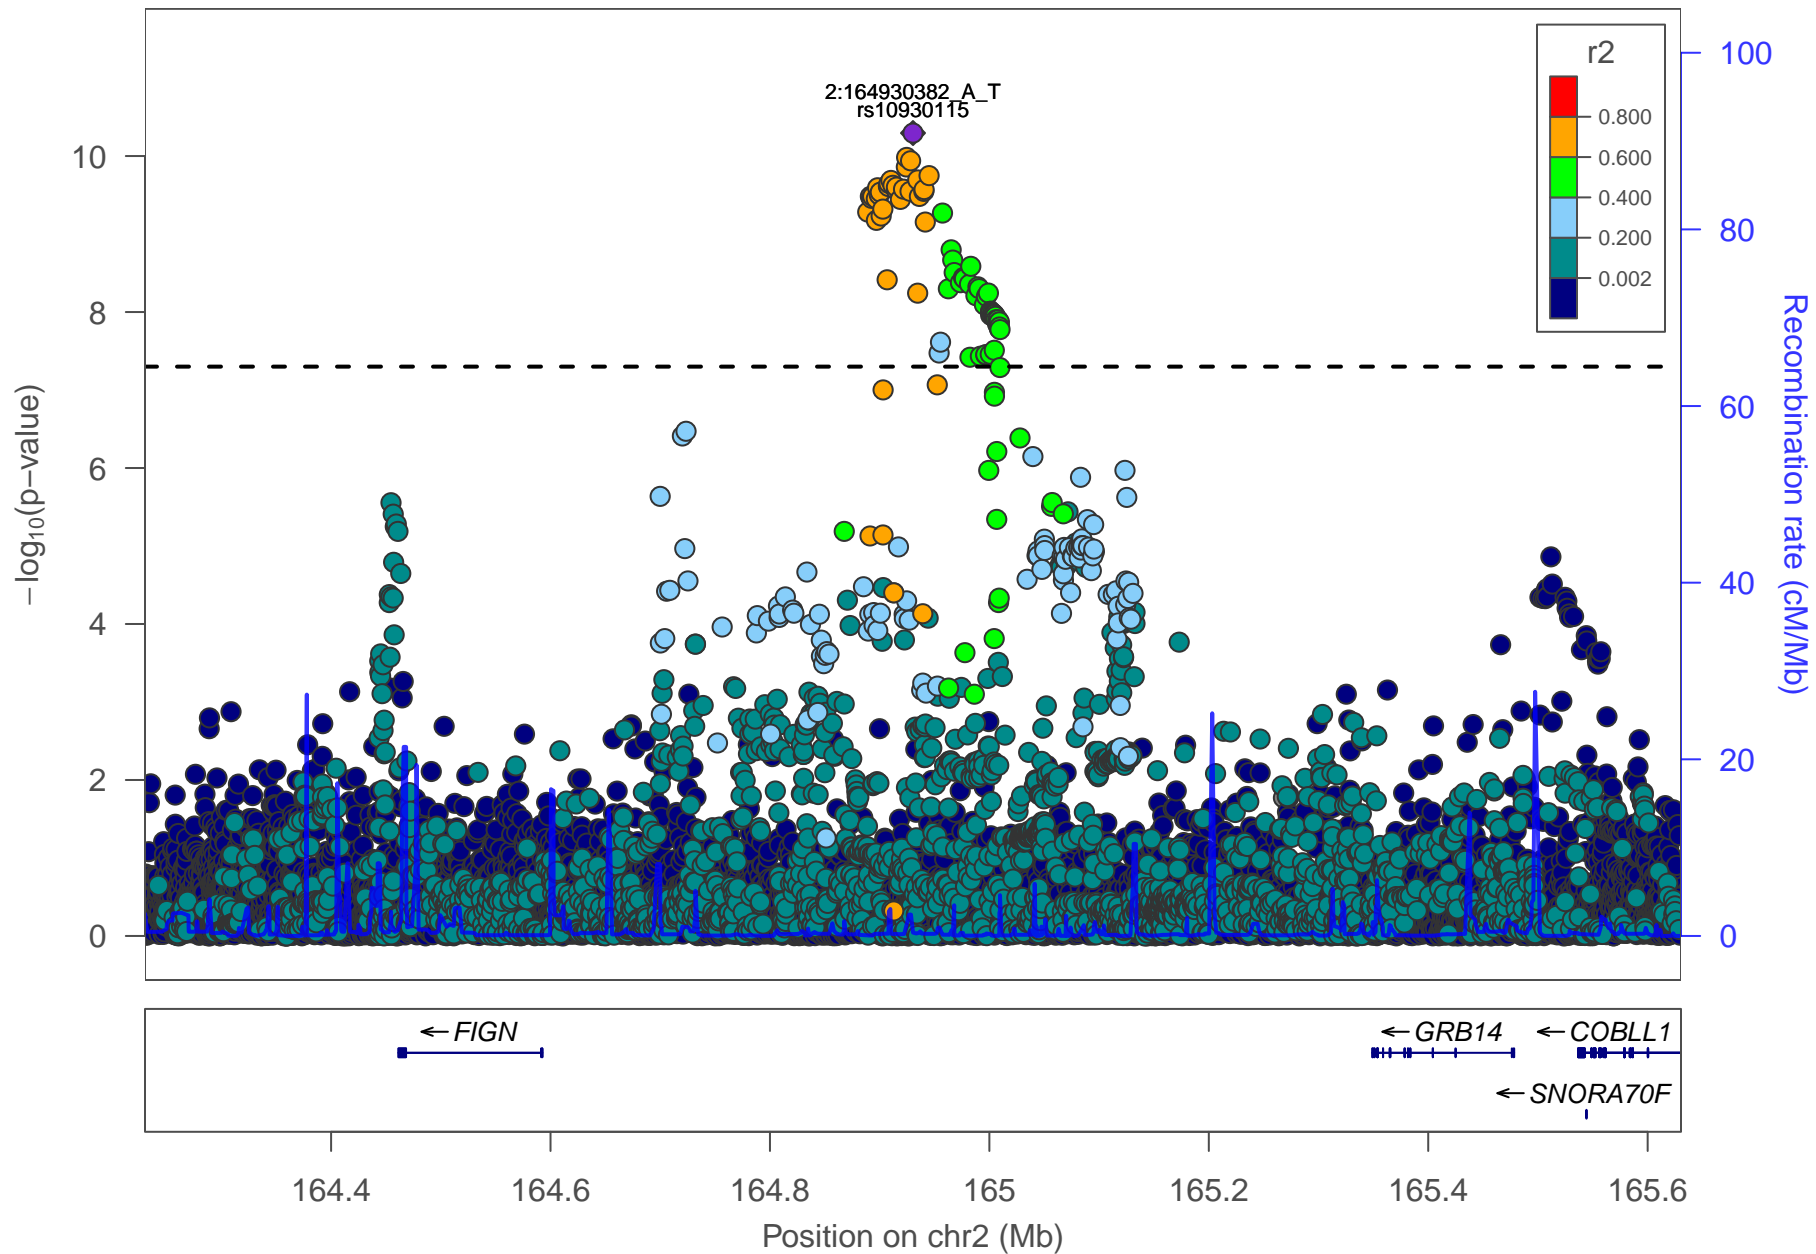

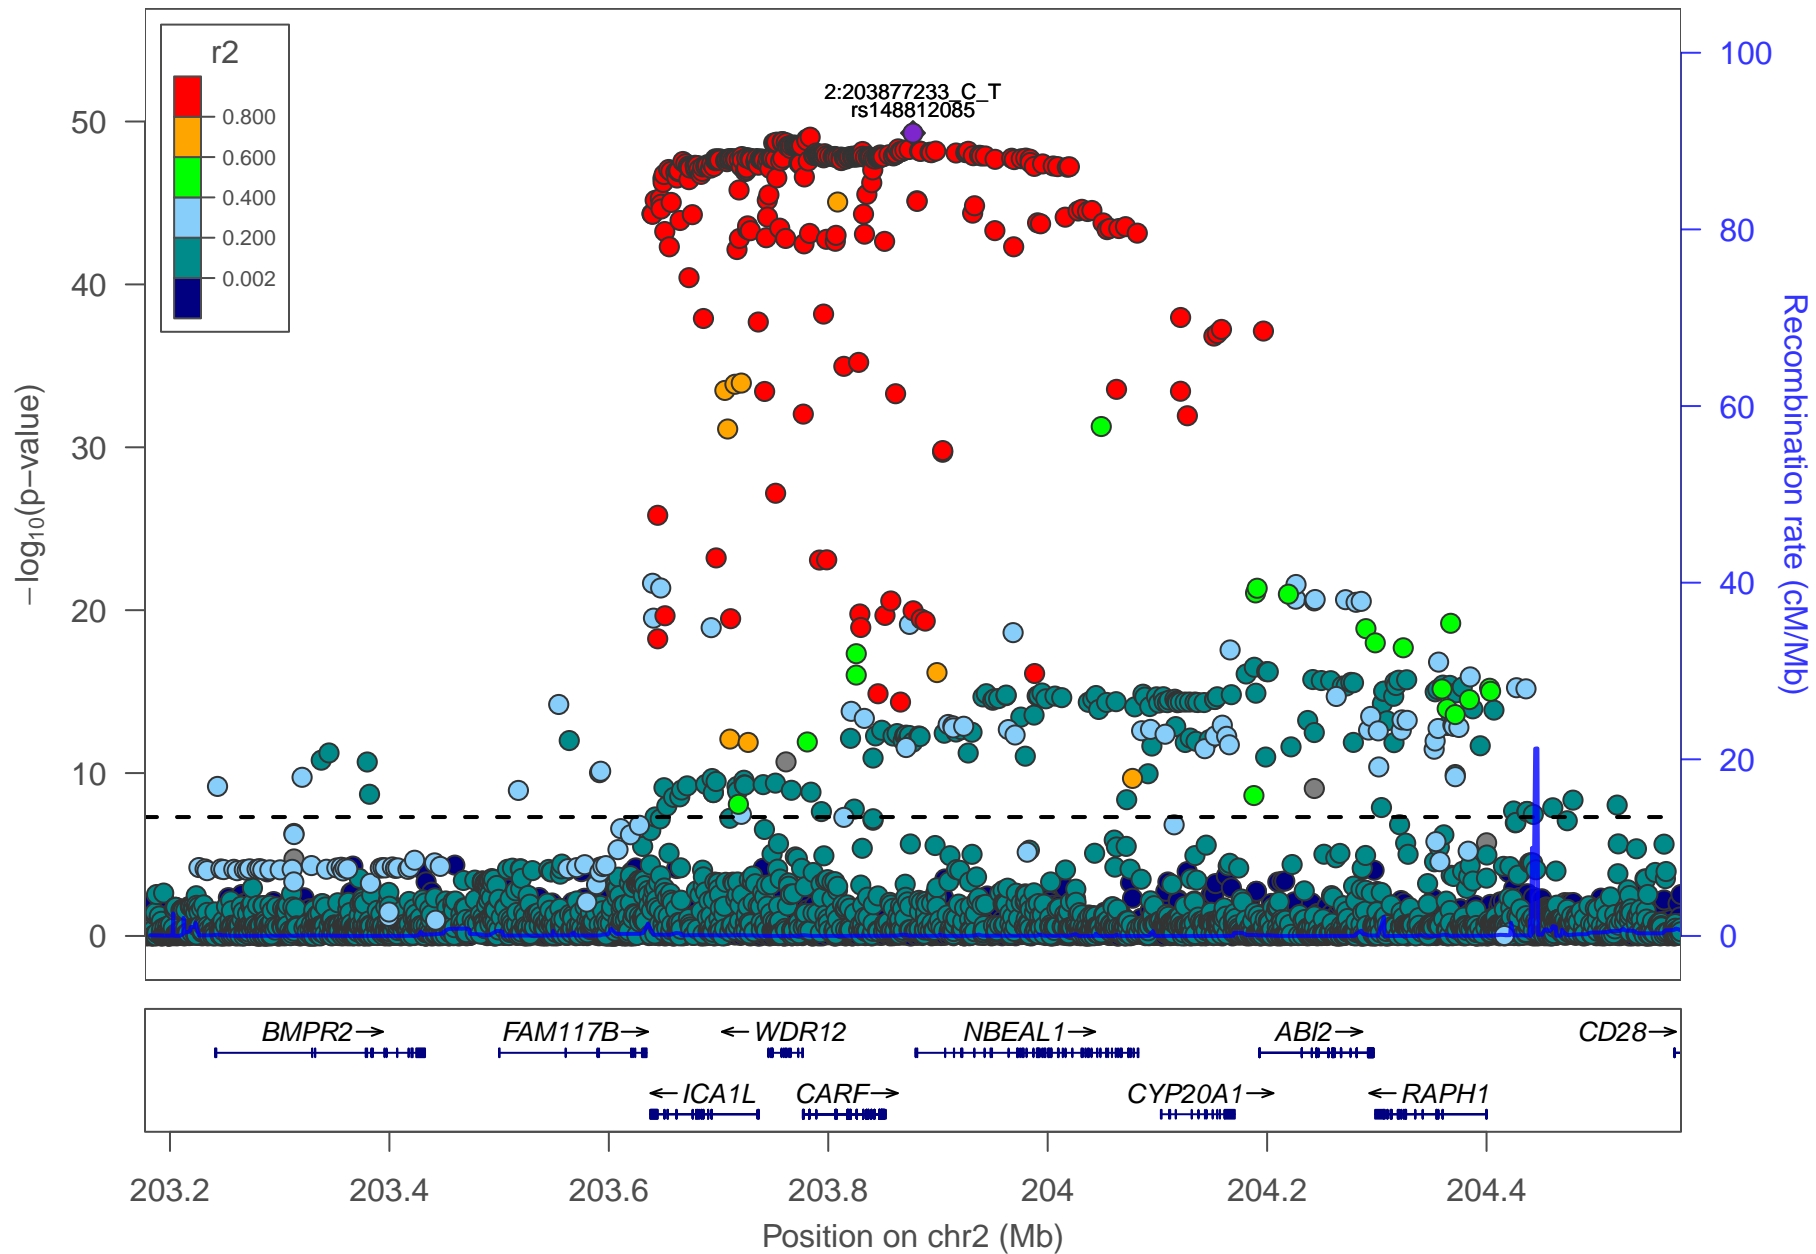

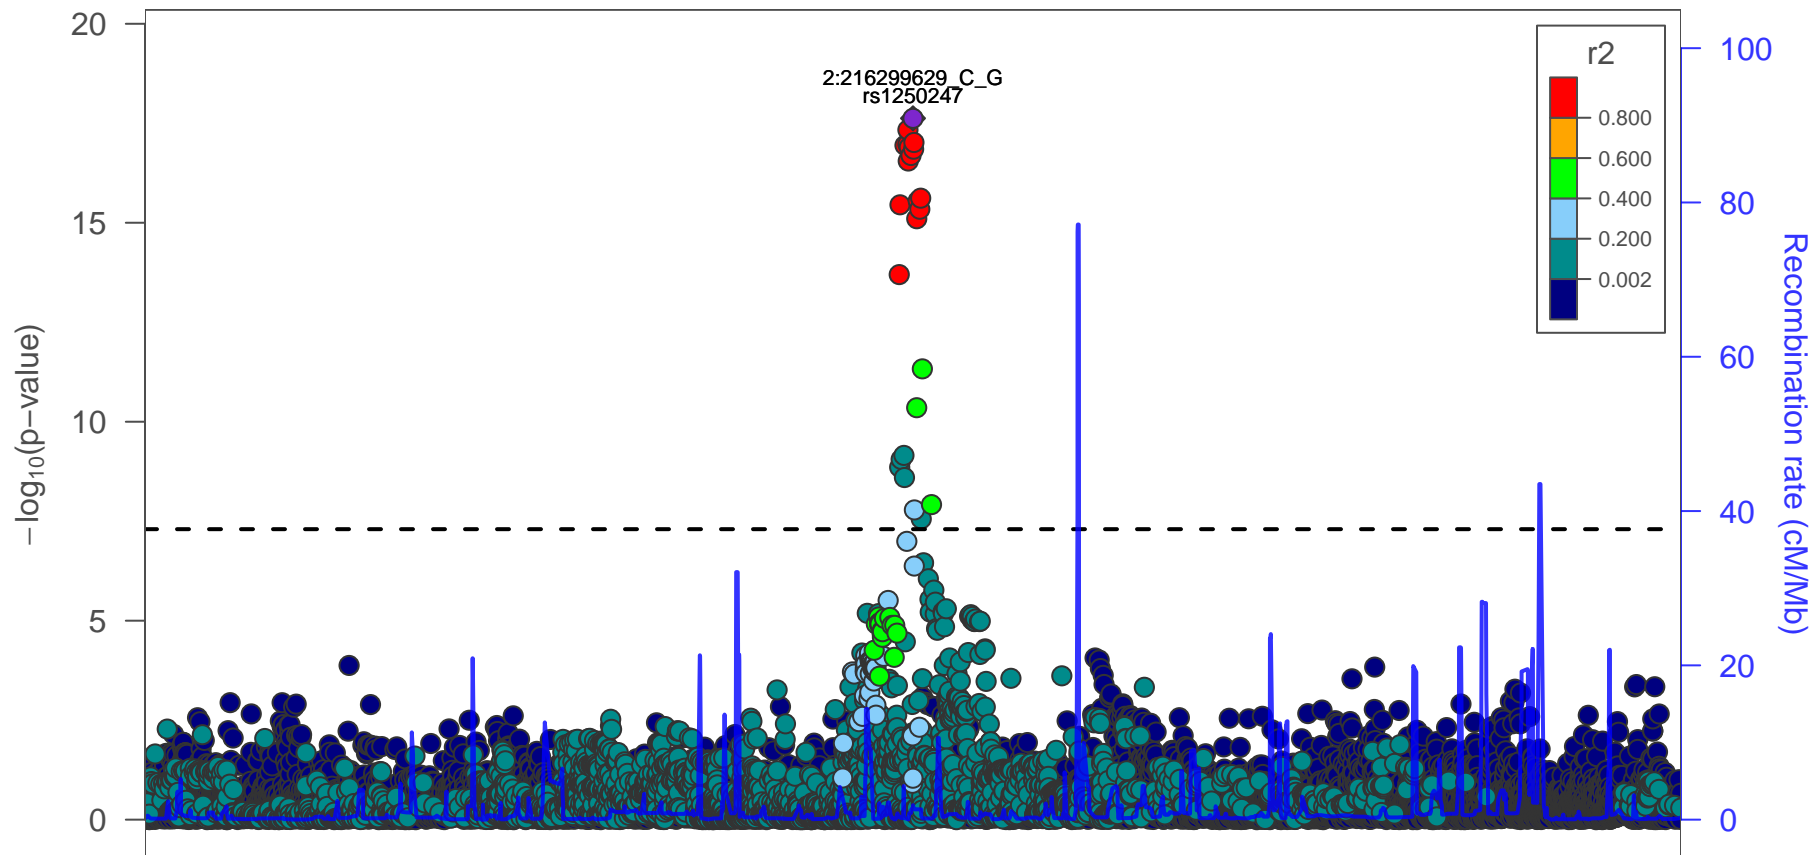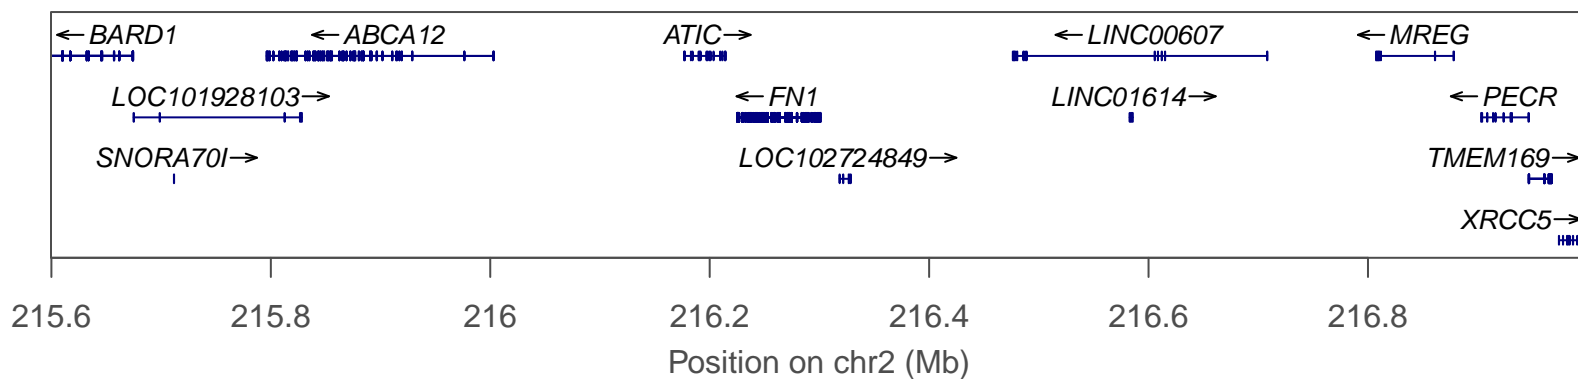

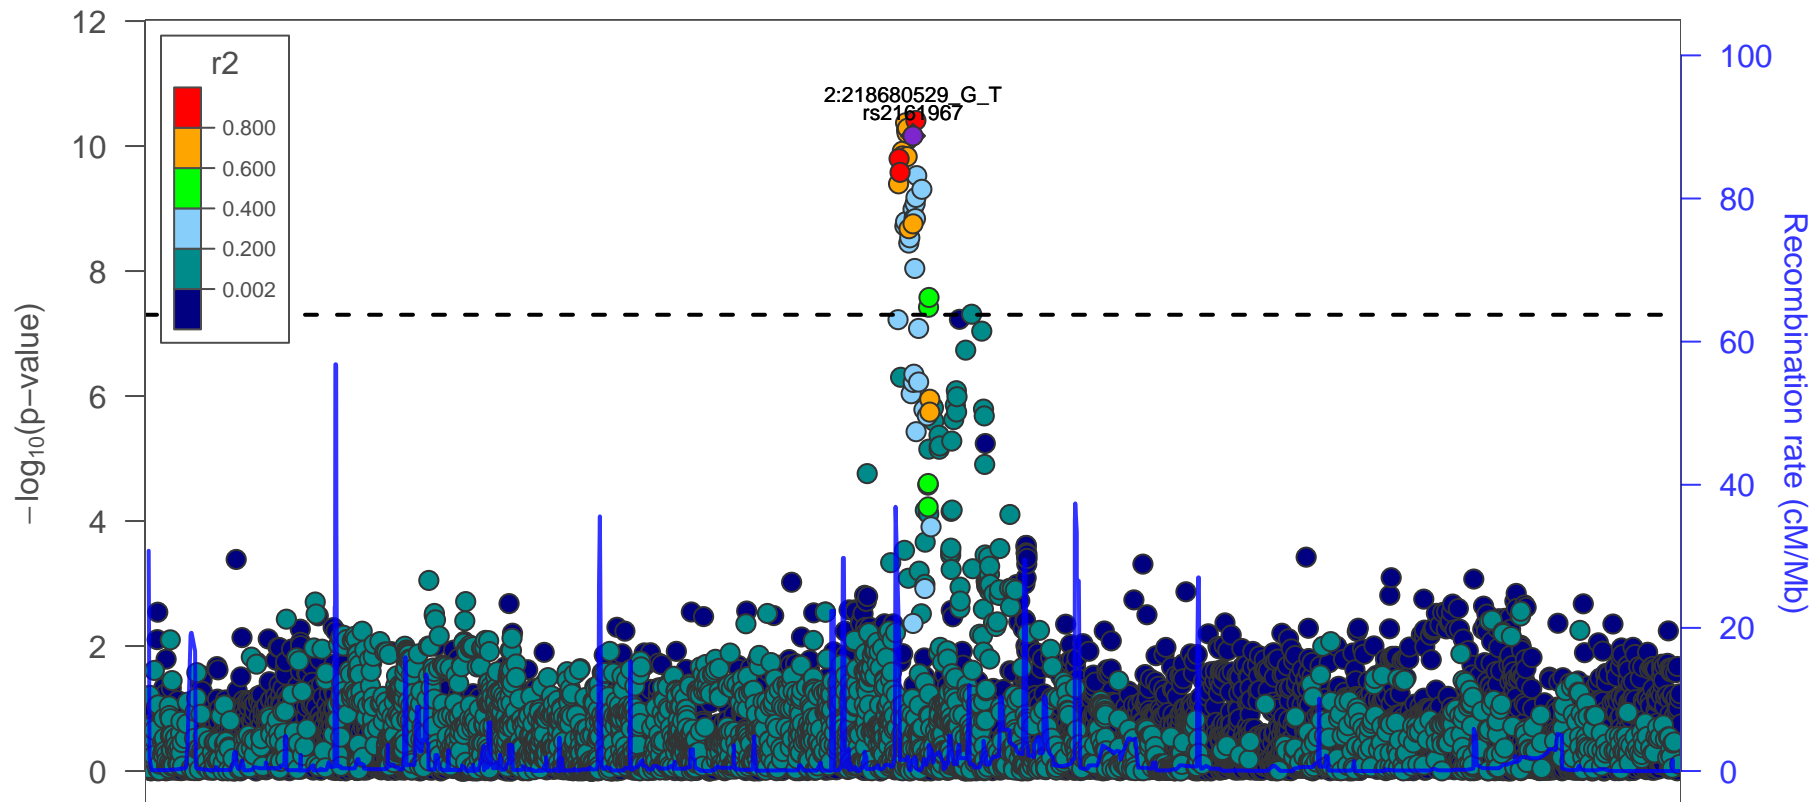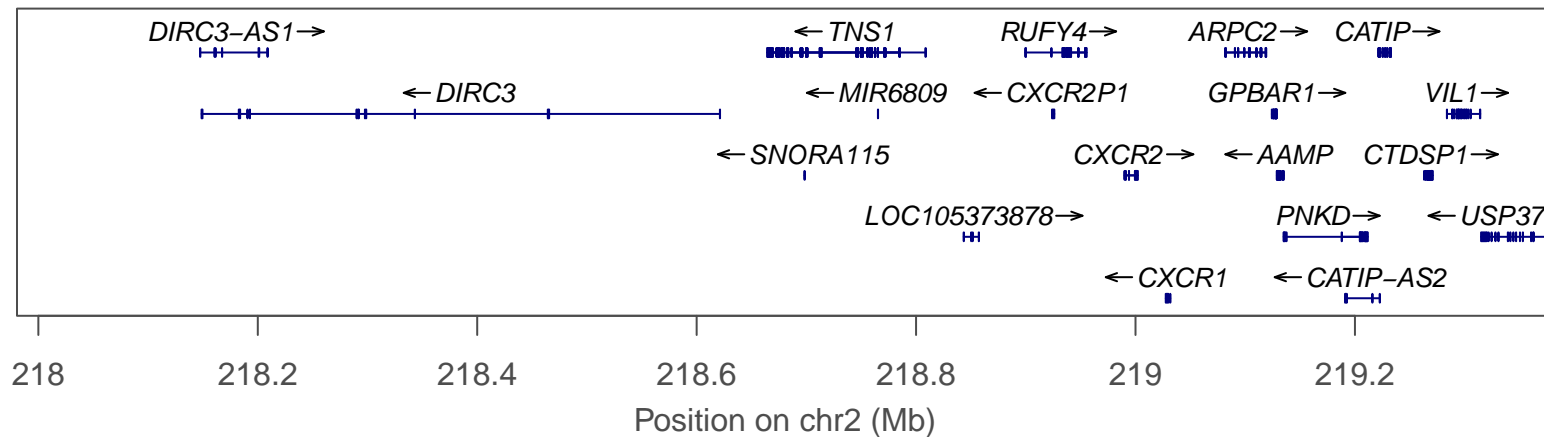

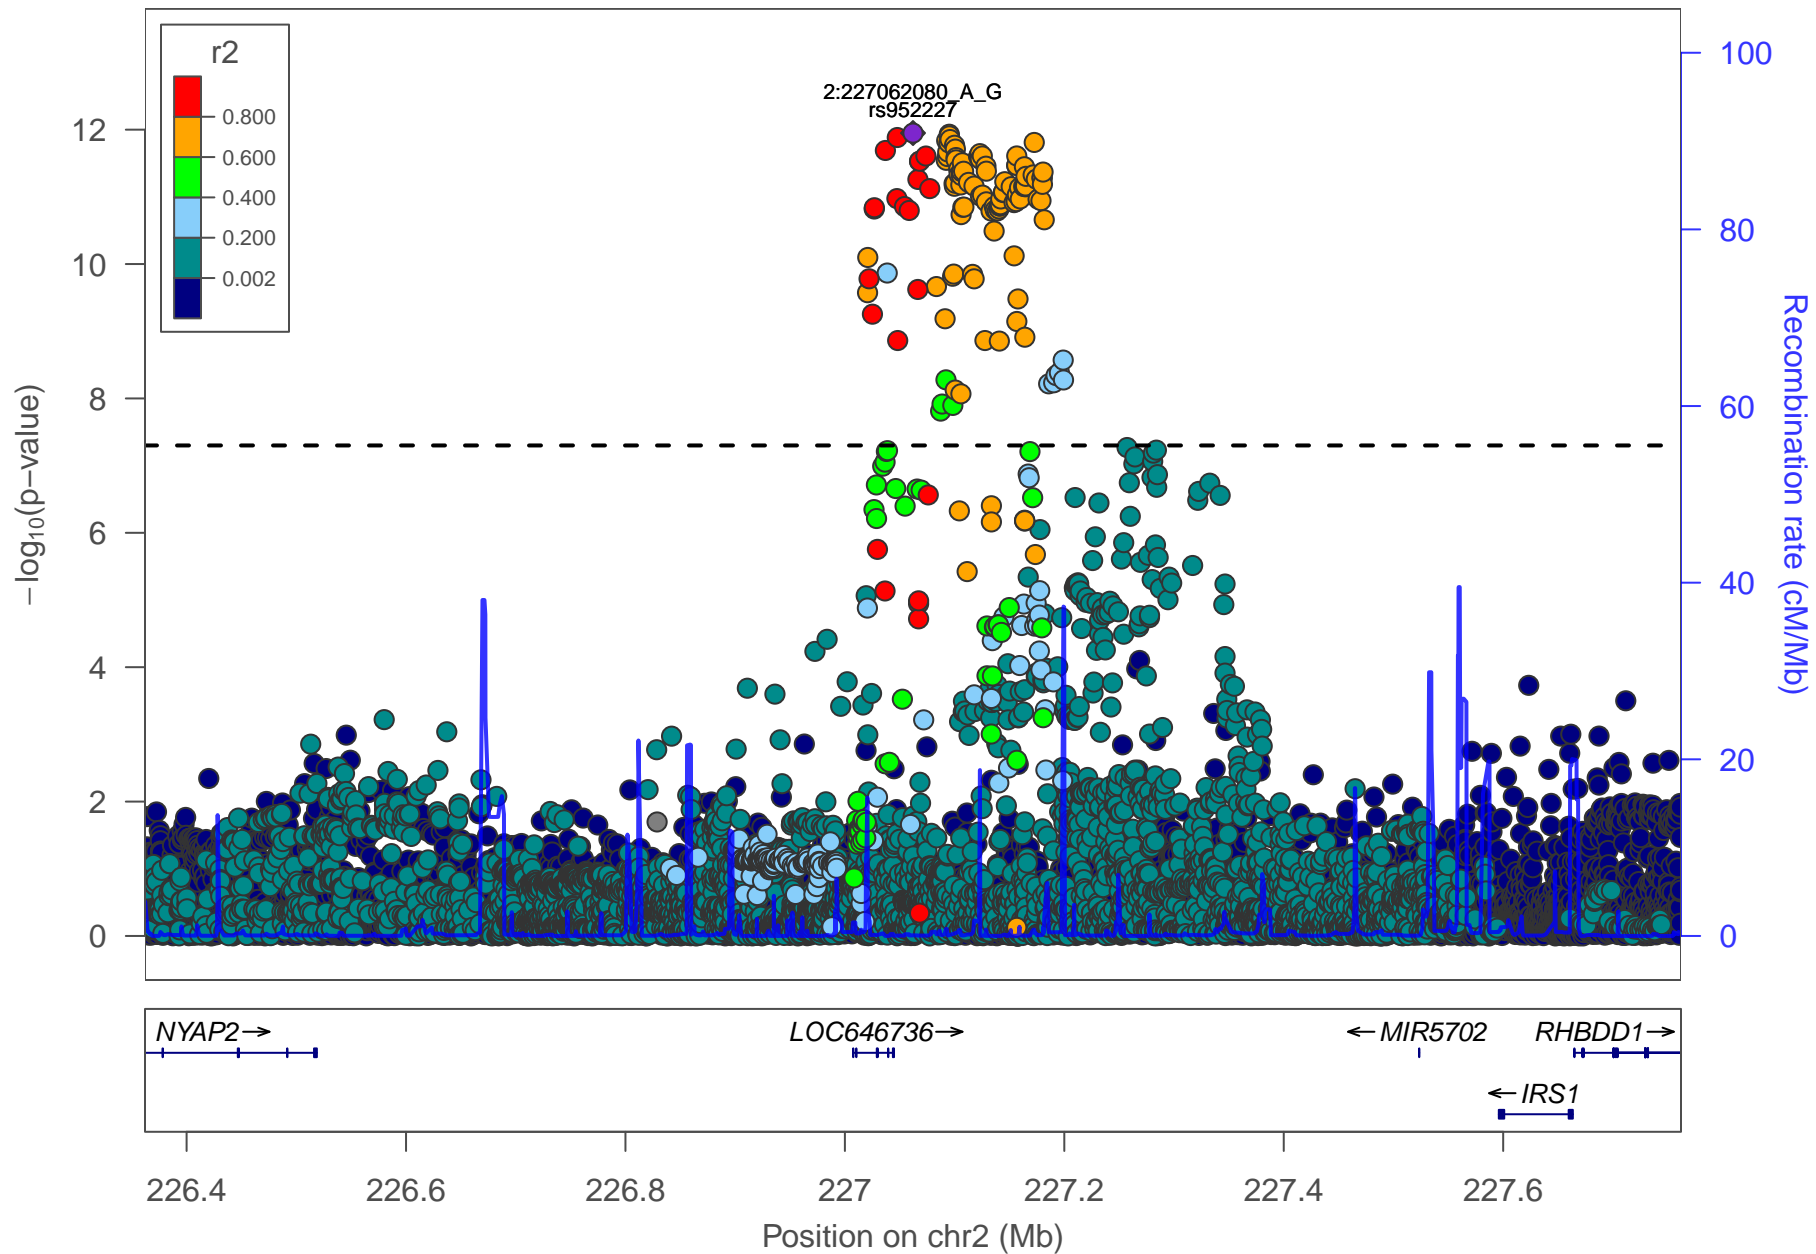

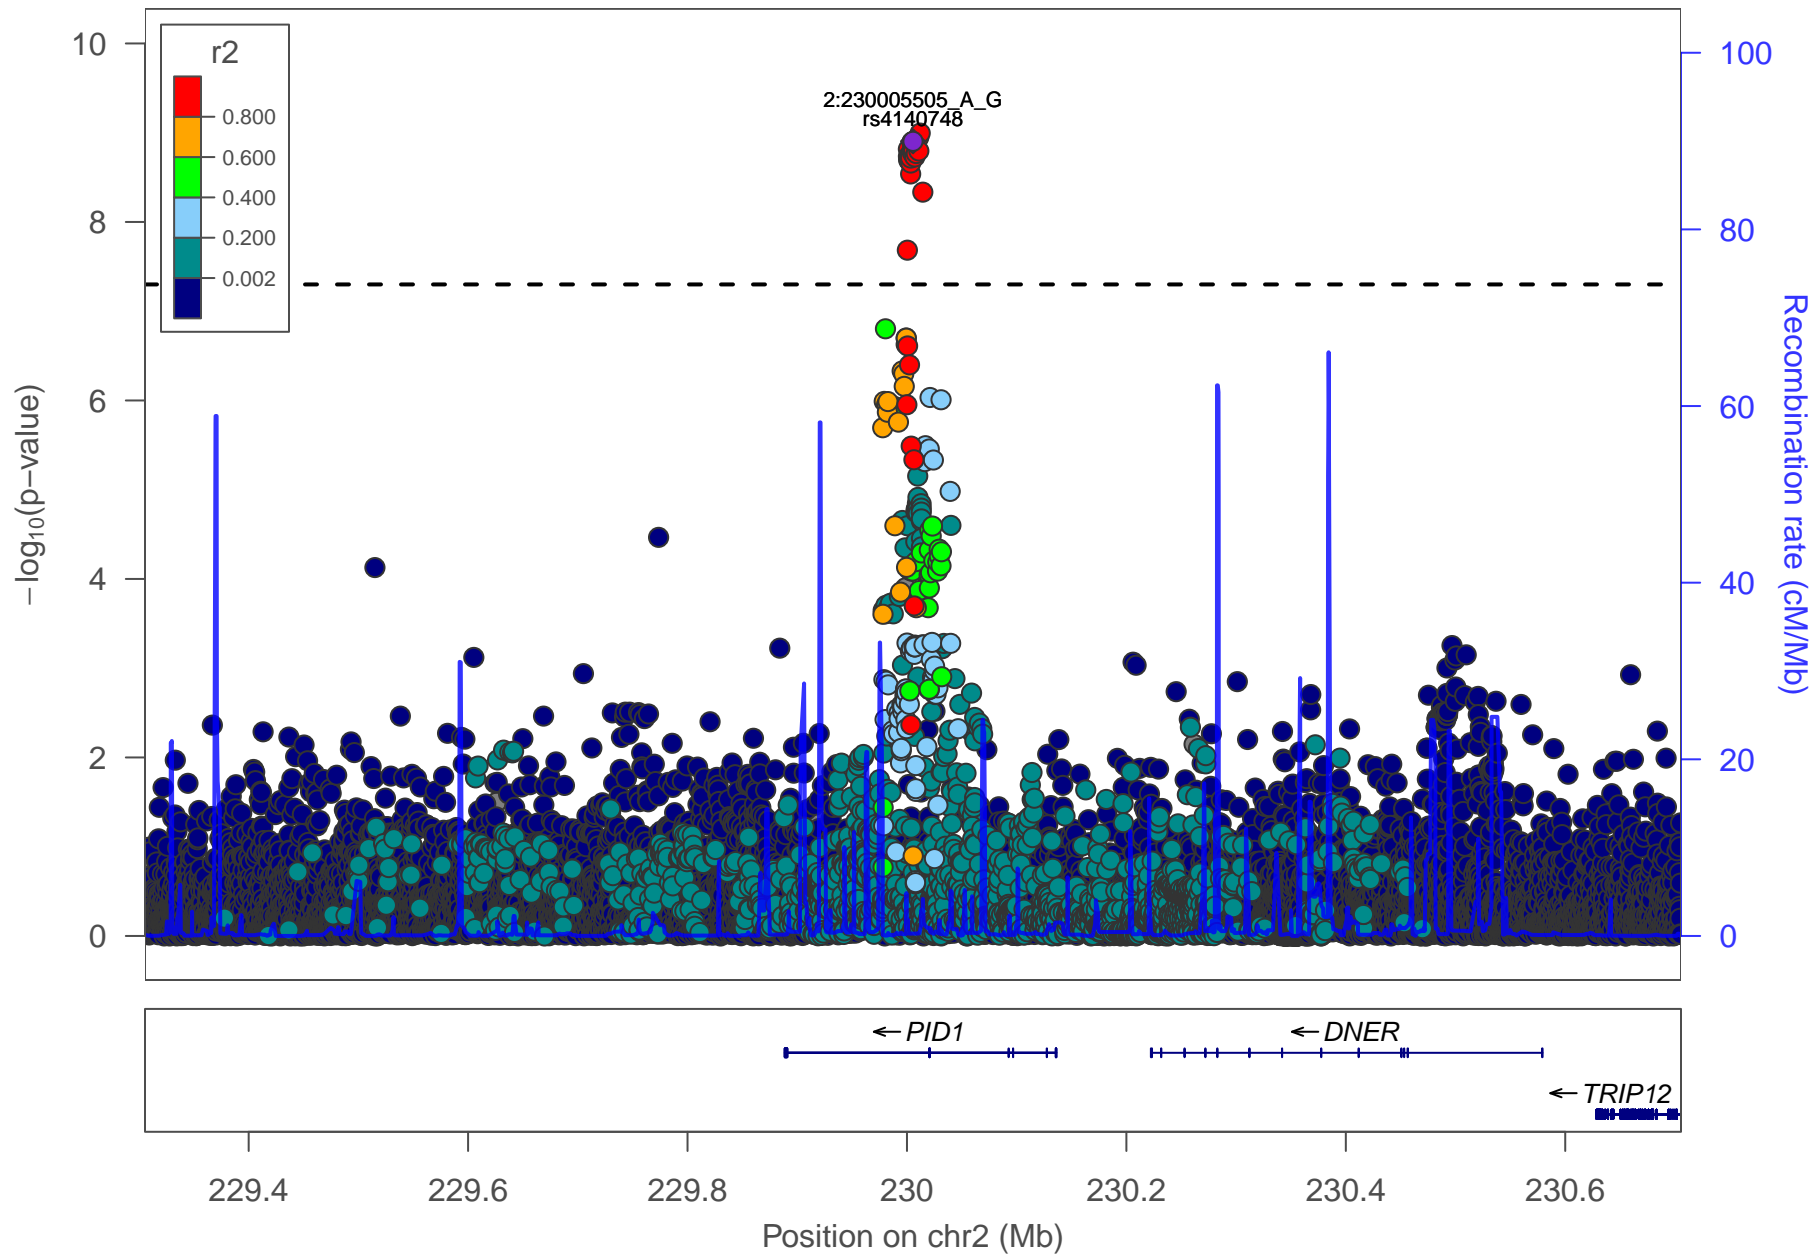

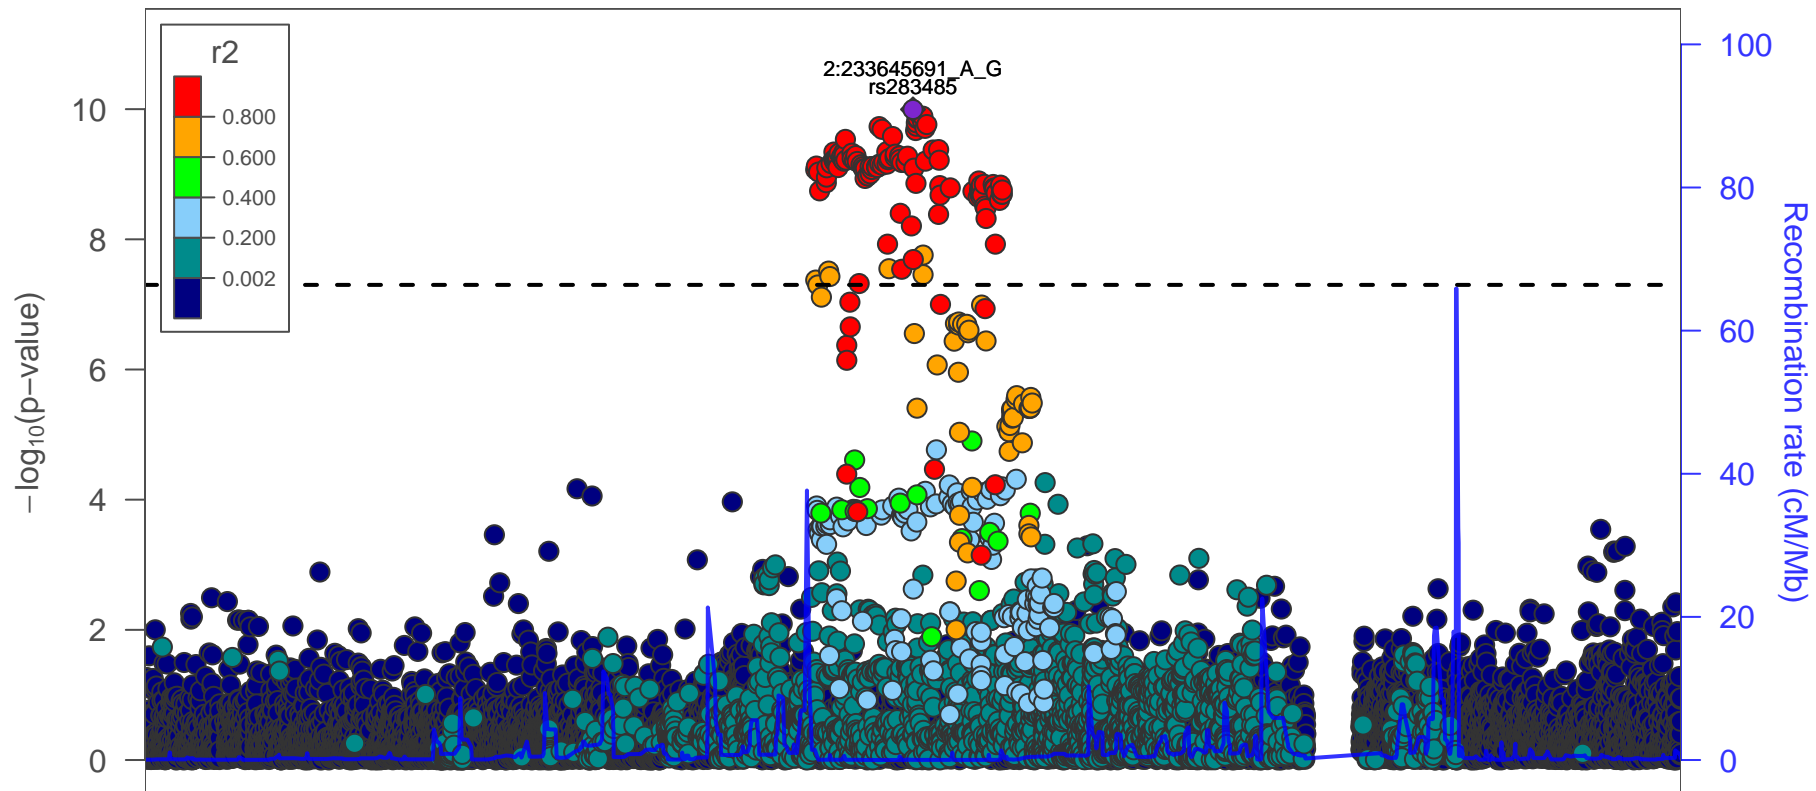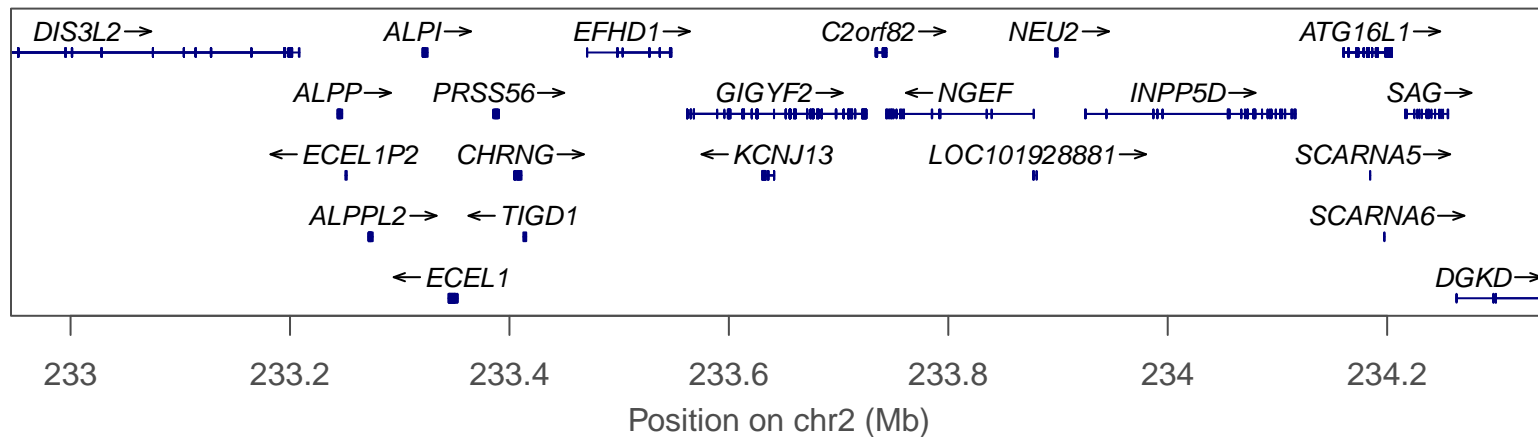

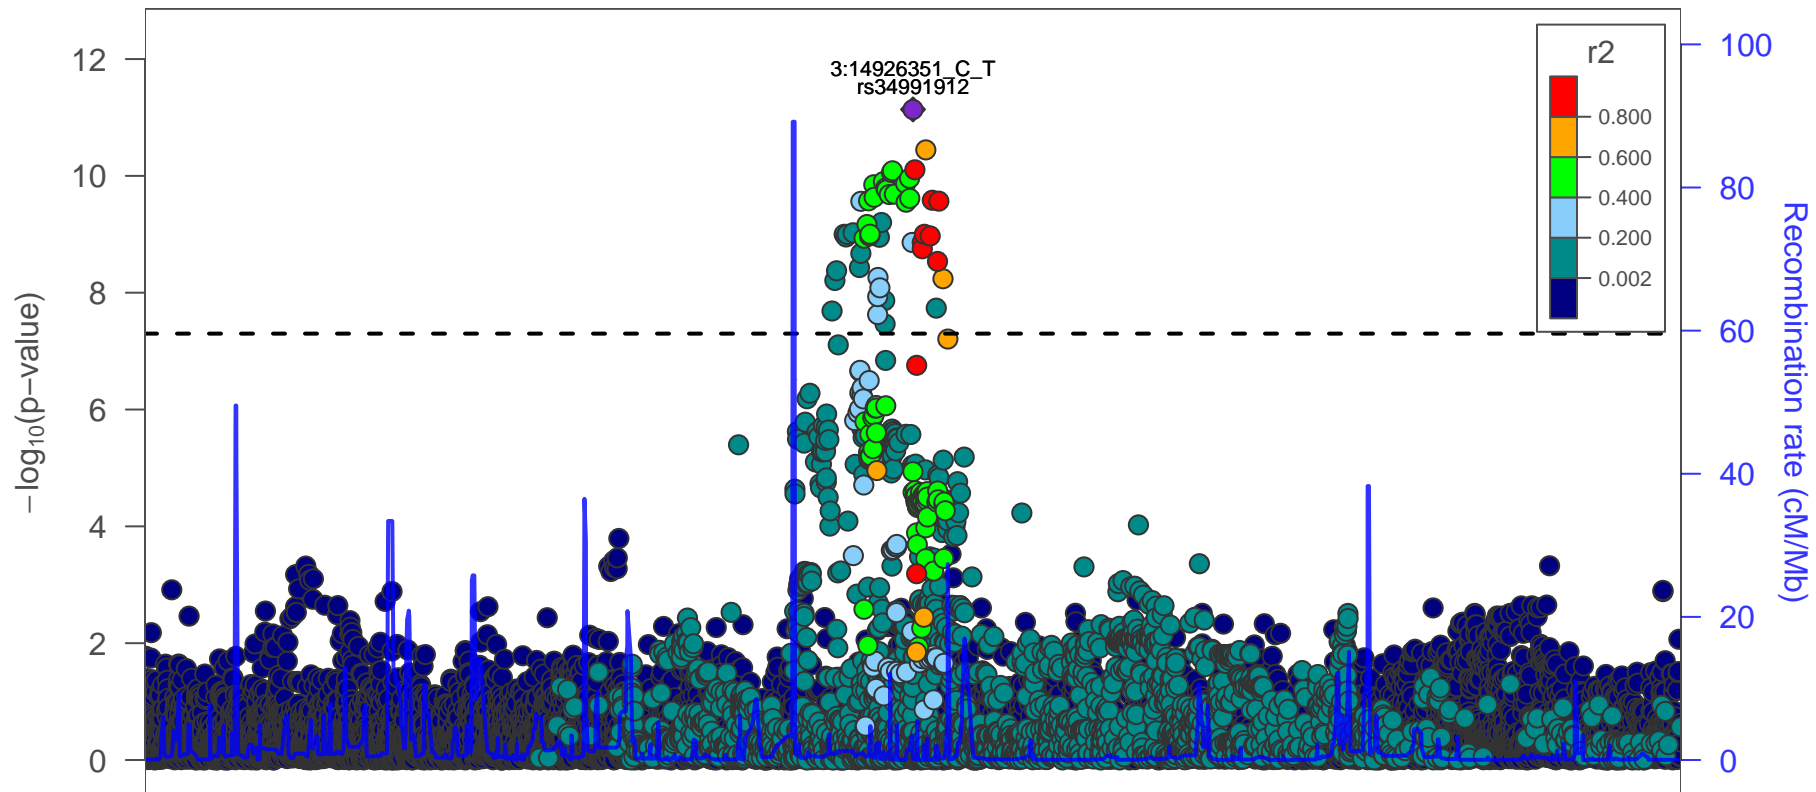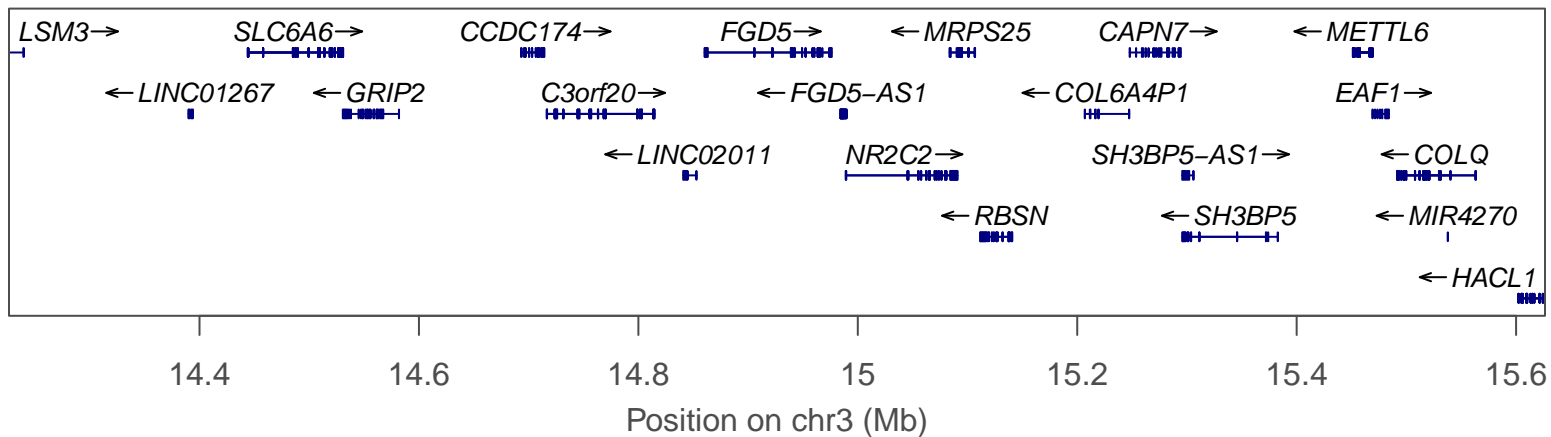



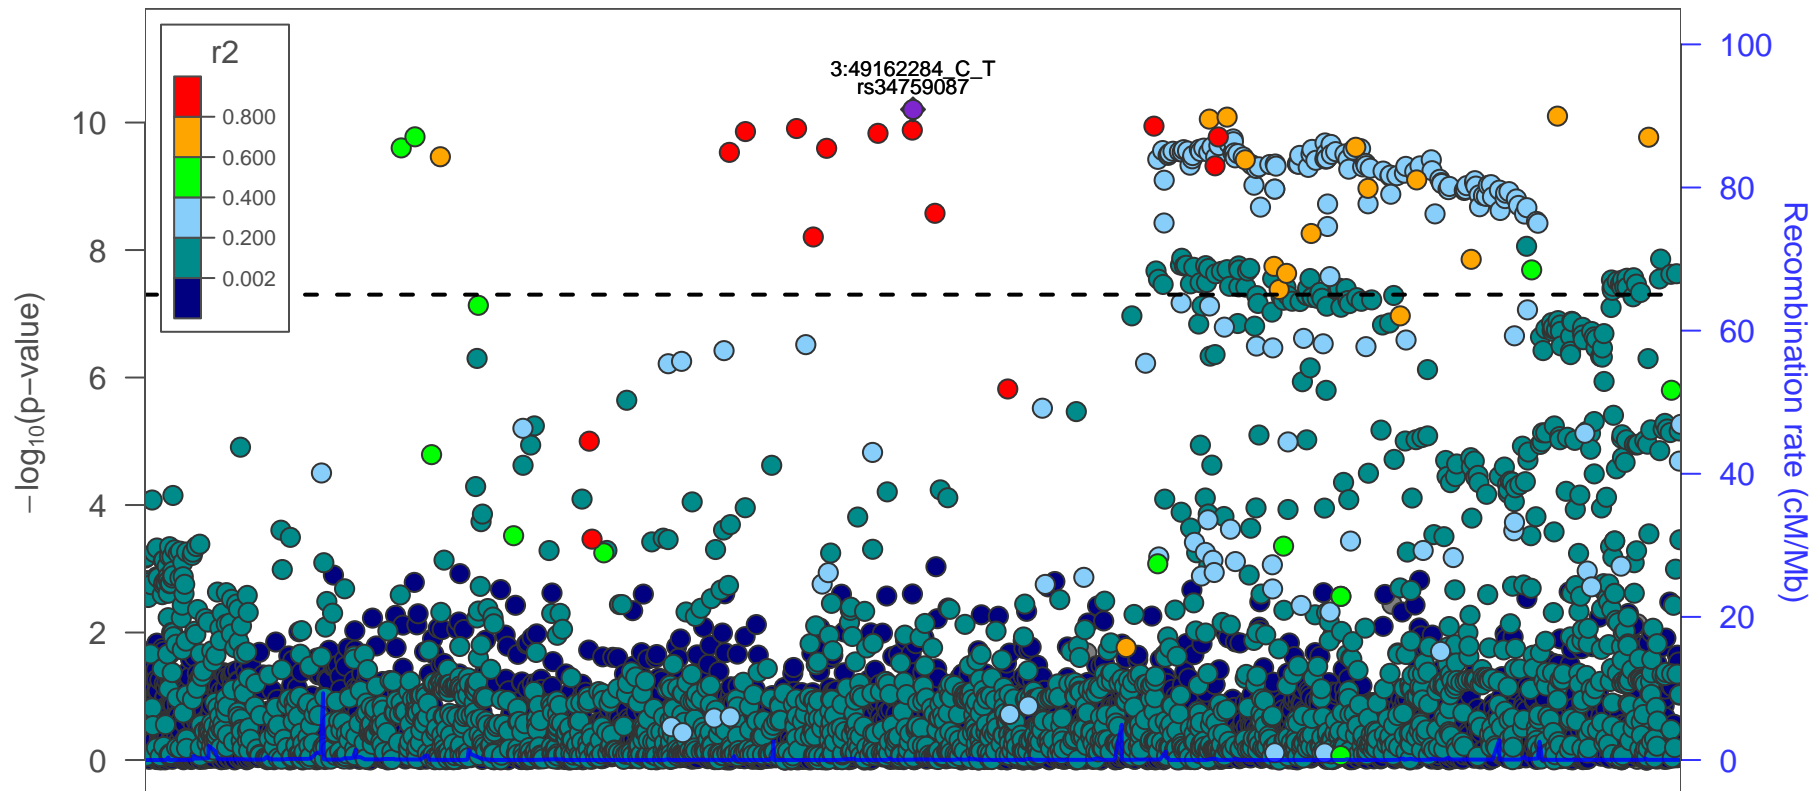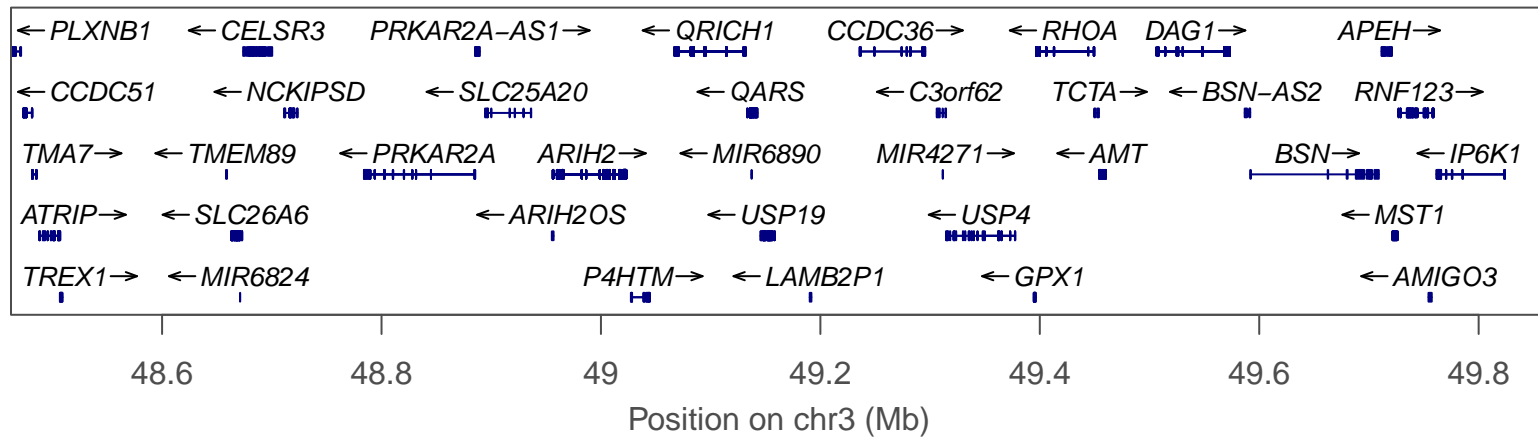

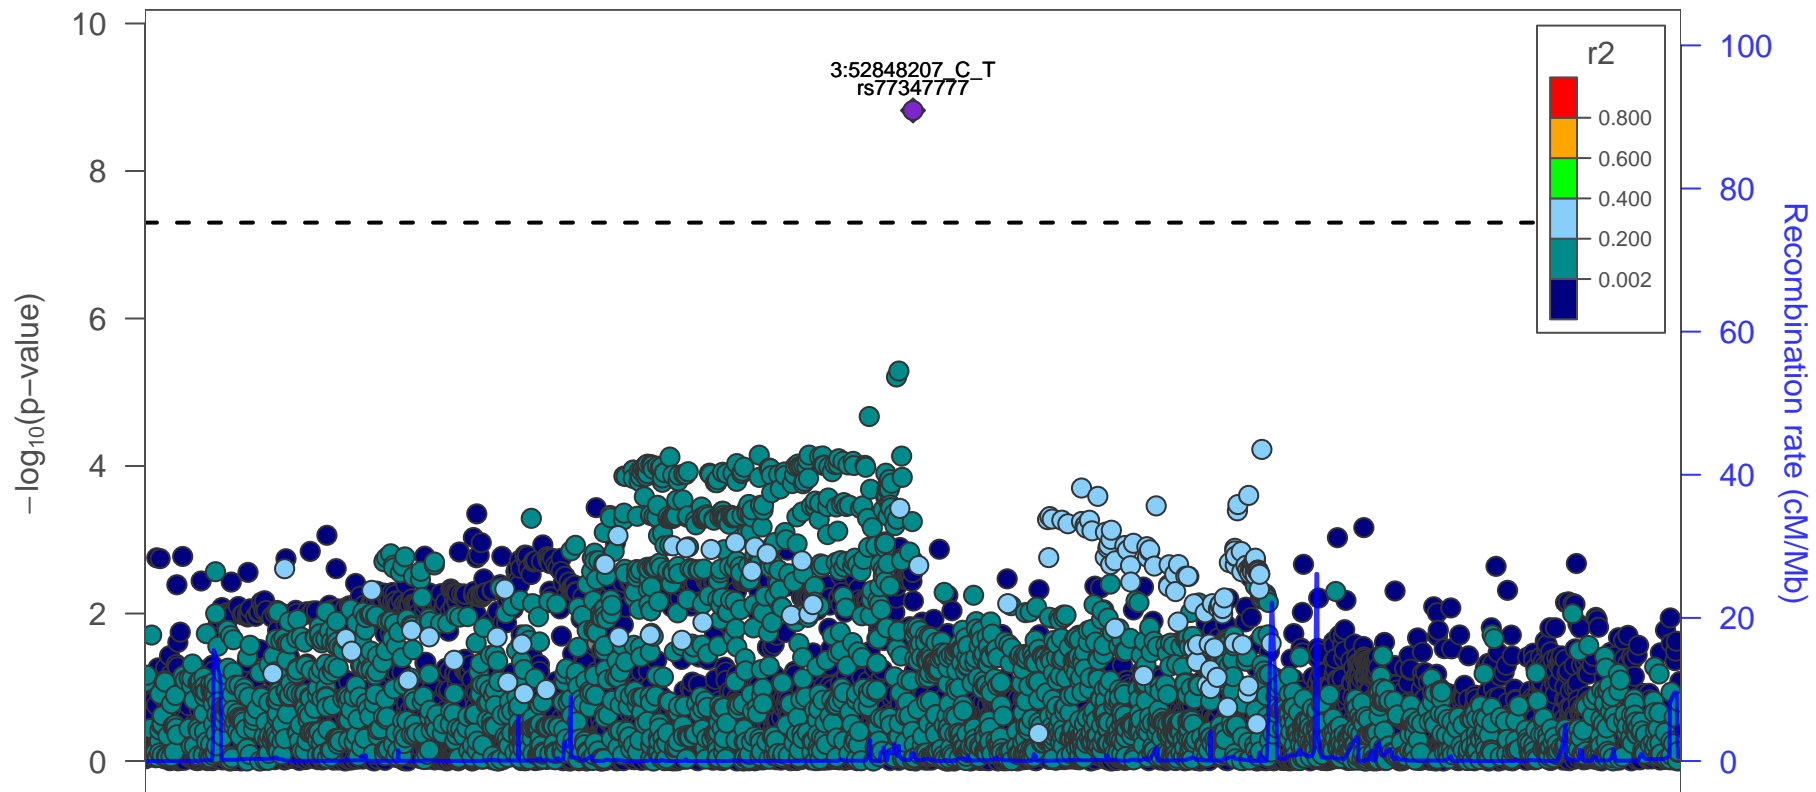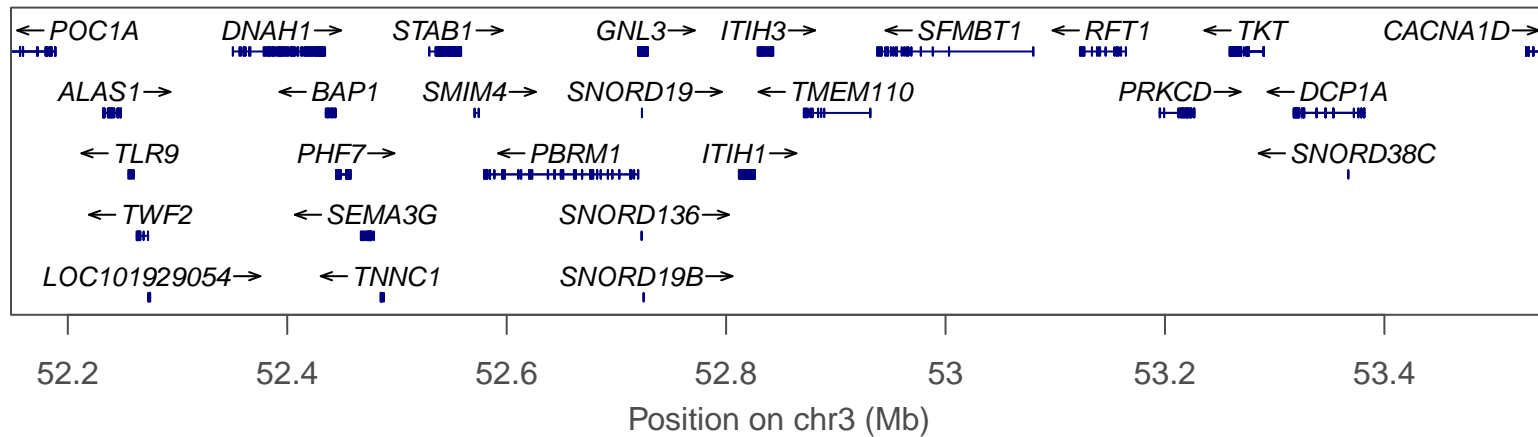

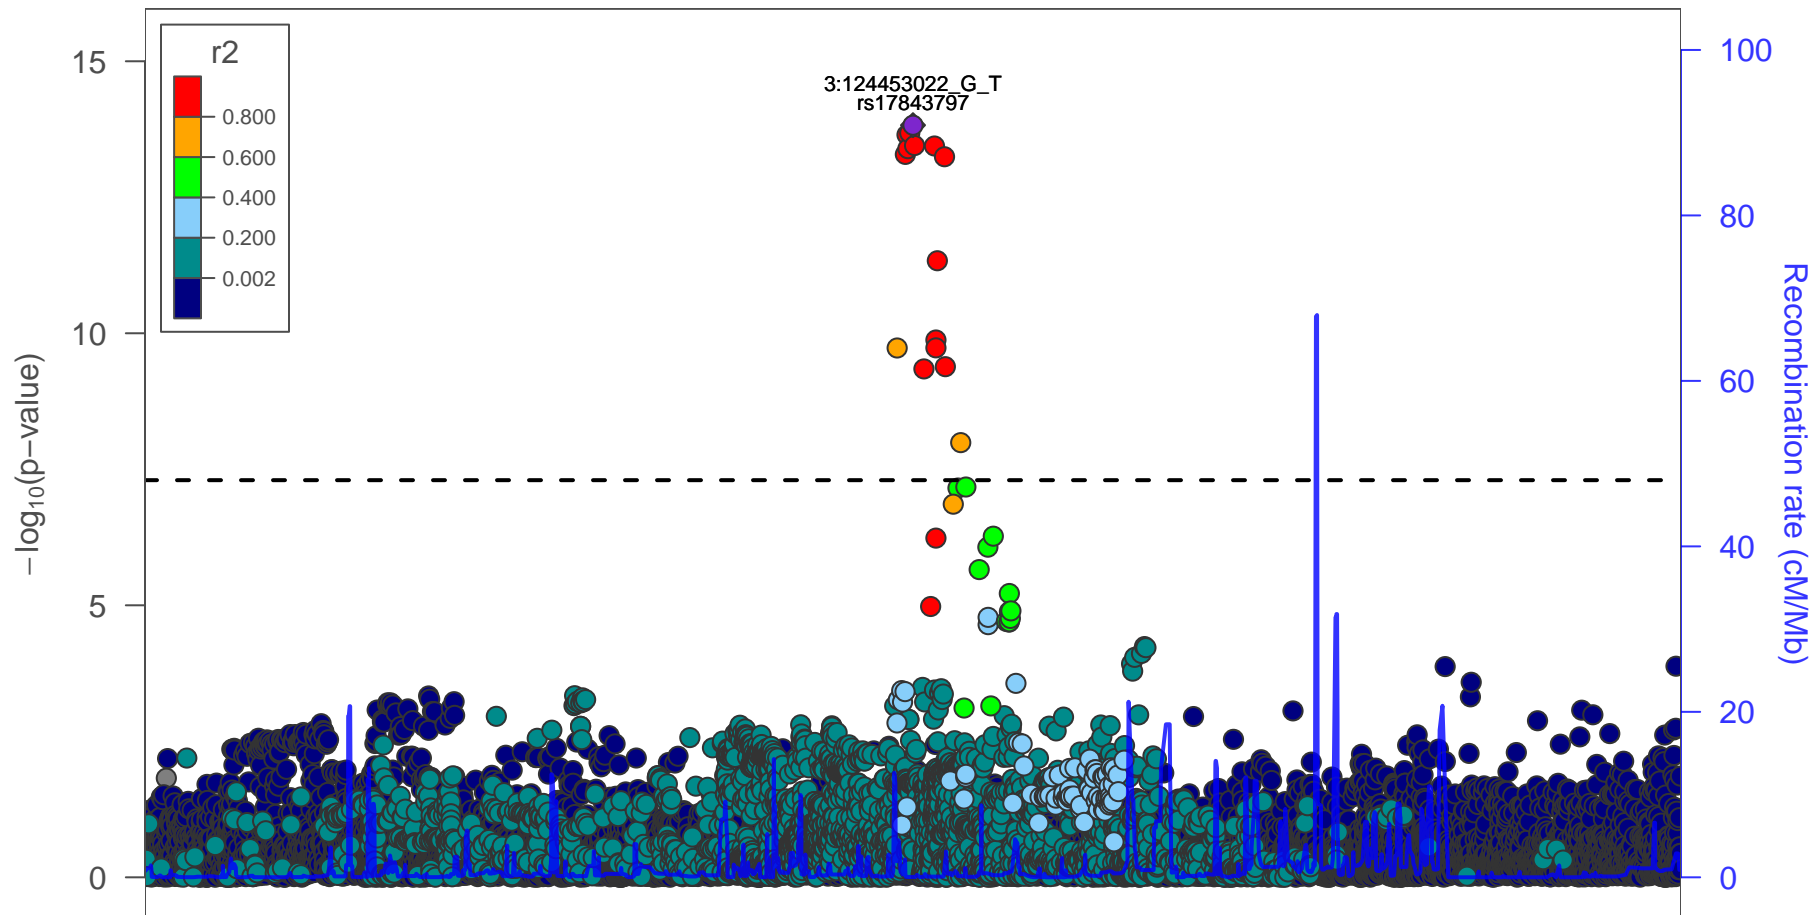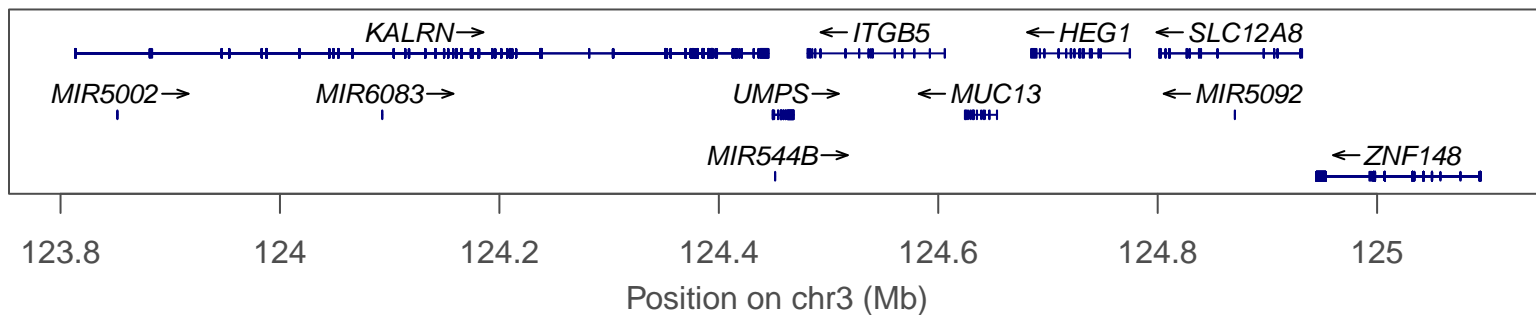

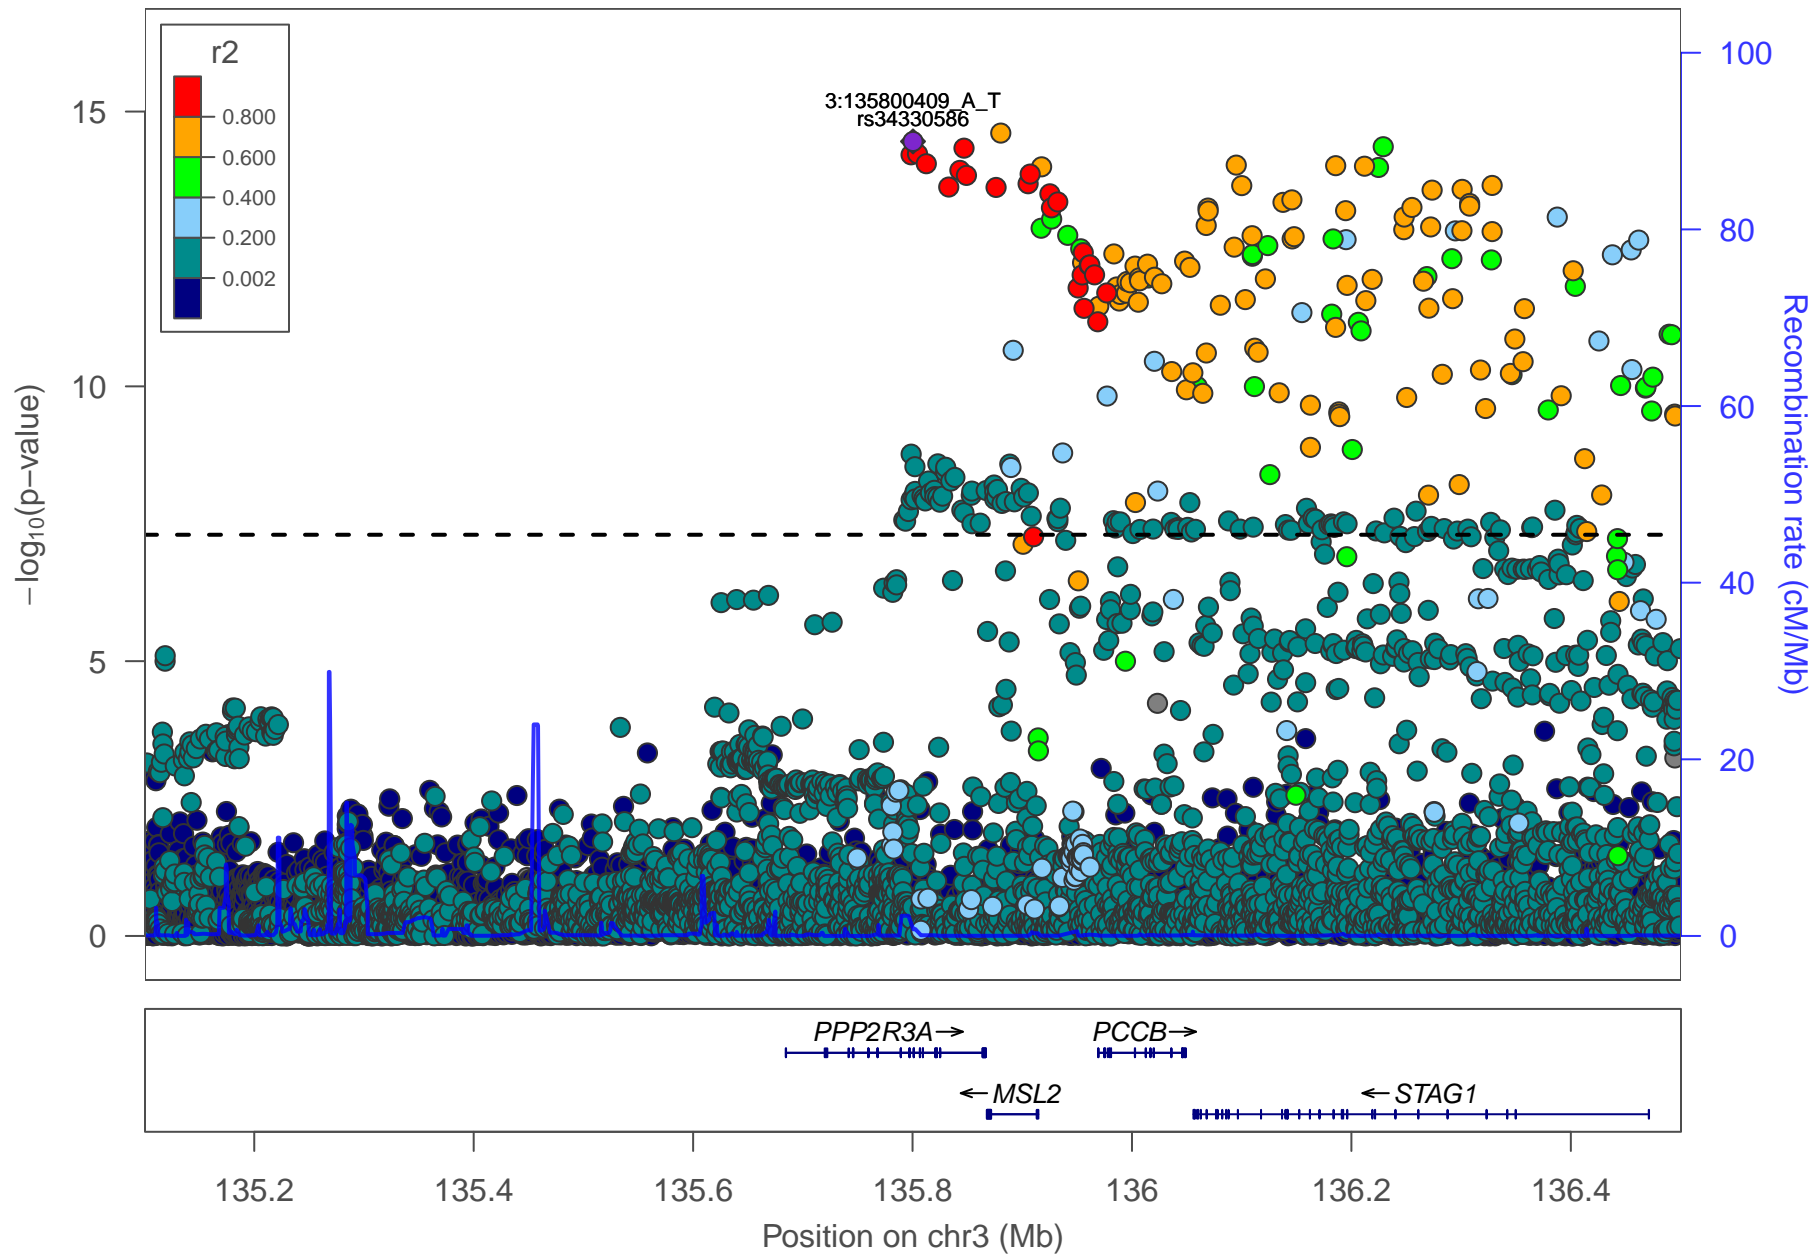

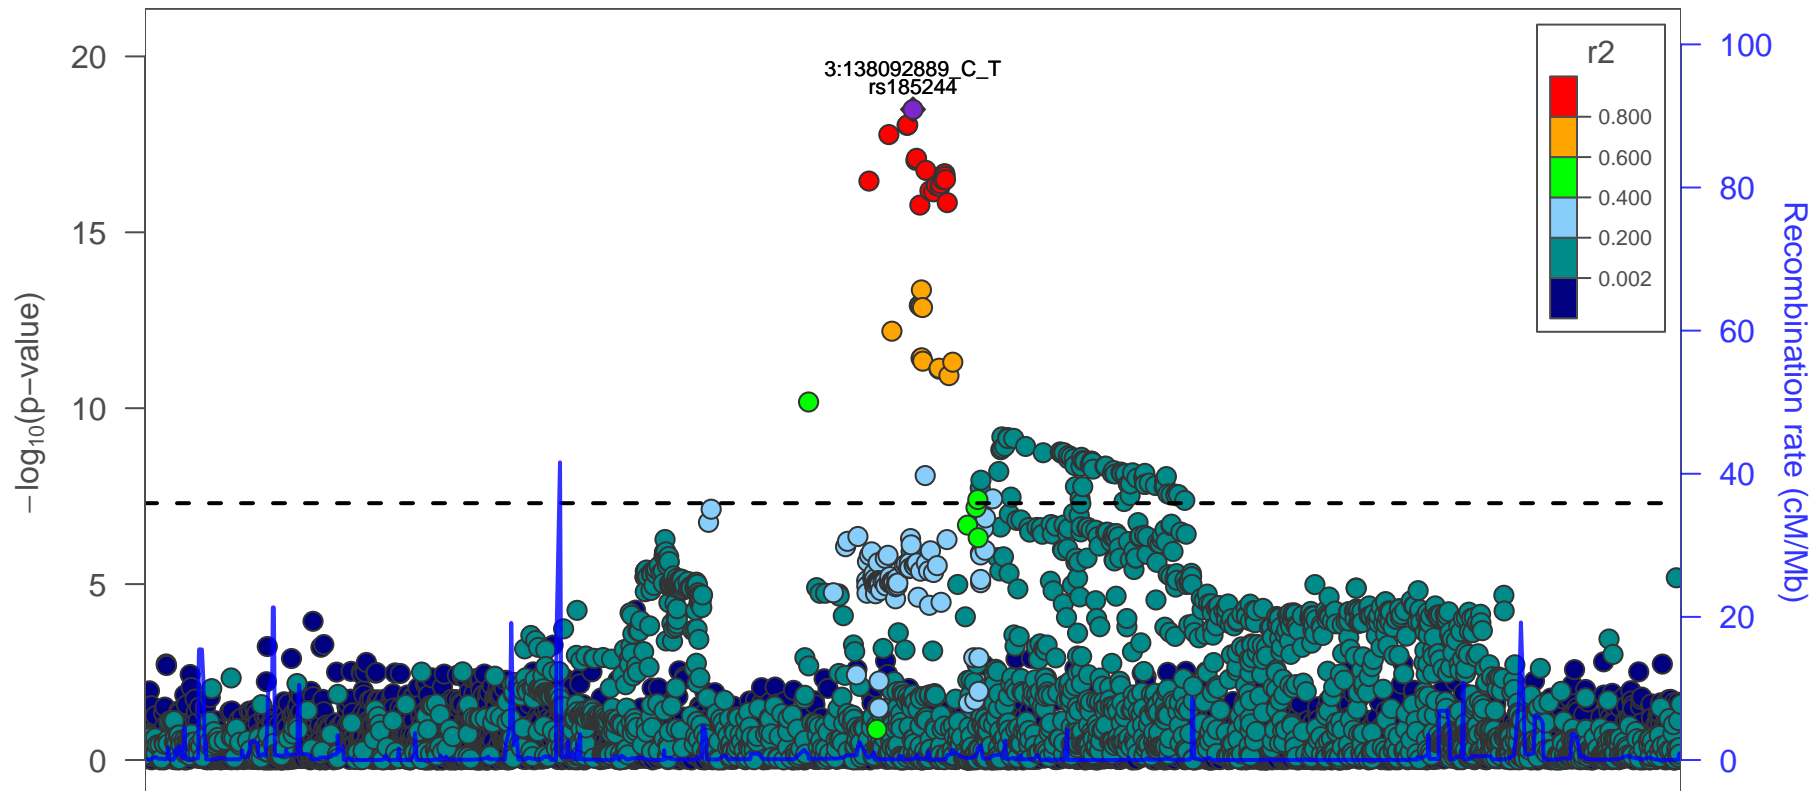

3:138092889 C\_T  
rs185244

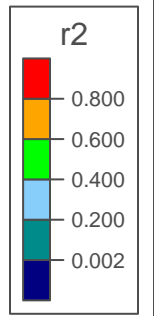

Recombination rate (cM/Mb)

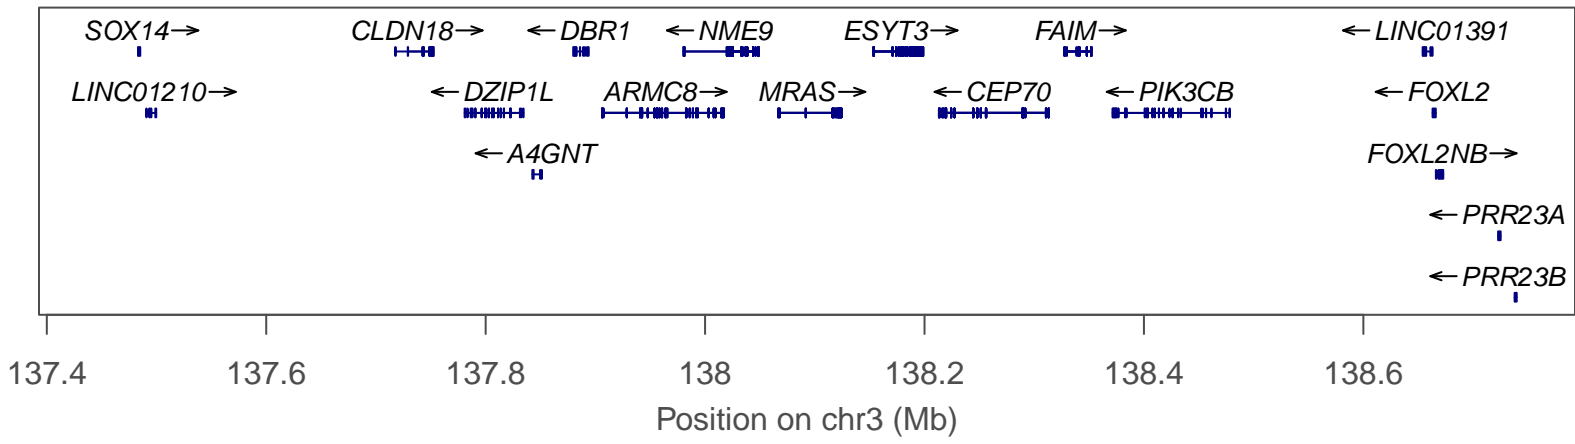

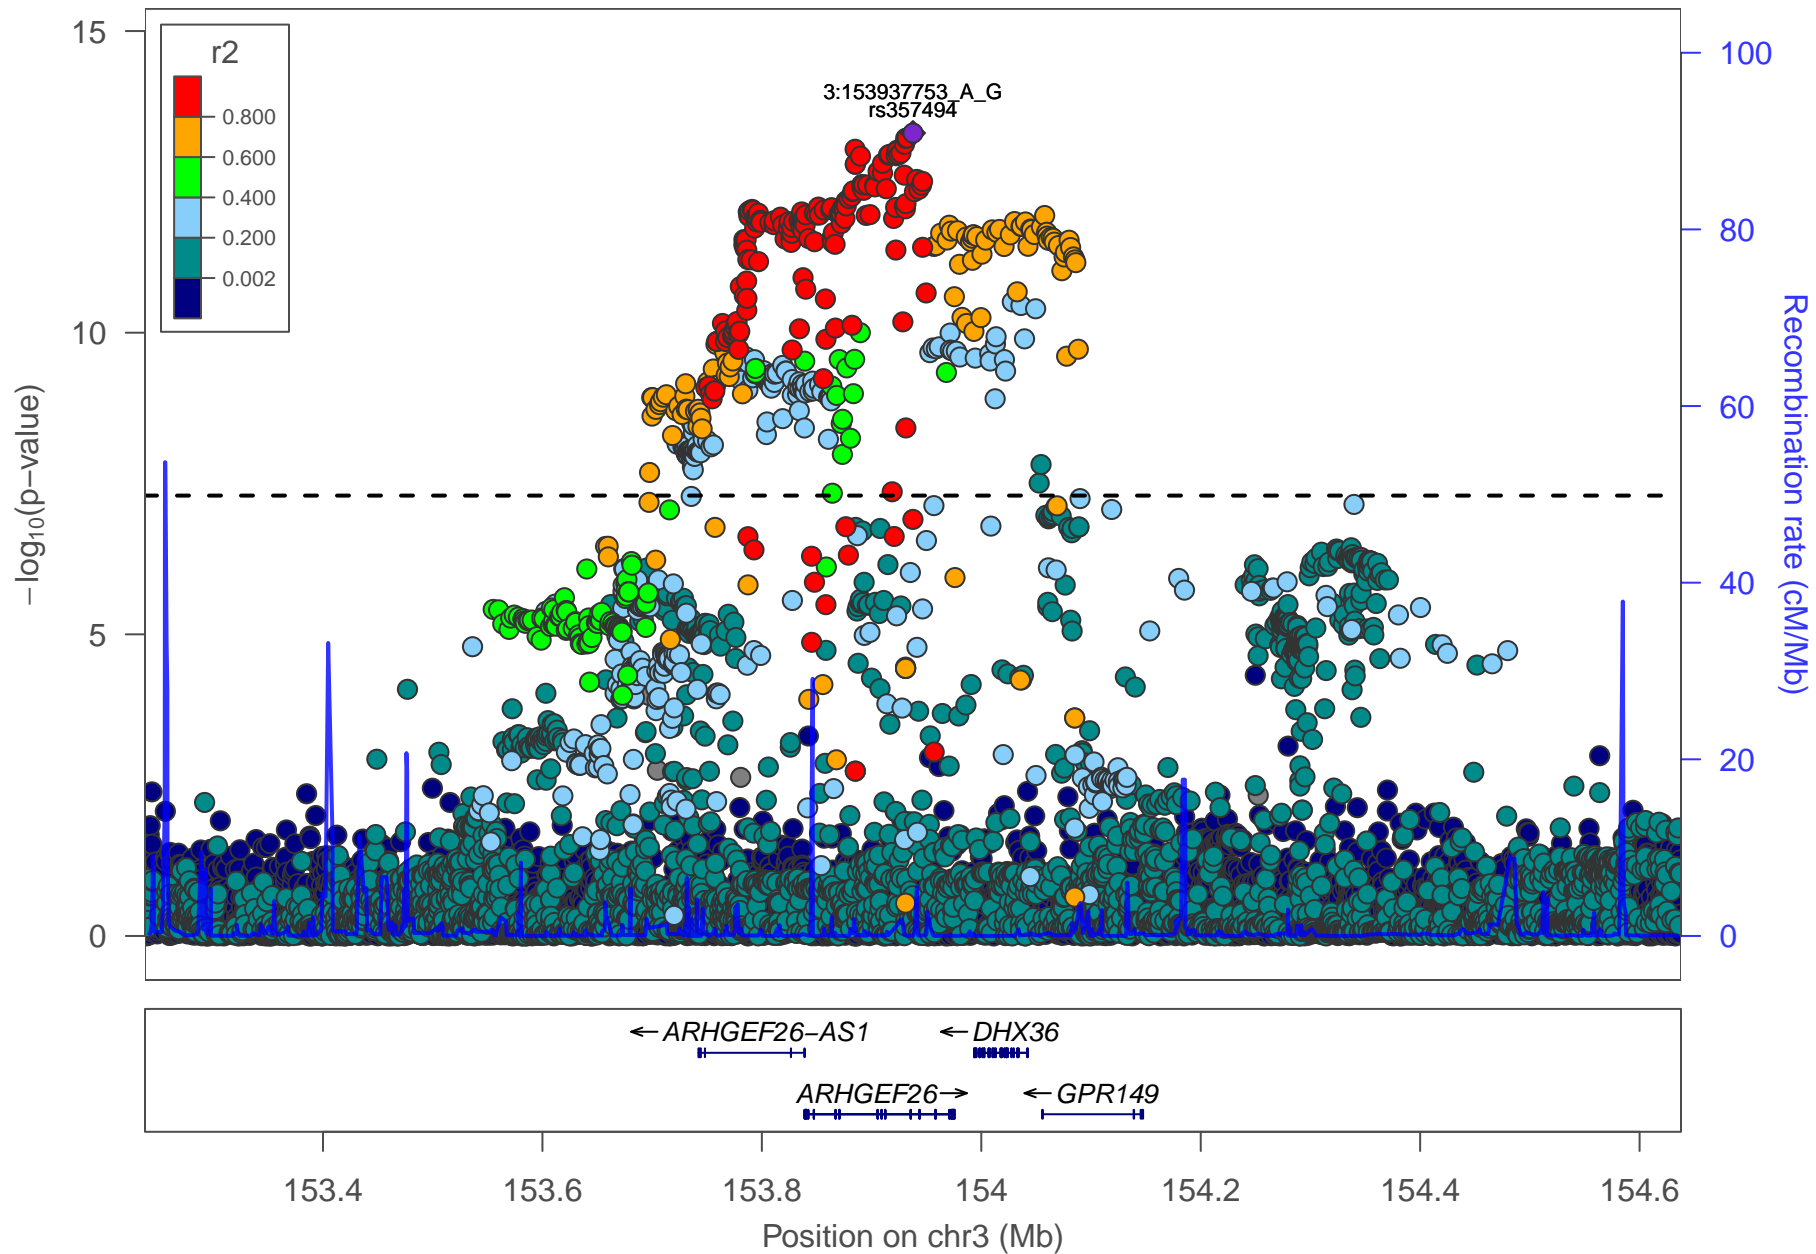

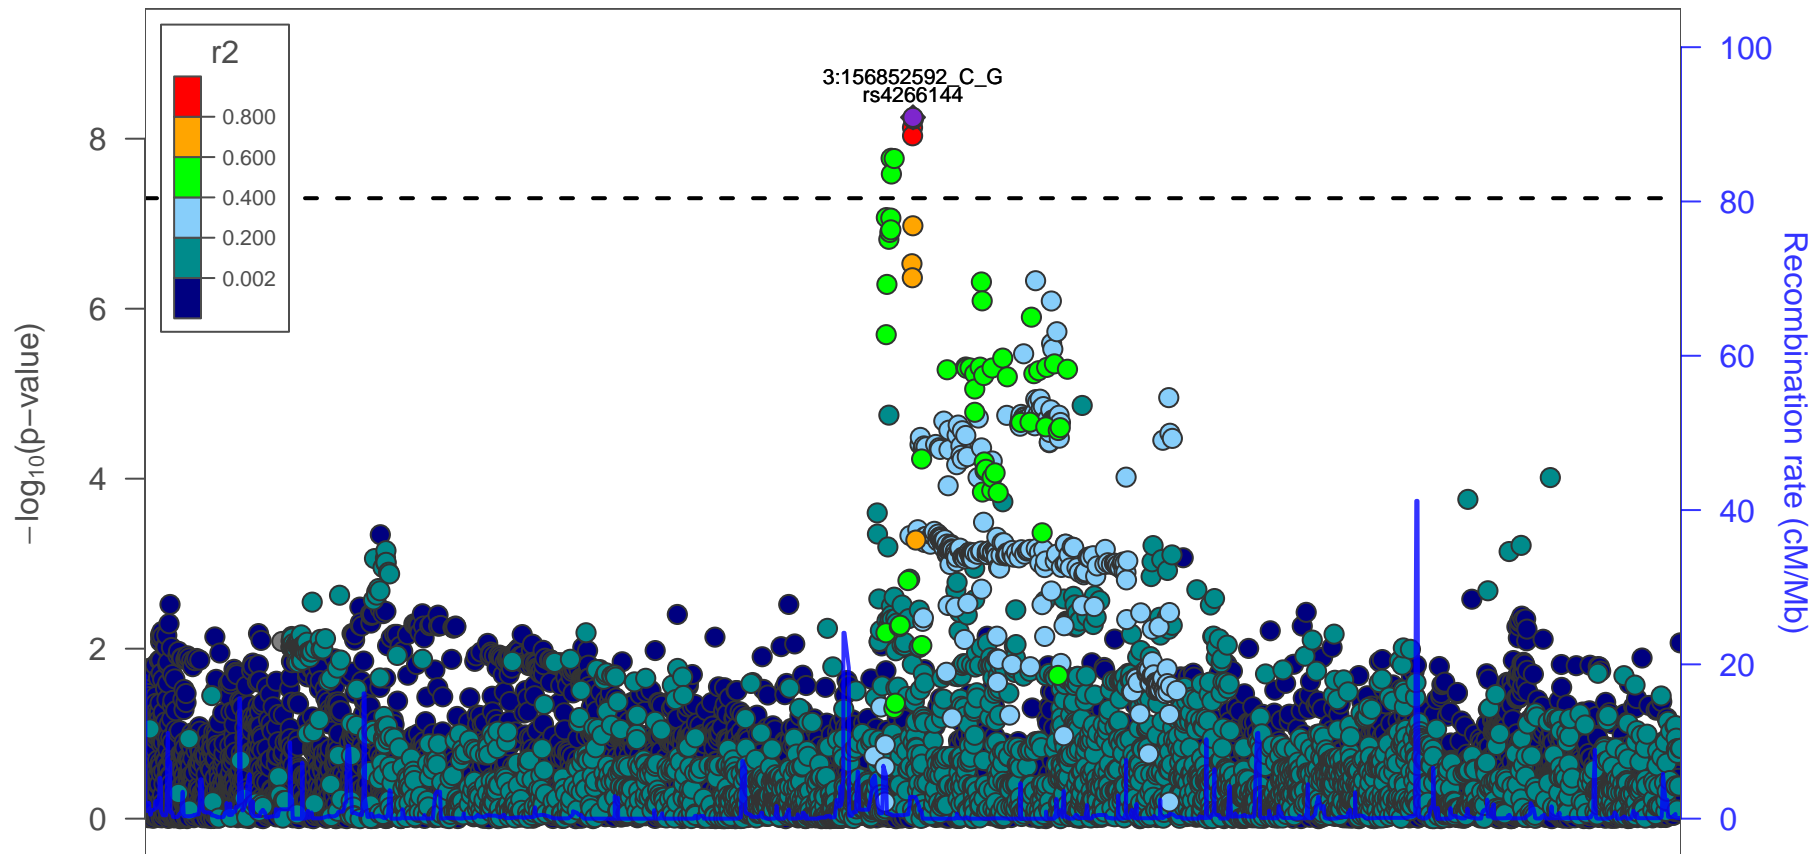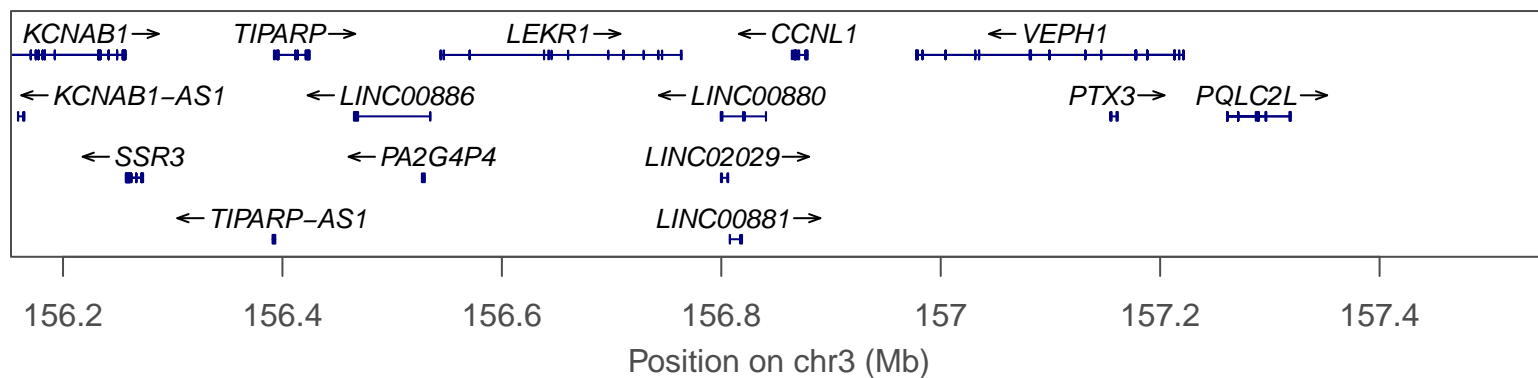

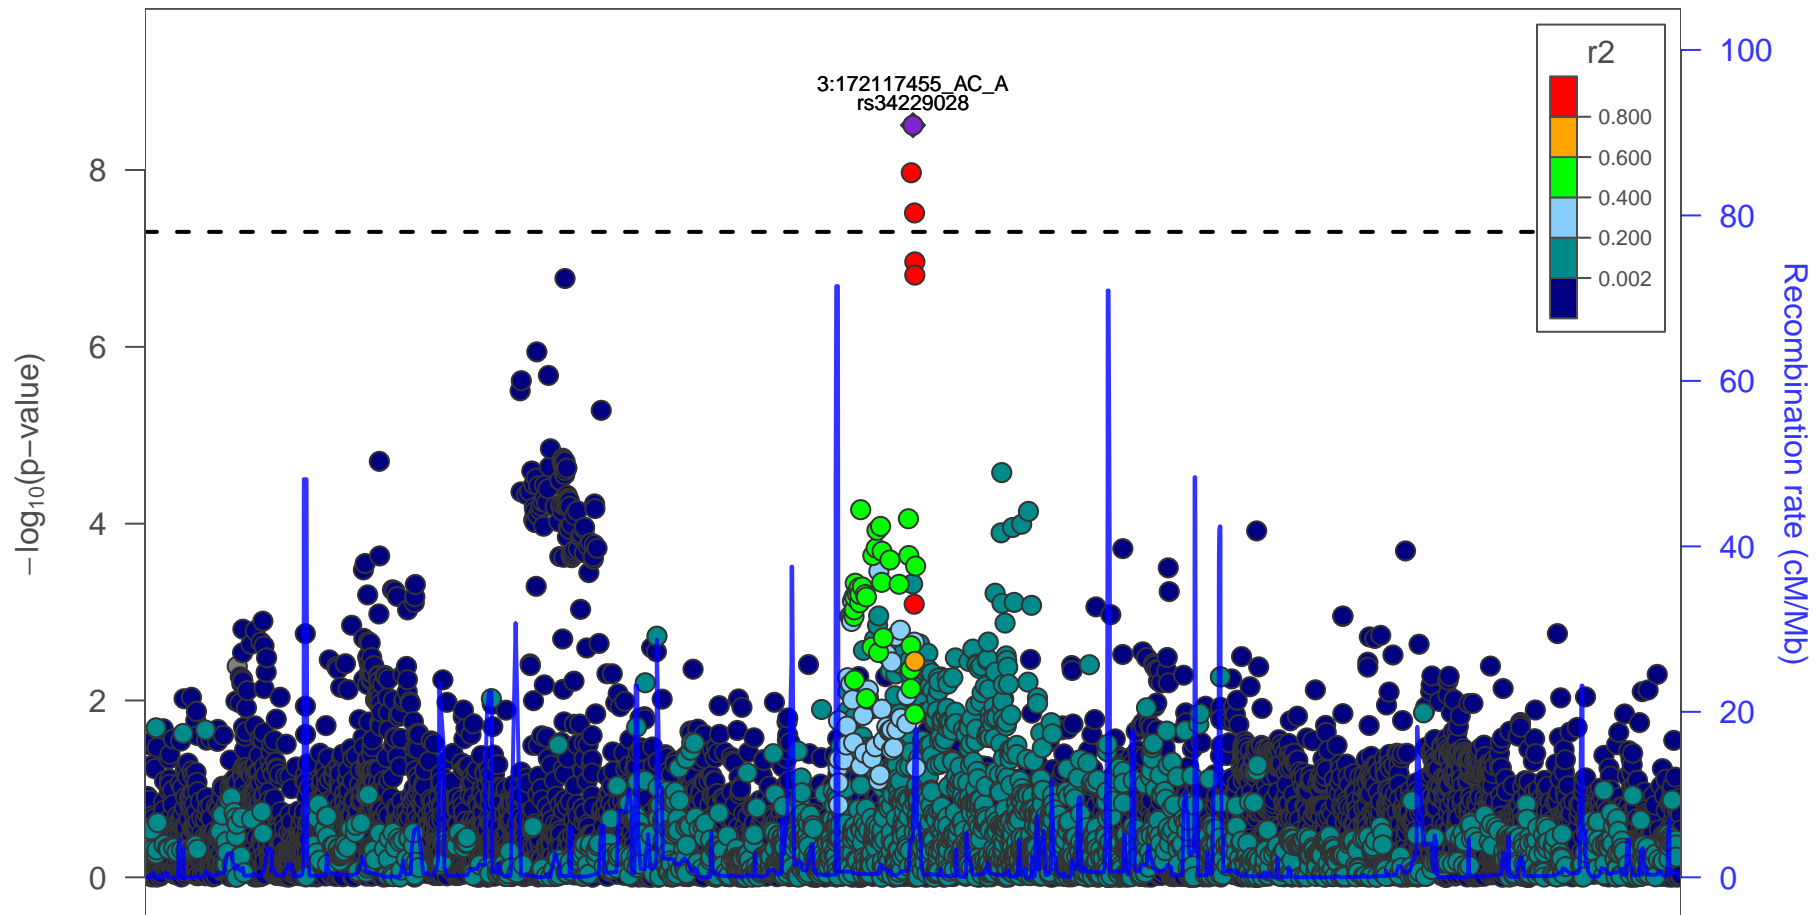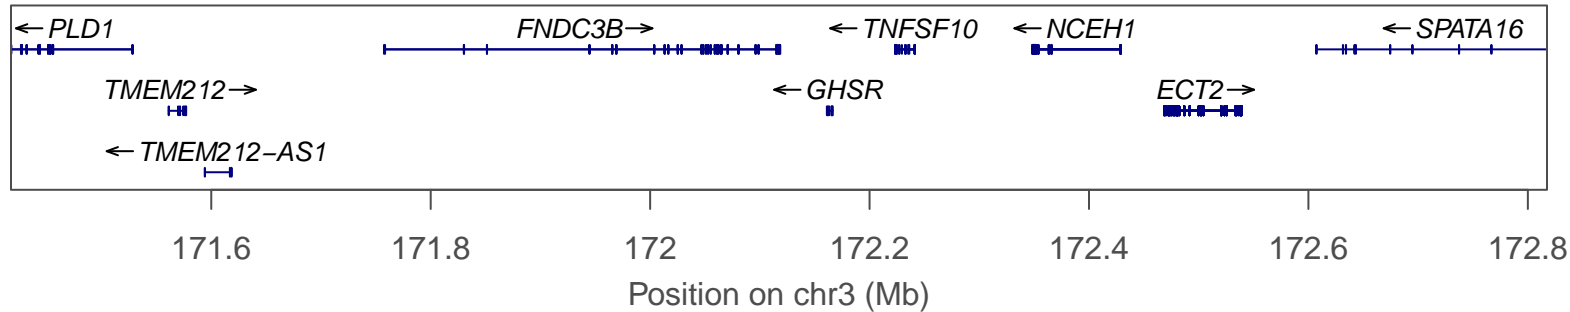



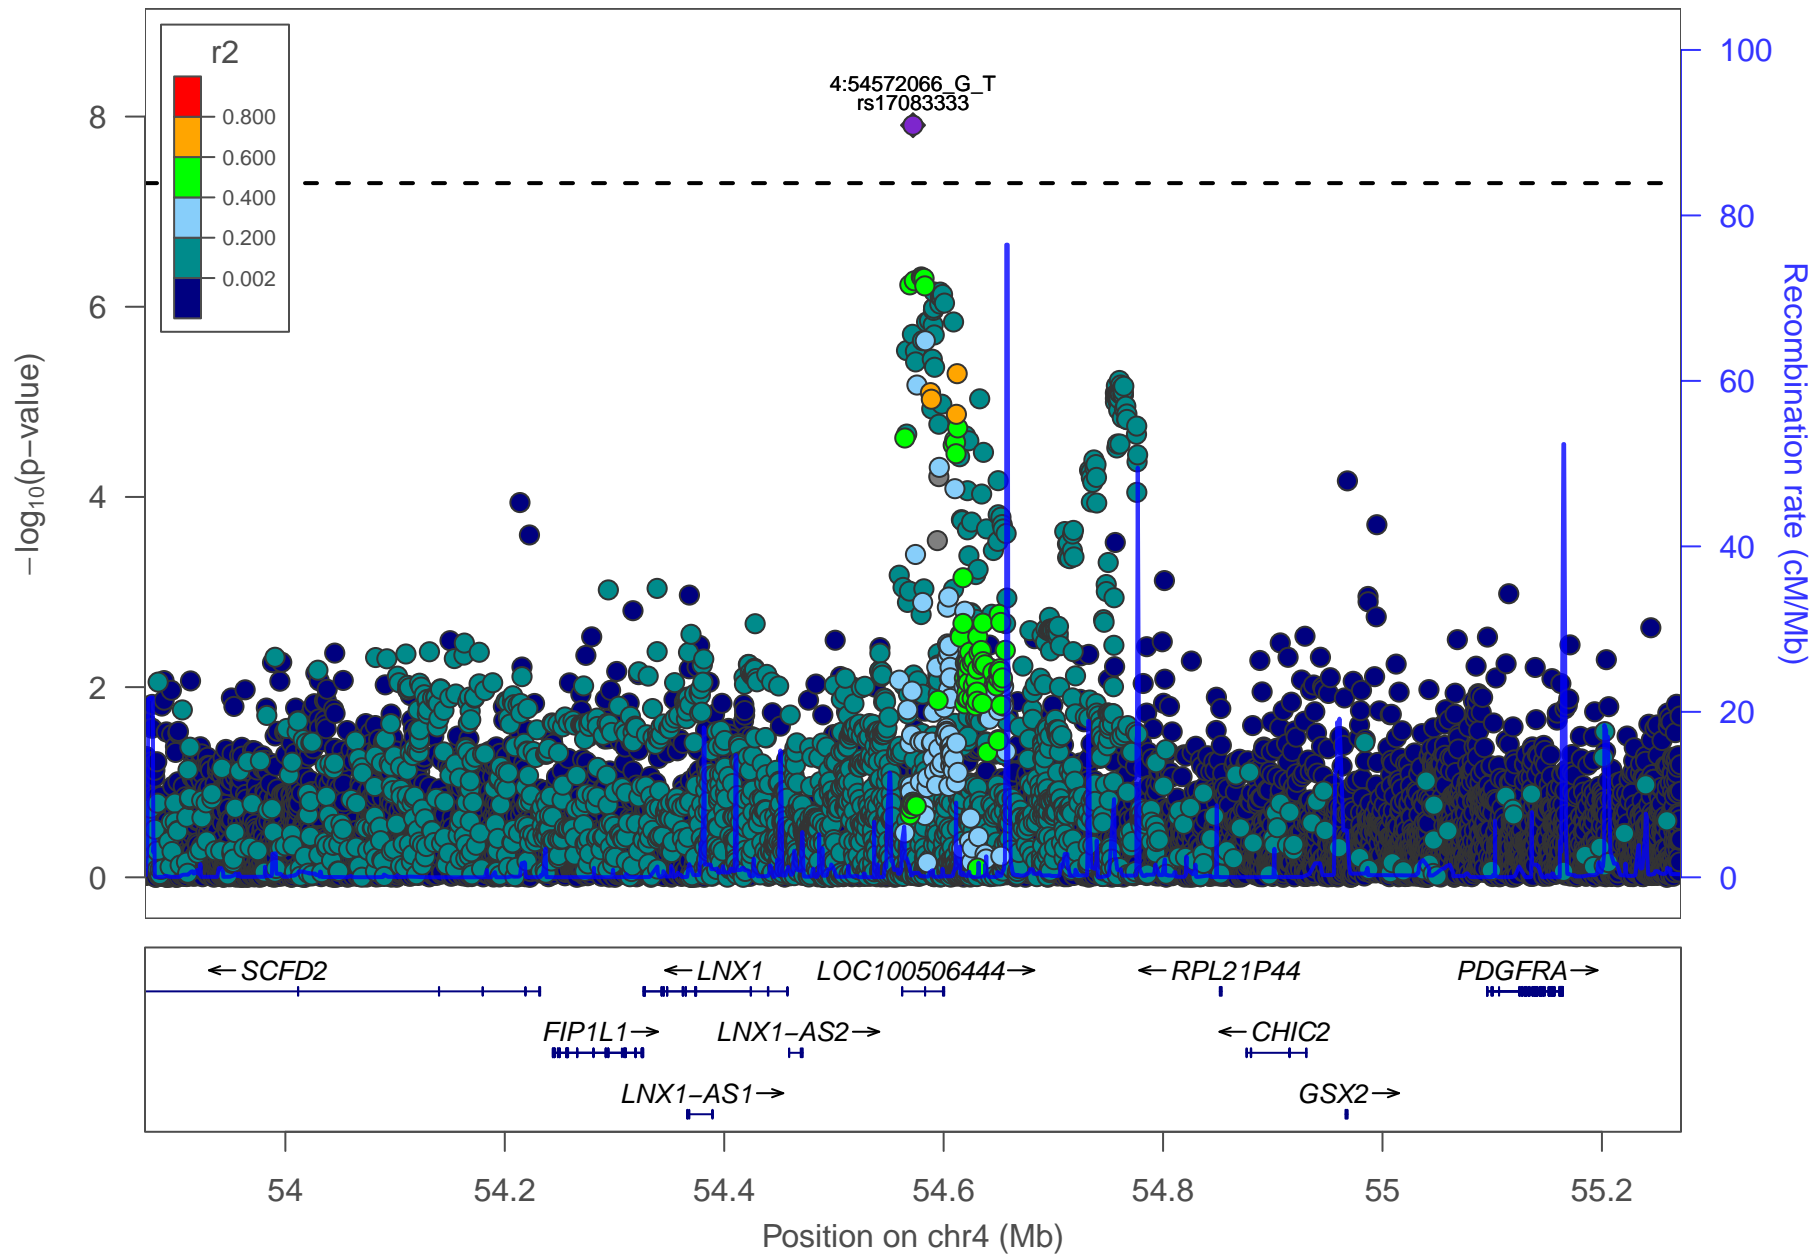

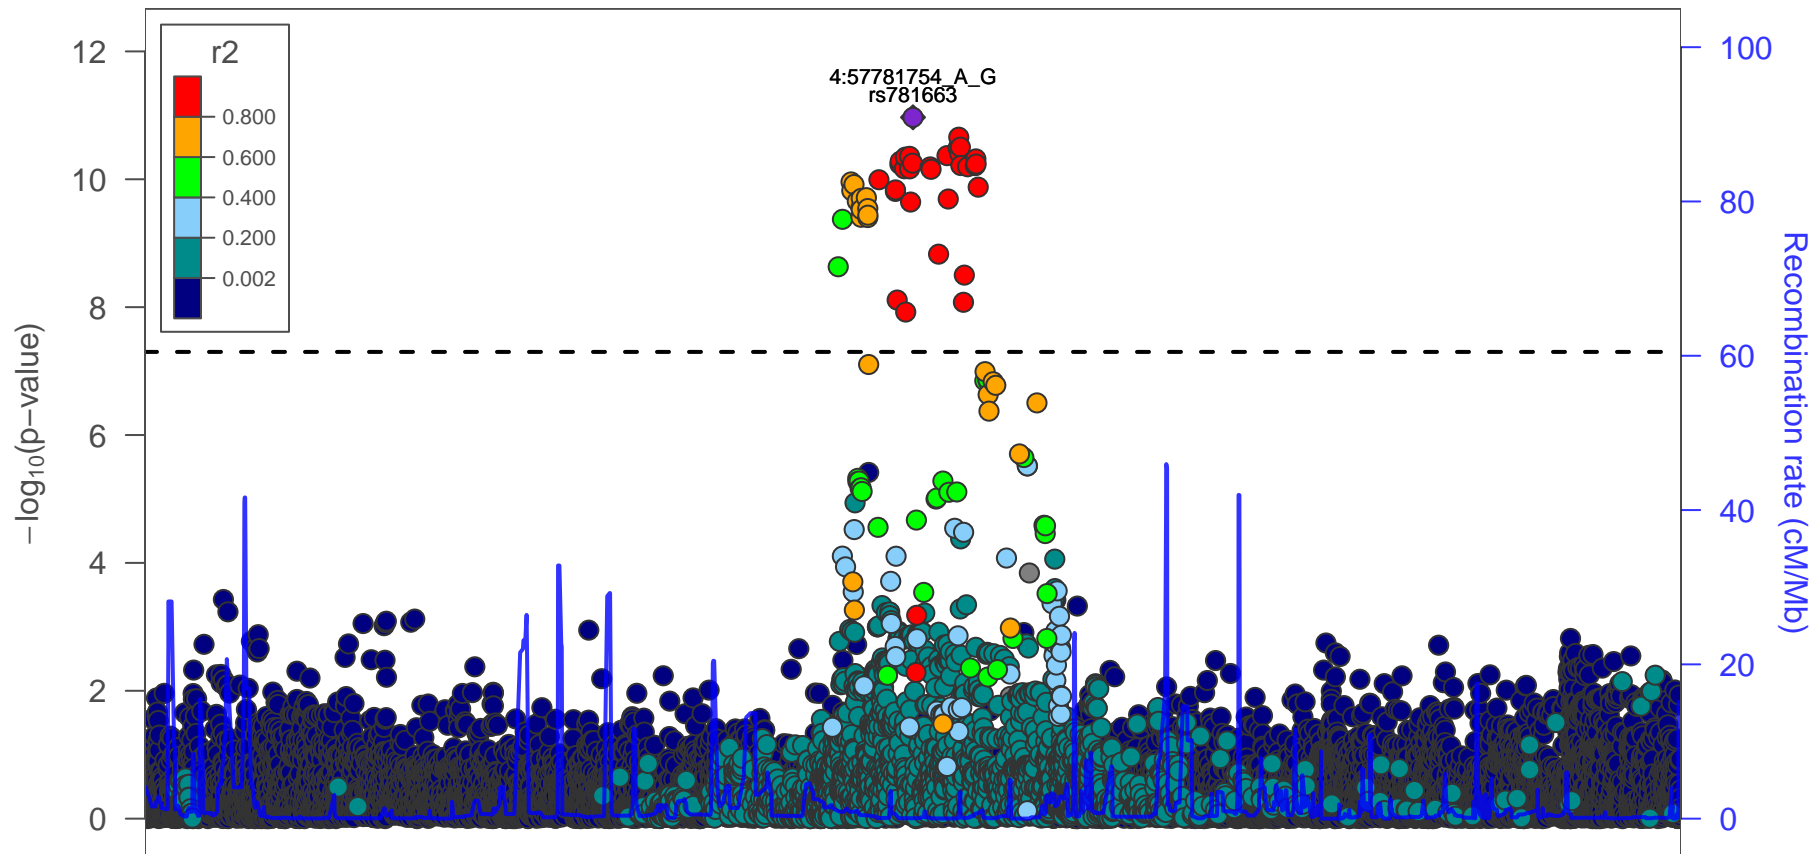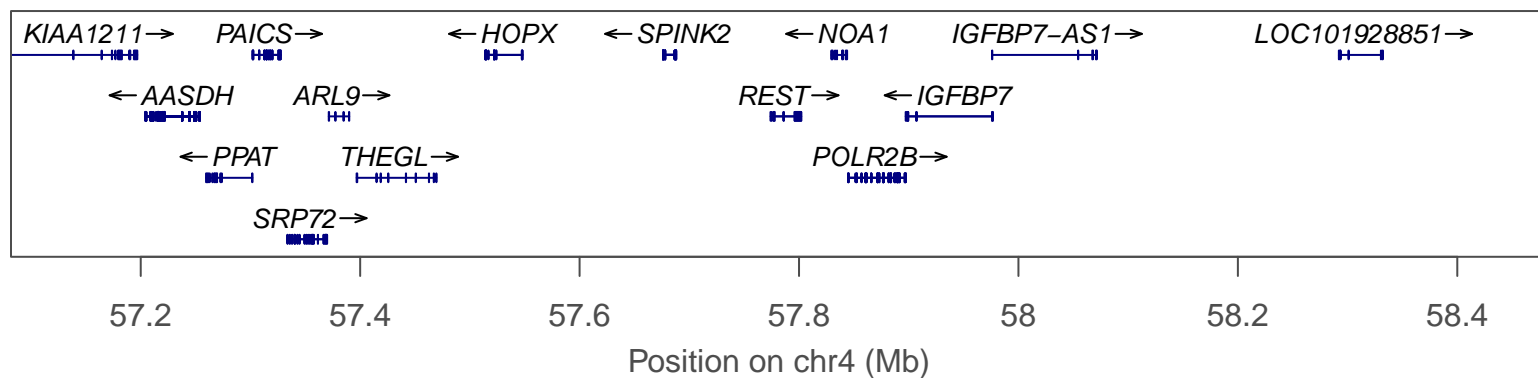

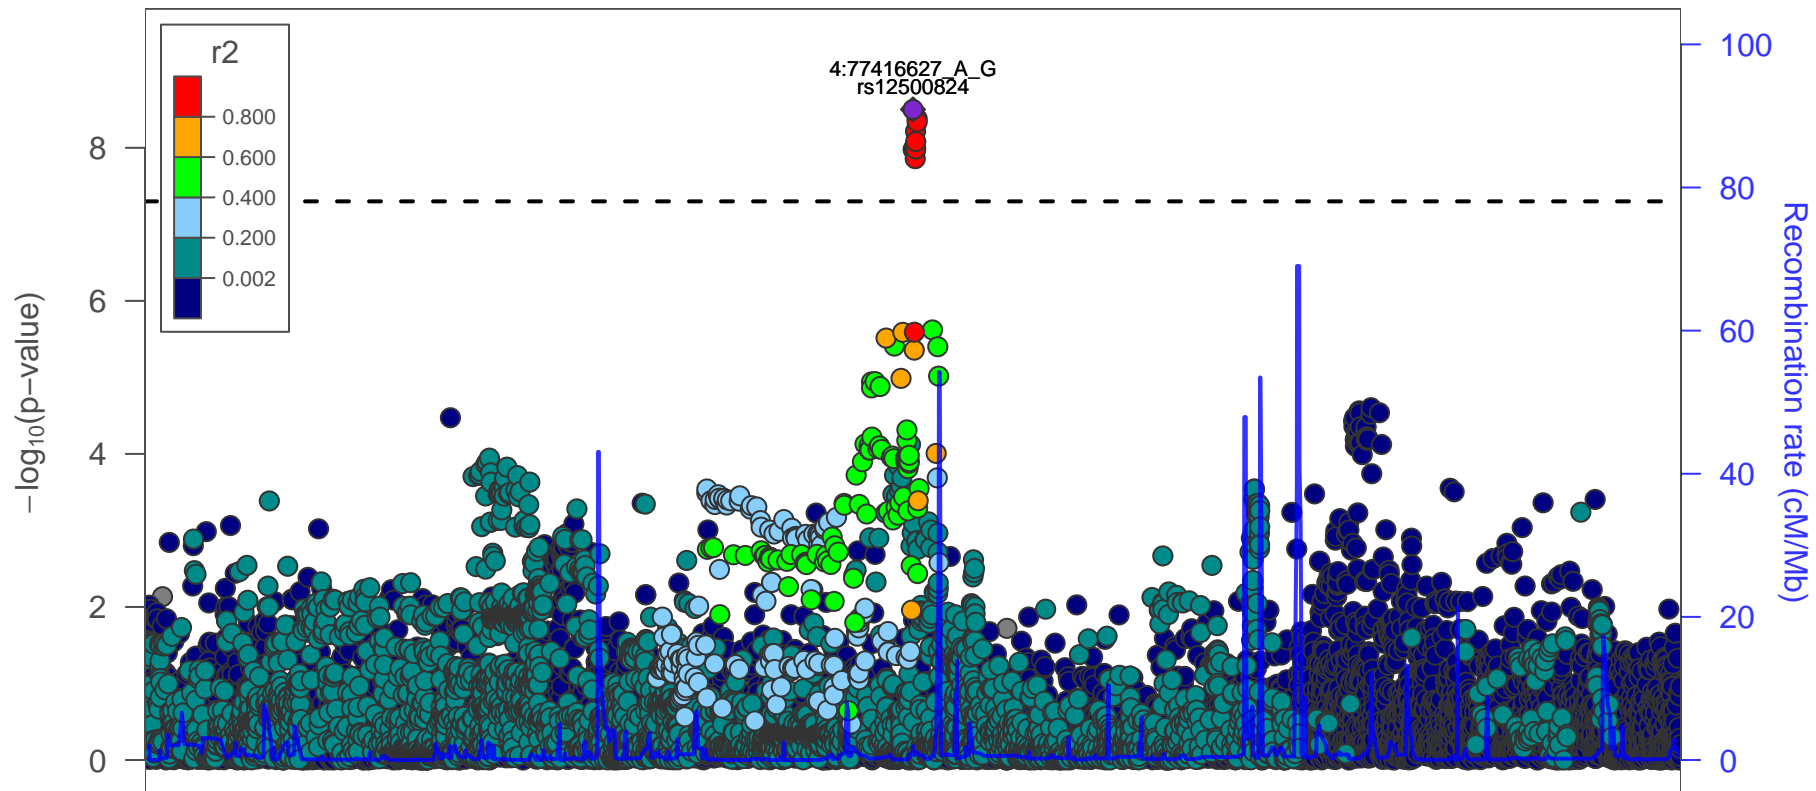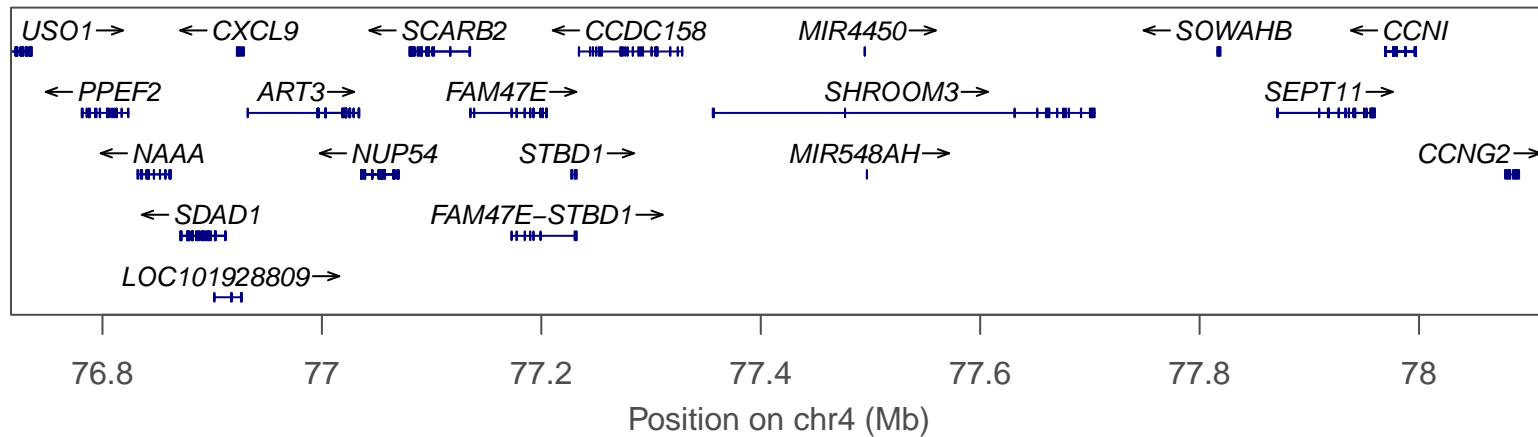

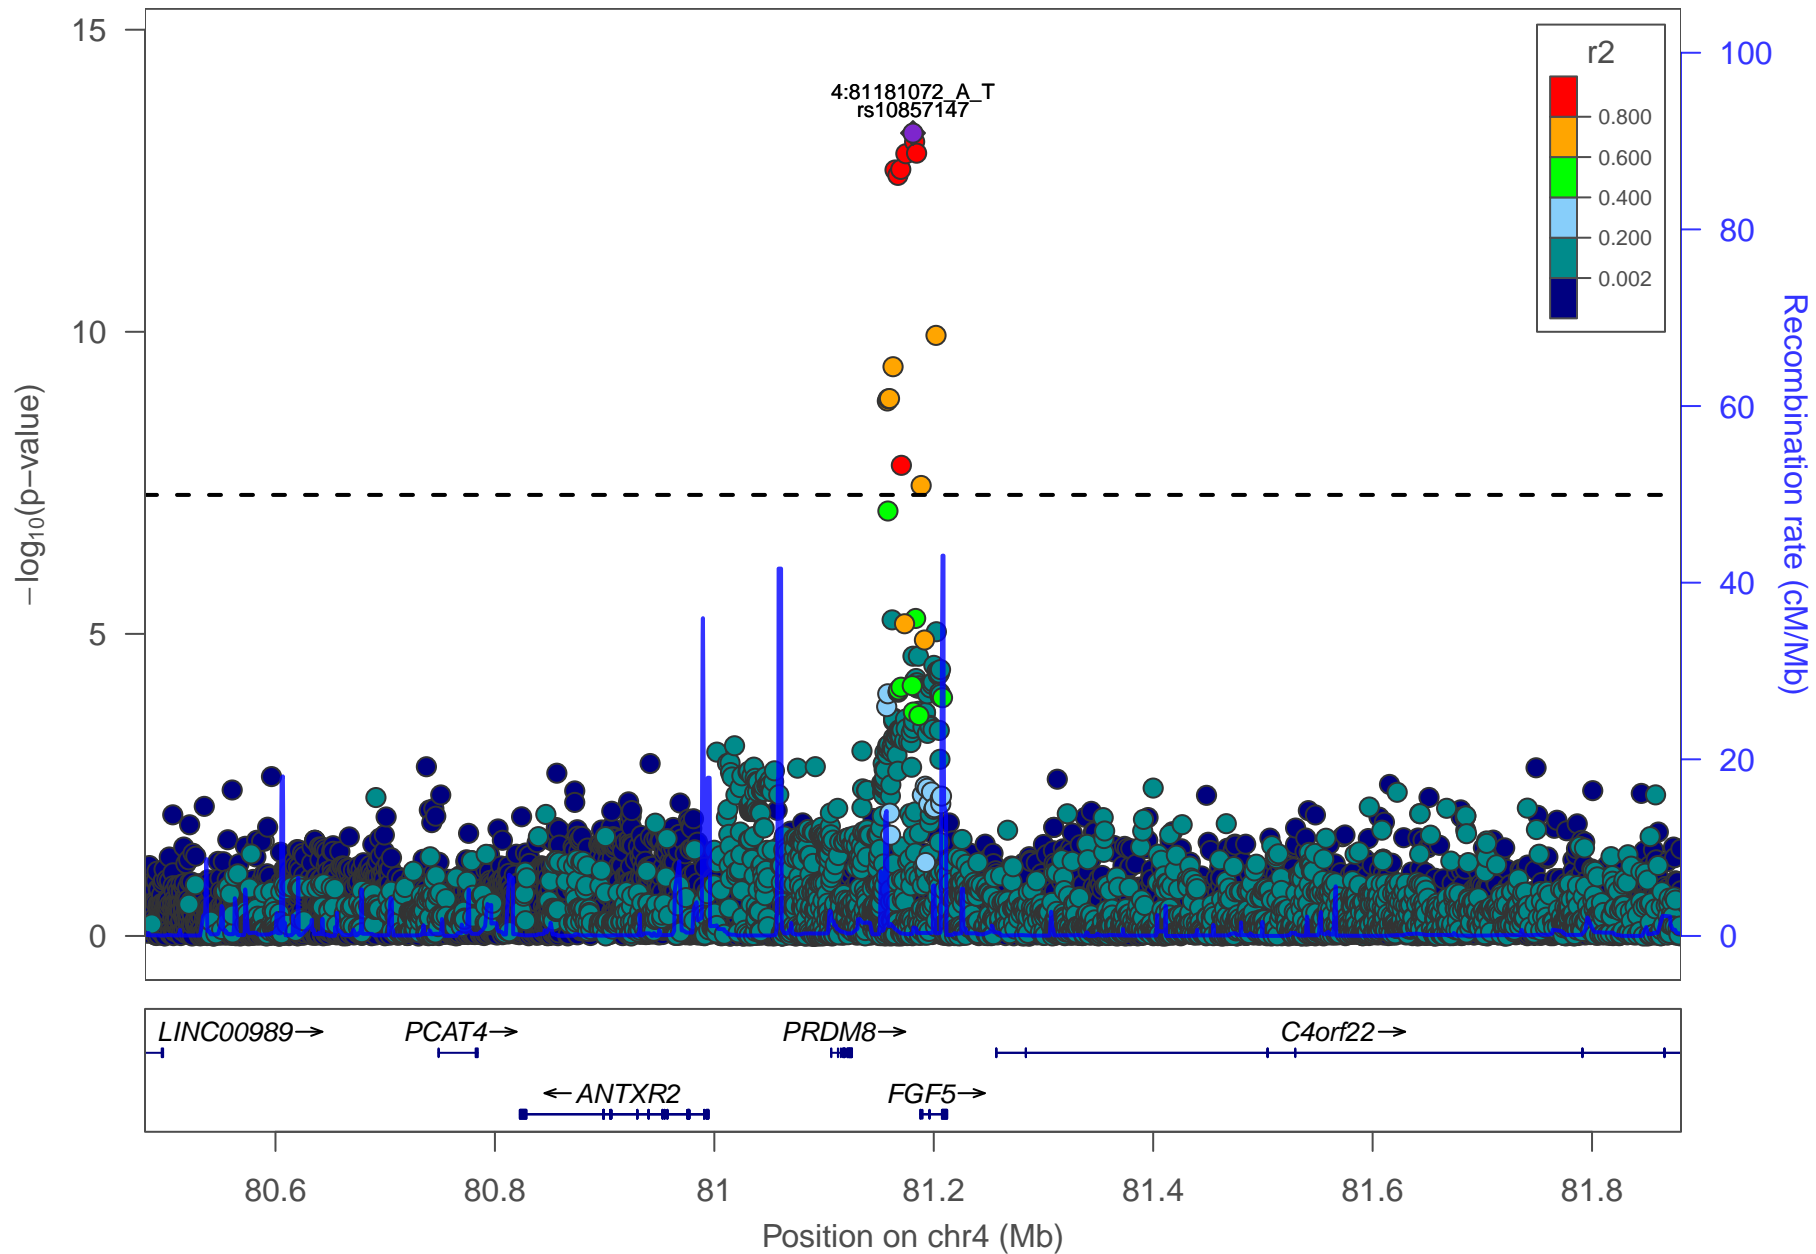

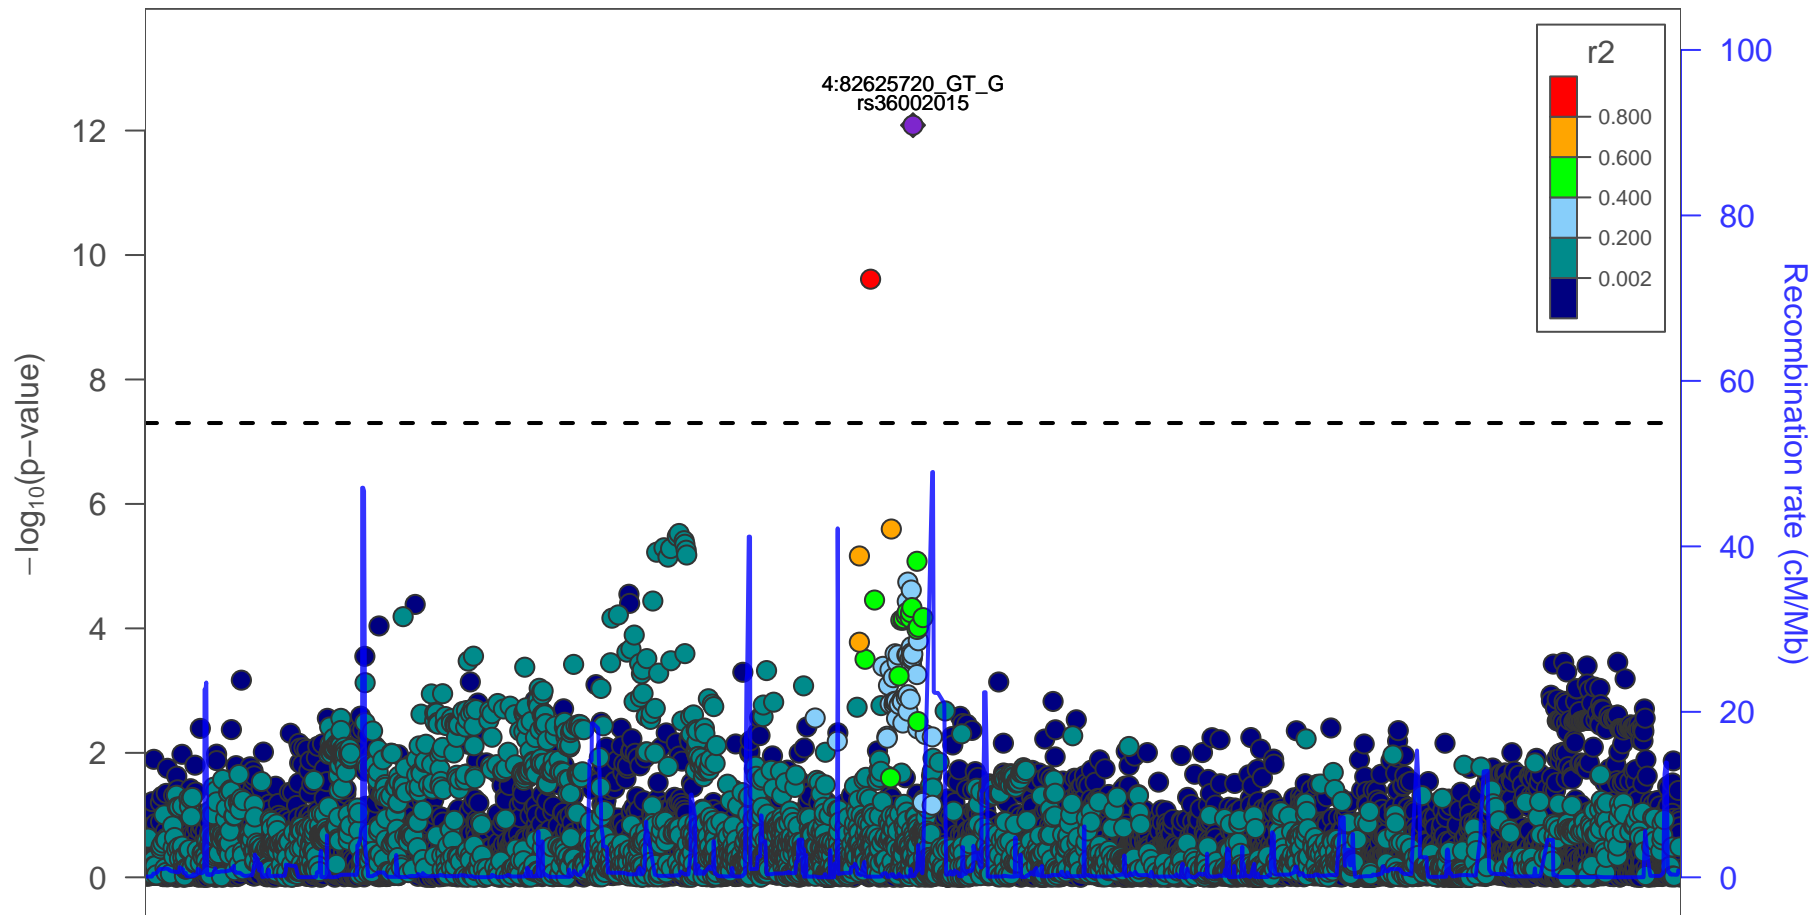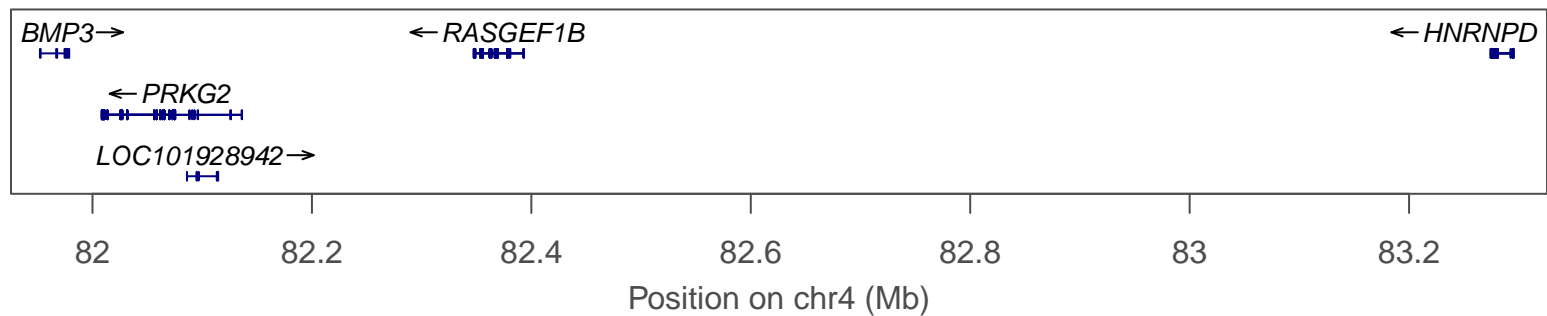

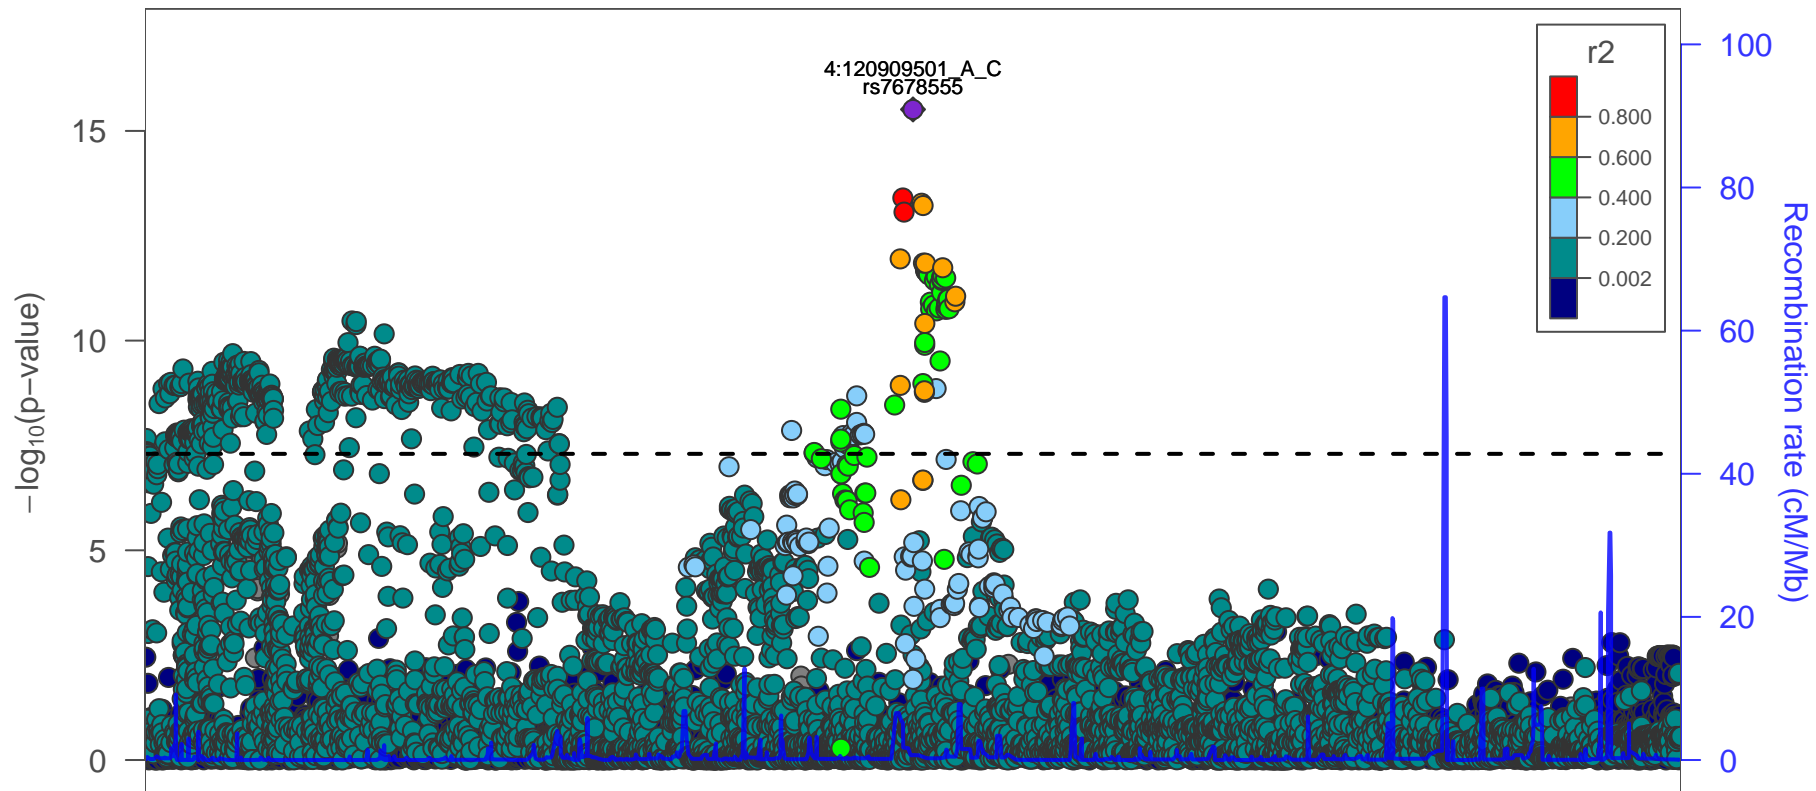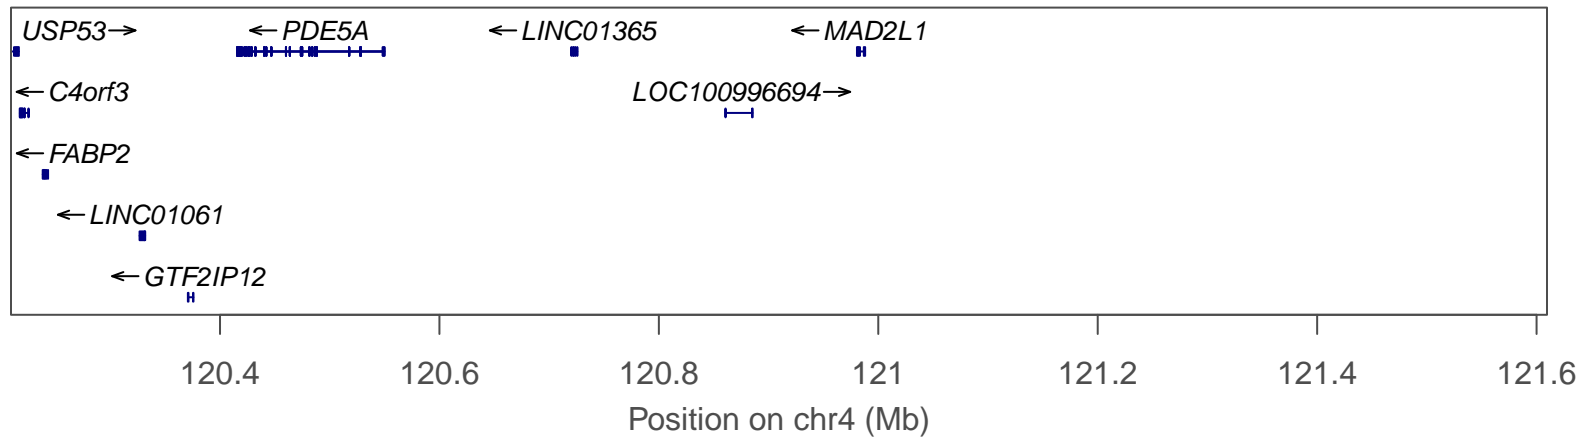

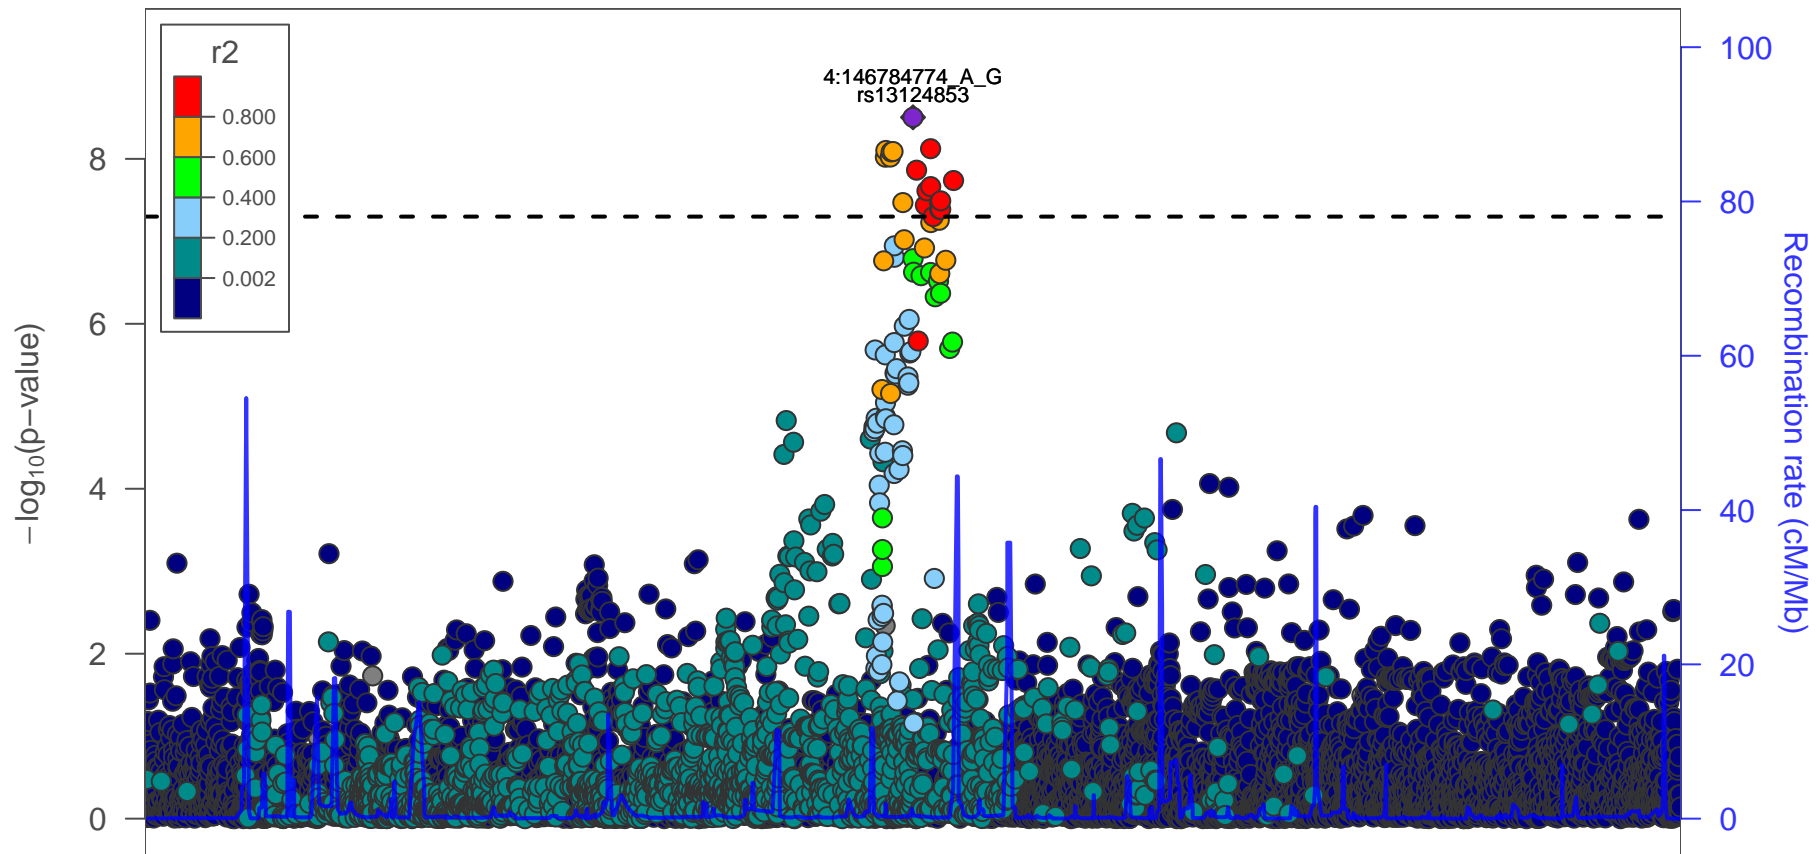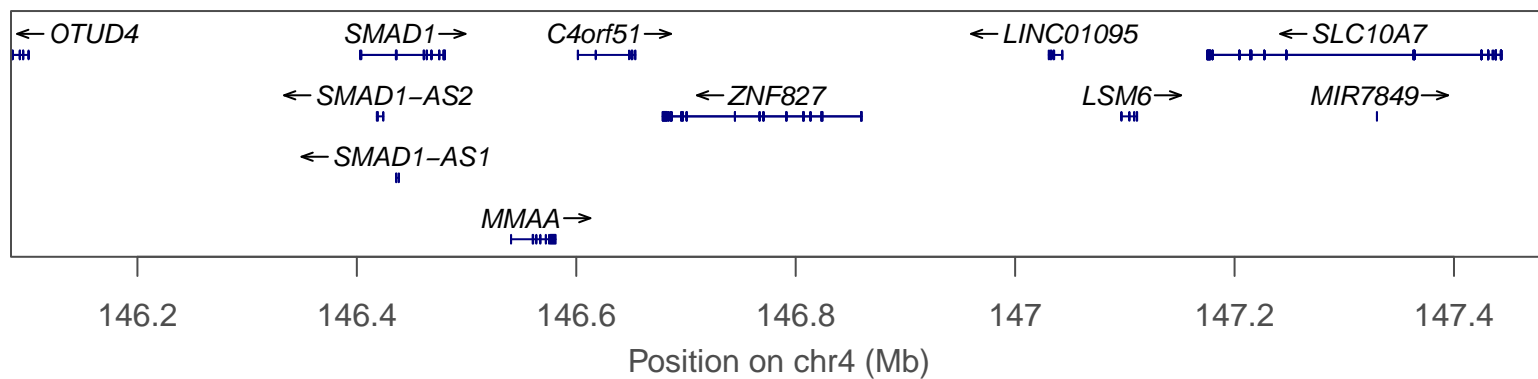

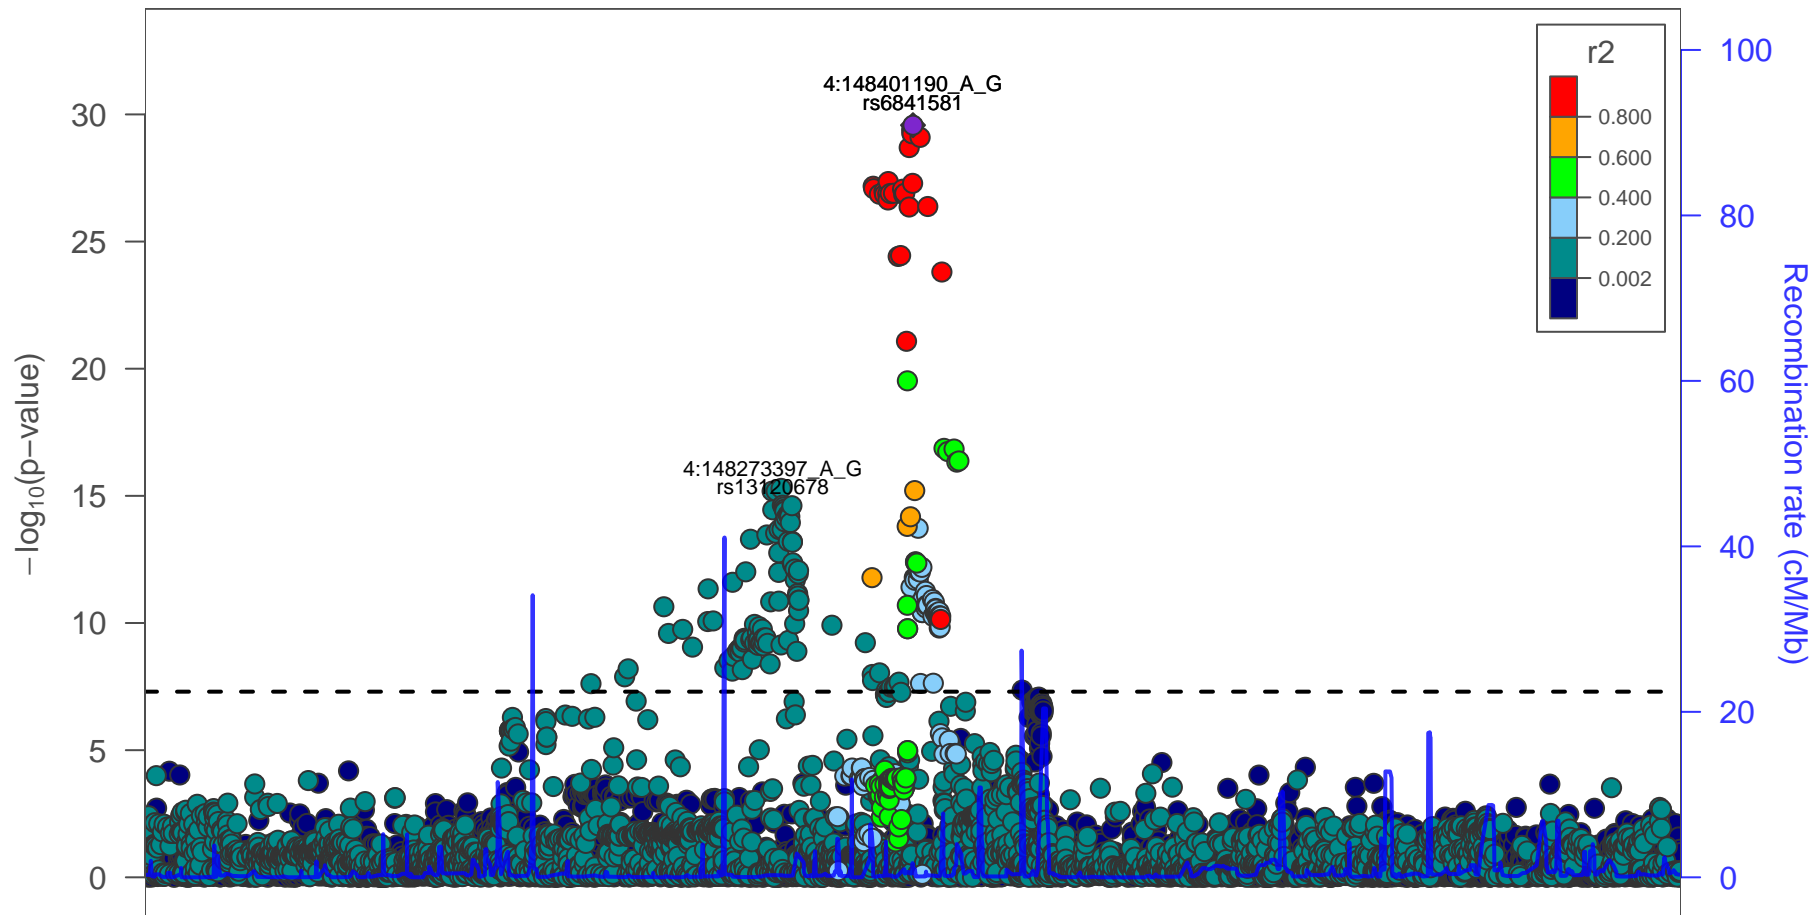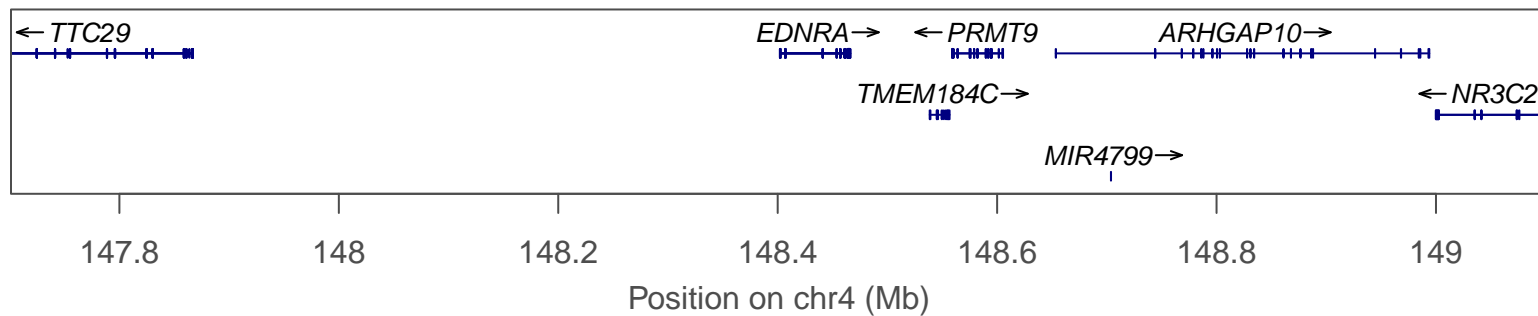



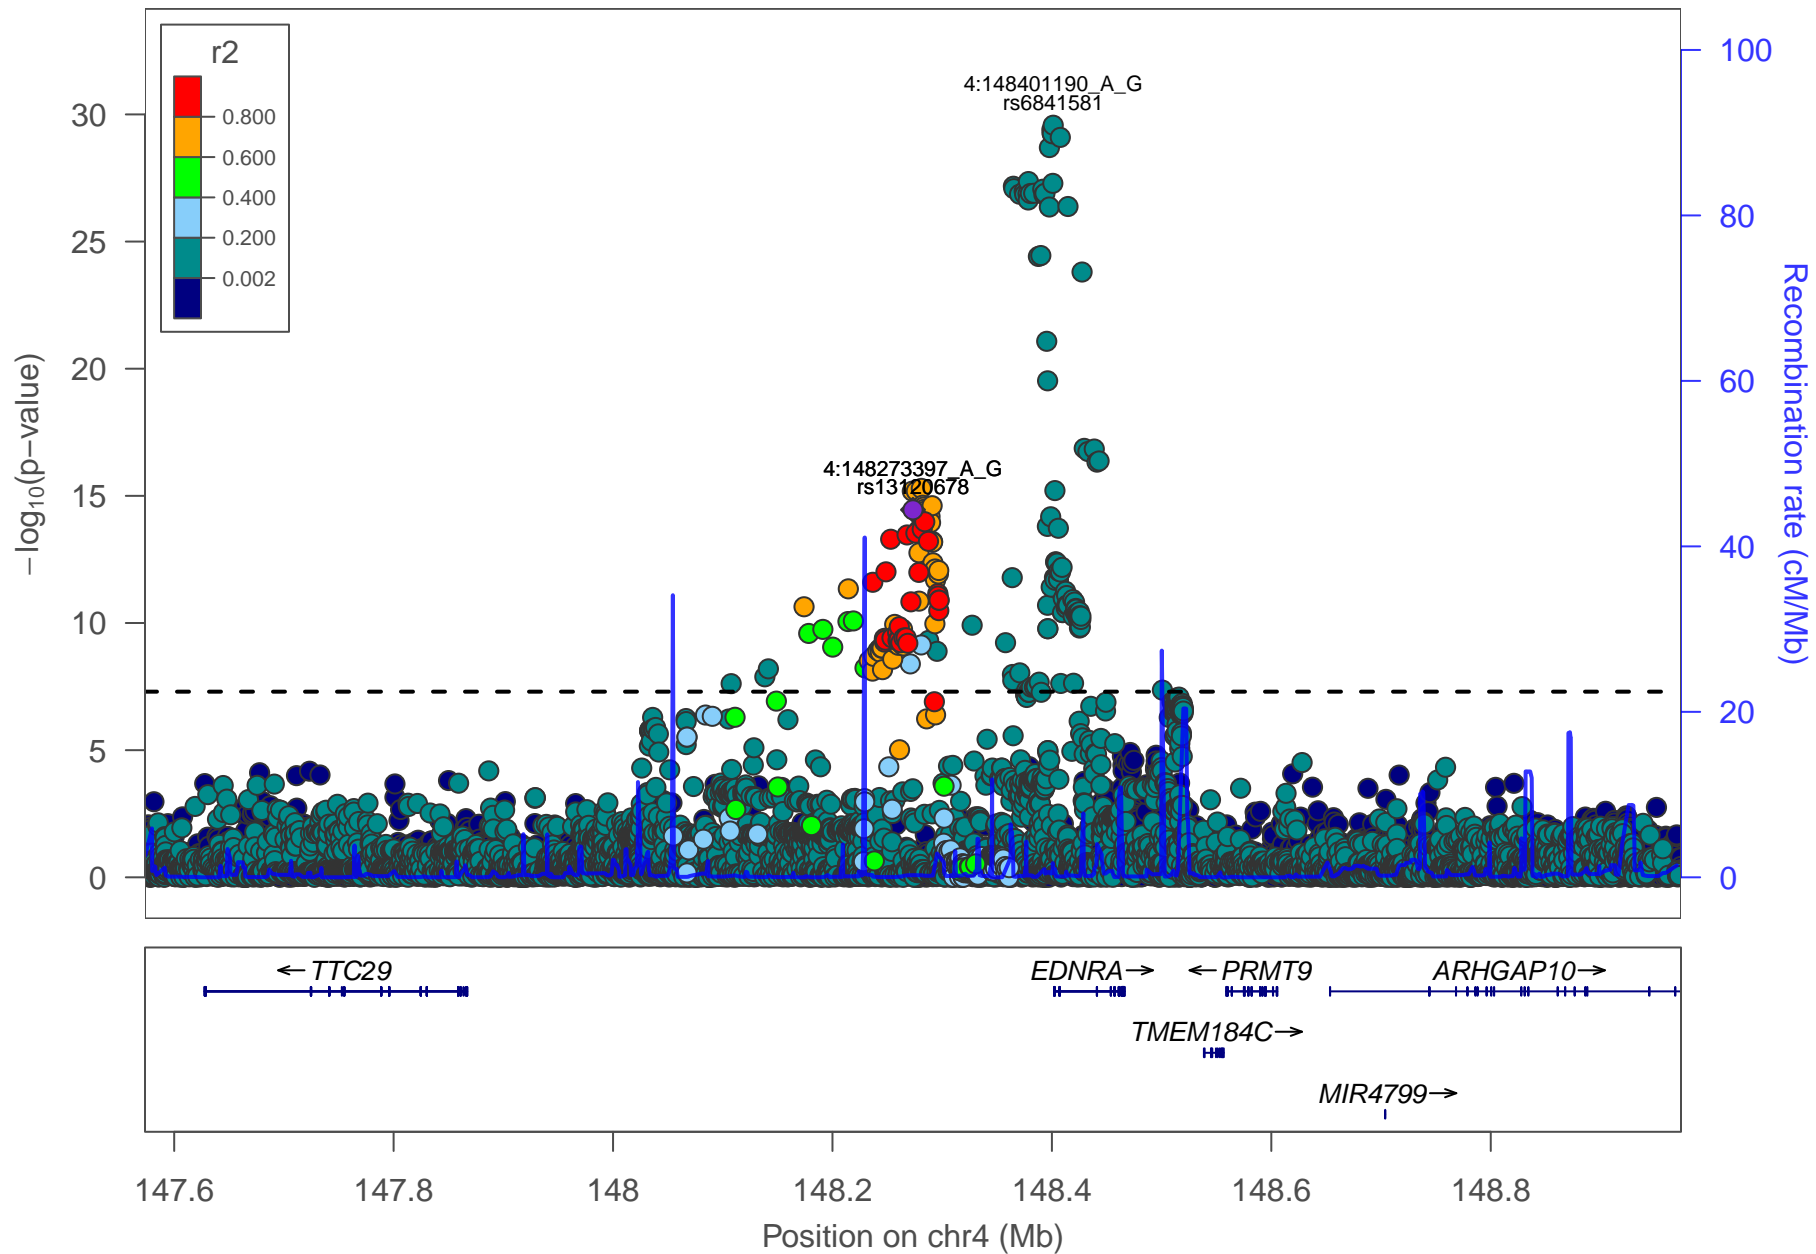

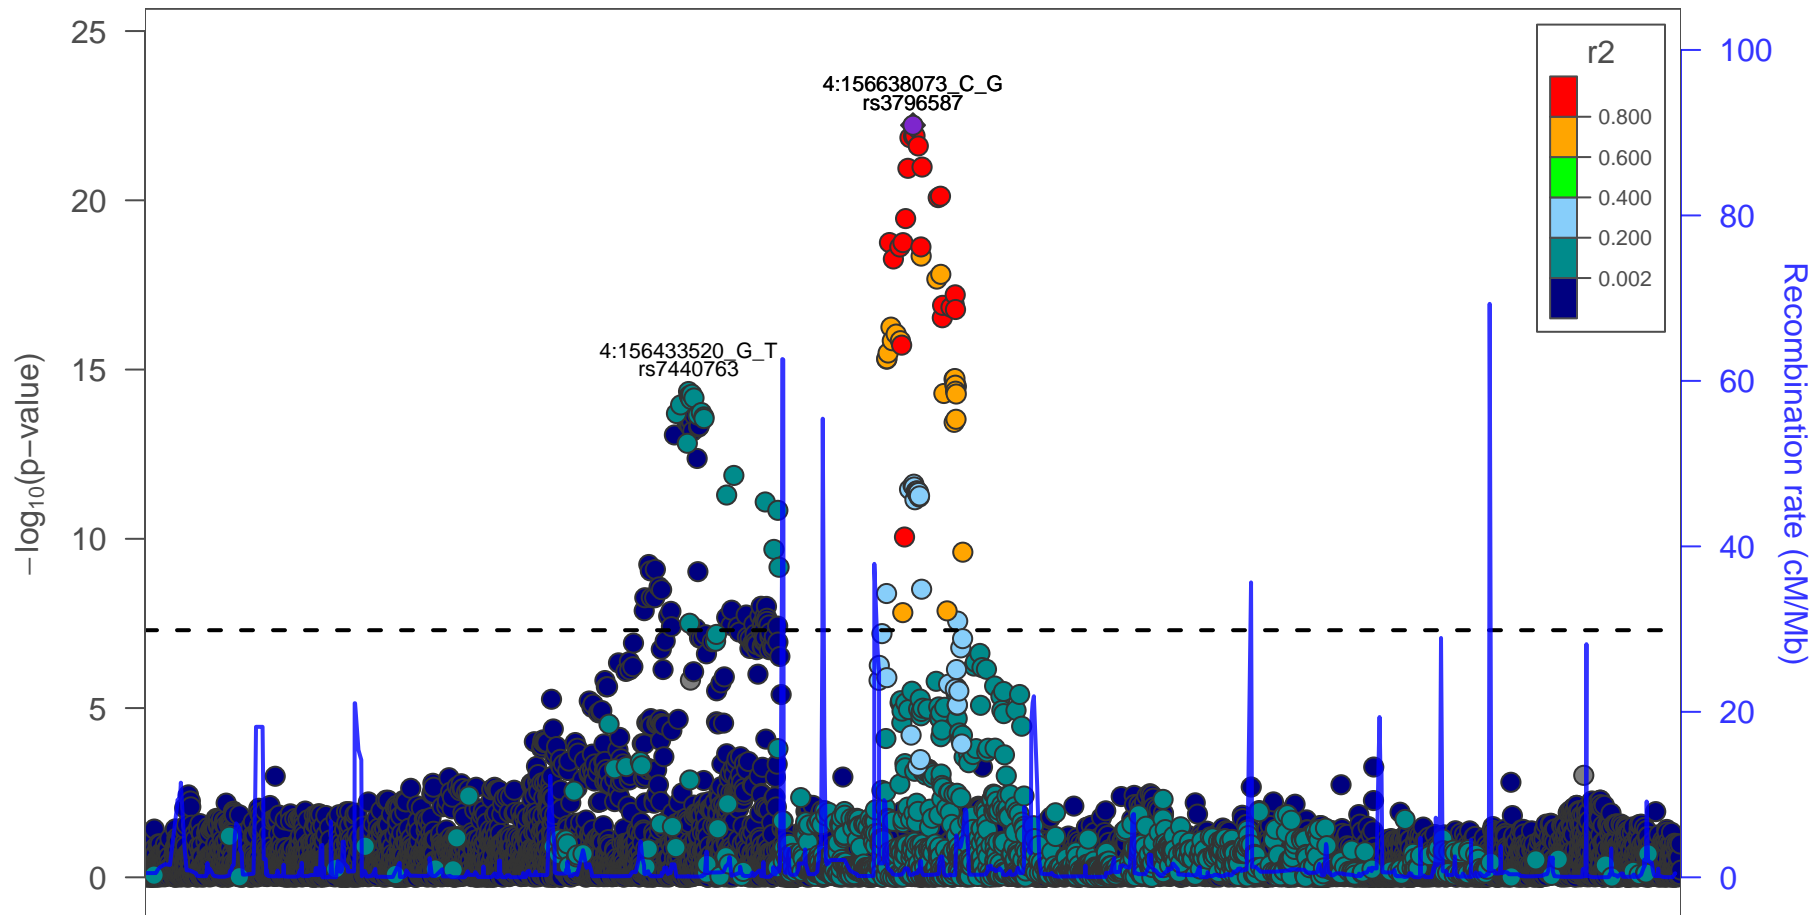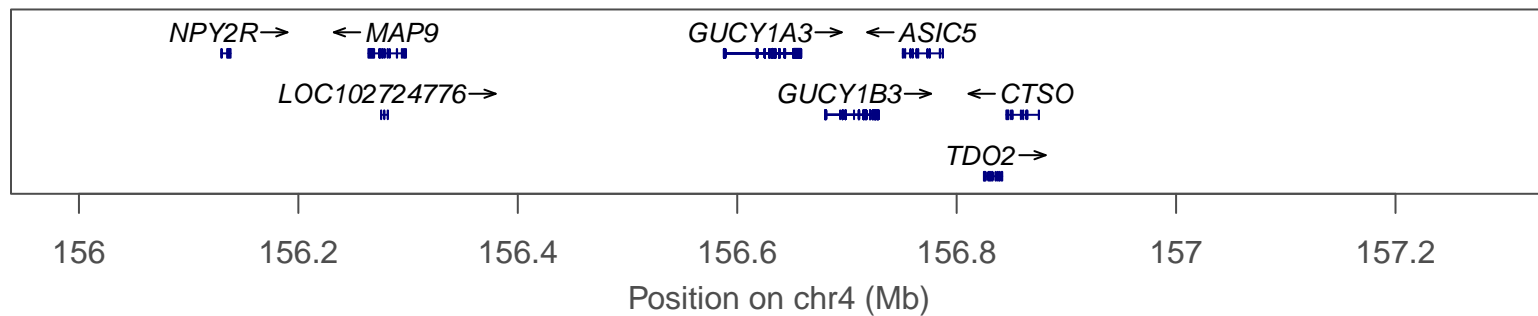

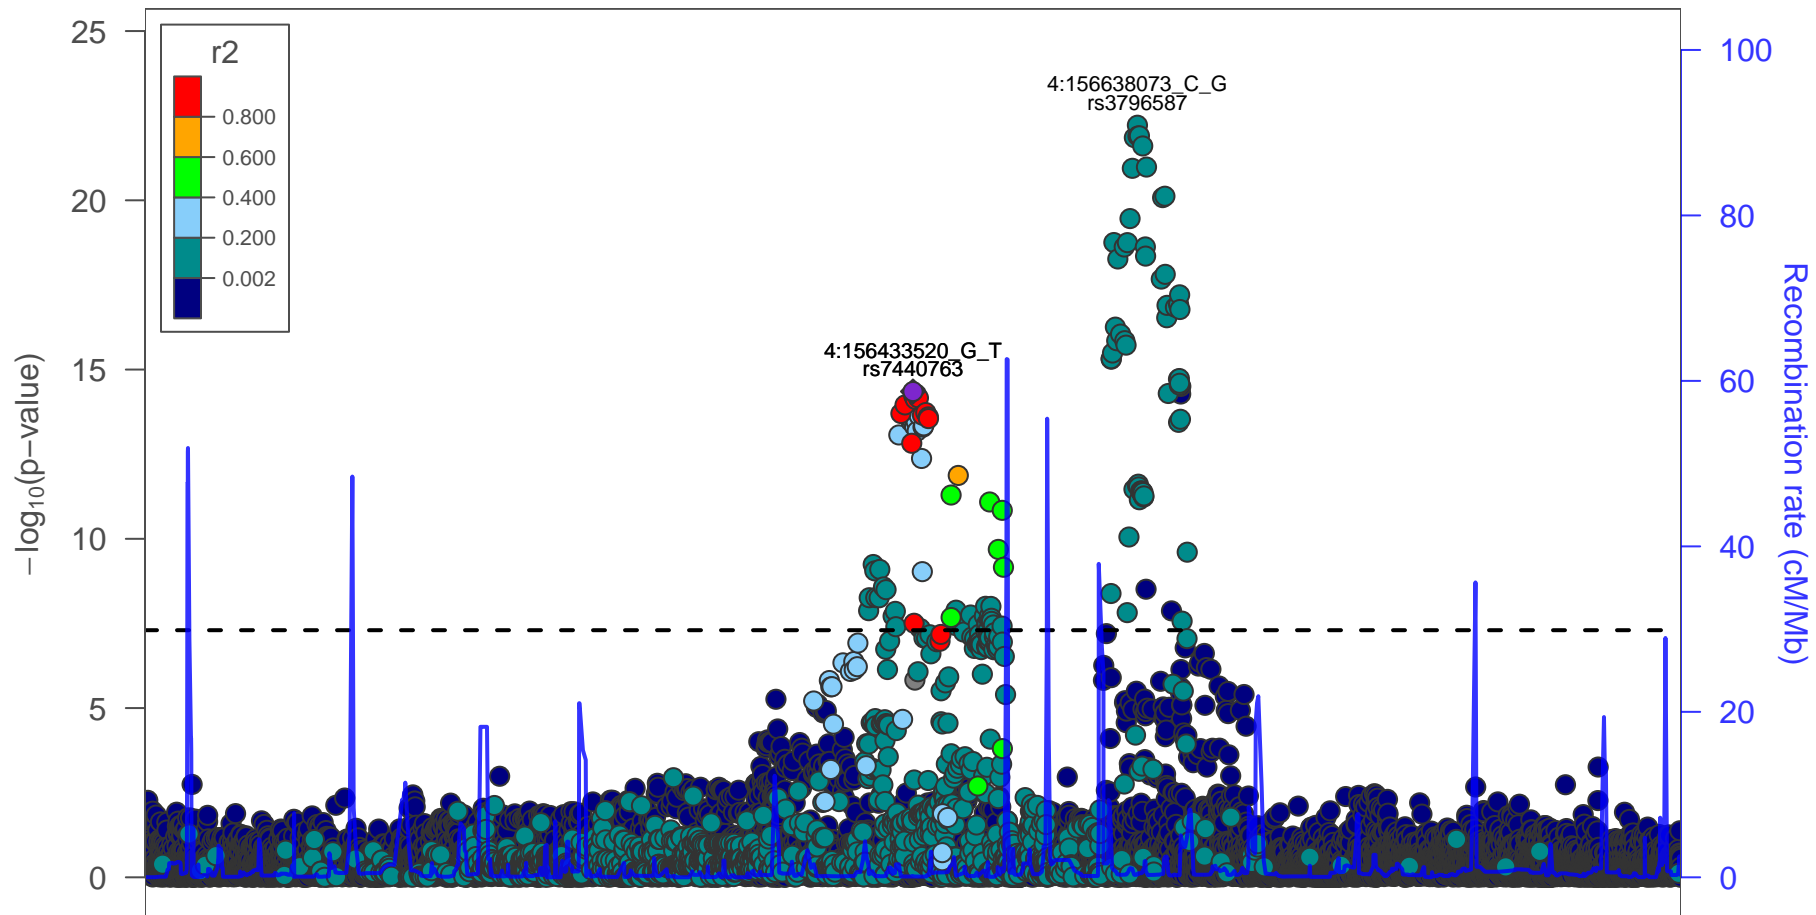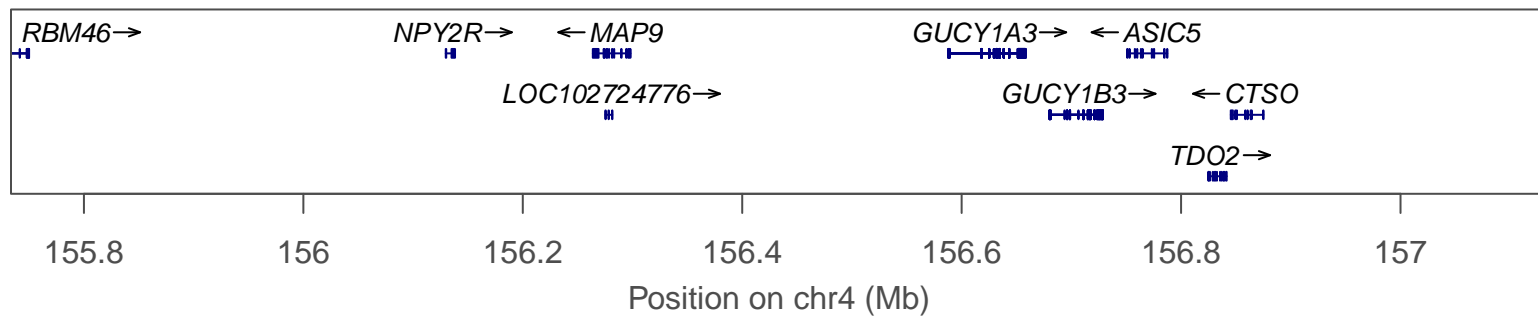

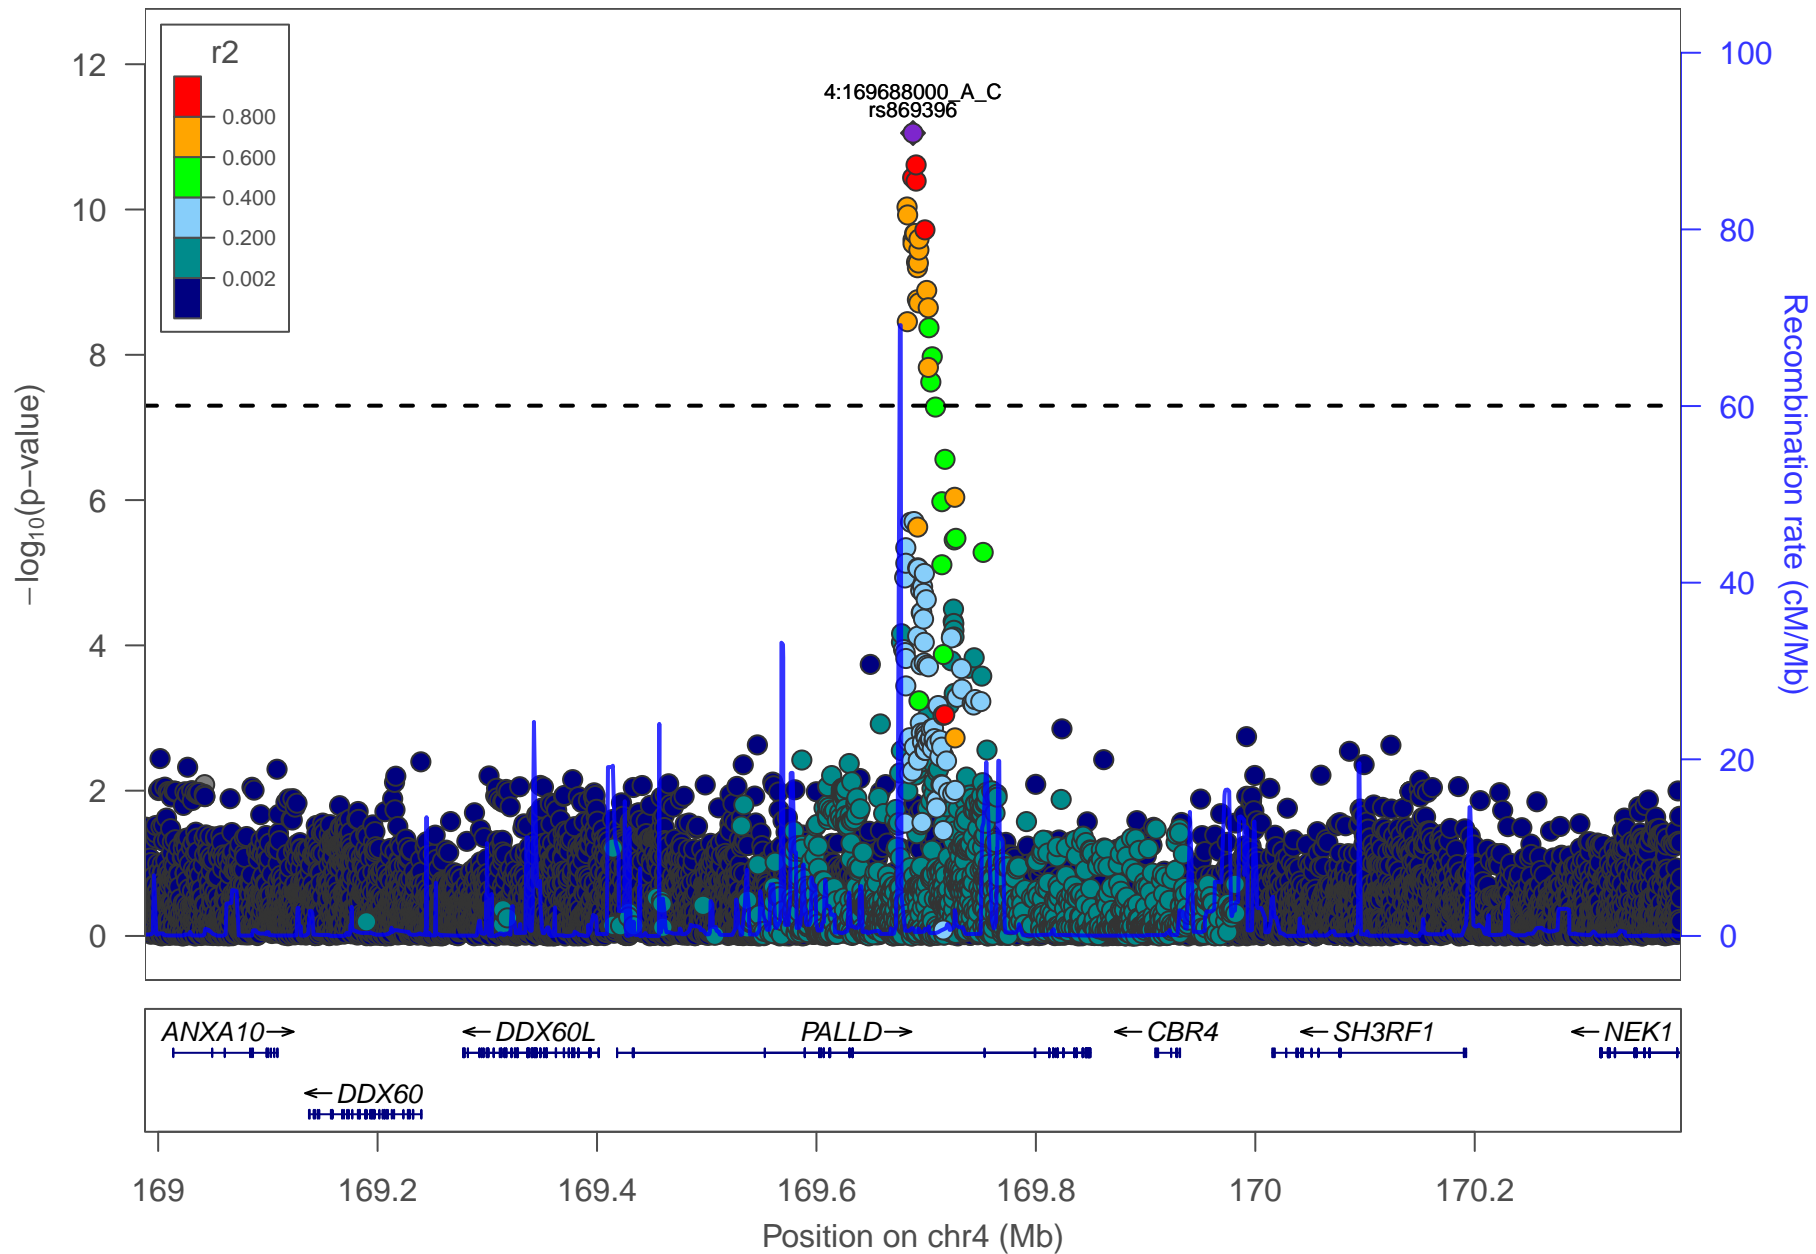

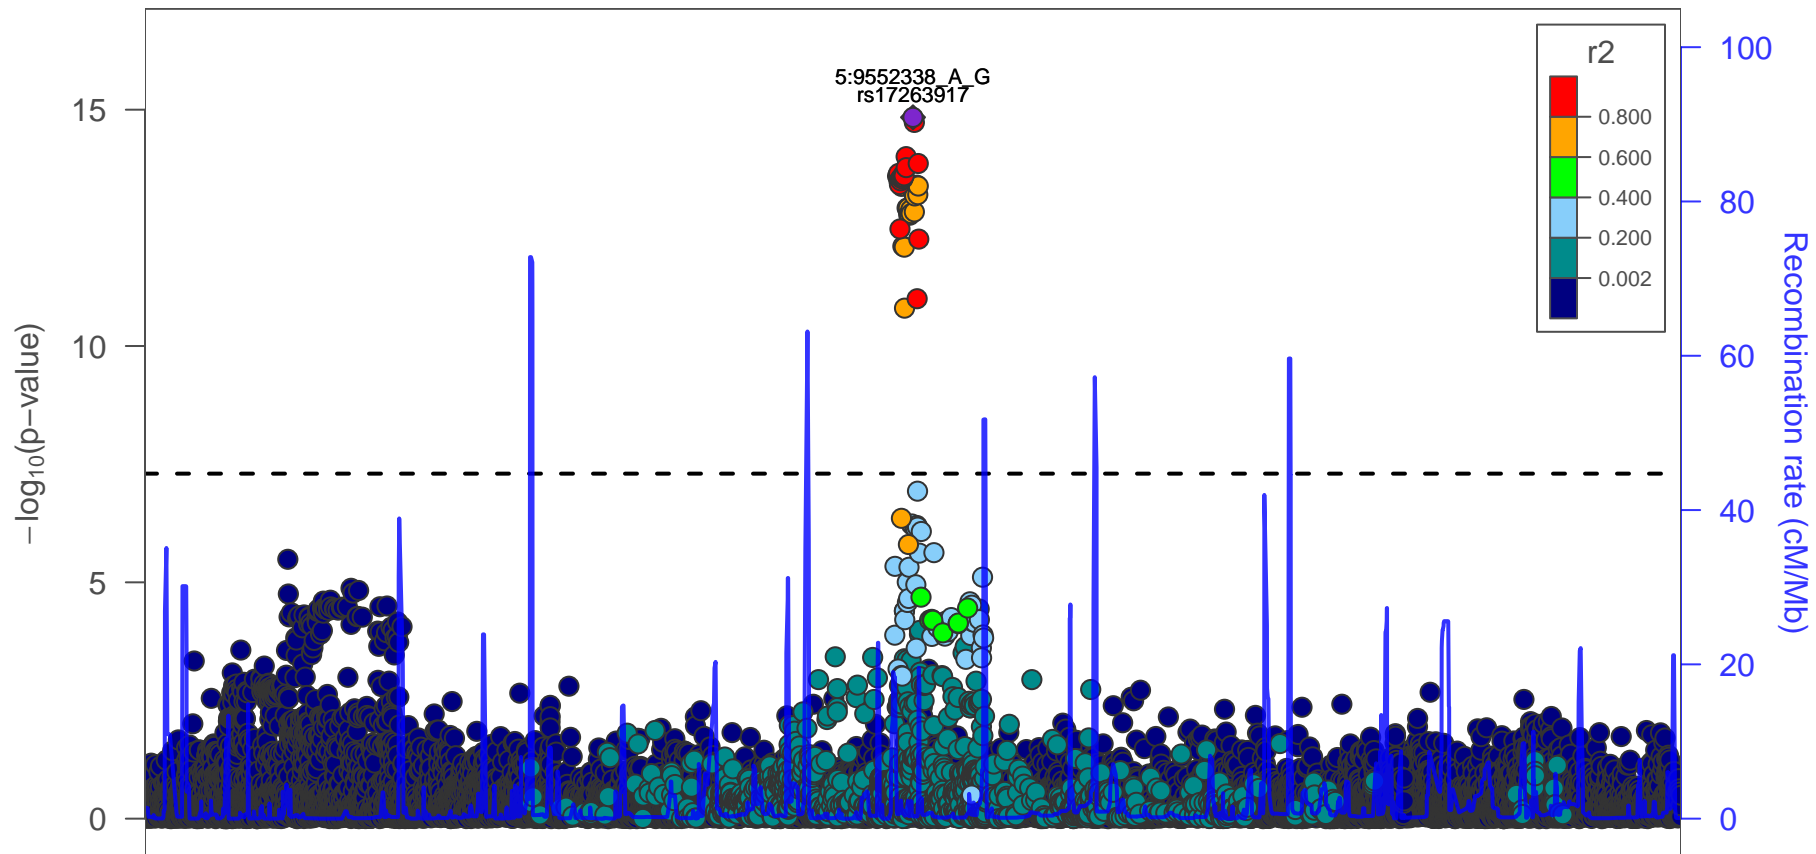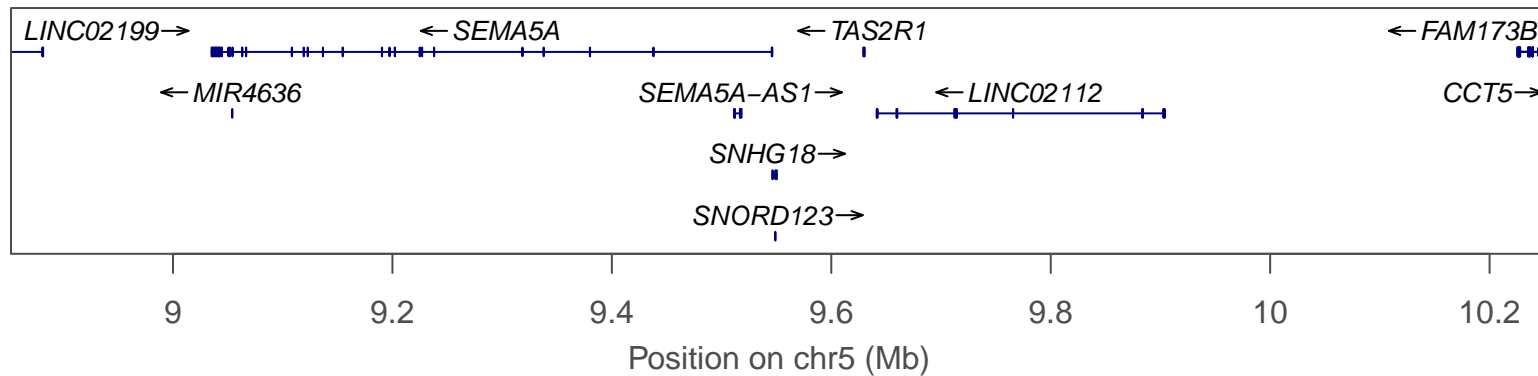

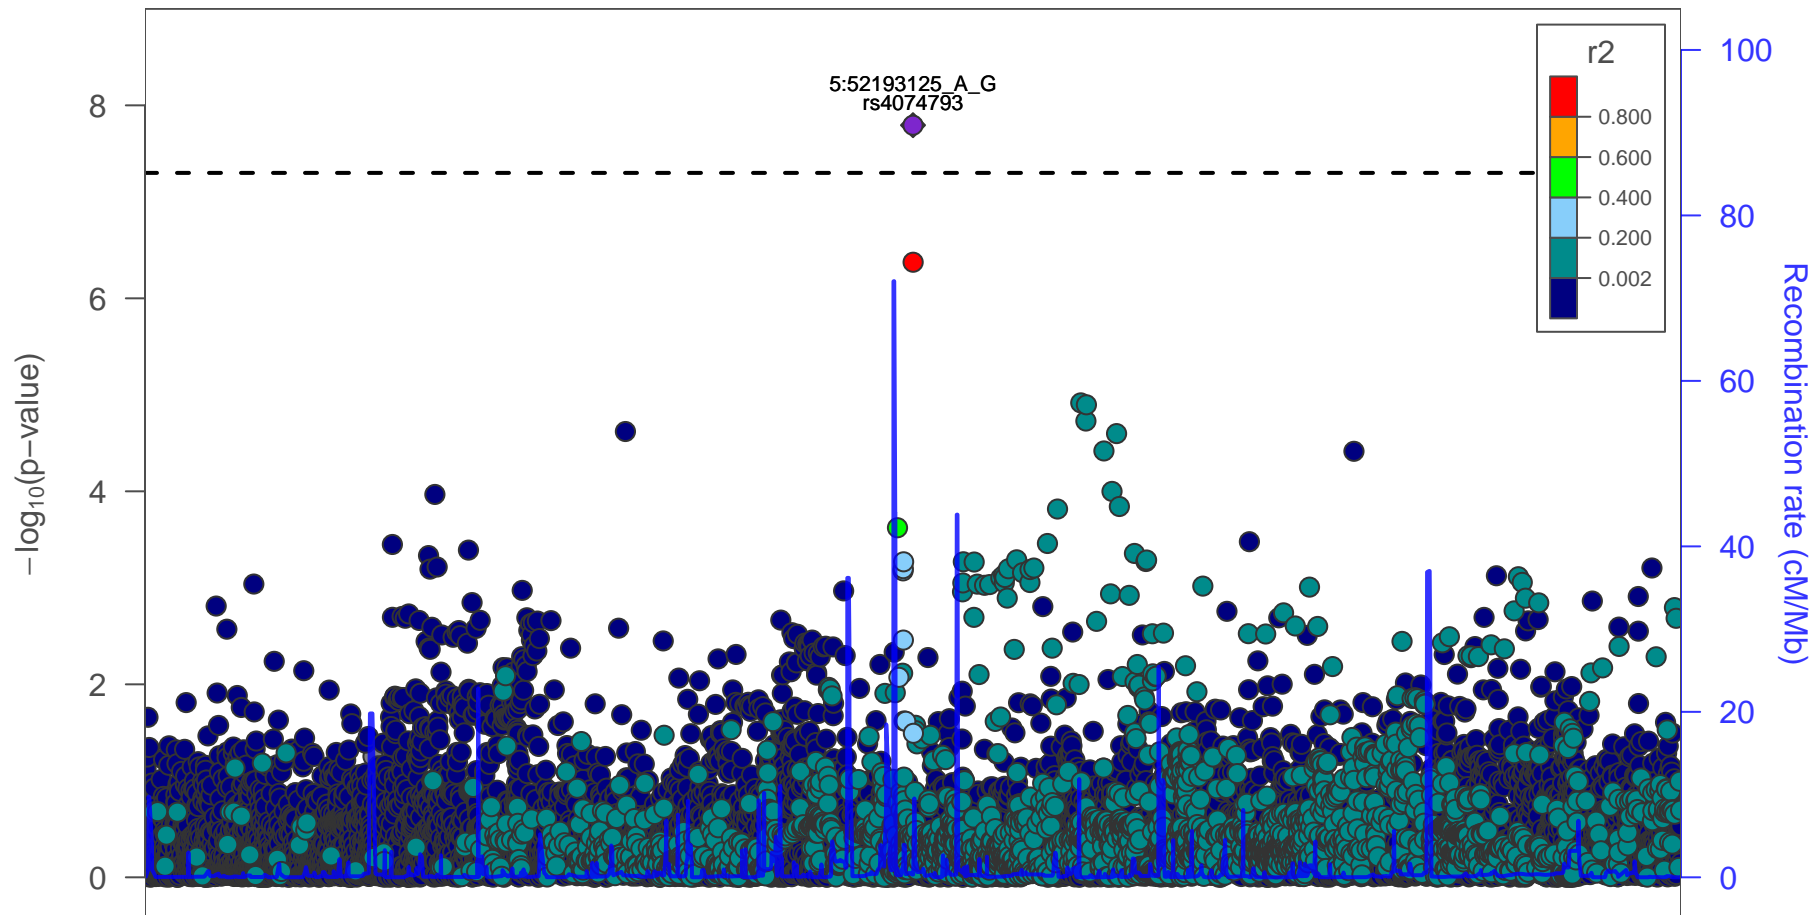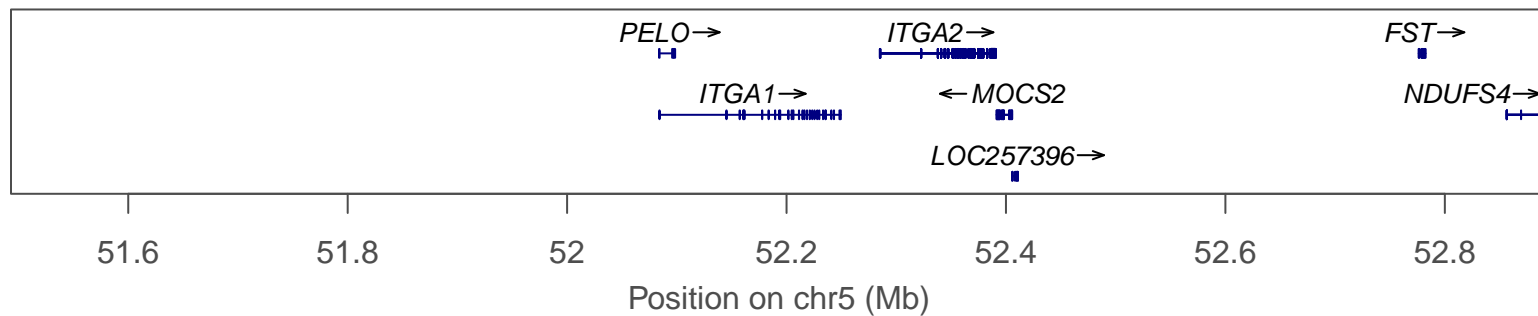

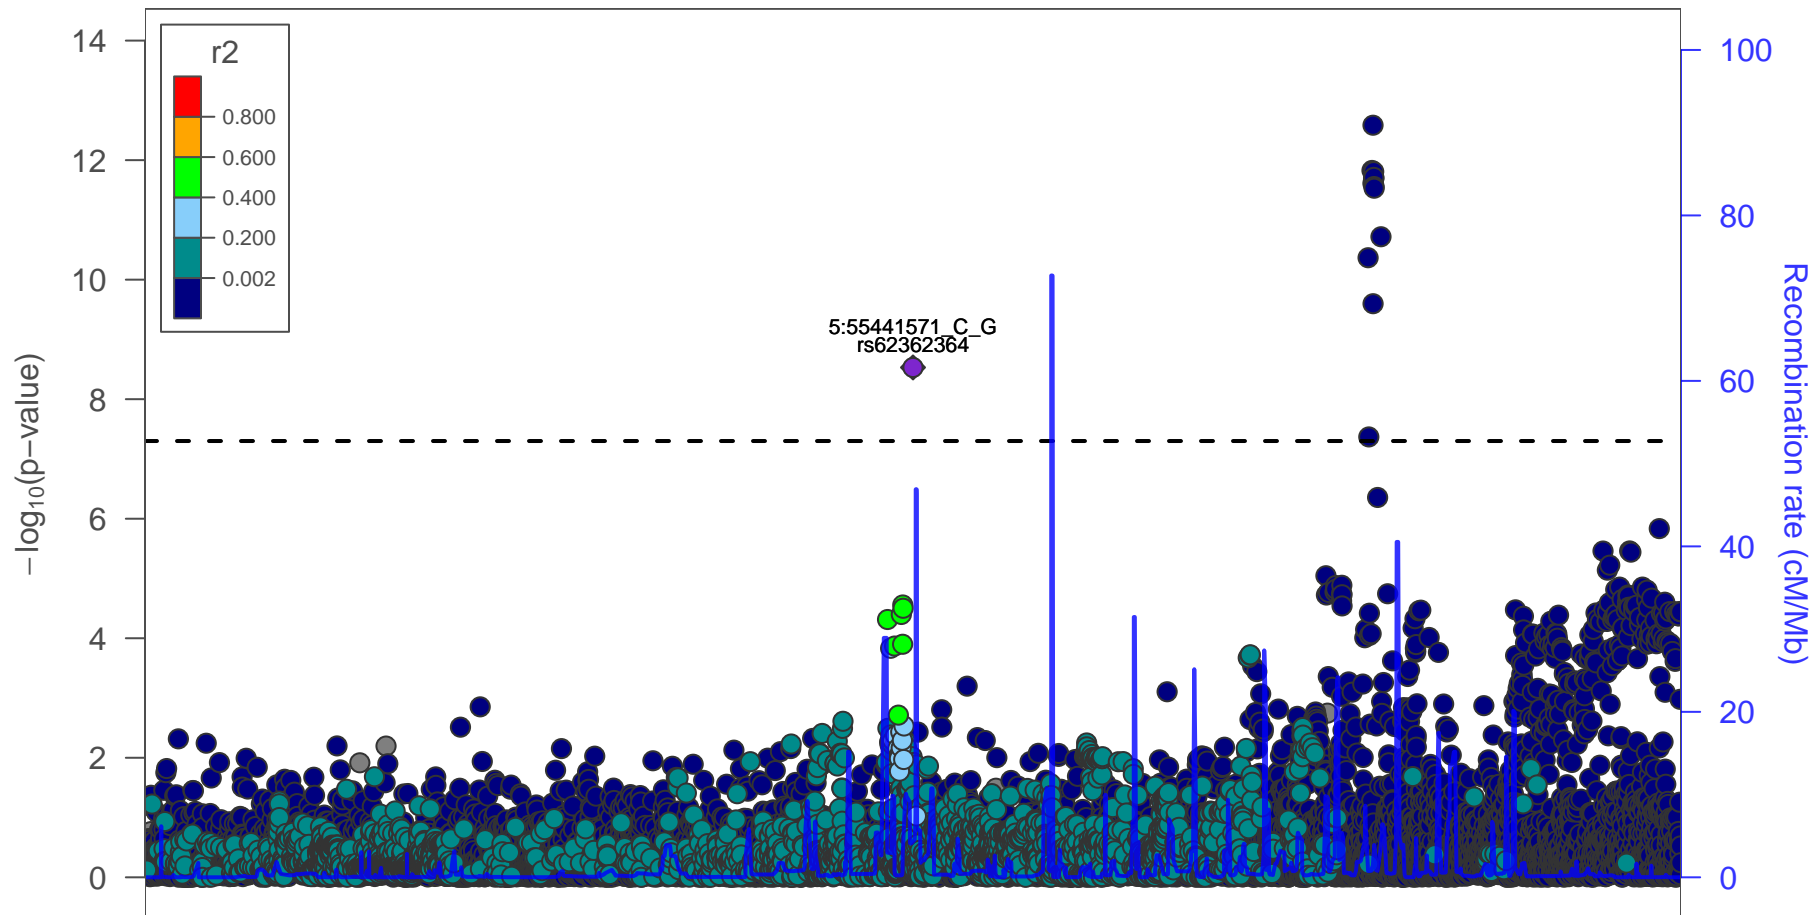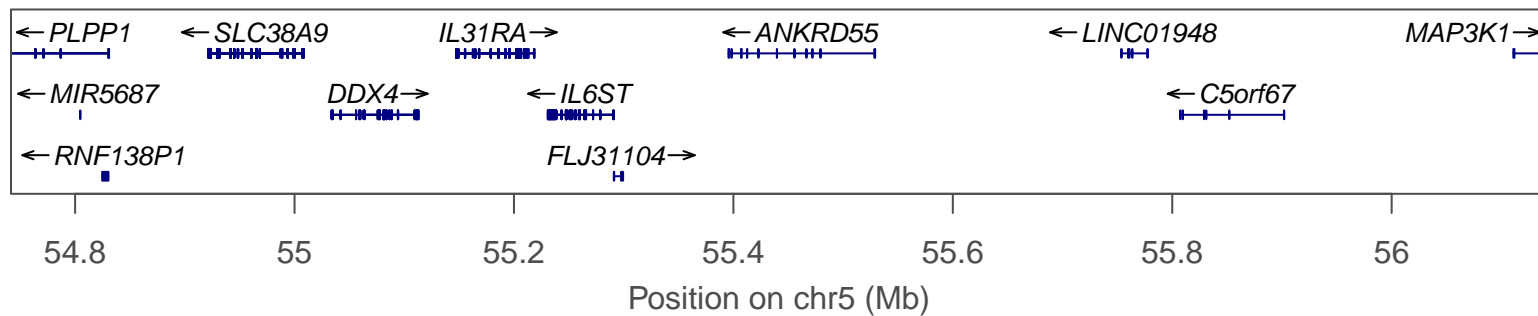

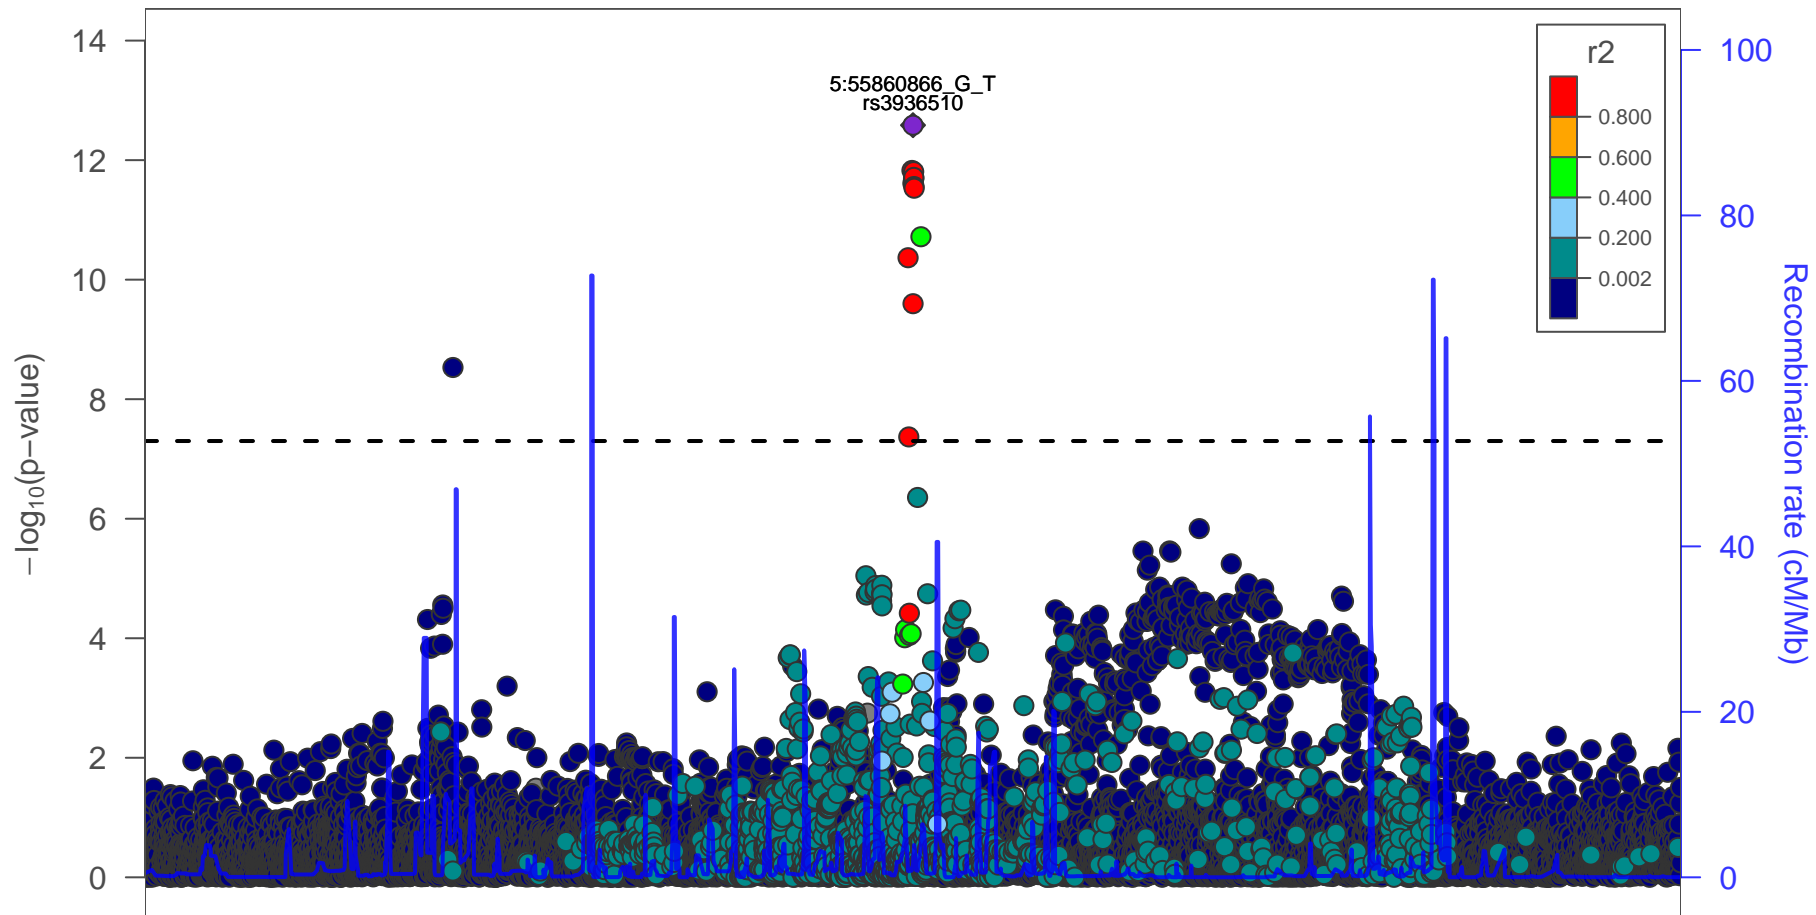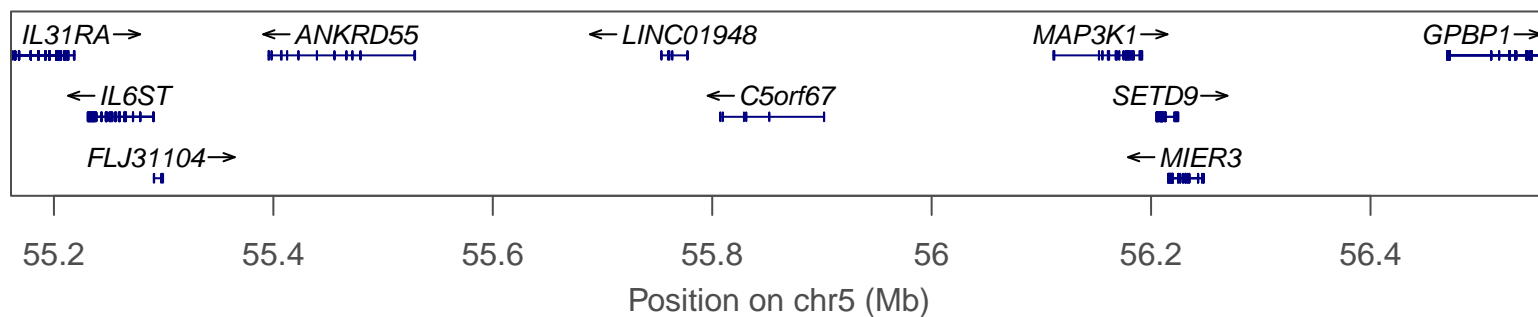



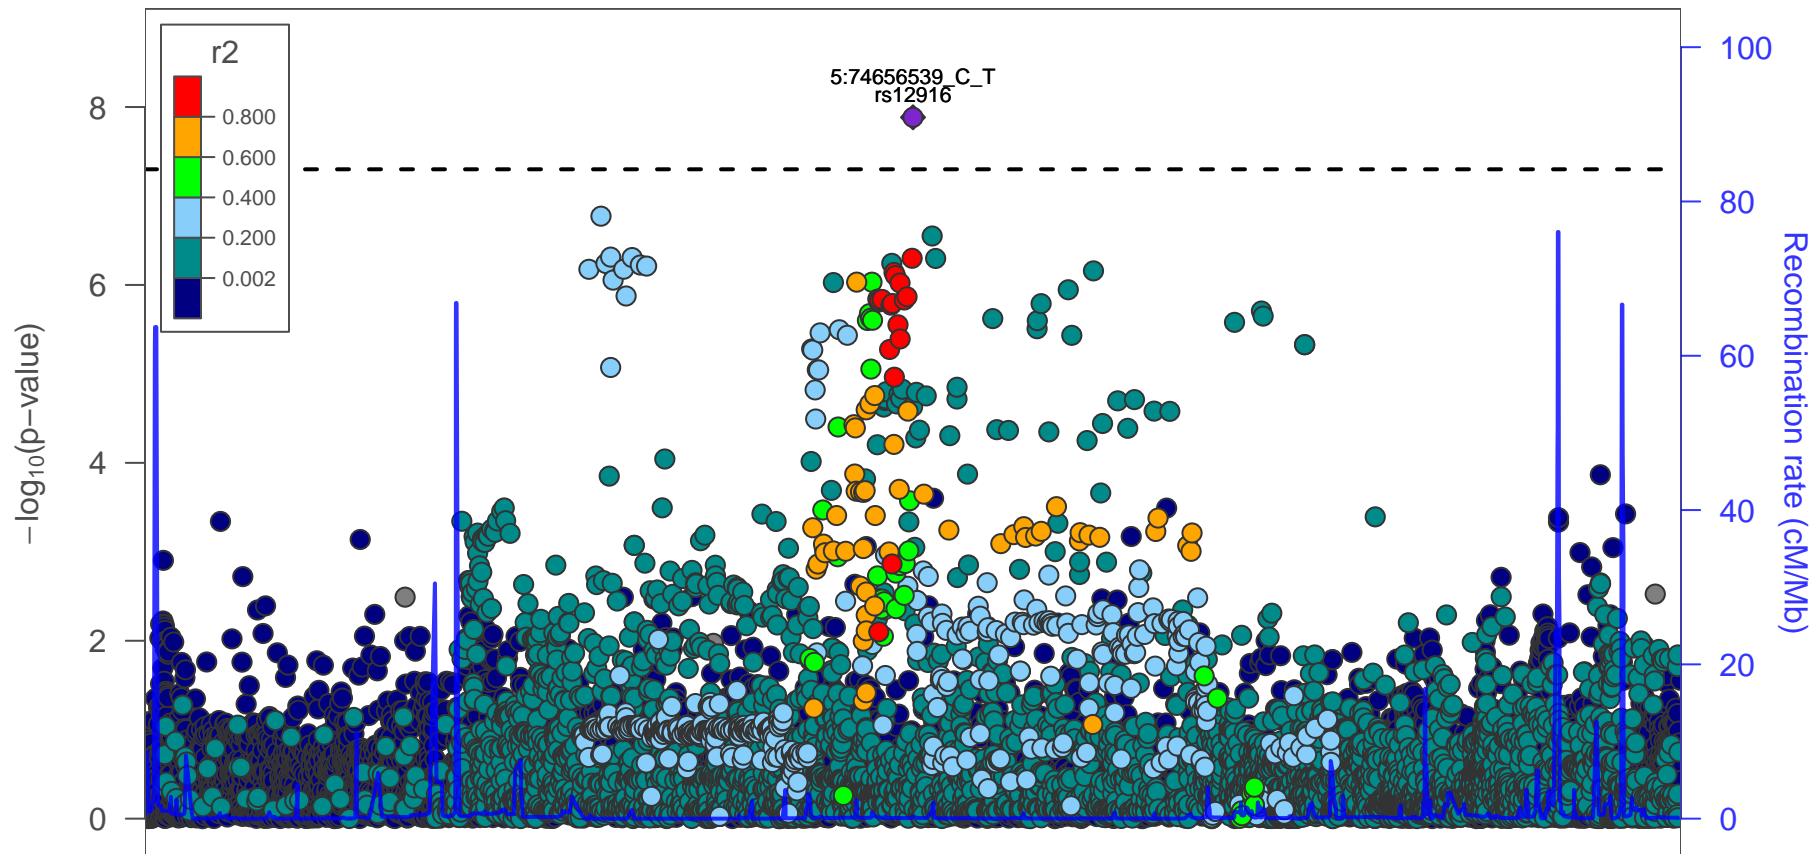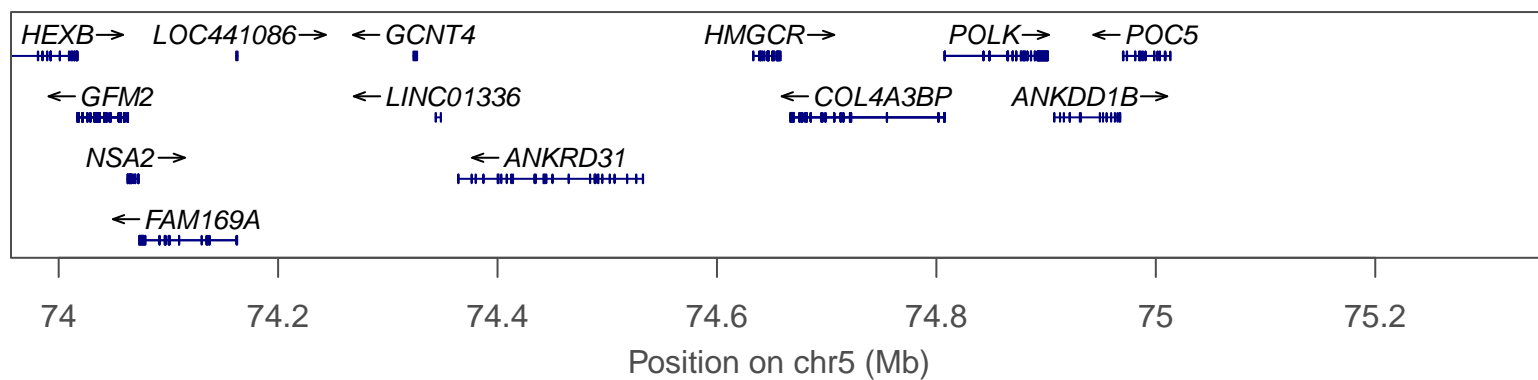

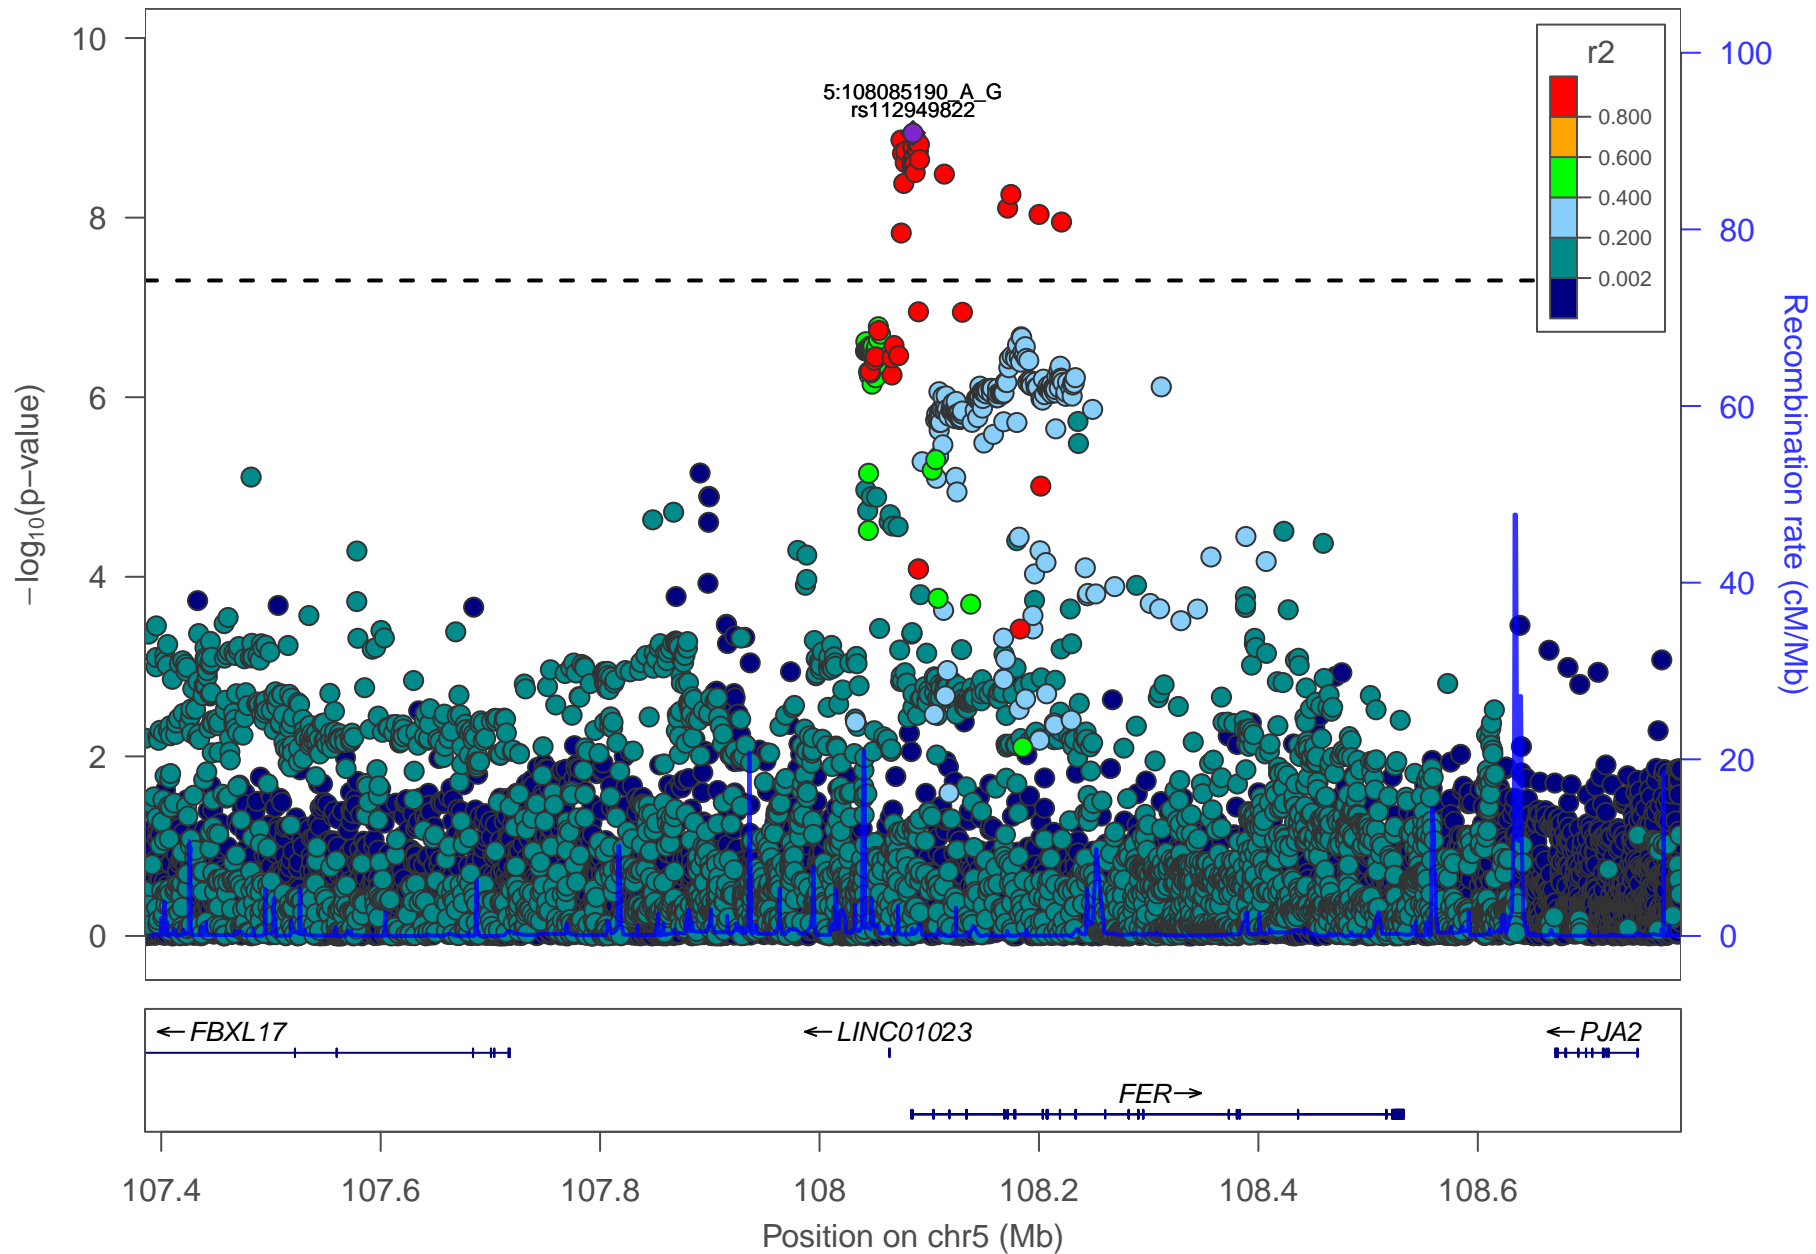

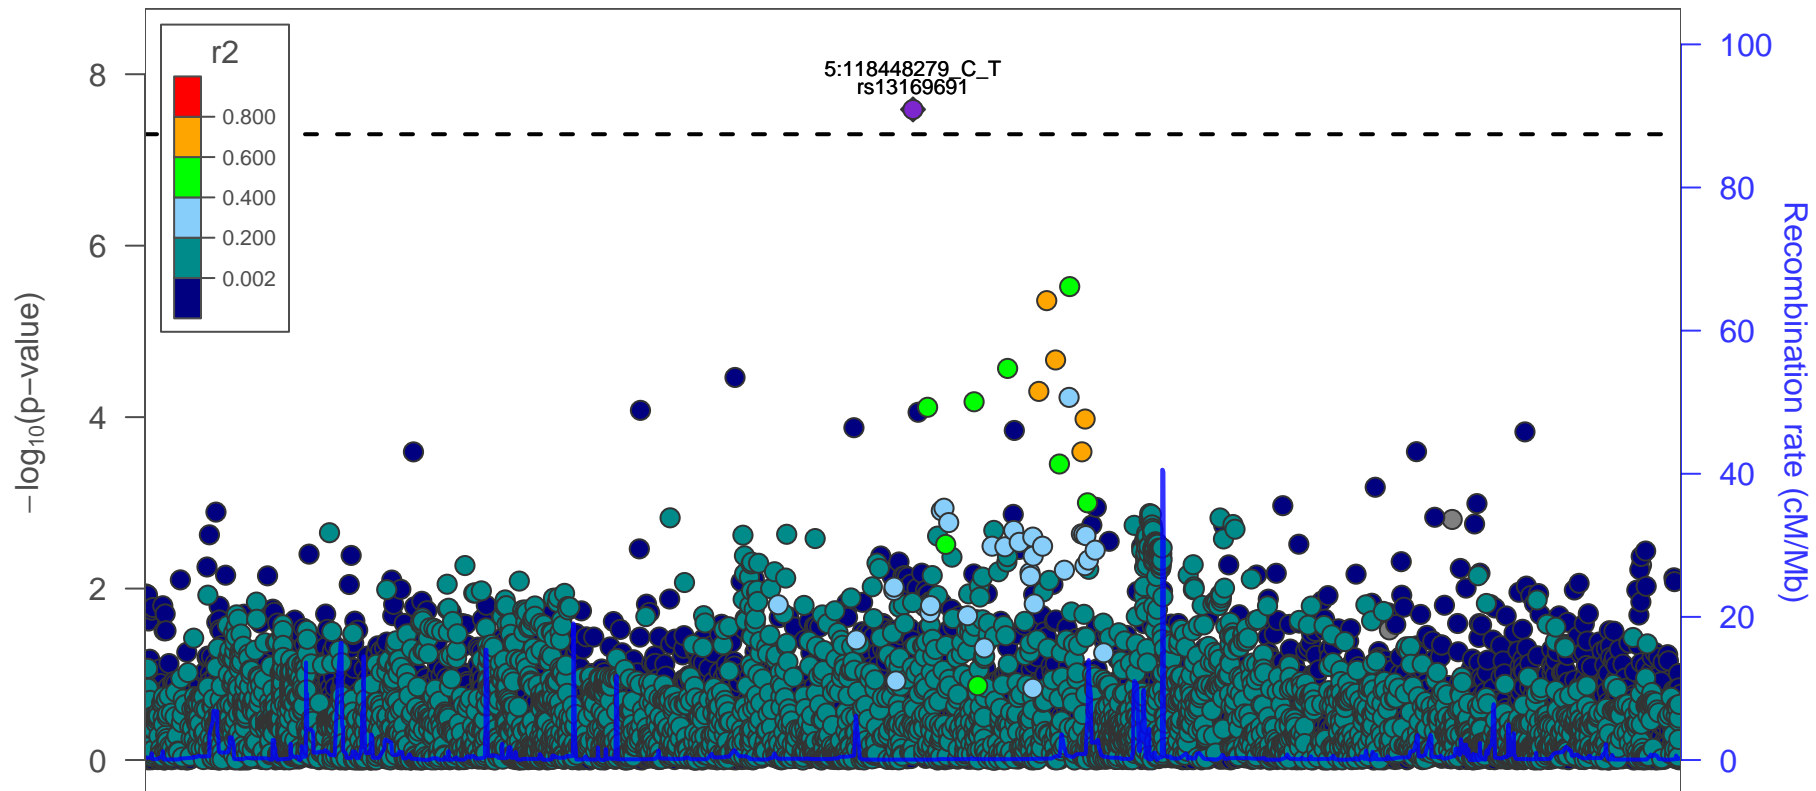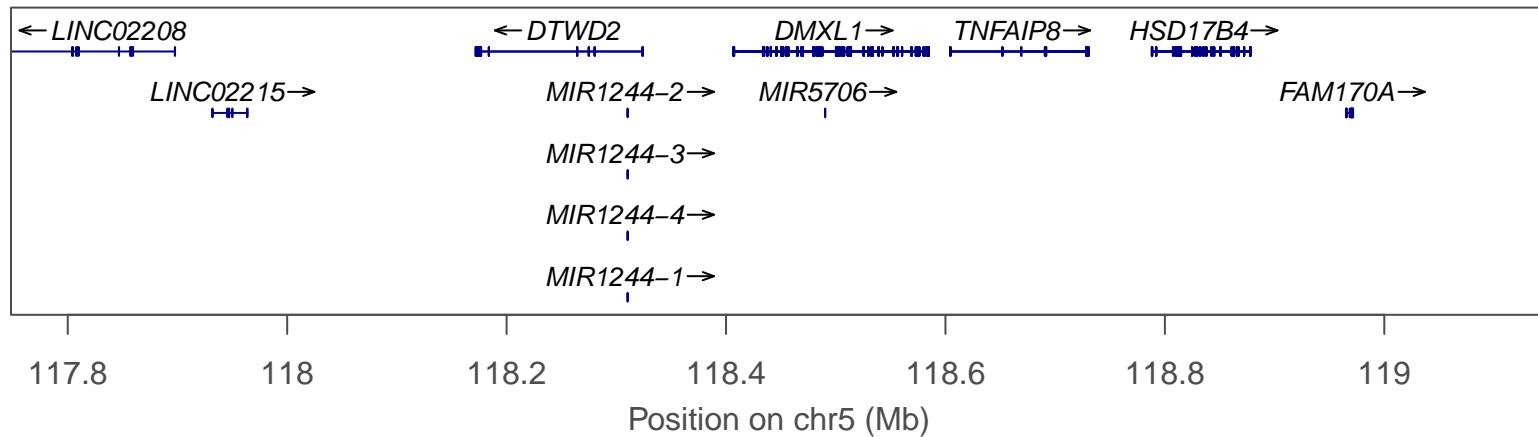

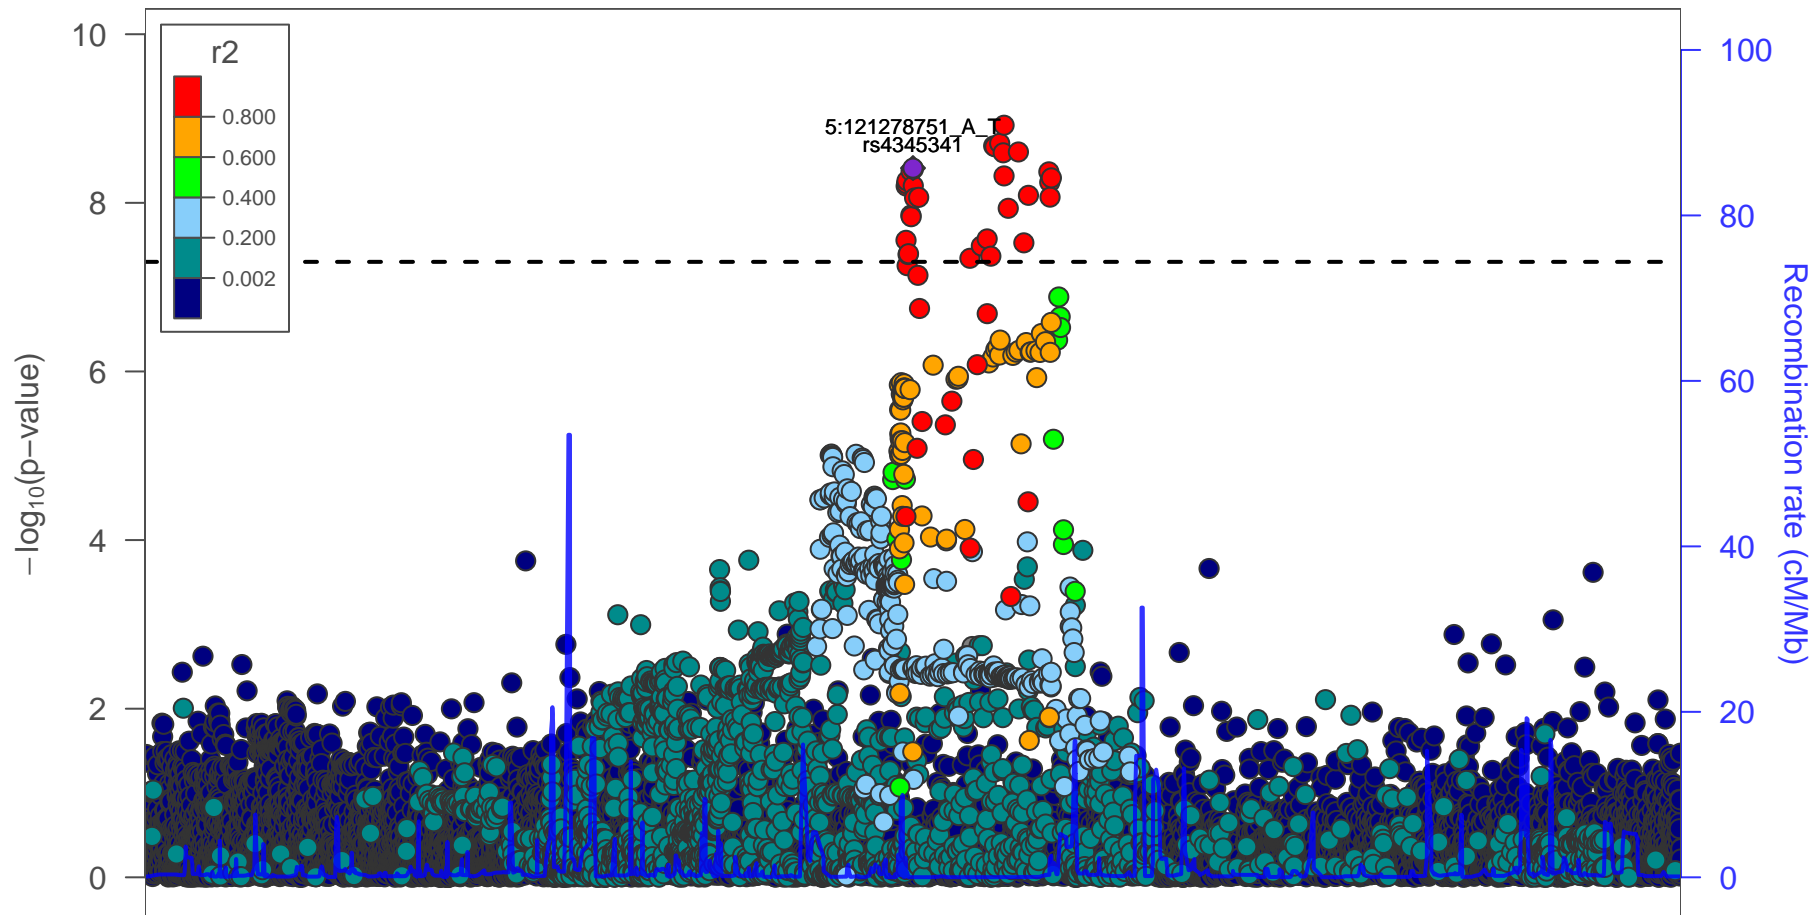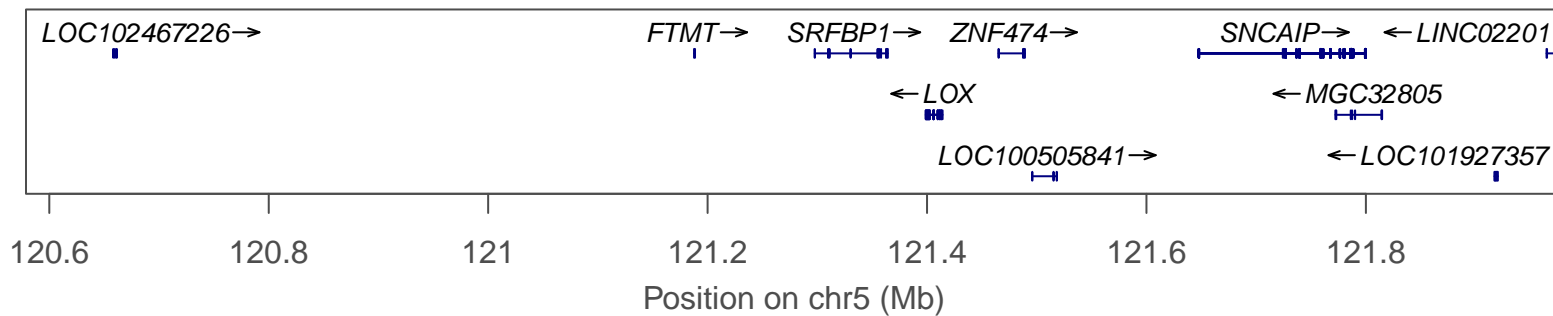

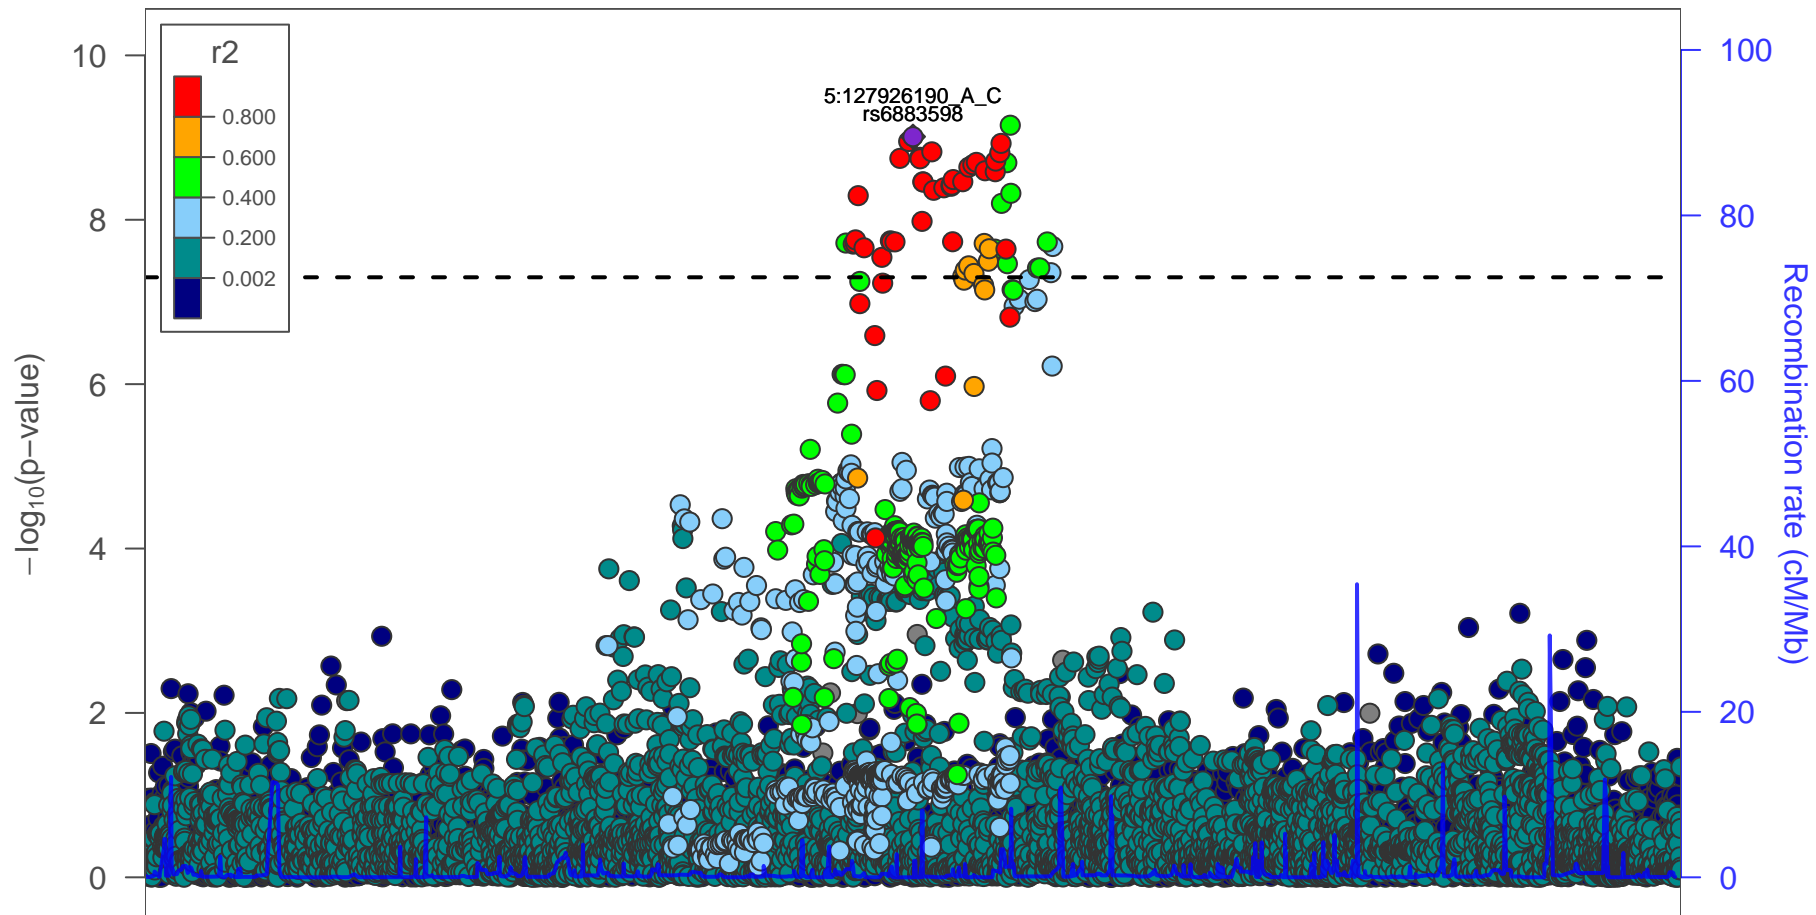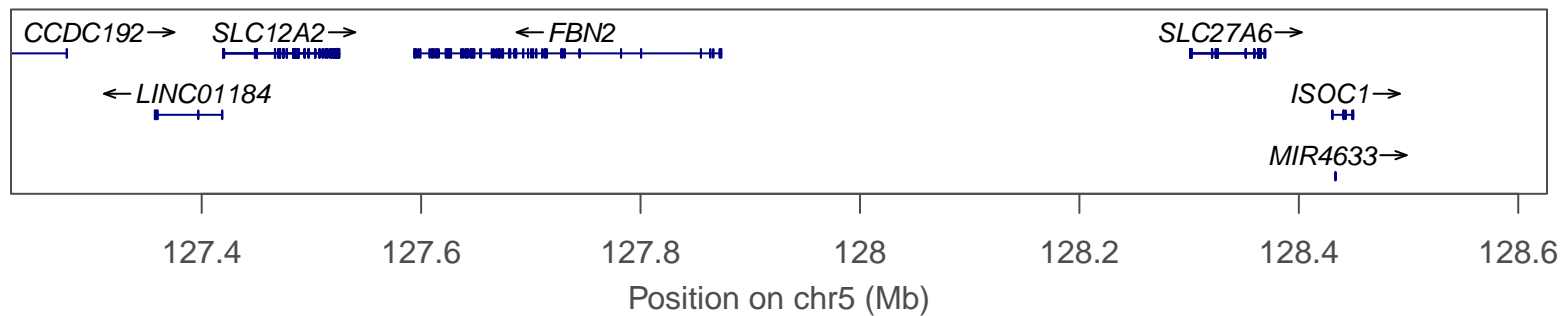

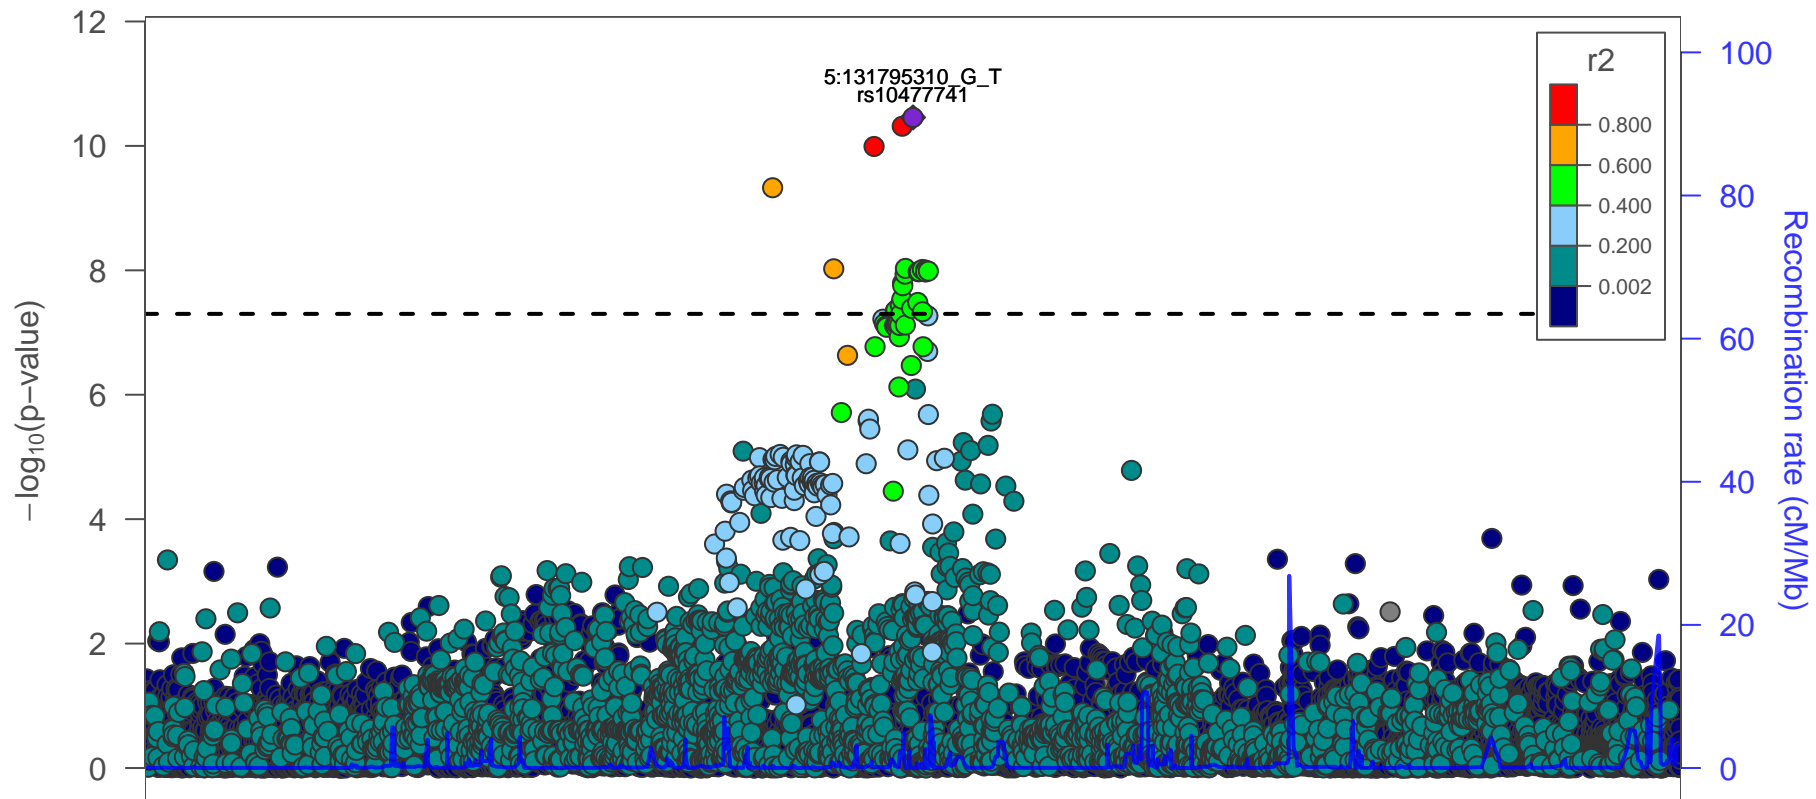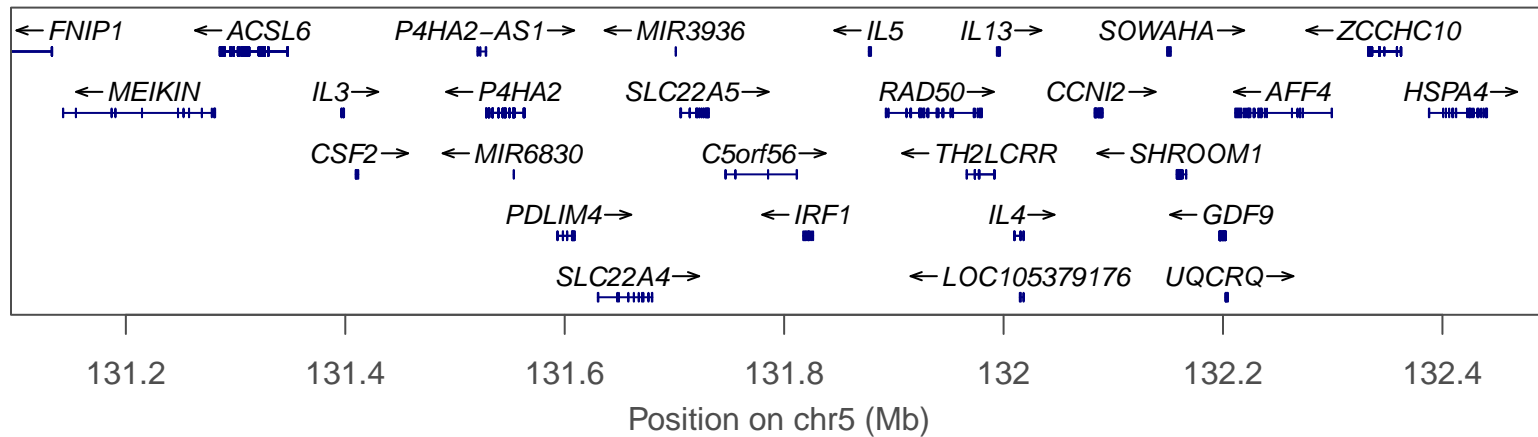

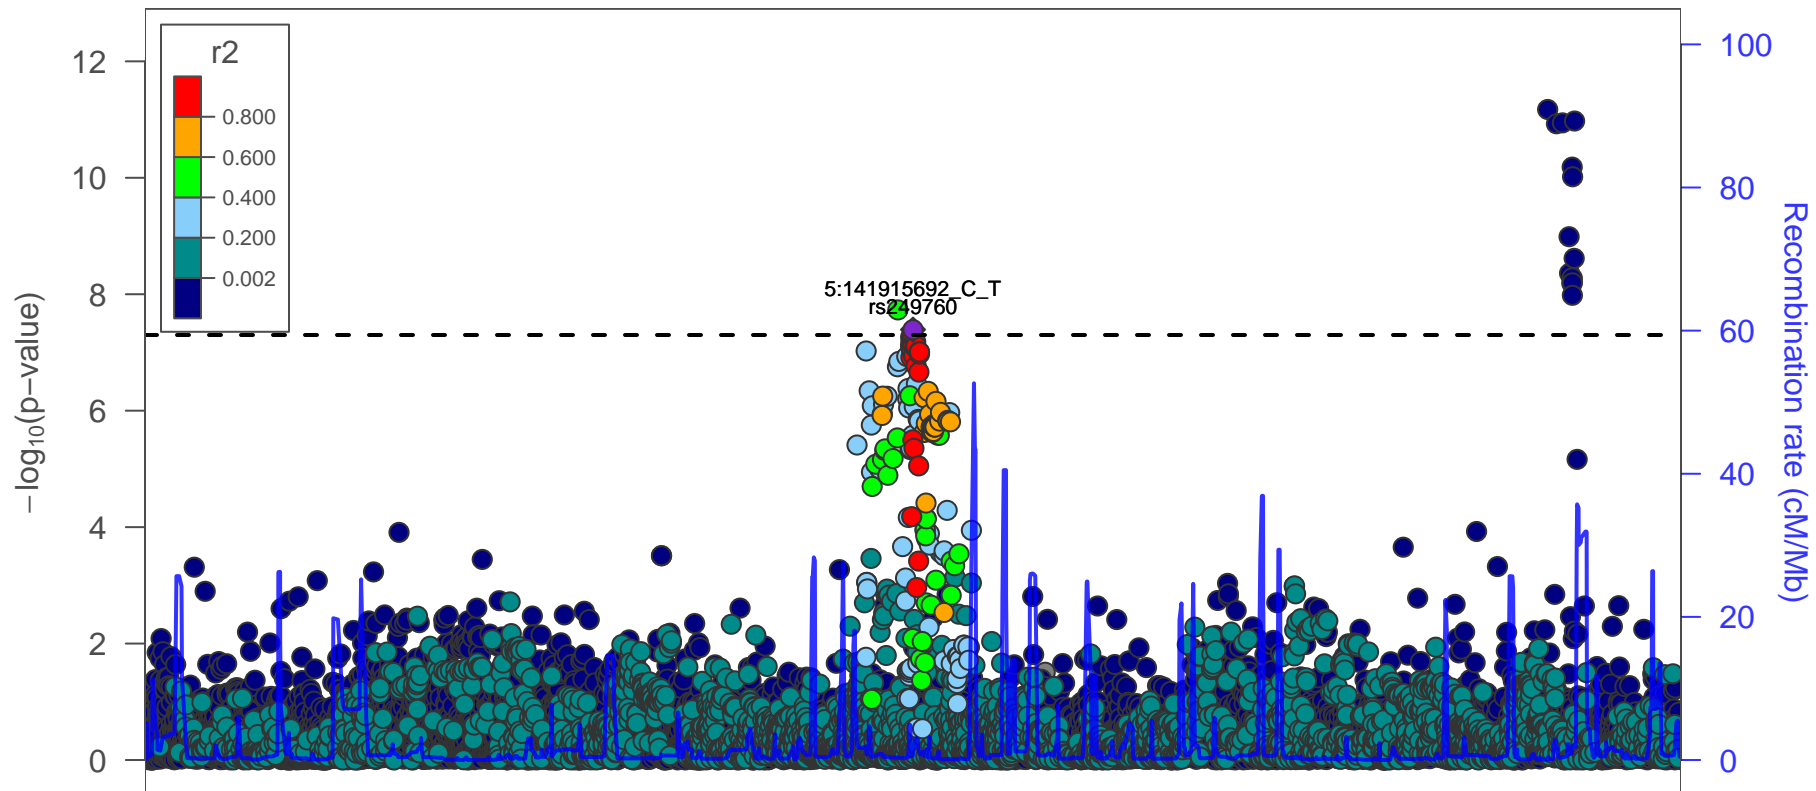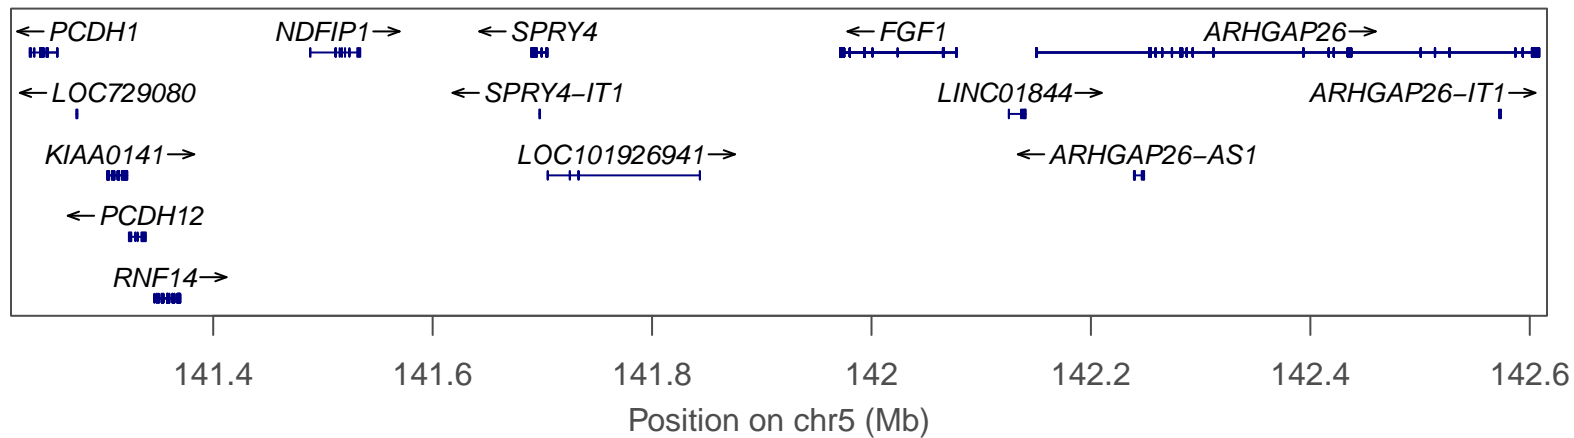

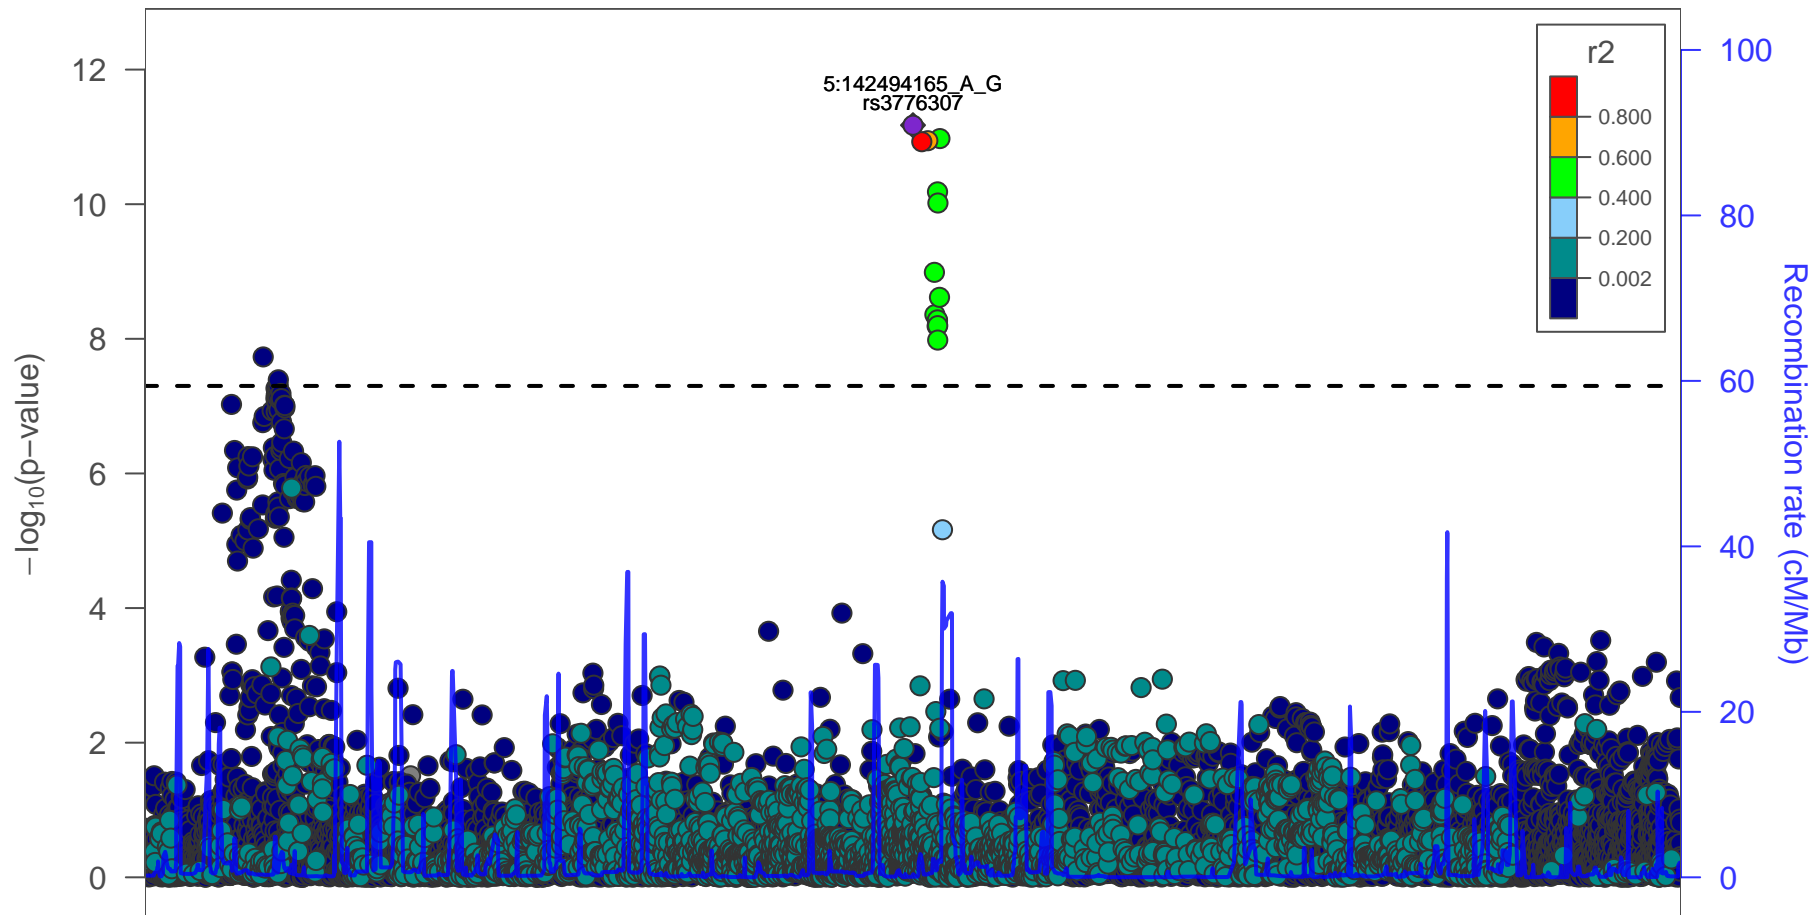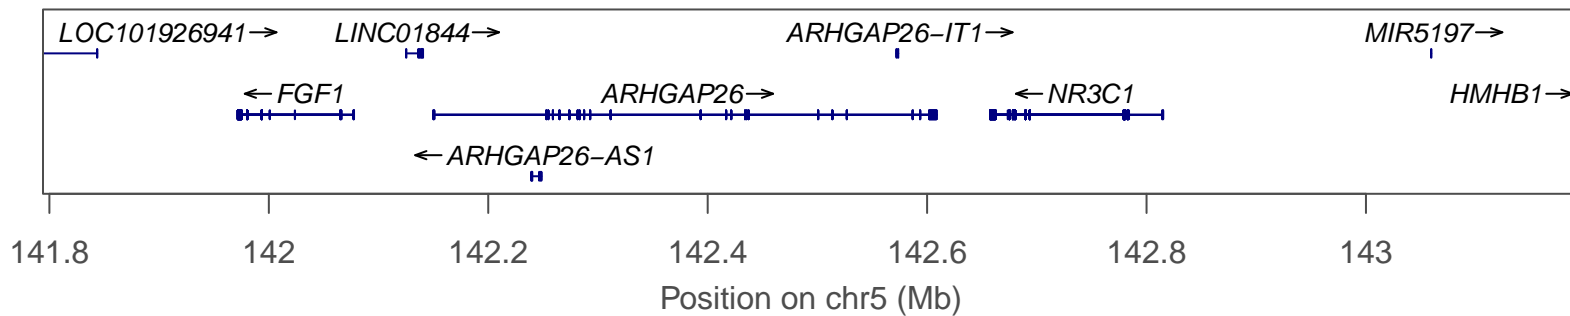



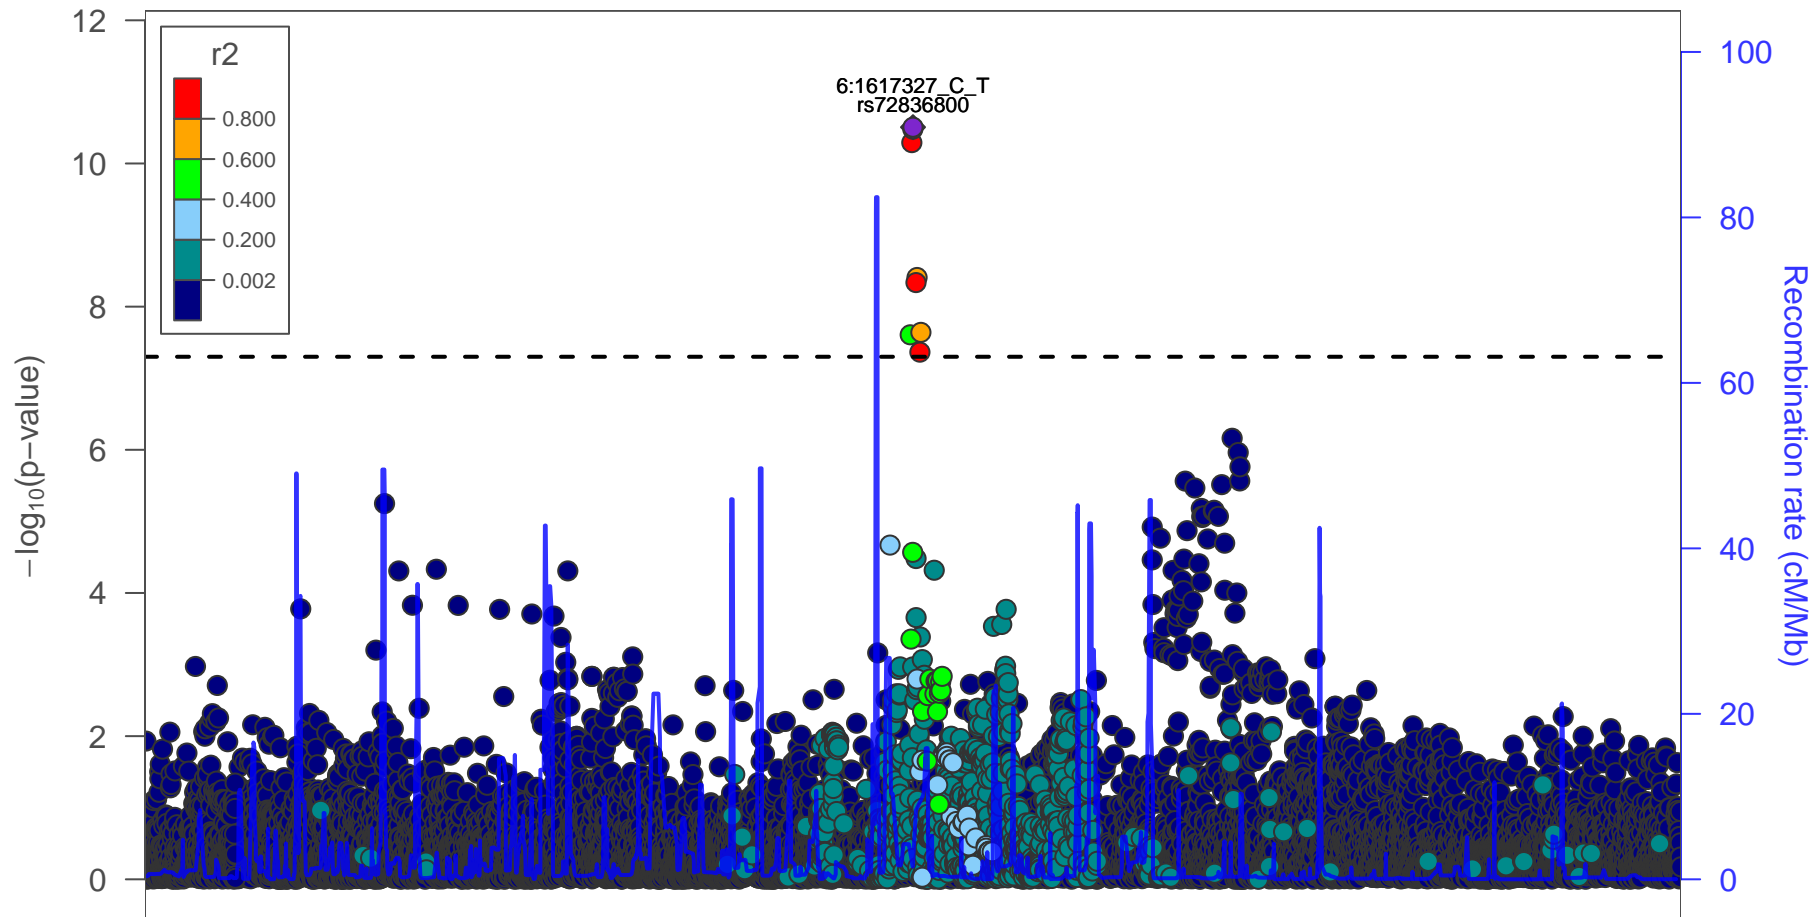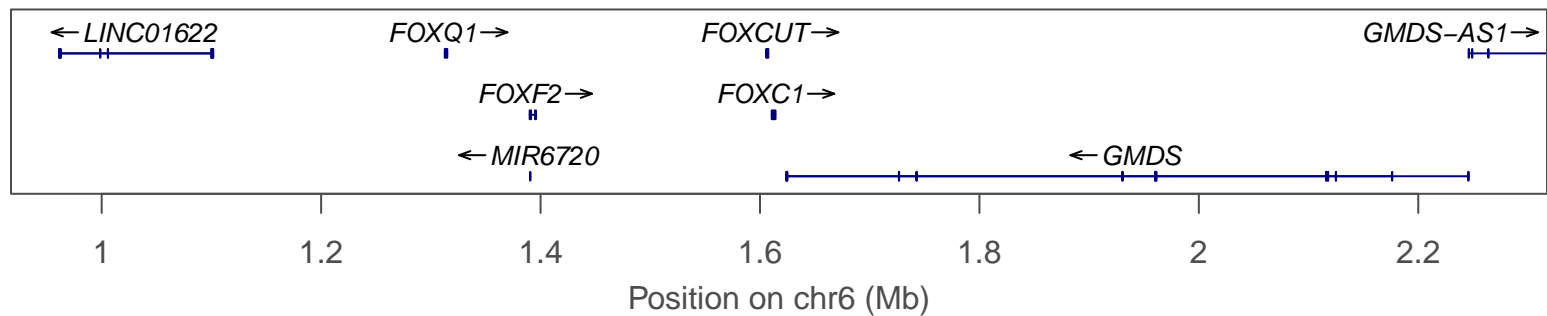

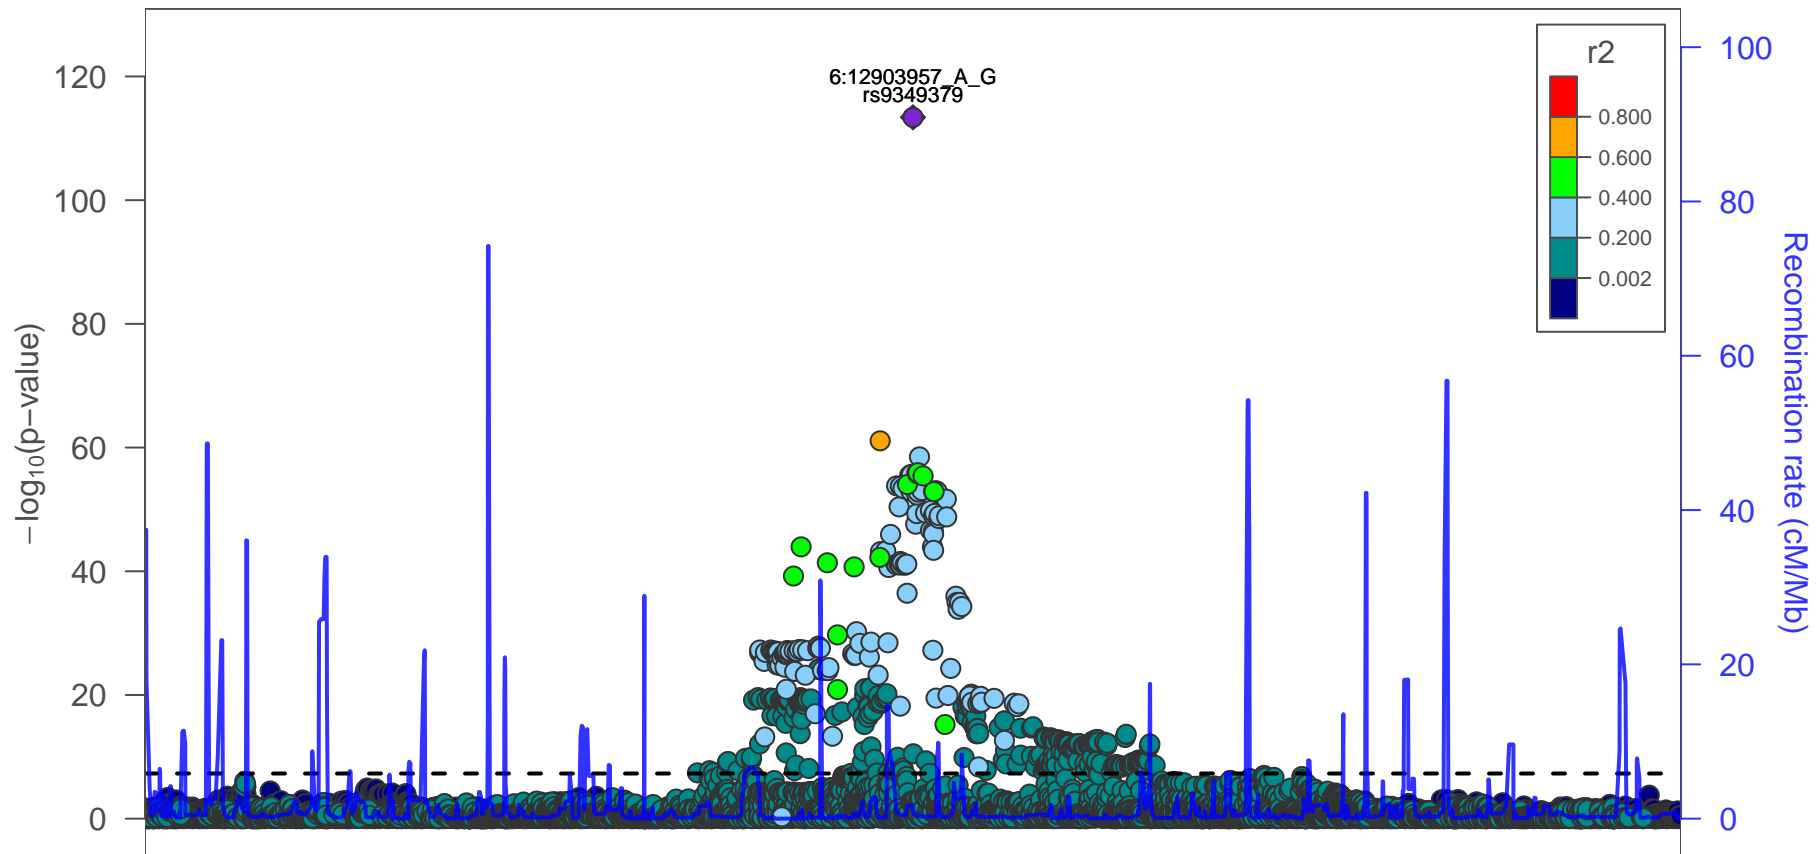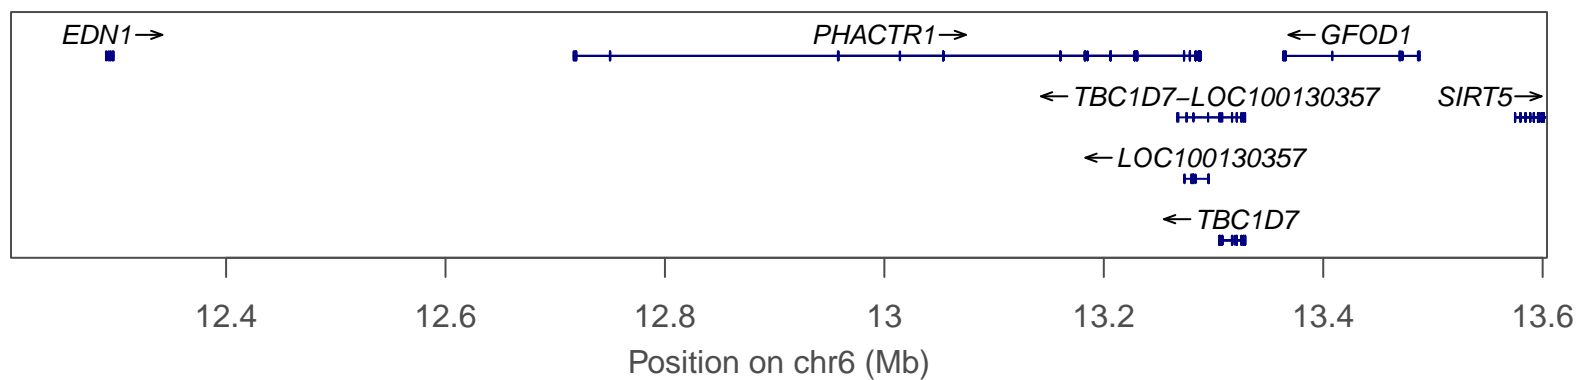

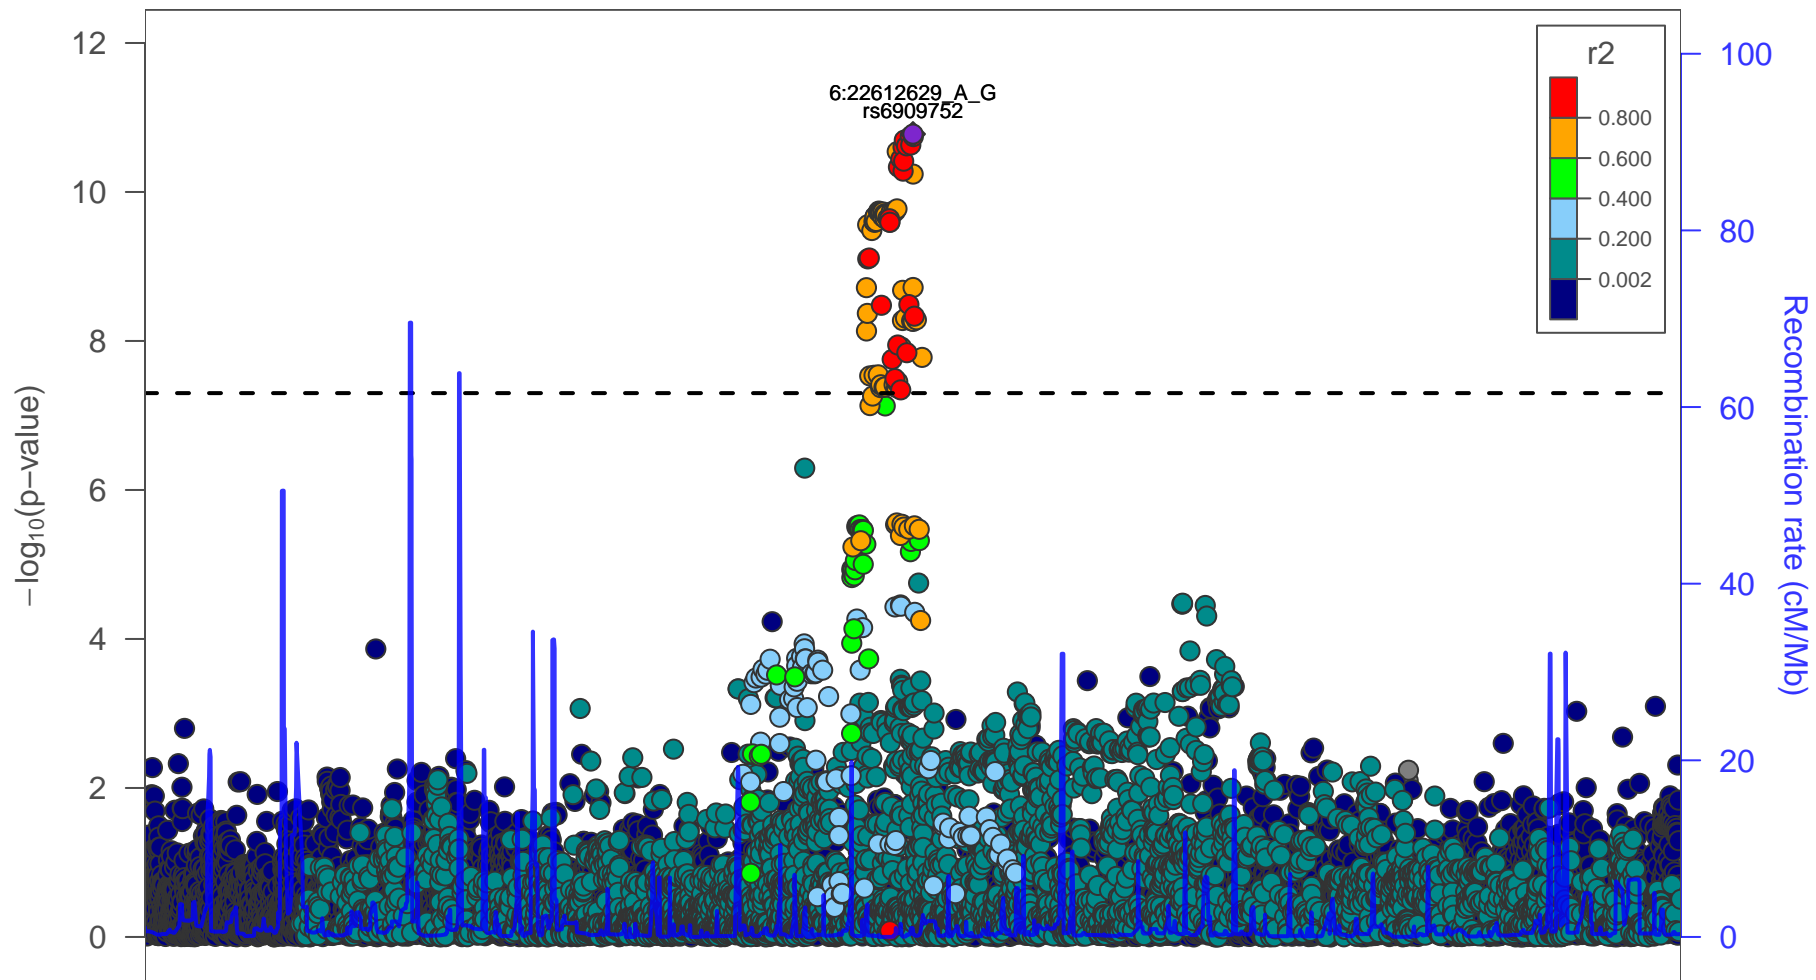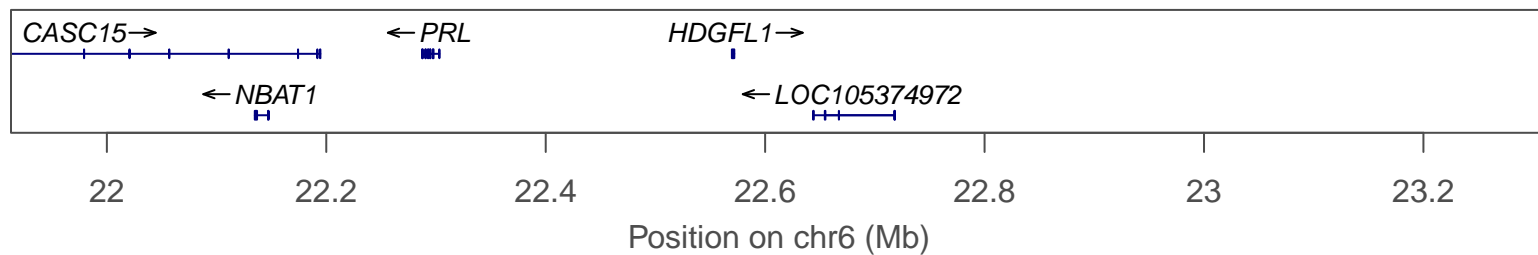

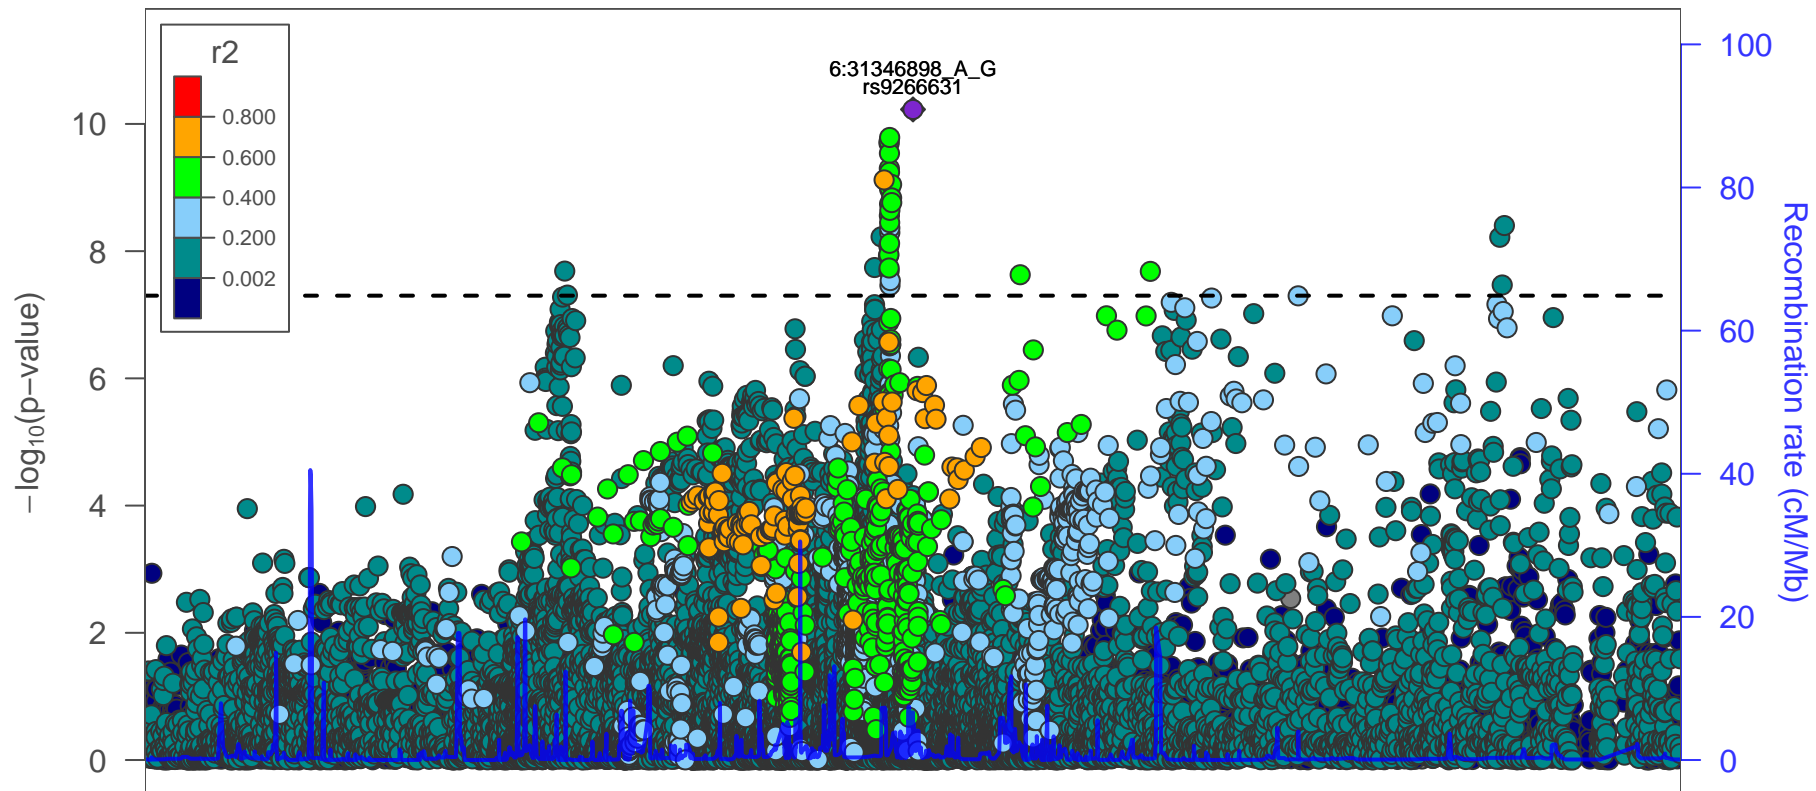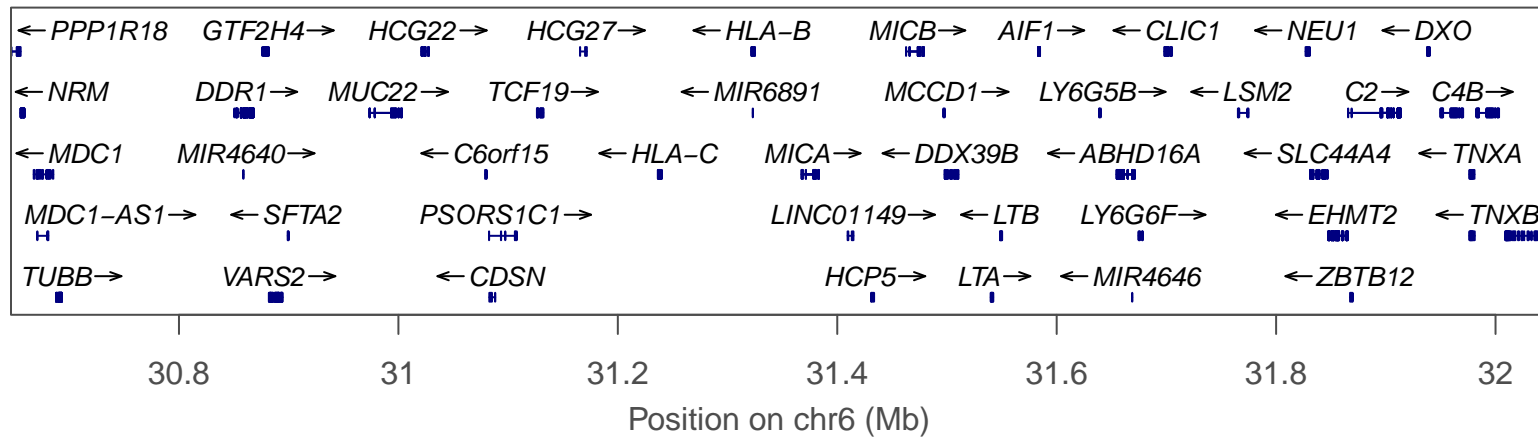

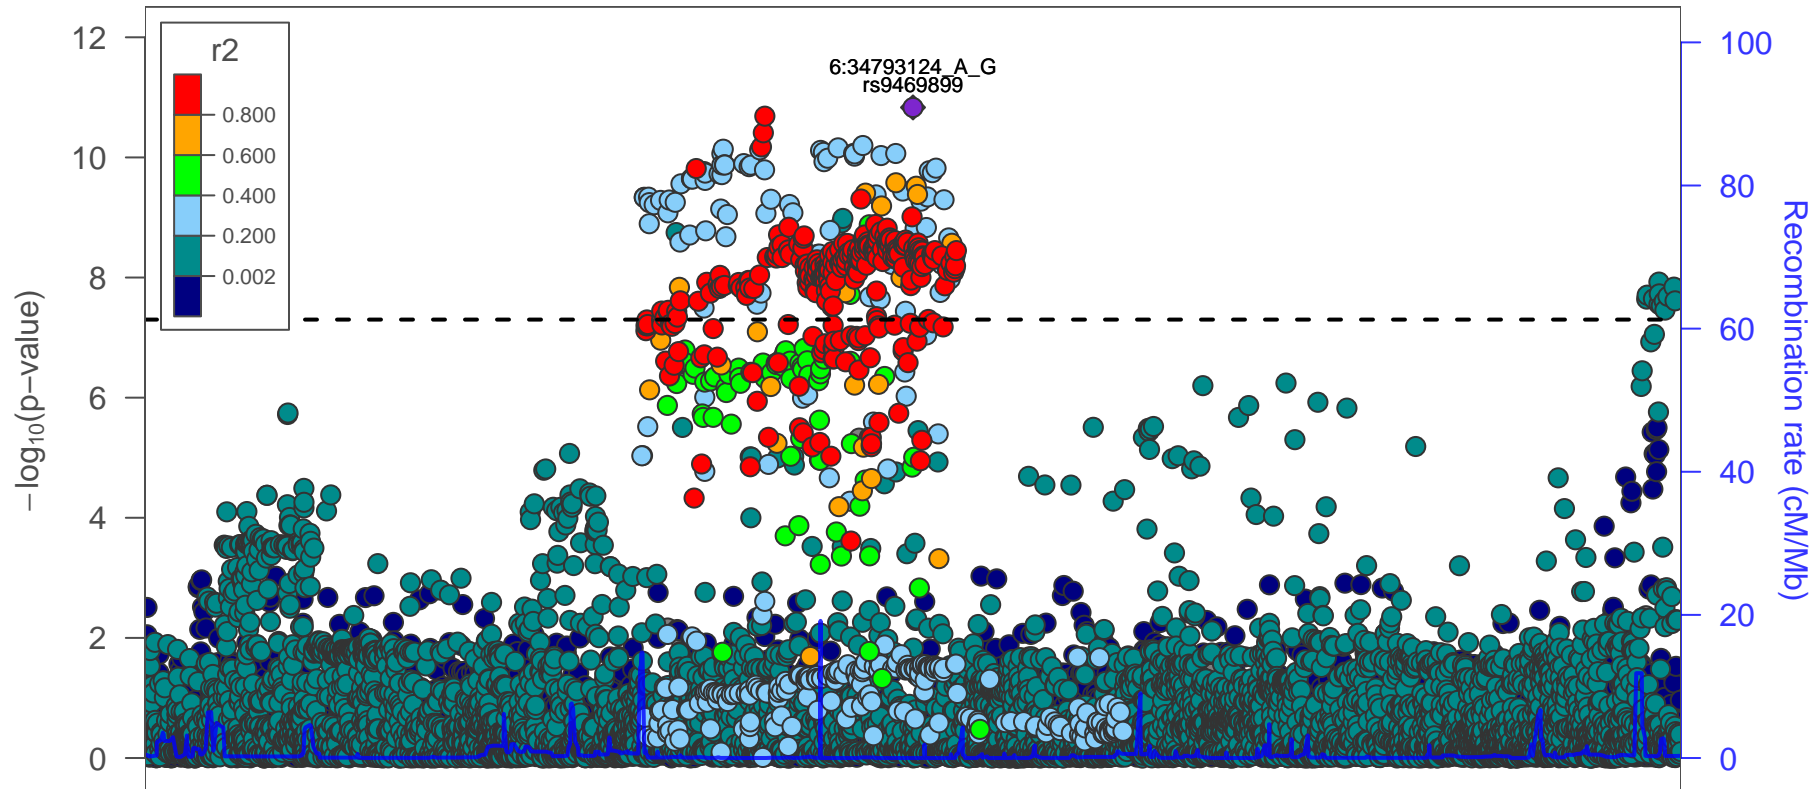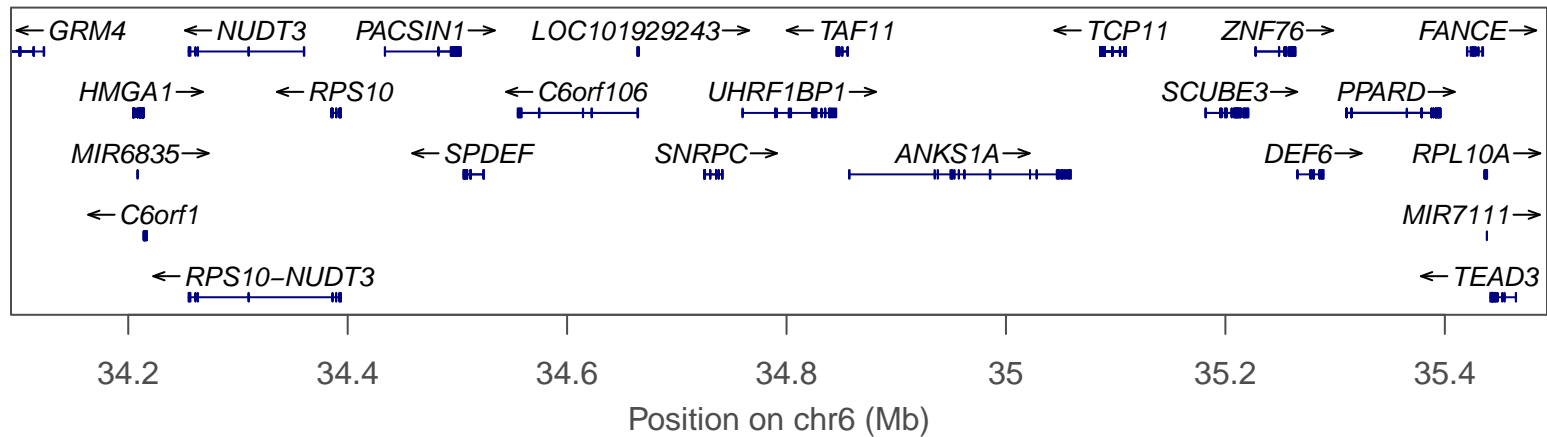

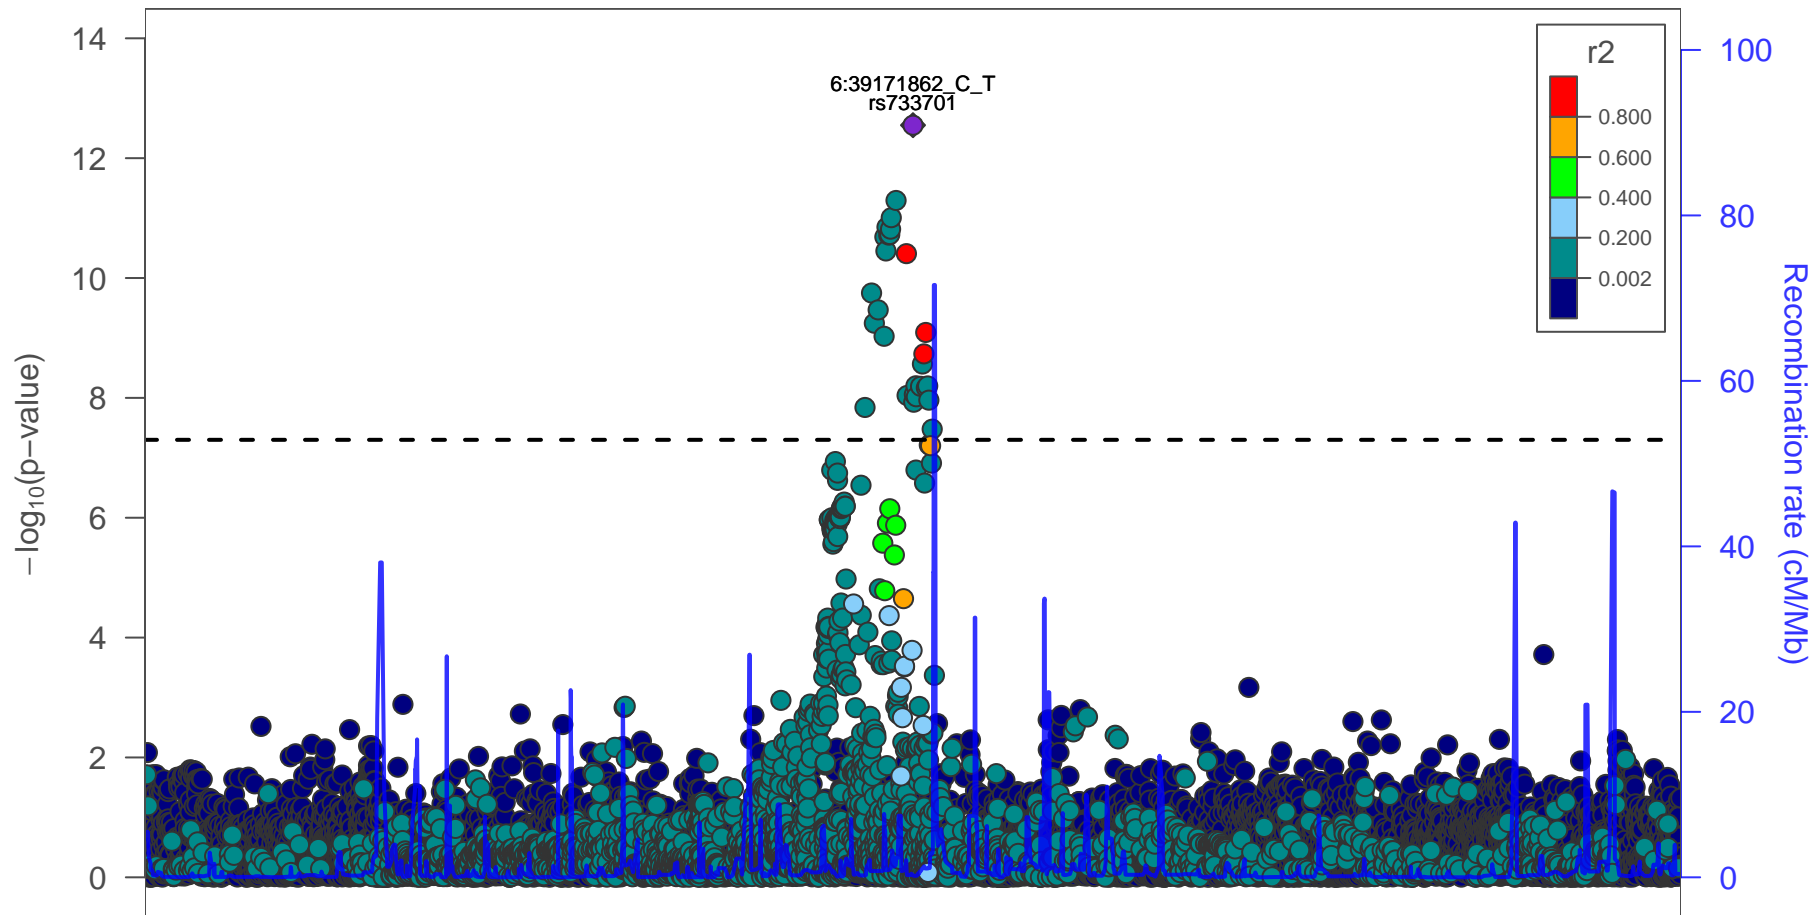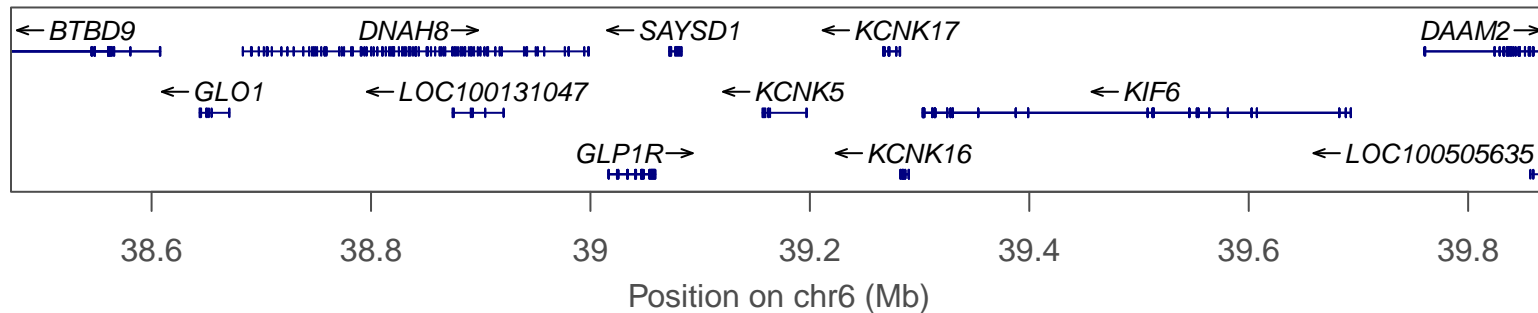

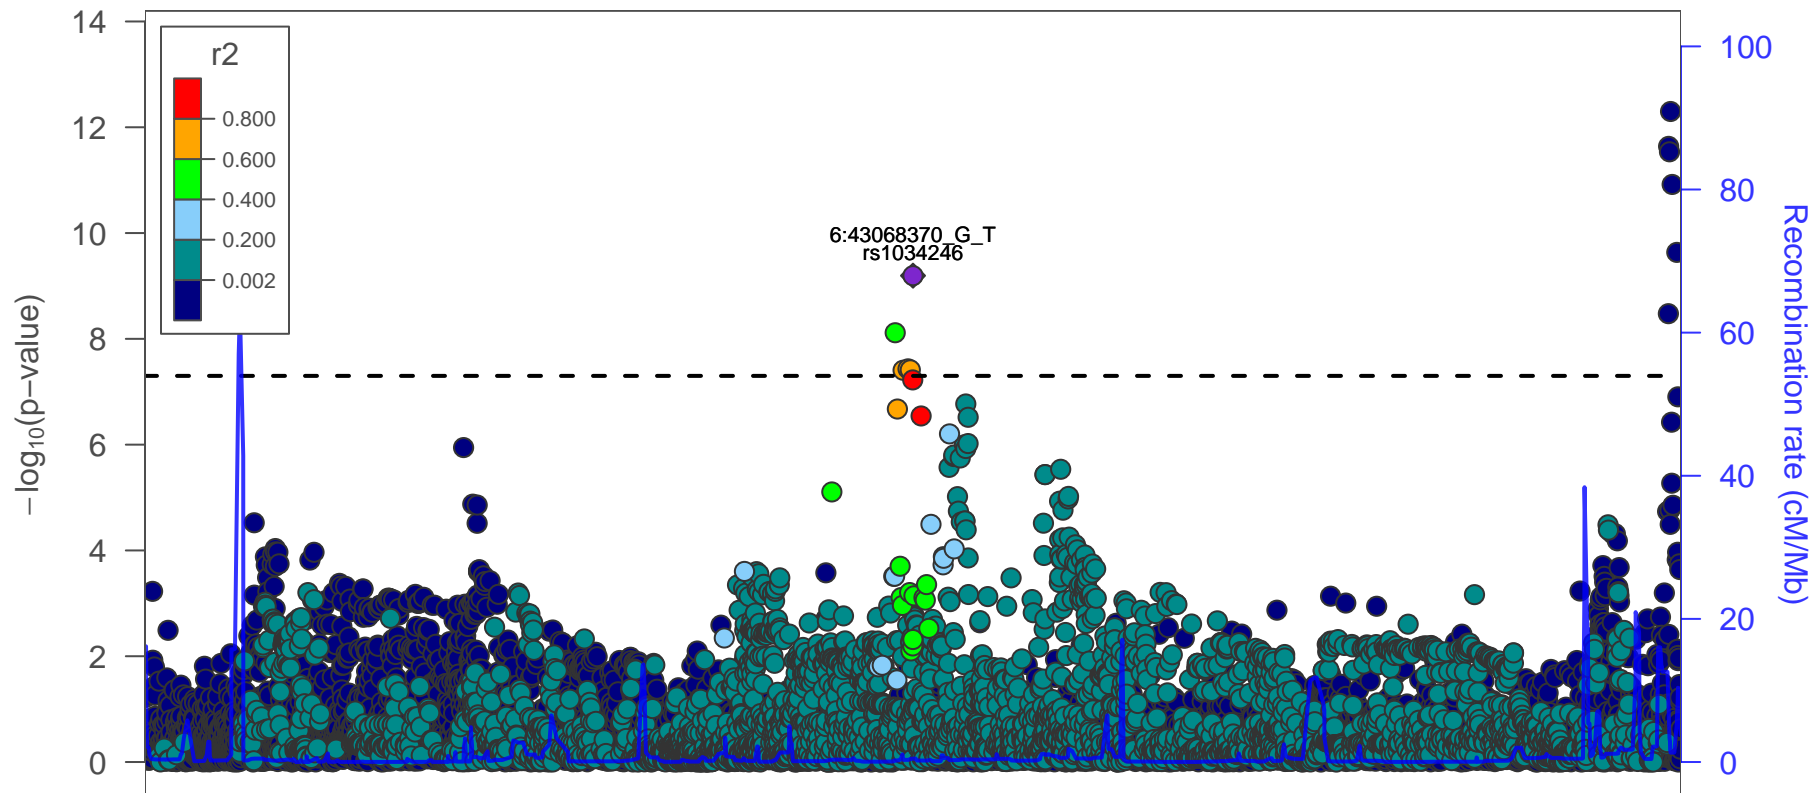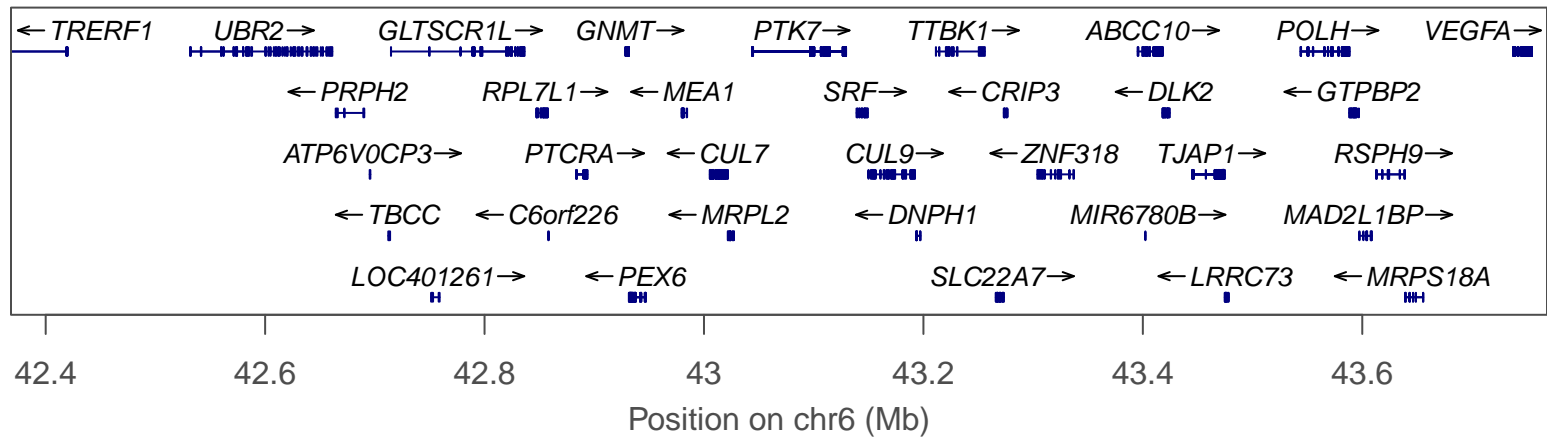

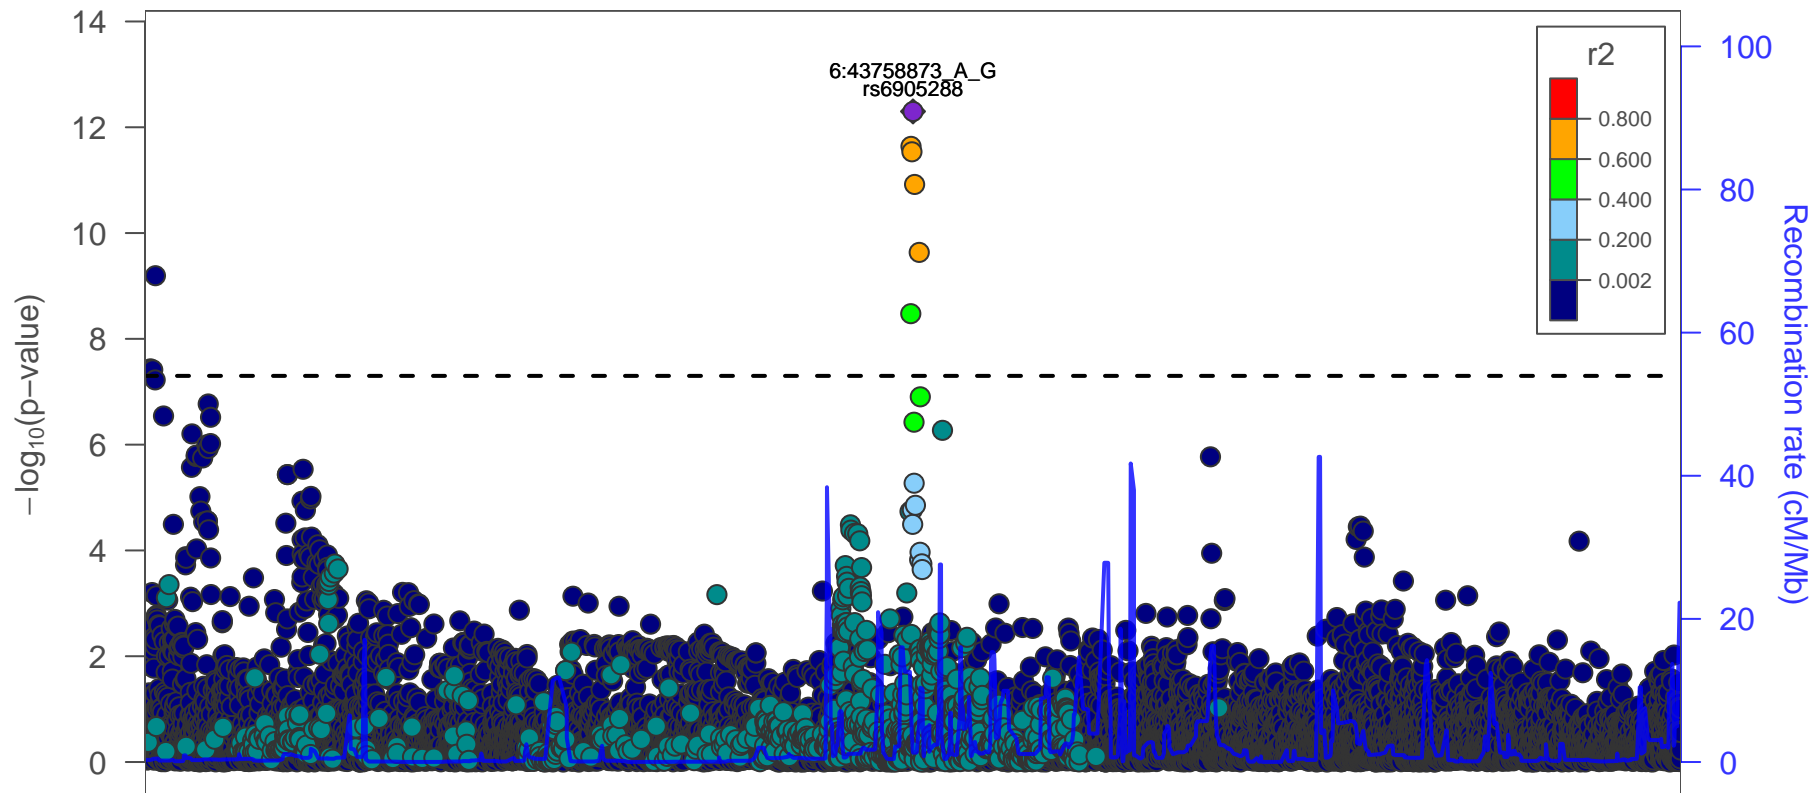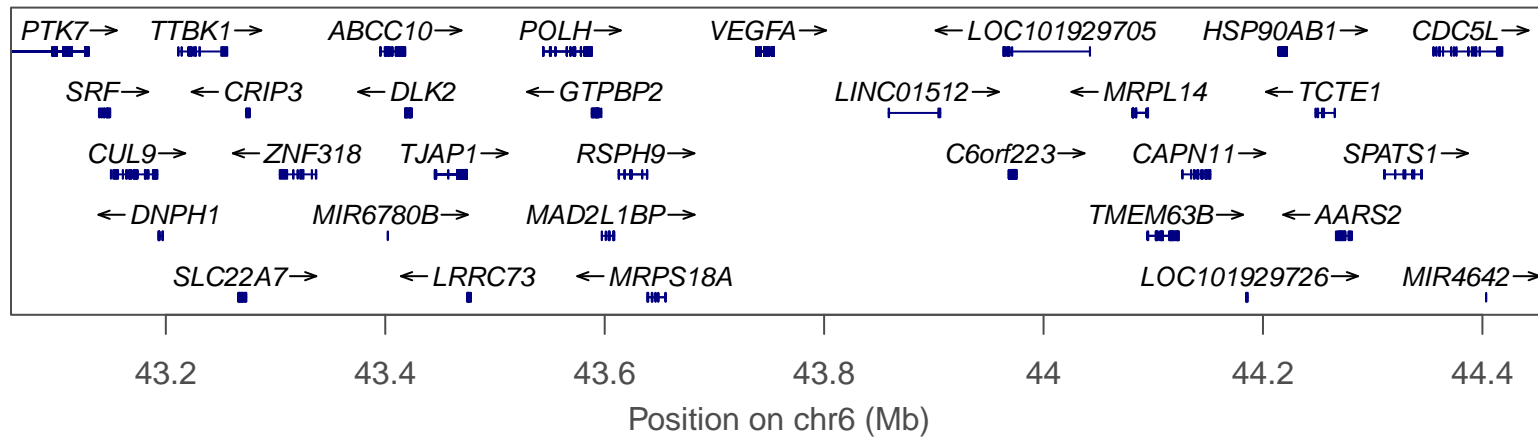



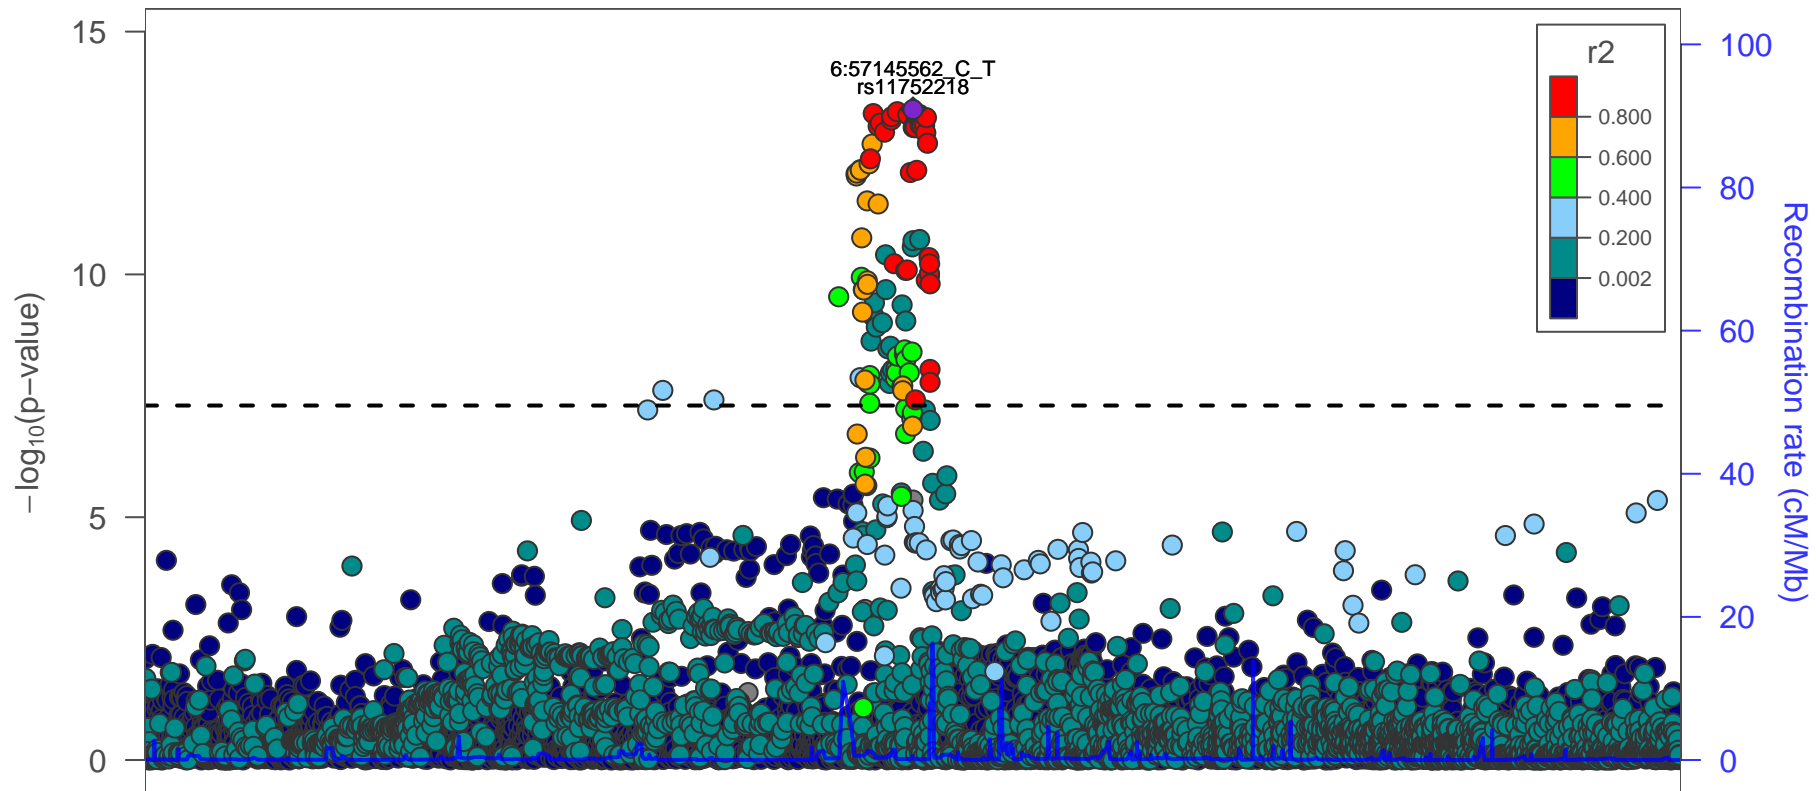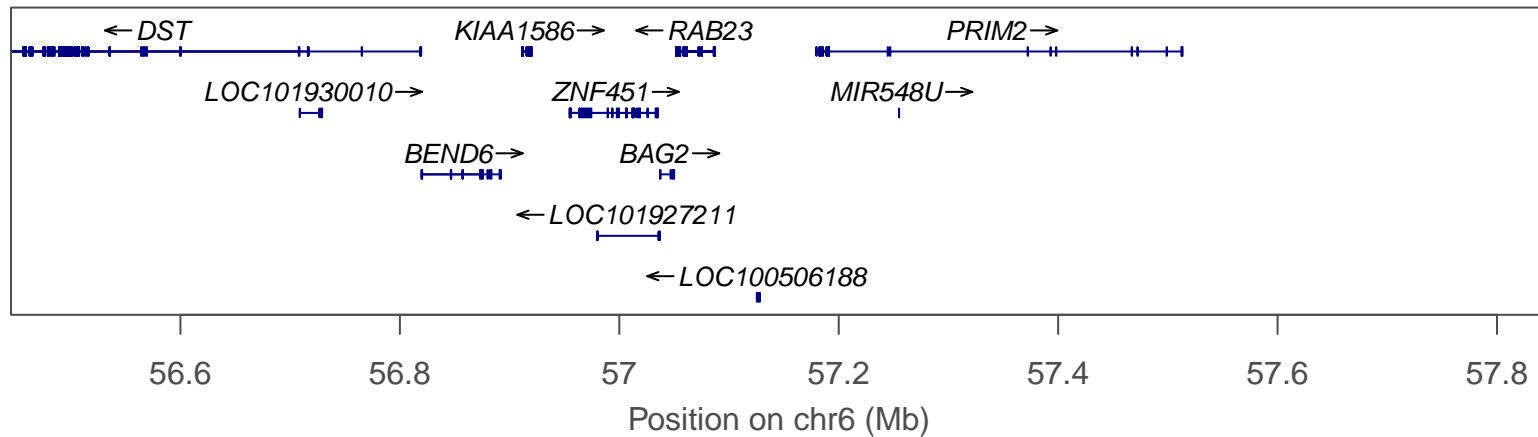

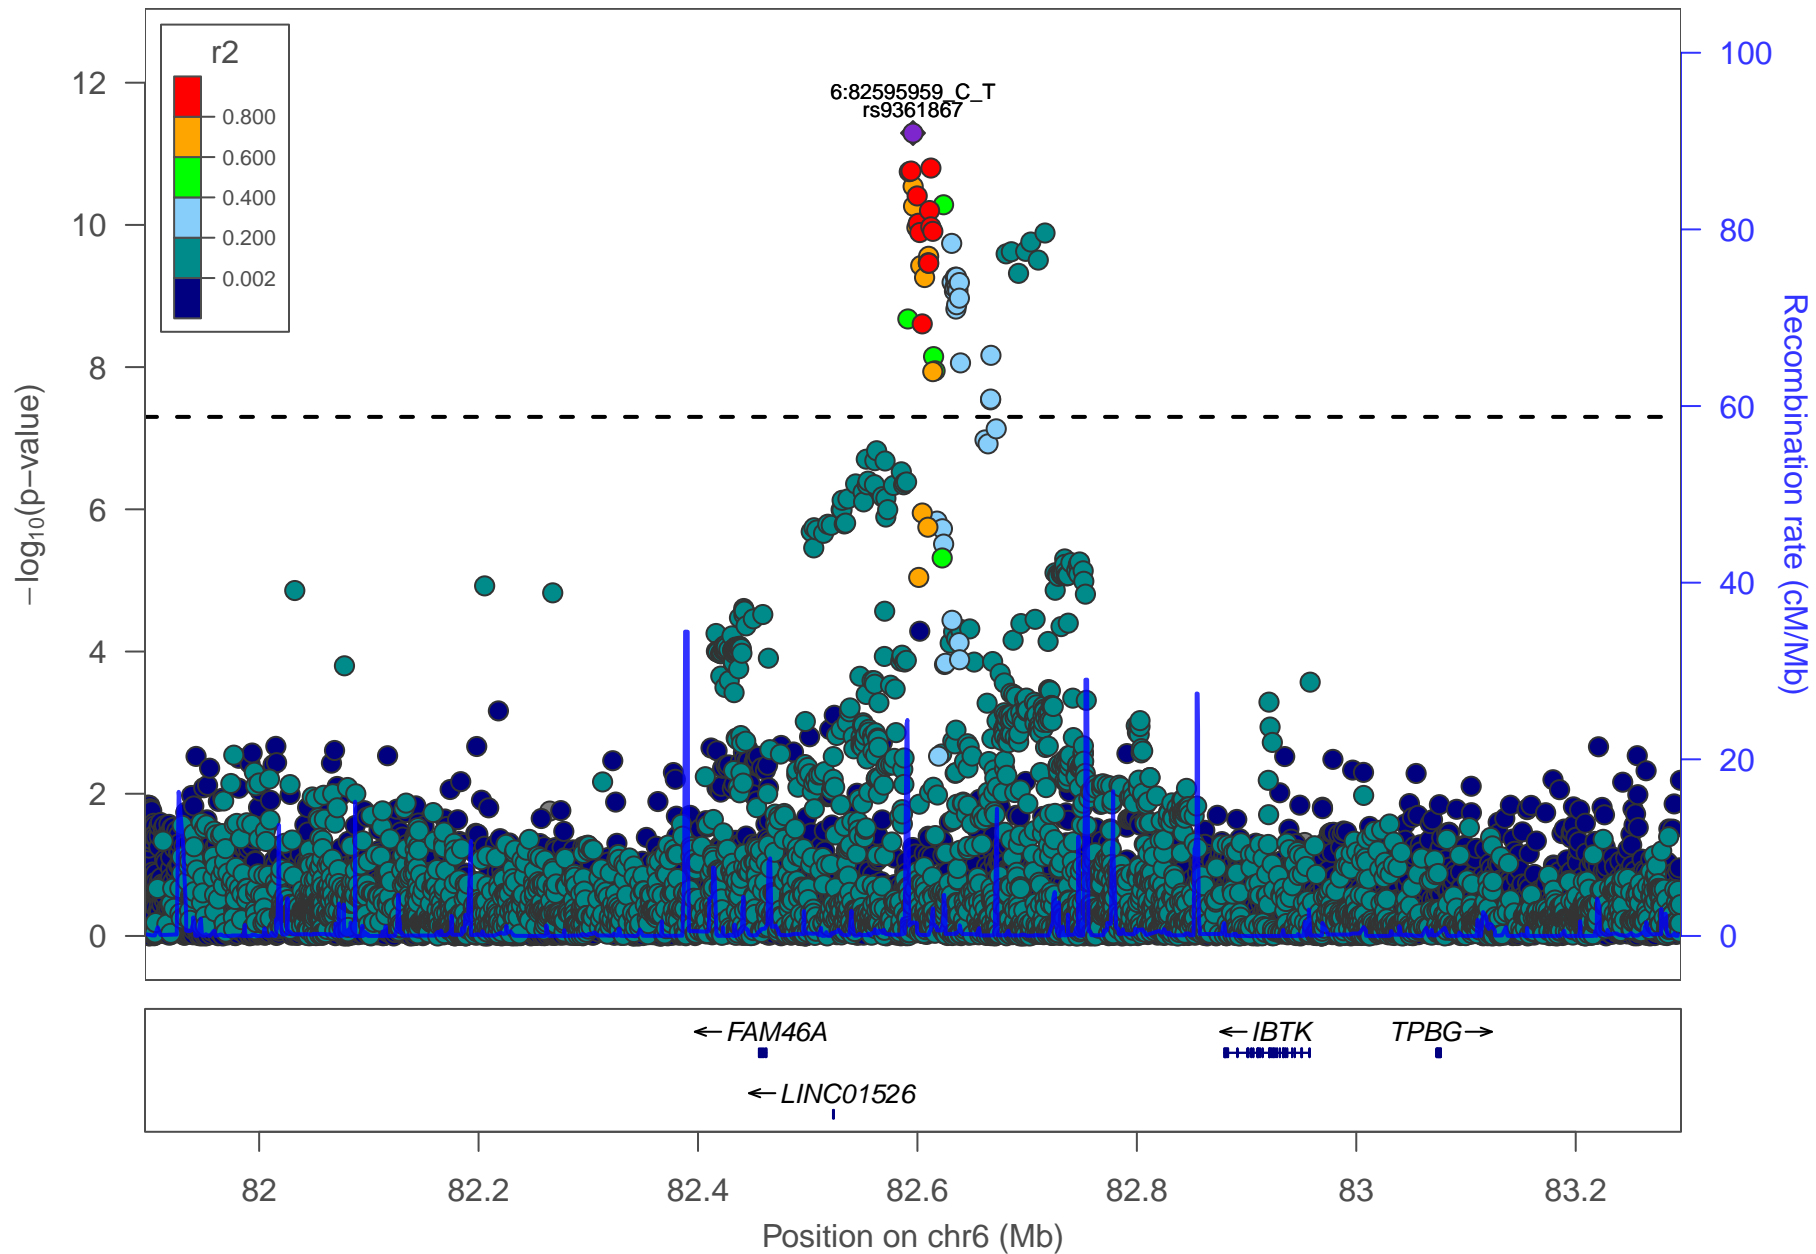

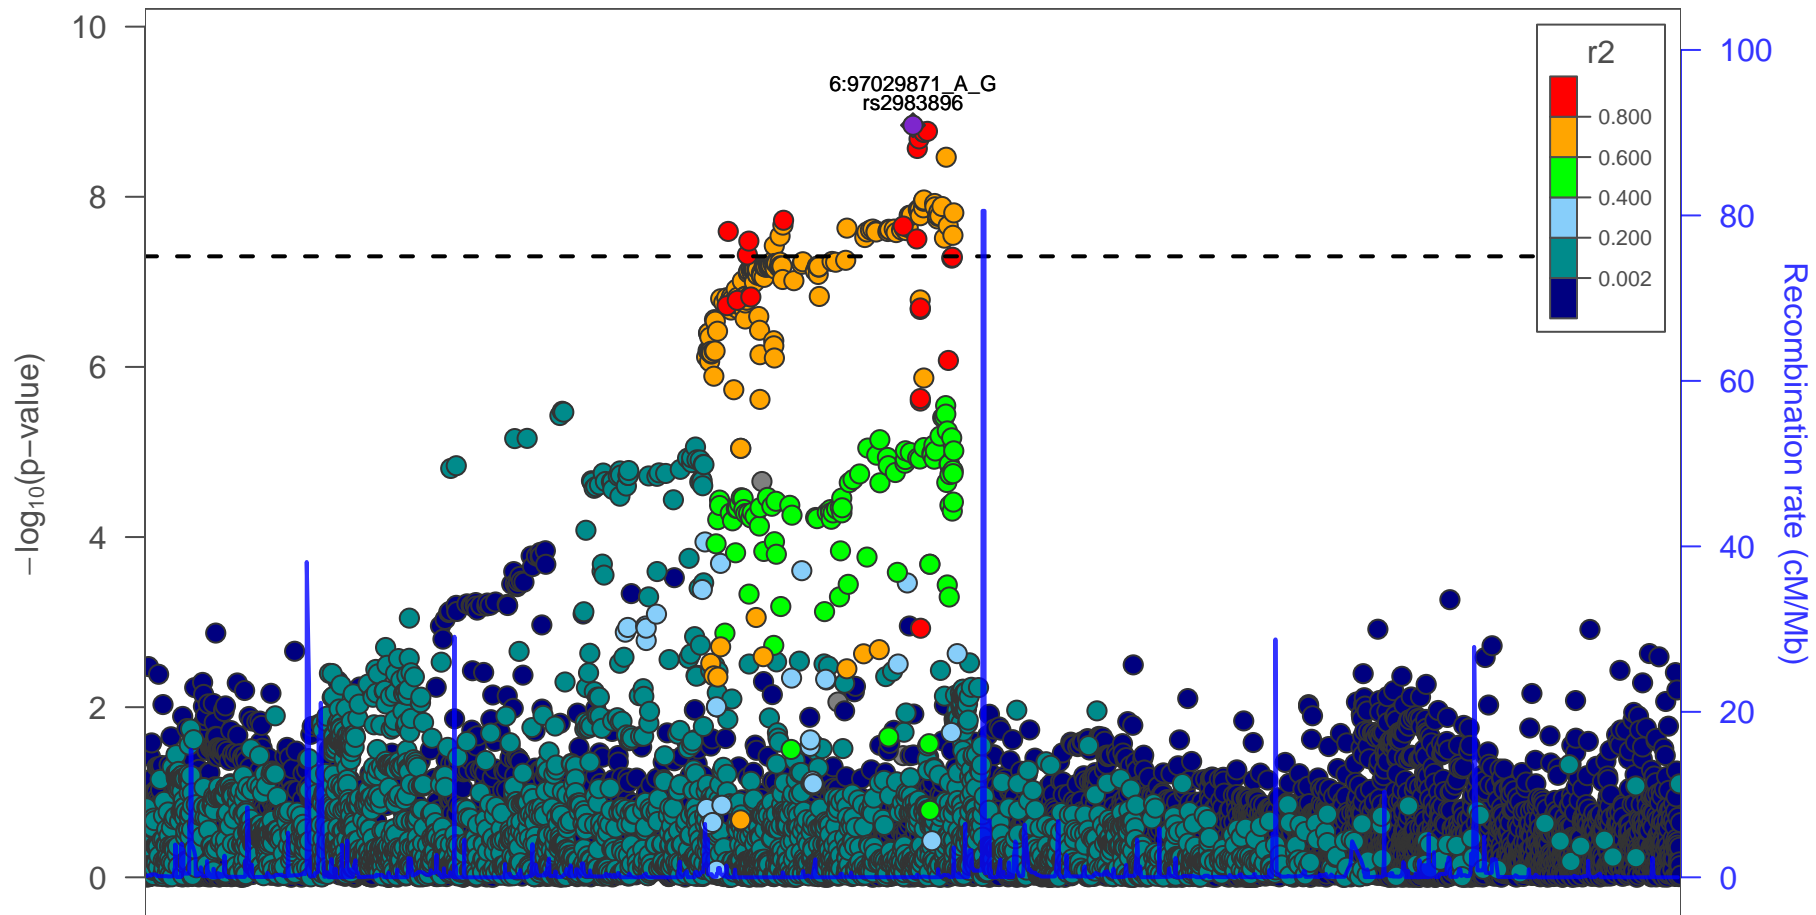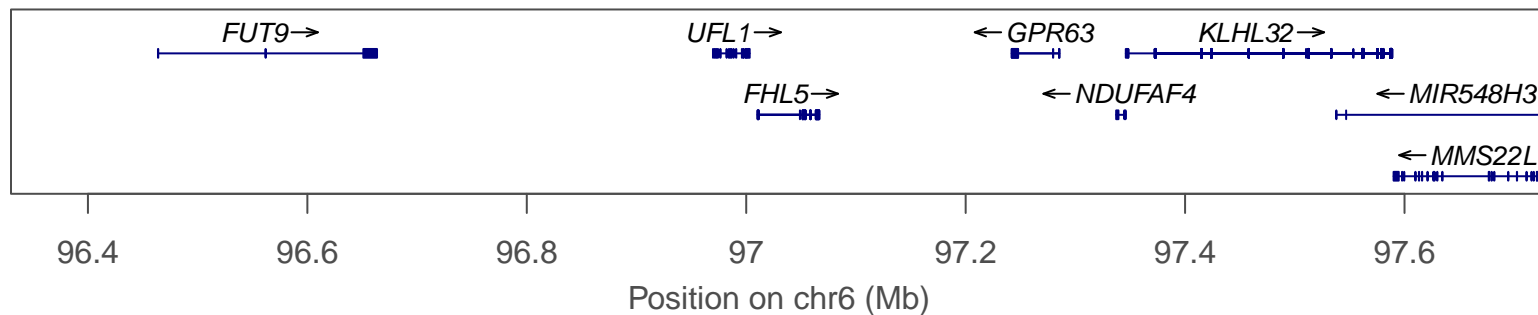

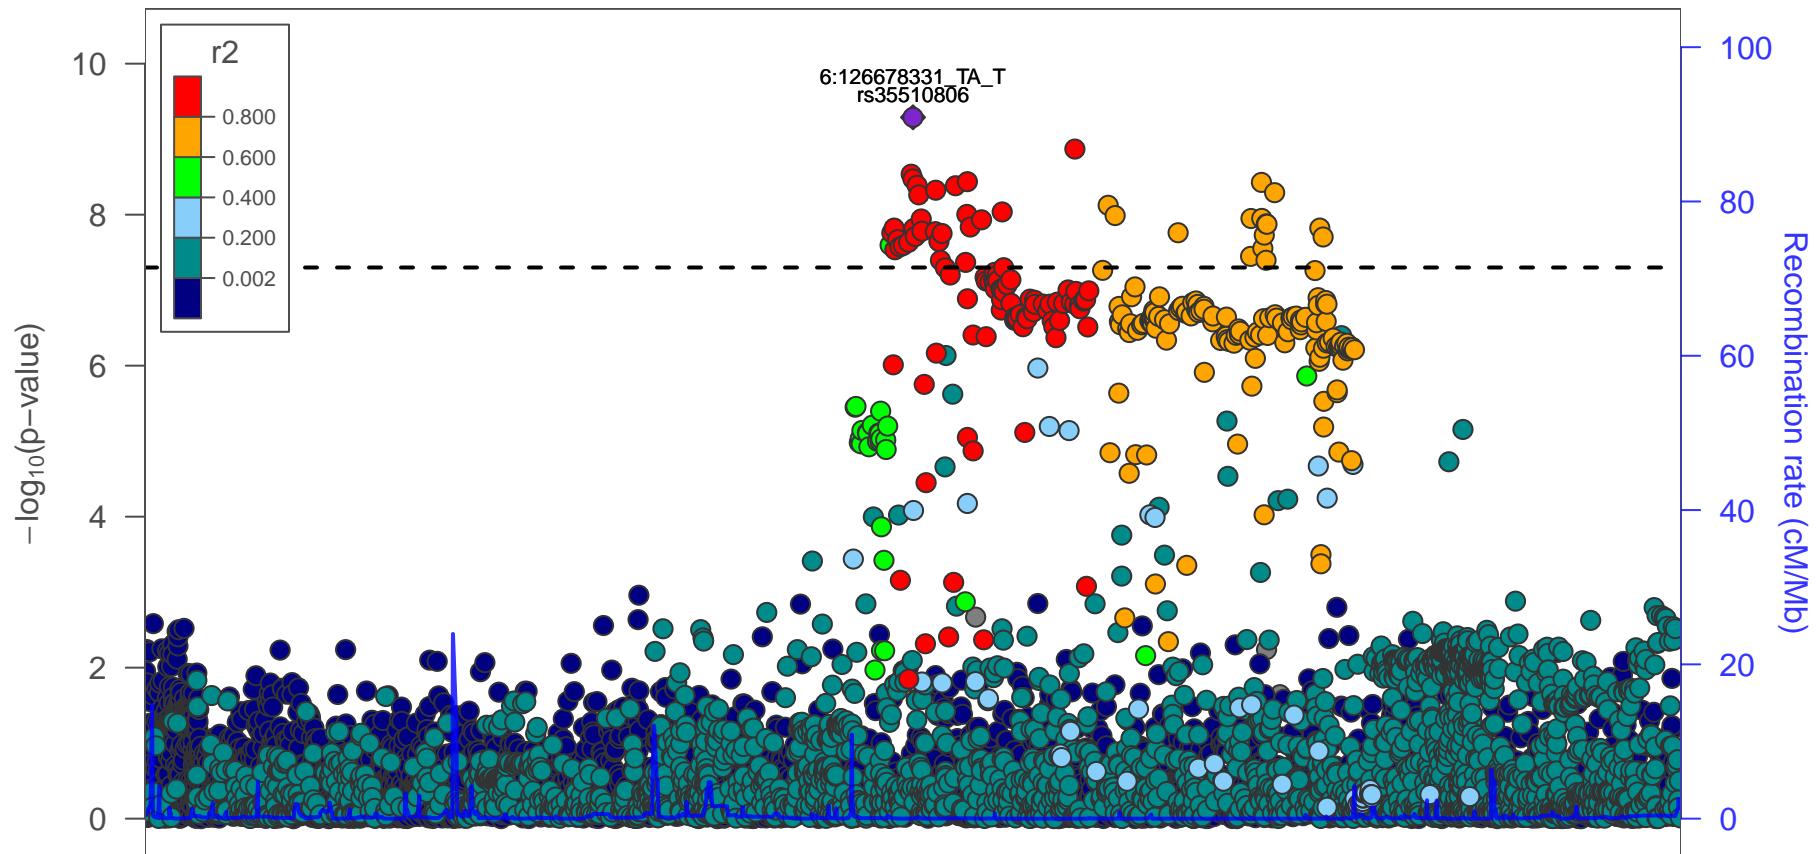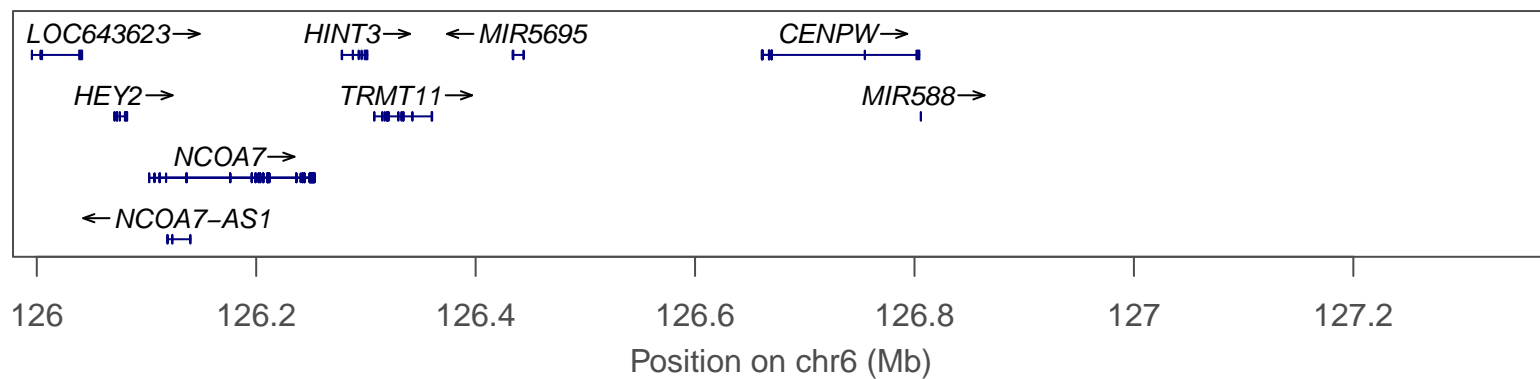

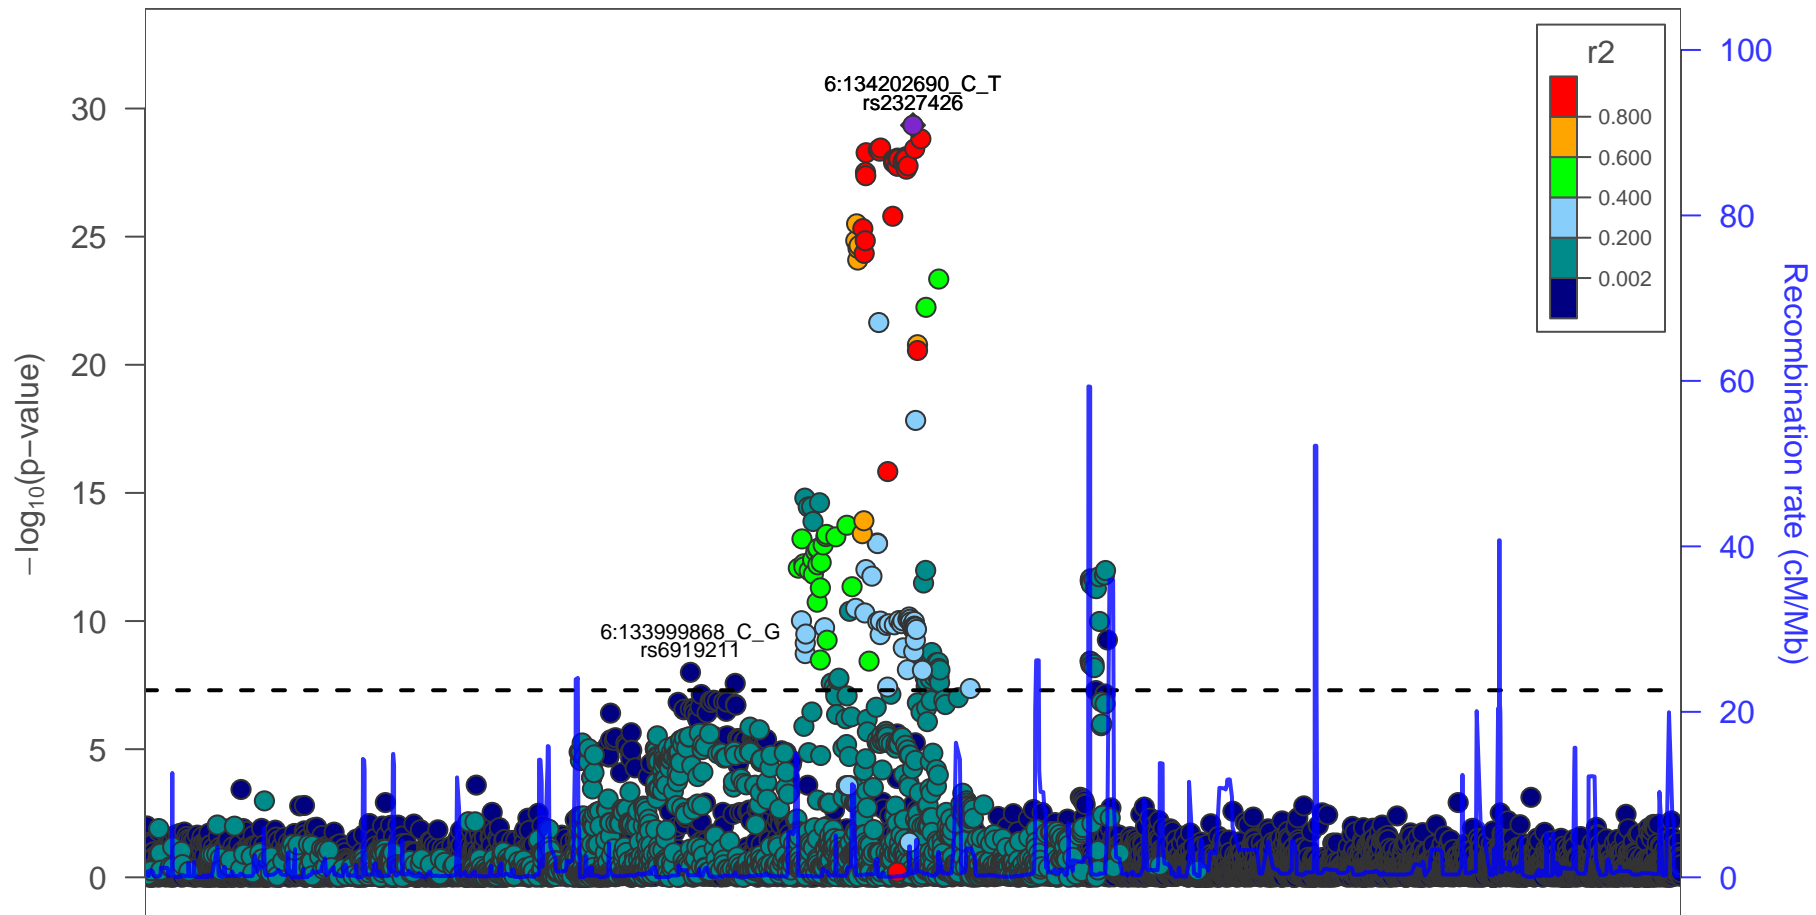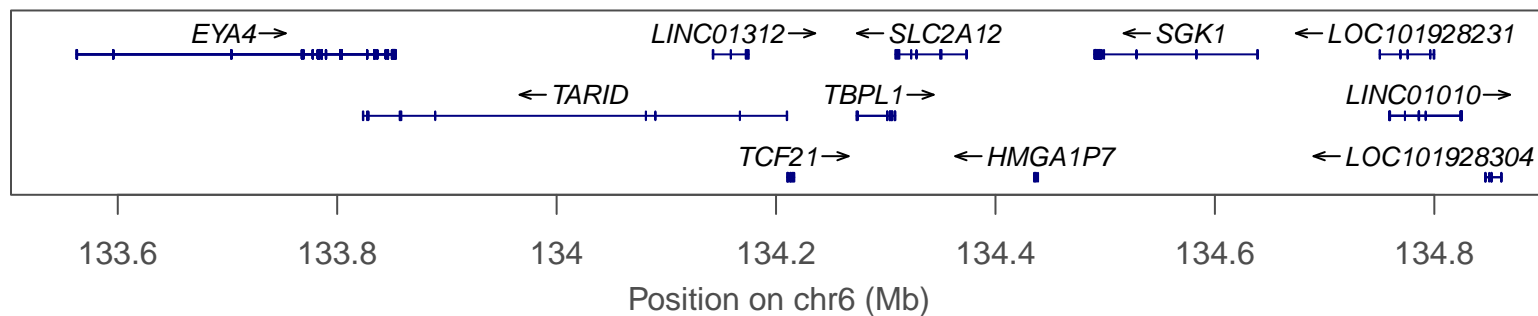

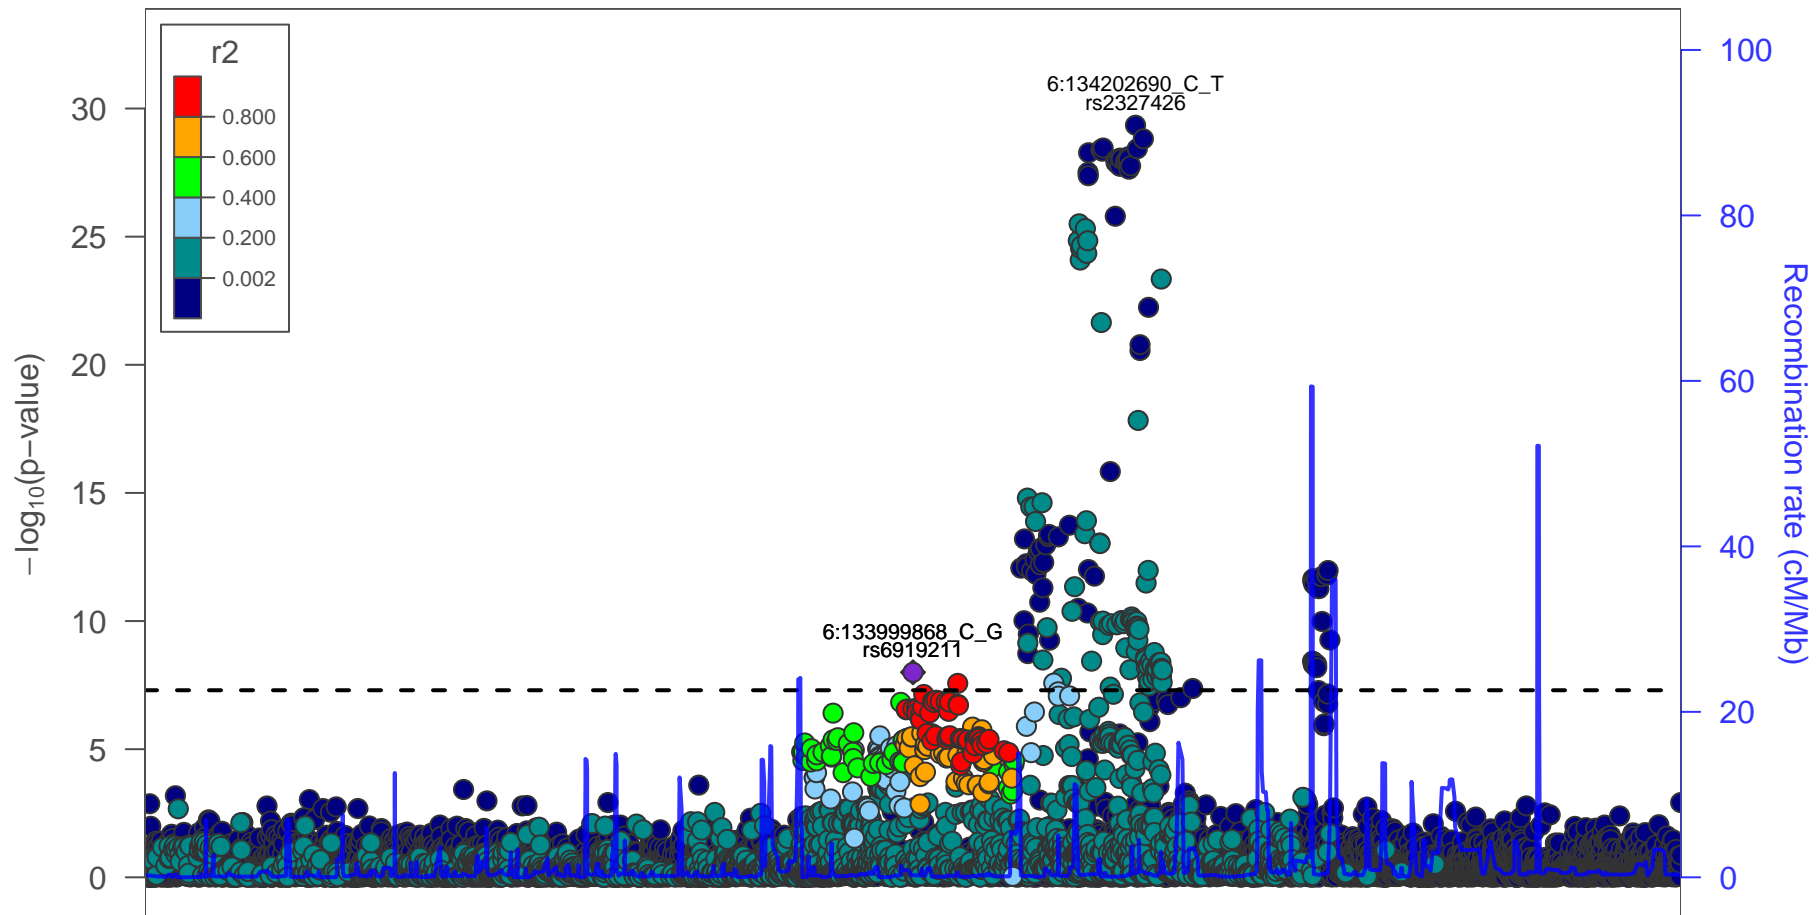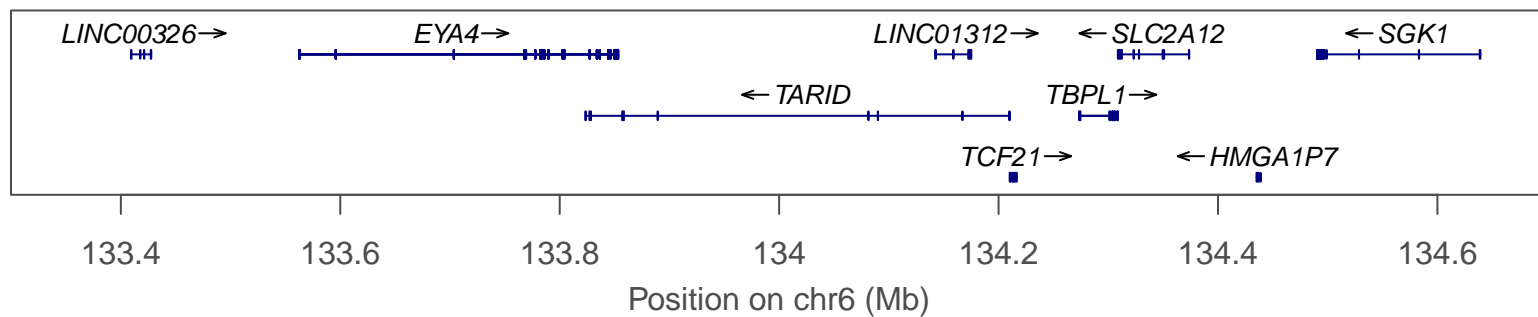

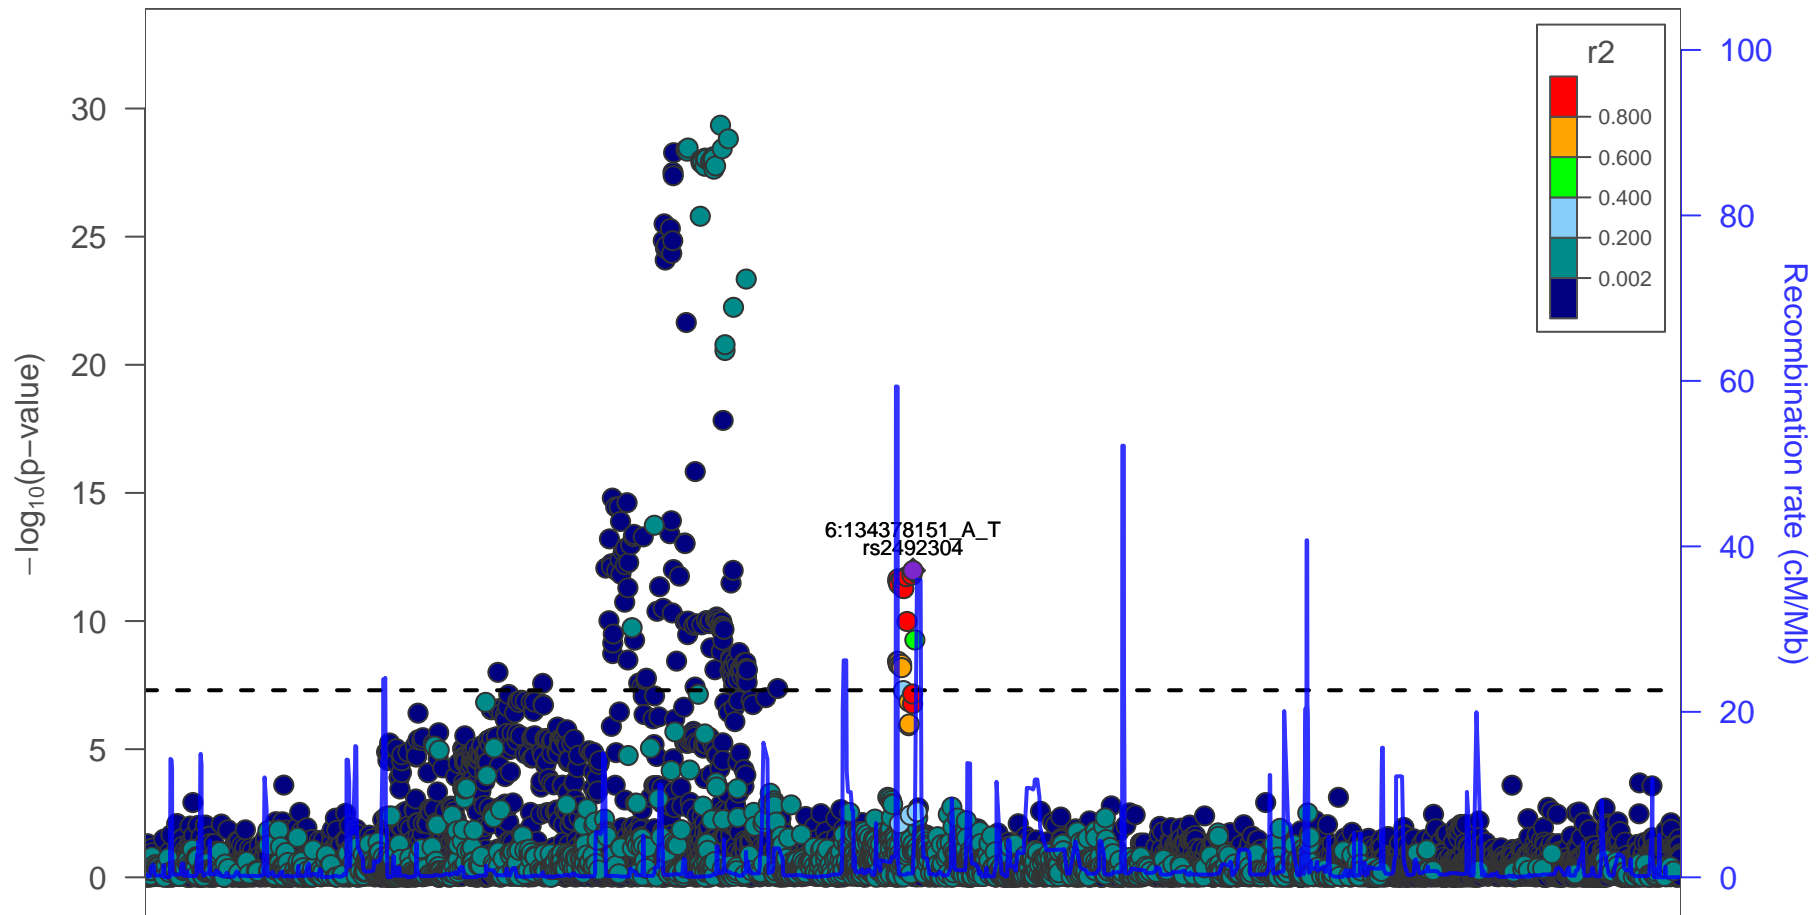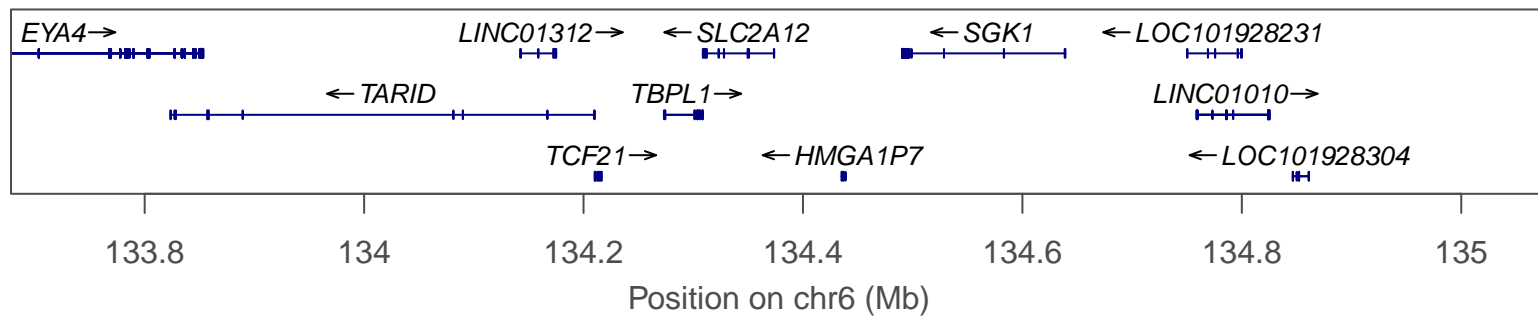

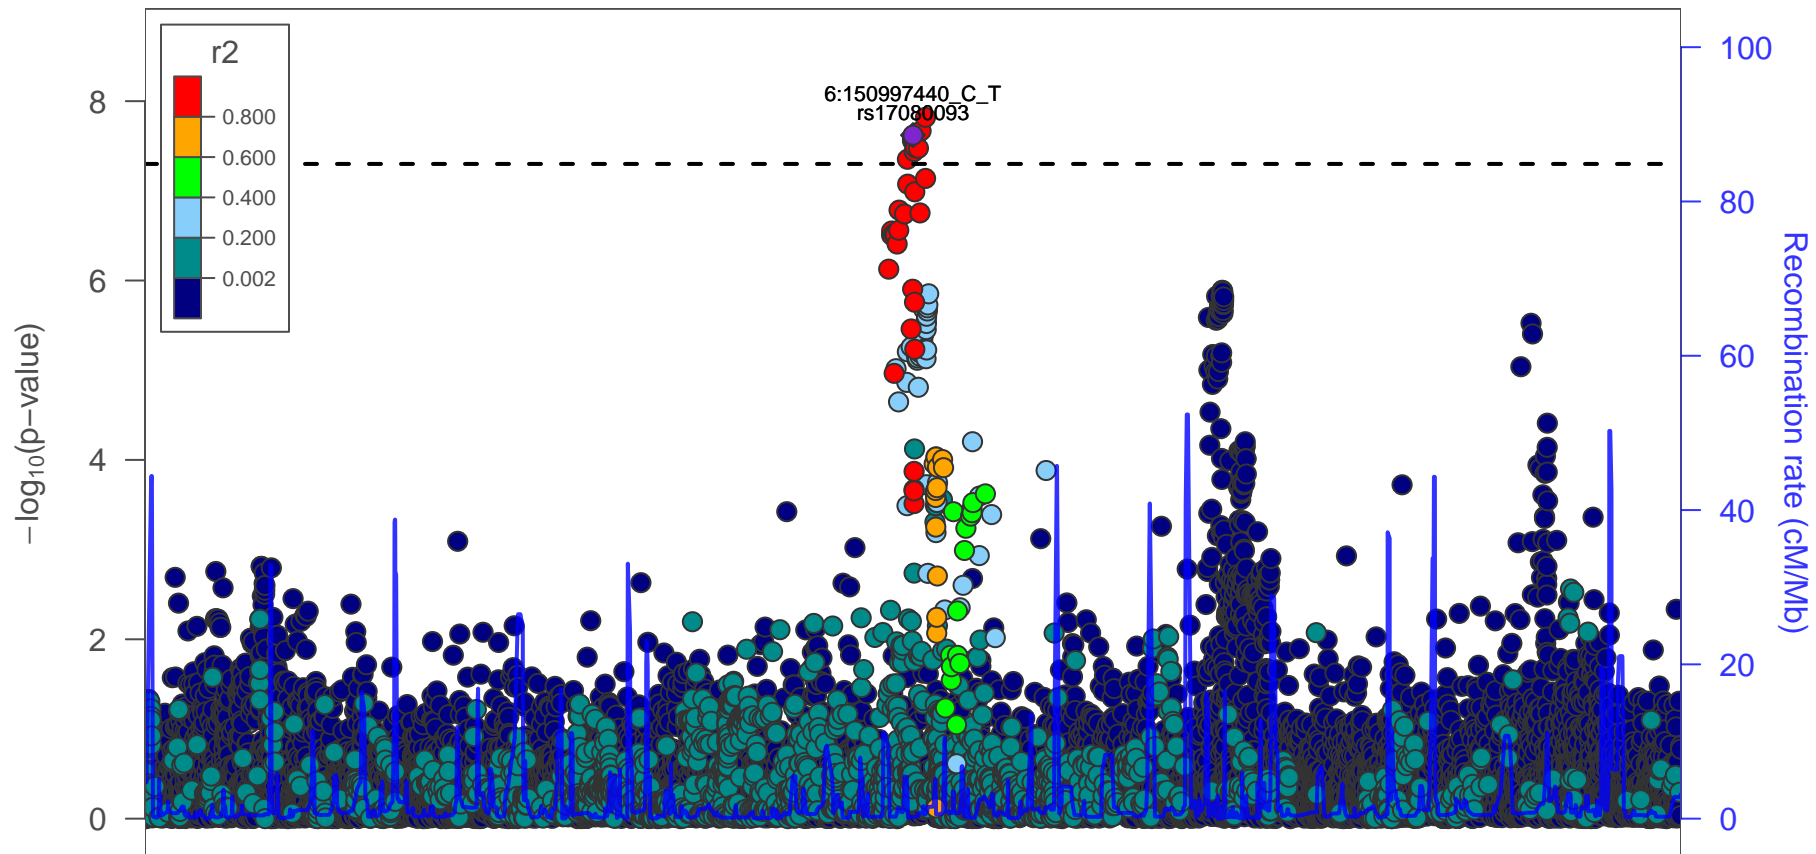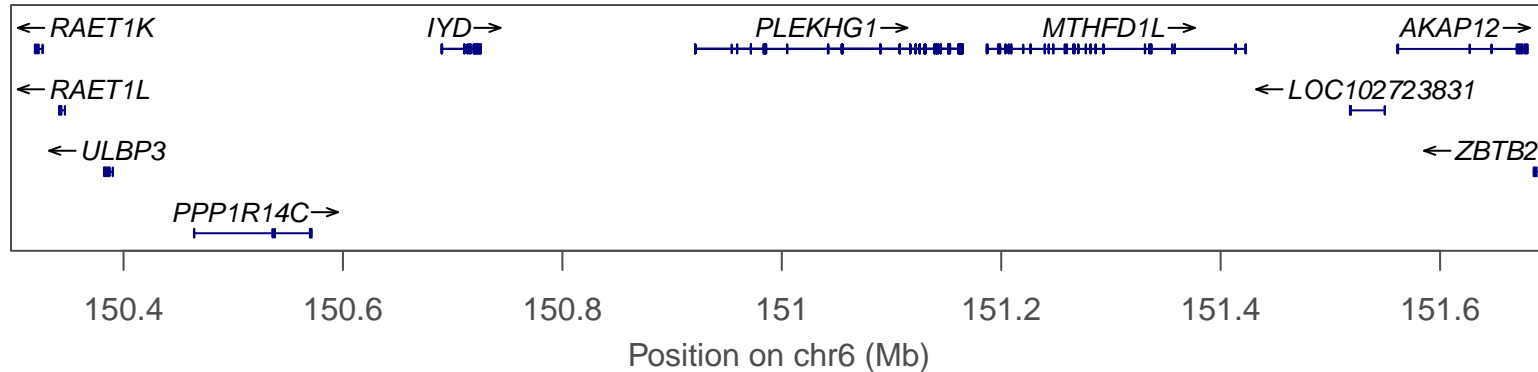



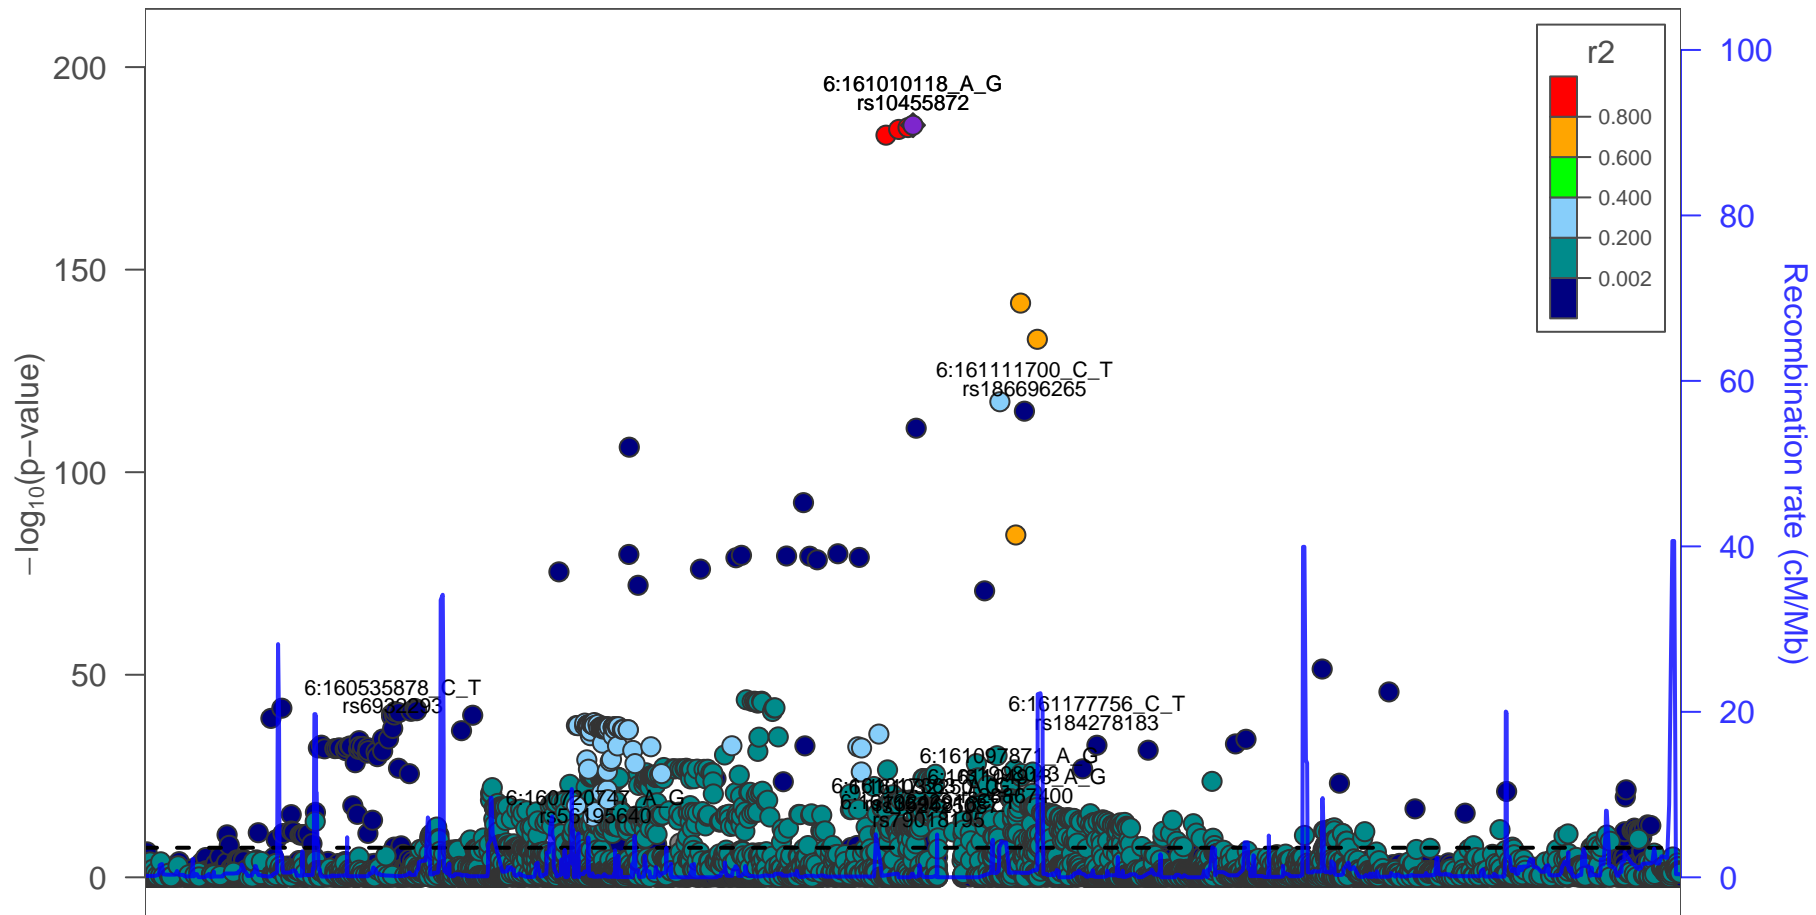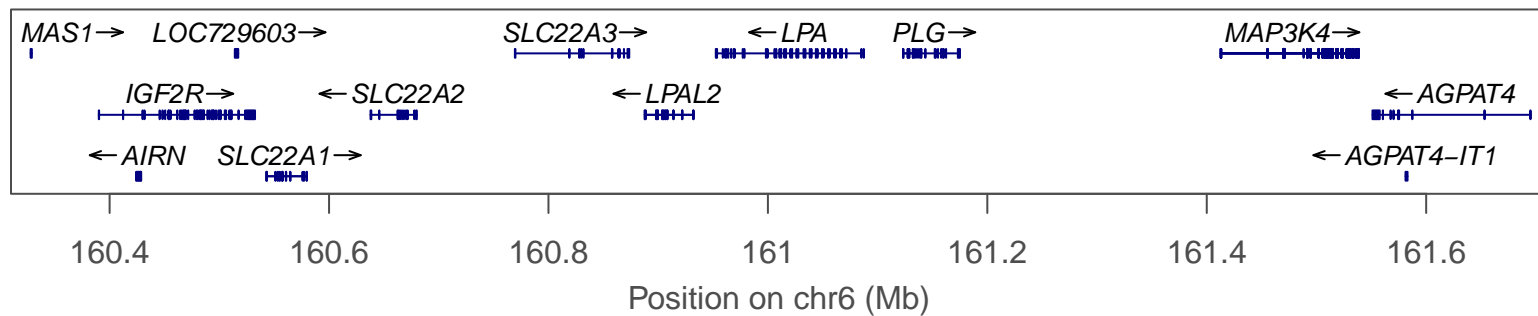

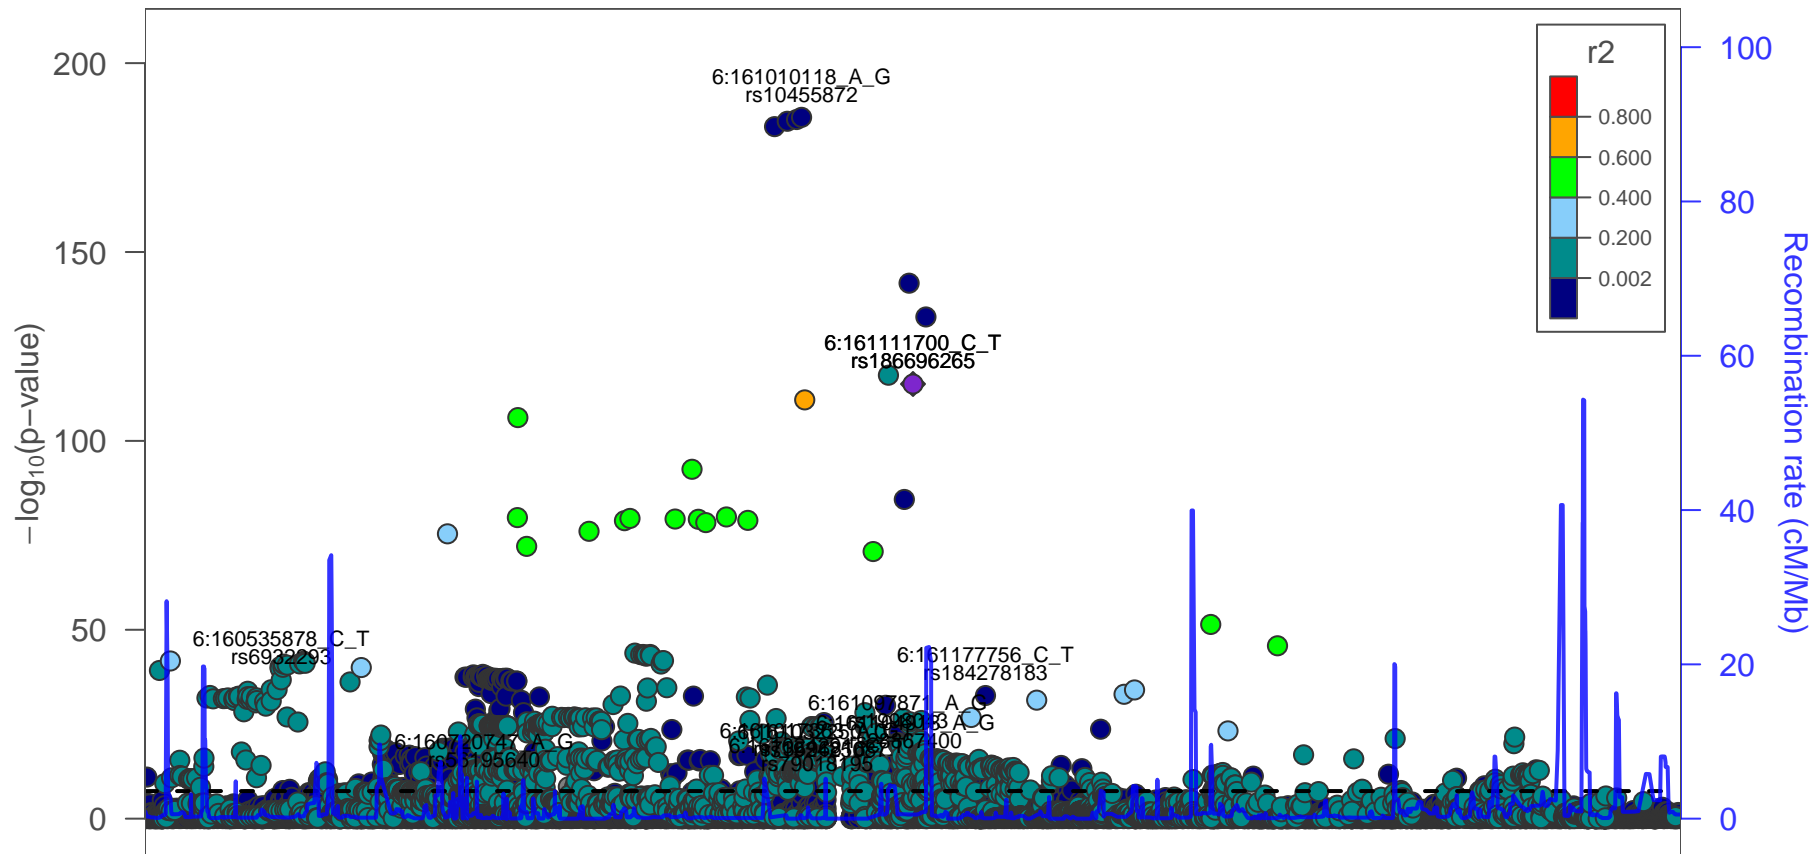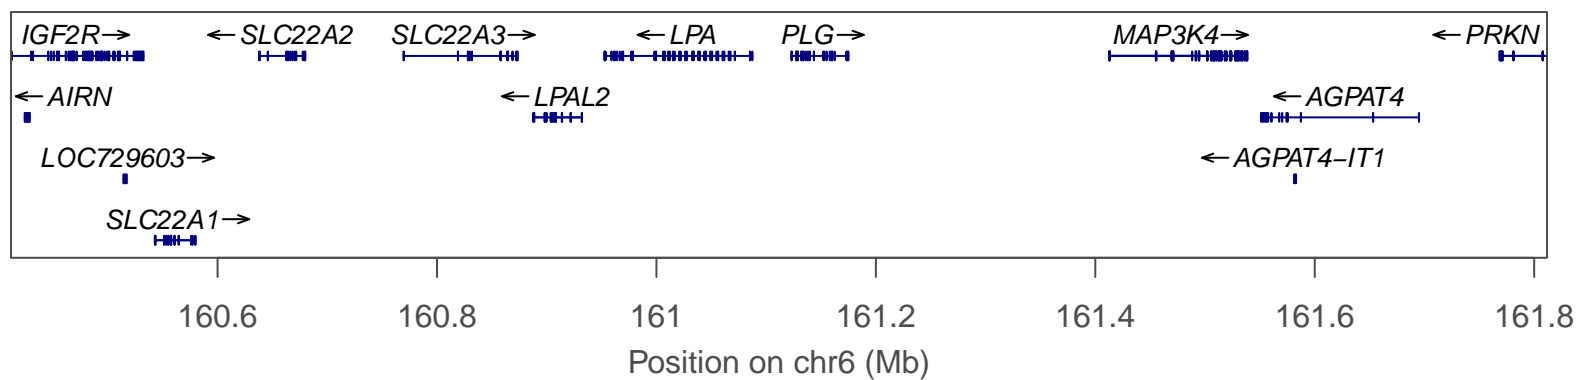

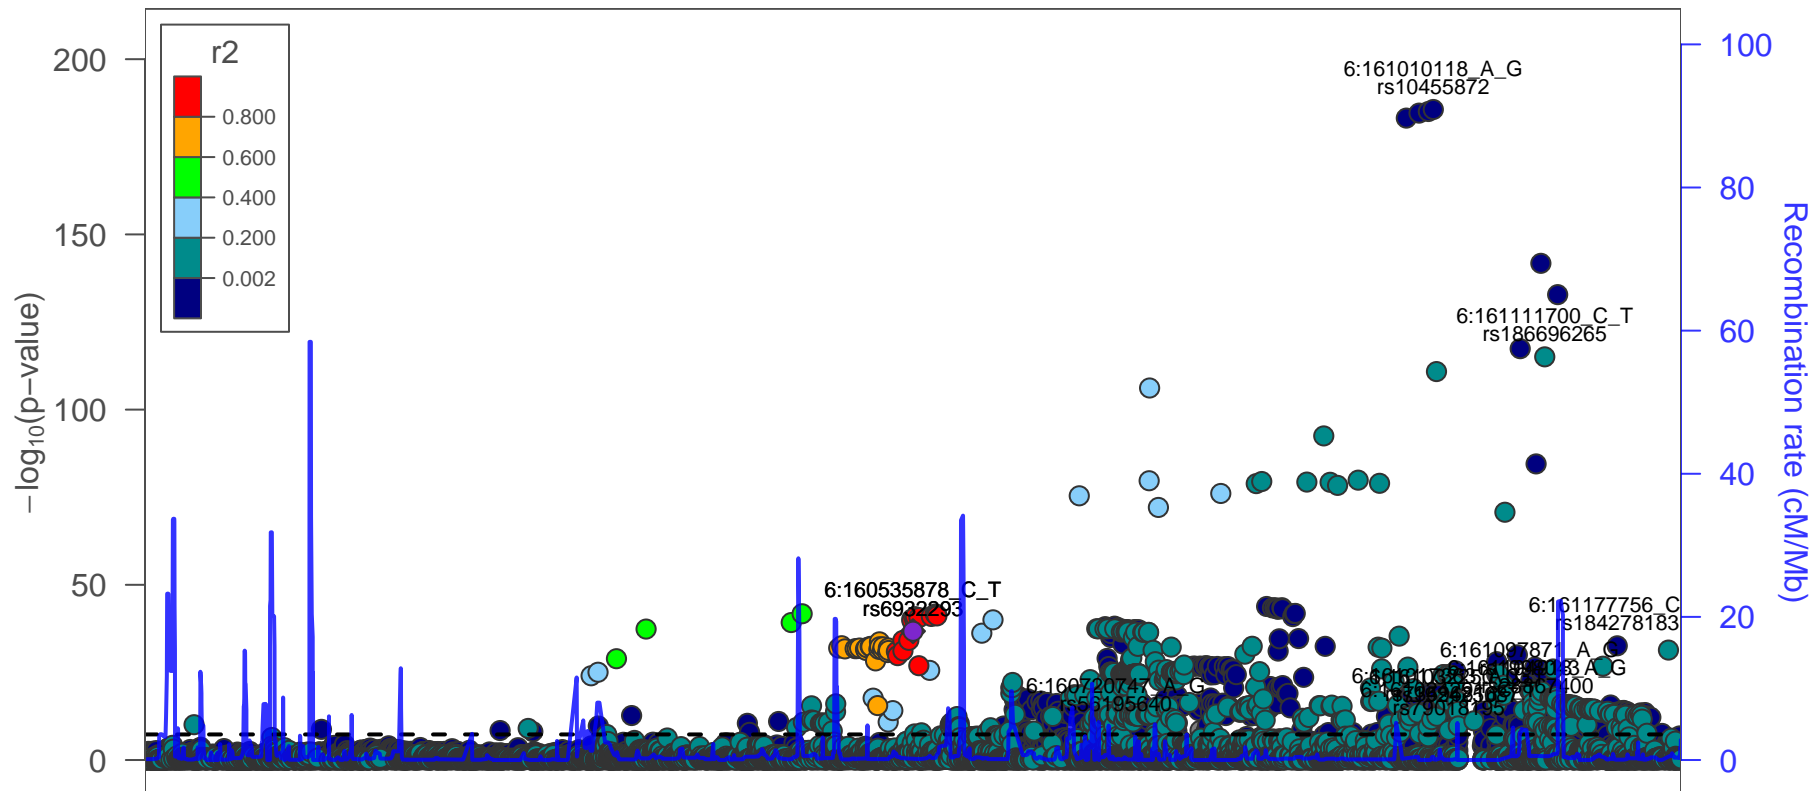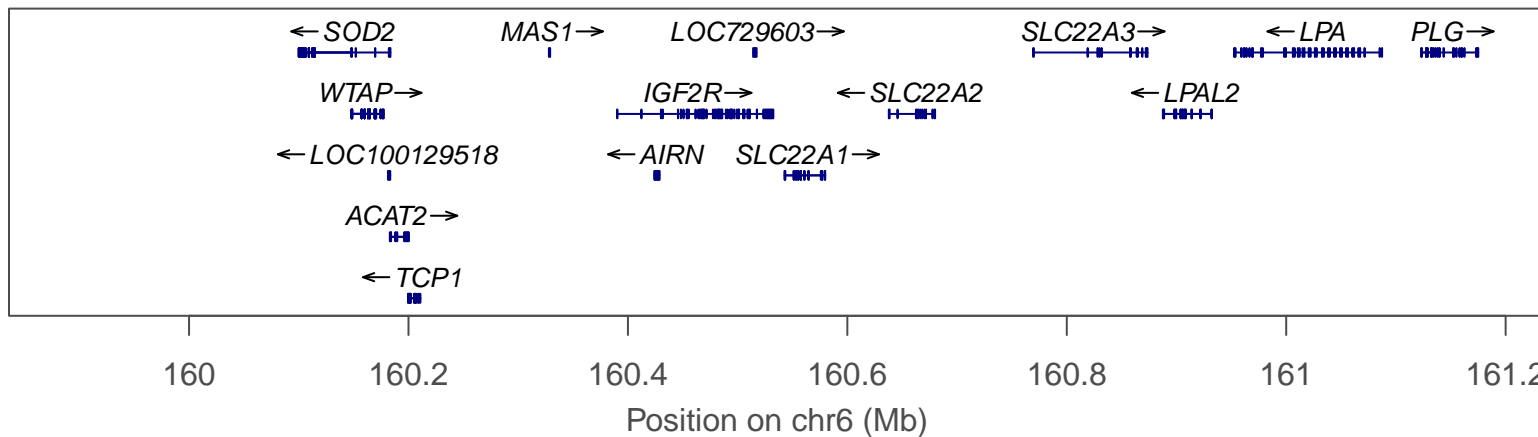

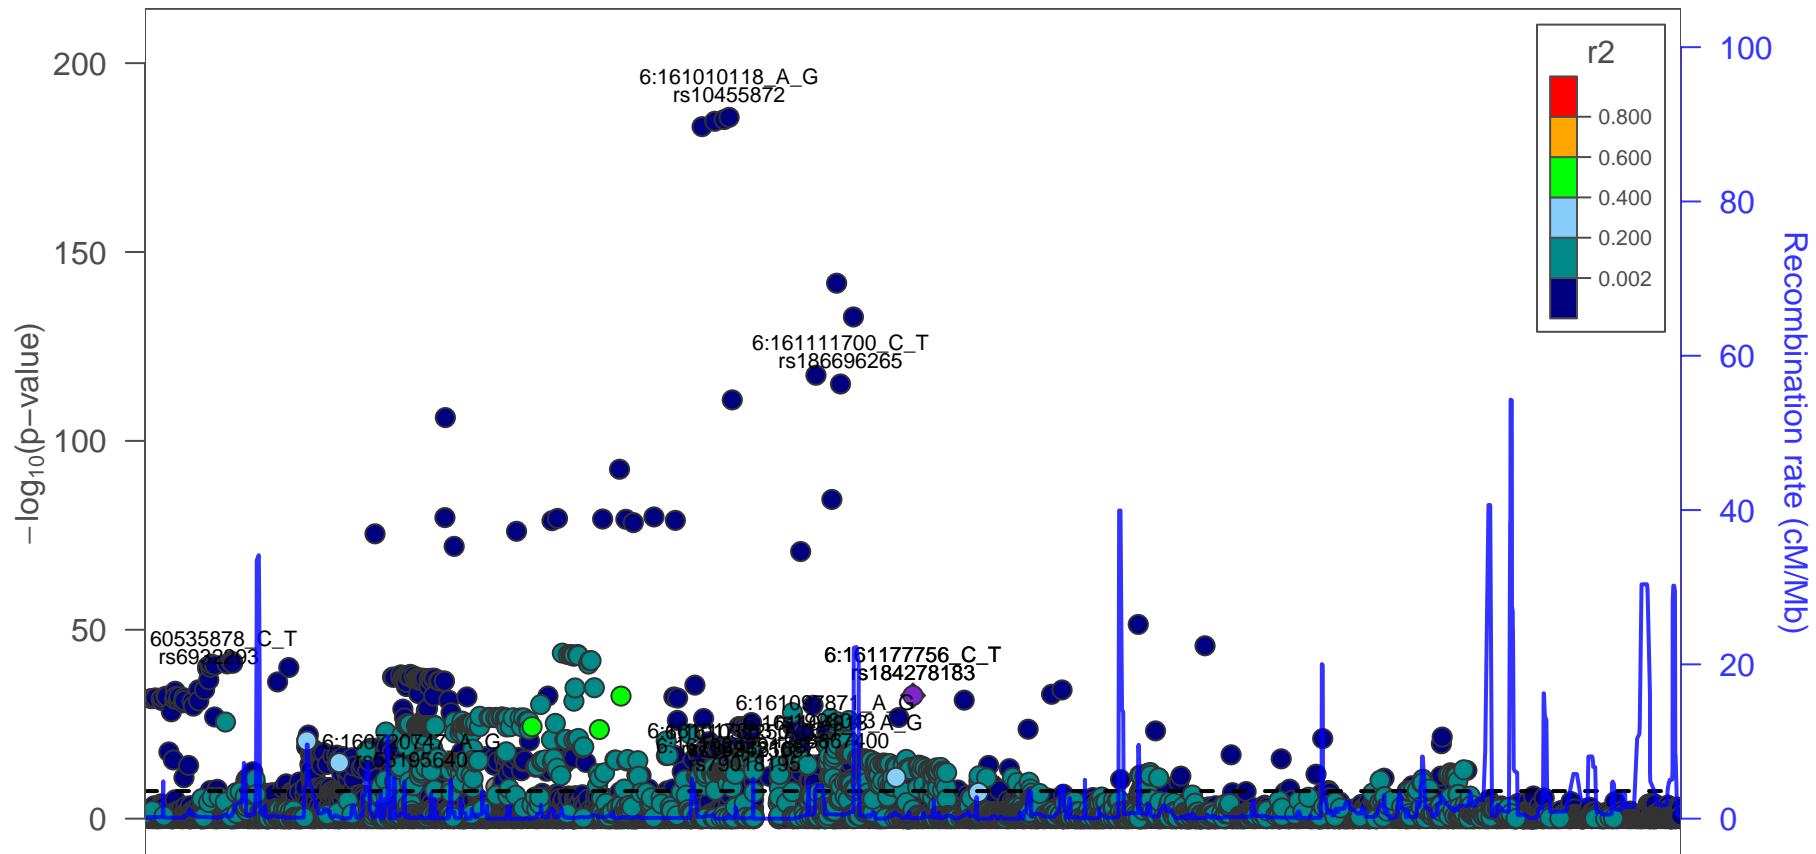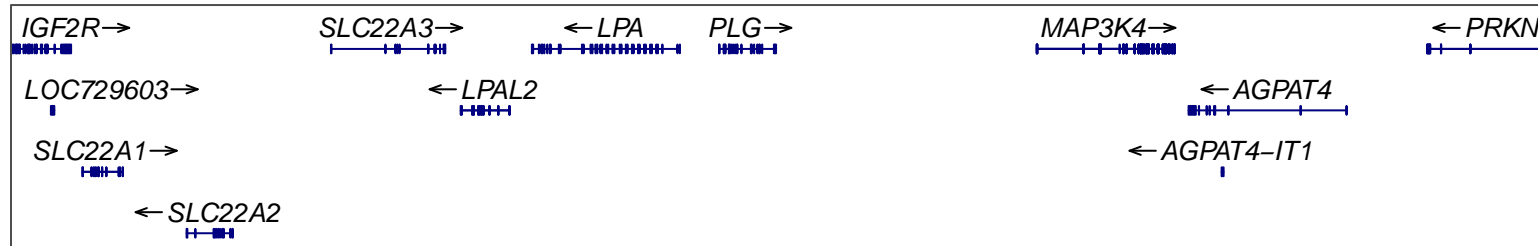

Position on chr6 (Mb)

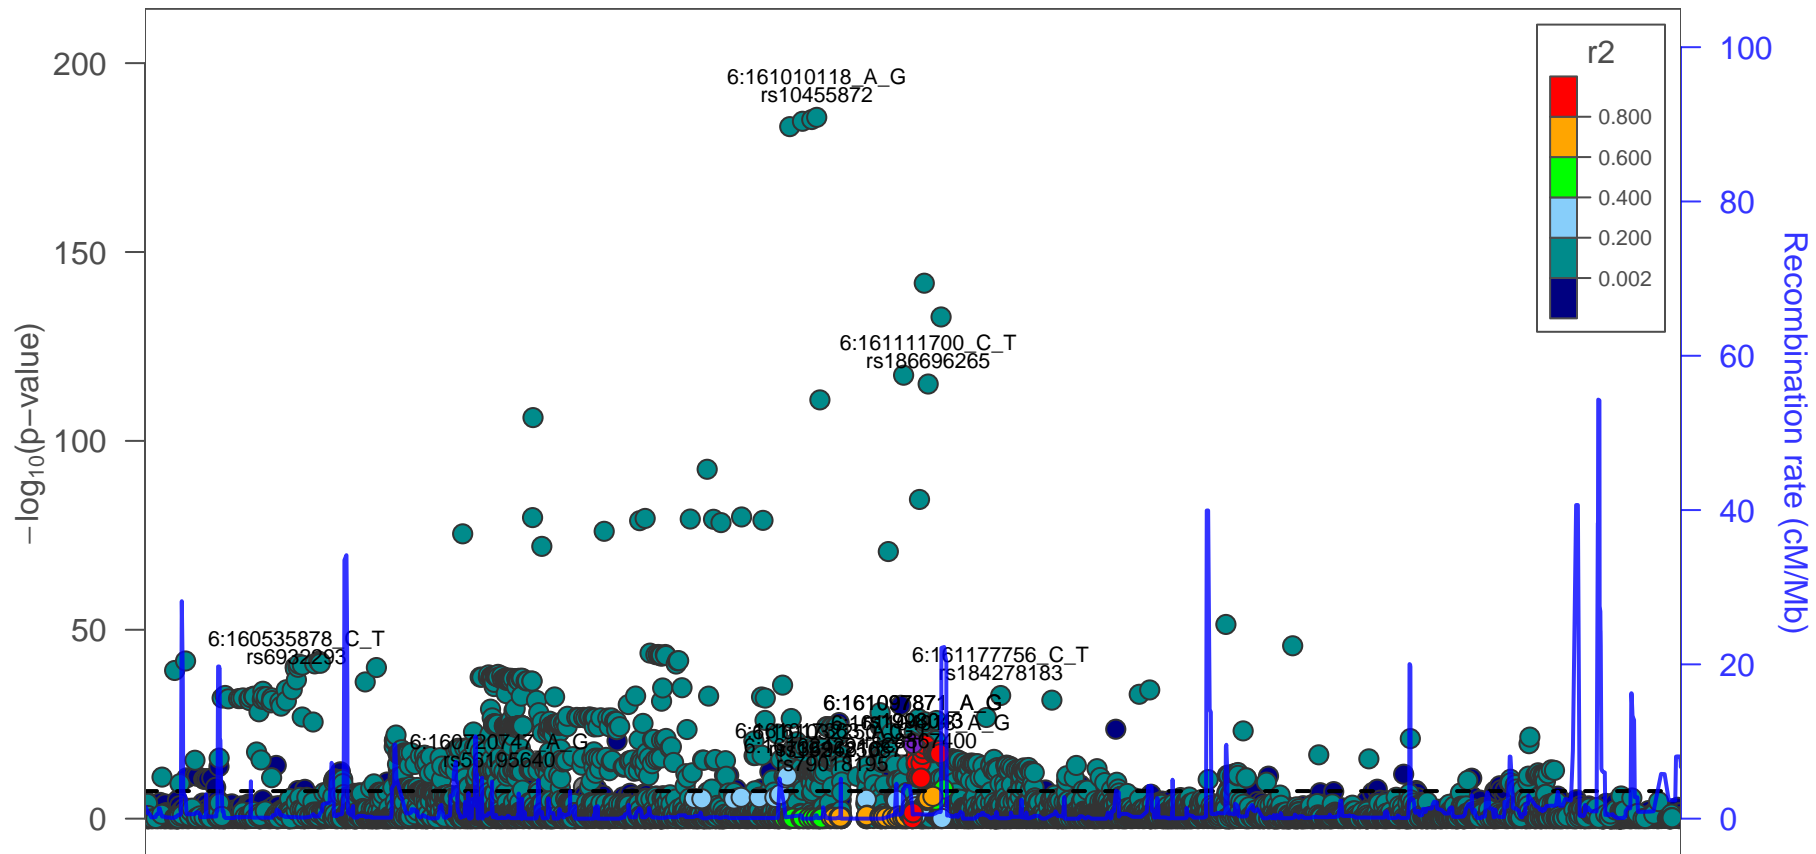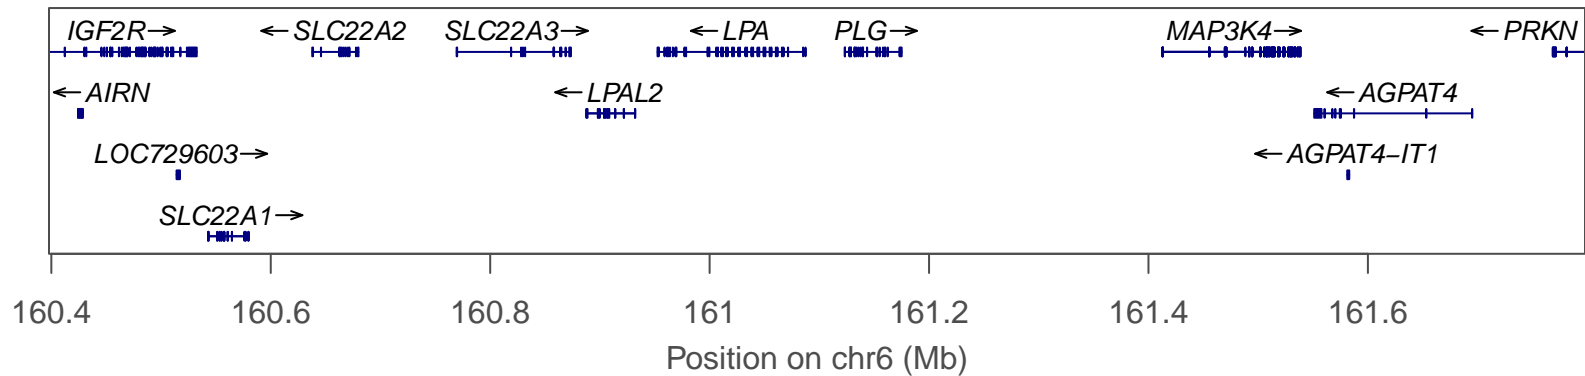

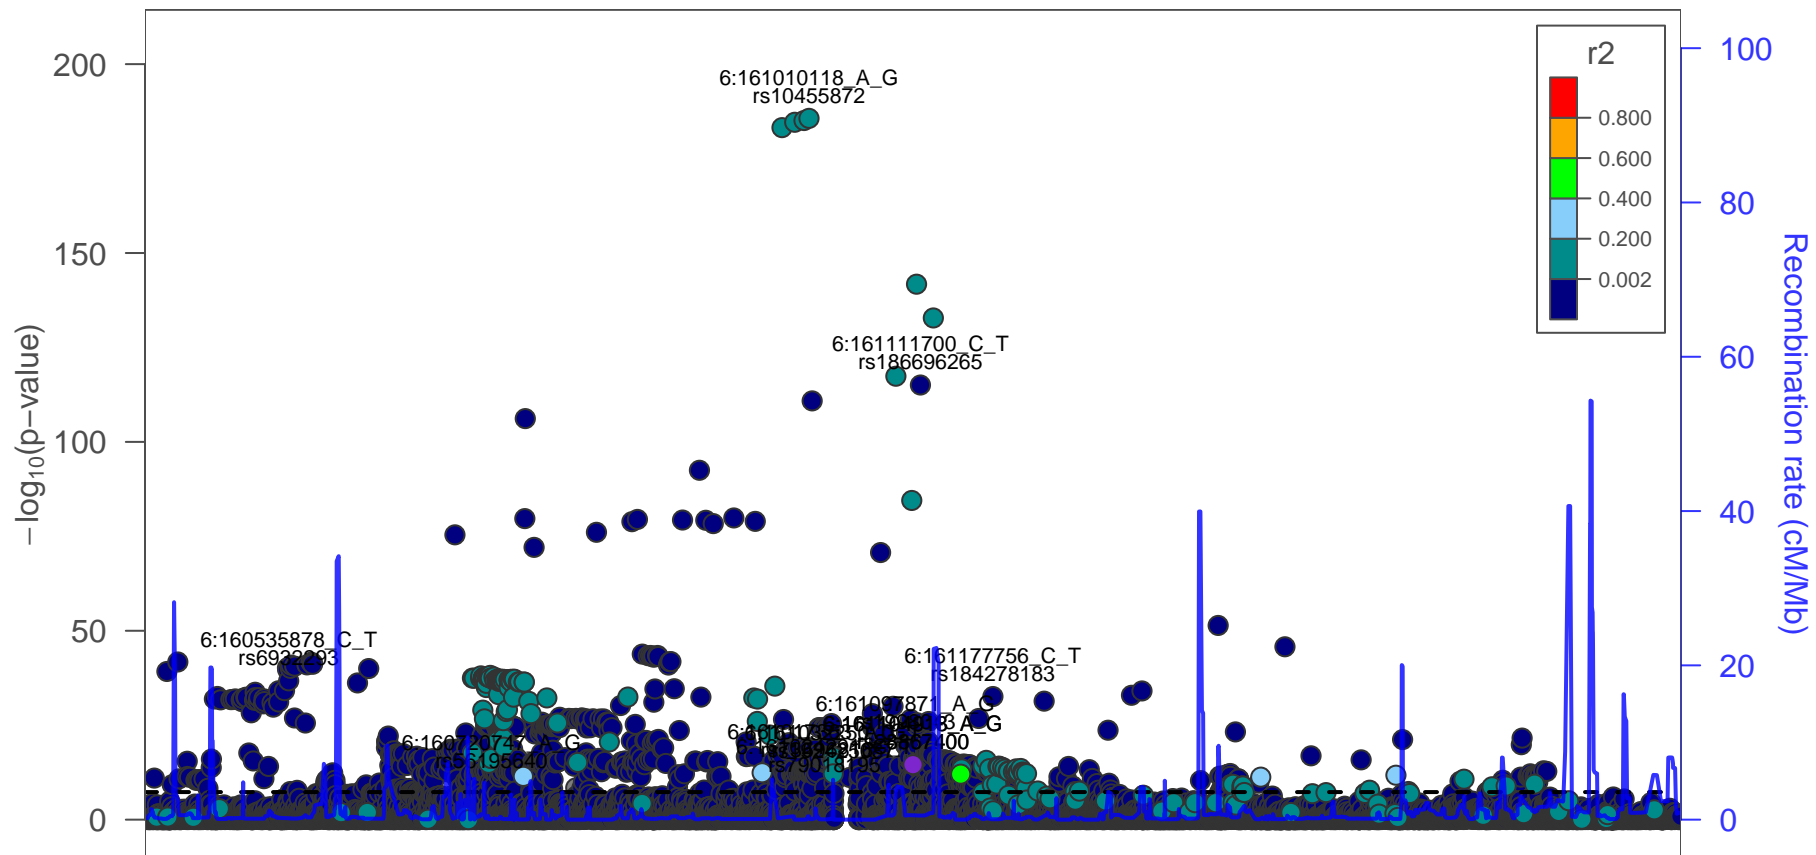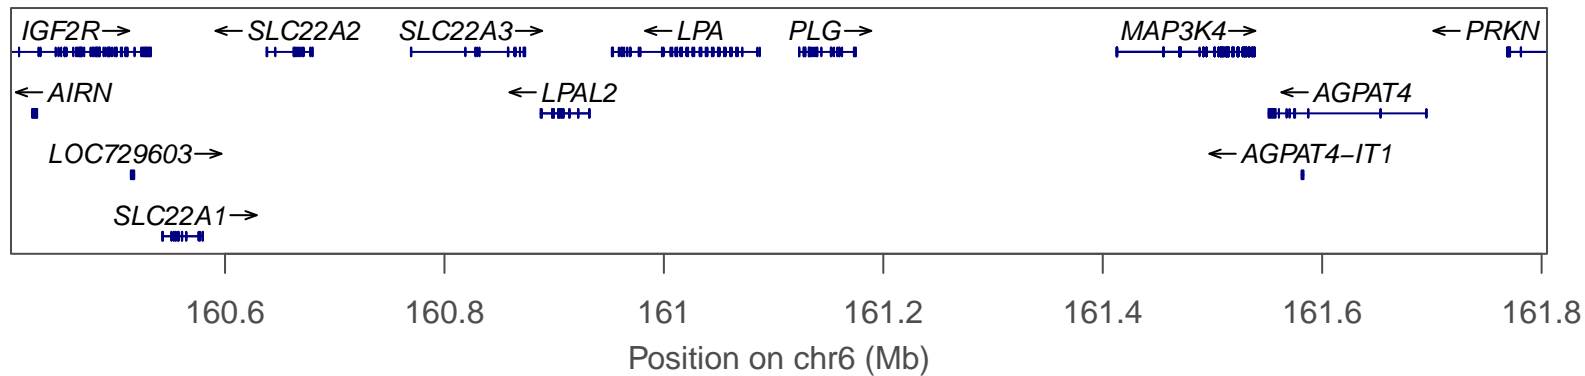

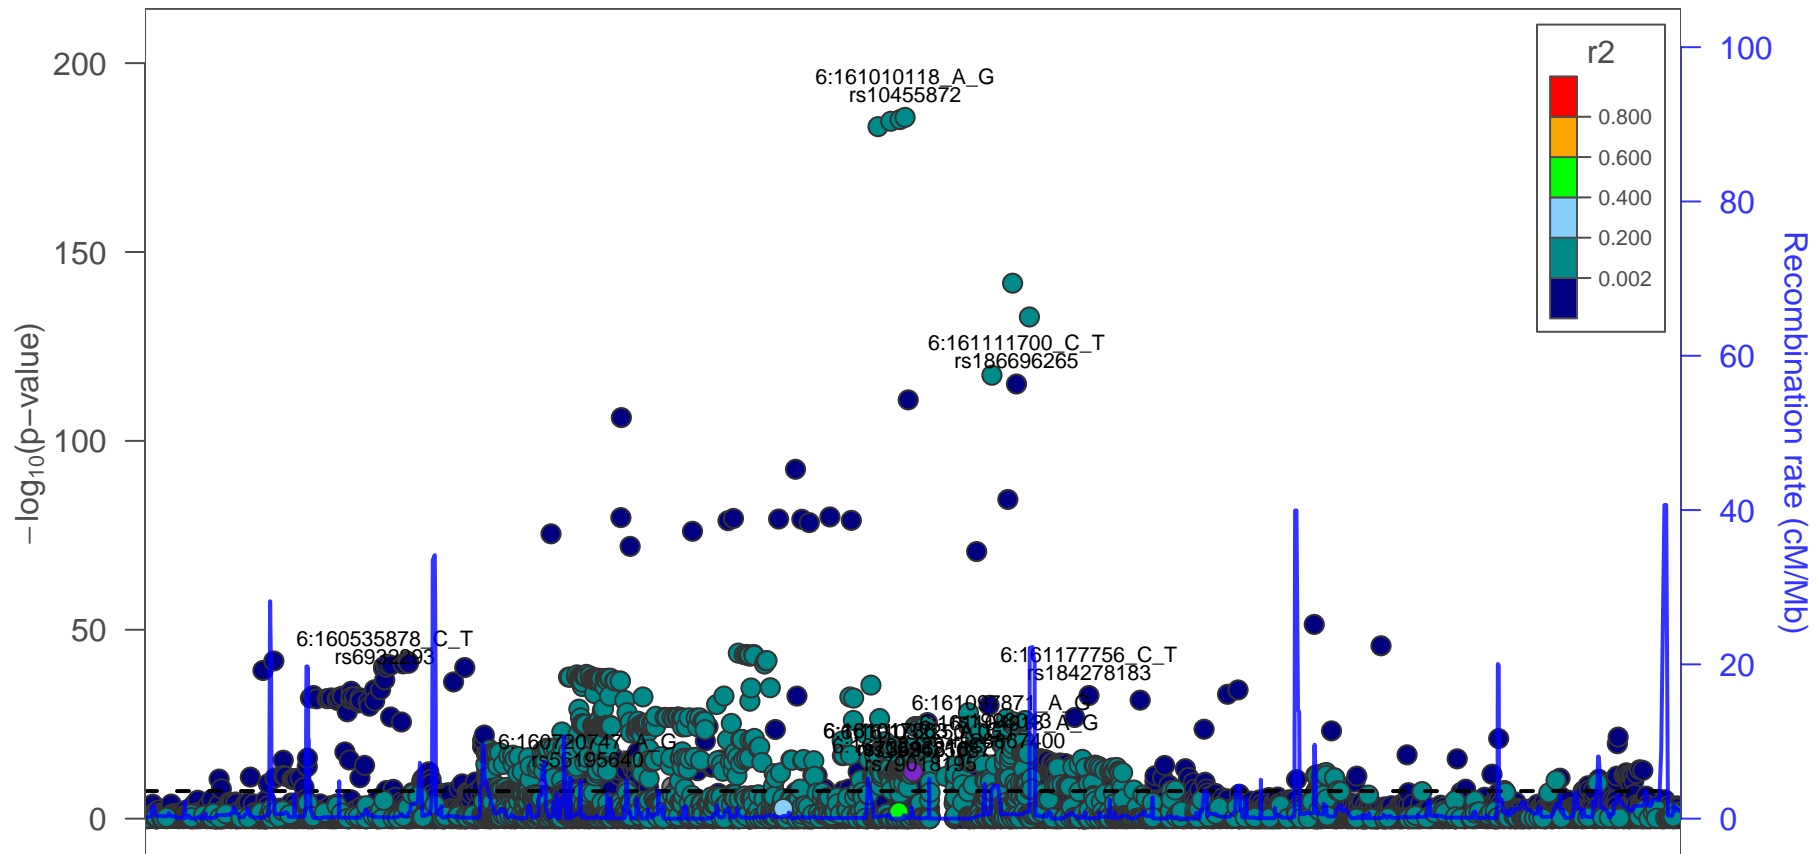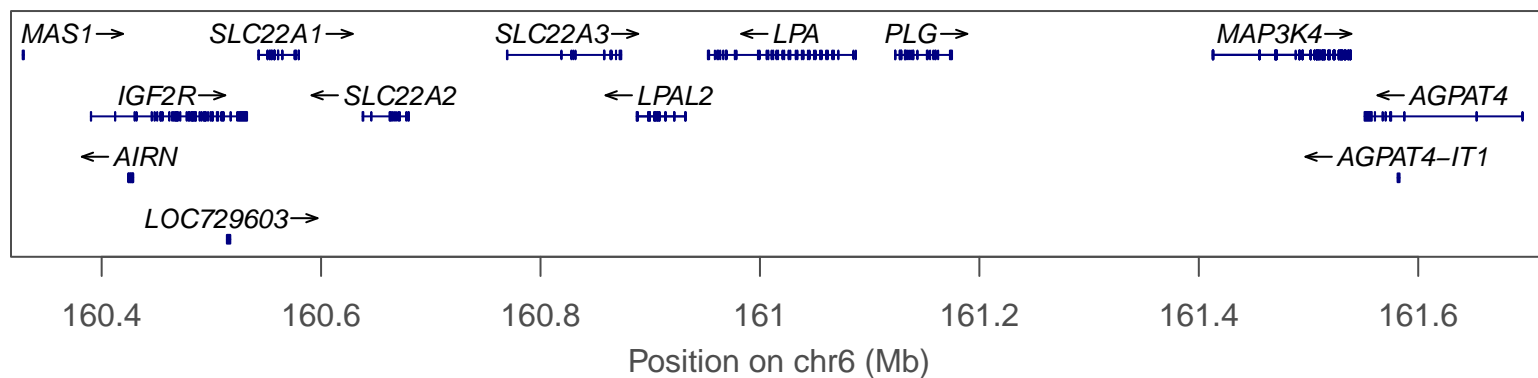

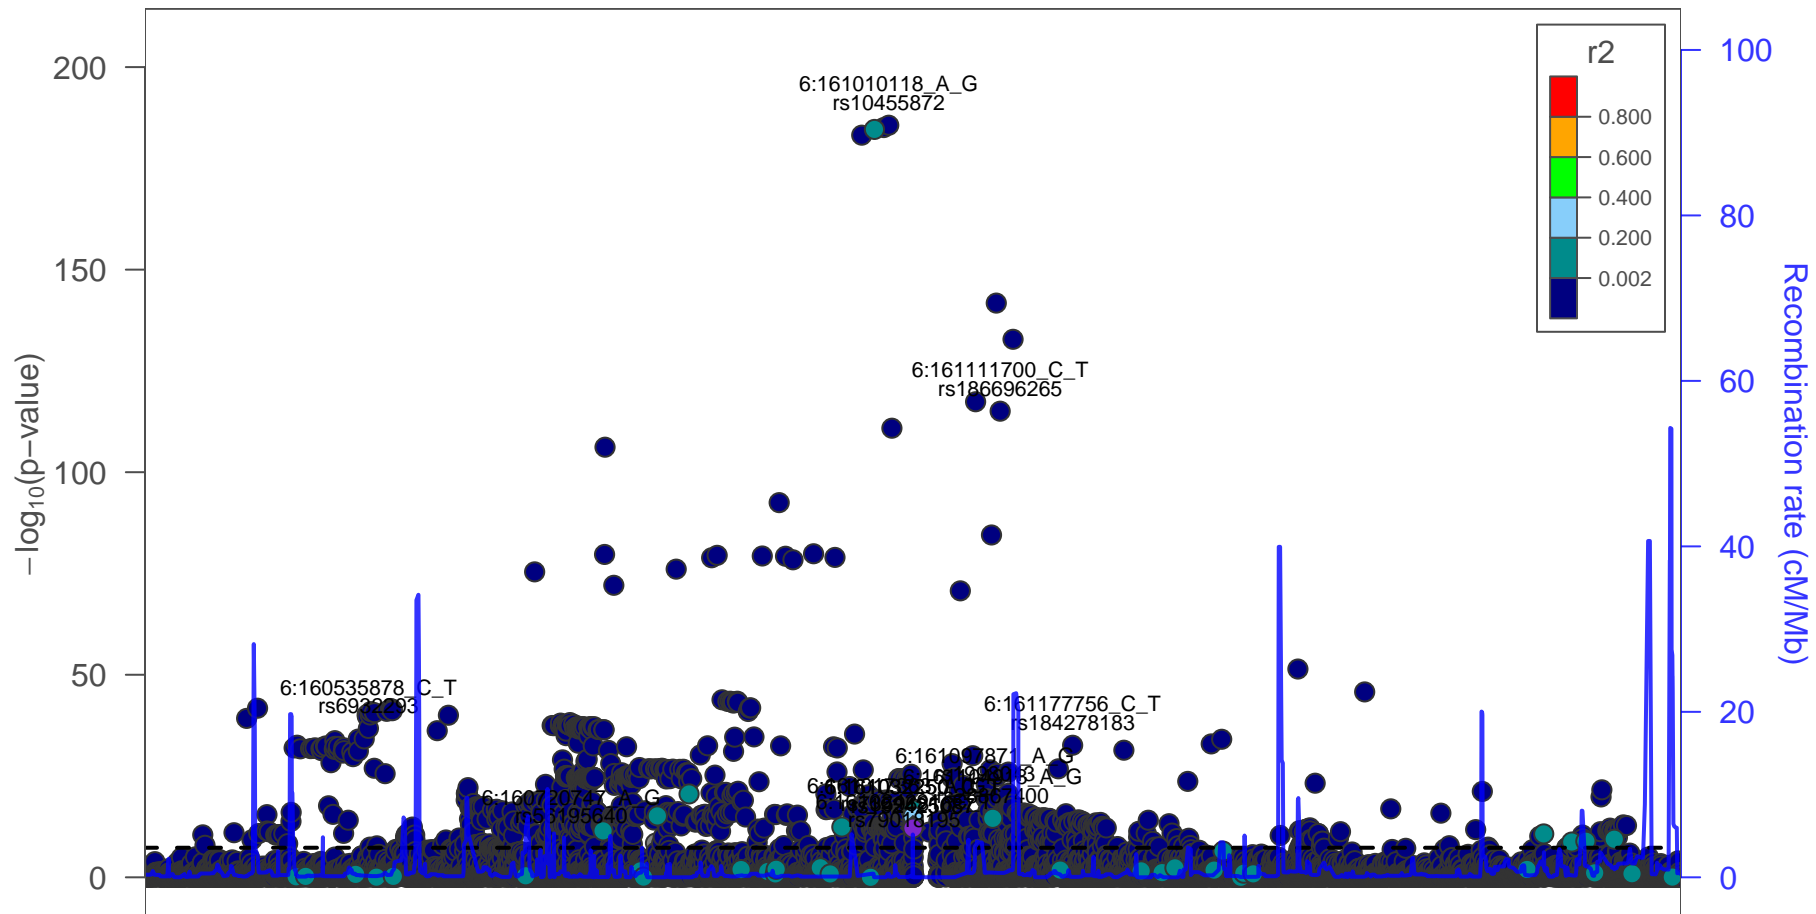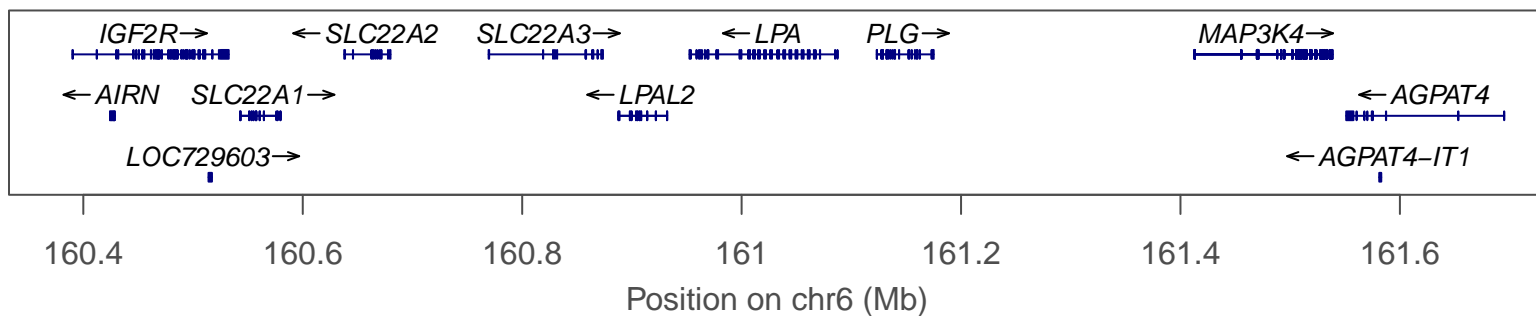





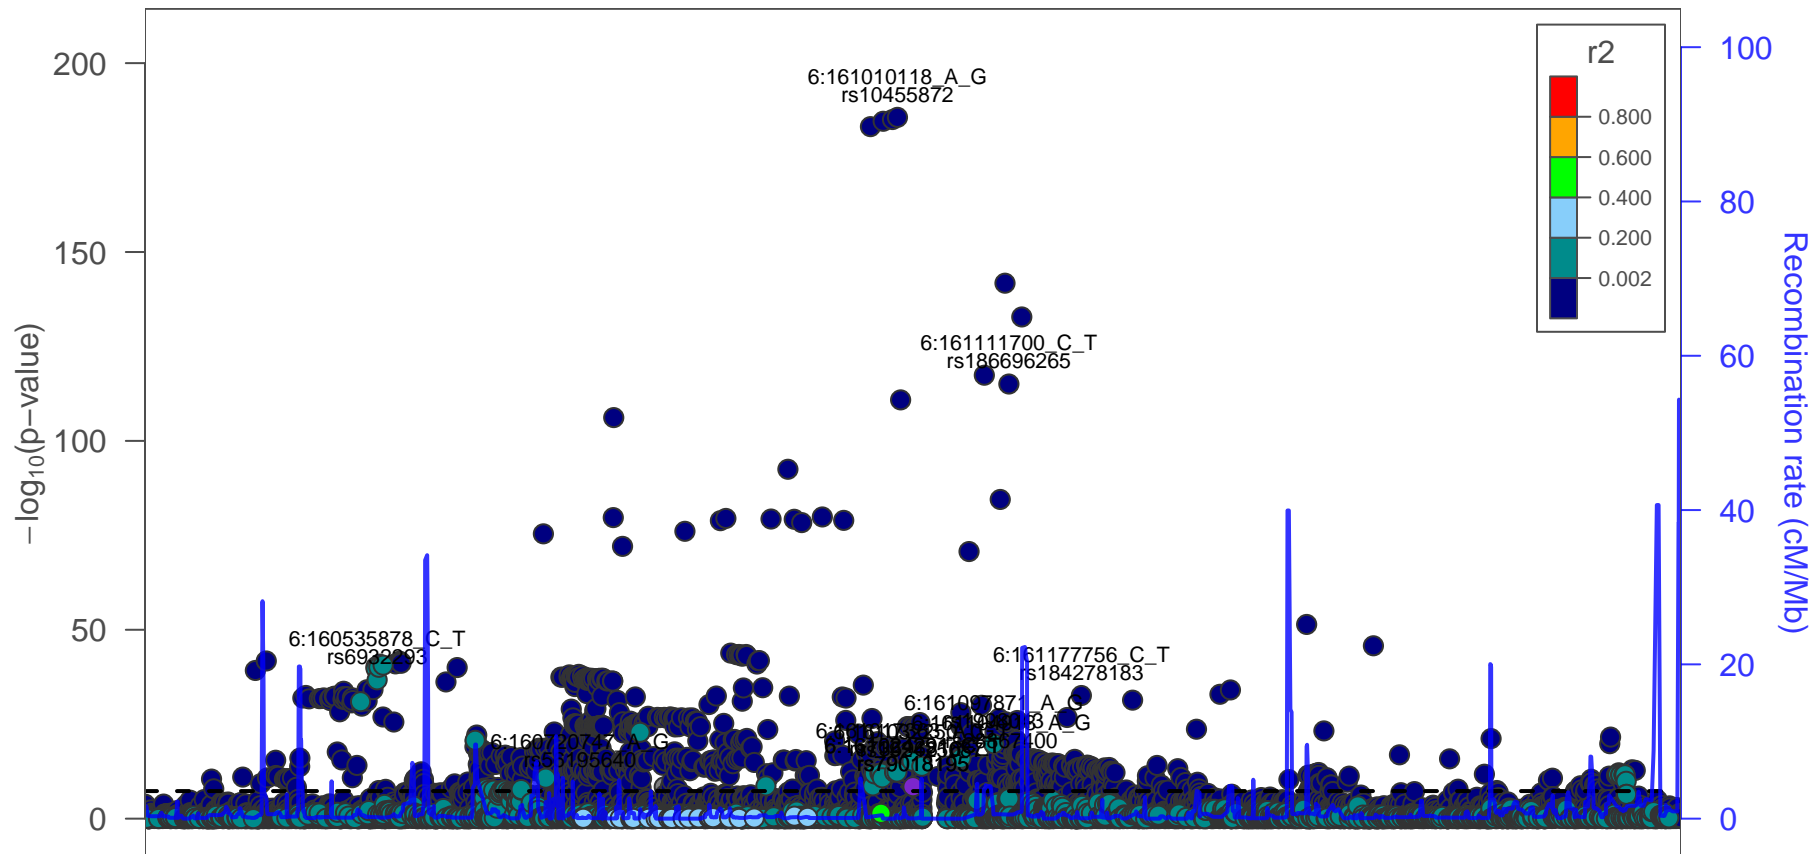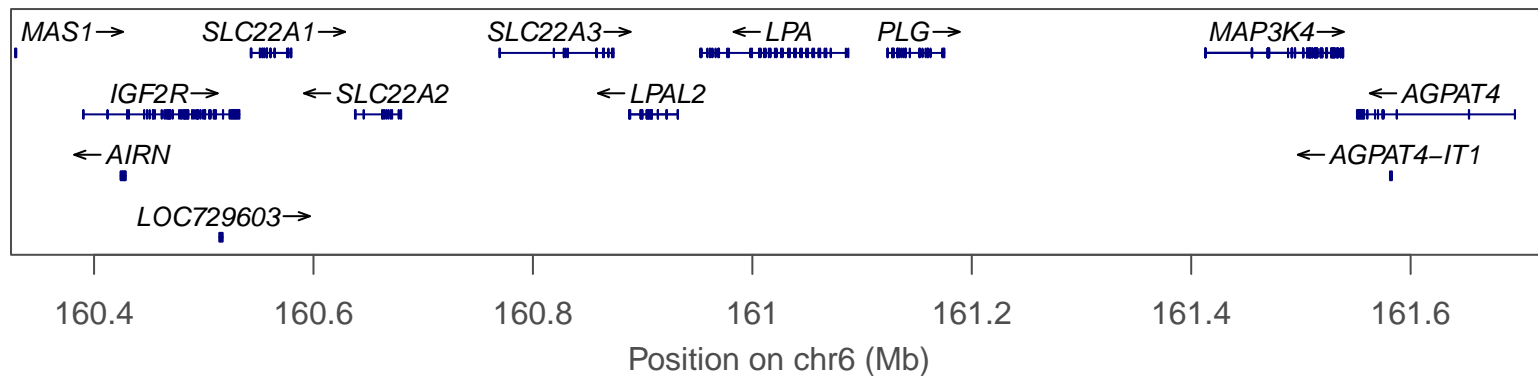

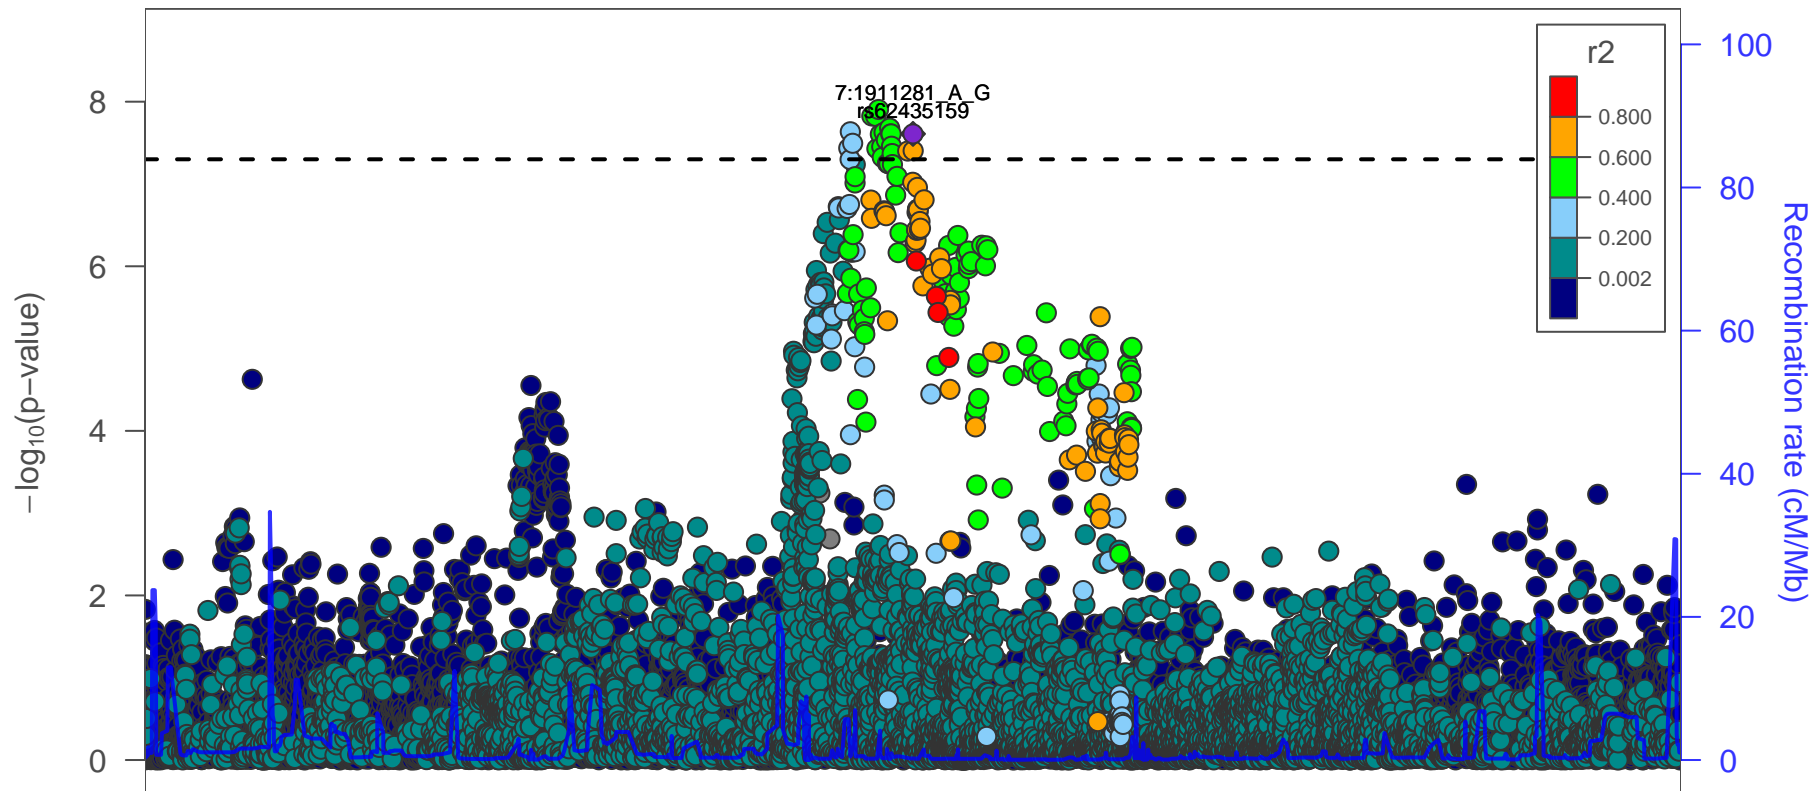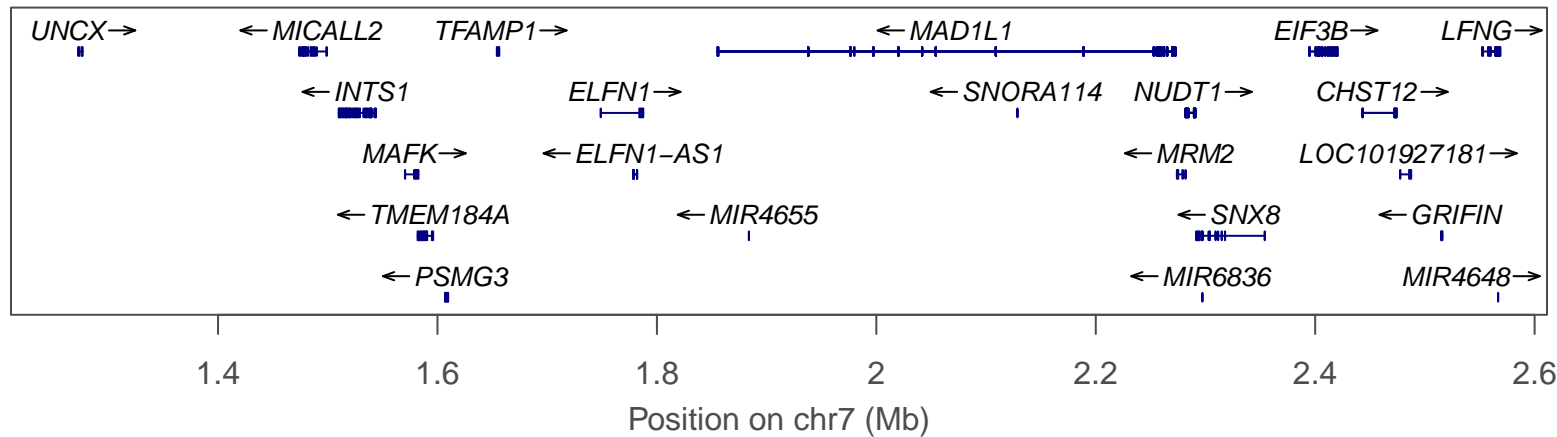

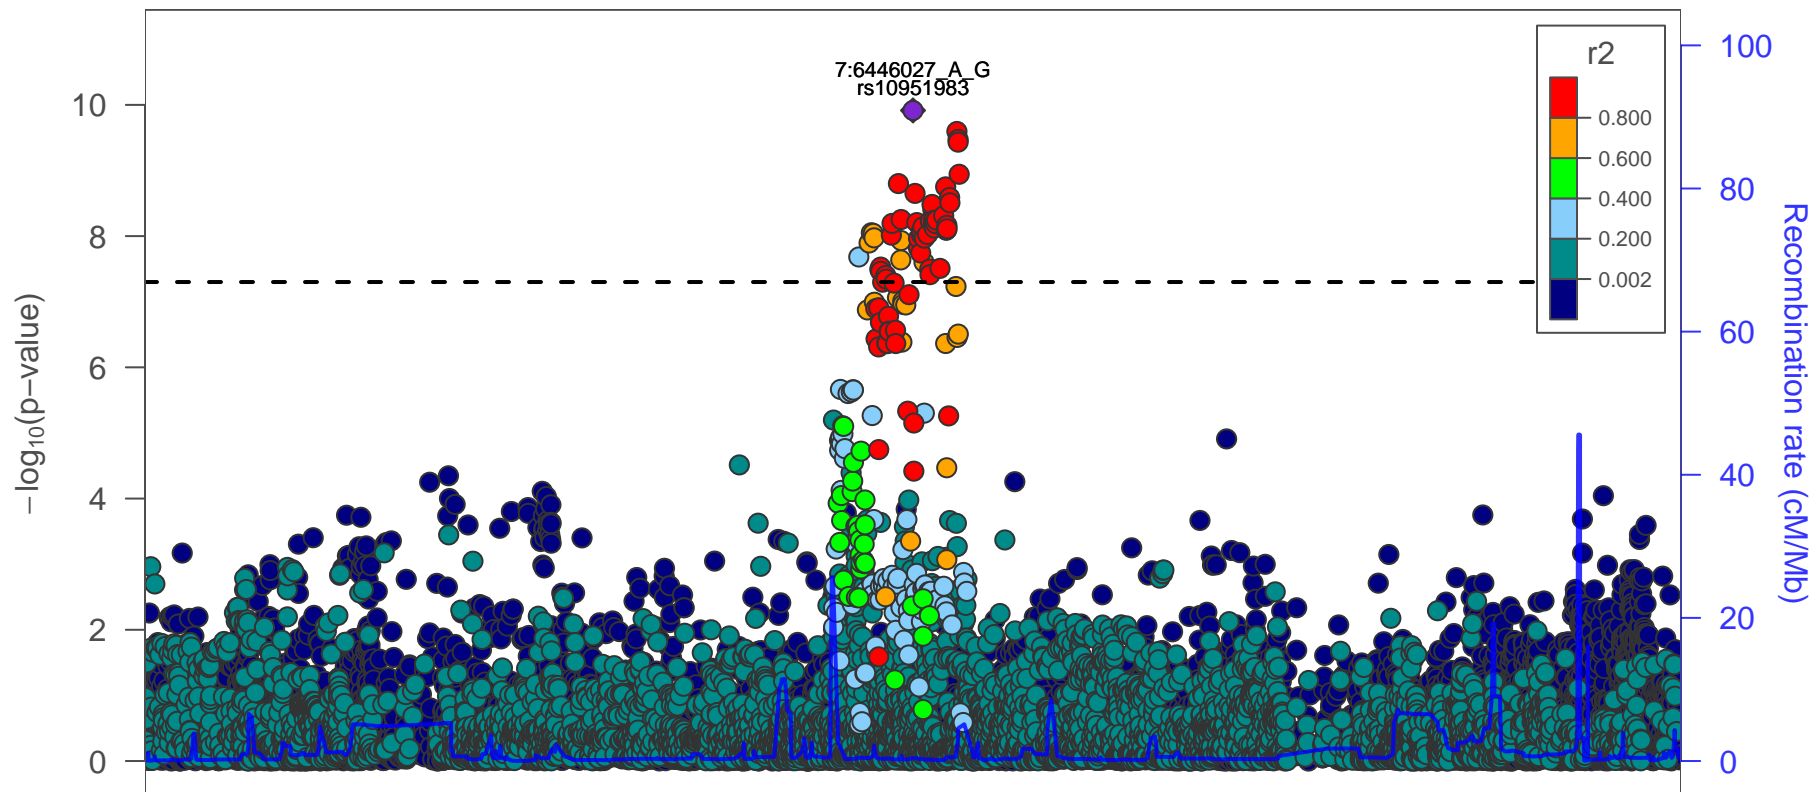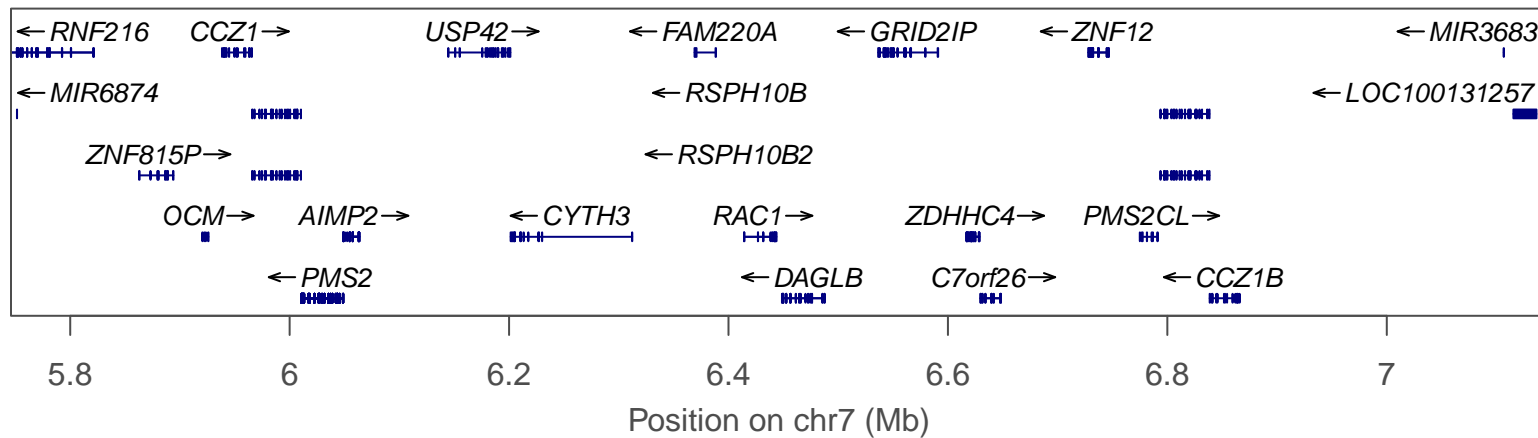

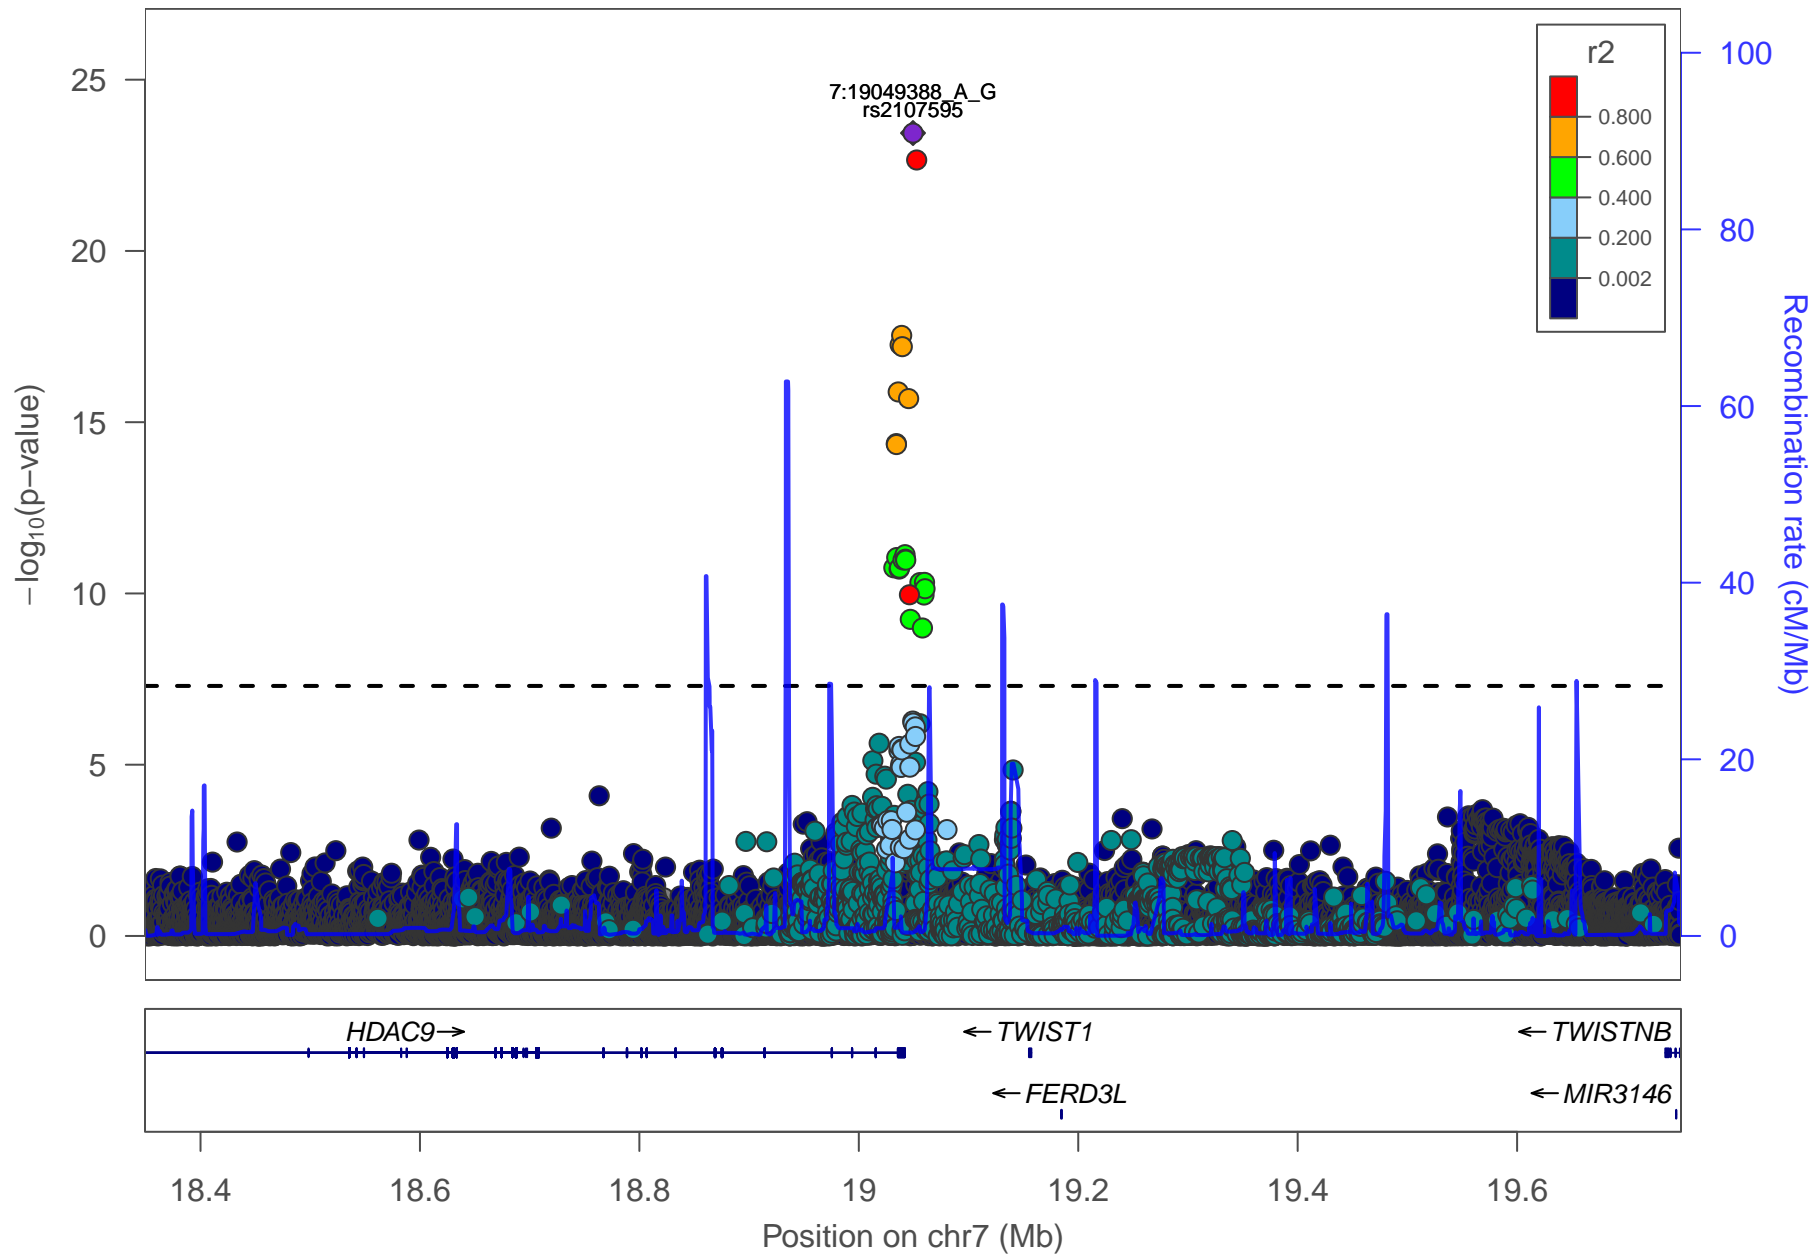

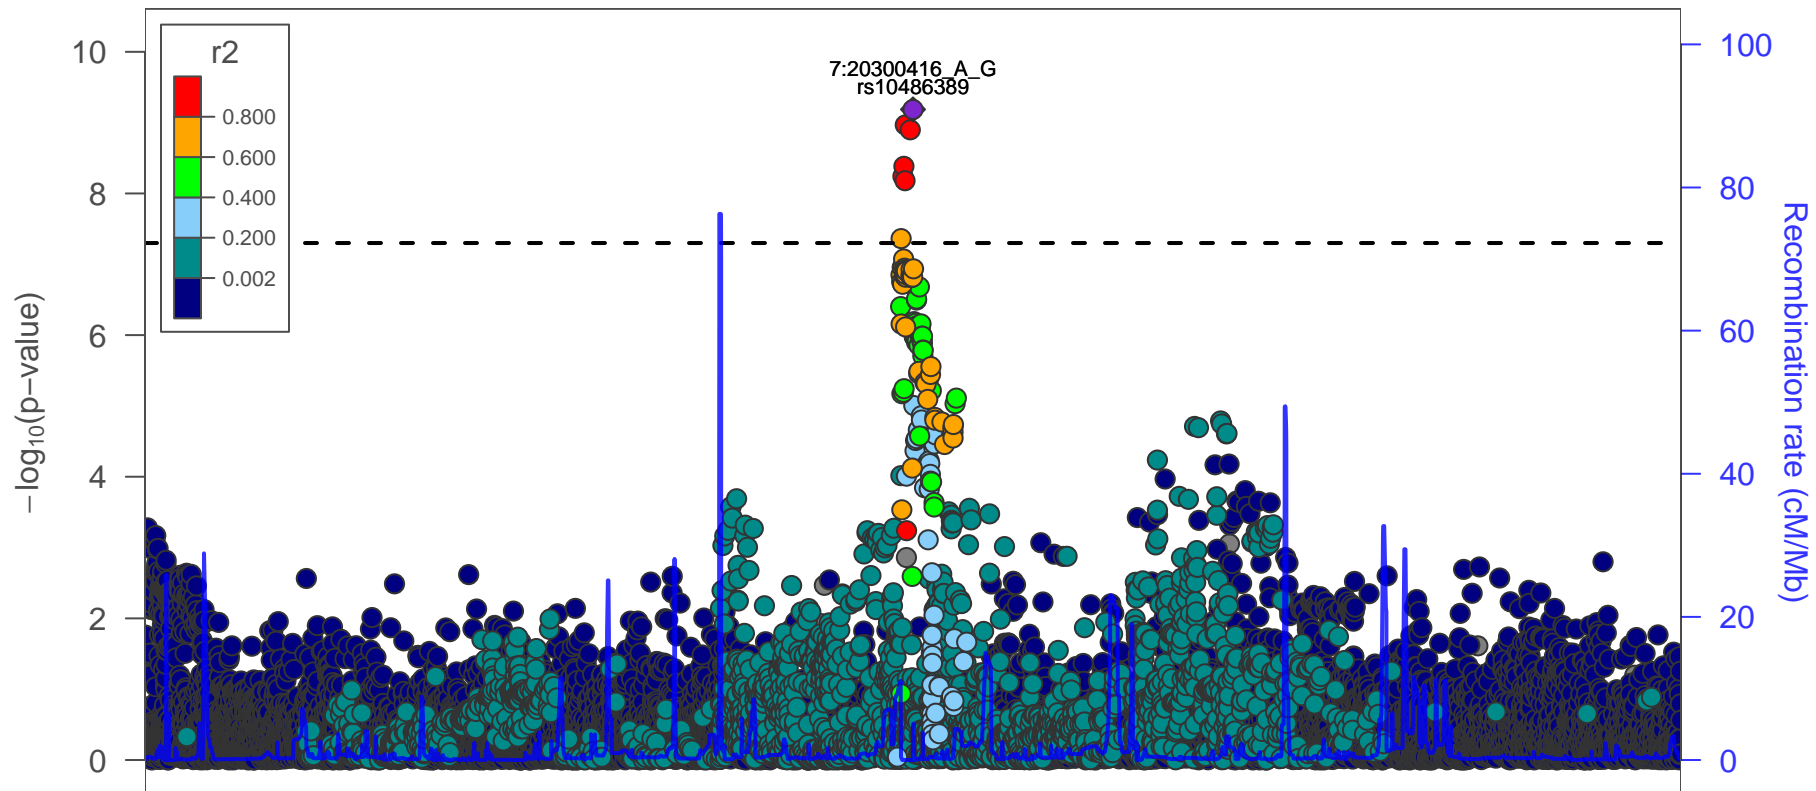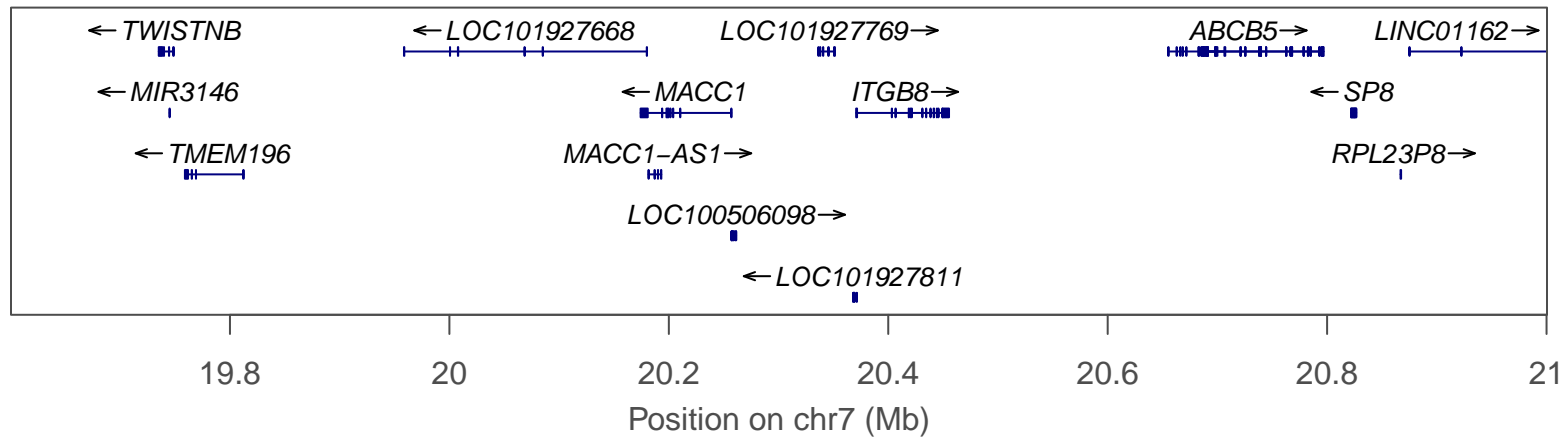

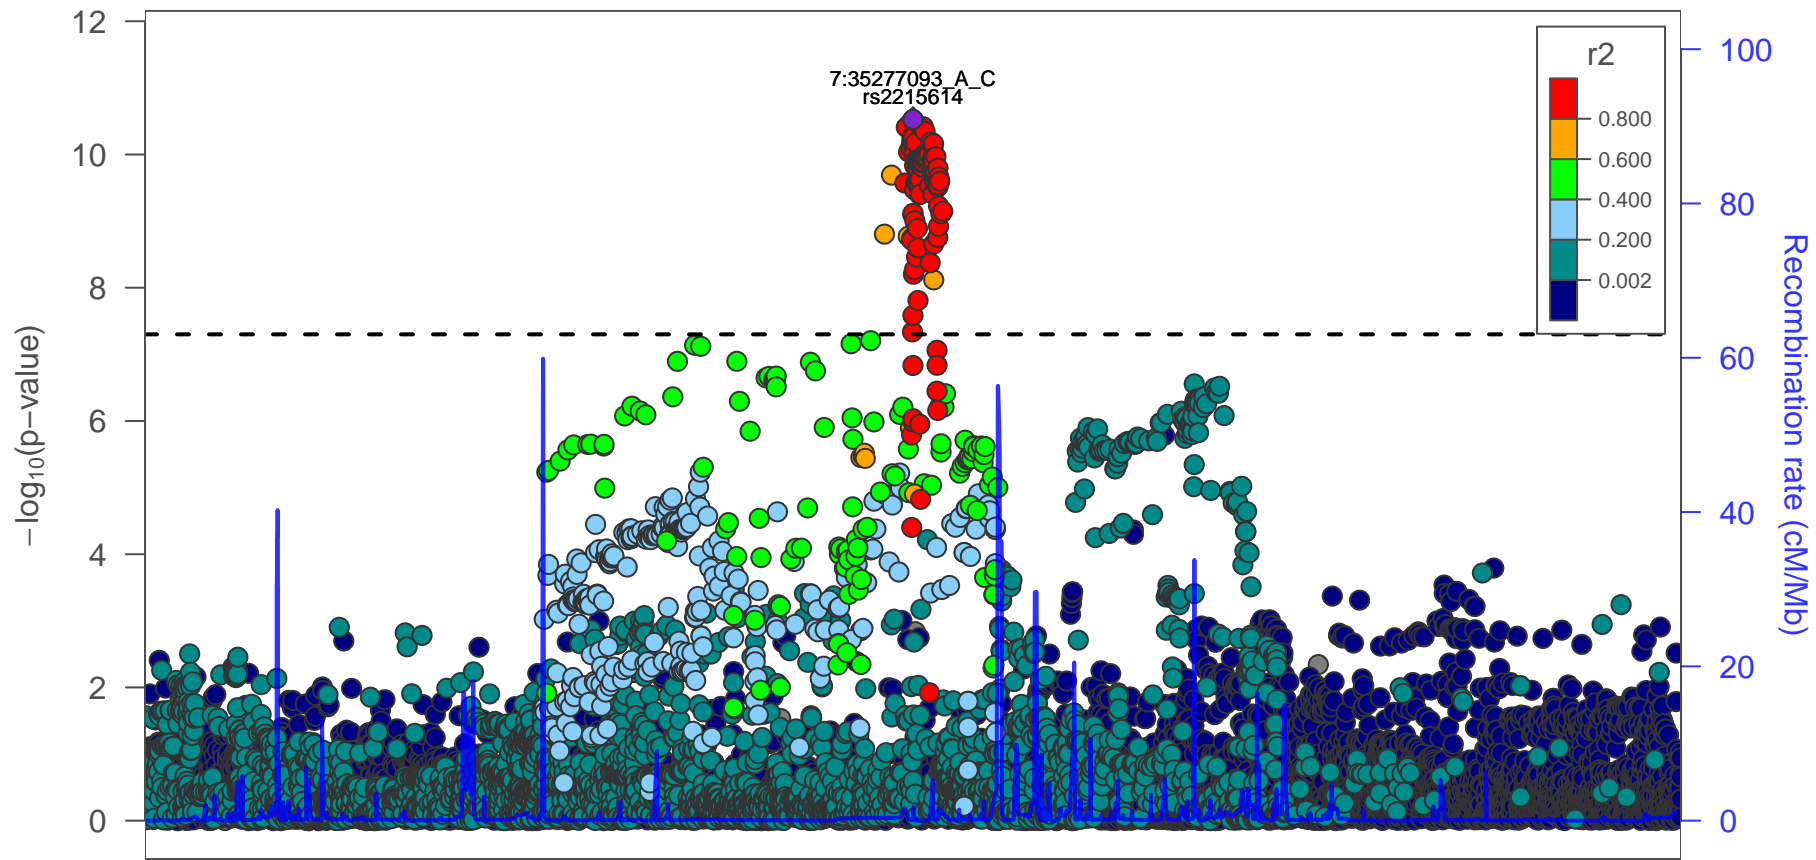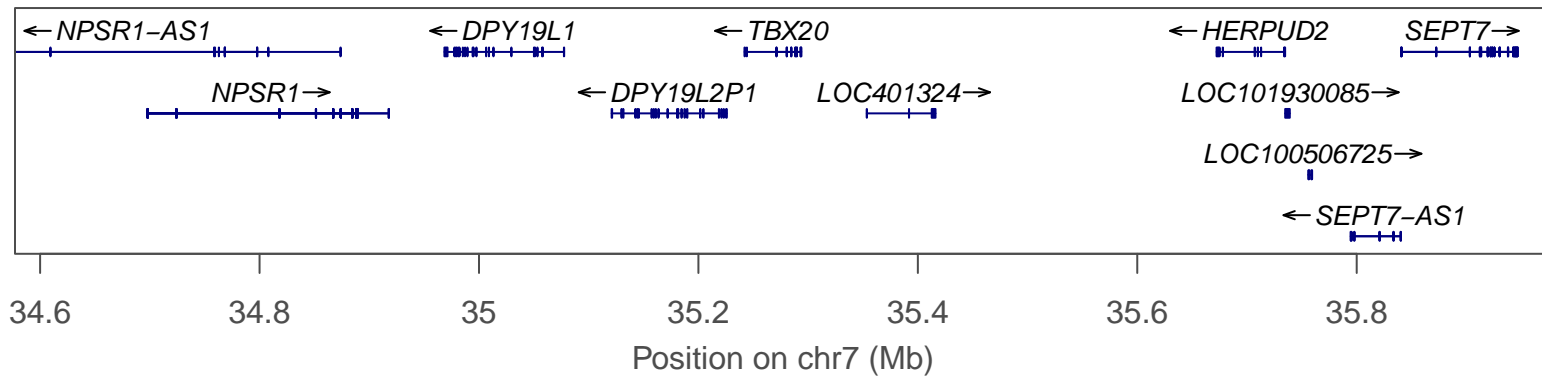

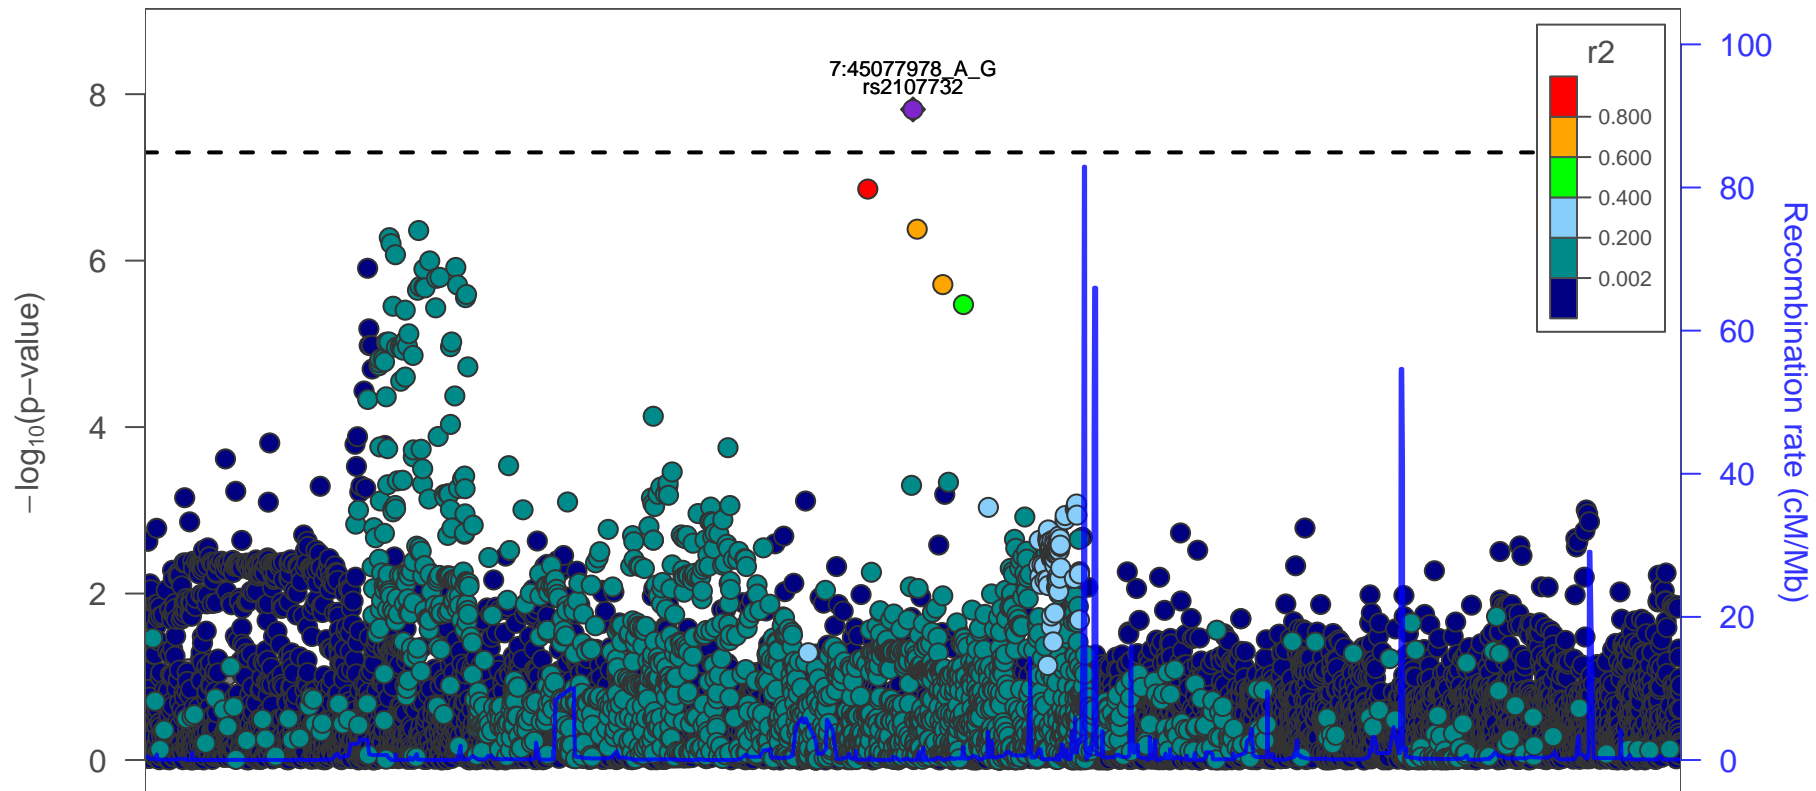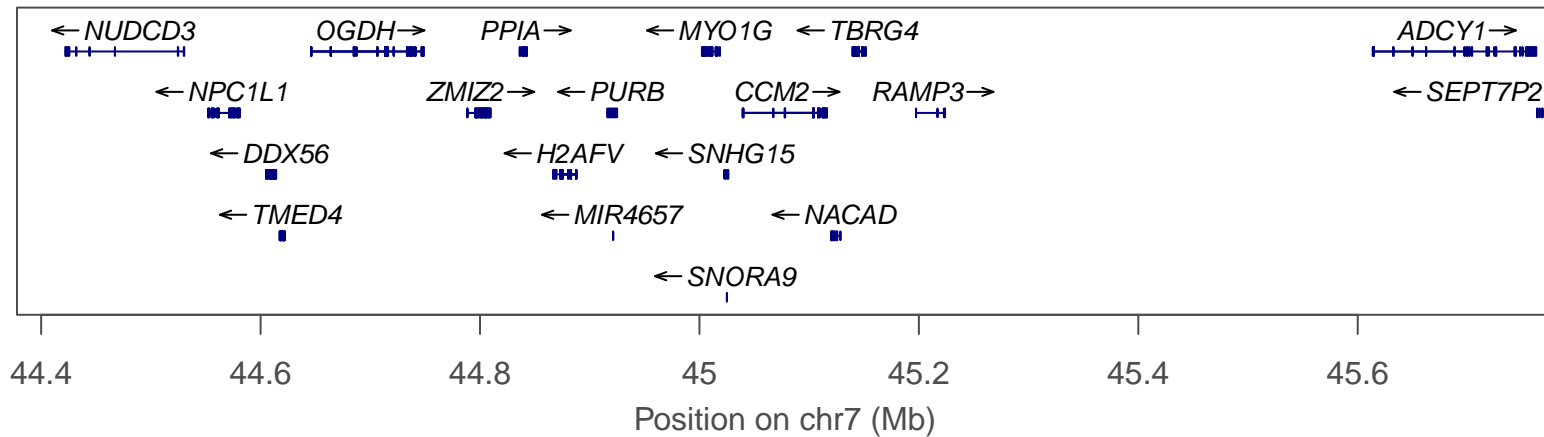



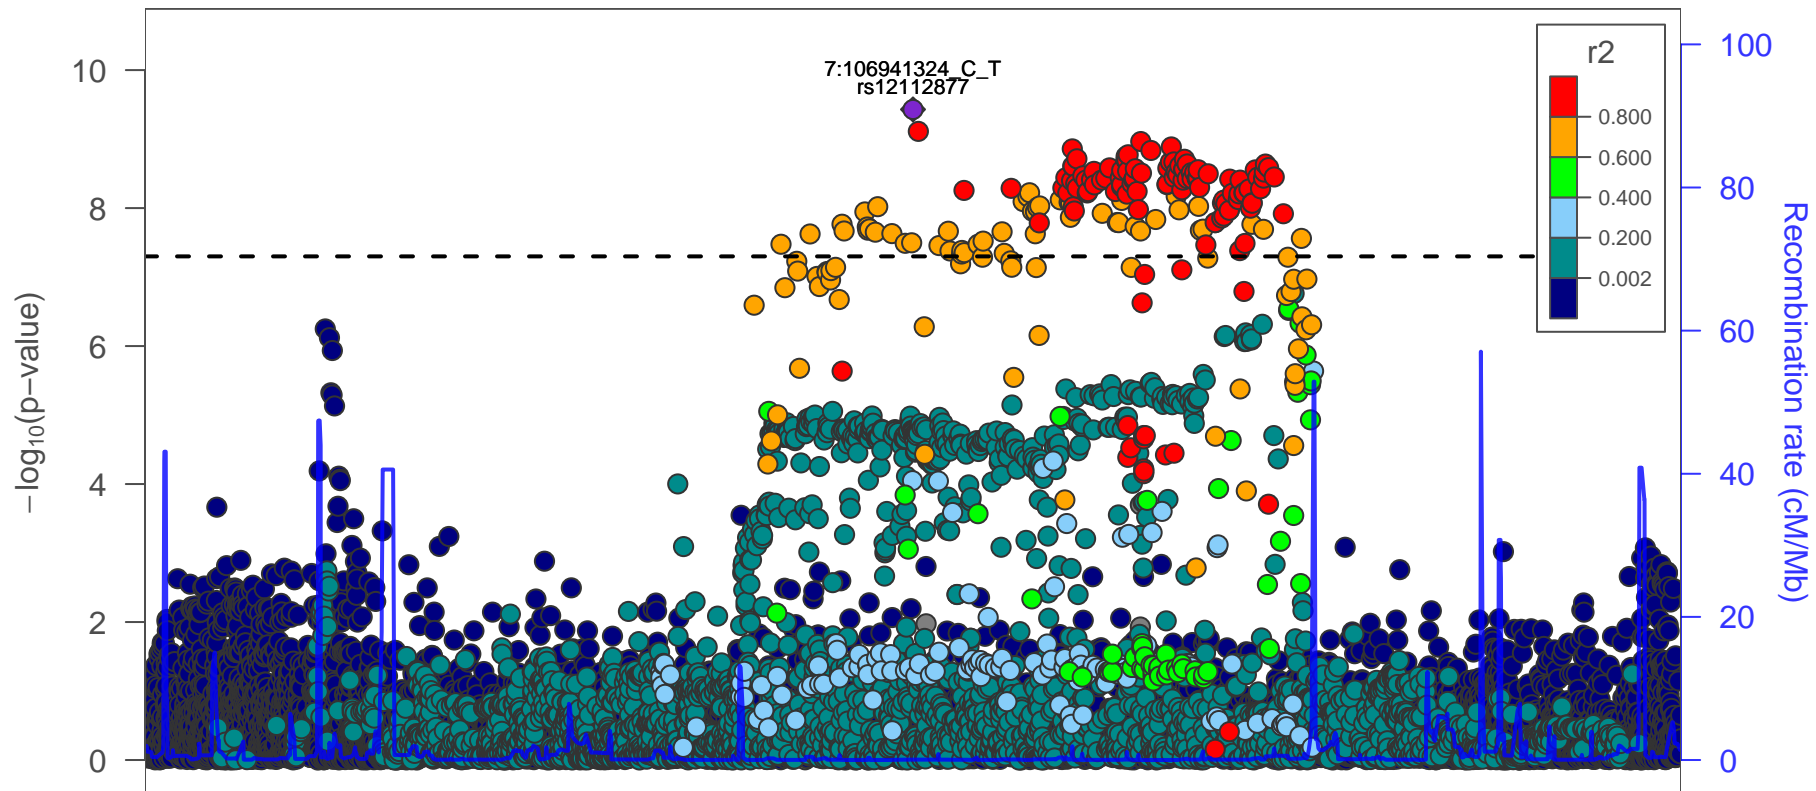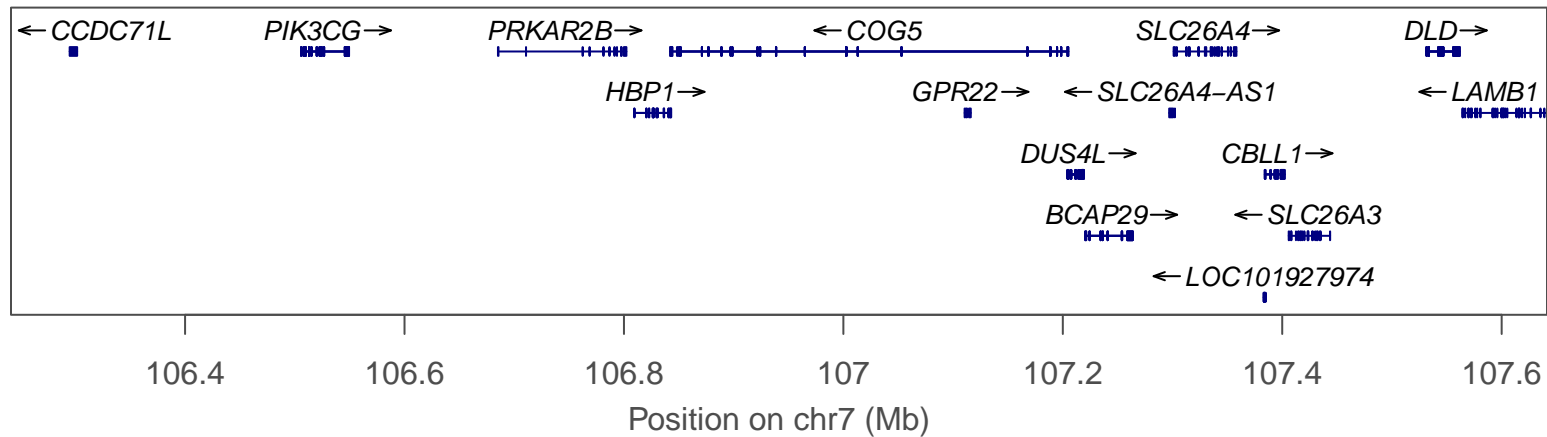

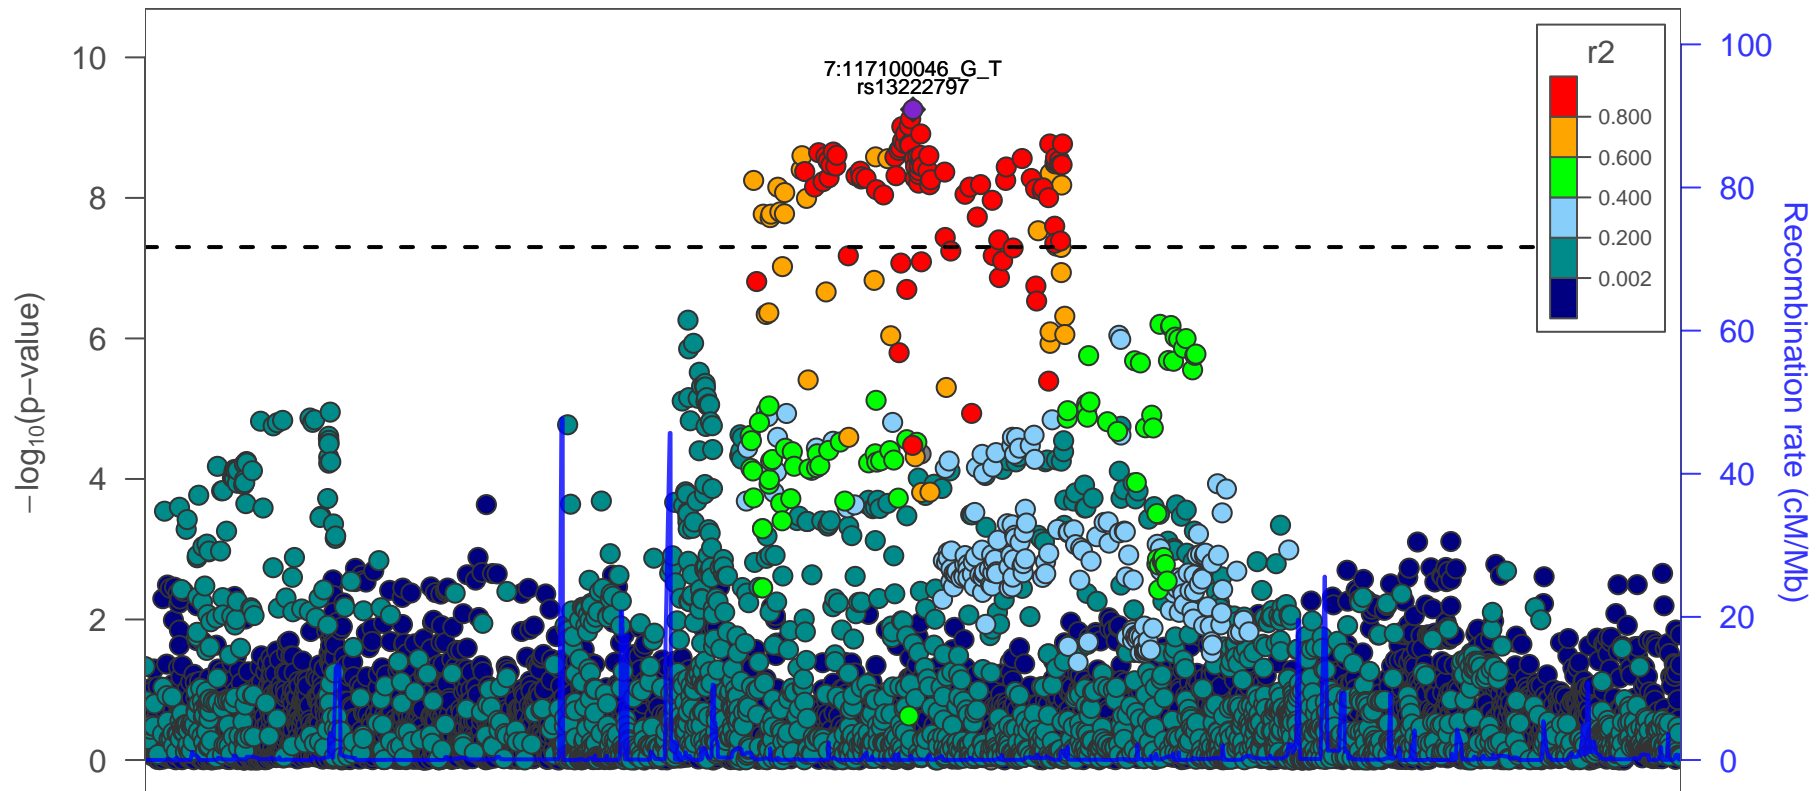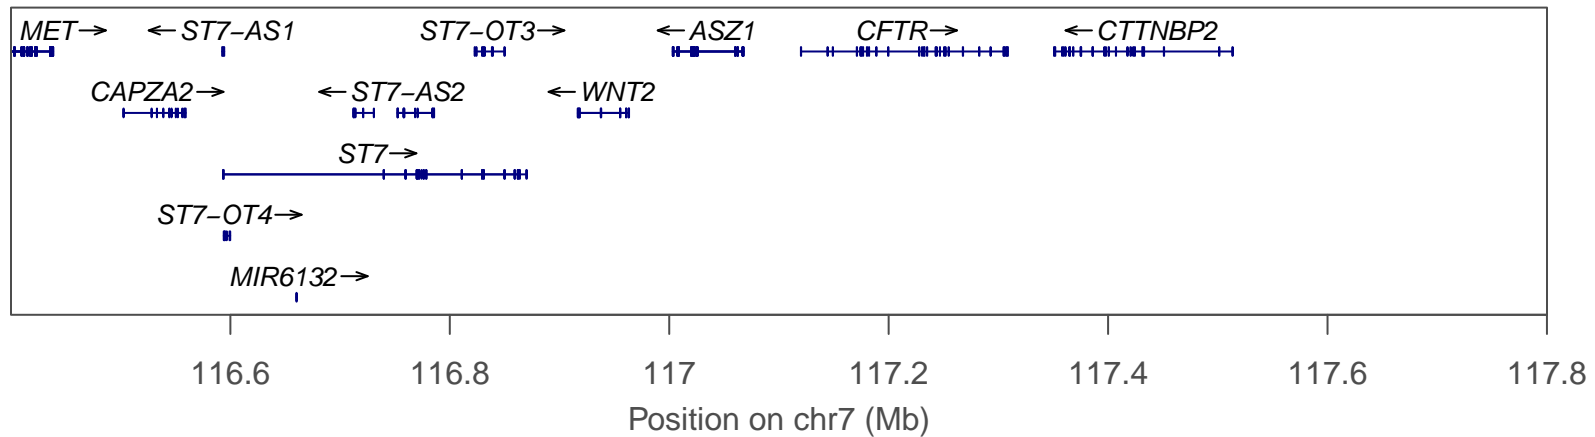

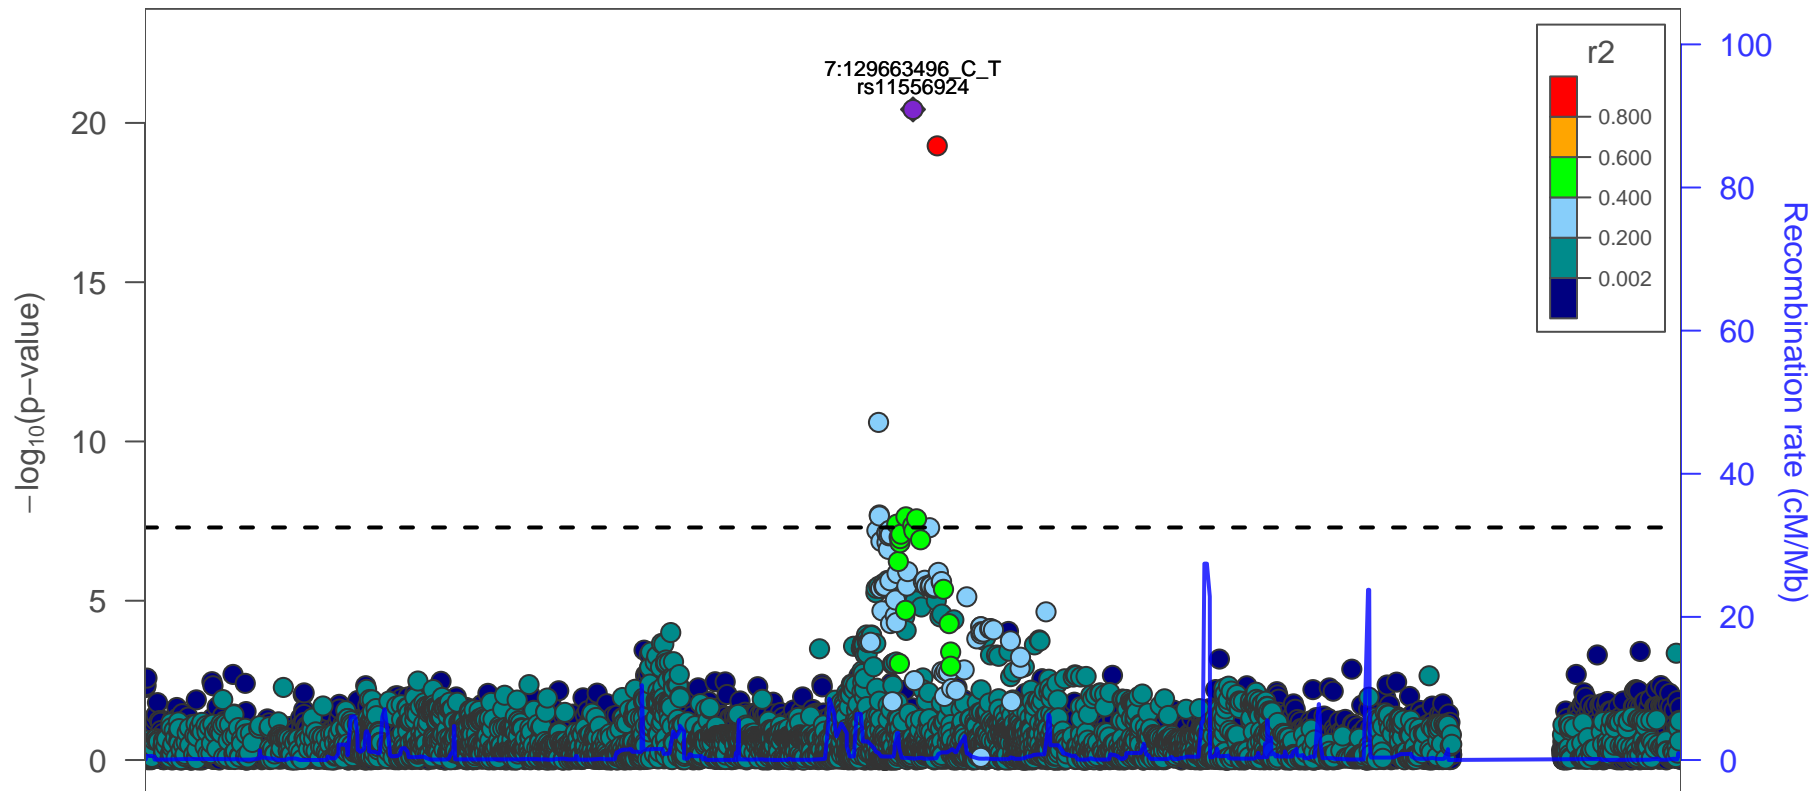

7:129663496\_C\_T  
rs11556924



Recombination rate (cM/Mb)

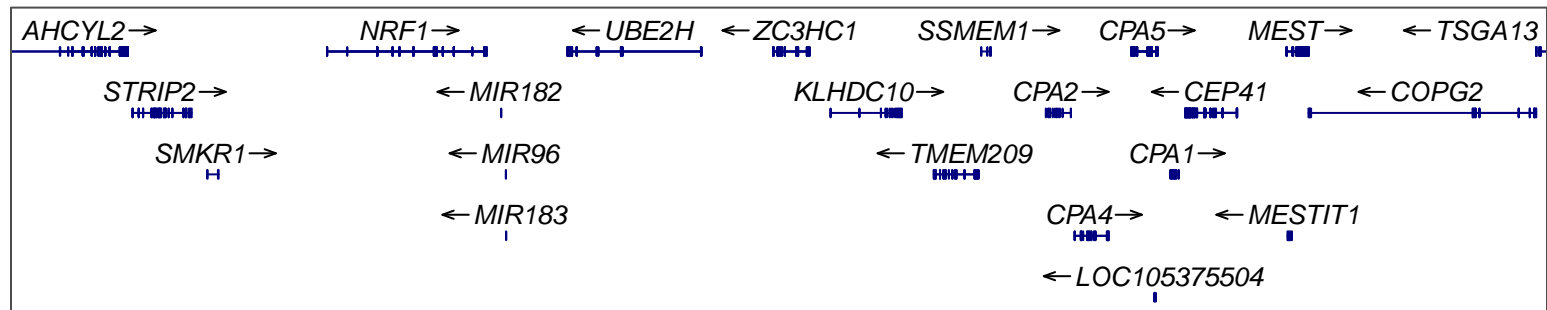

129 129.2 129.4 129.6 129.8 130 130.2

Position on chr7 (Mb)

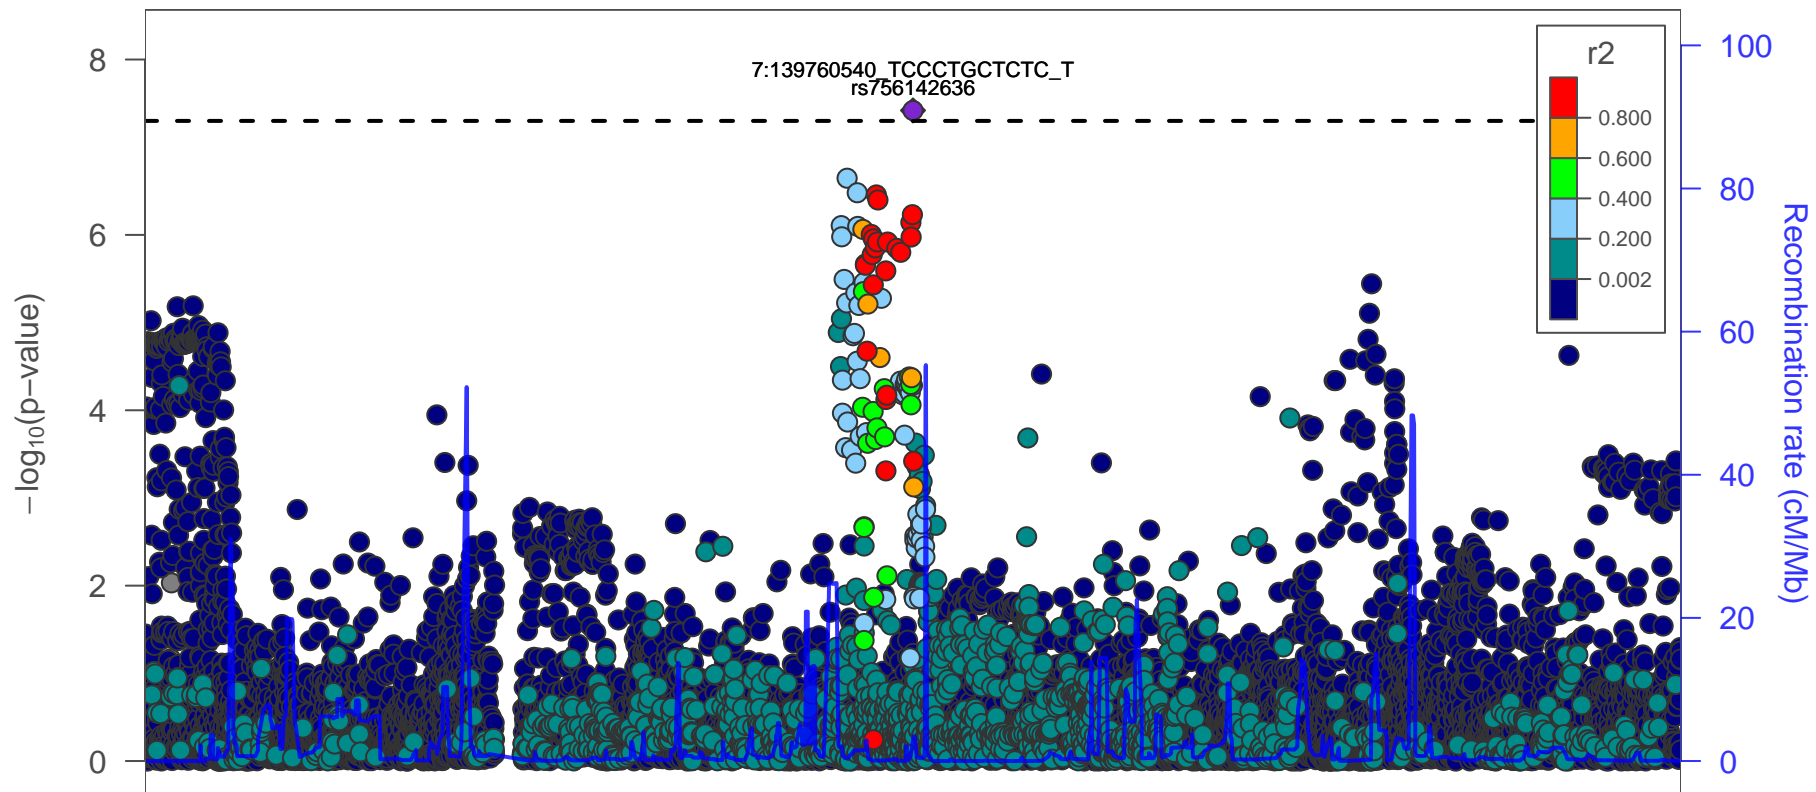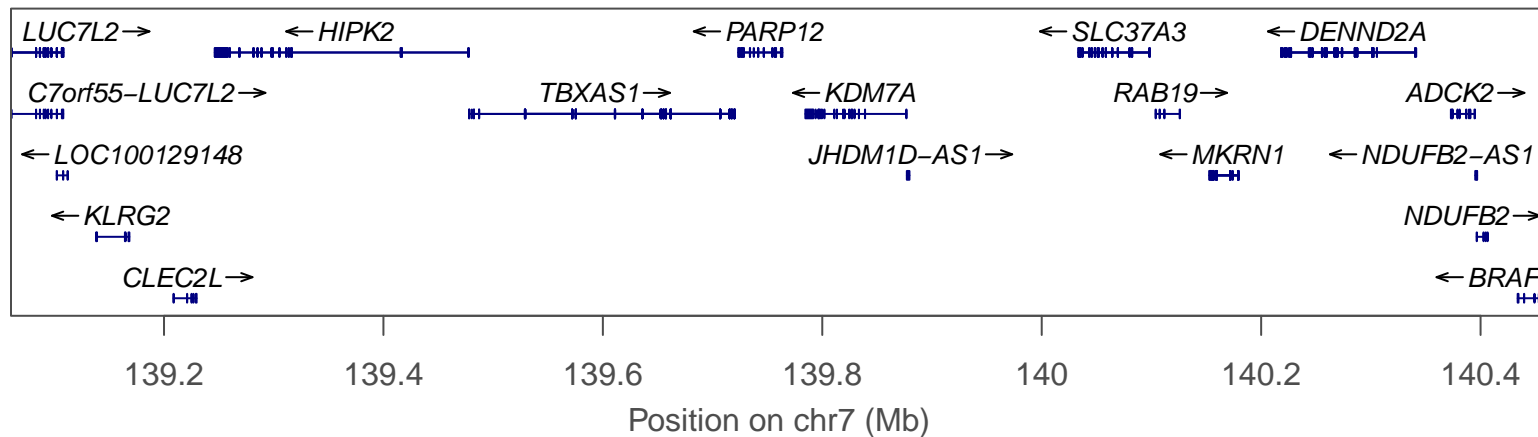

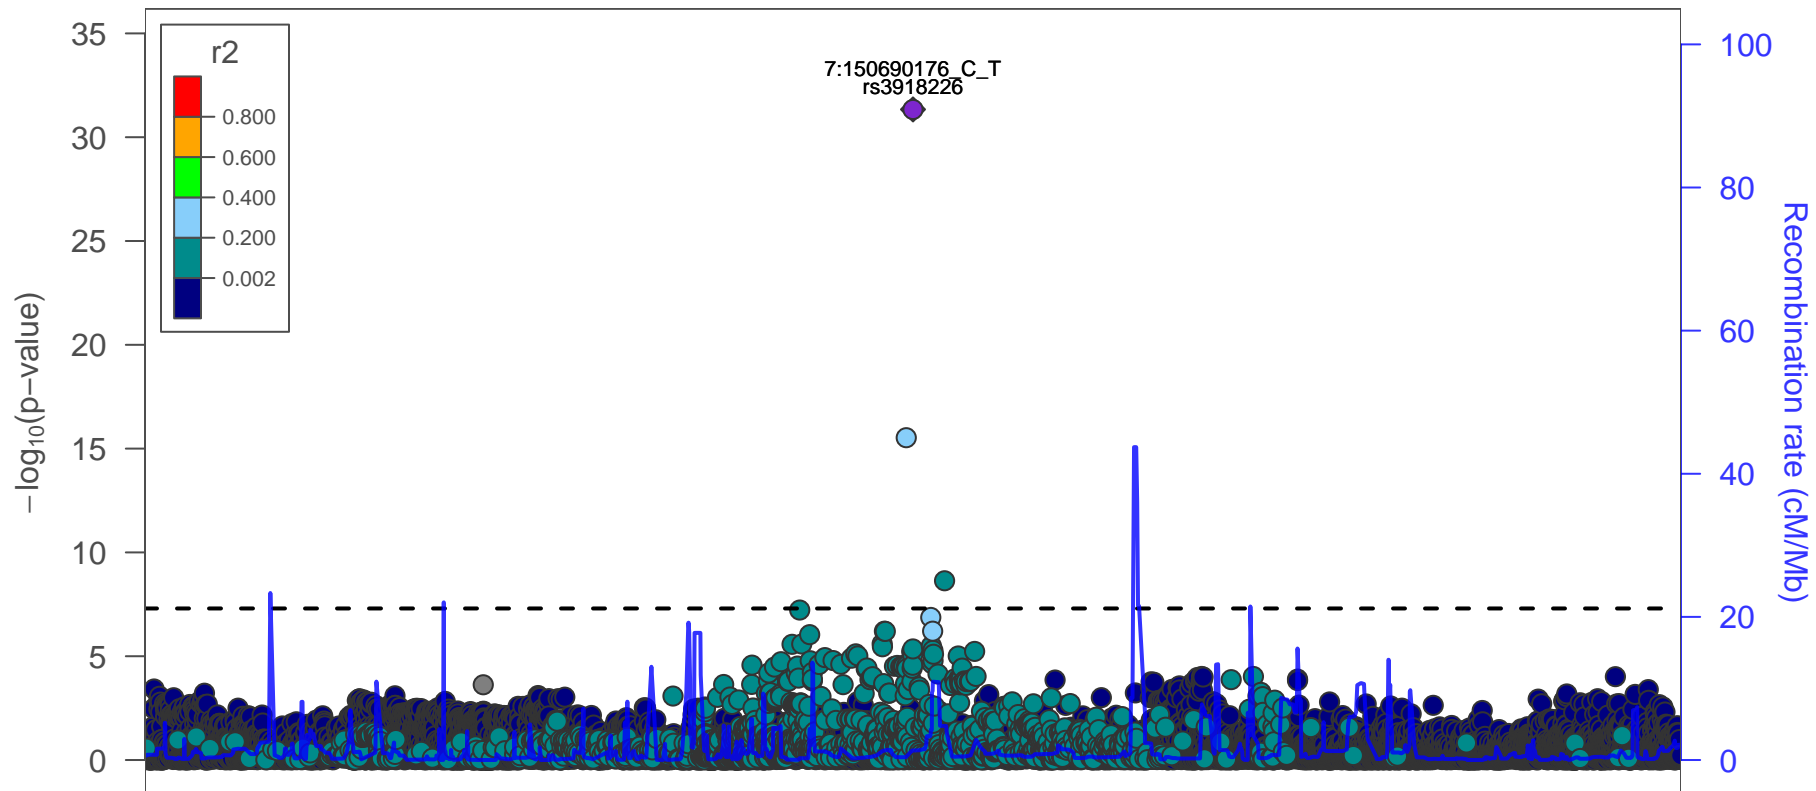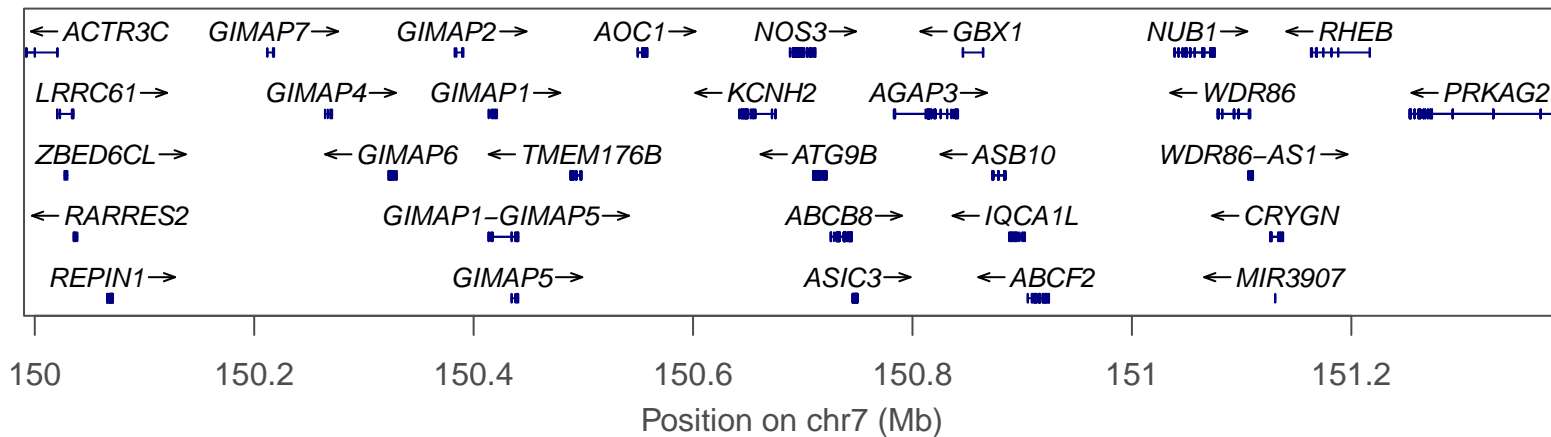

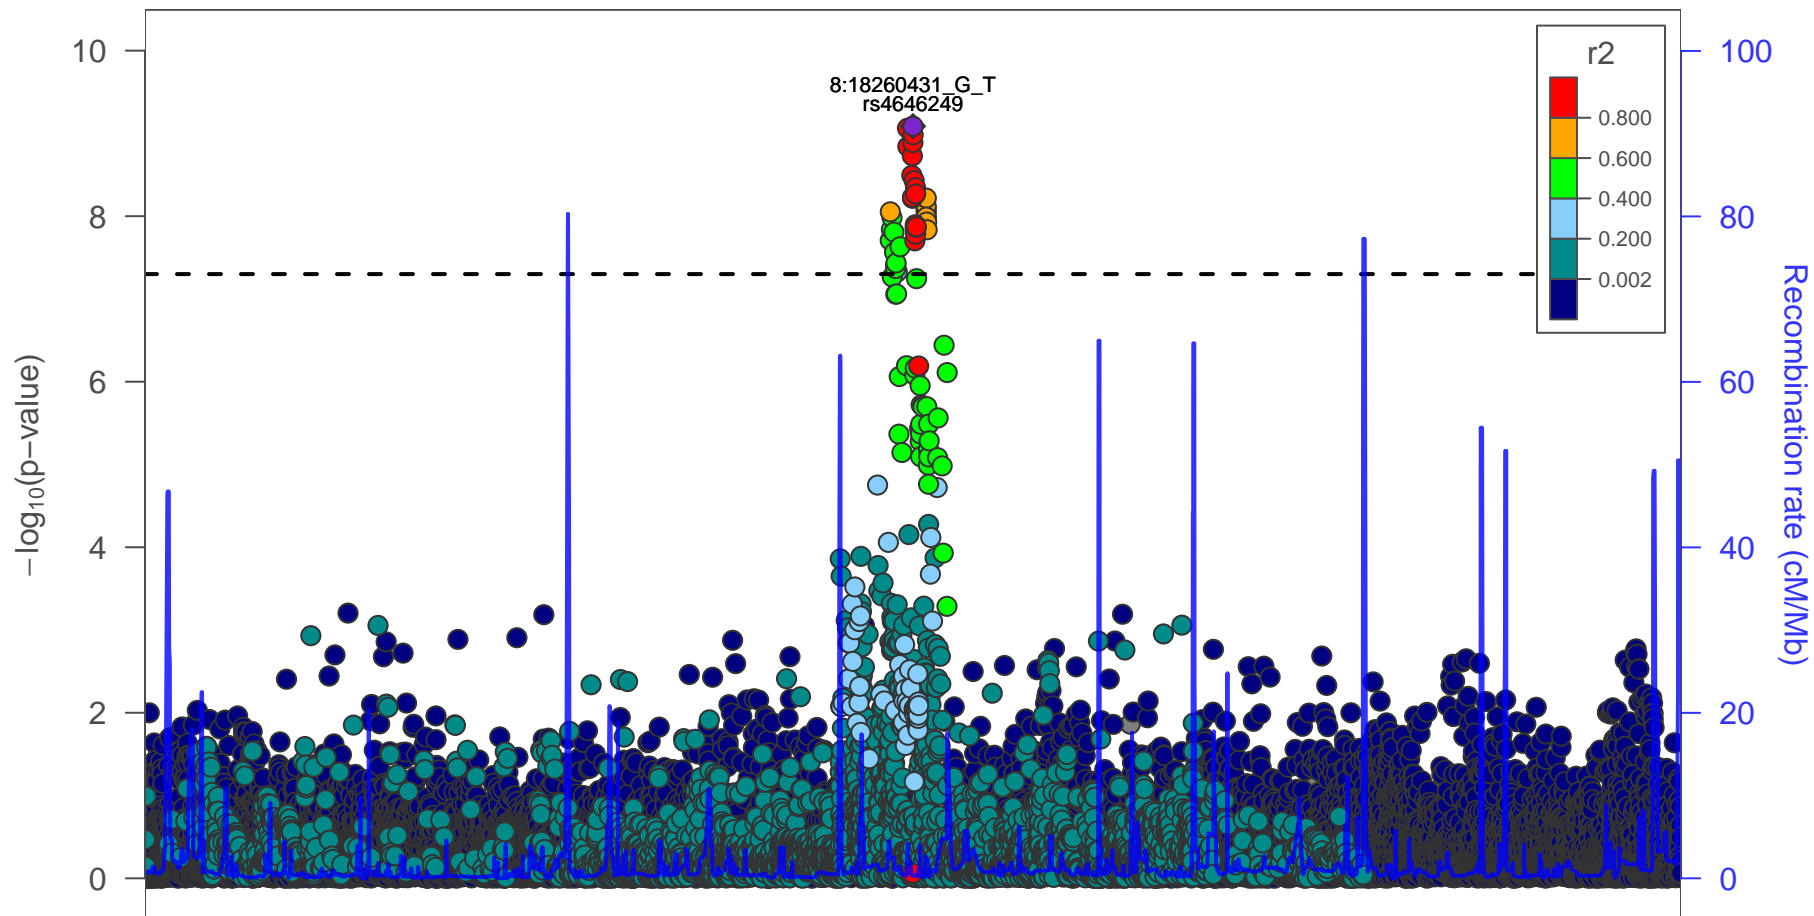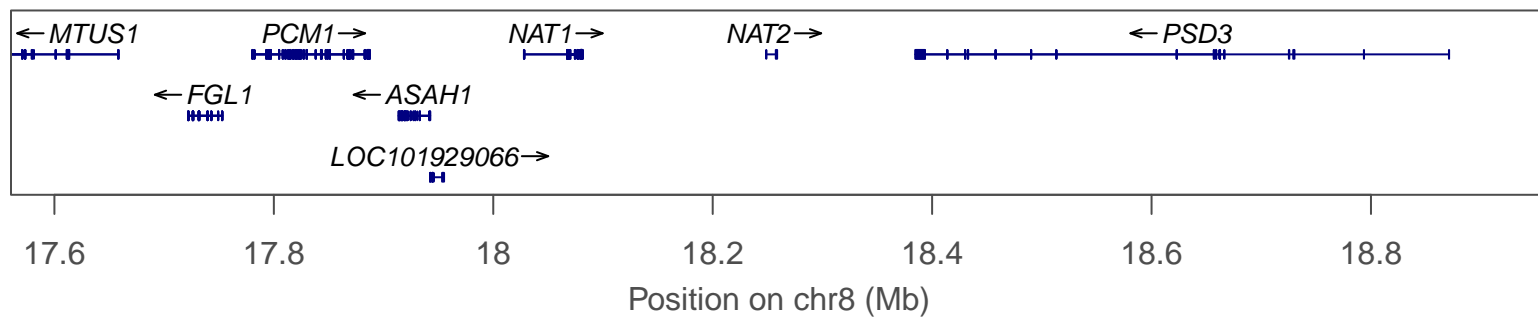

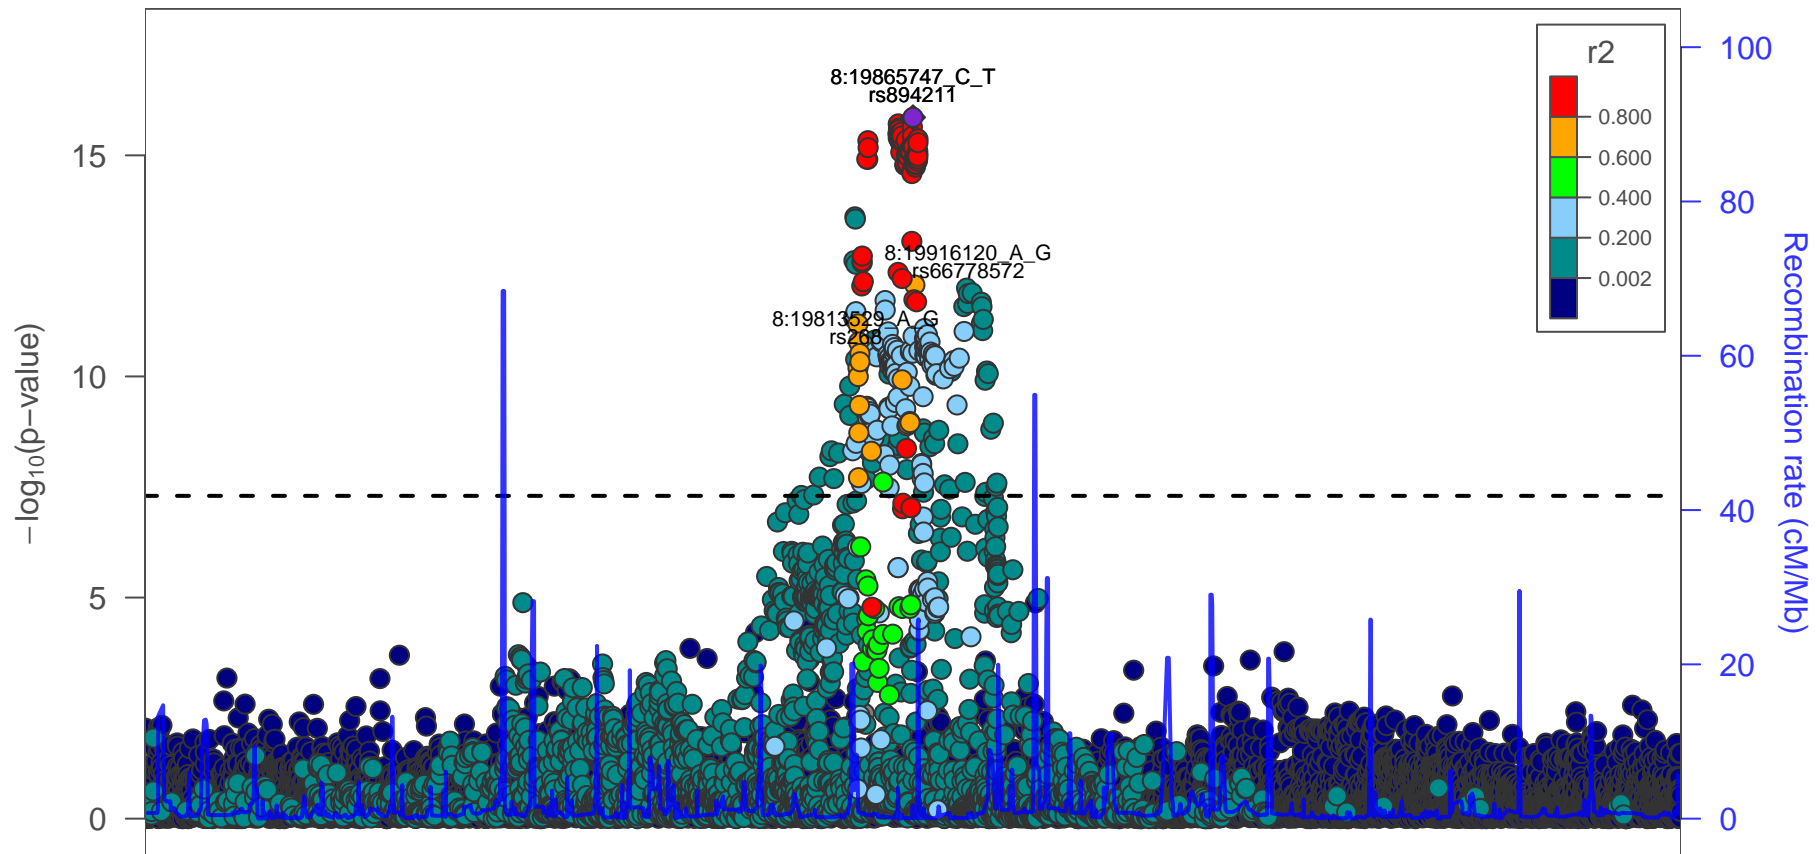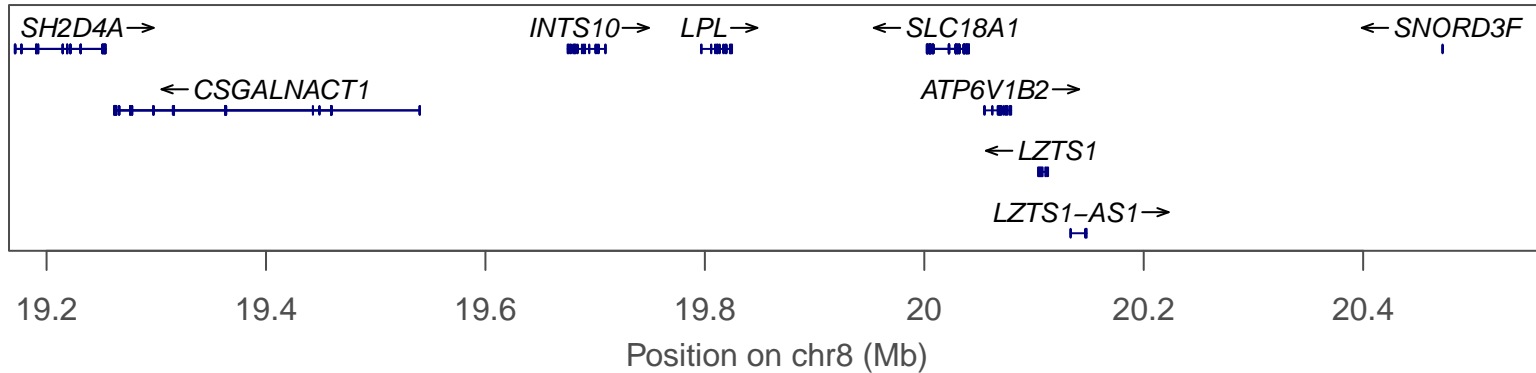

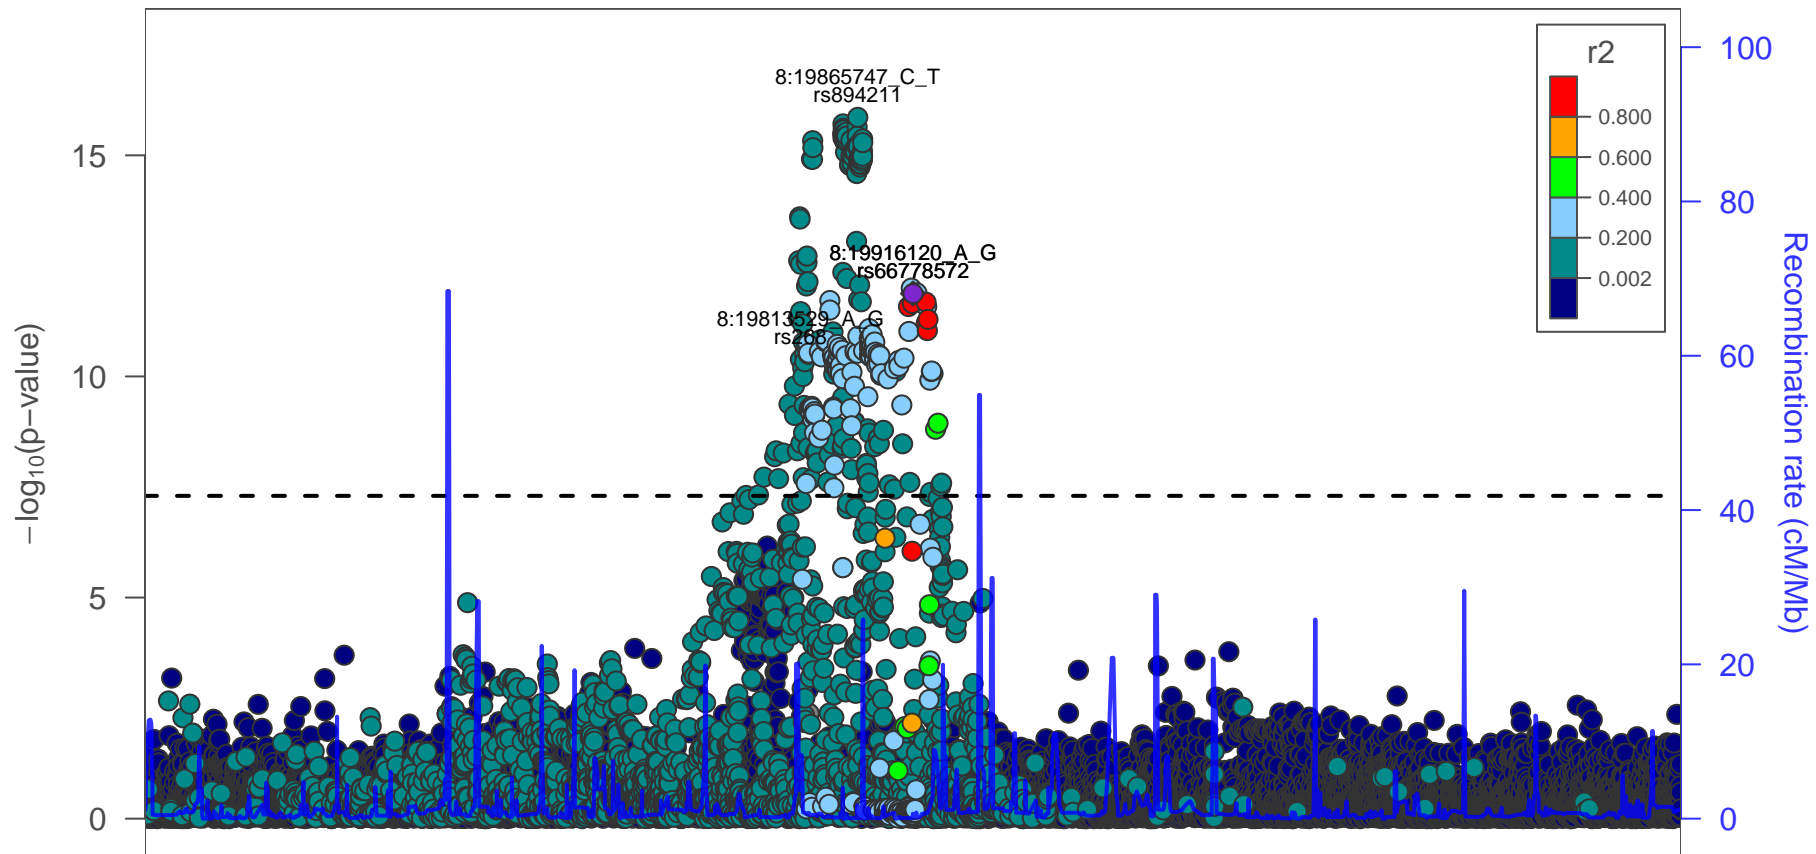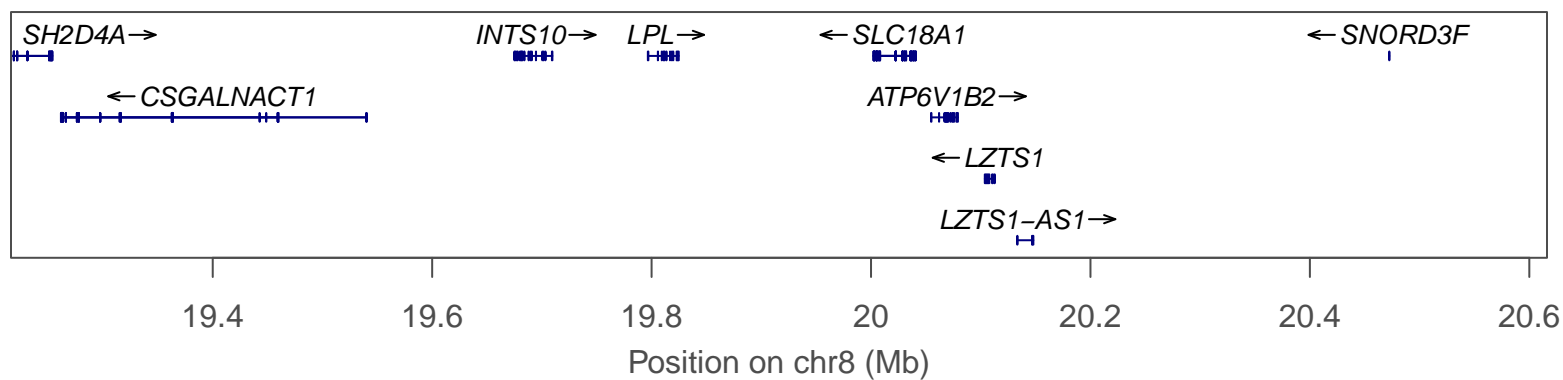



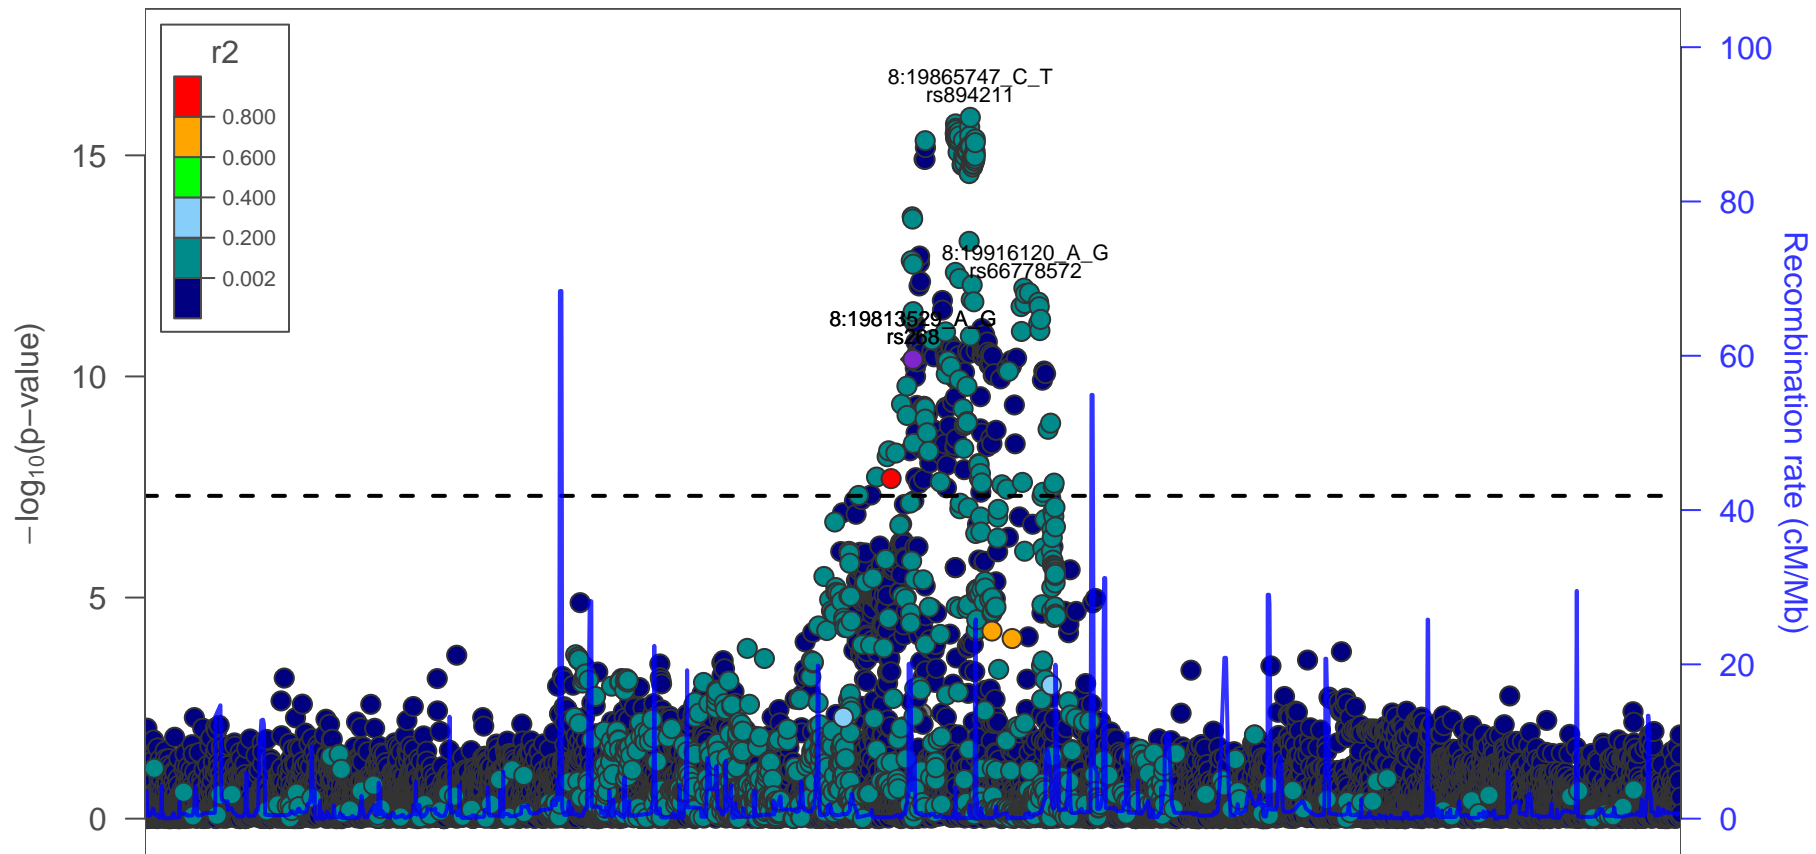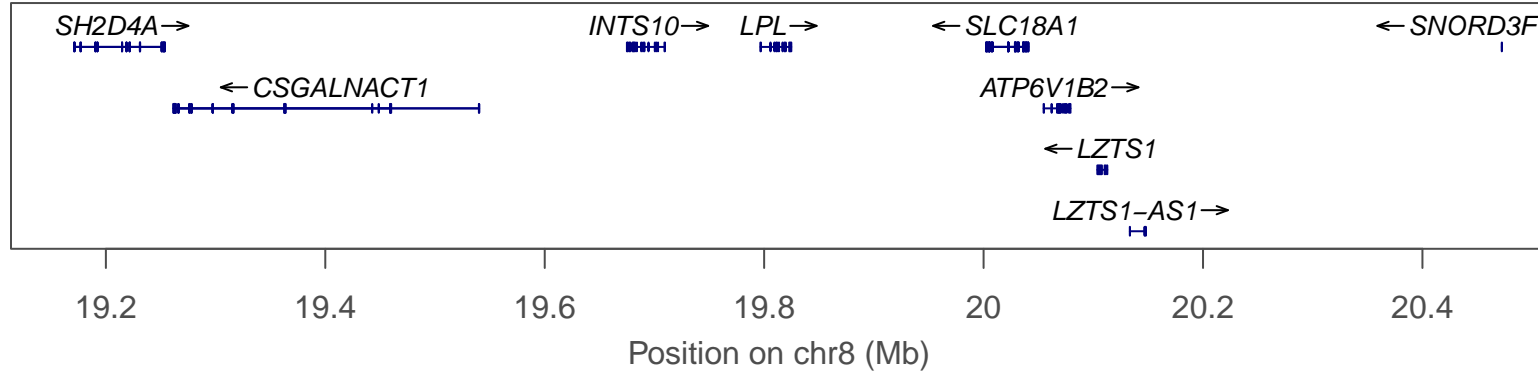

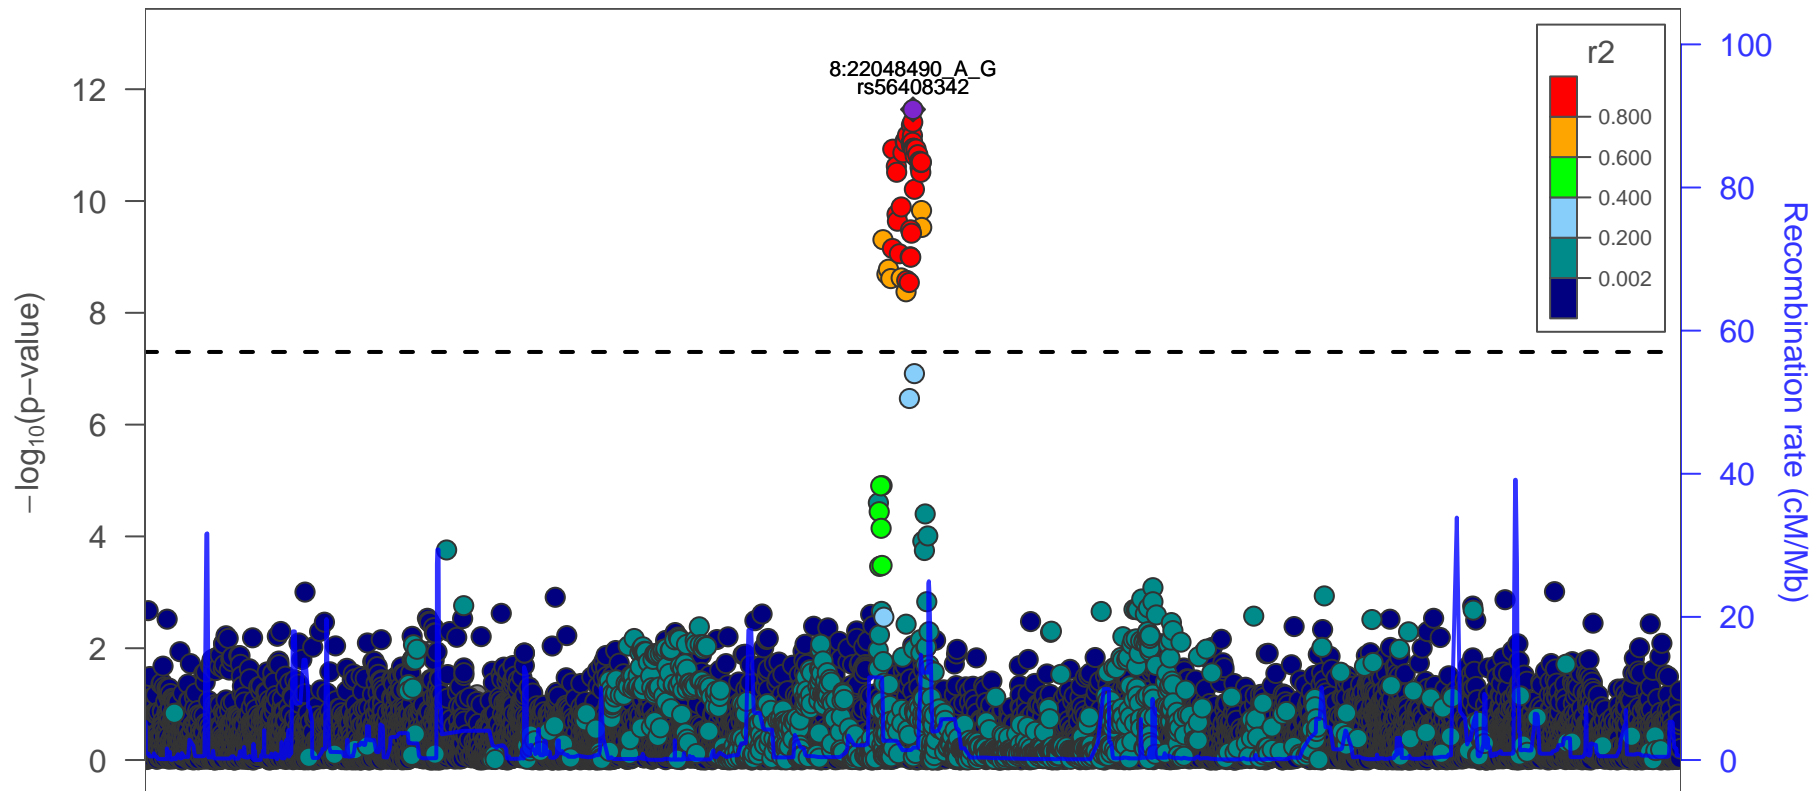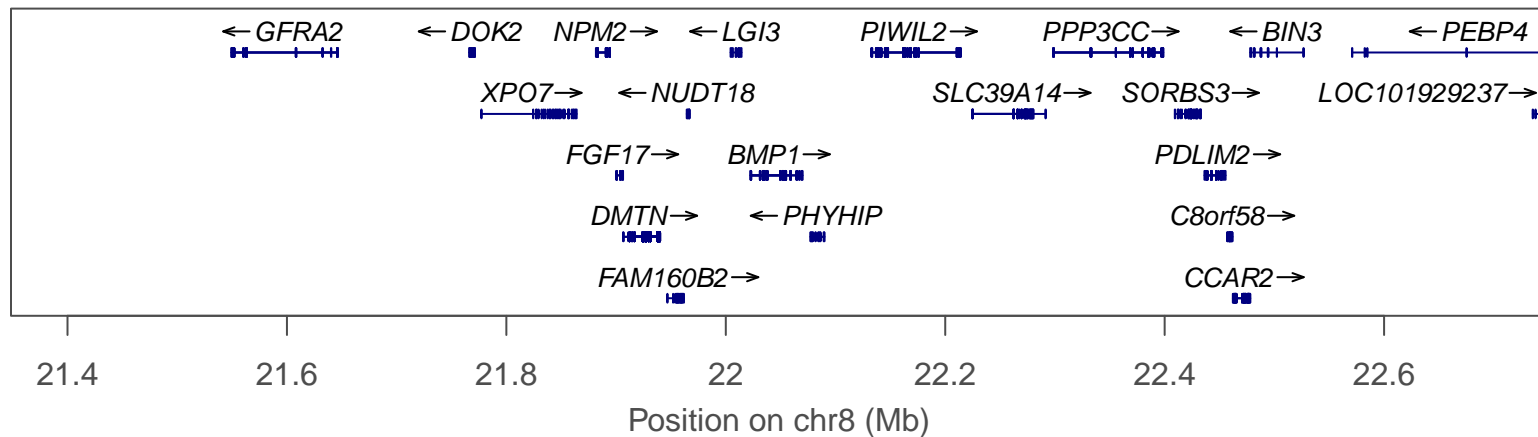

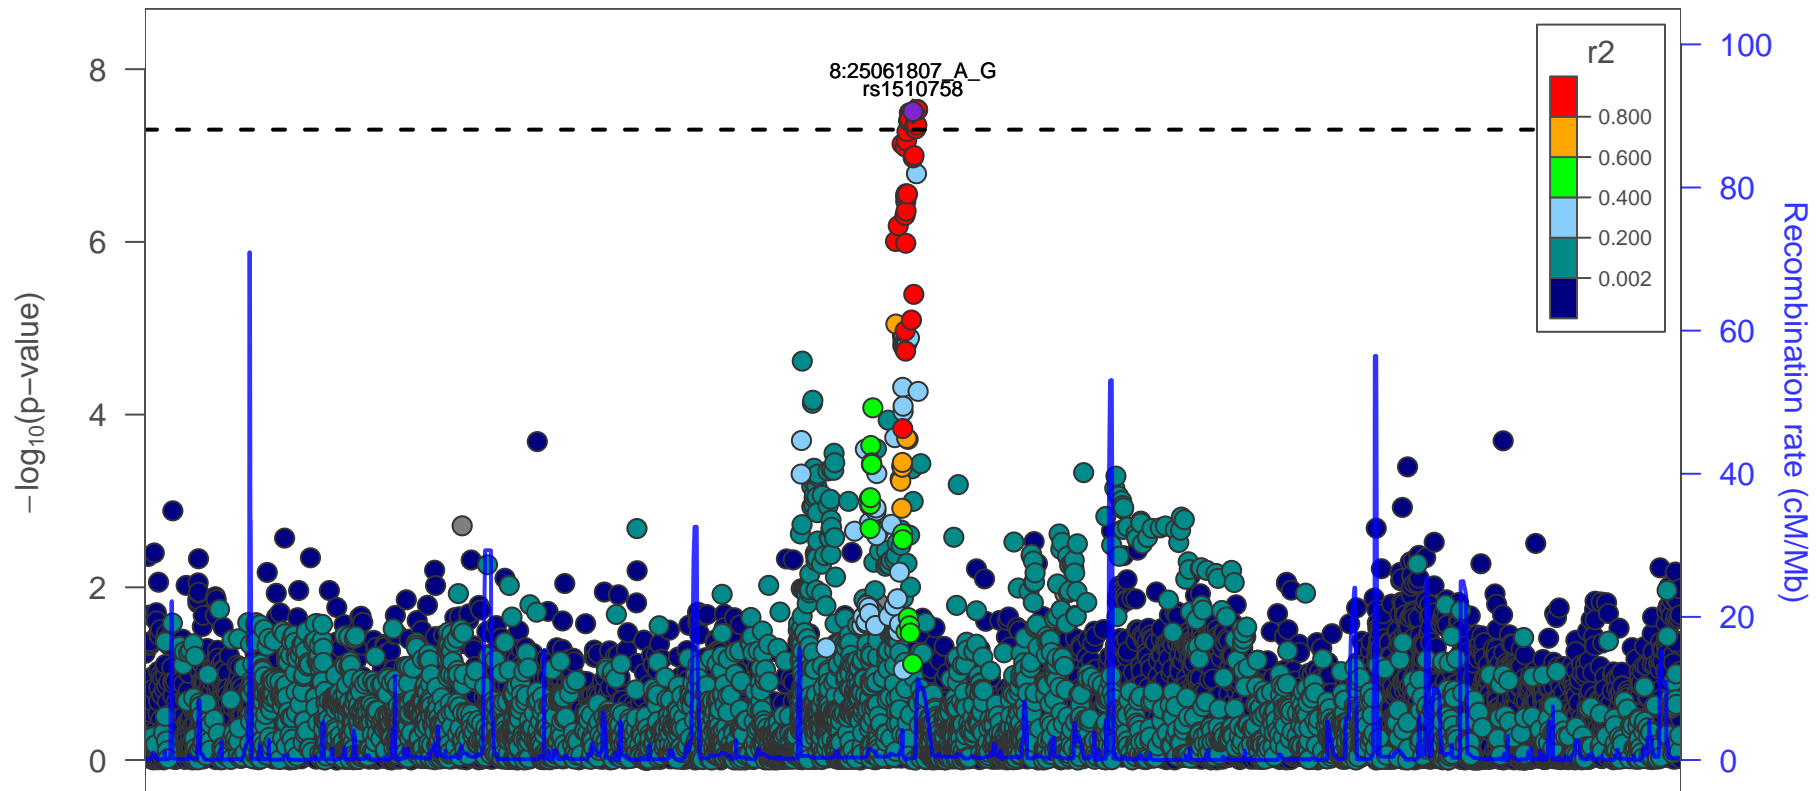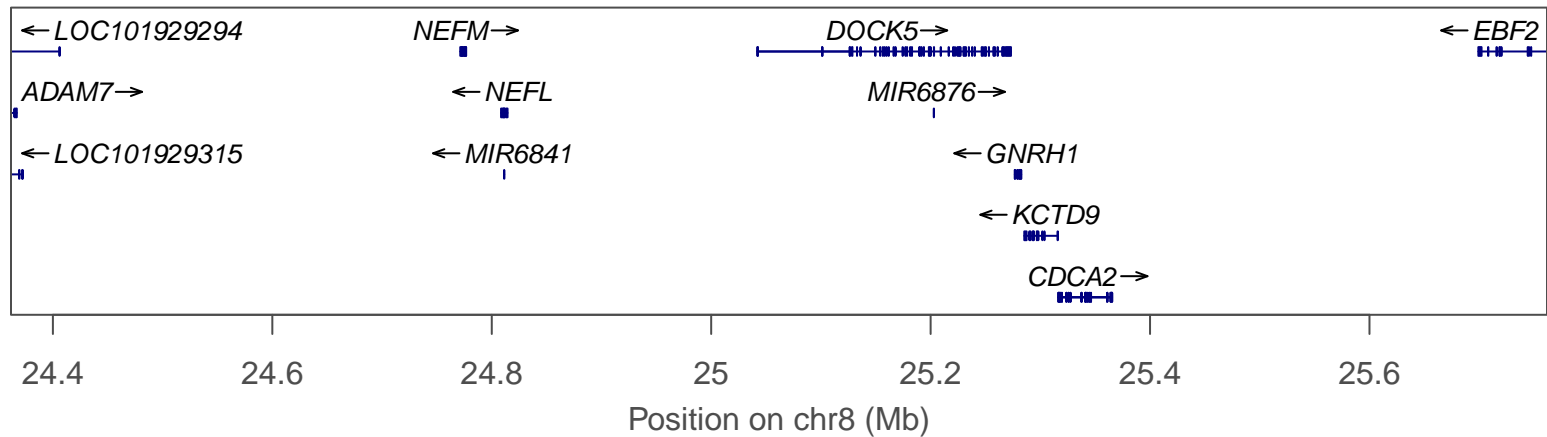

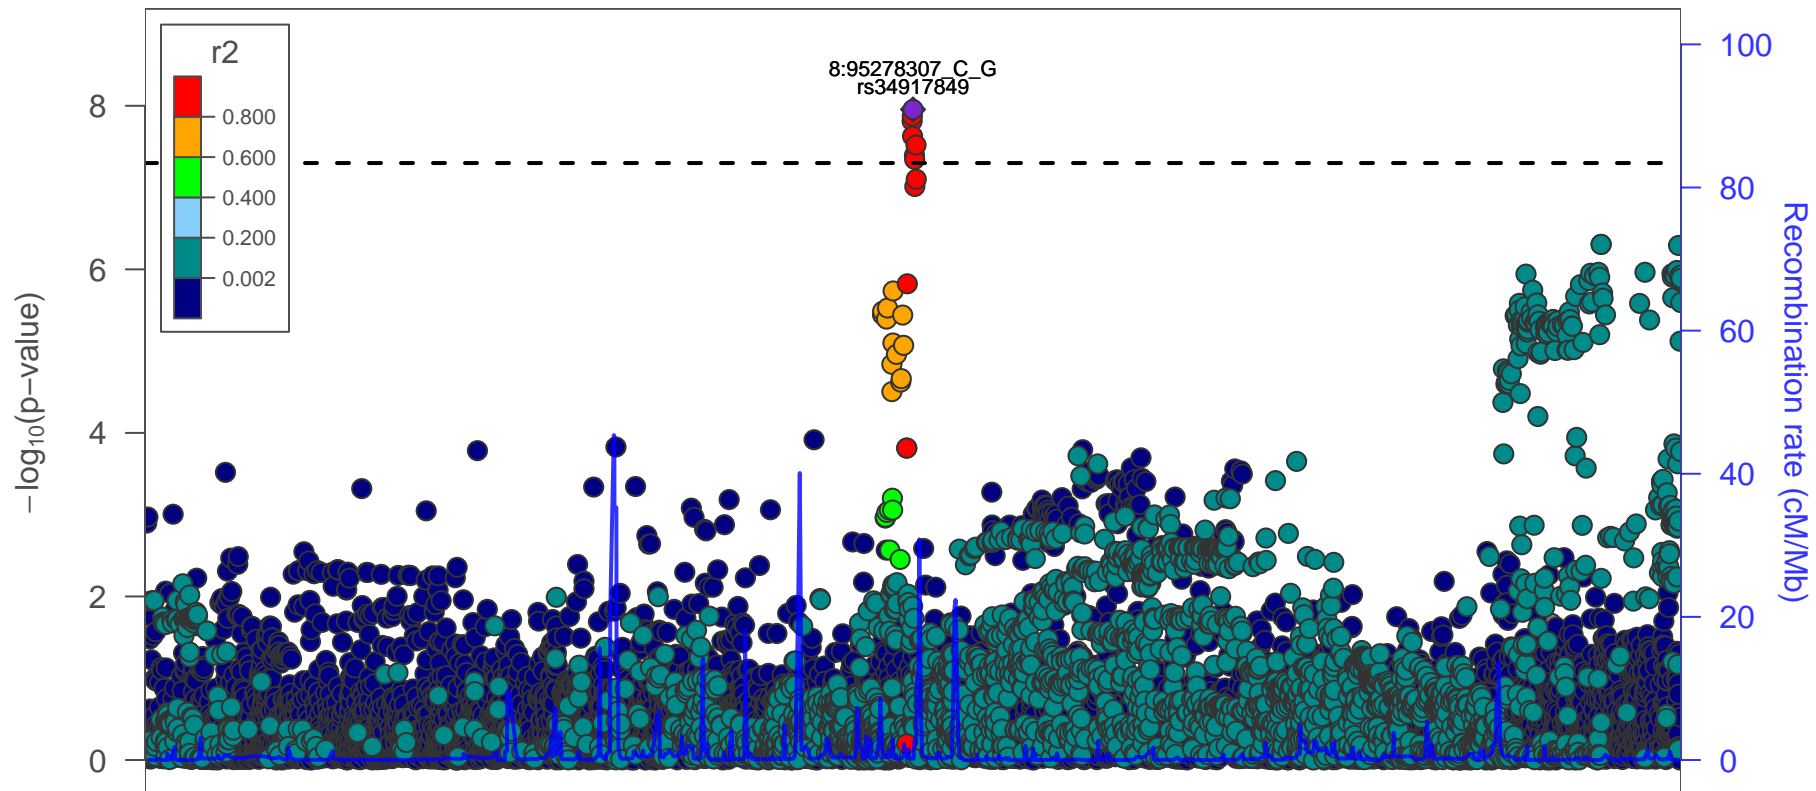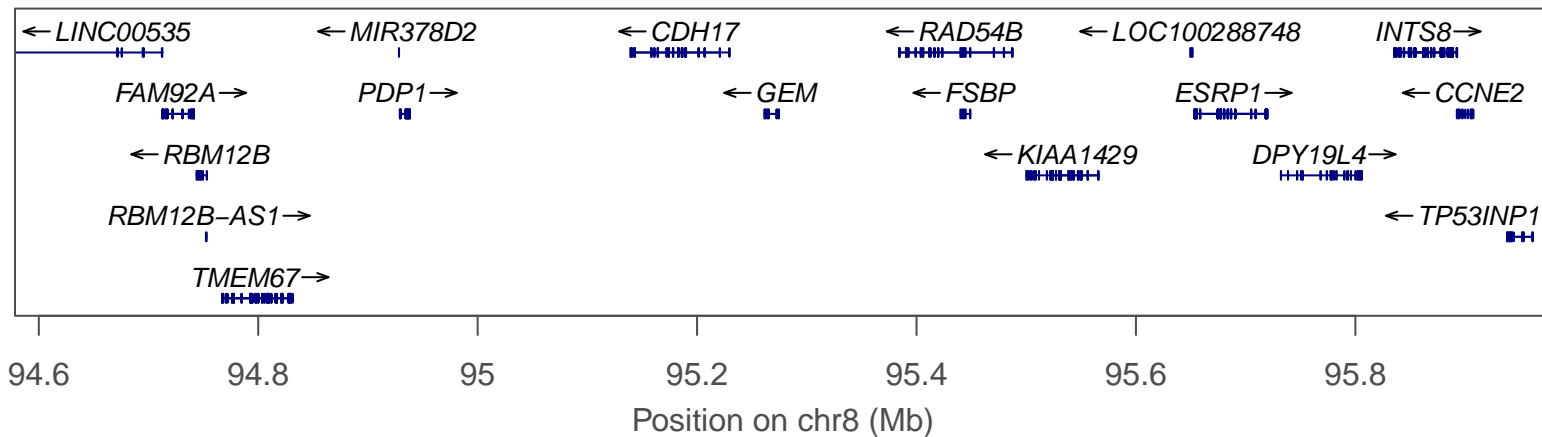

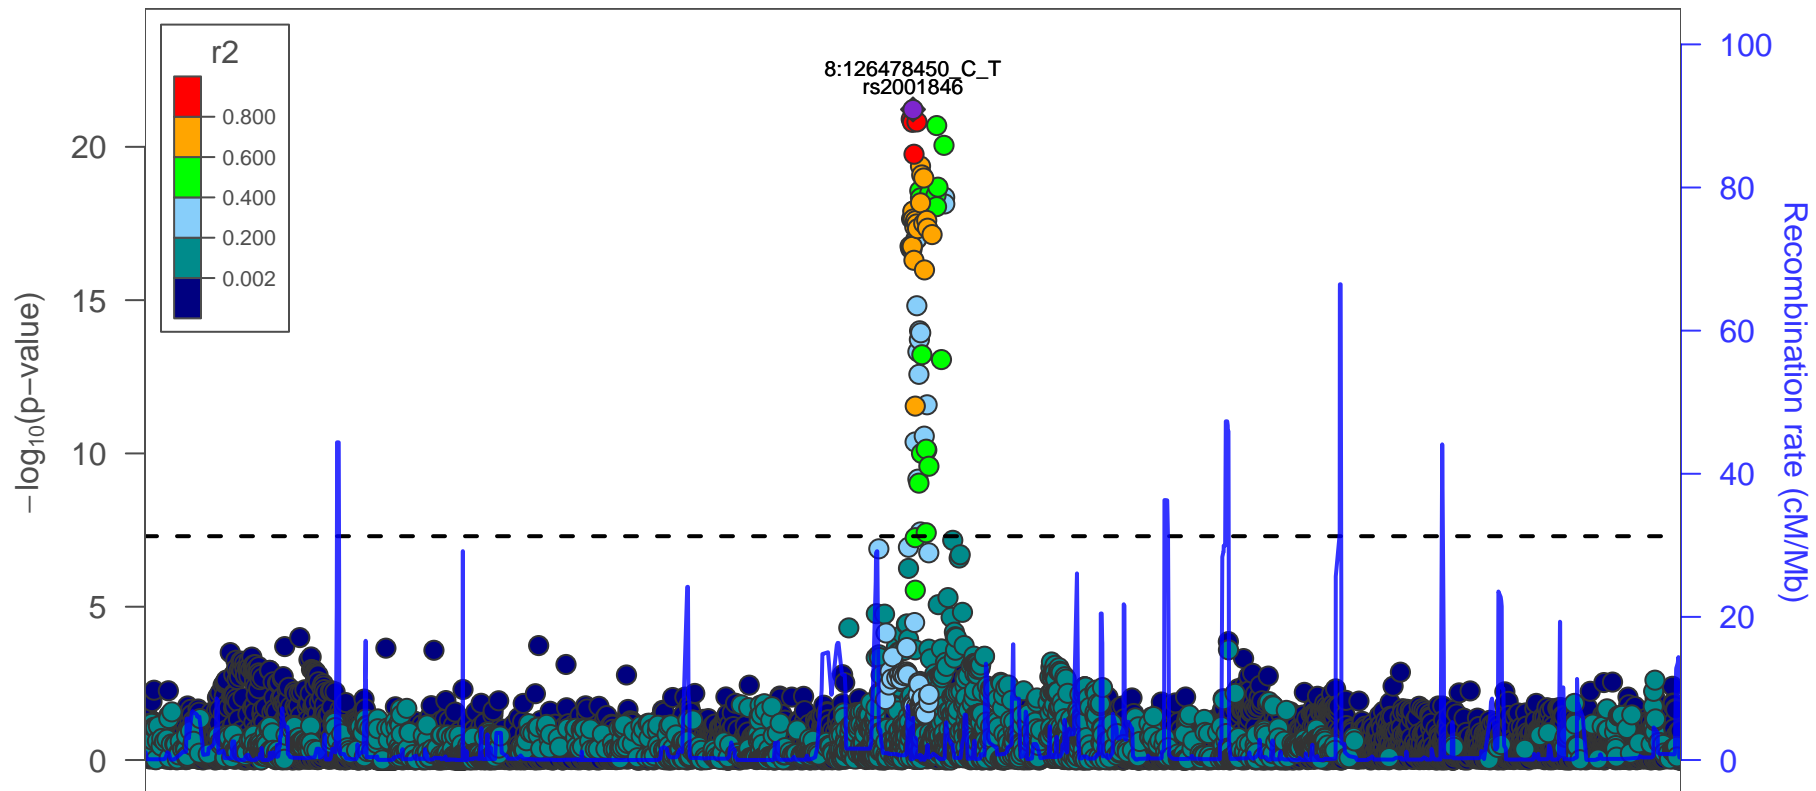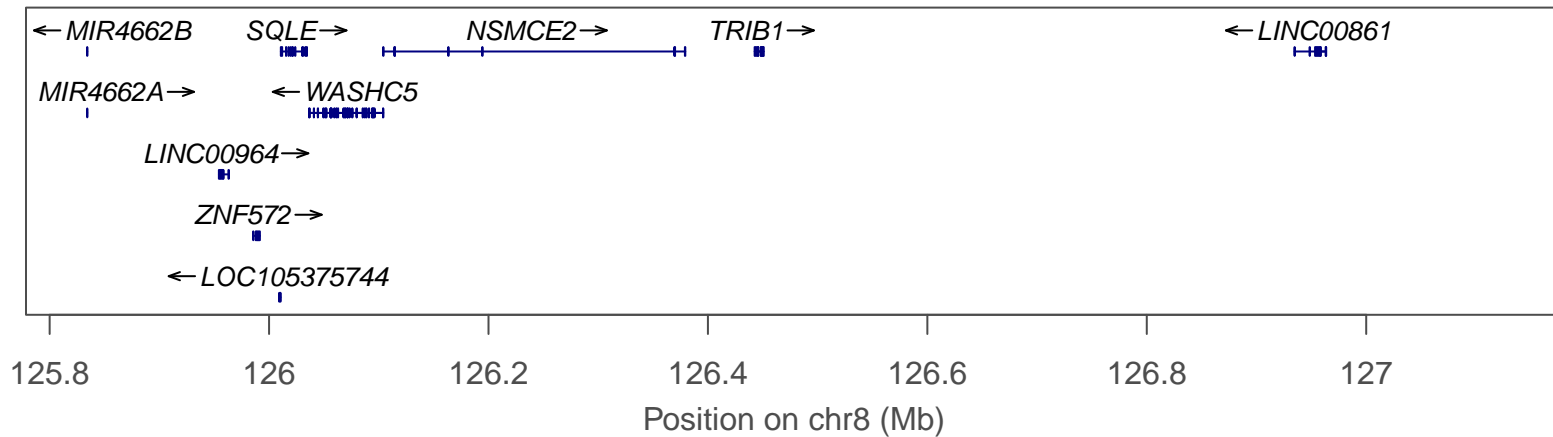

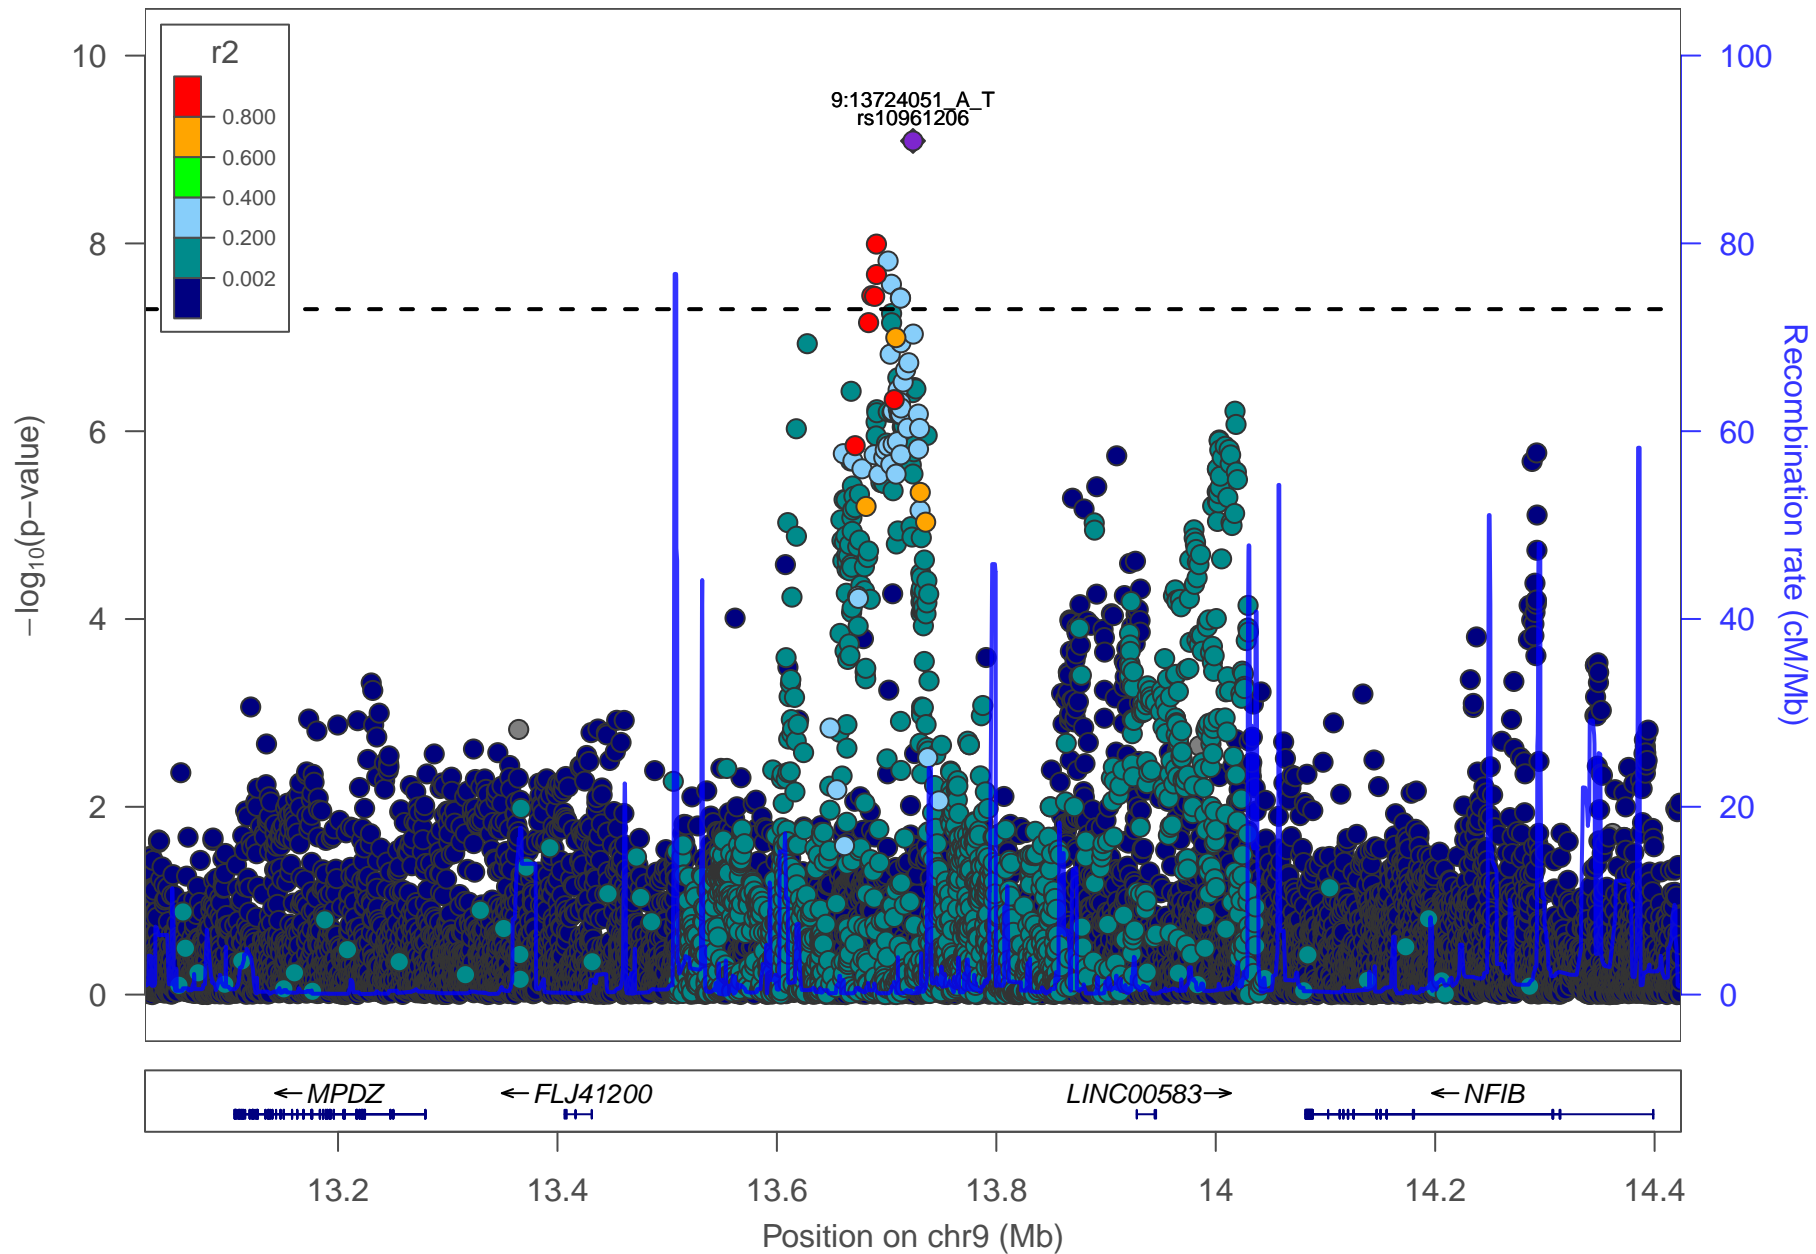

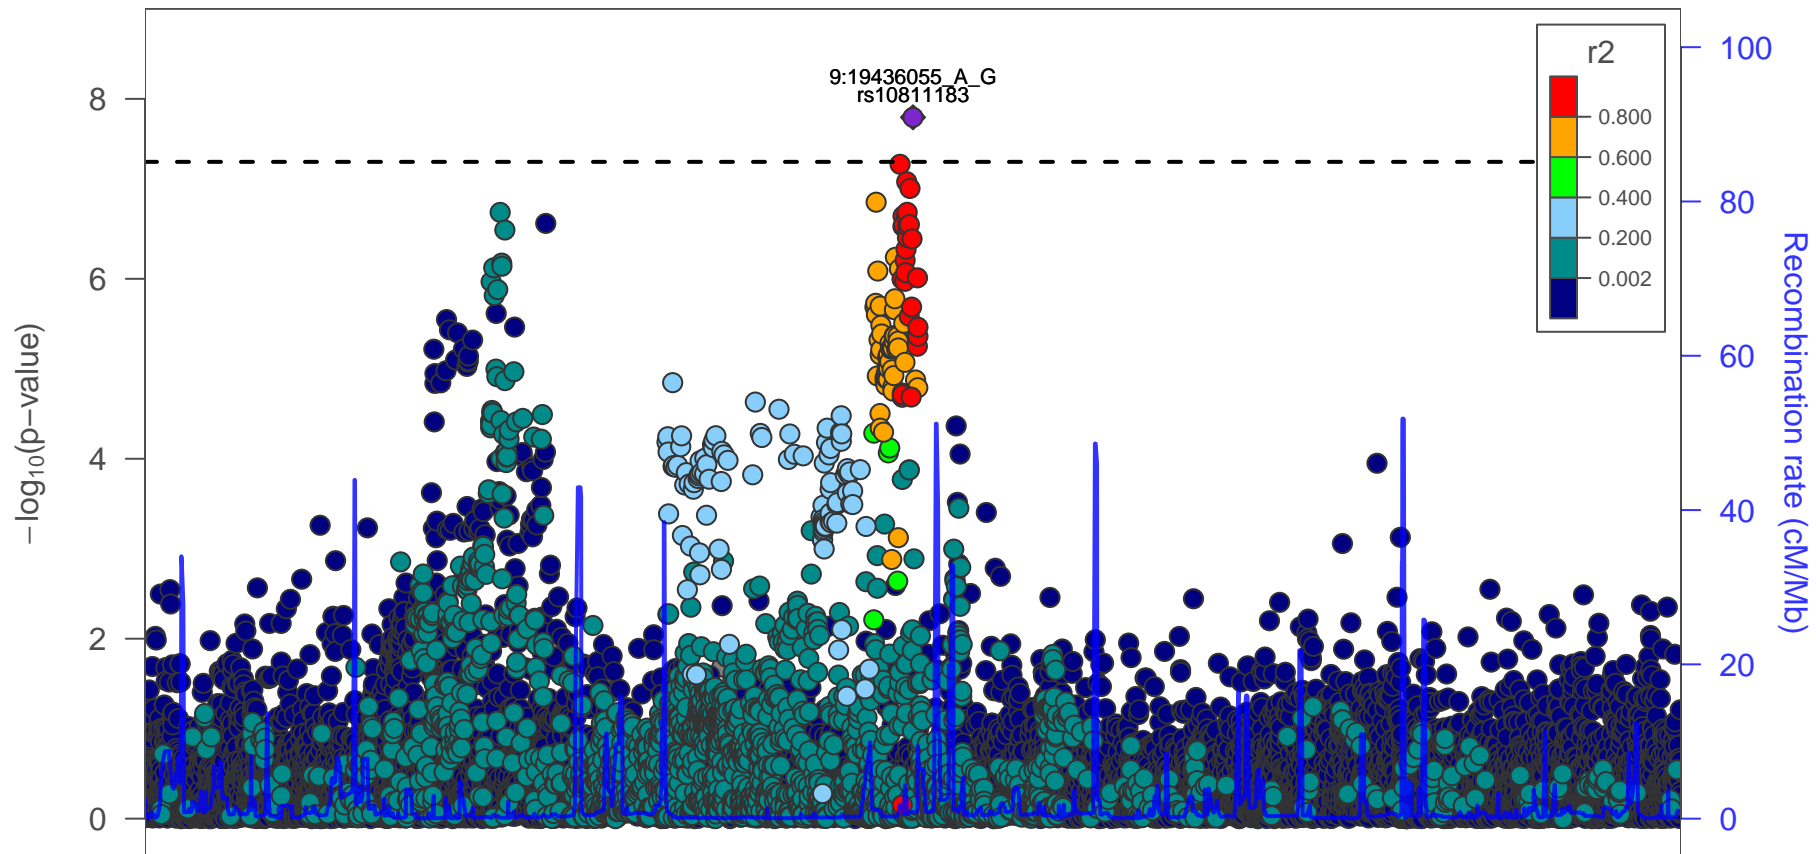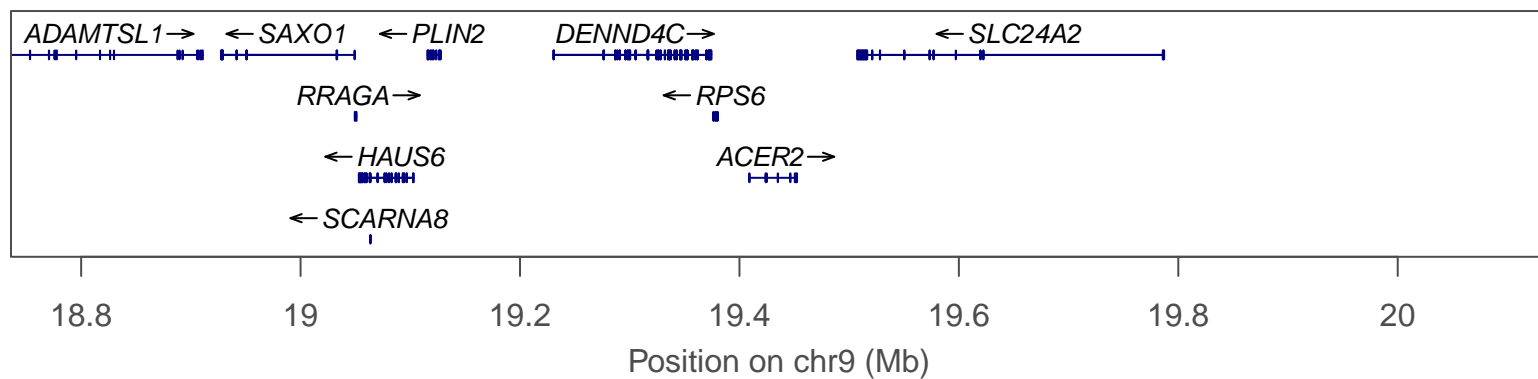

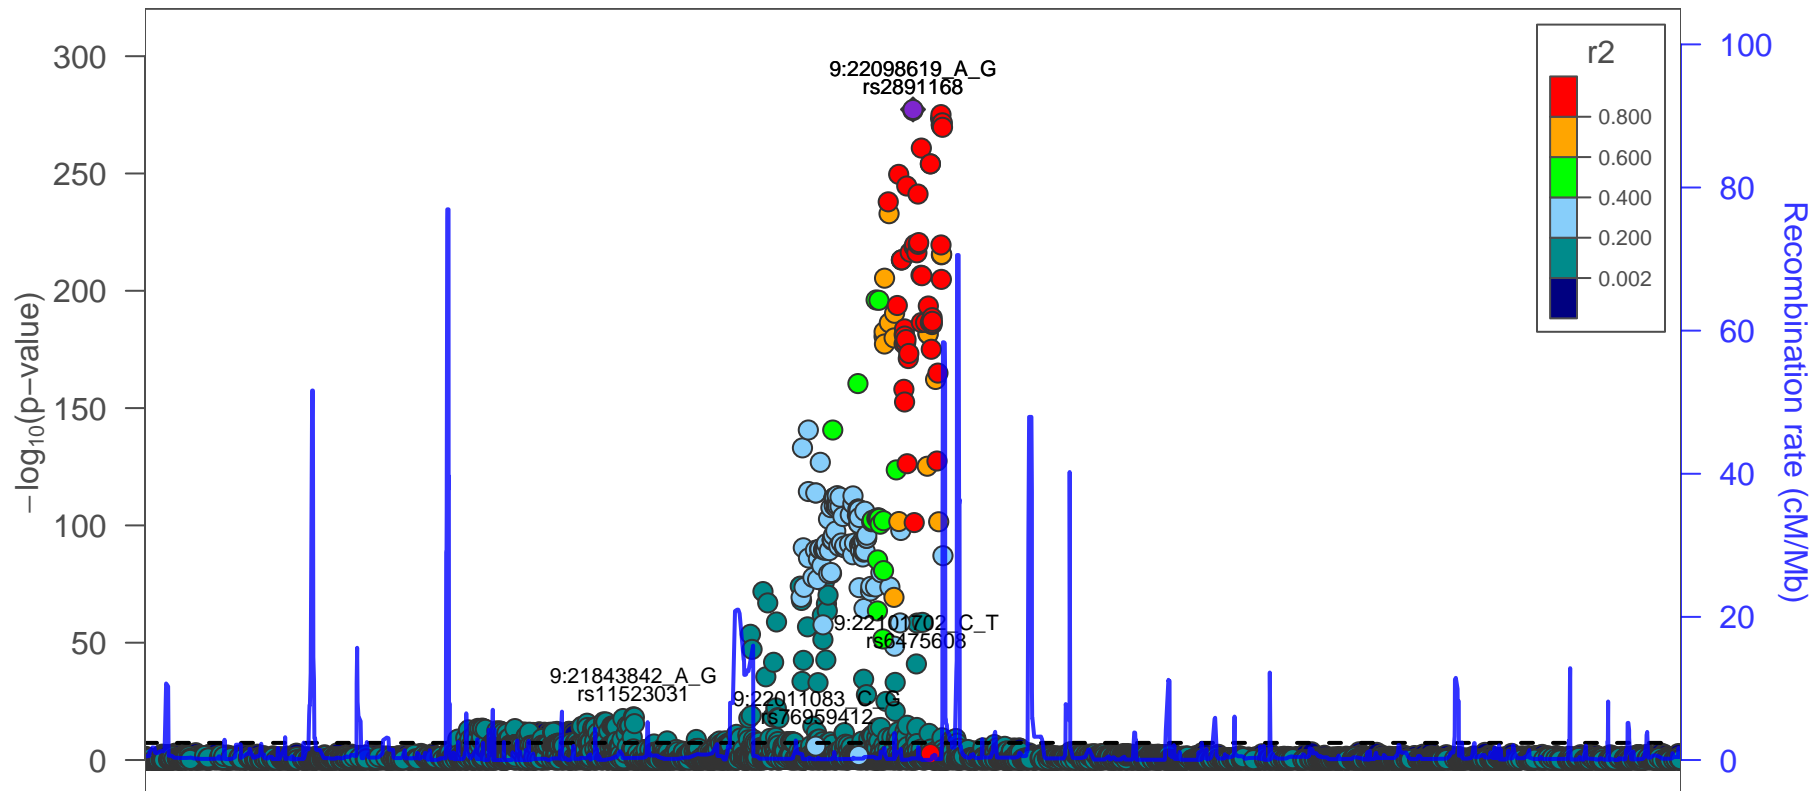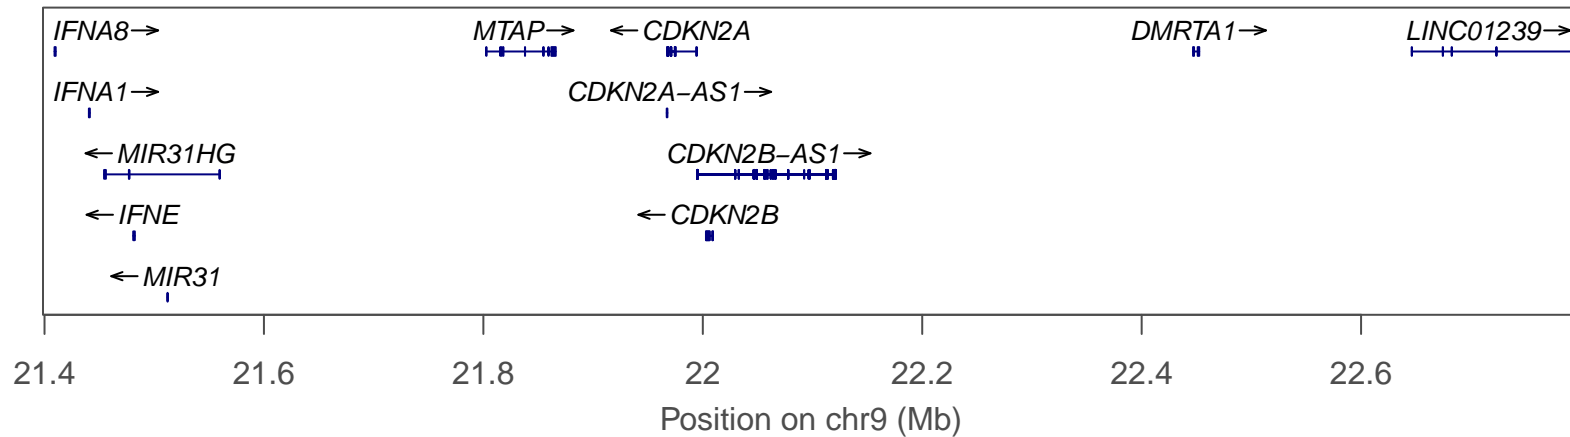



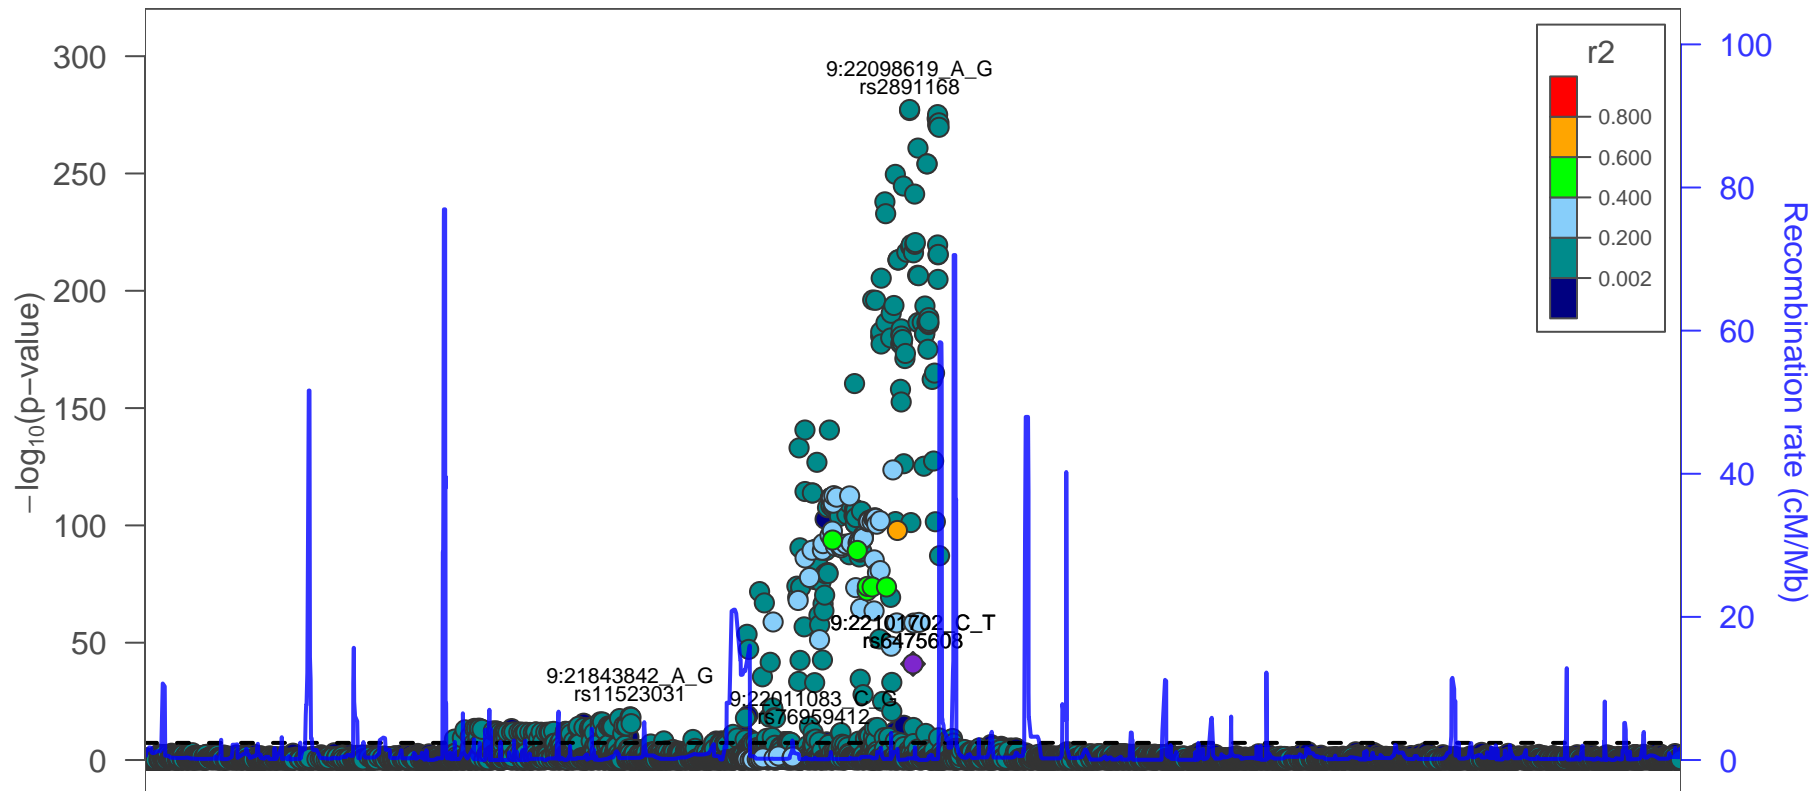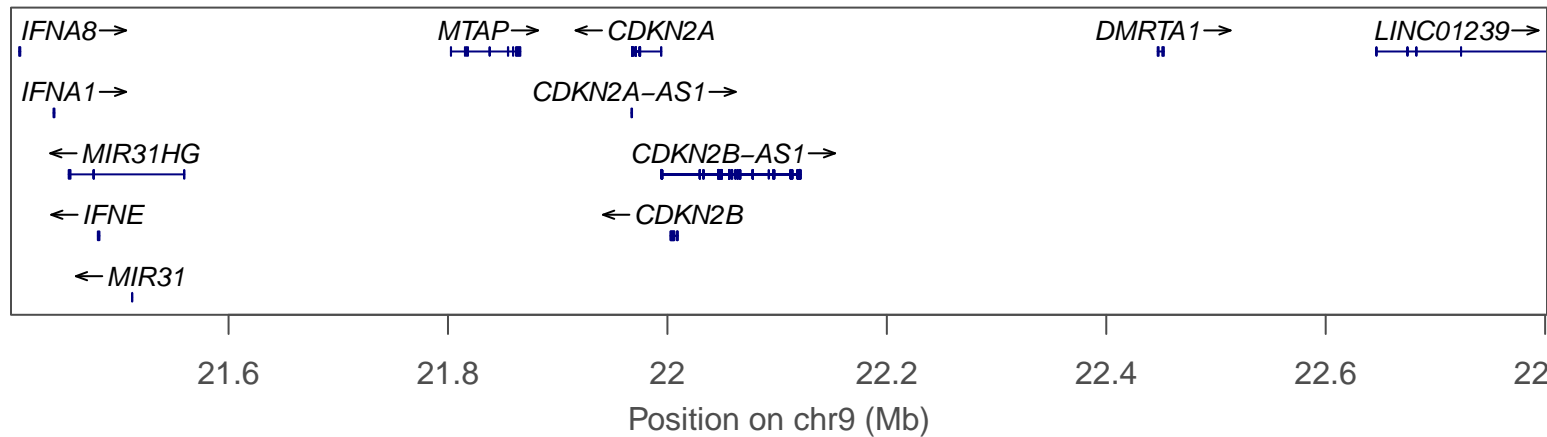

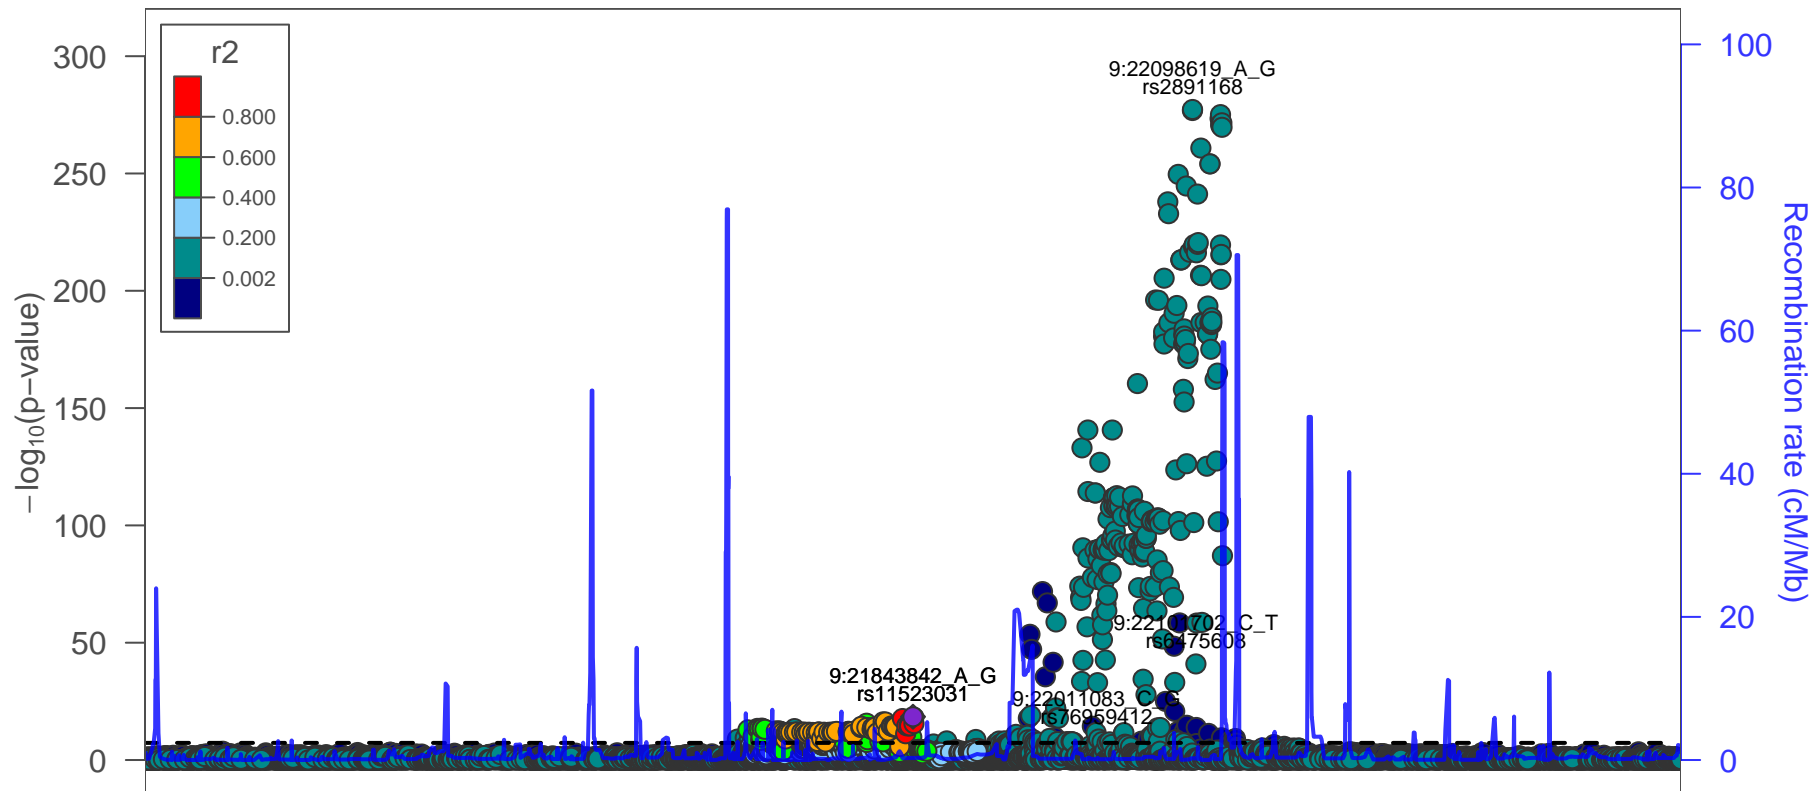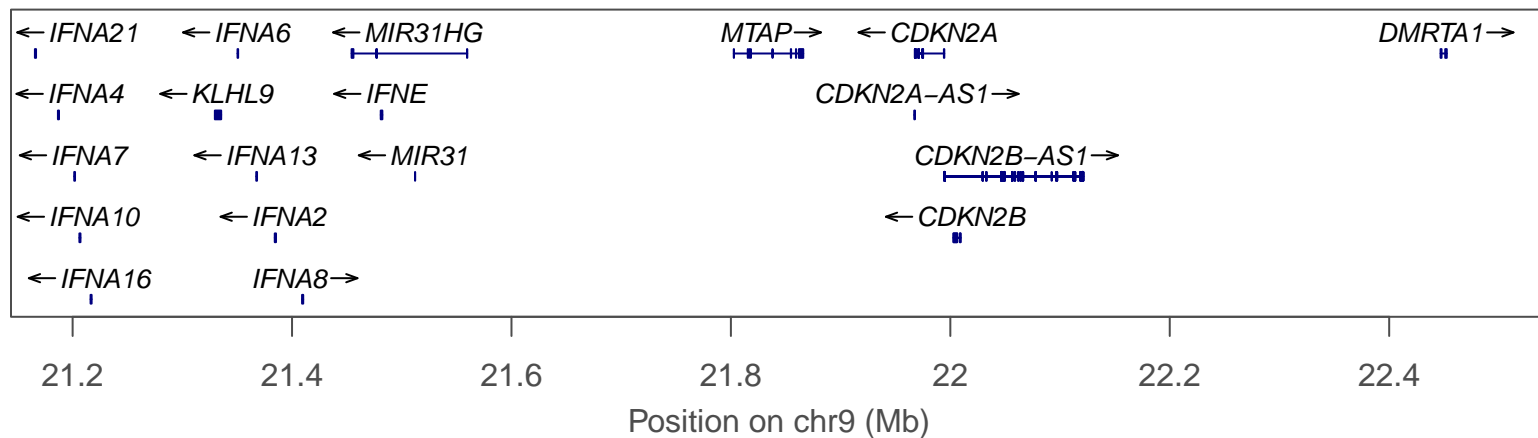

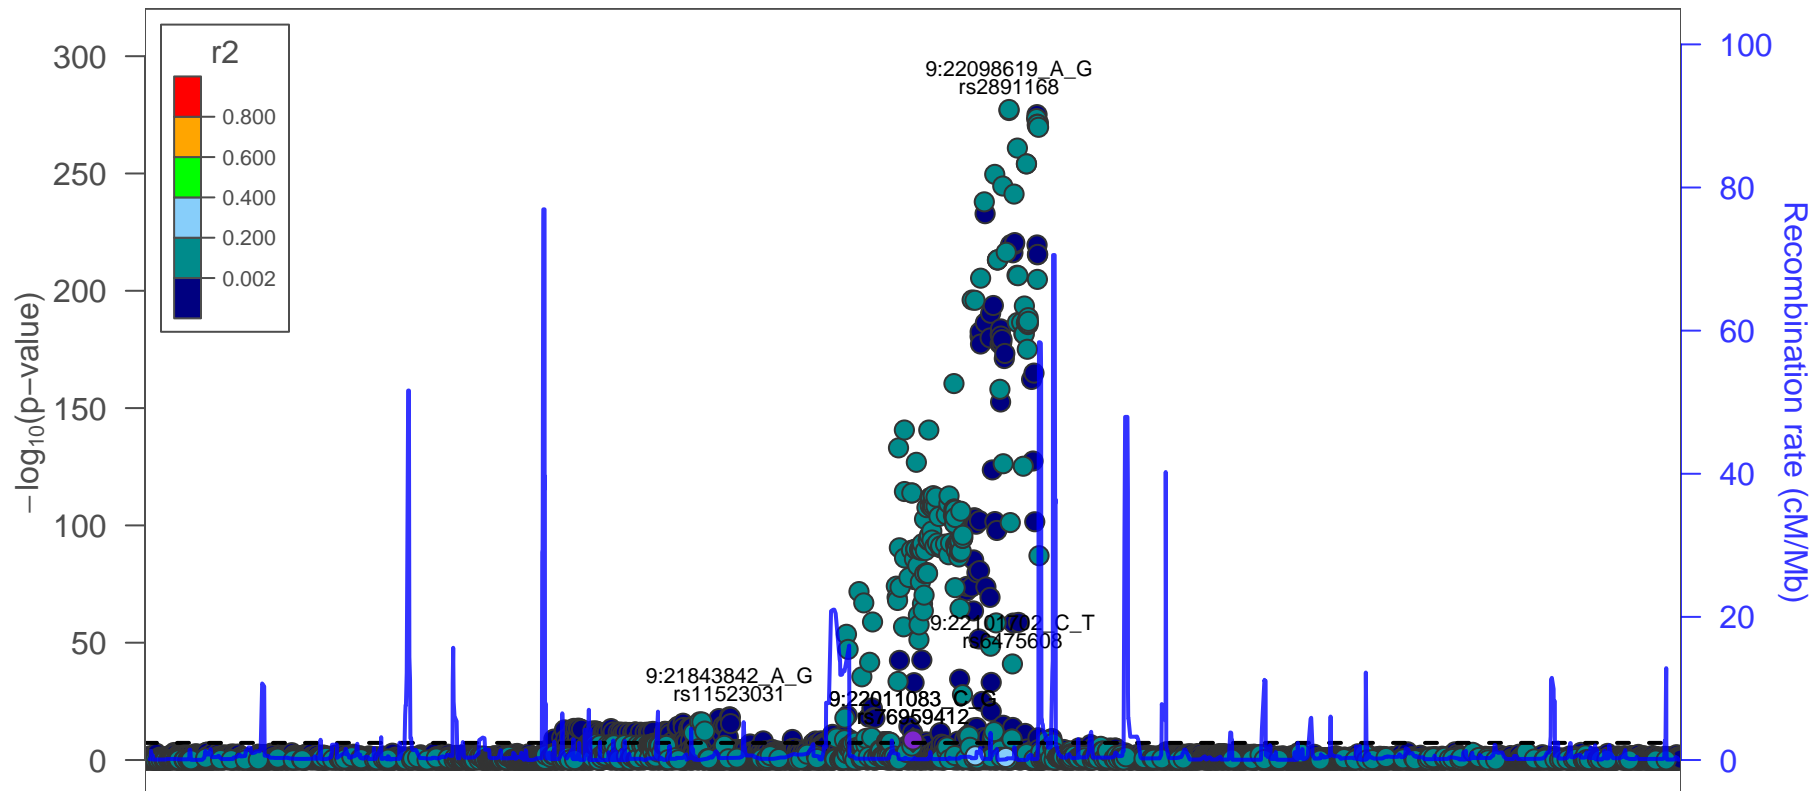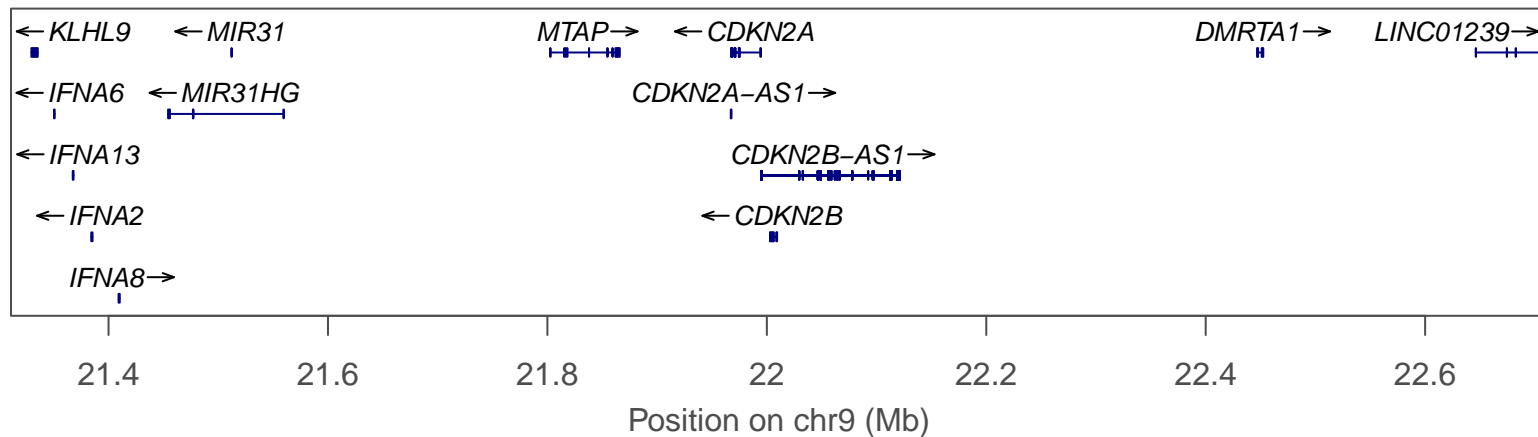

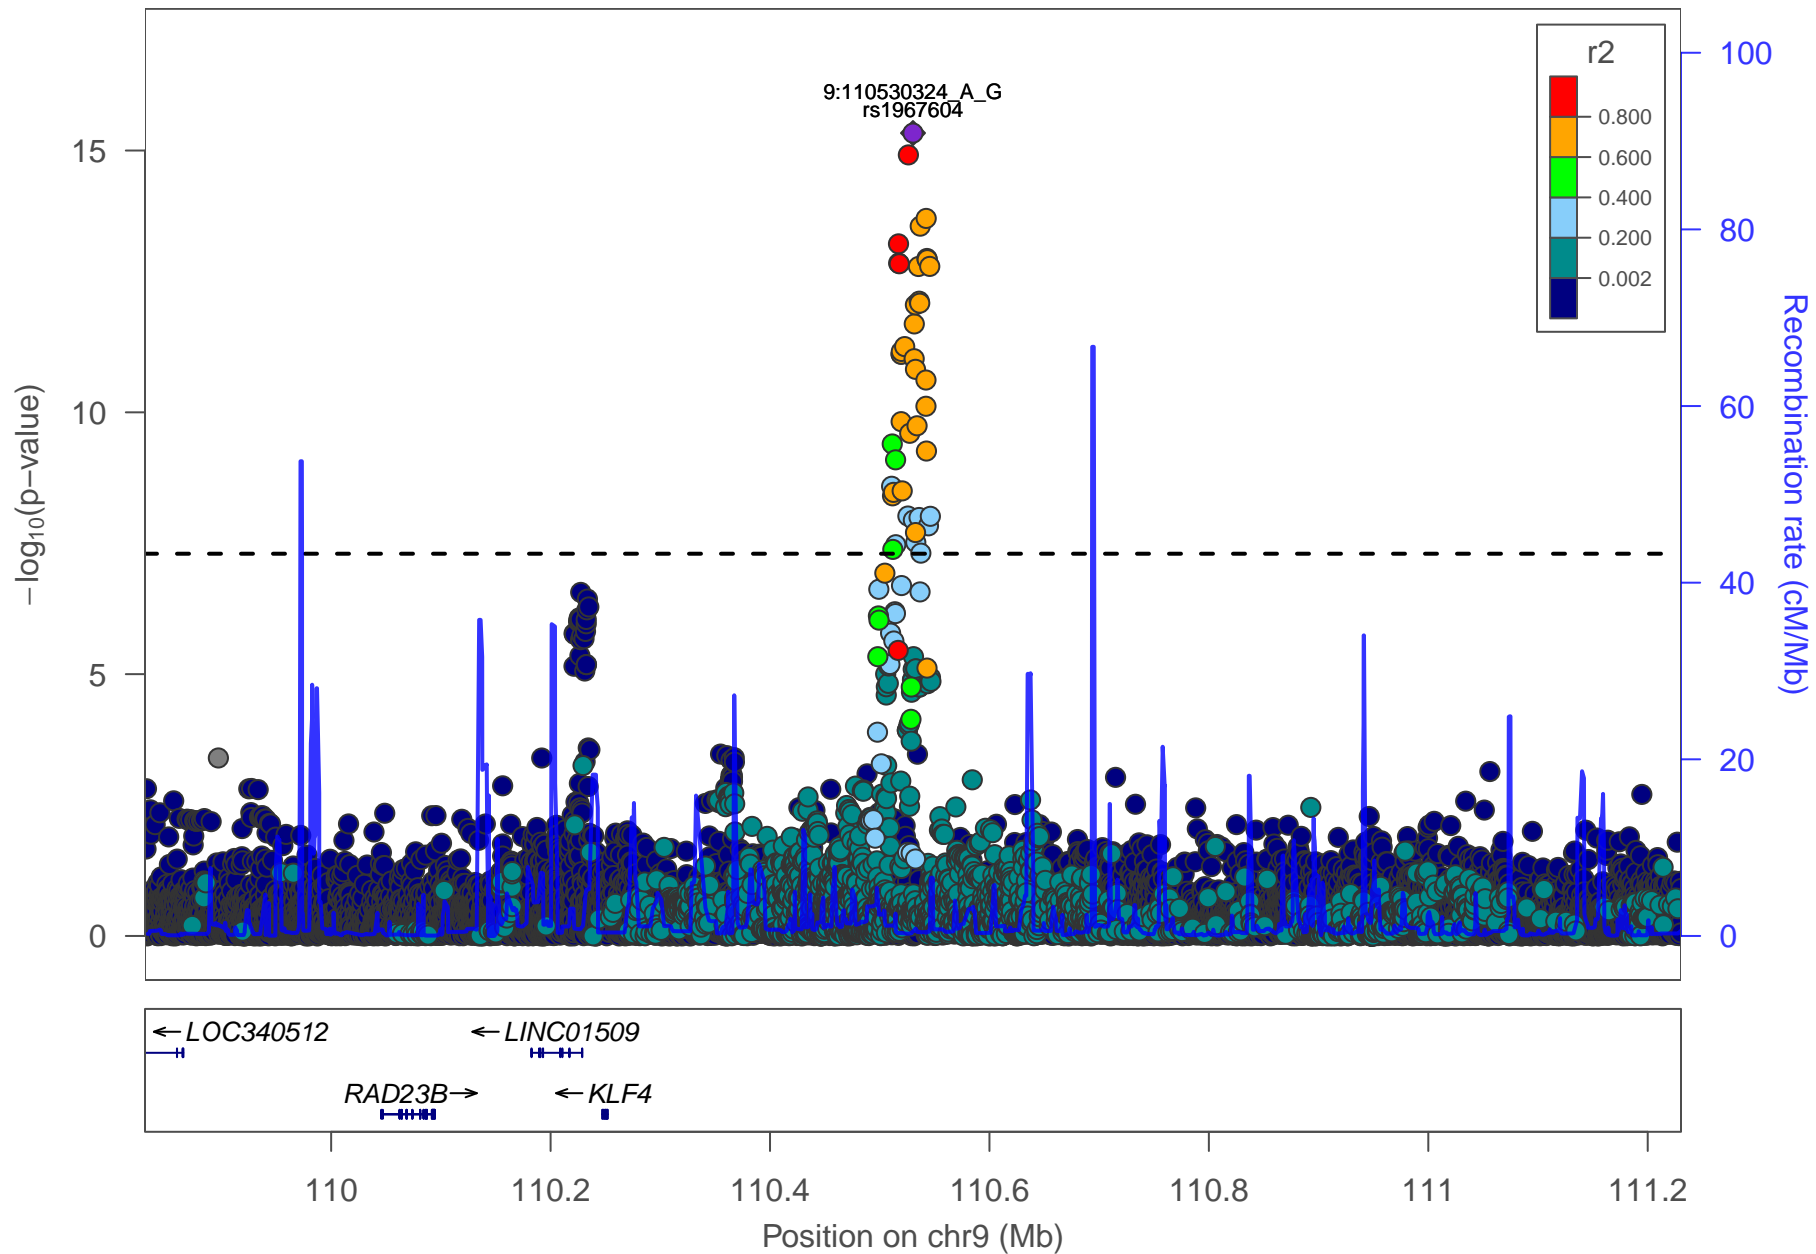

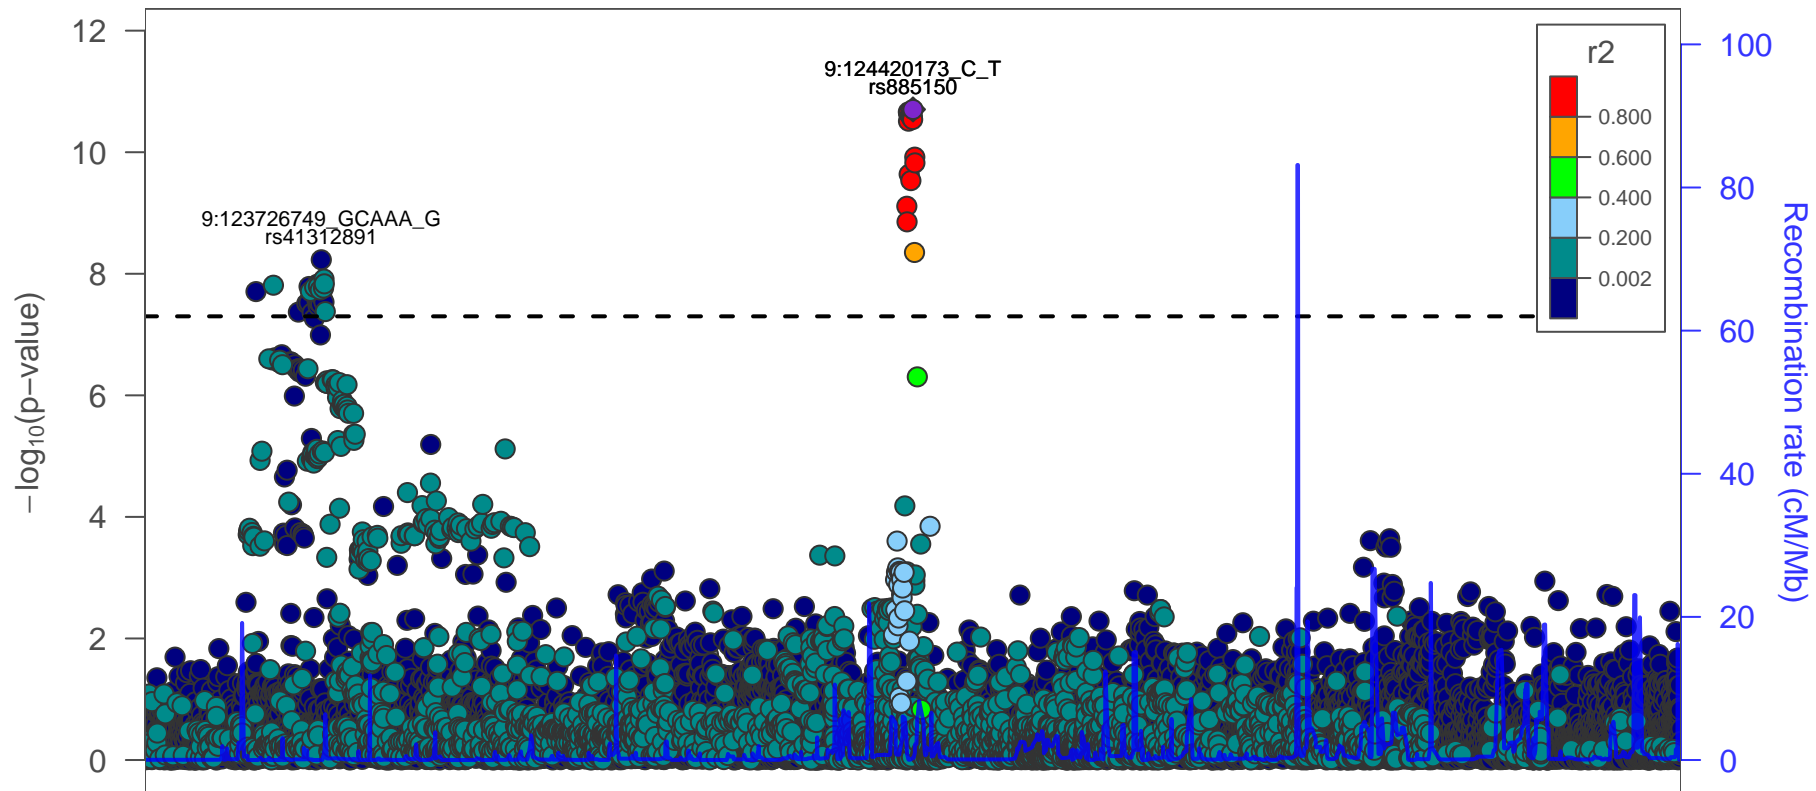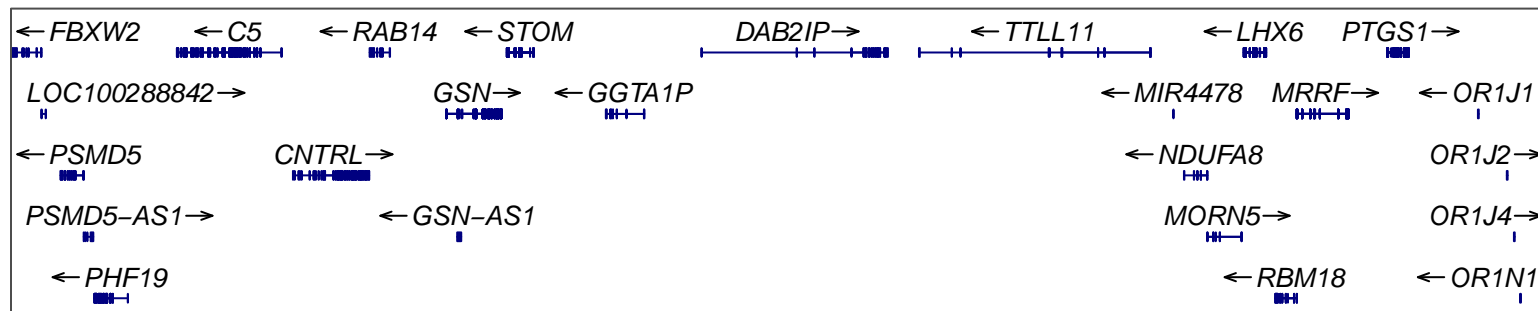

124

124.5

125

Position on chr9 (Mb)

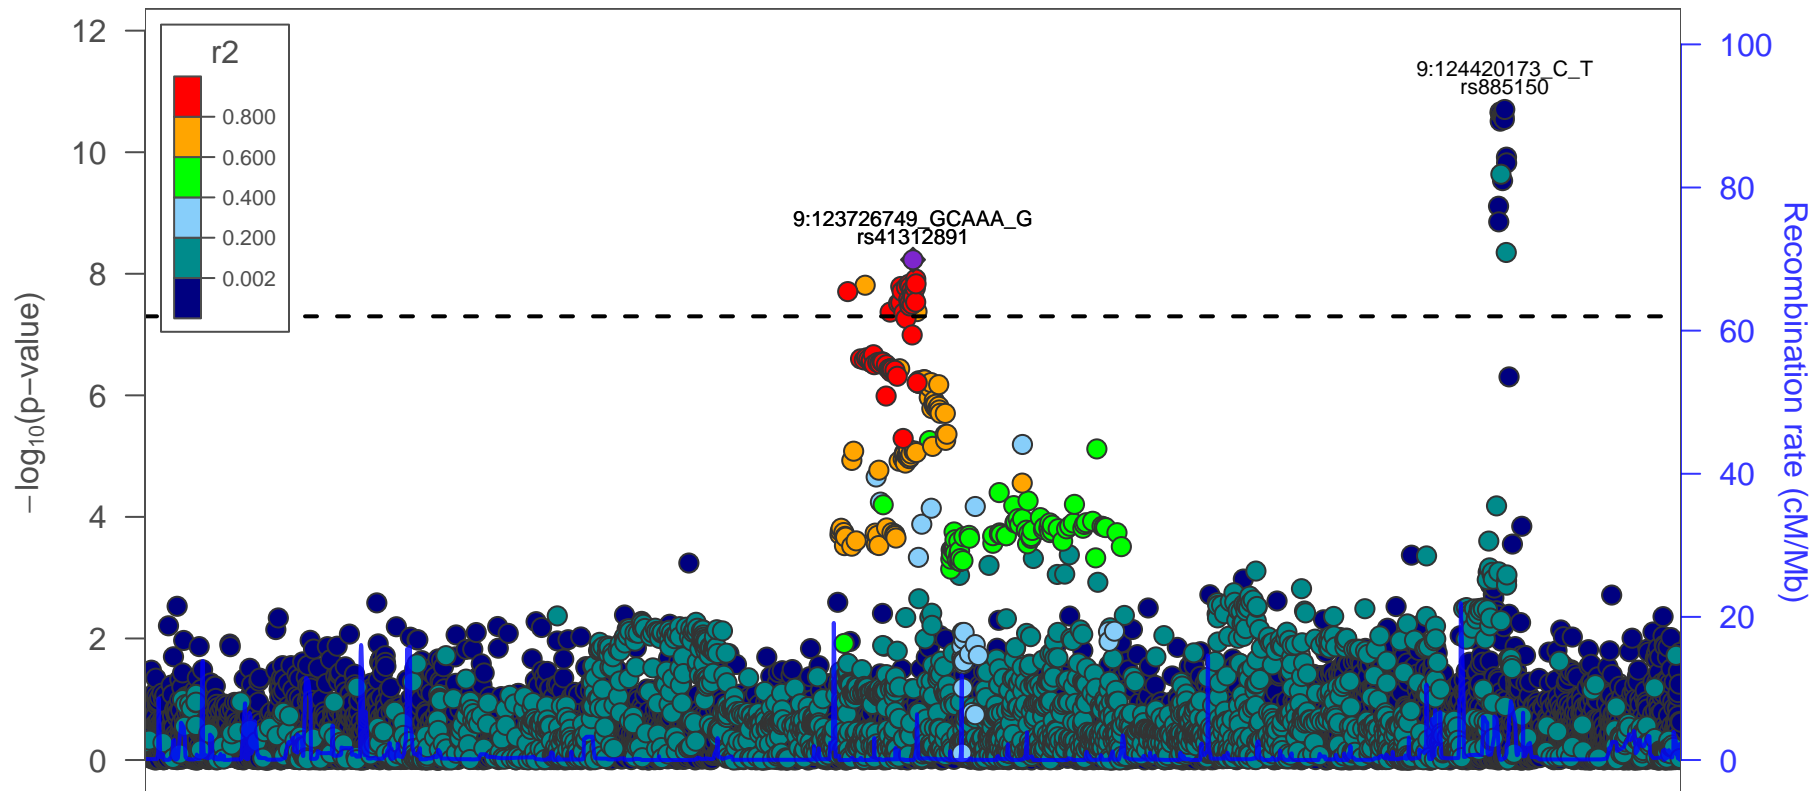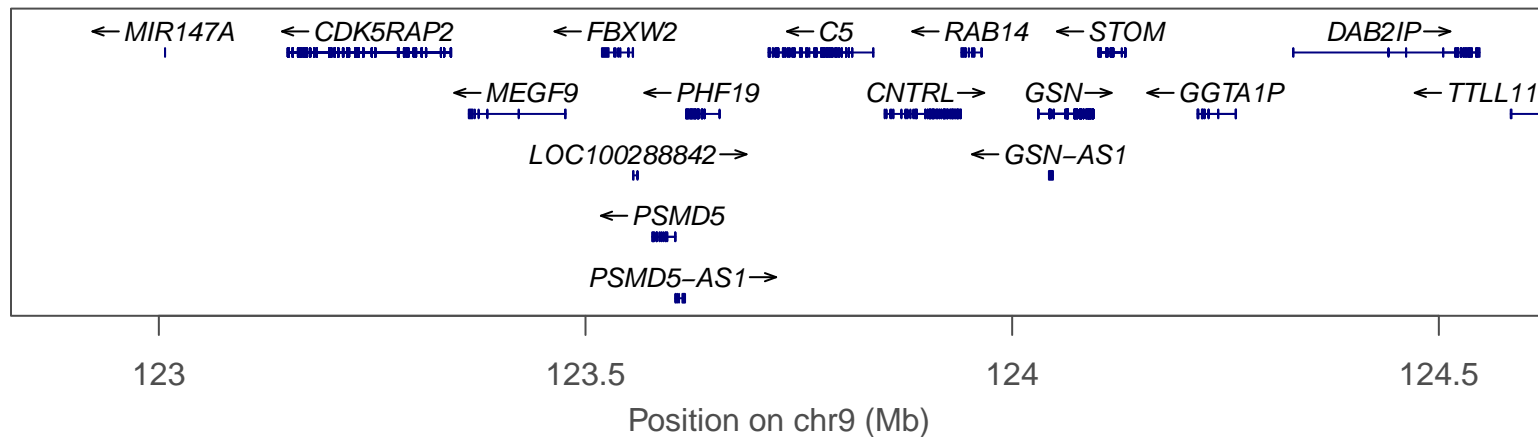

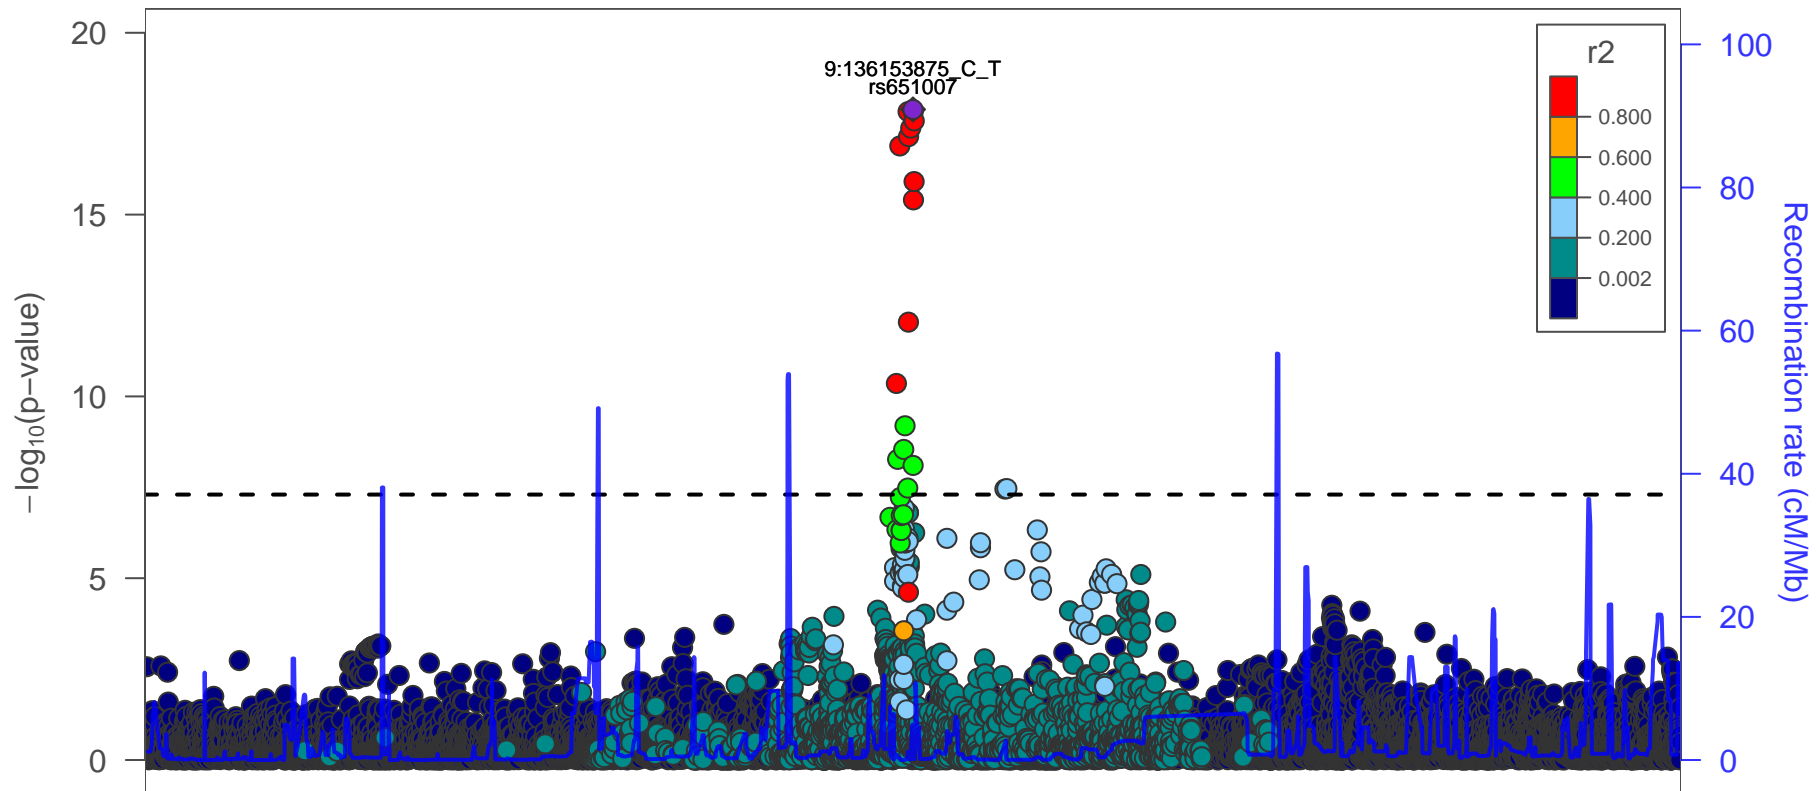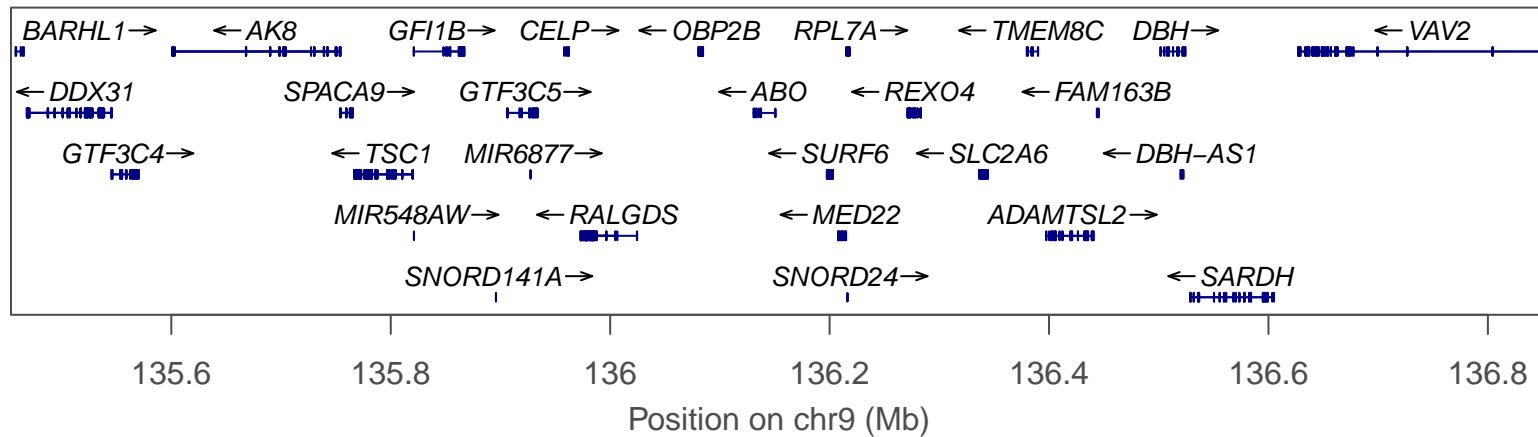

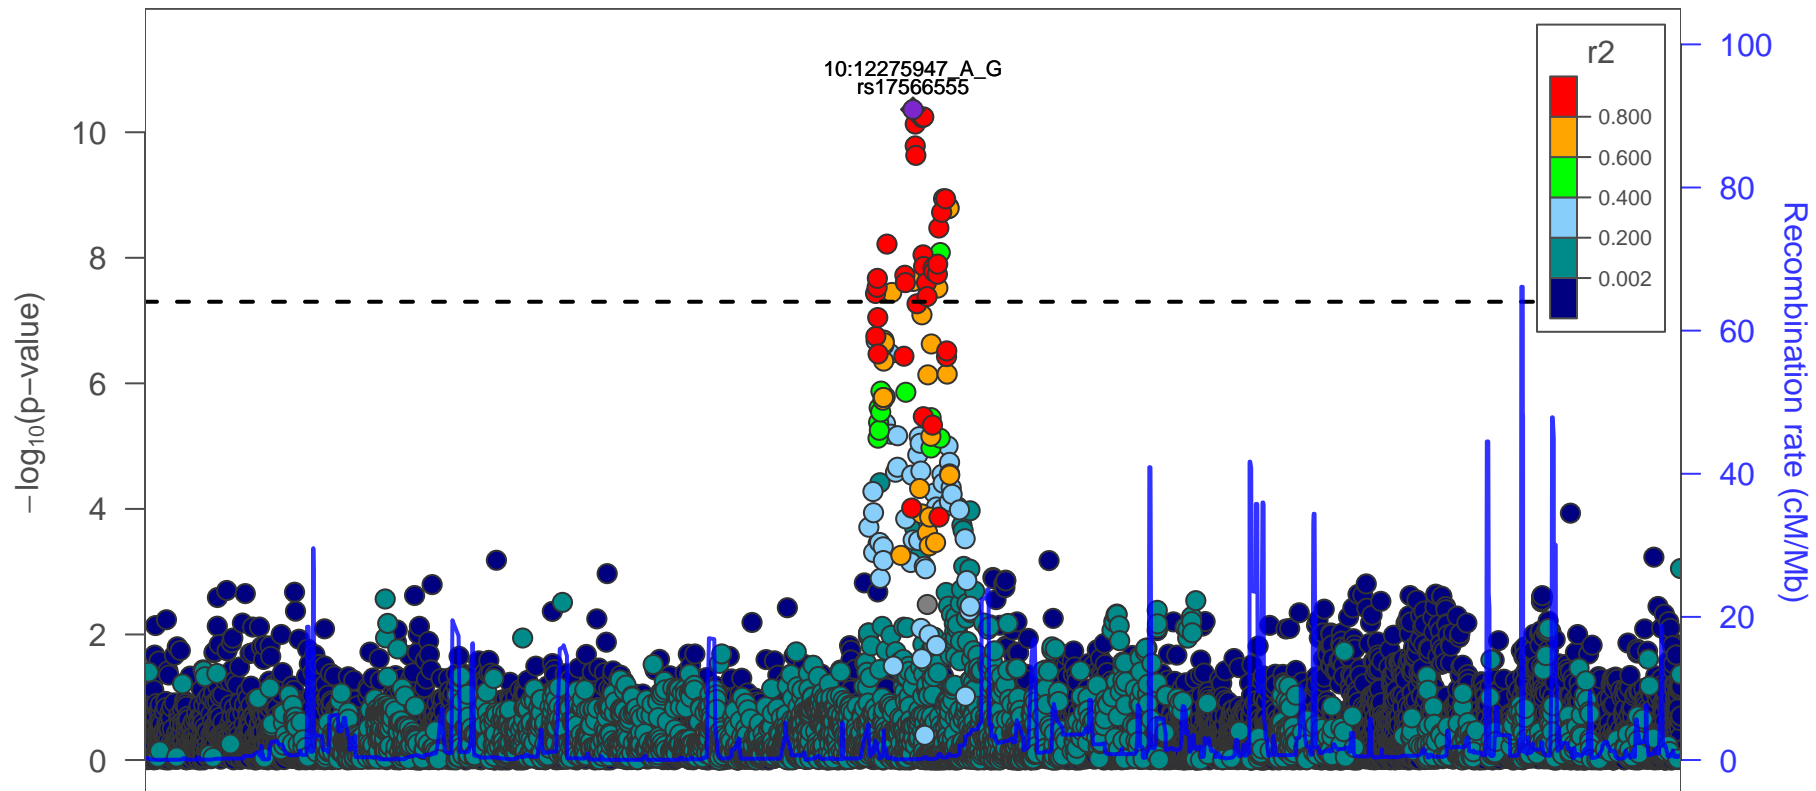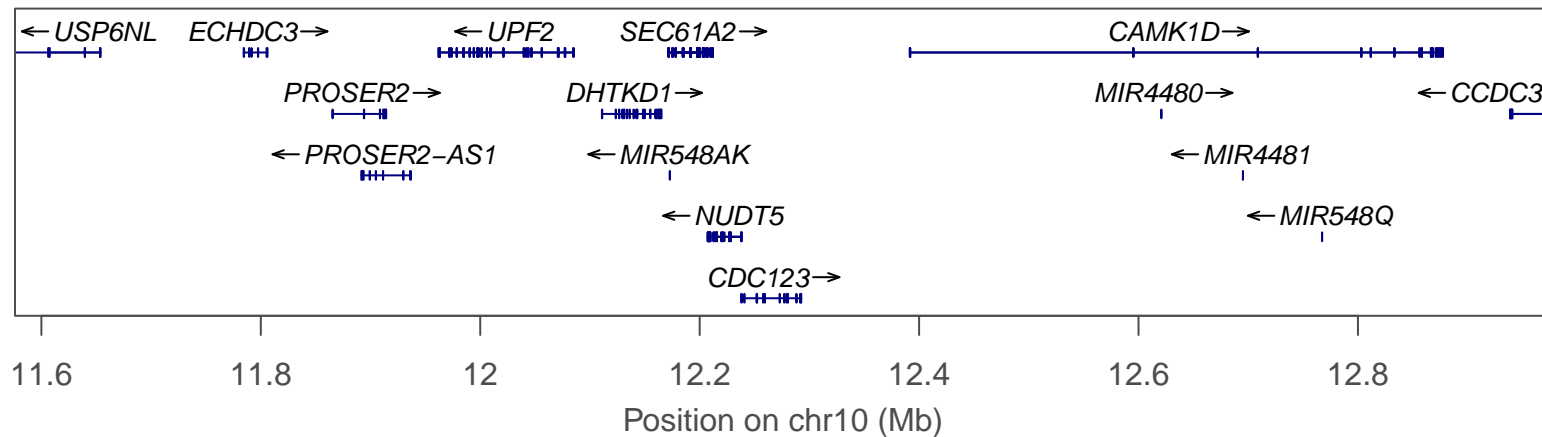



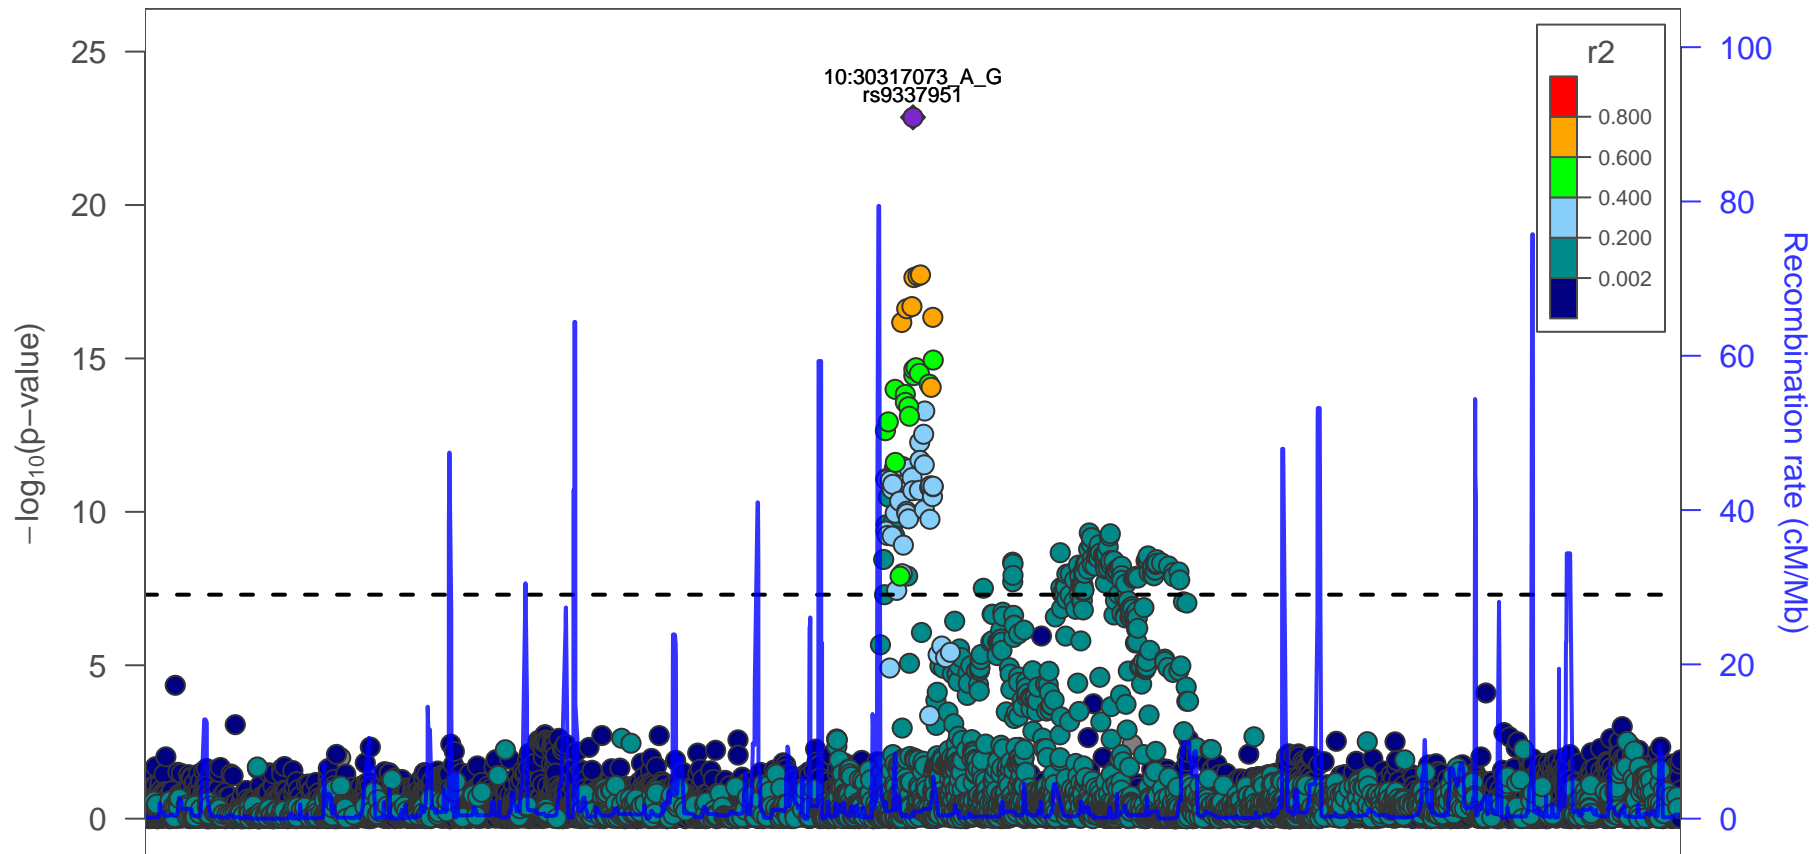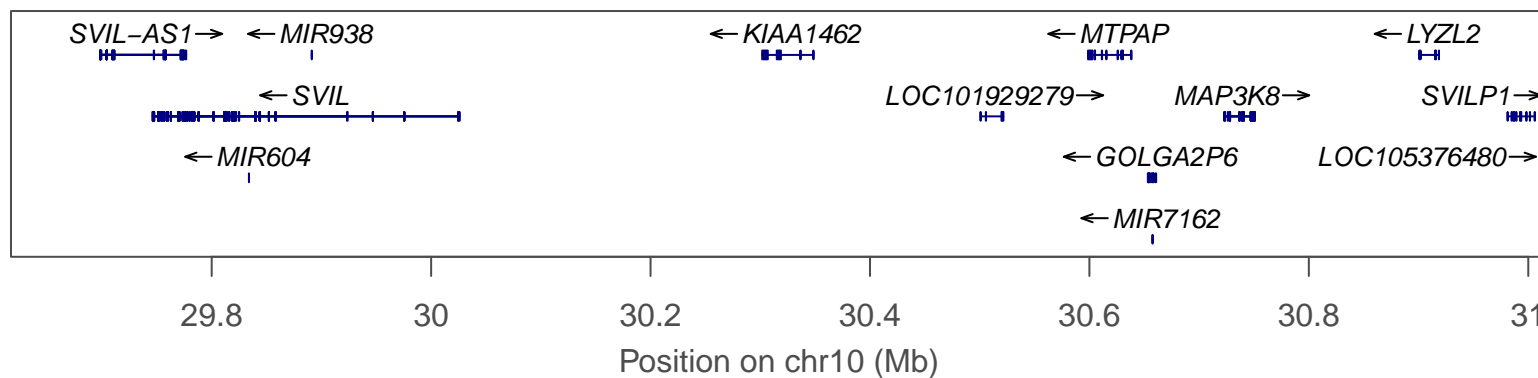

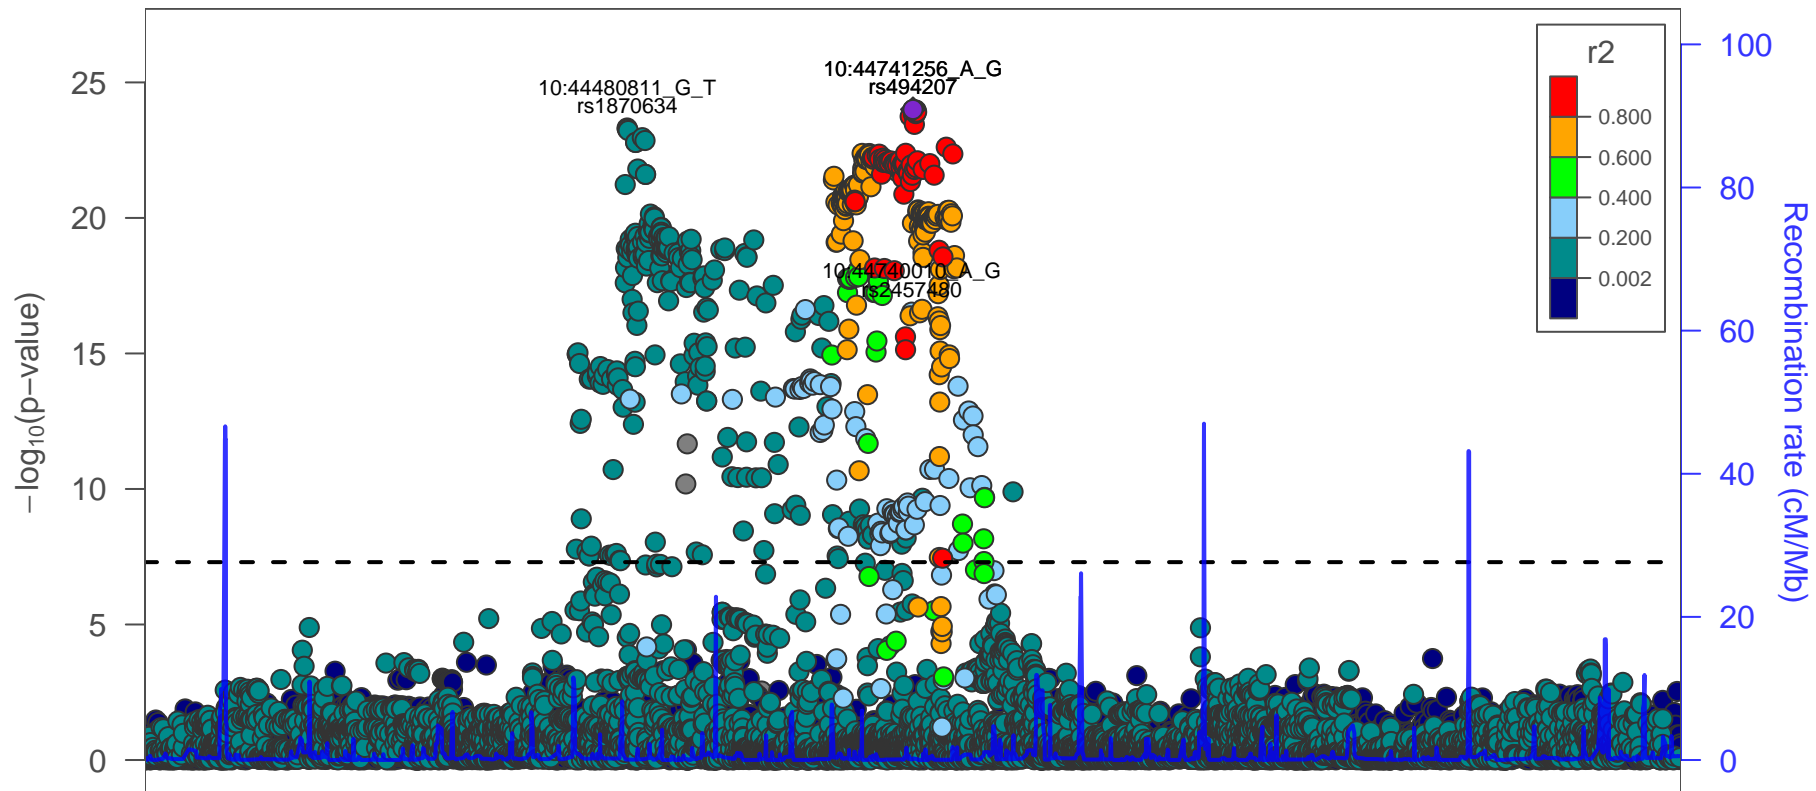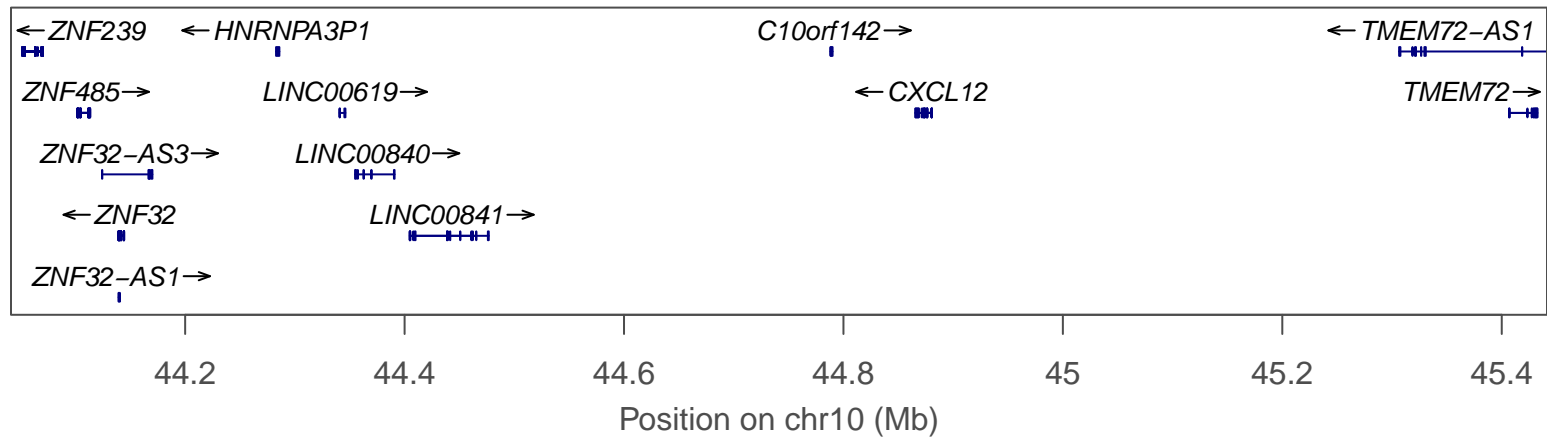

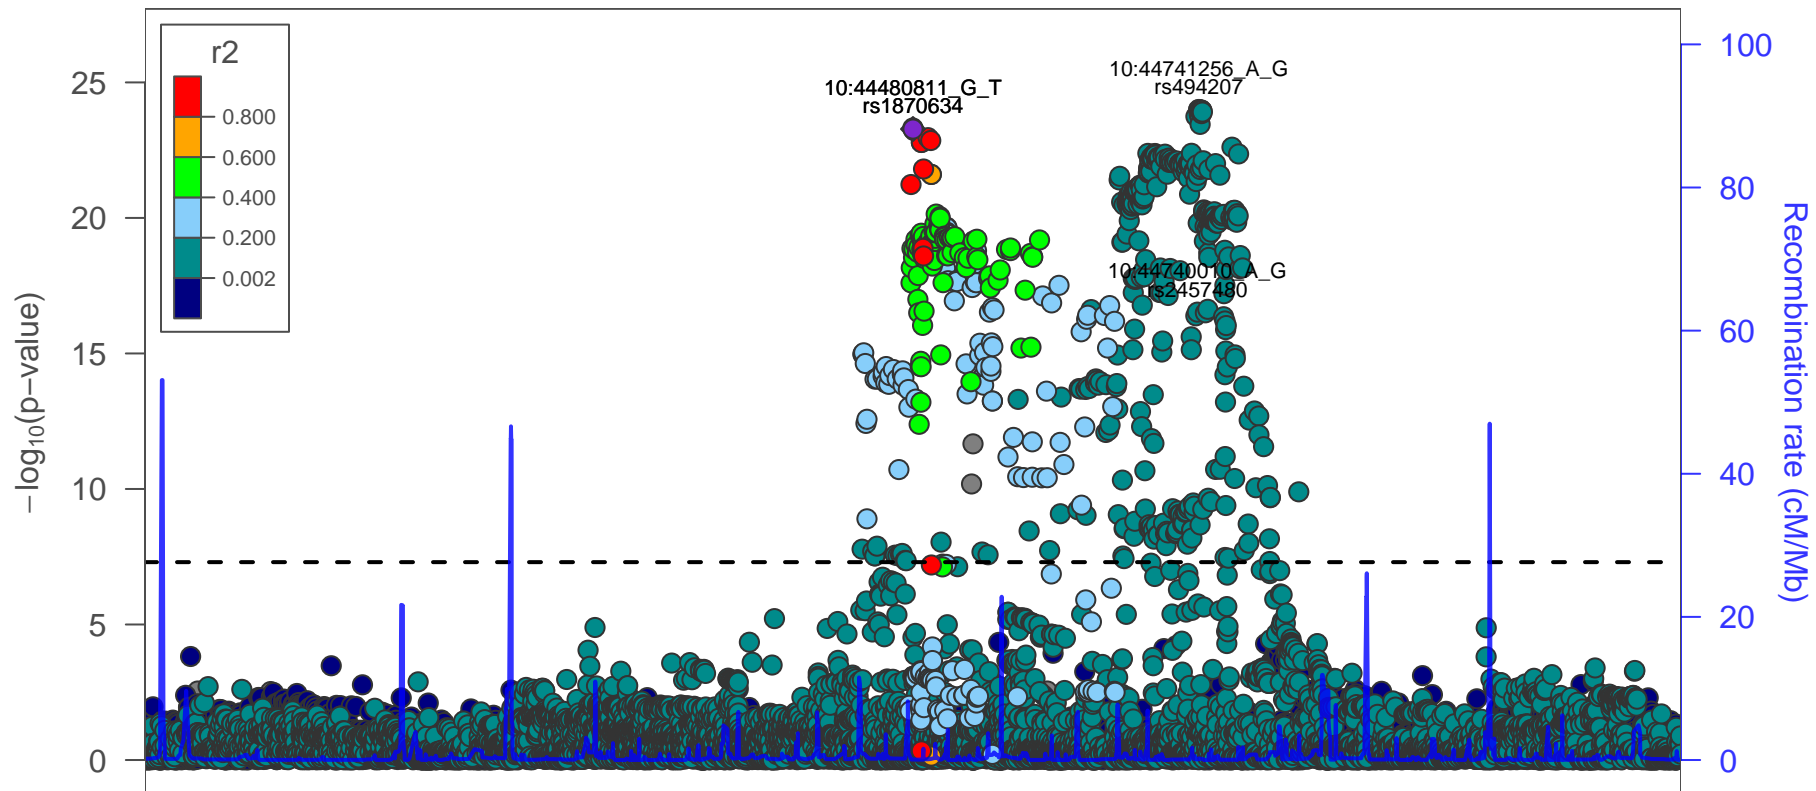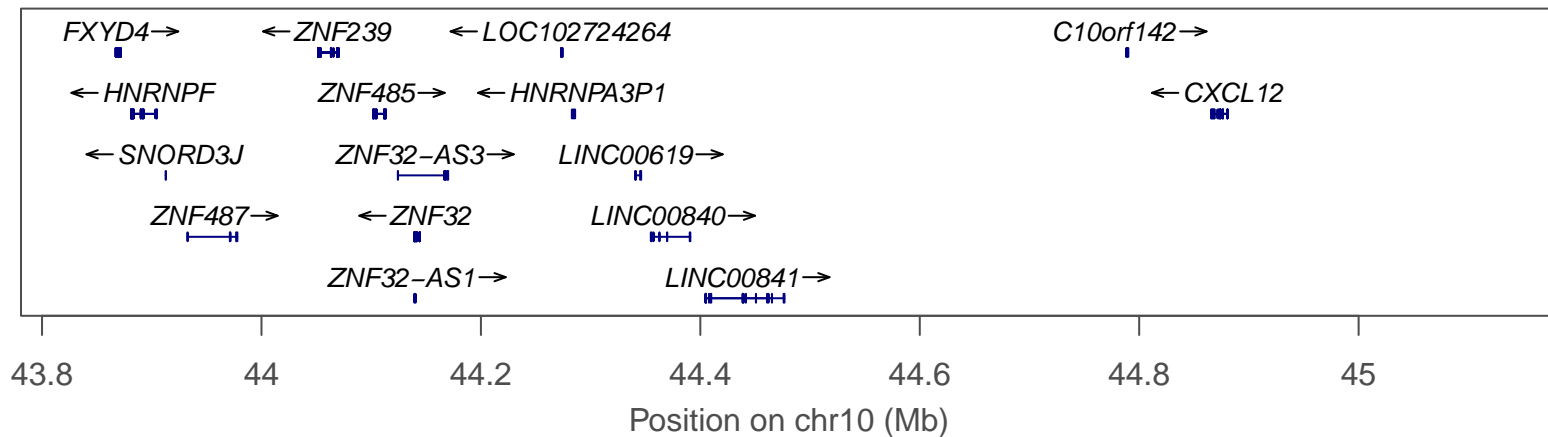

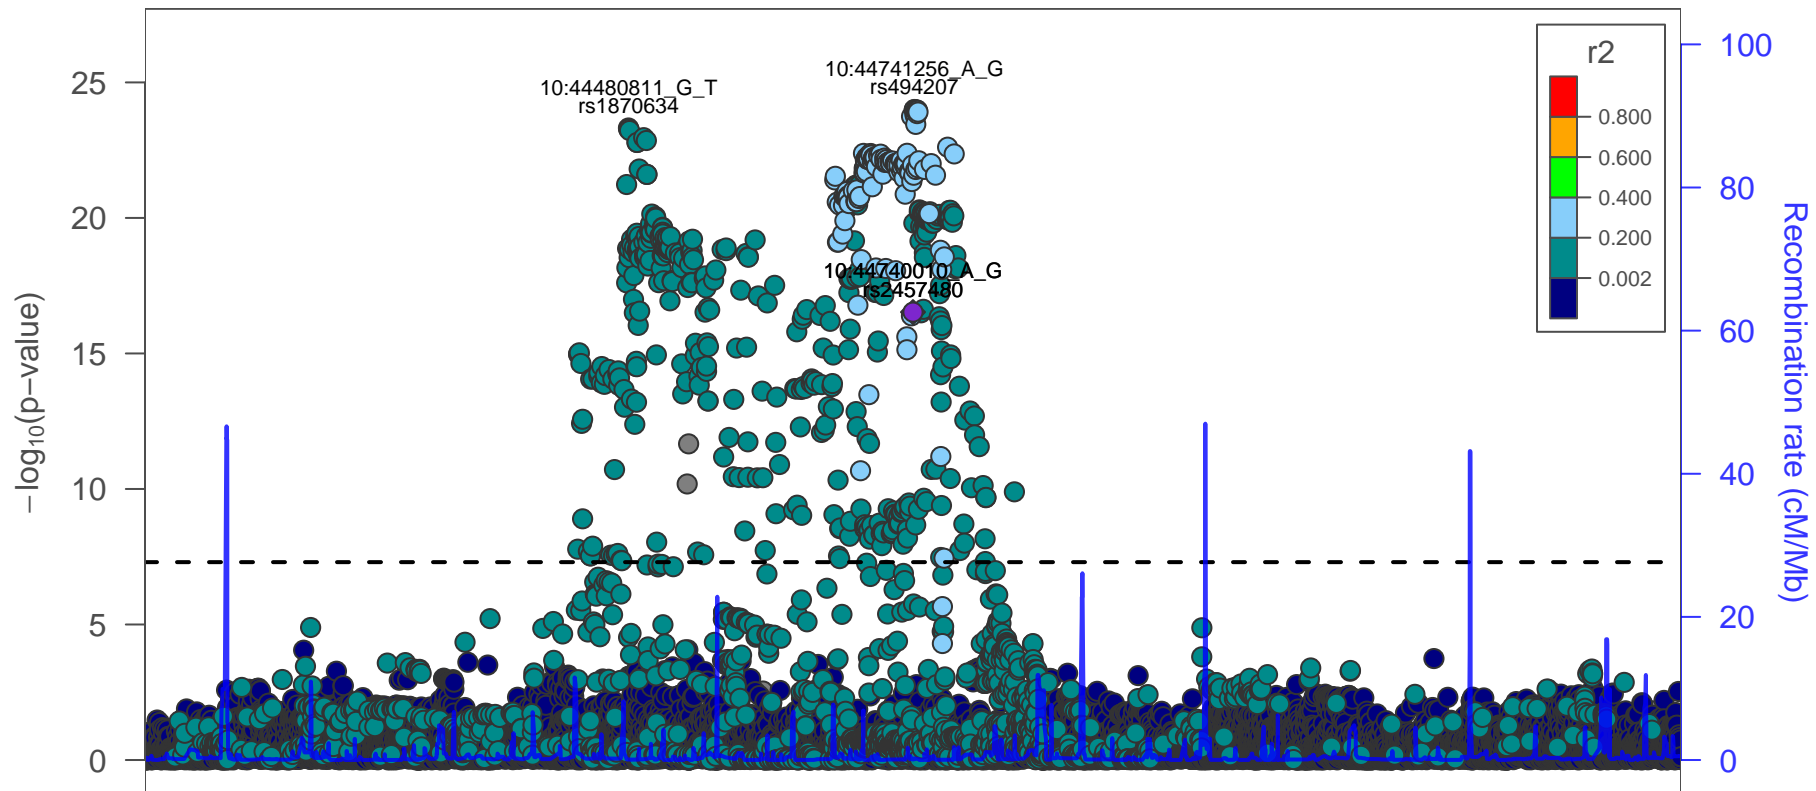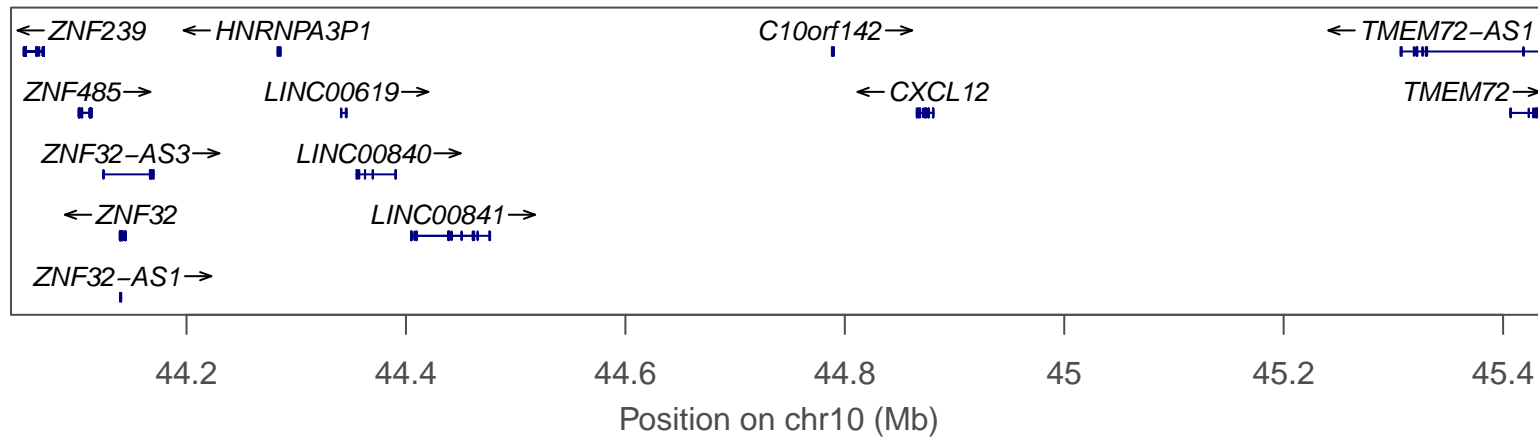

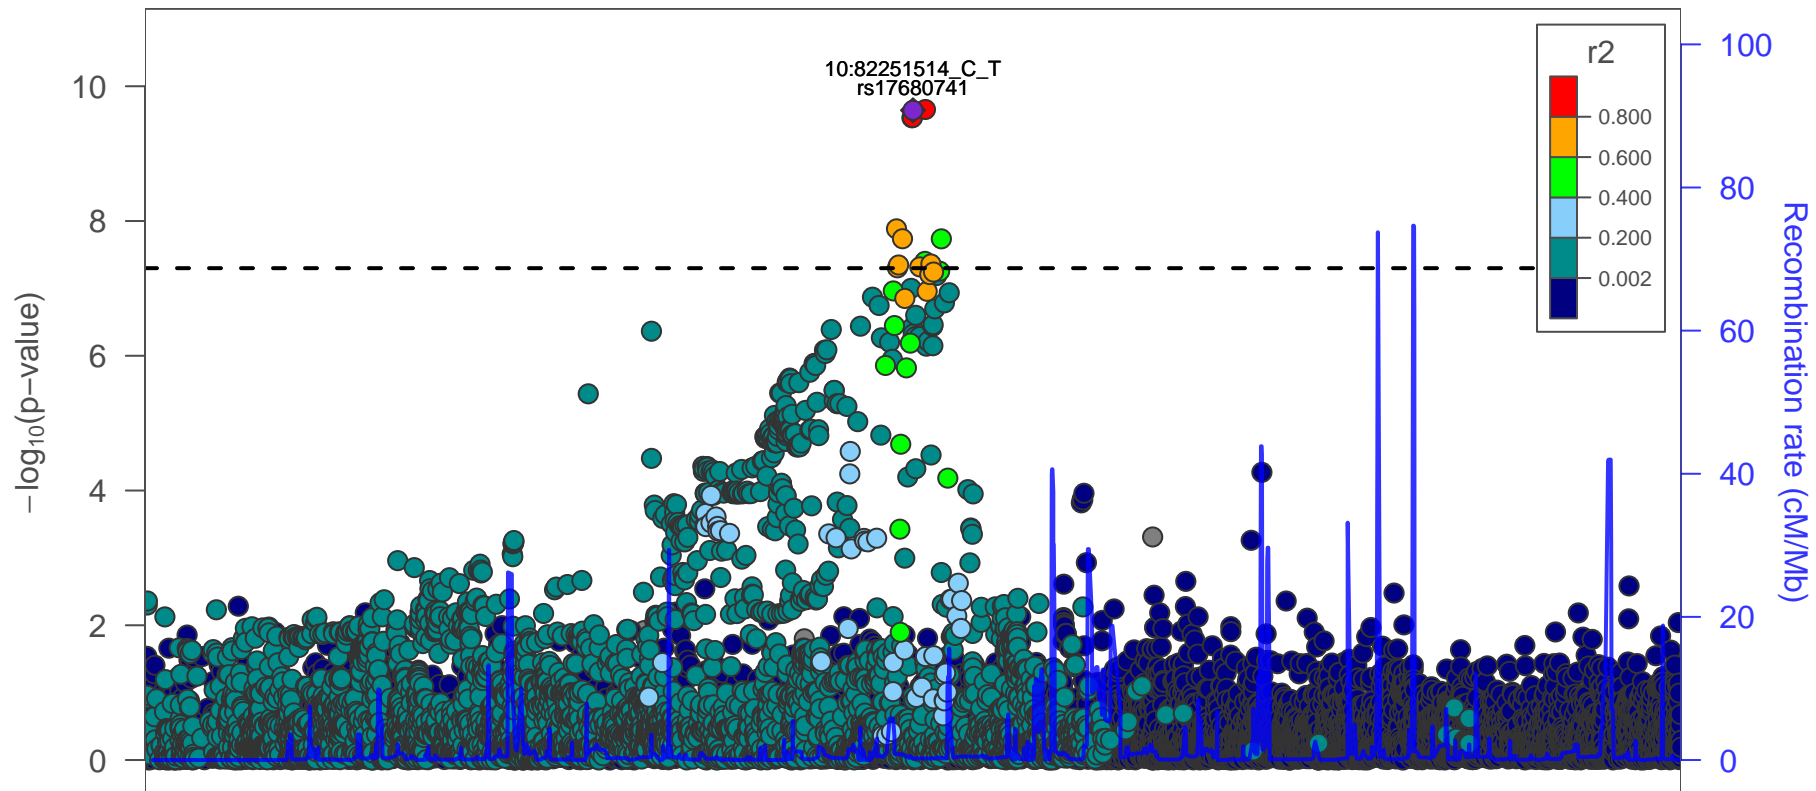

10:82251514\_C\_T  
rs17680741

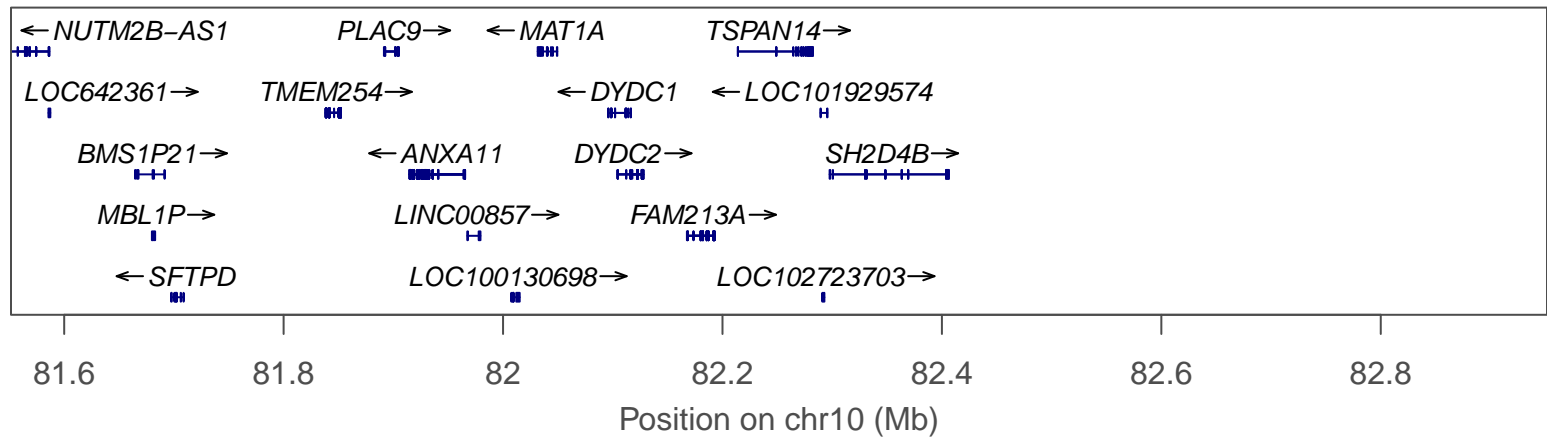

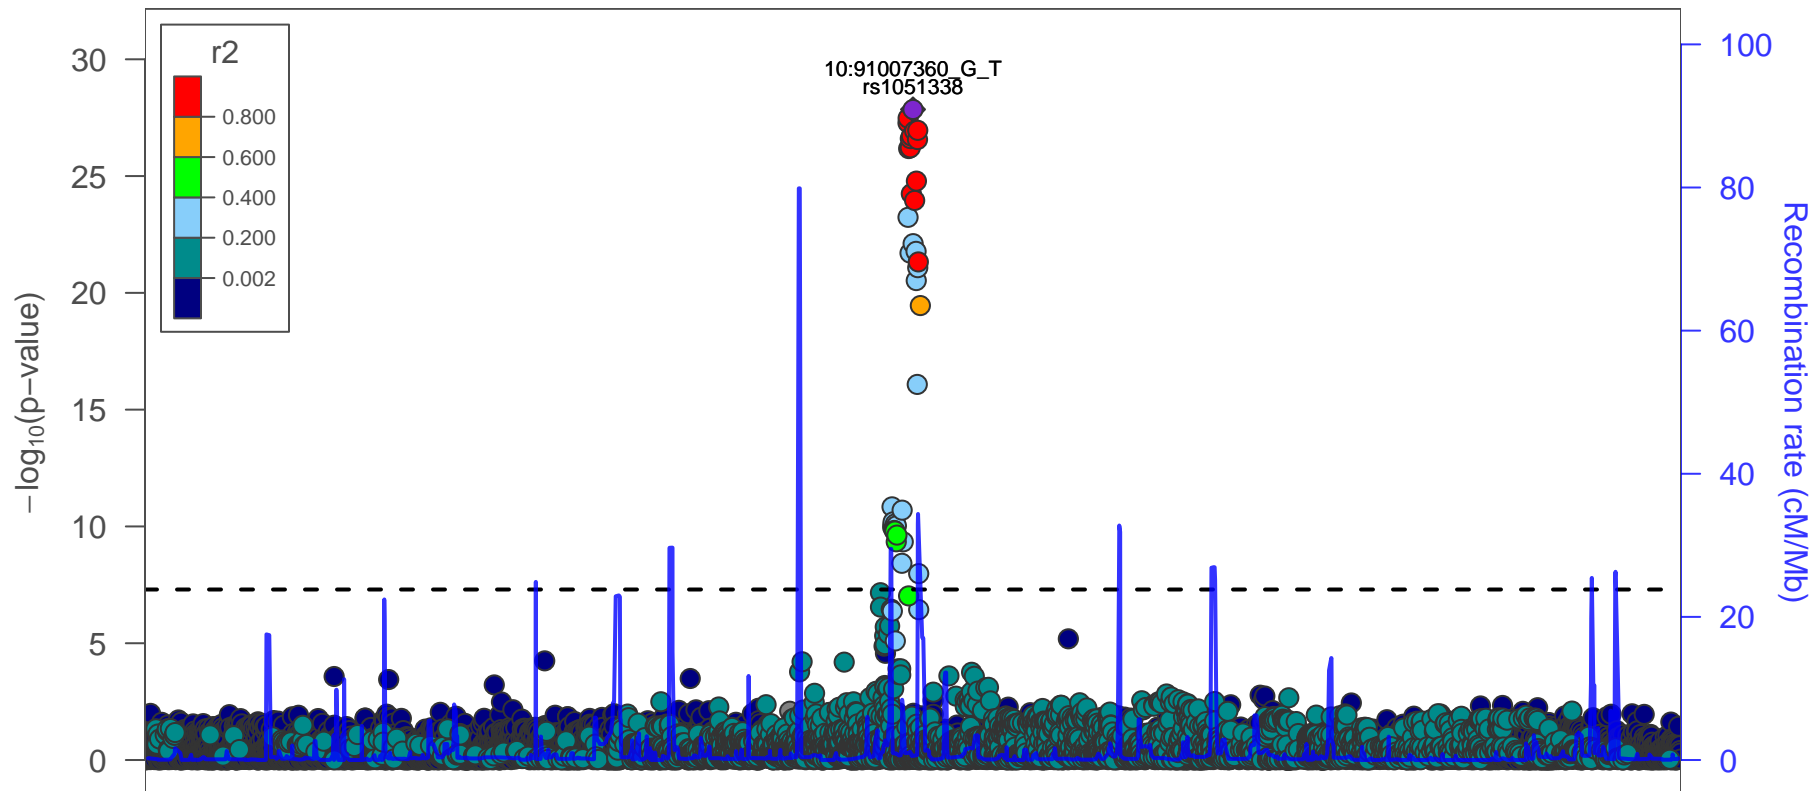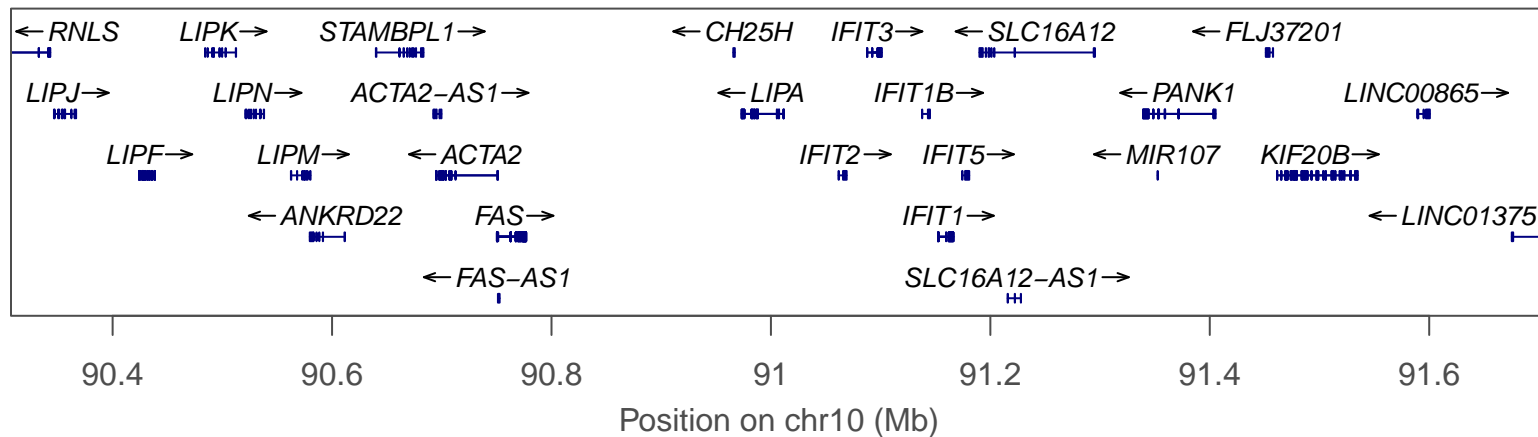

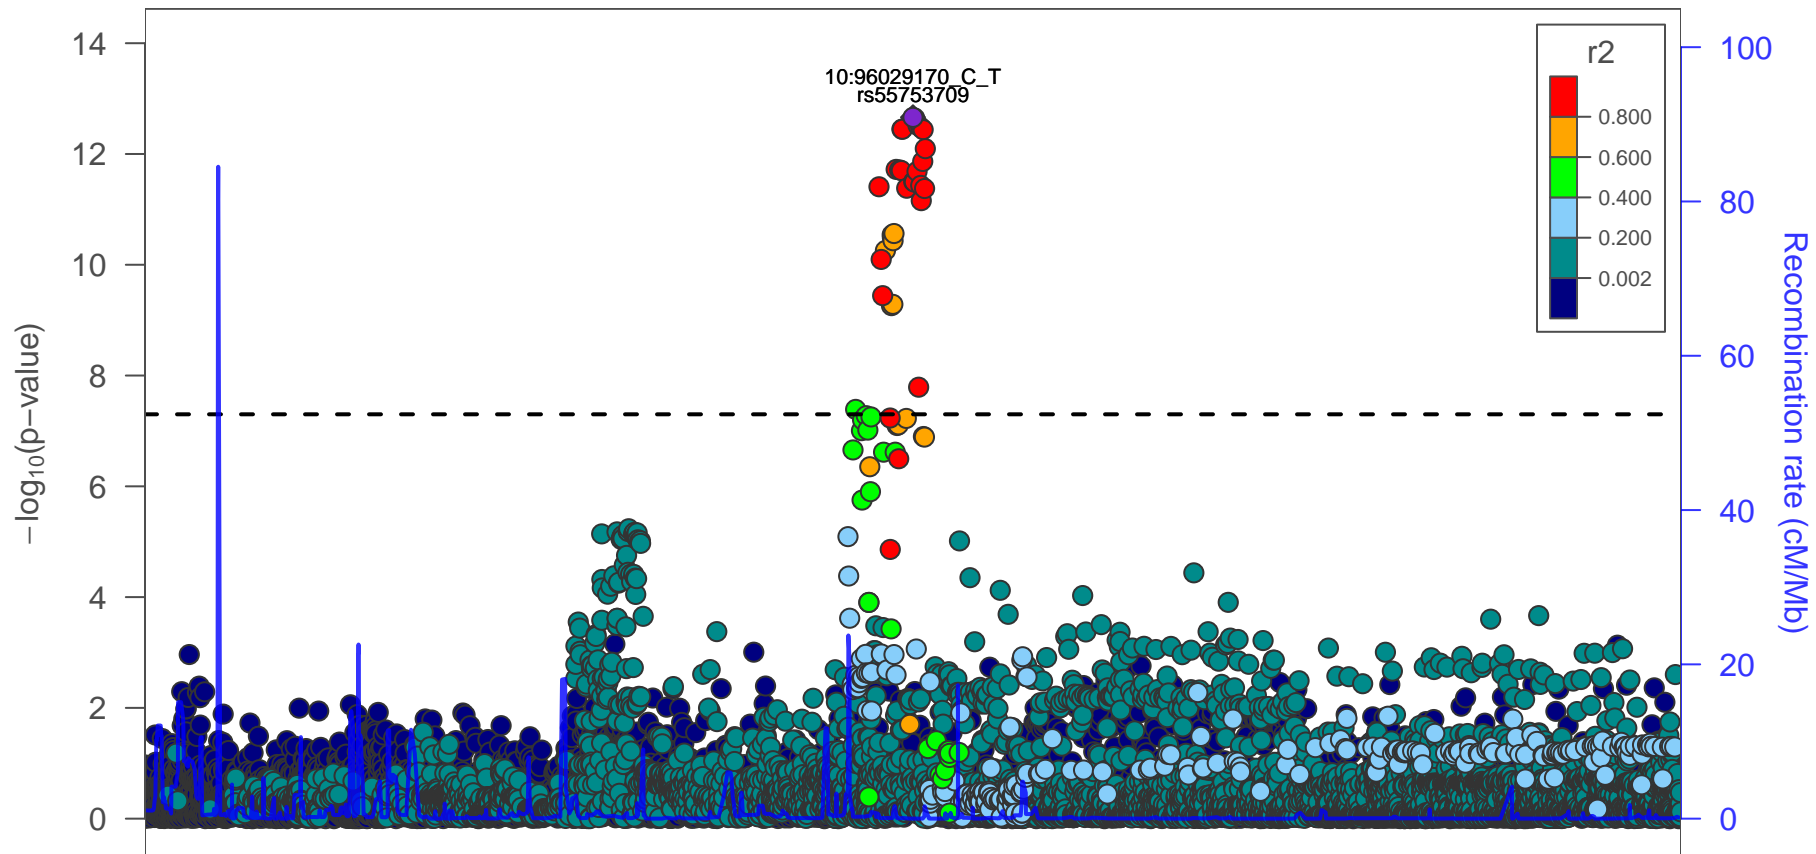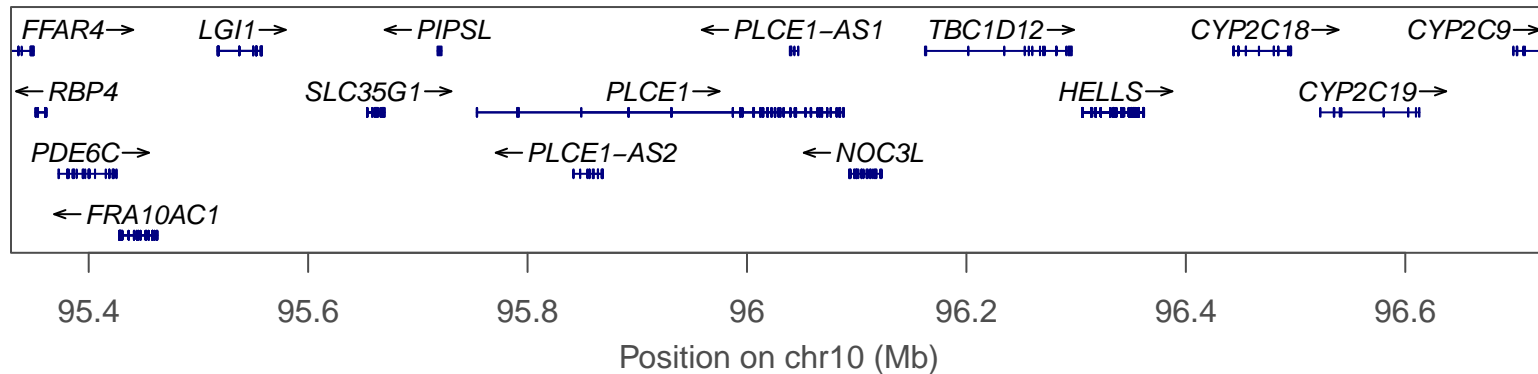

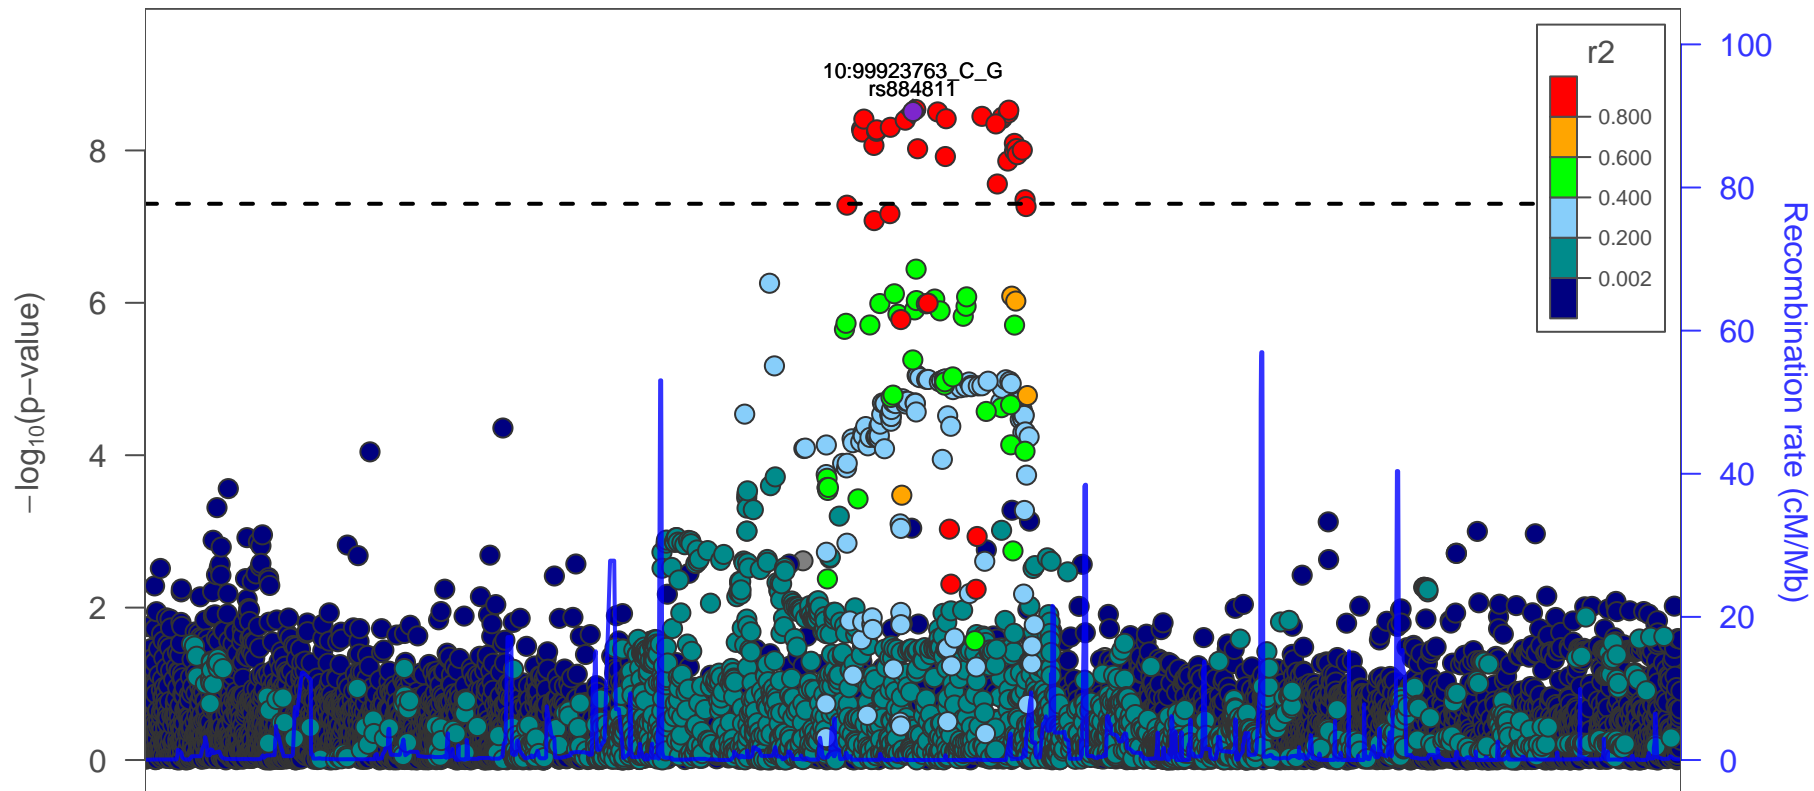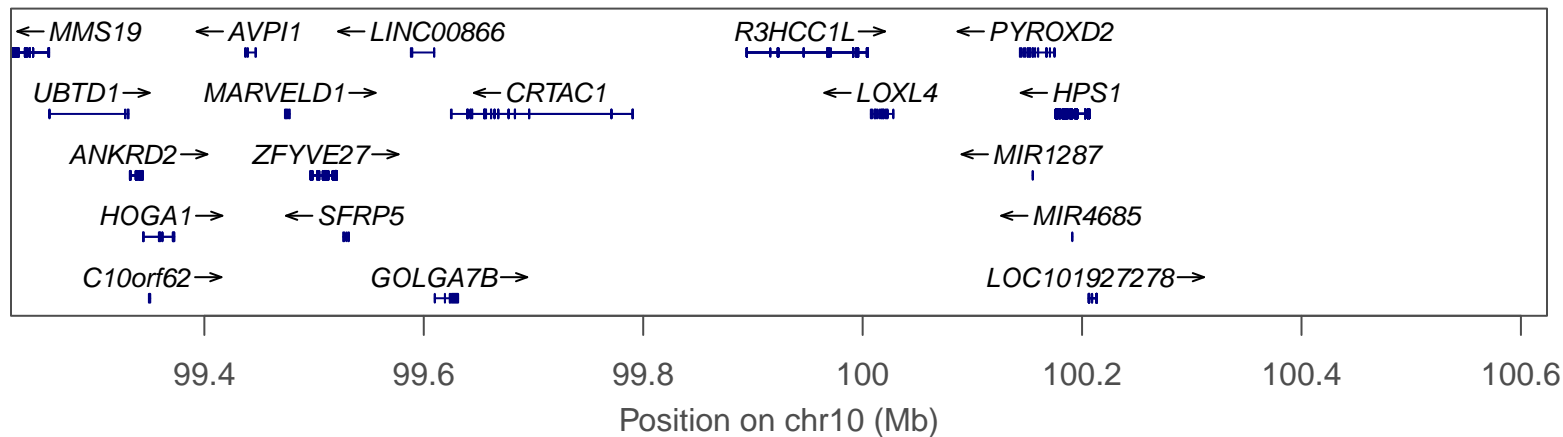



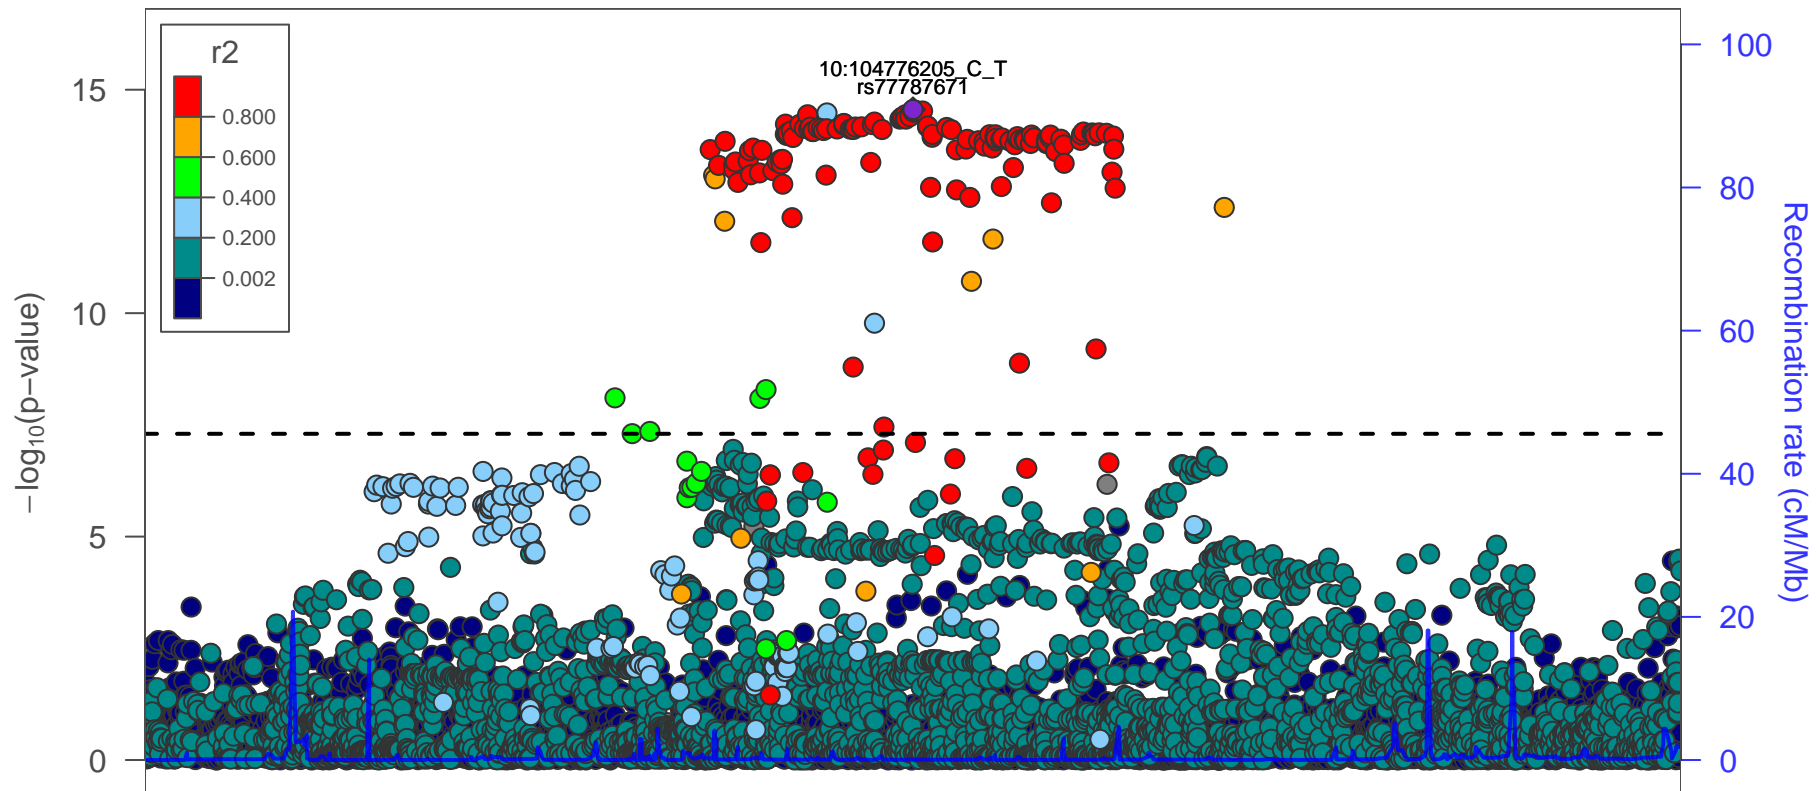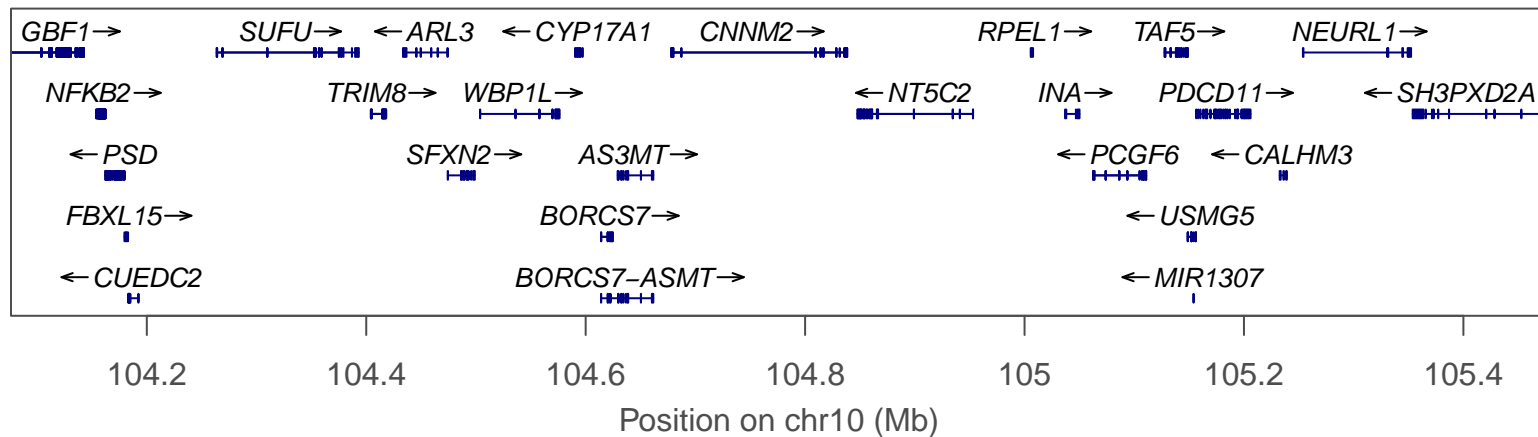

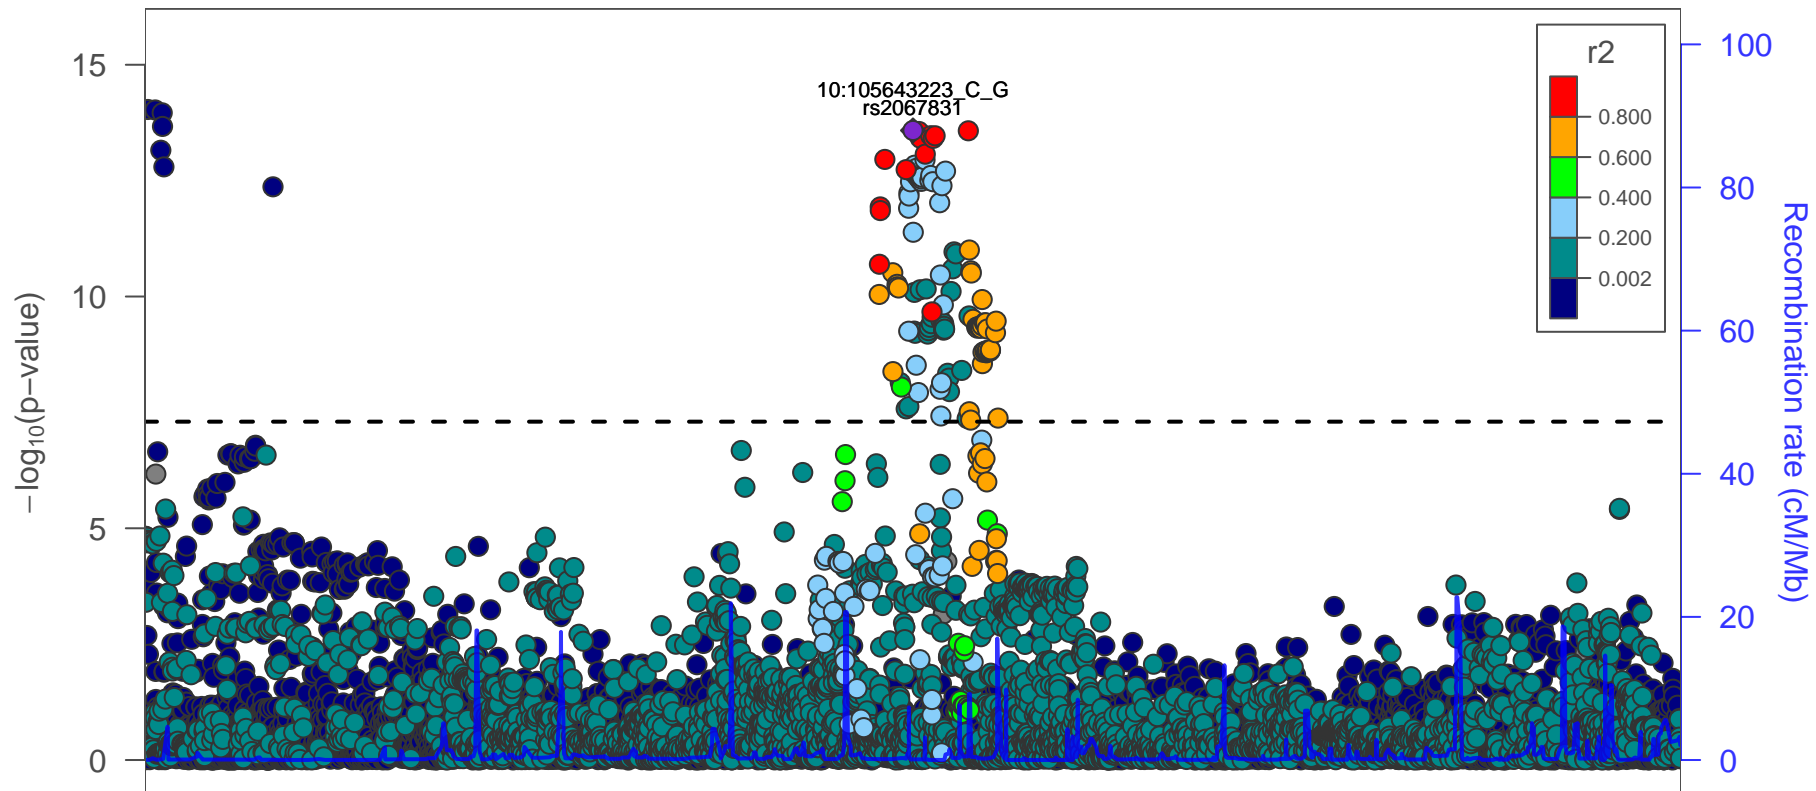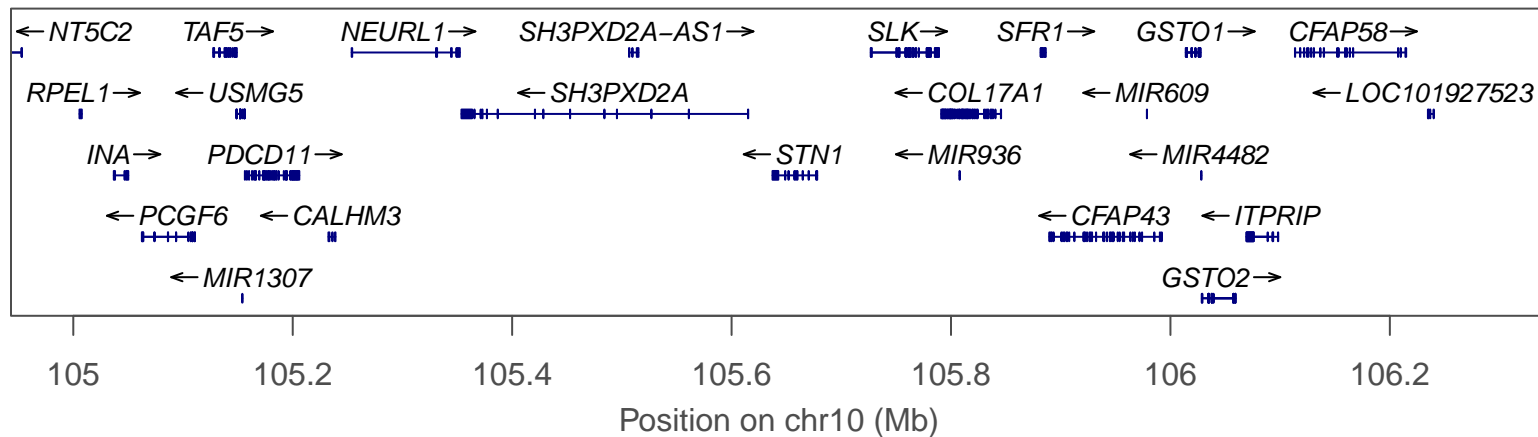

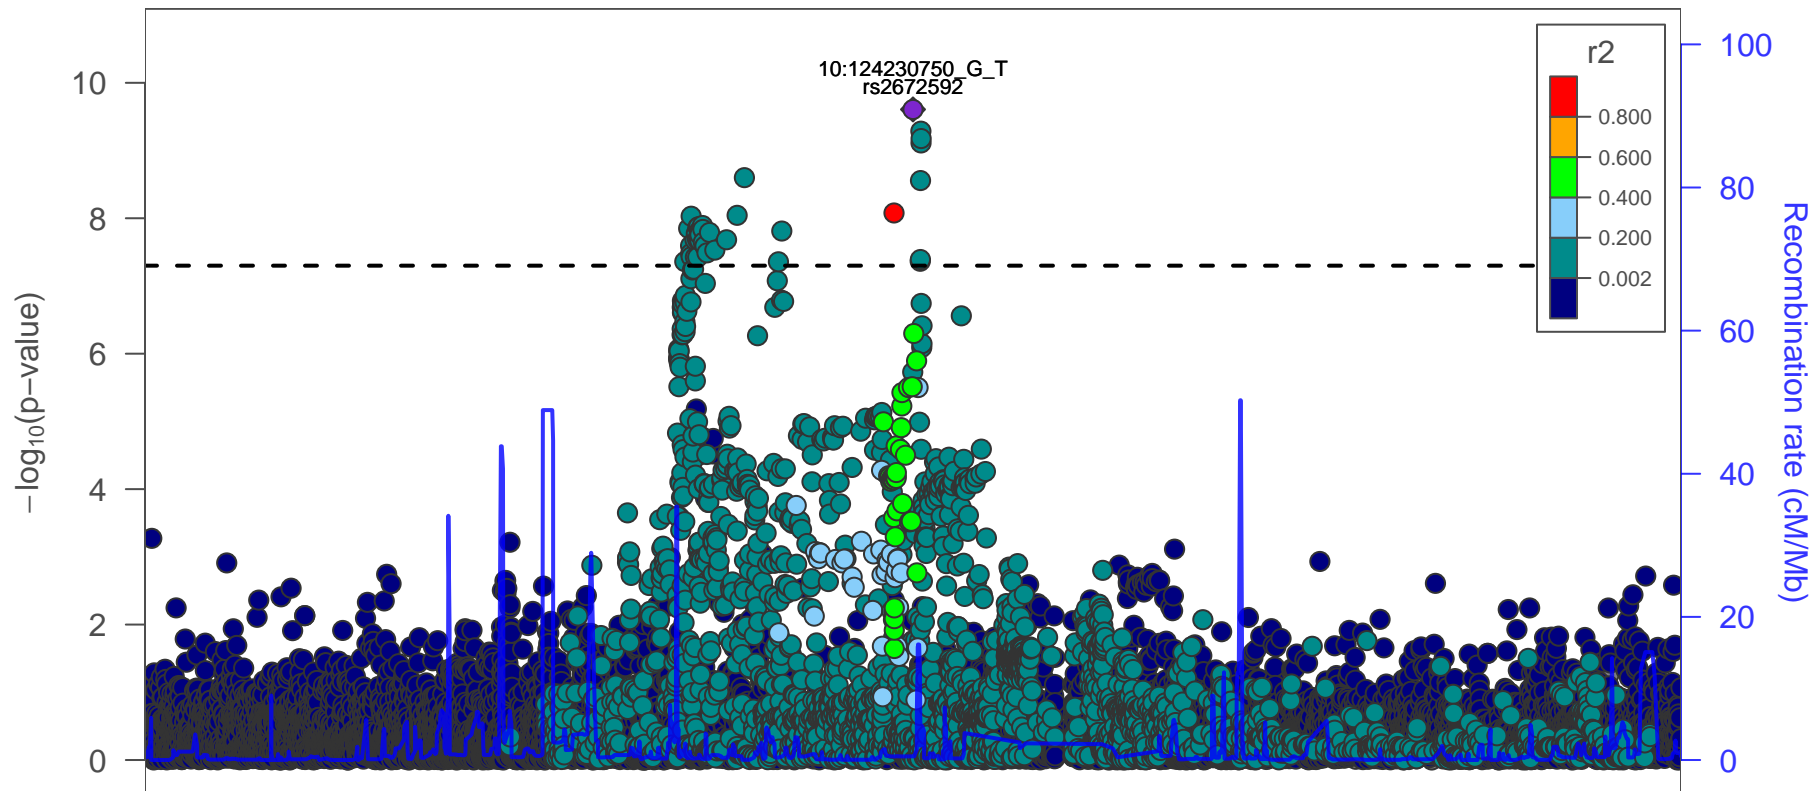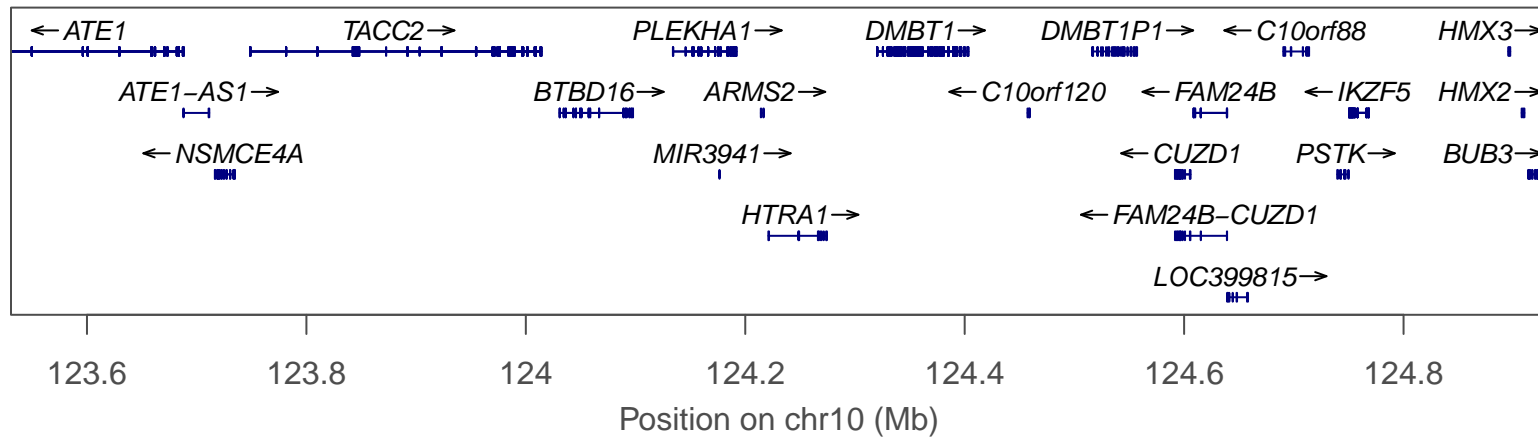

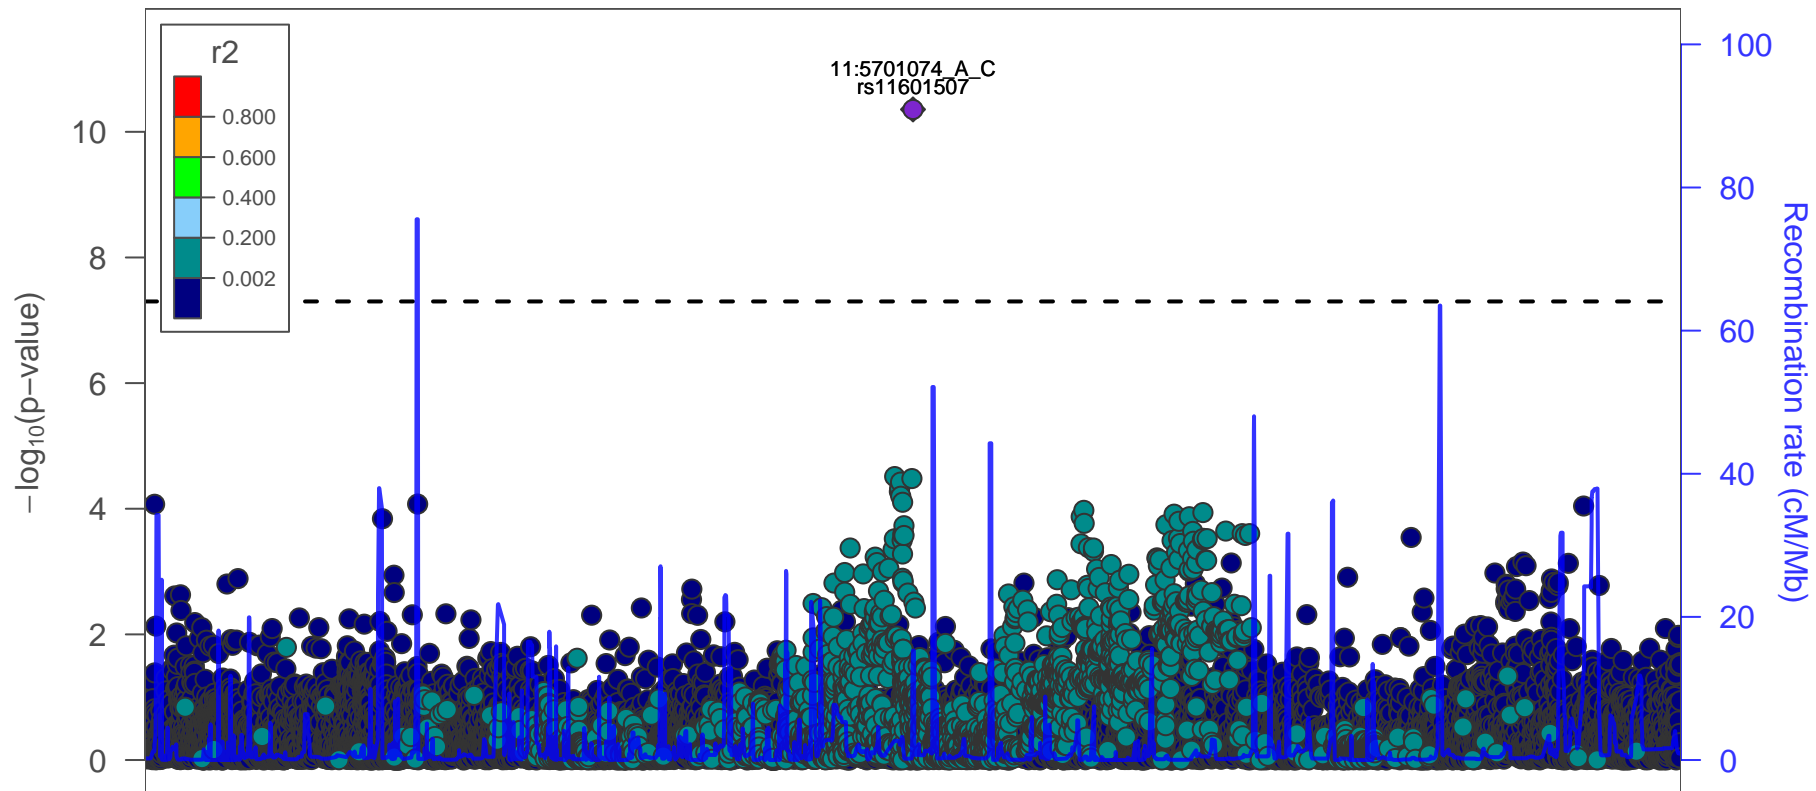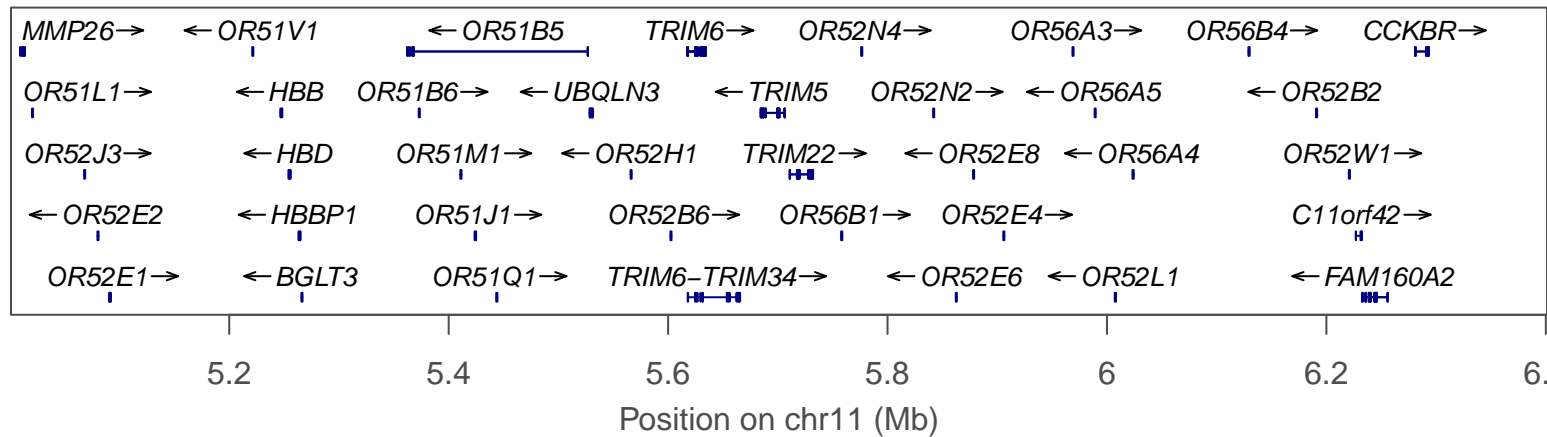

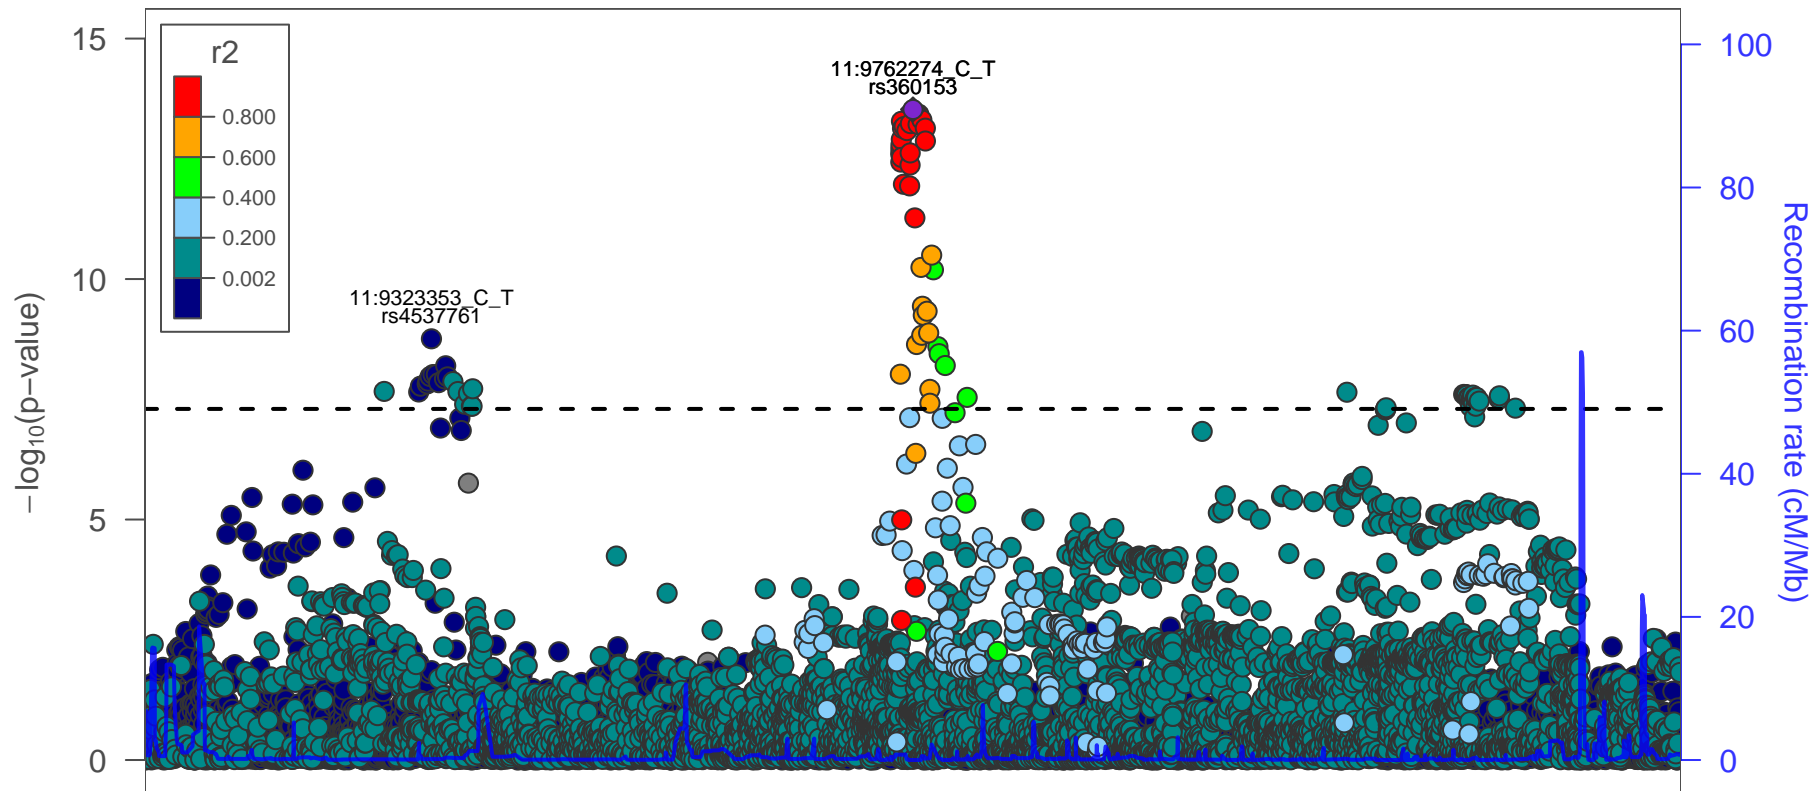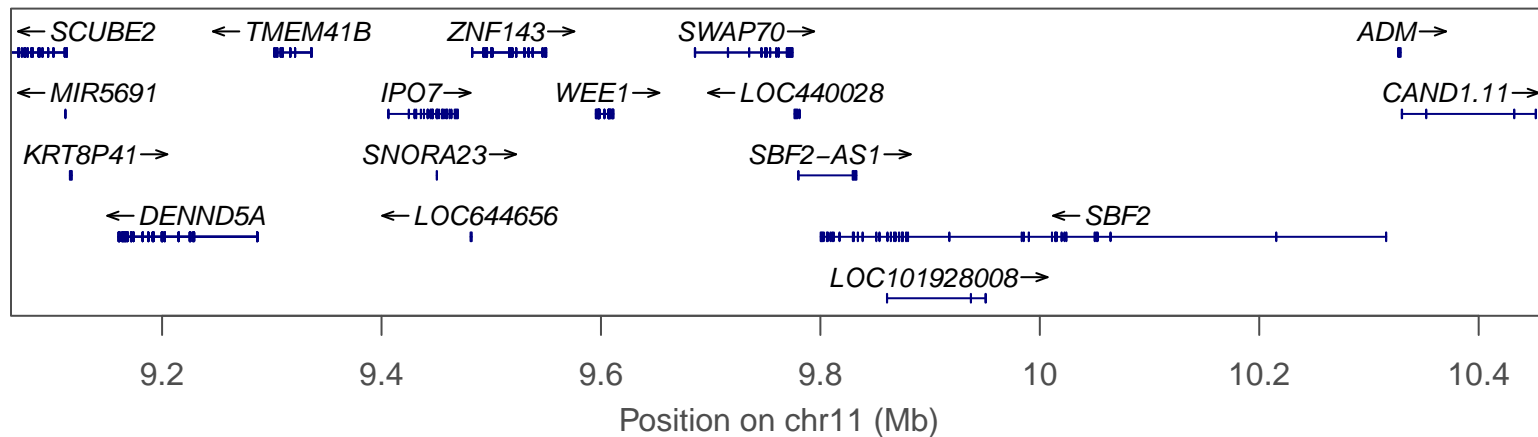

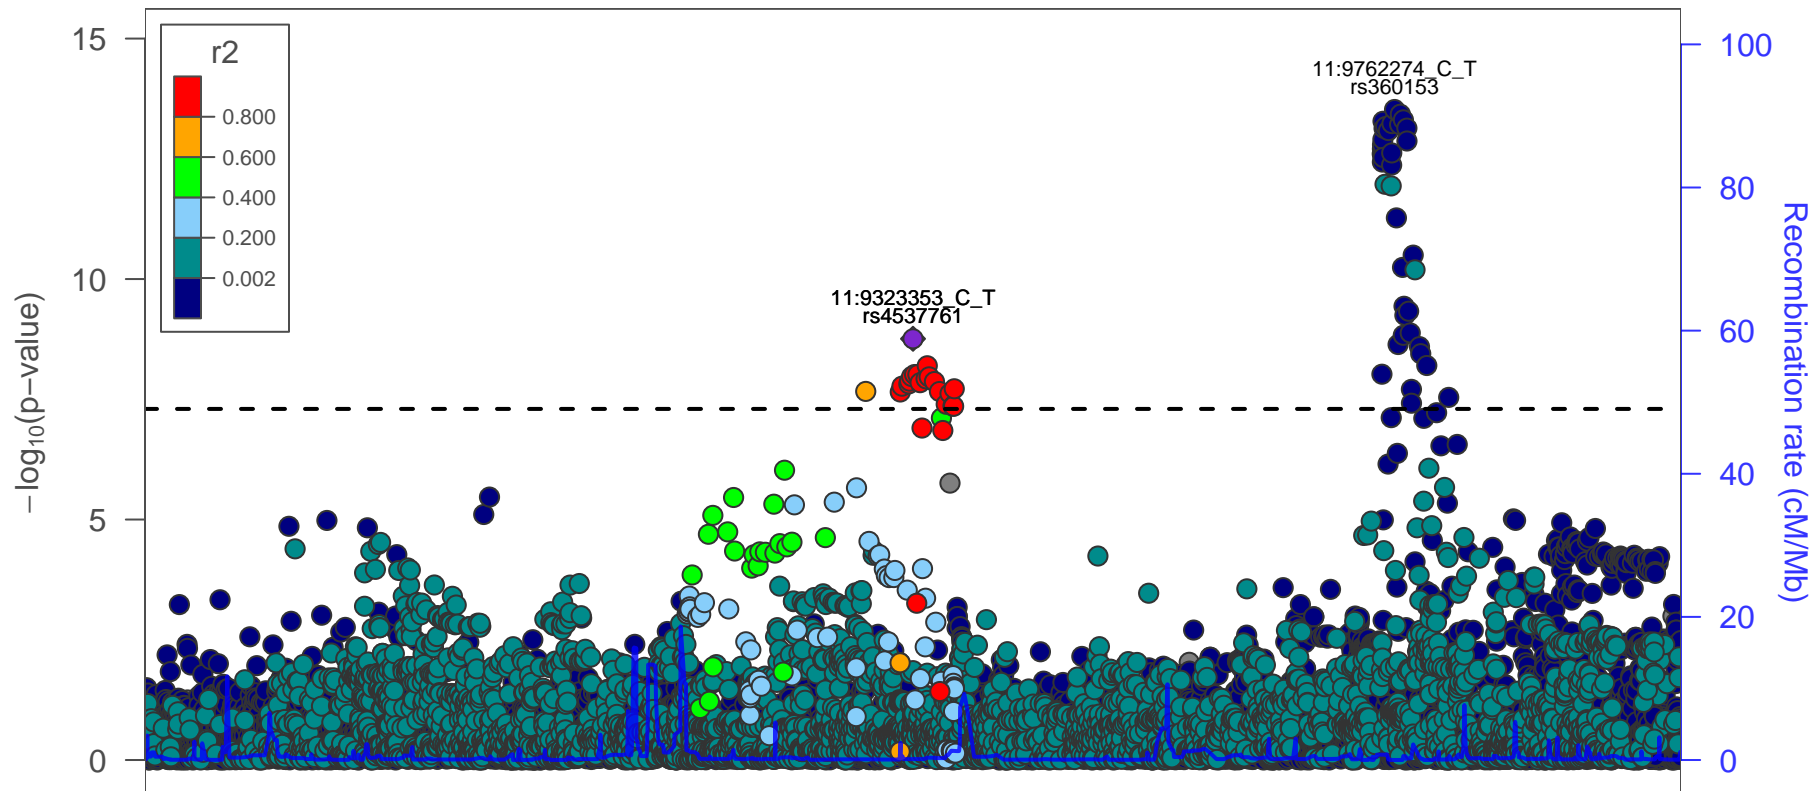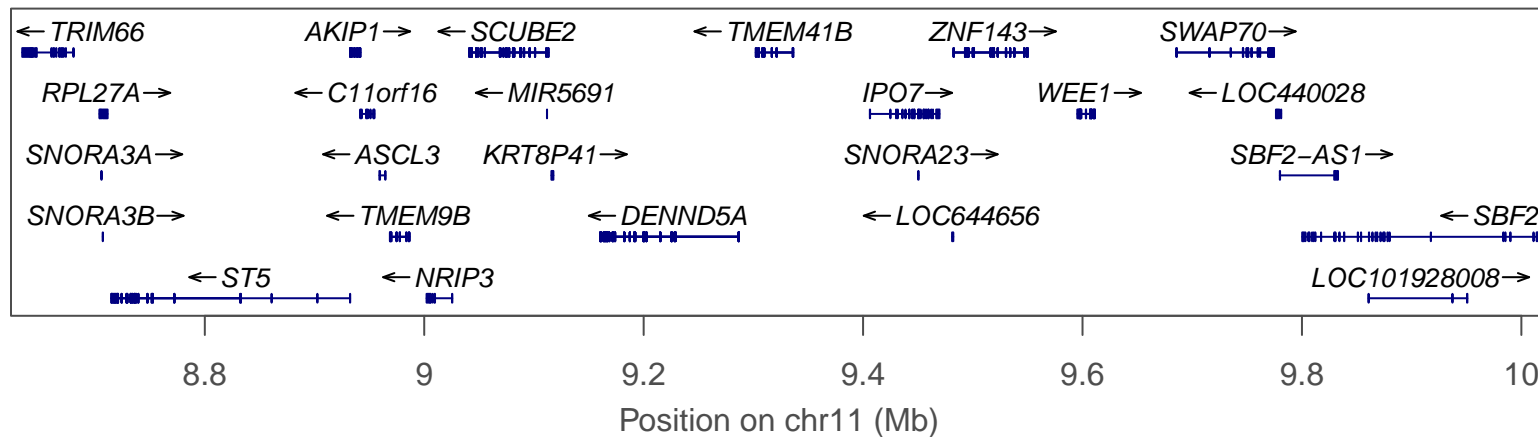

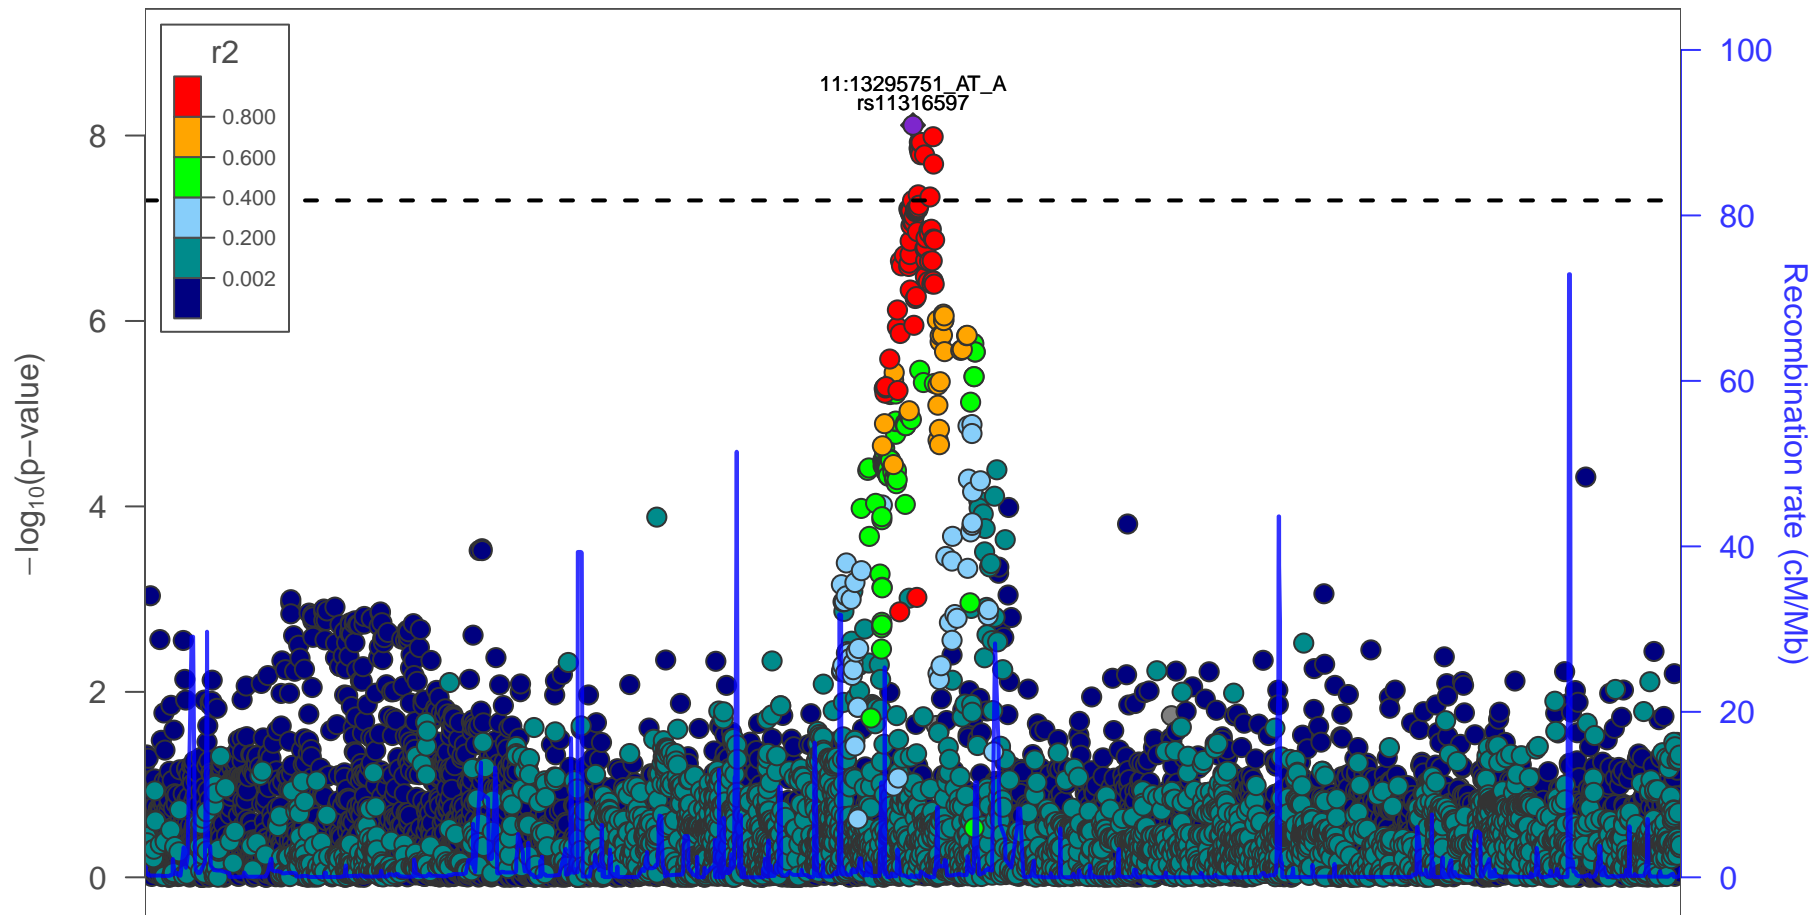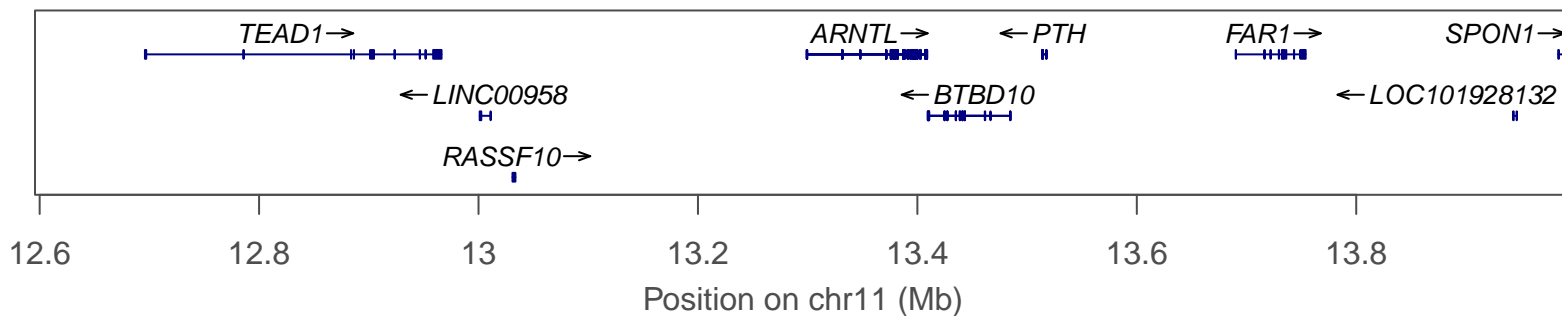

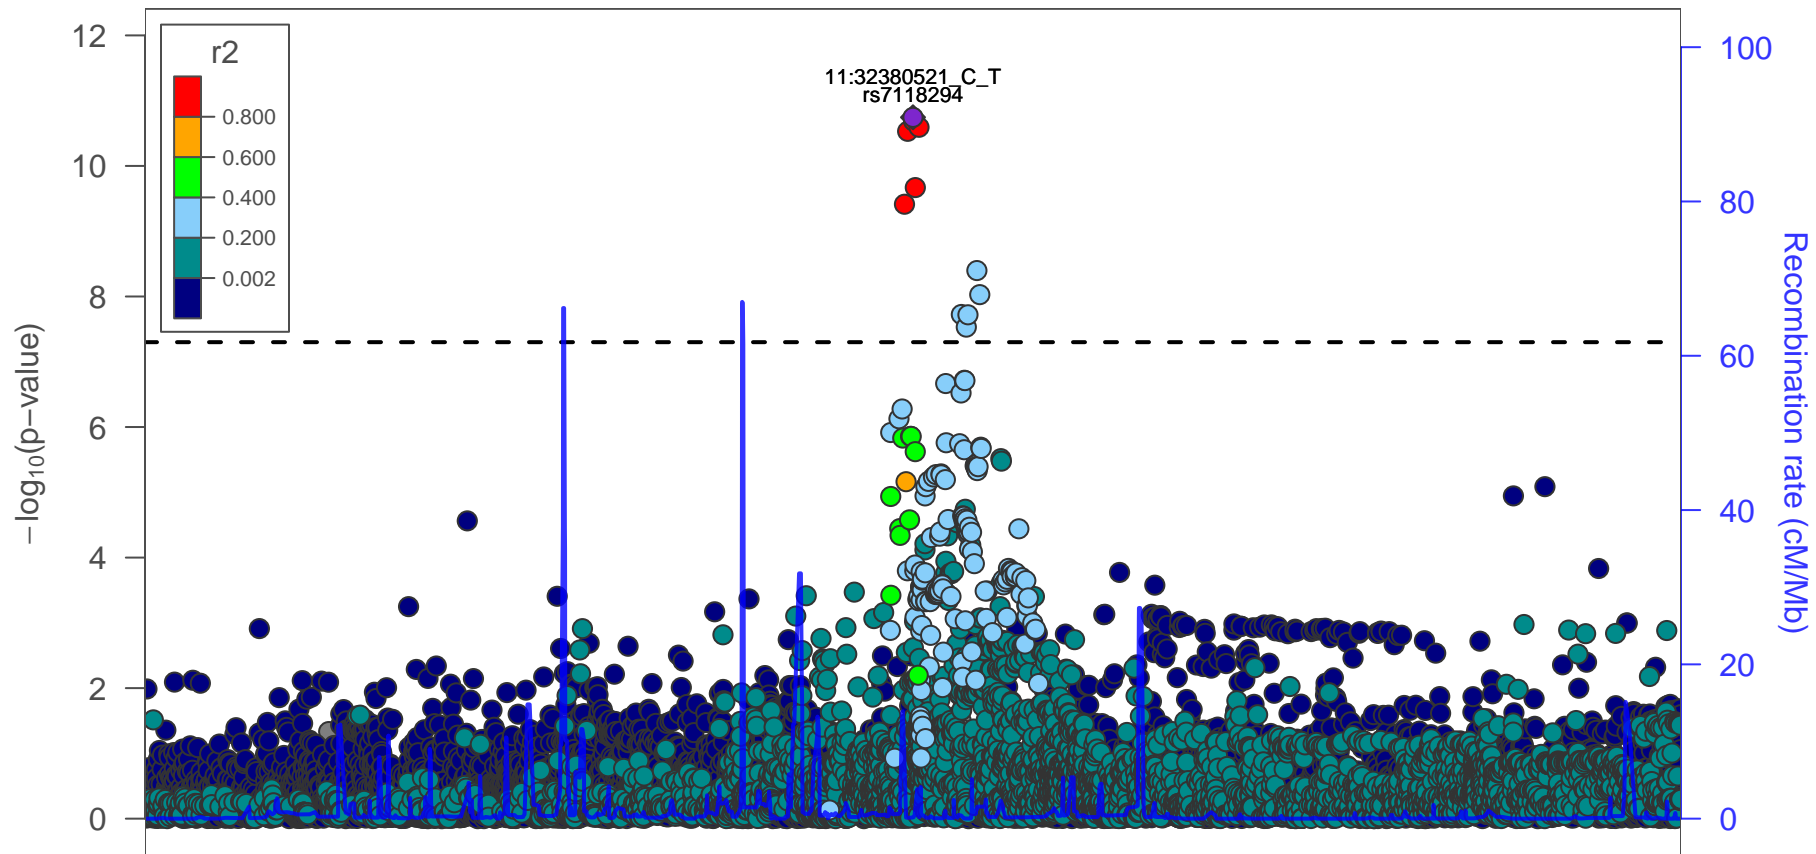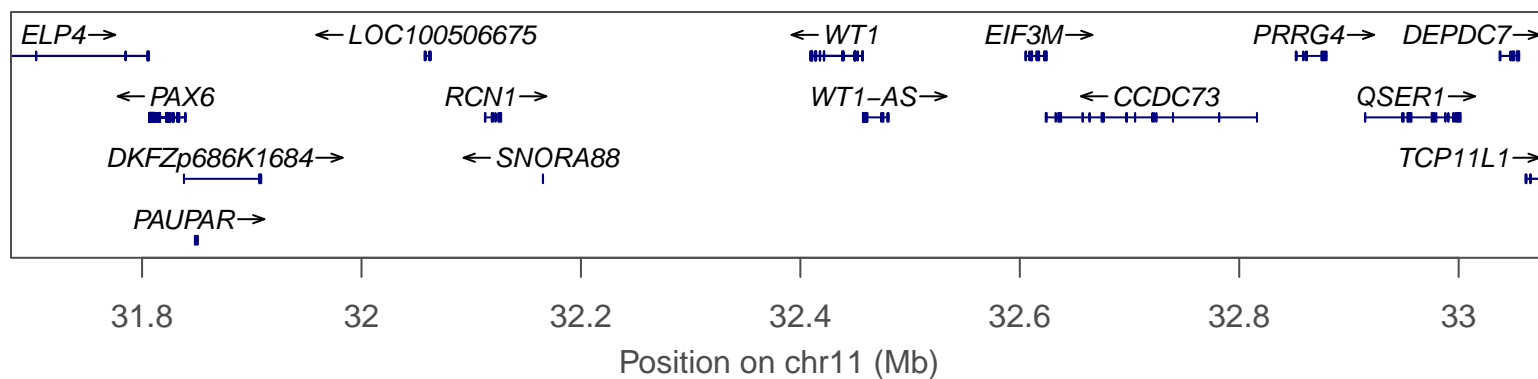



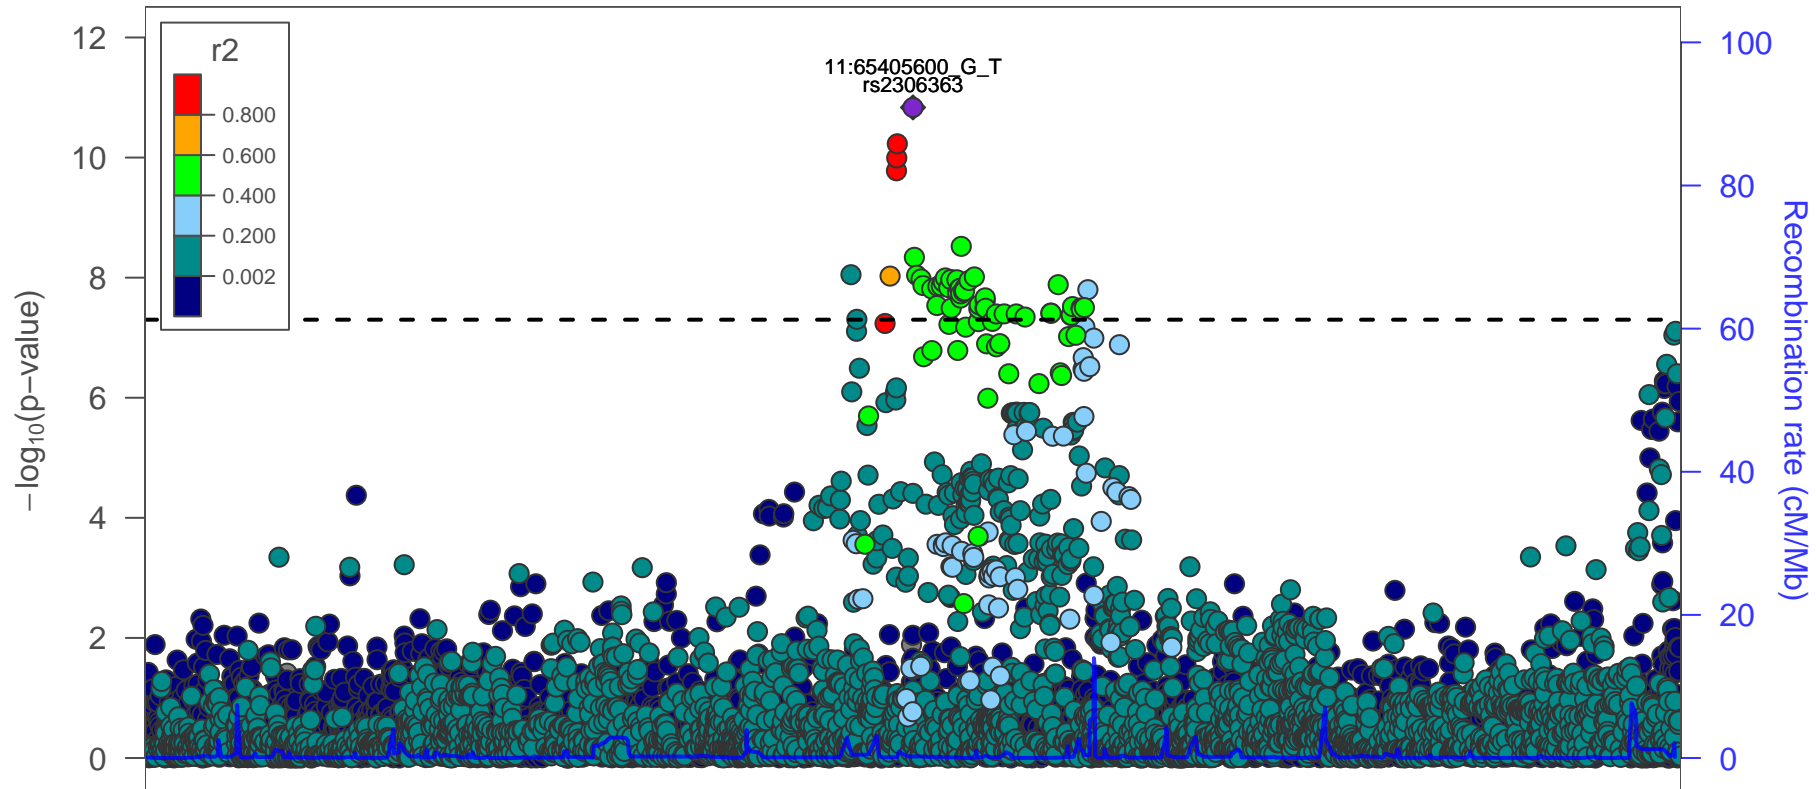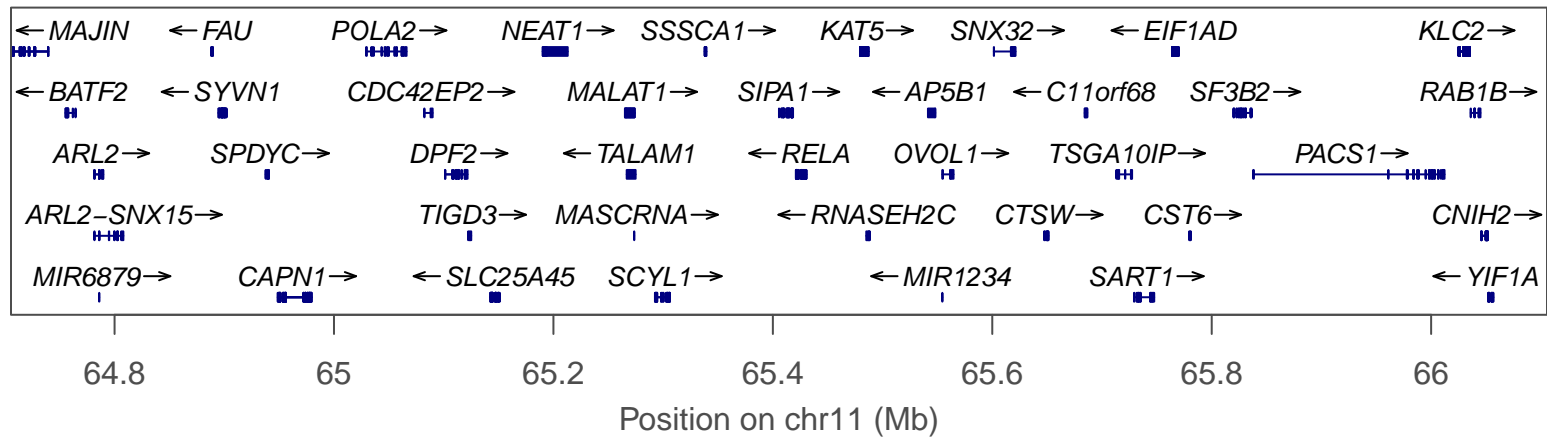

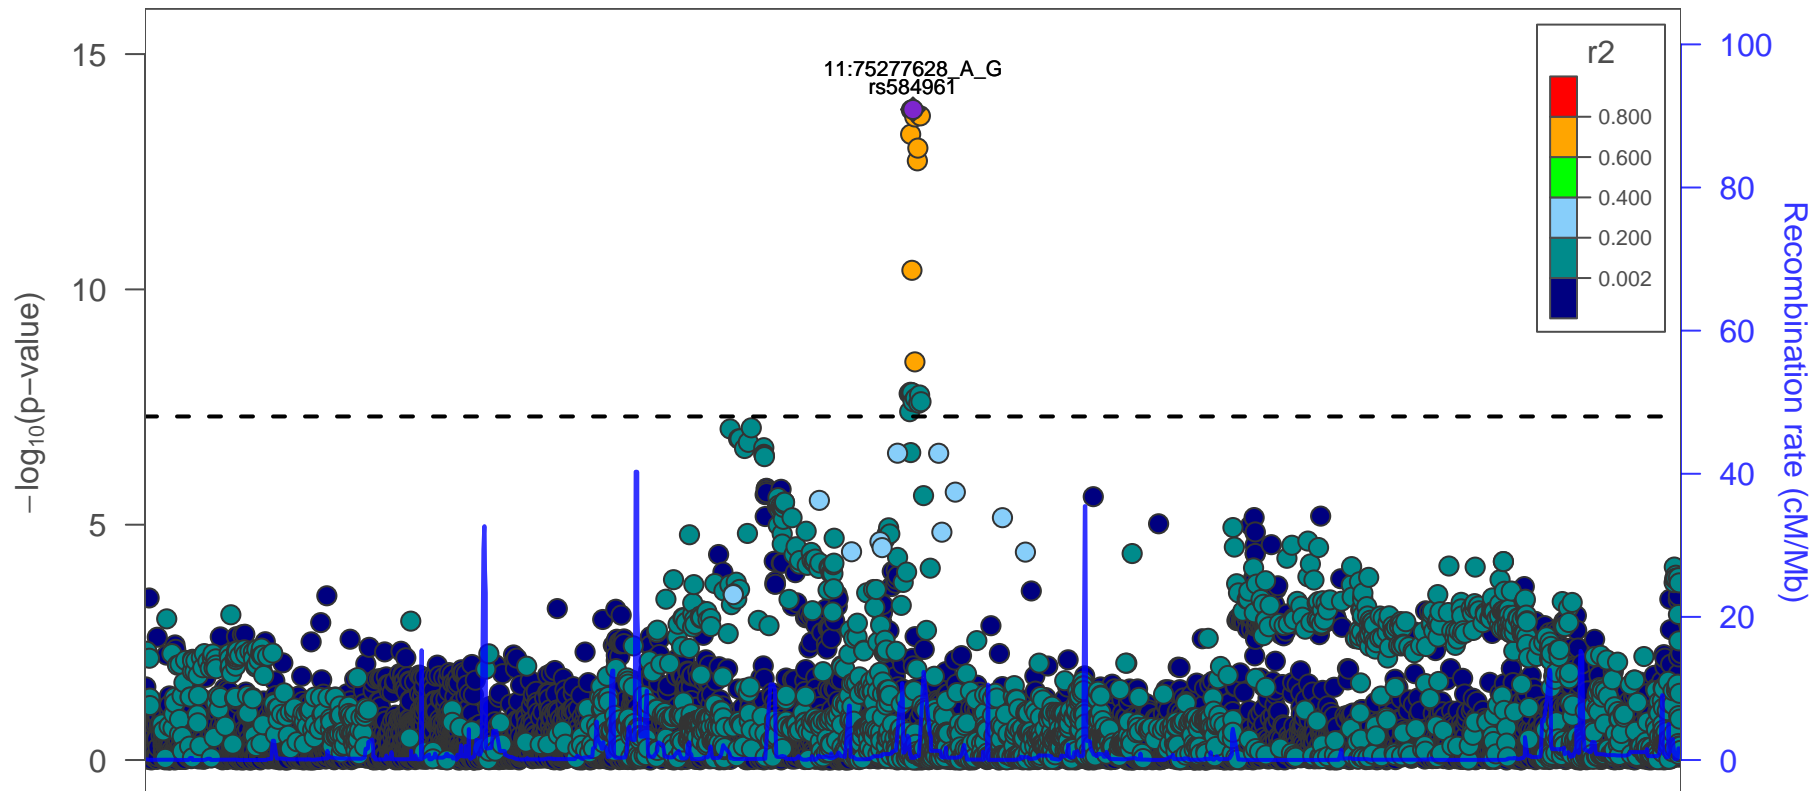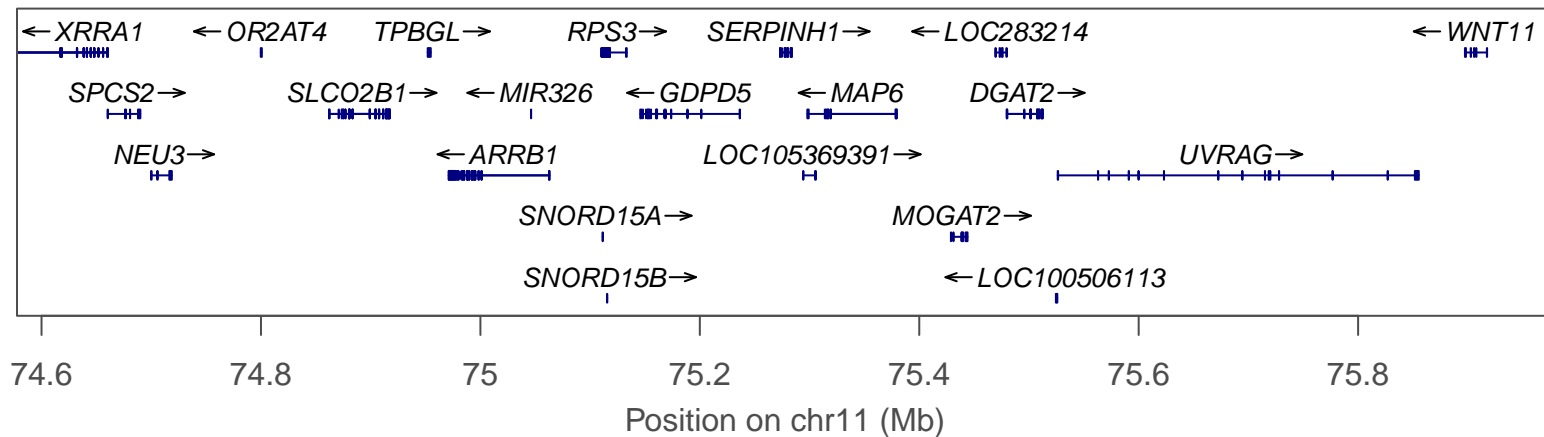

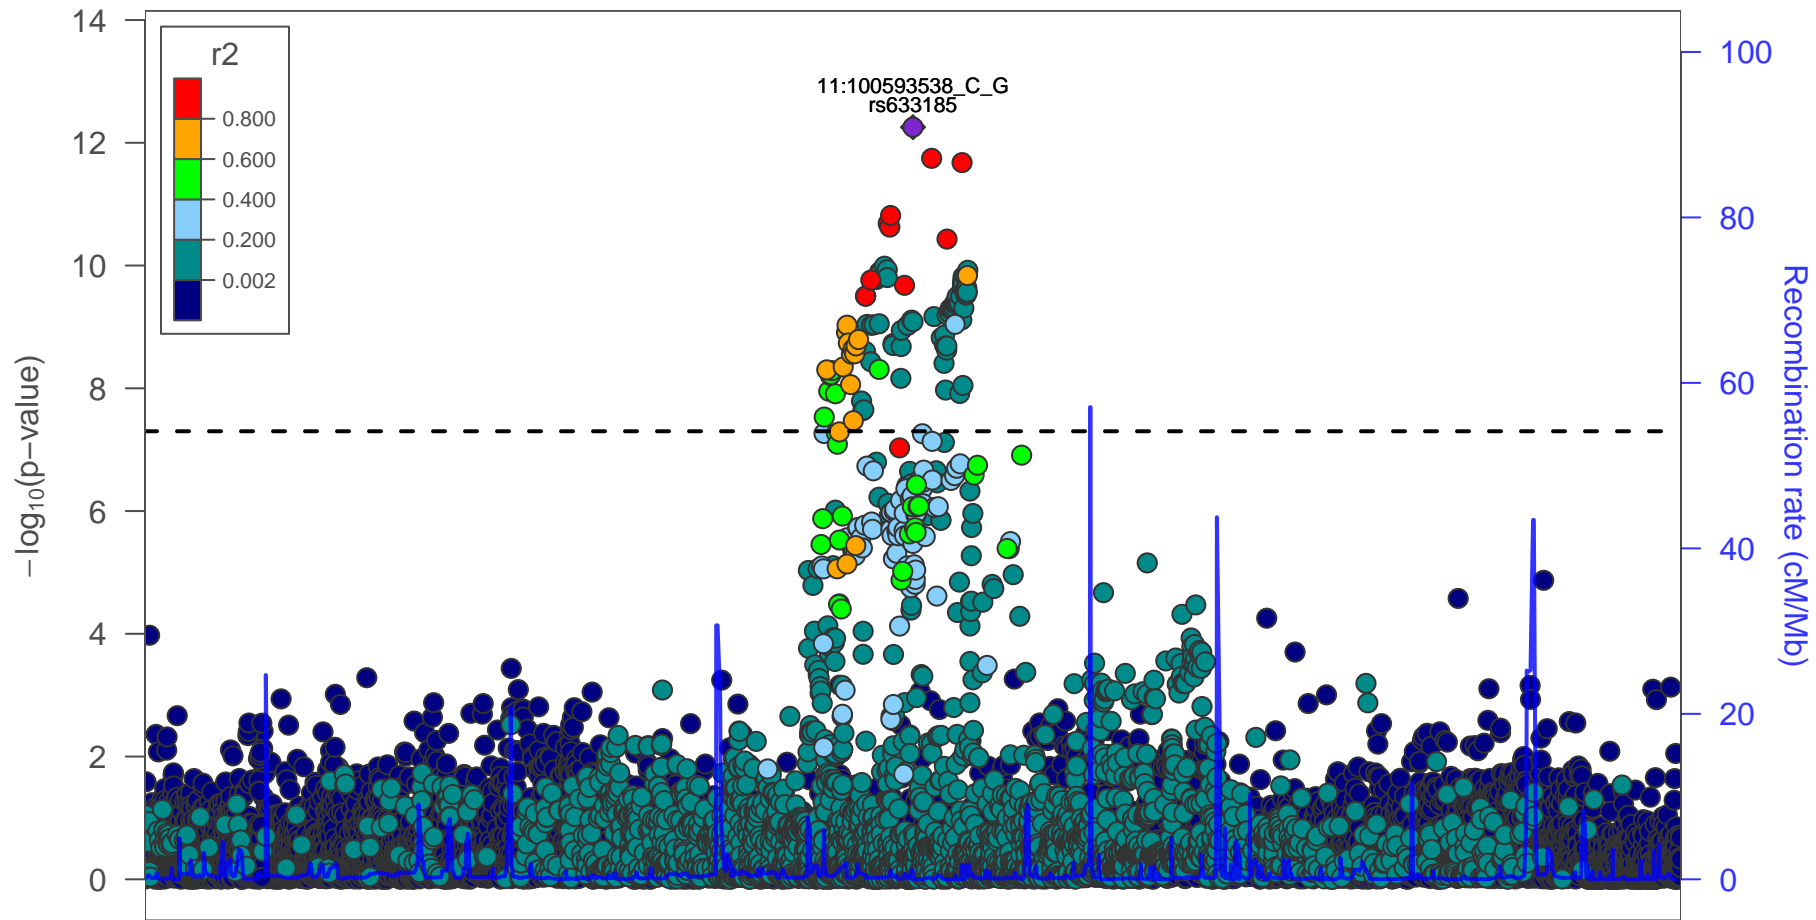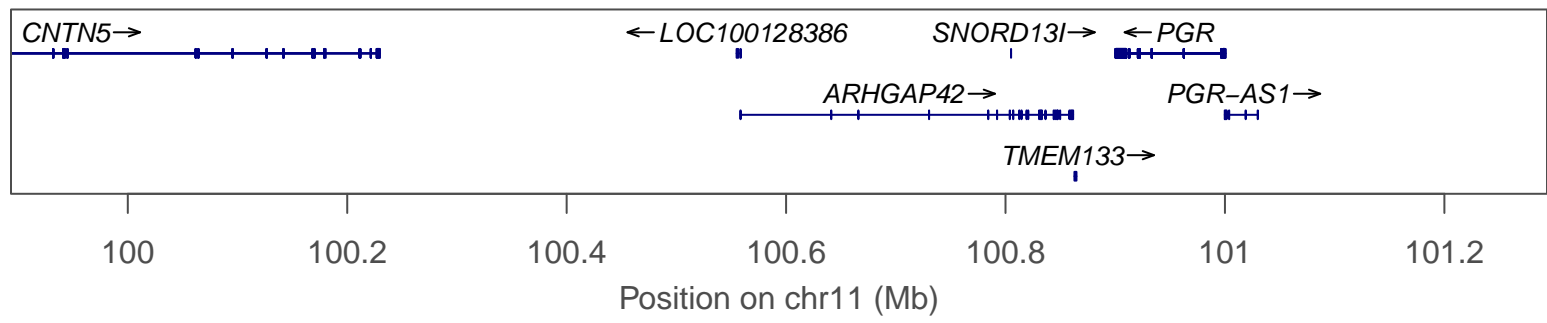

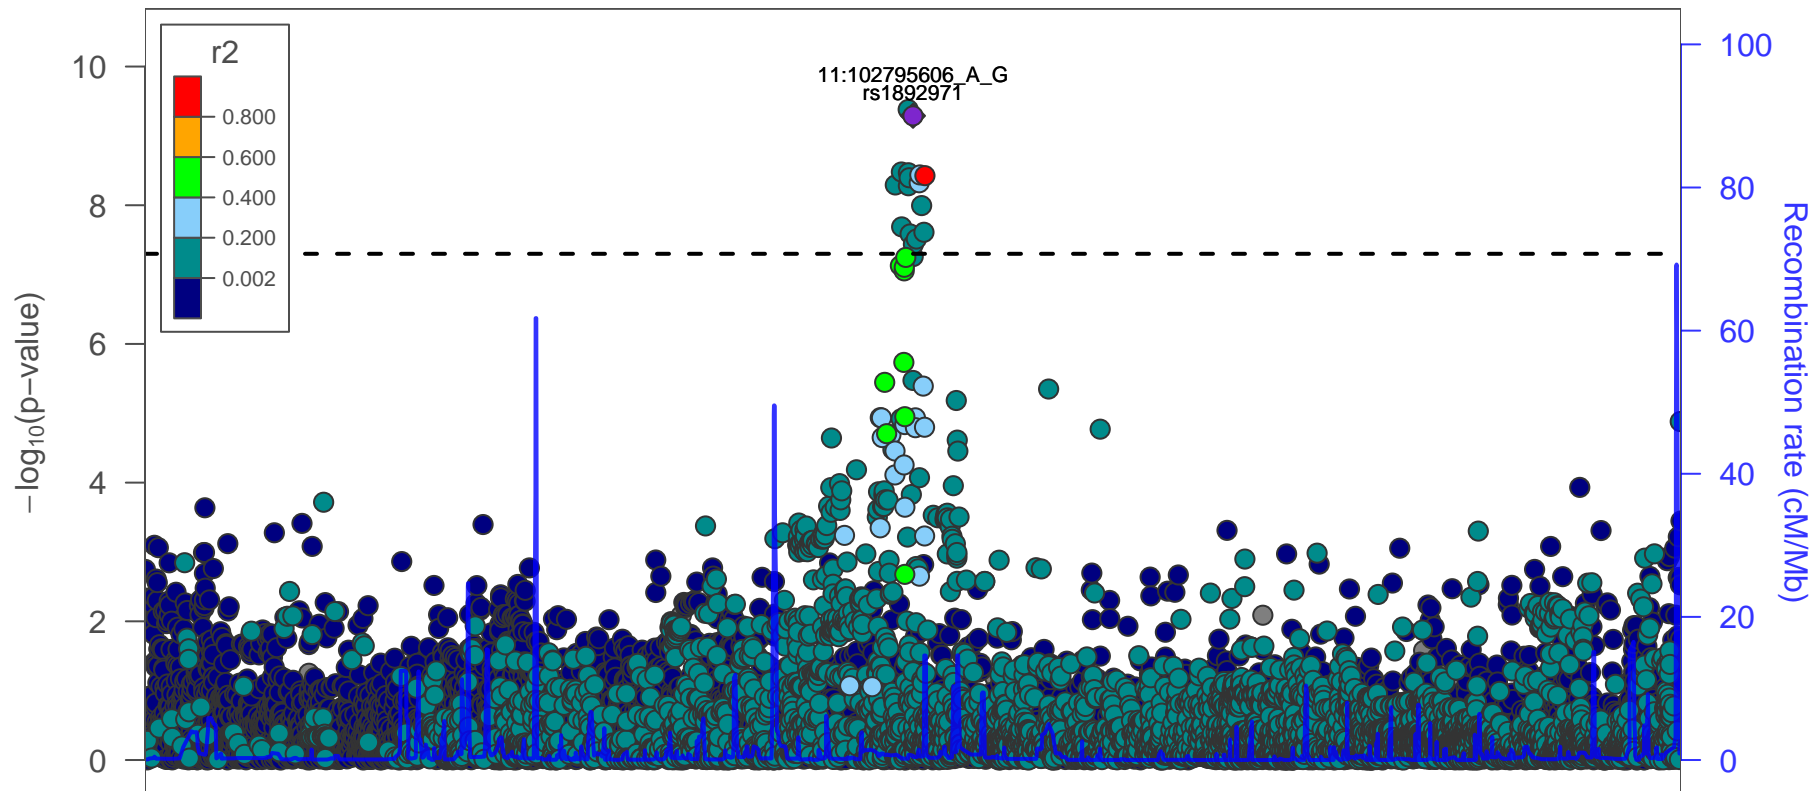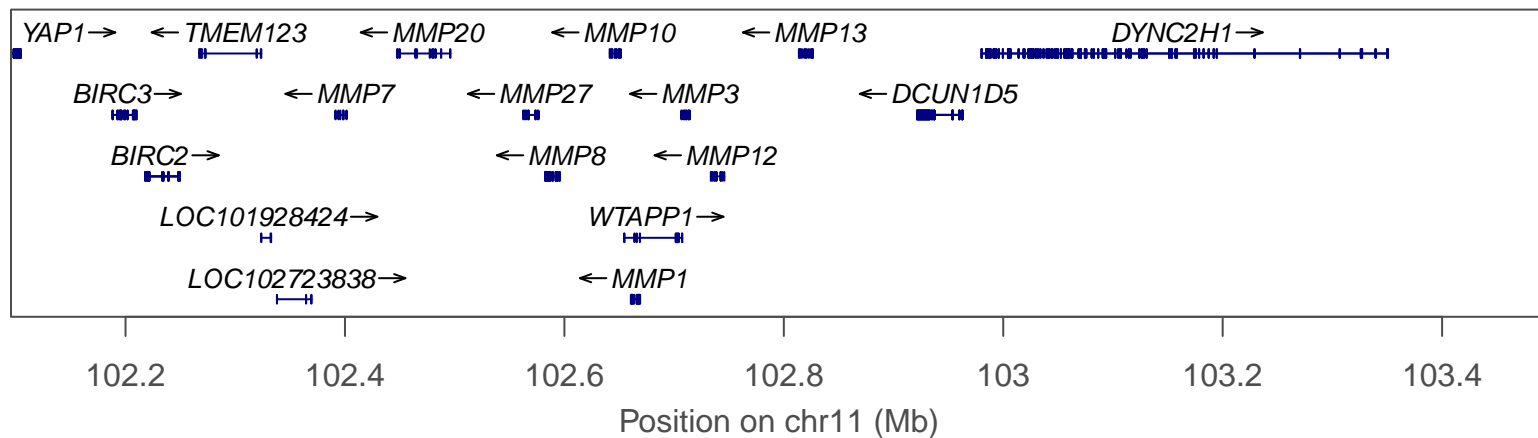

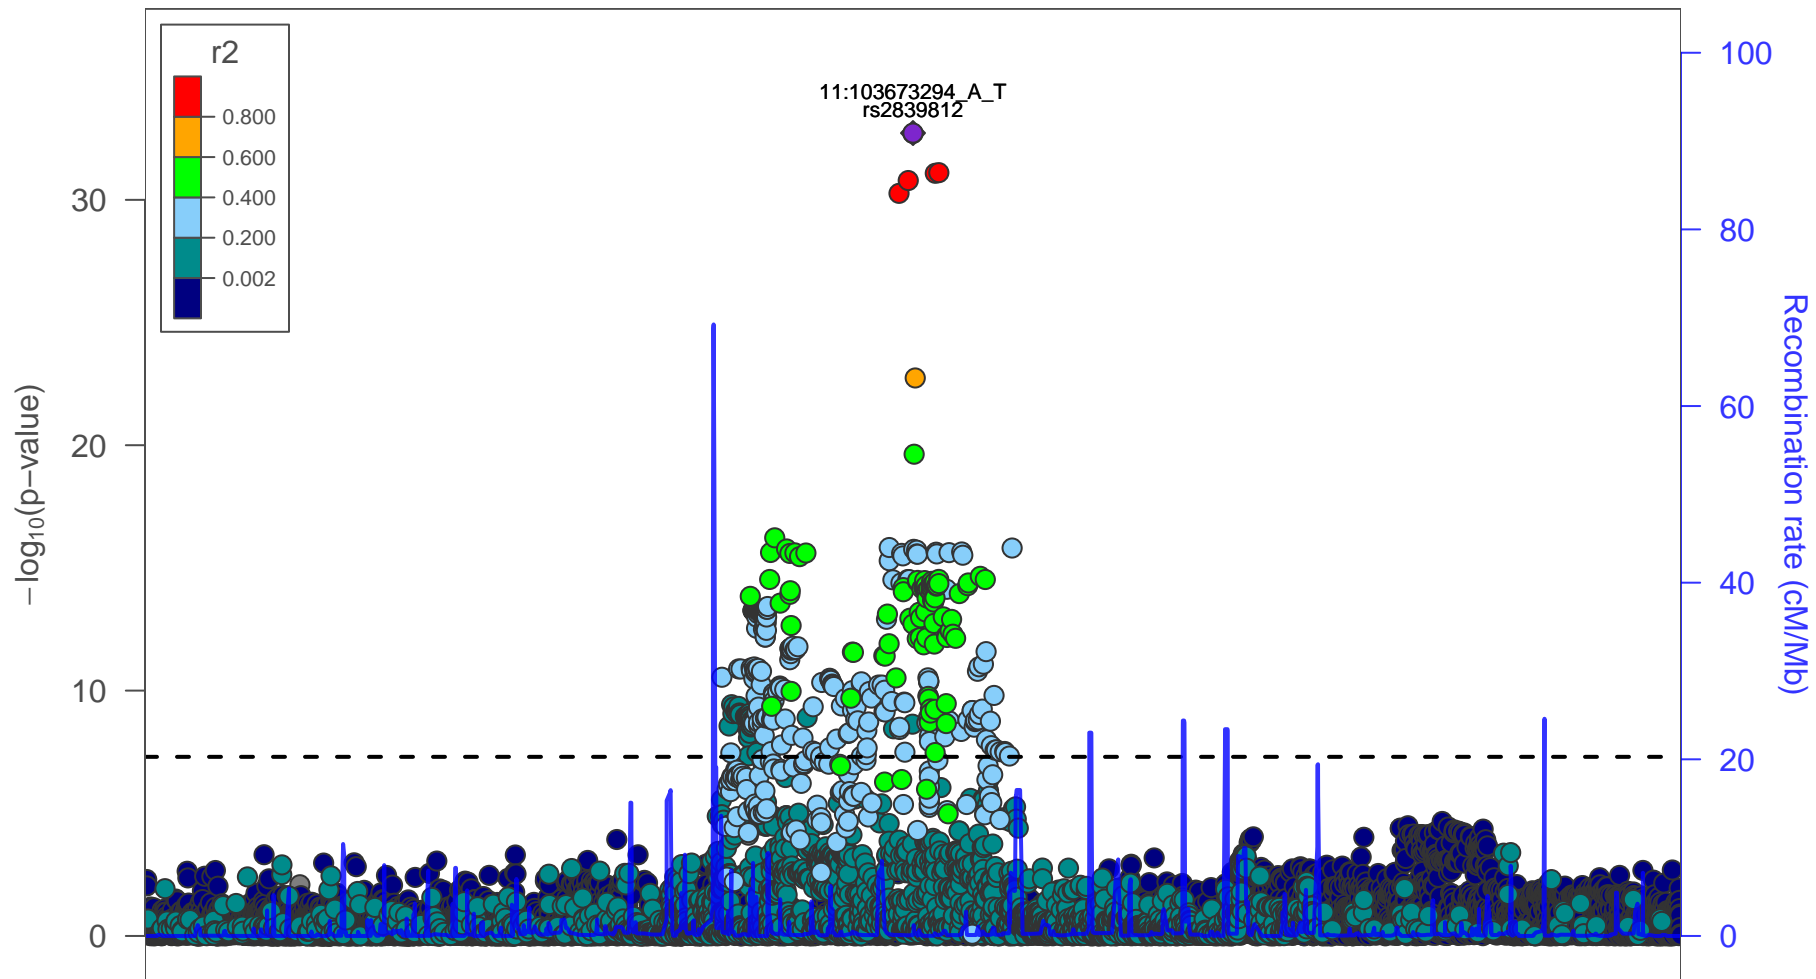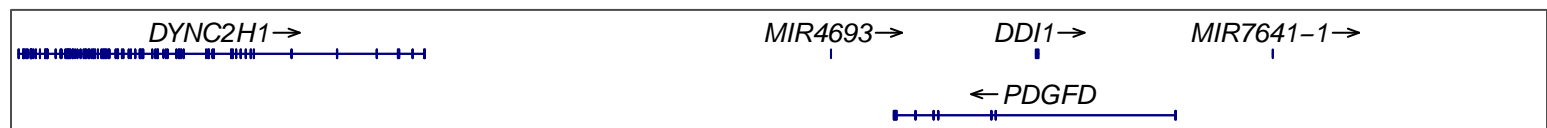

103      103.2      103.4      103.6      103.8      104      104.2

Position on chr11 (Mb)

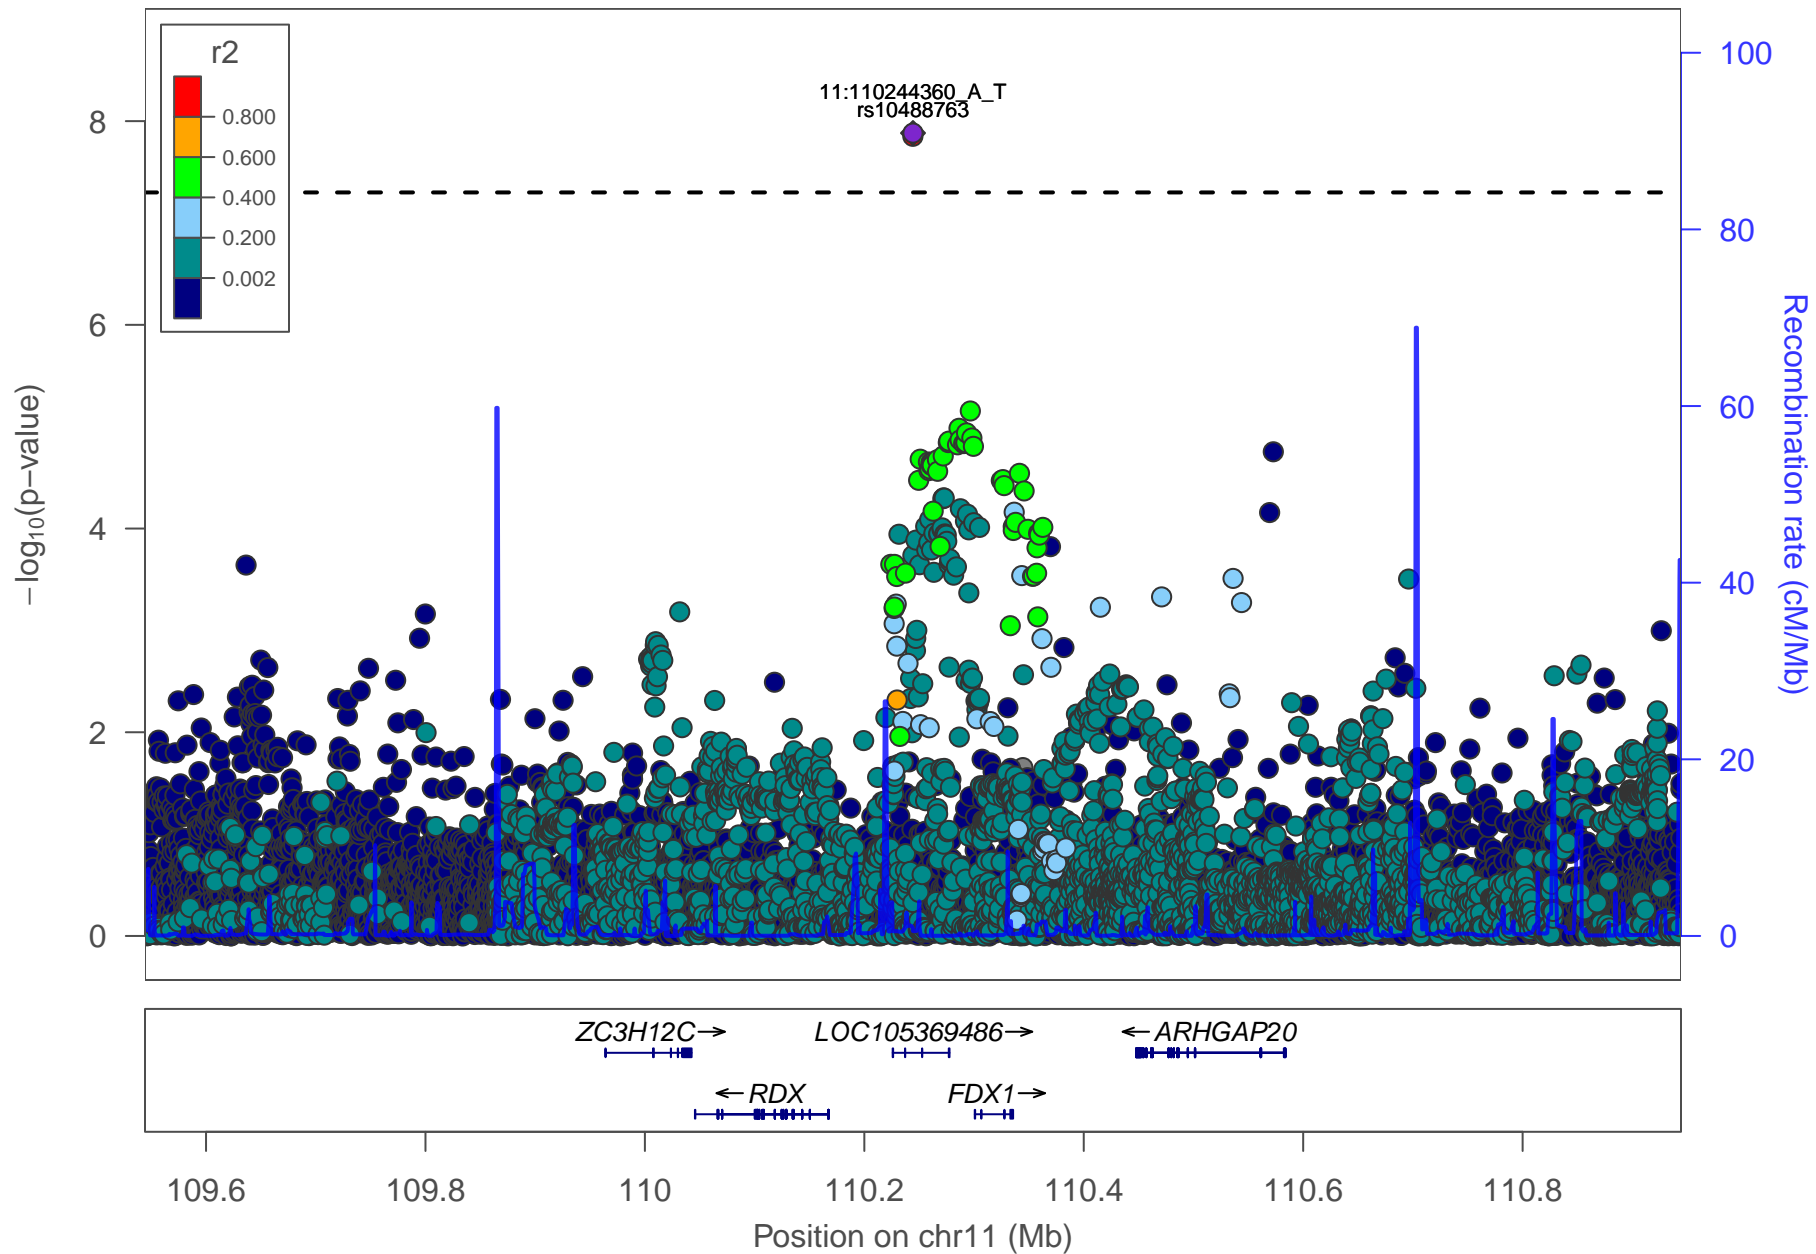

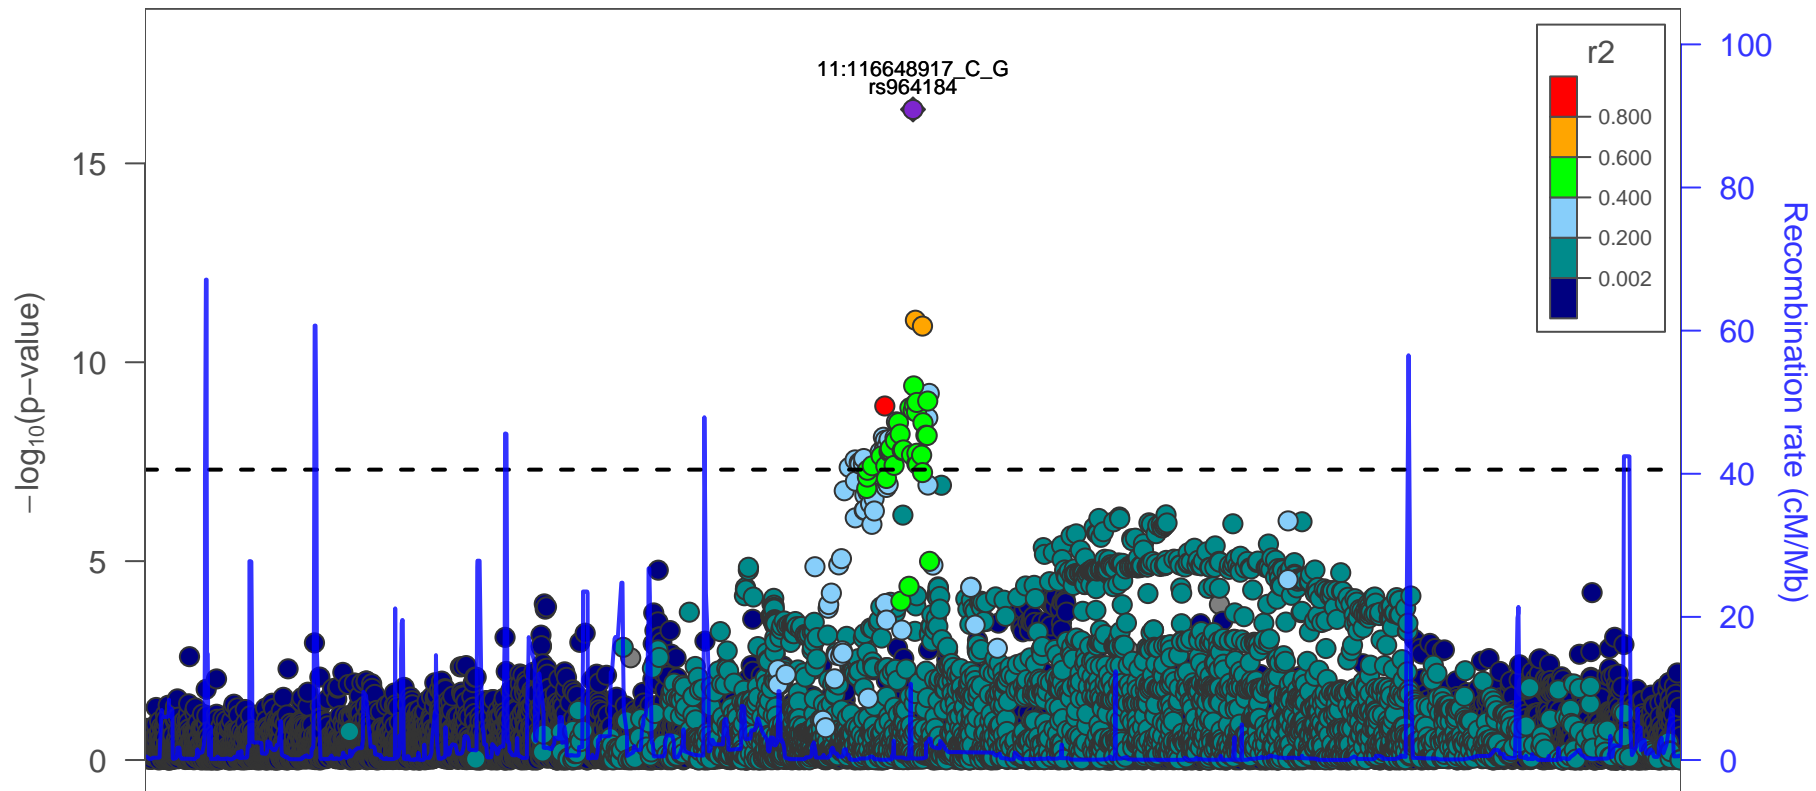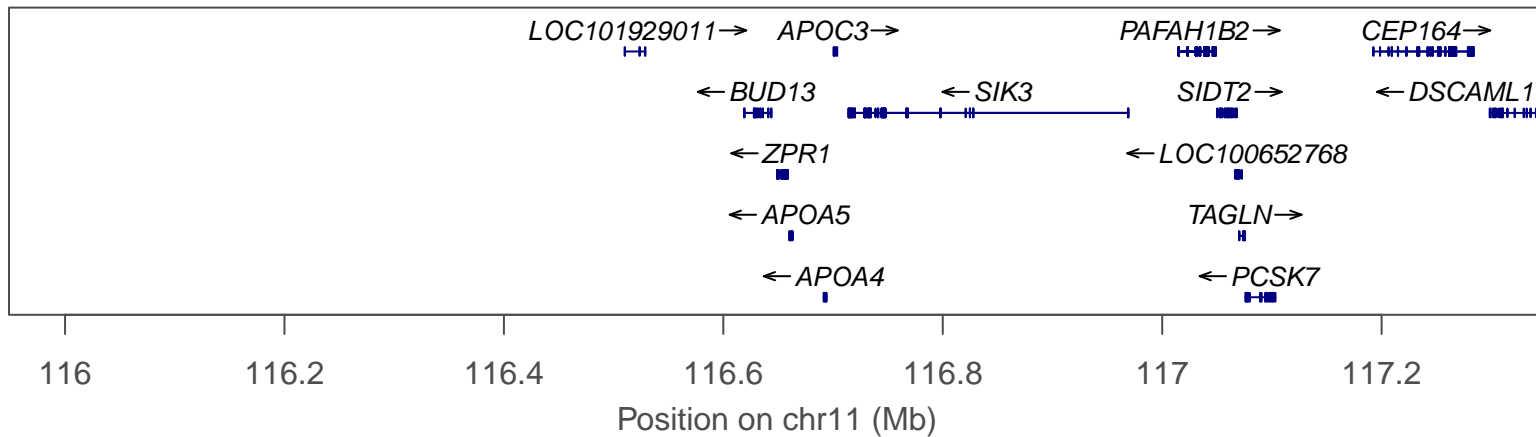

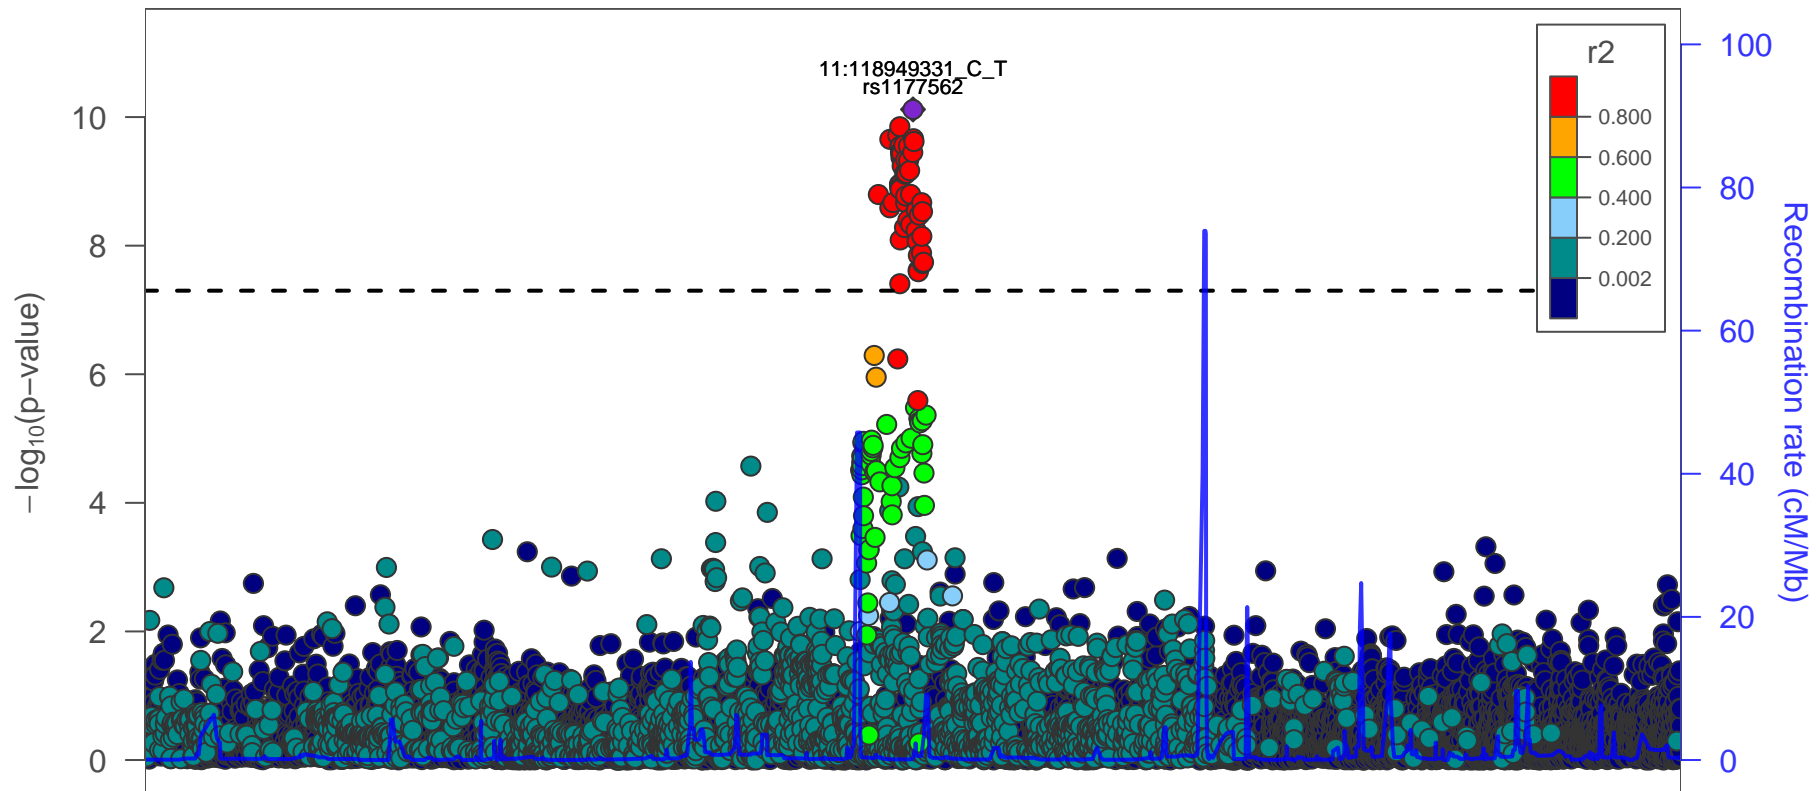

11:118949331\_C\_T  
rs1177562

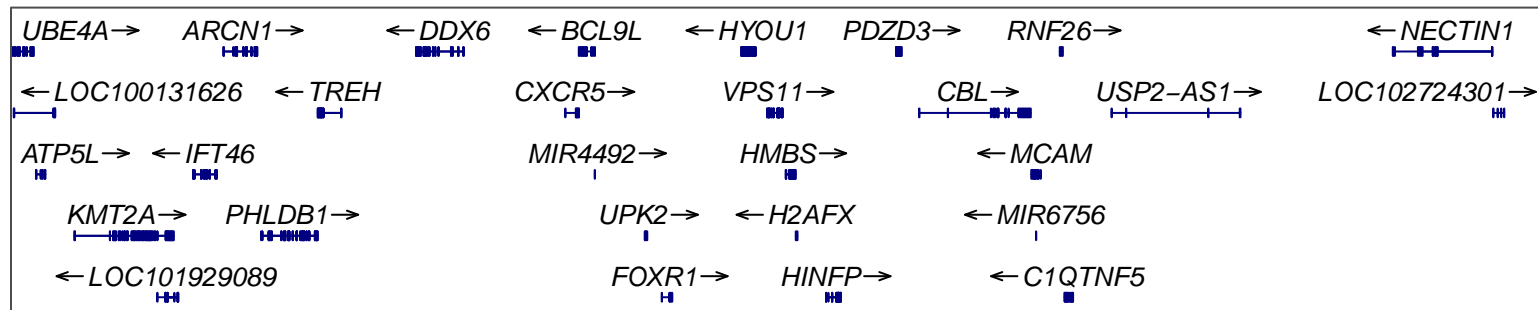

118.4 118.6 118.8 119 119.2 119.4 119.6

Position on chr11 (Mb)



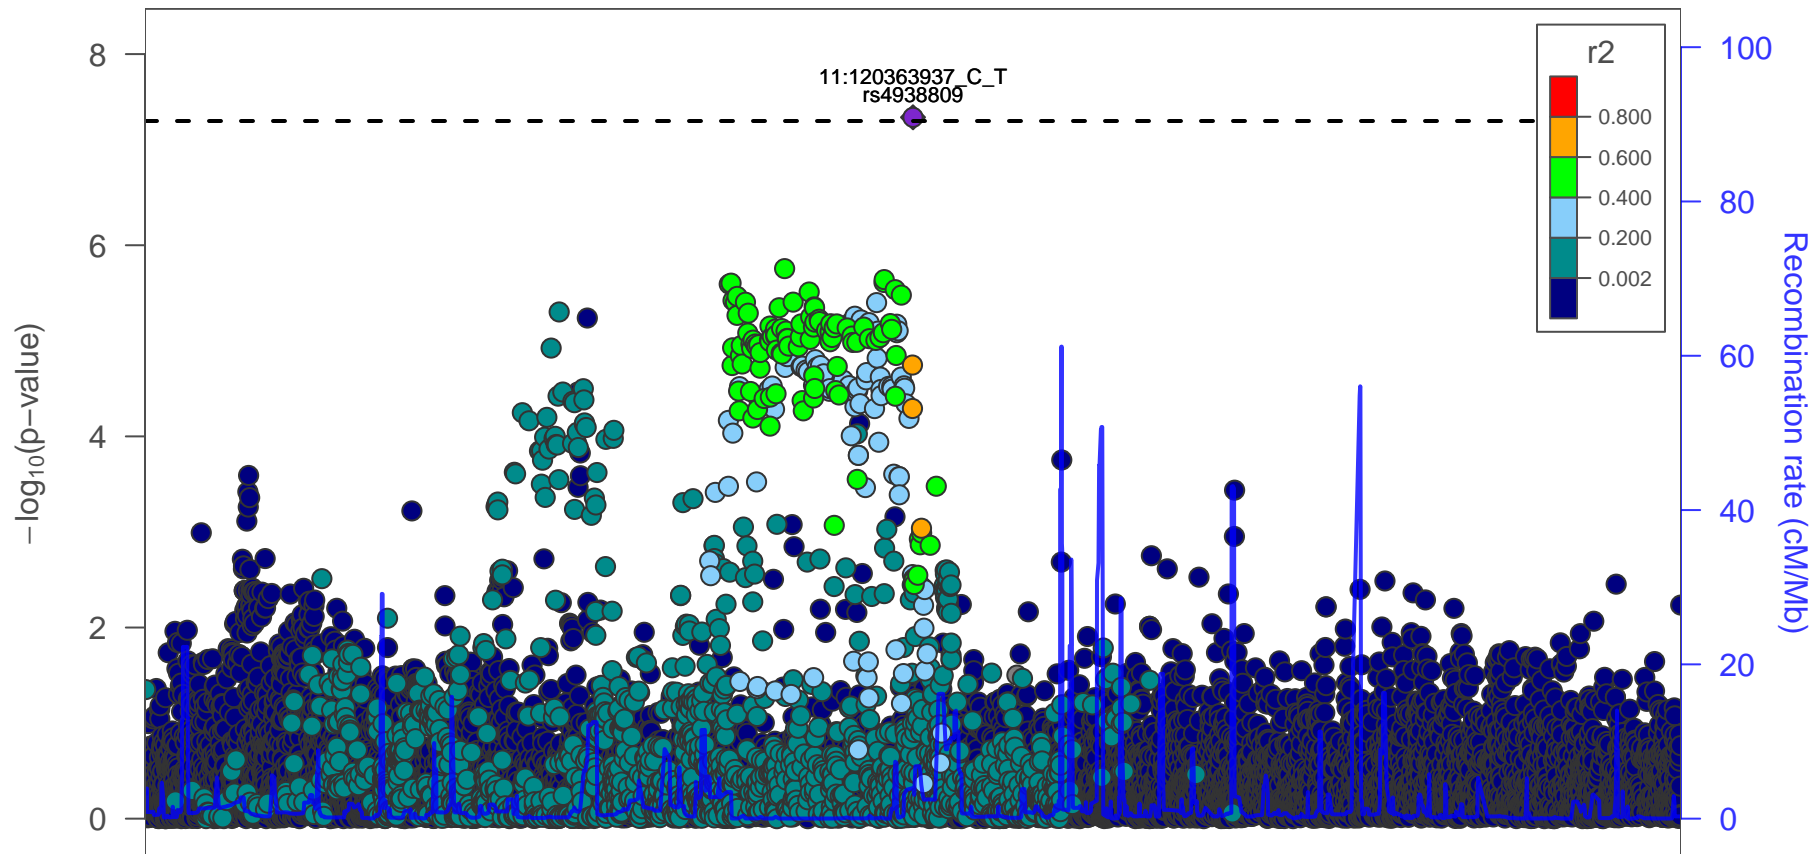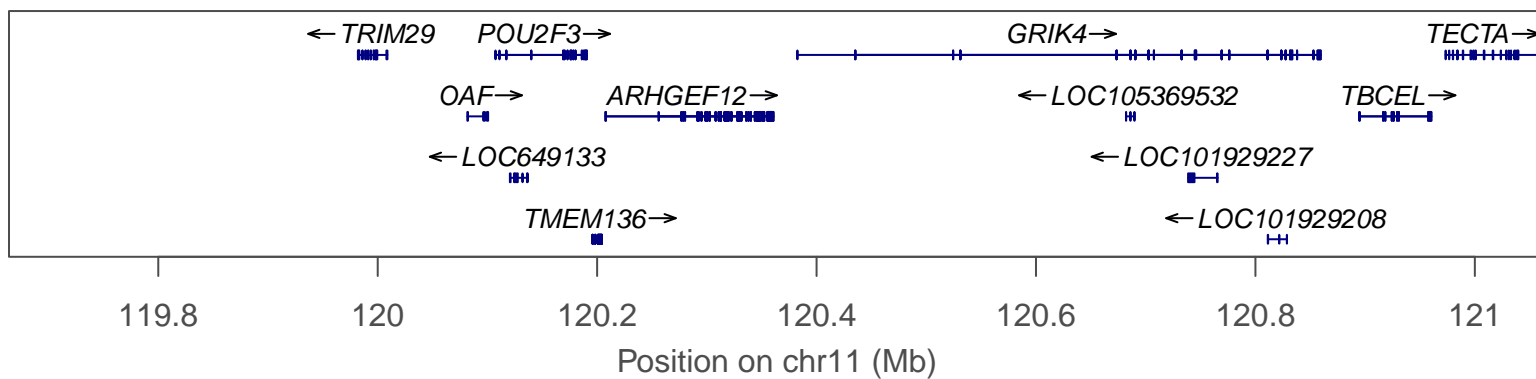

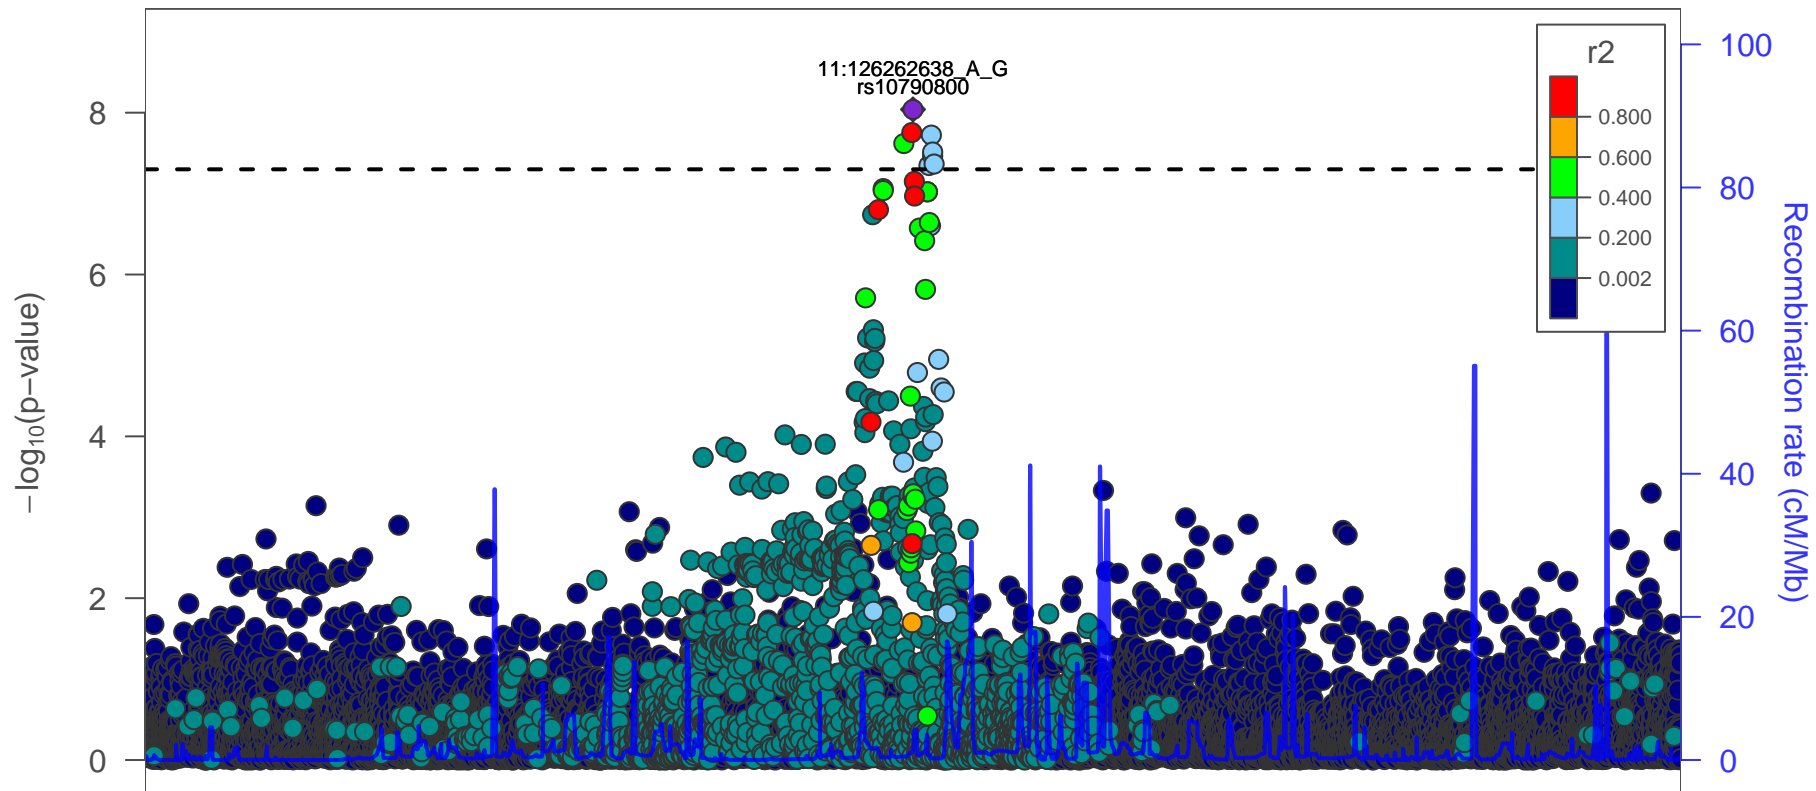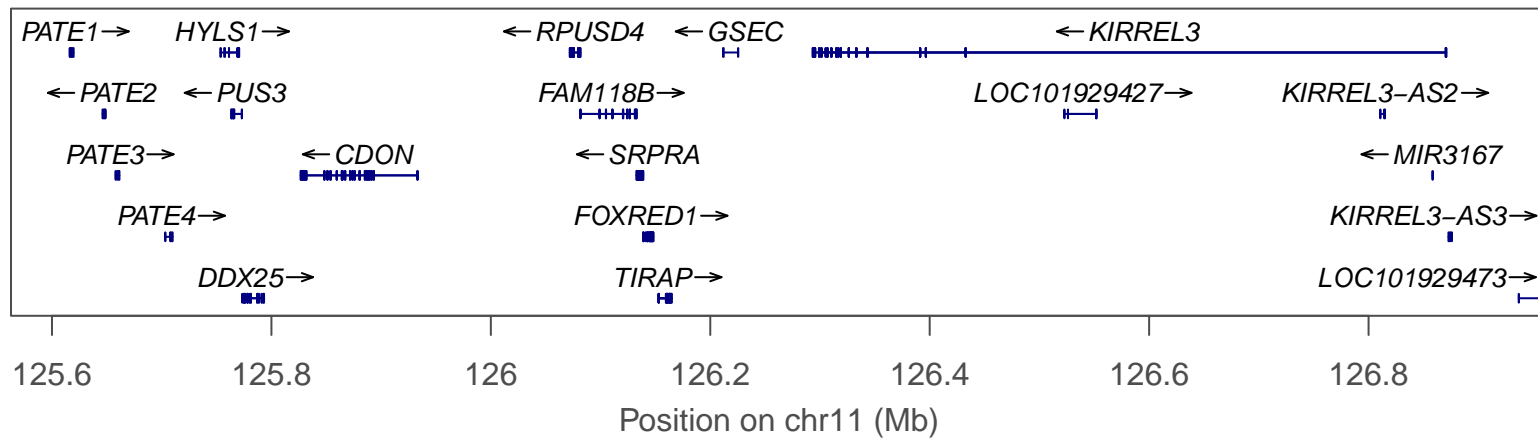

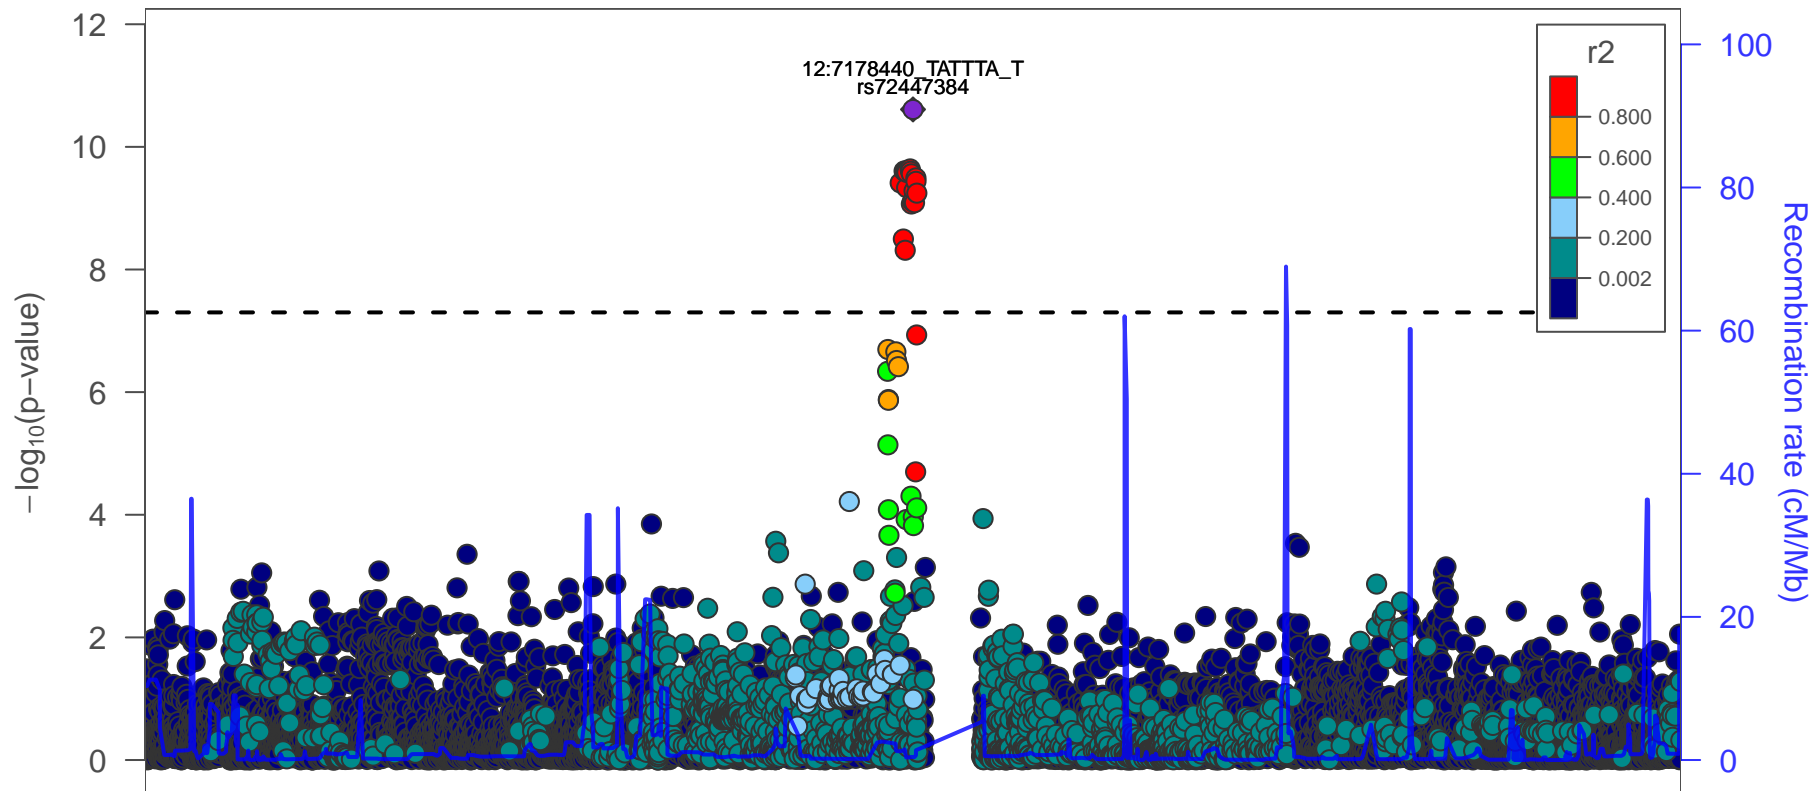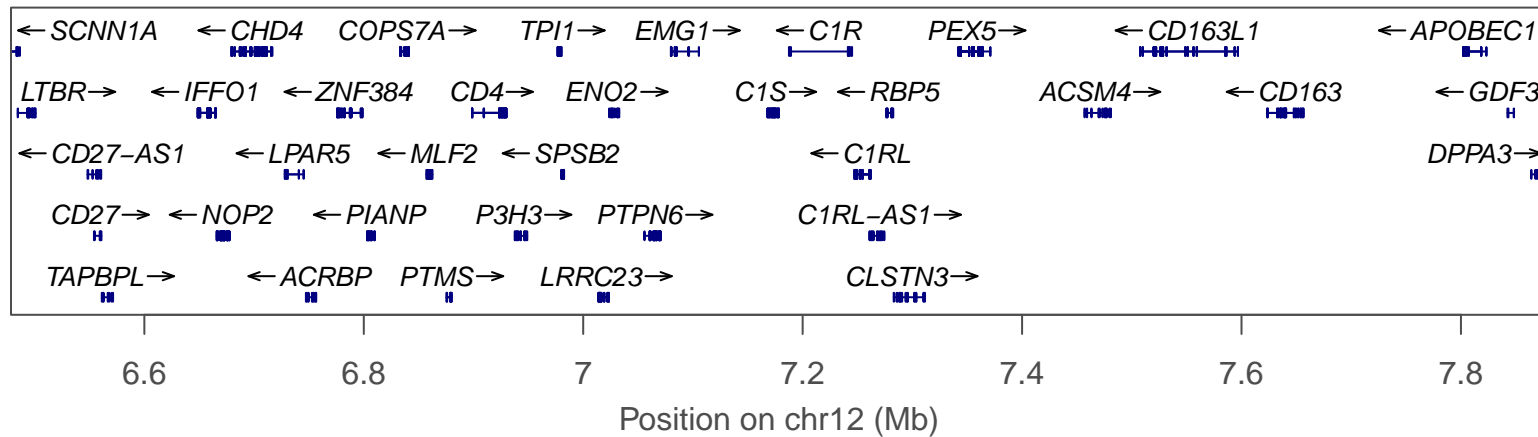

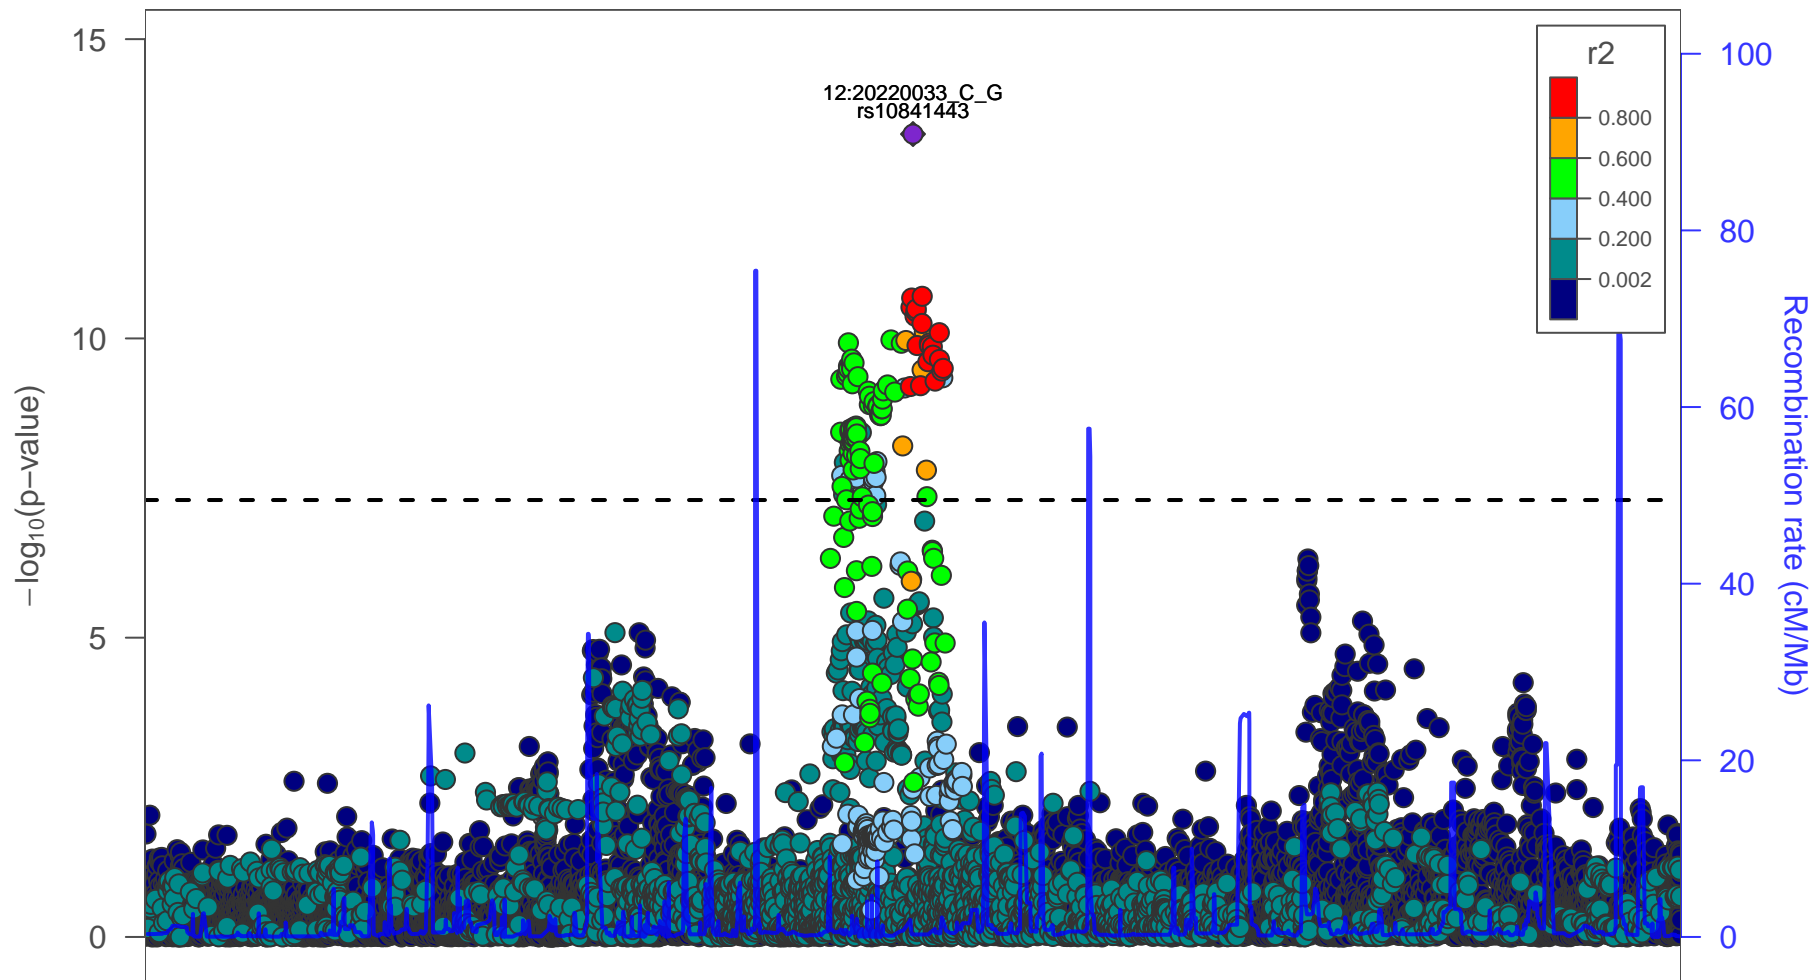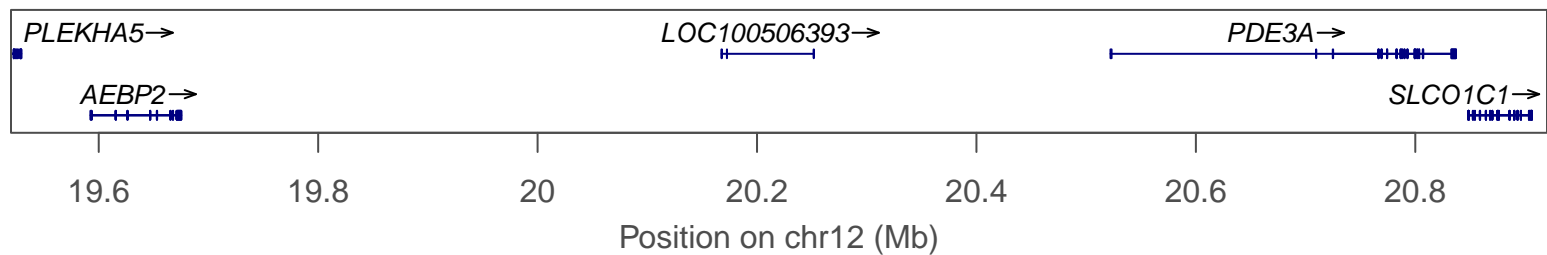

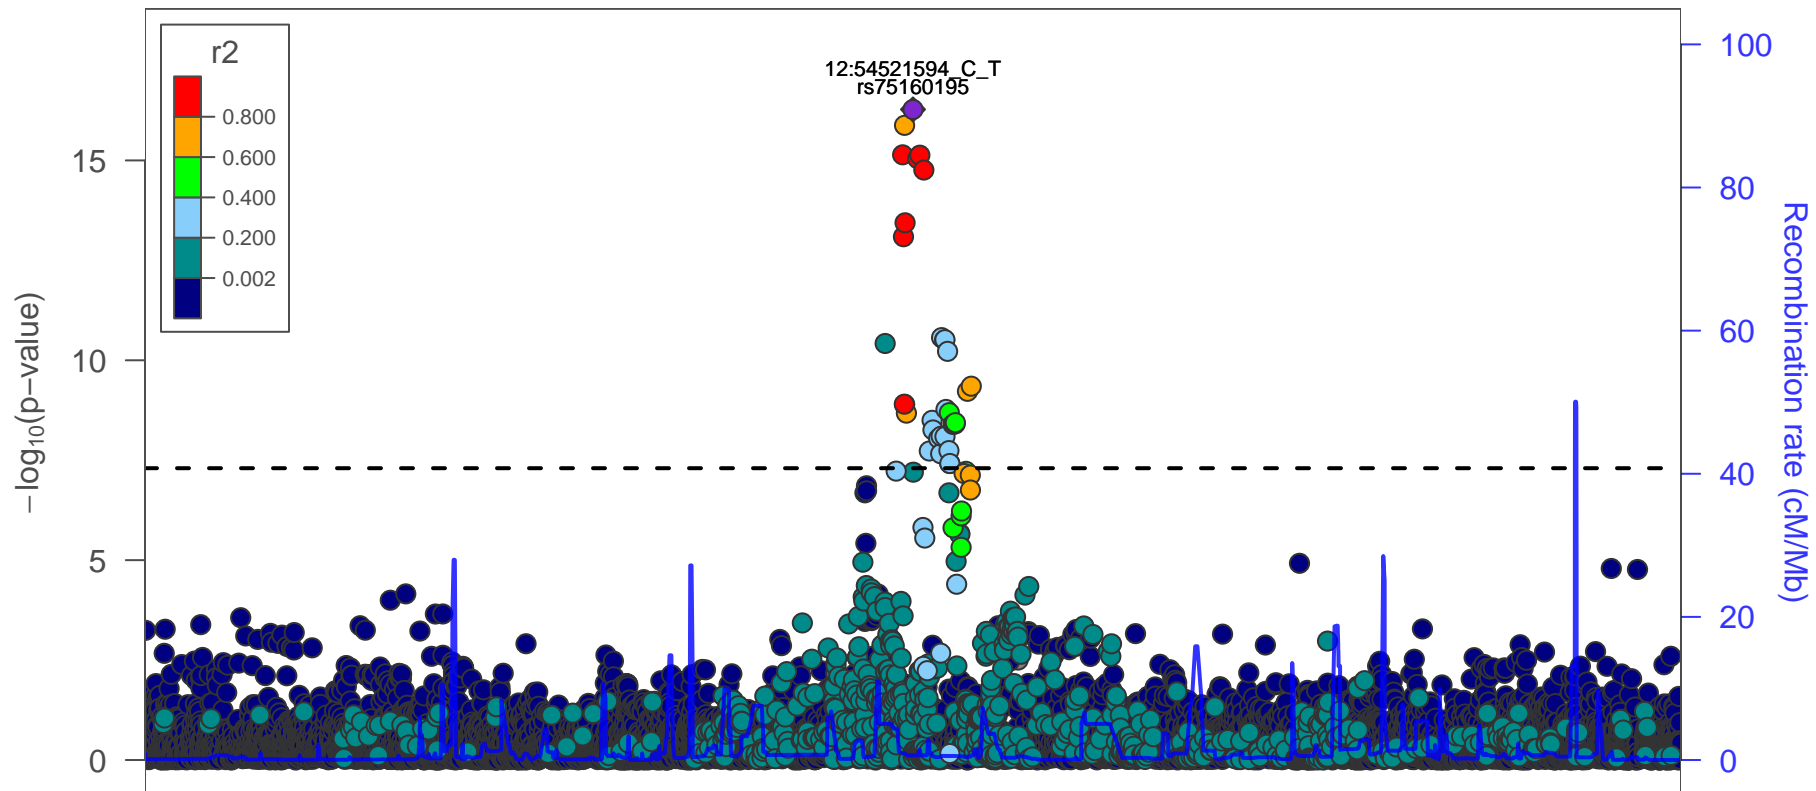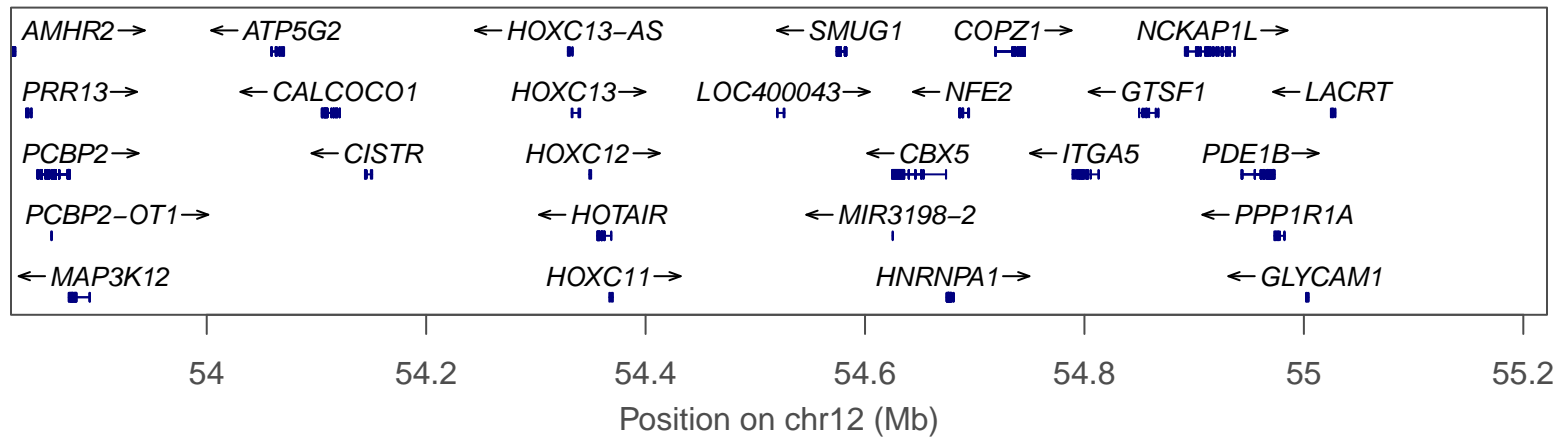

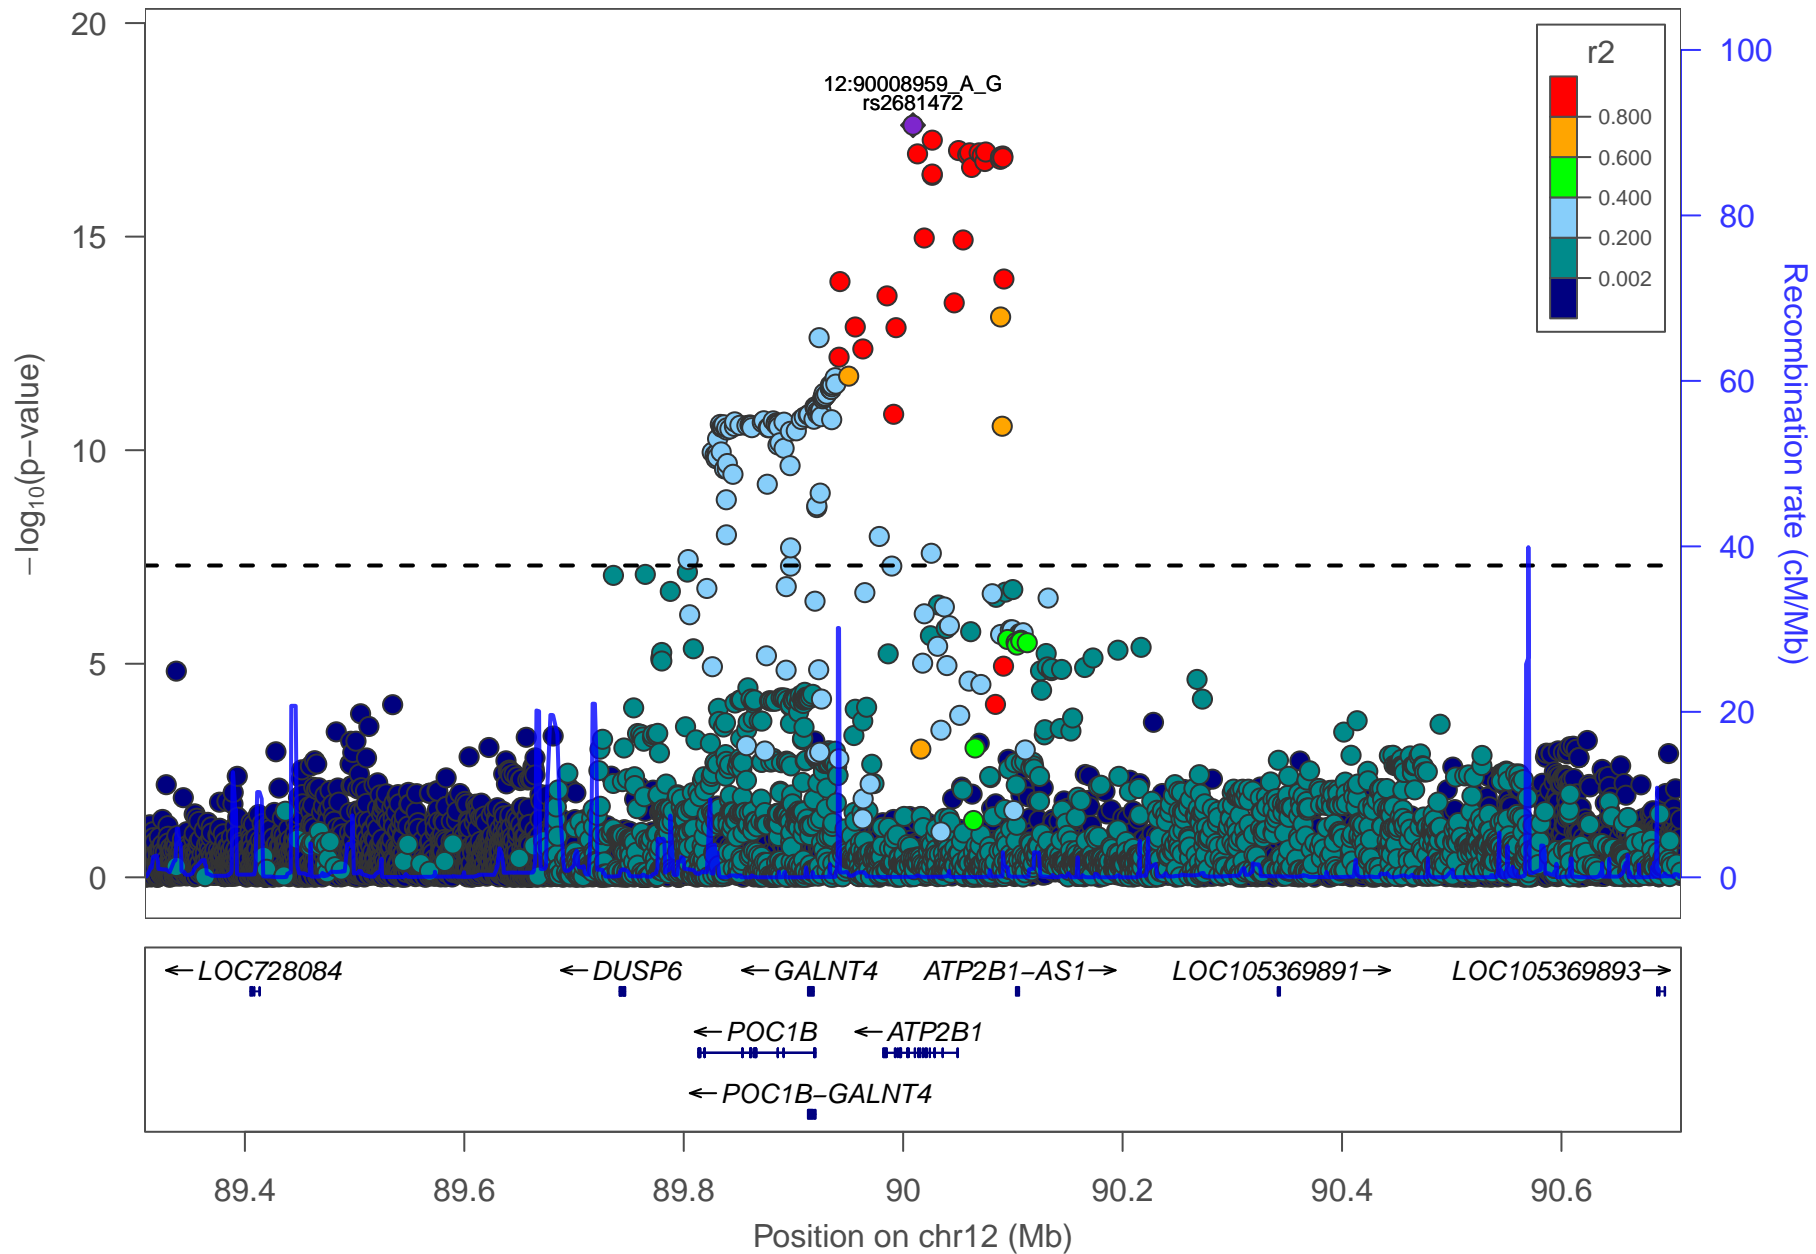

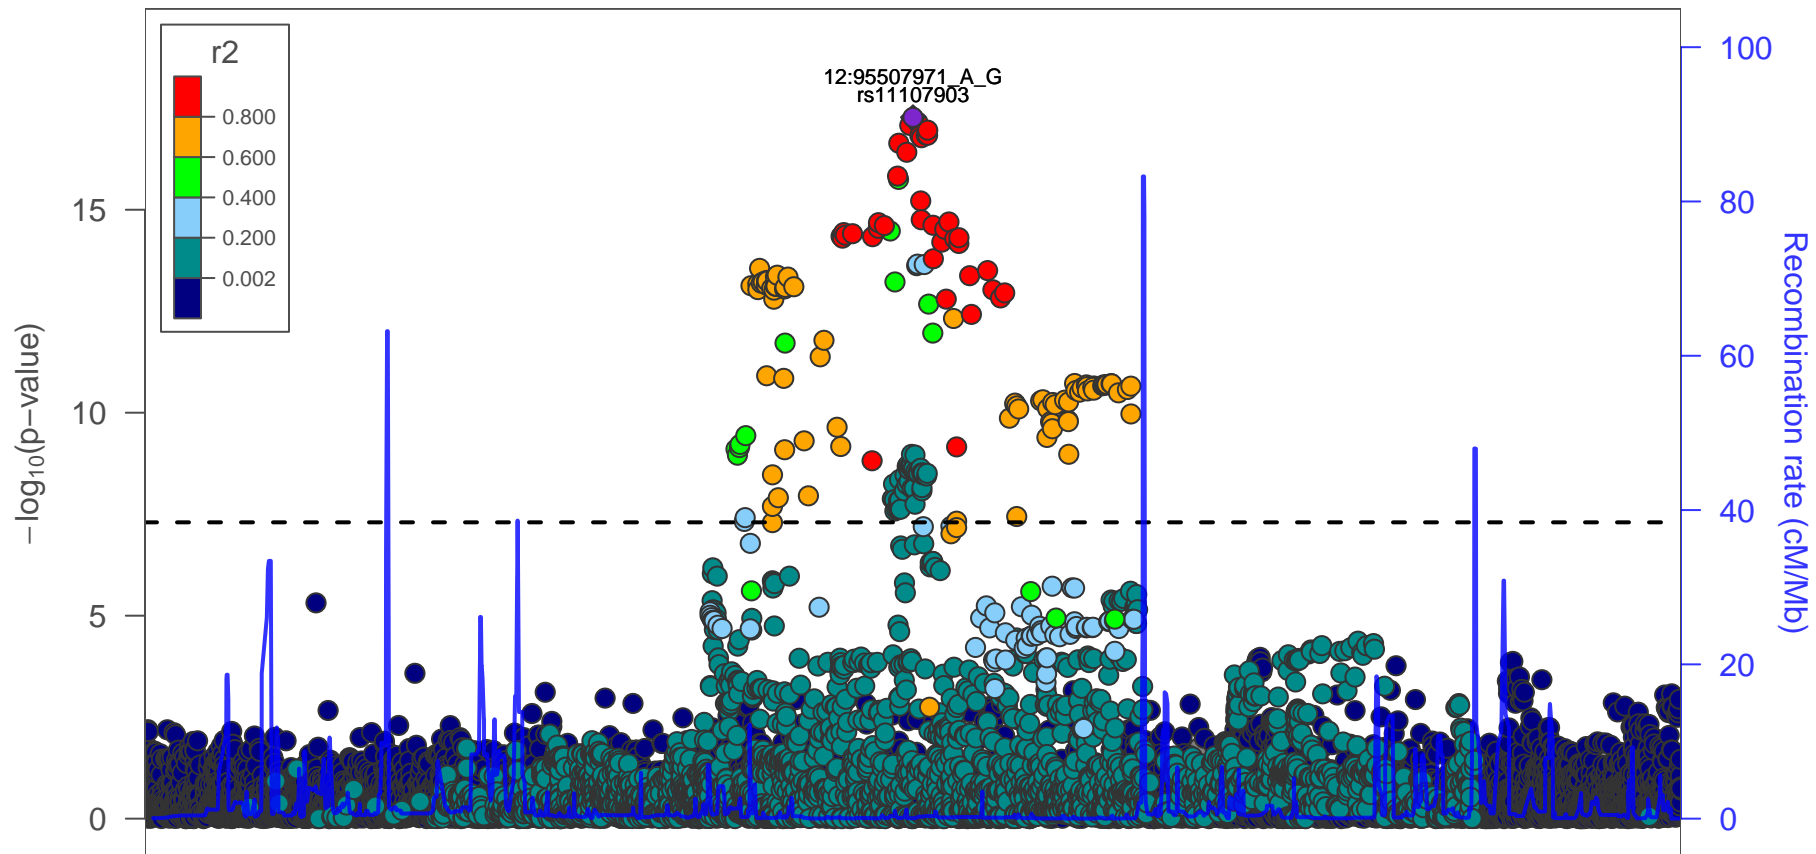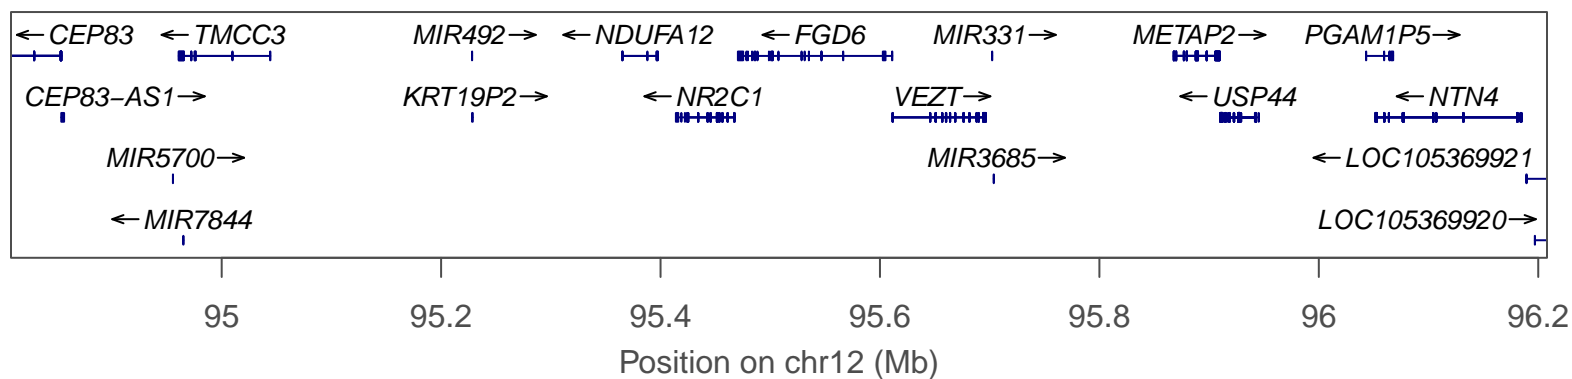

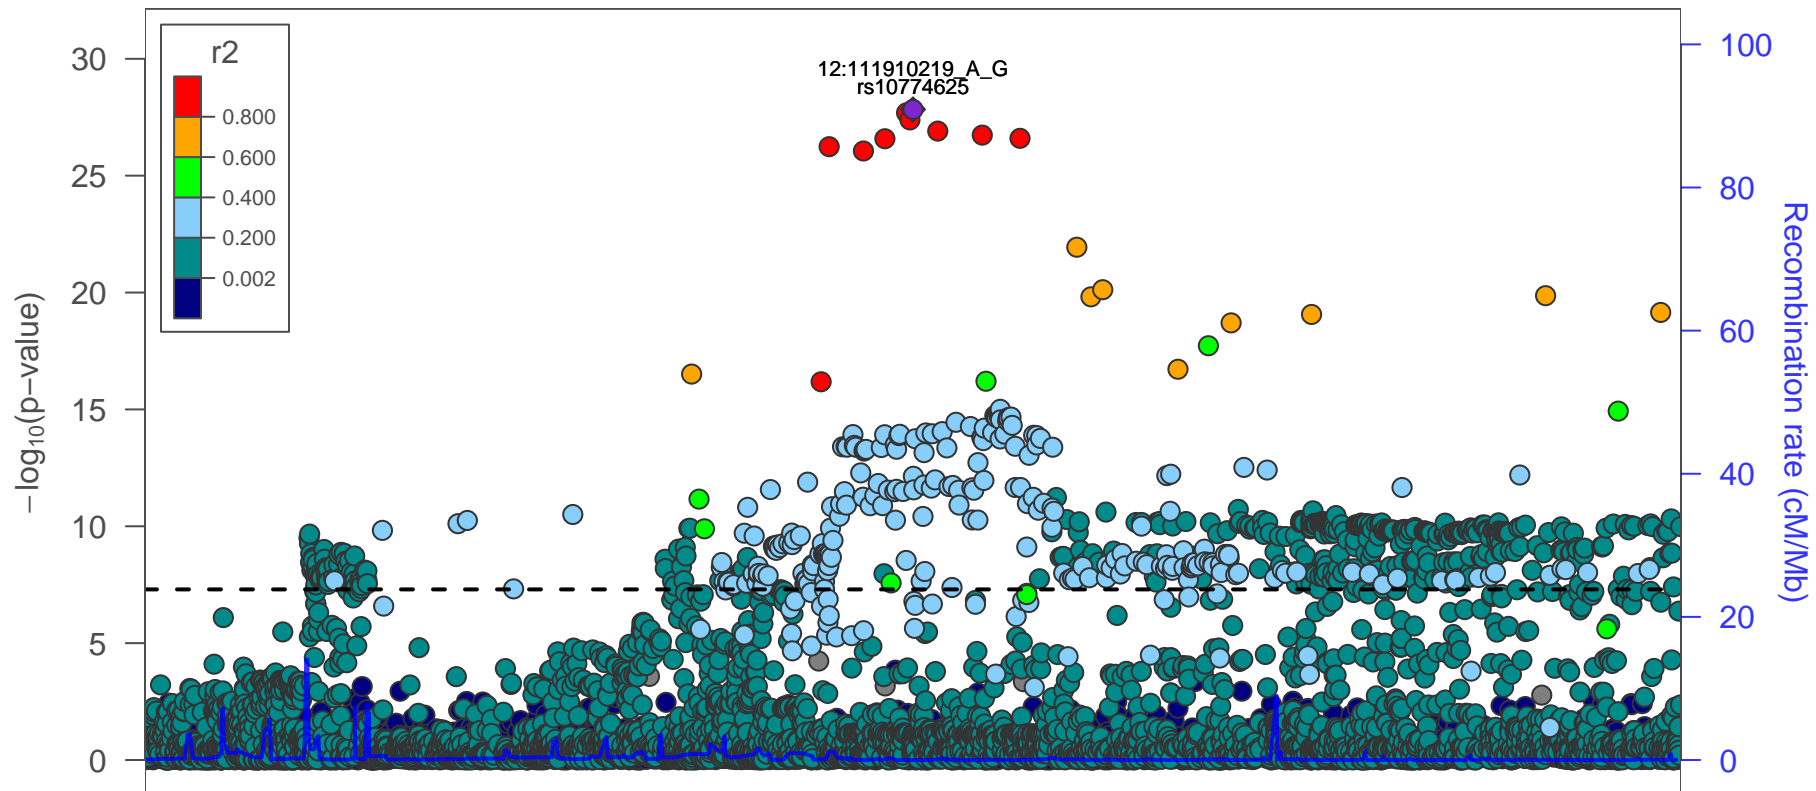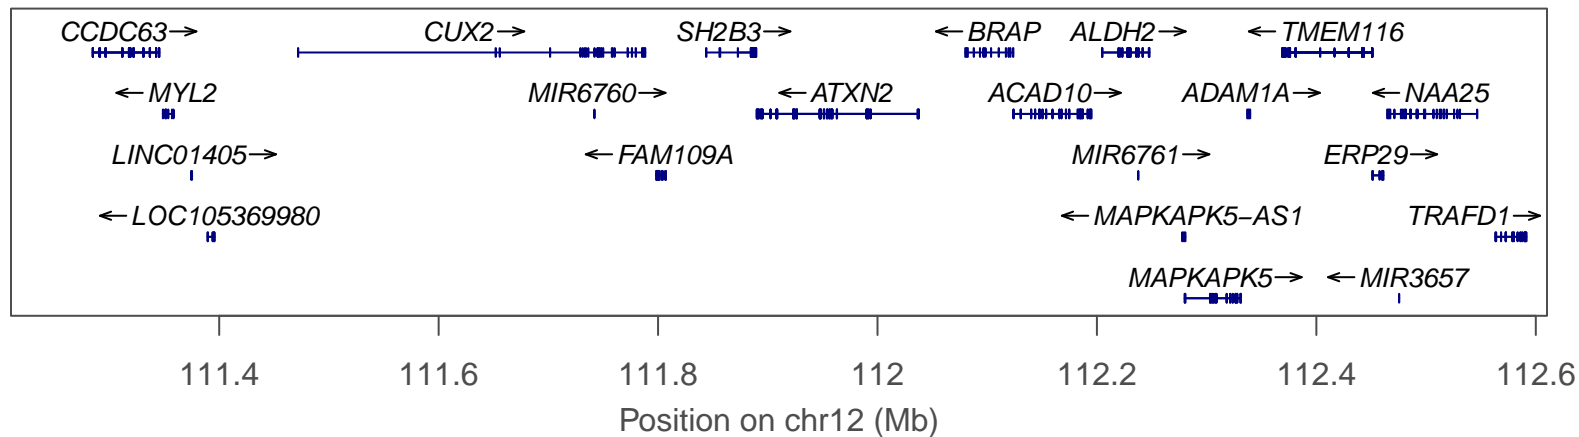



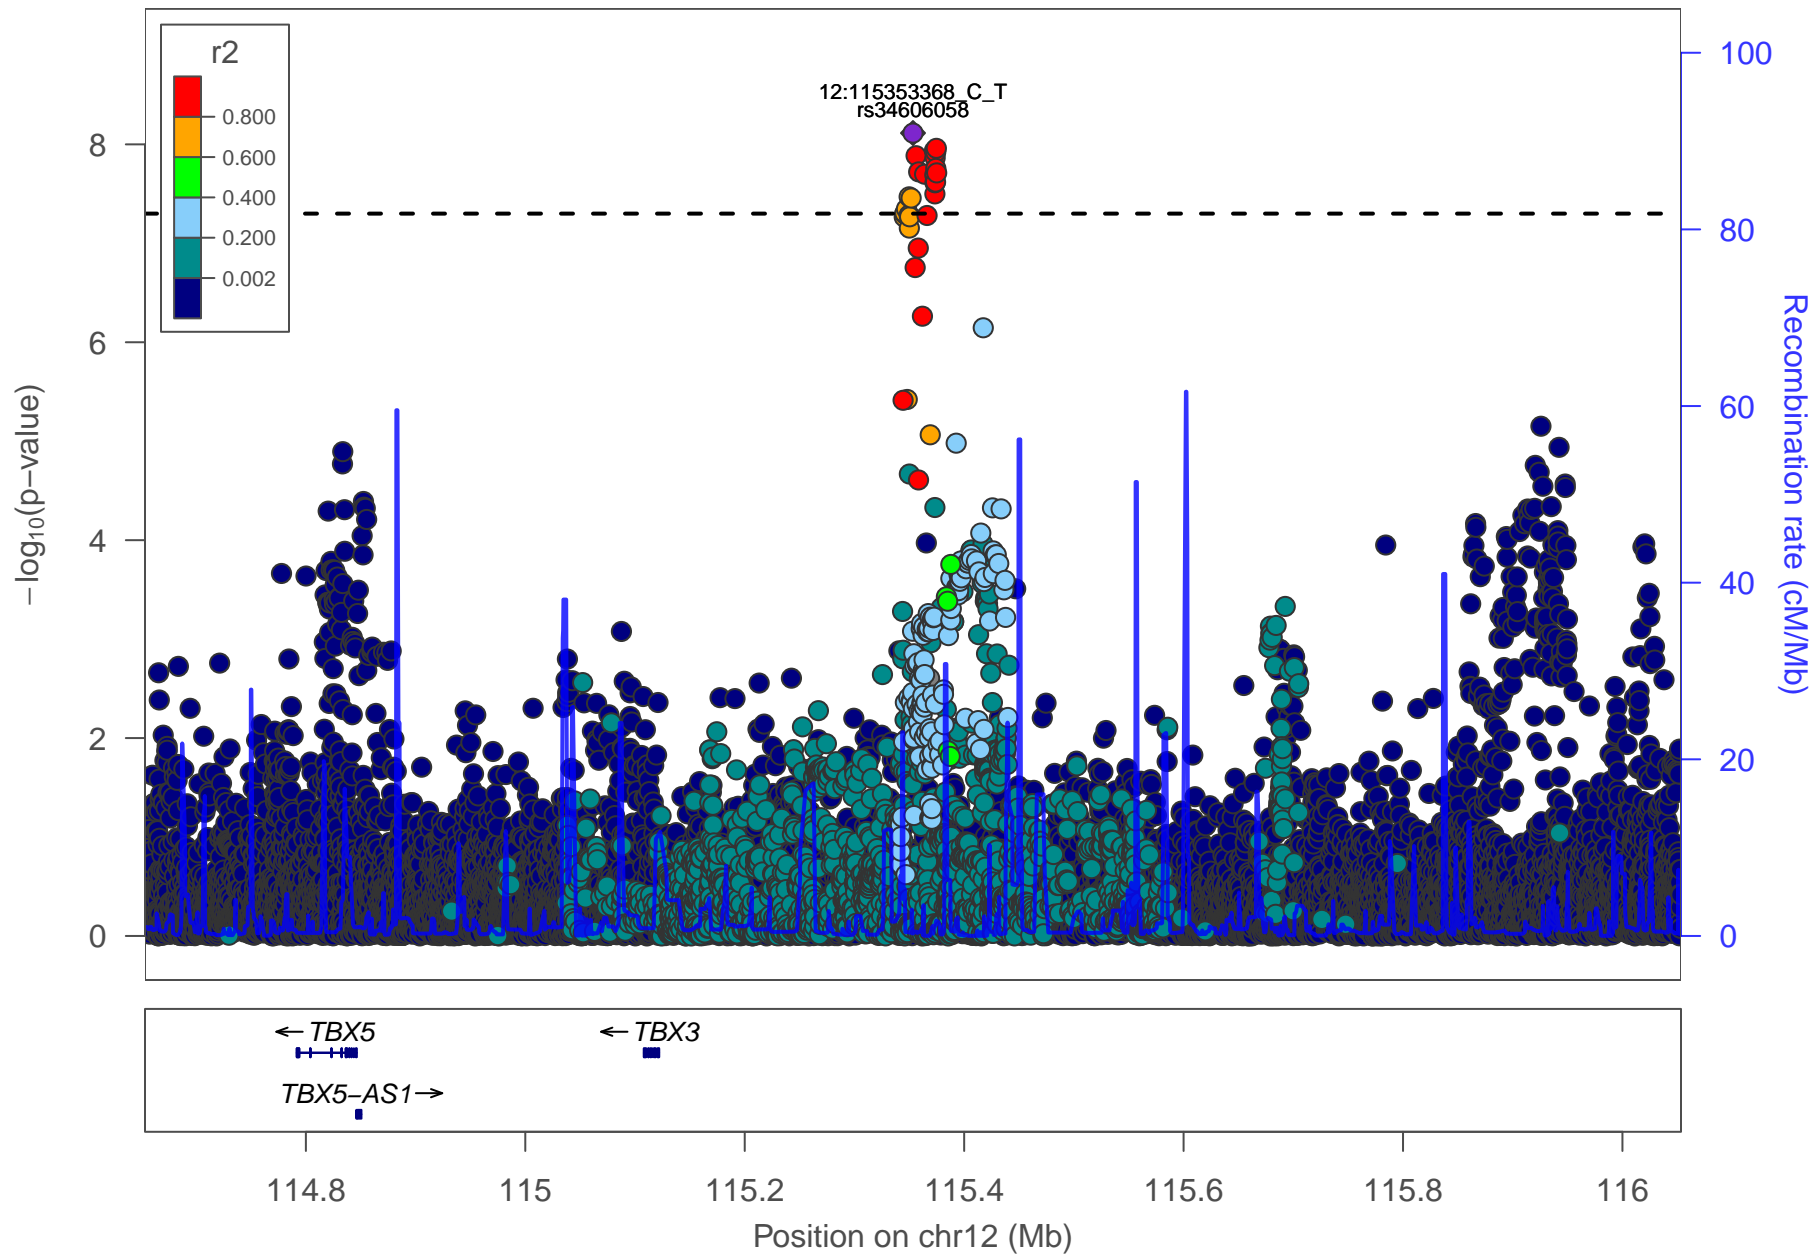

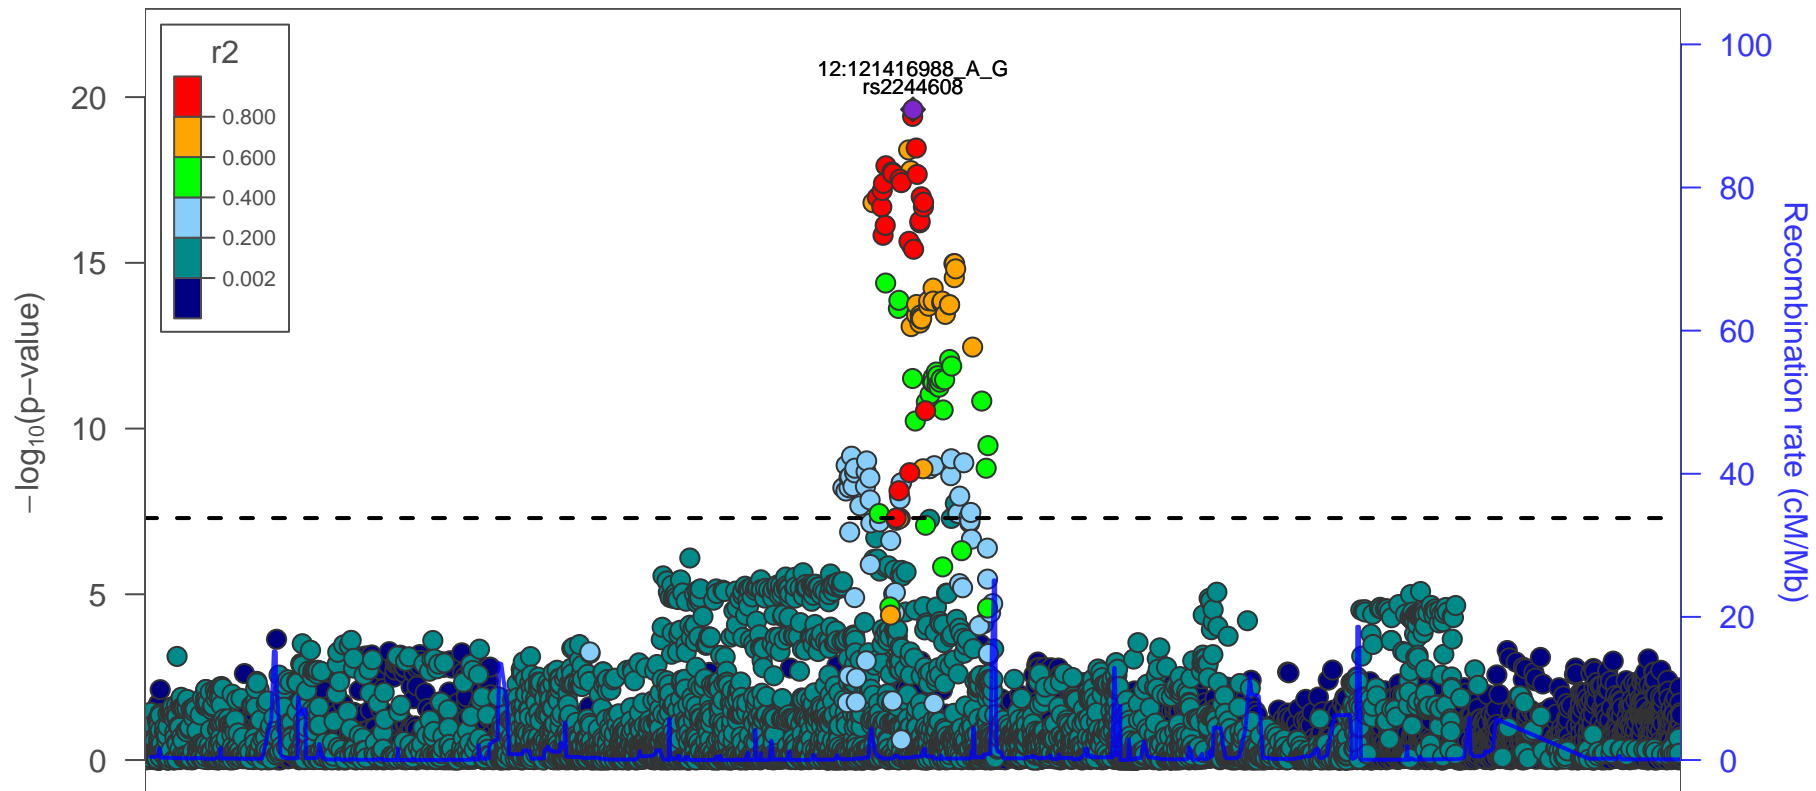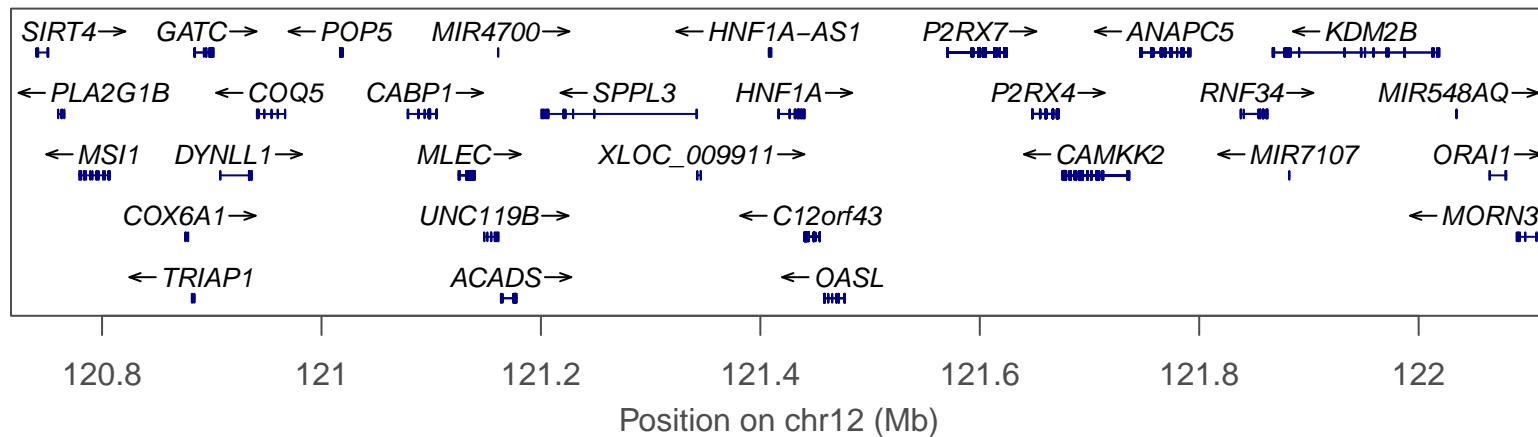

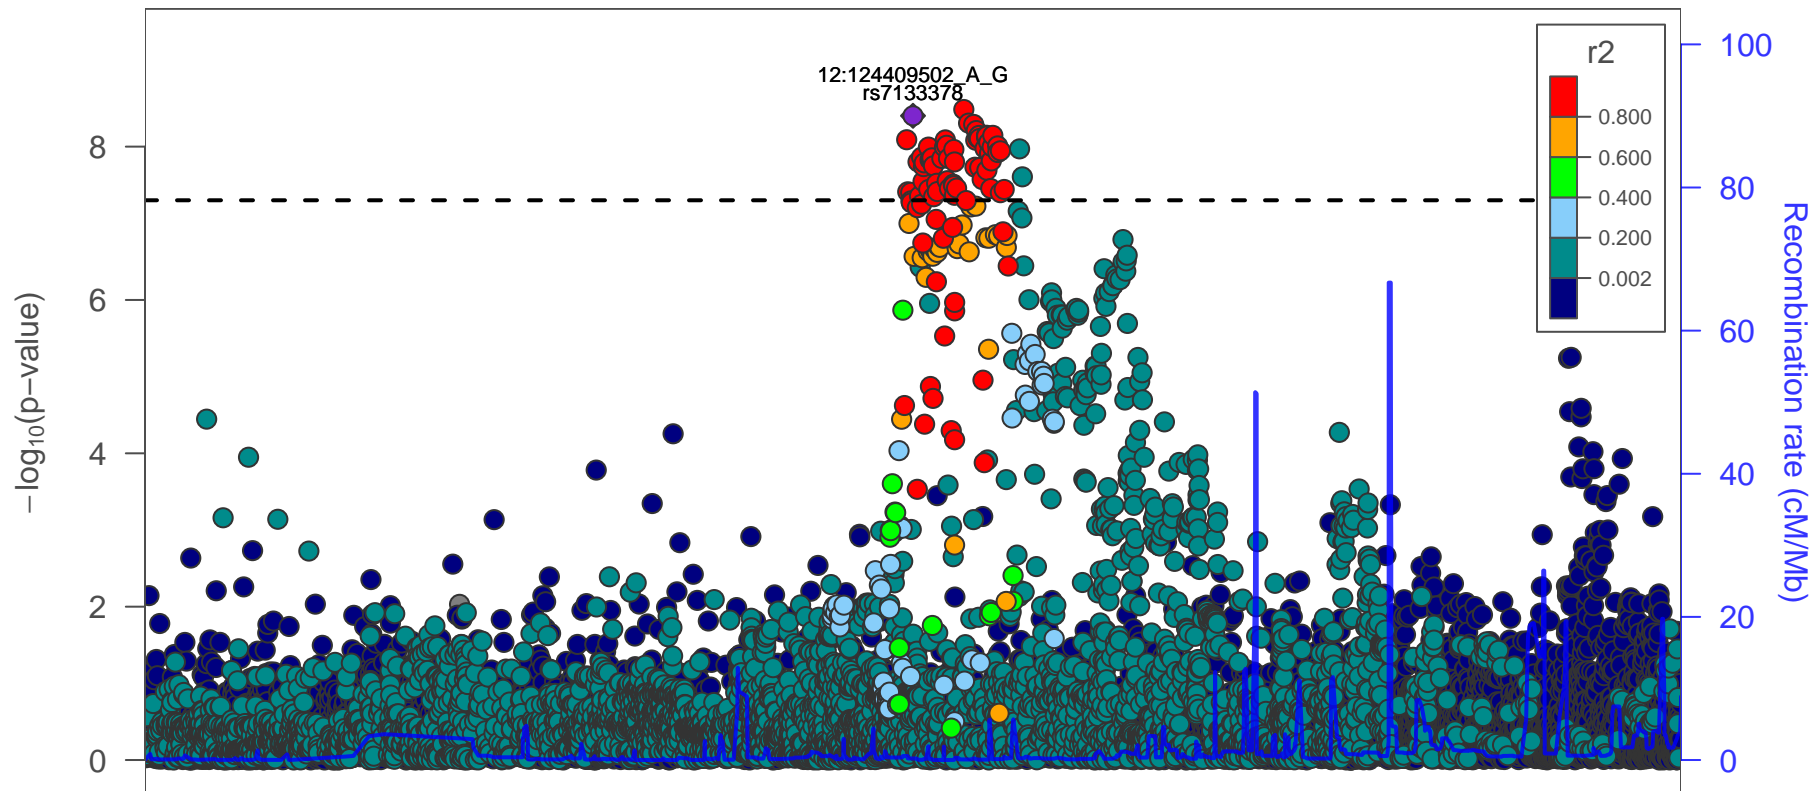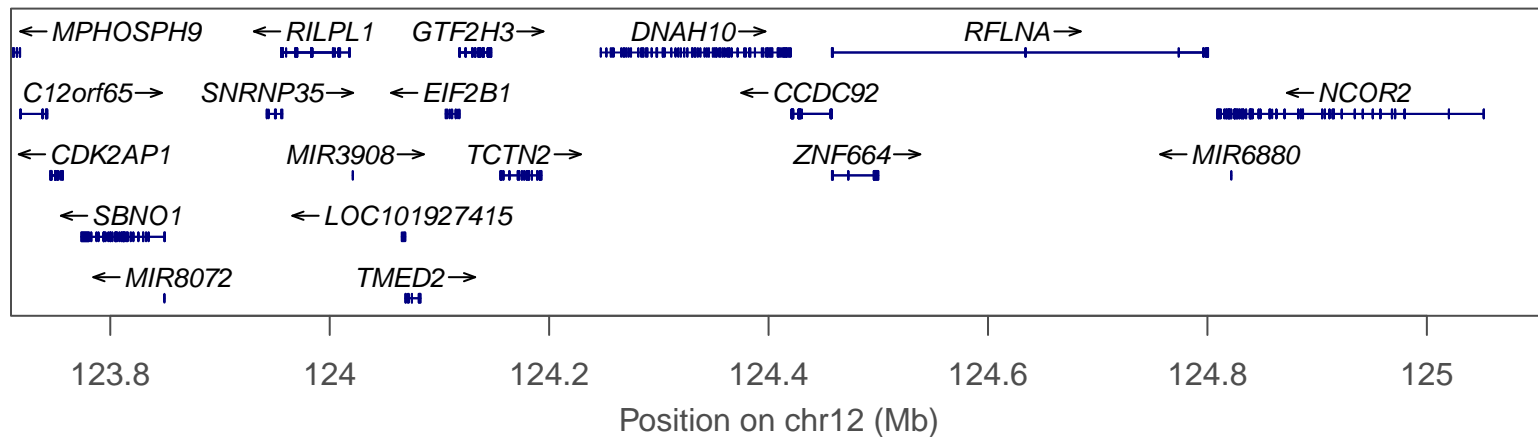

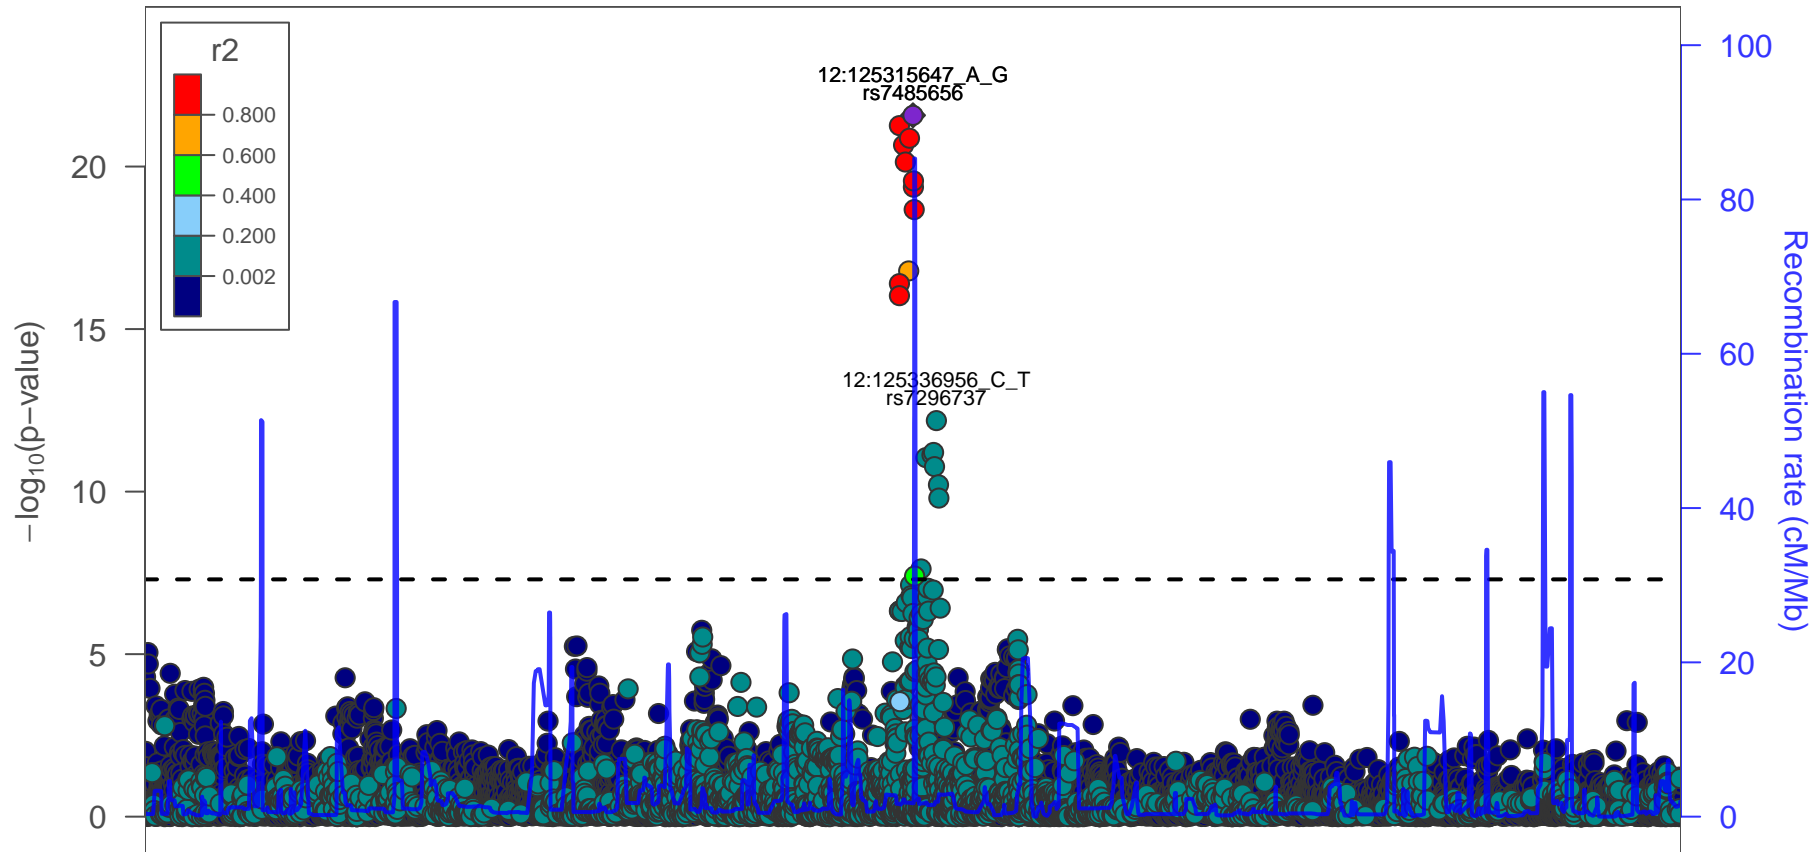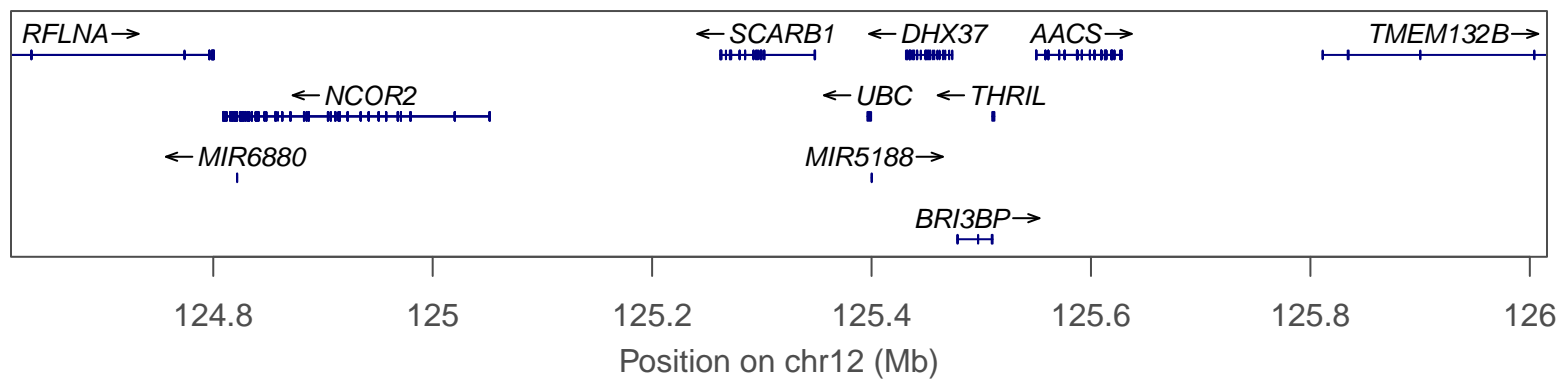

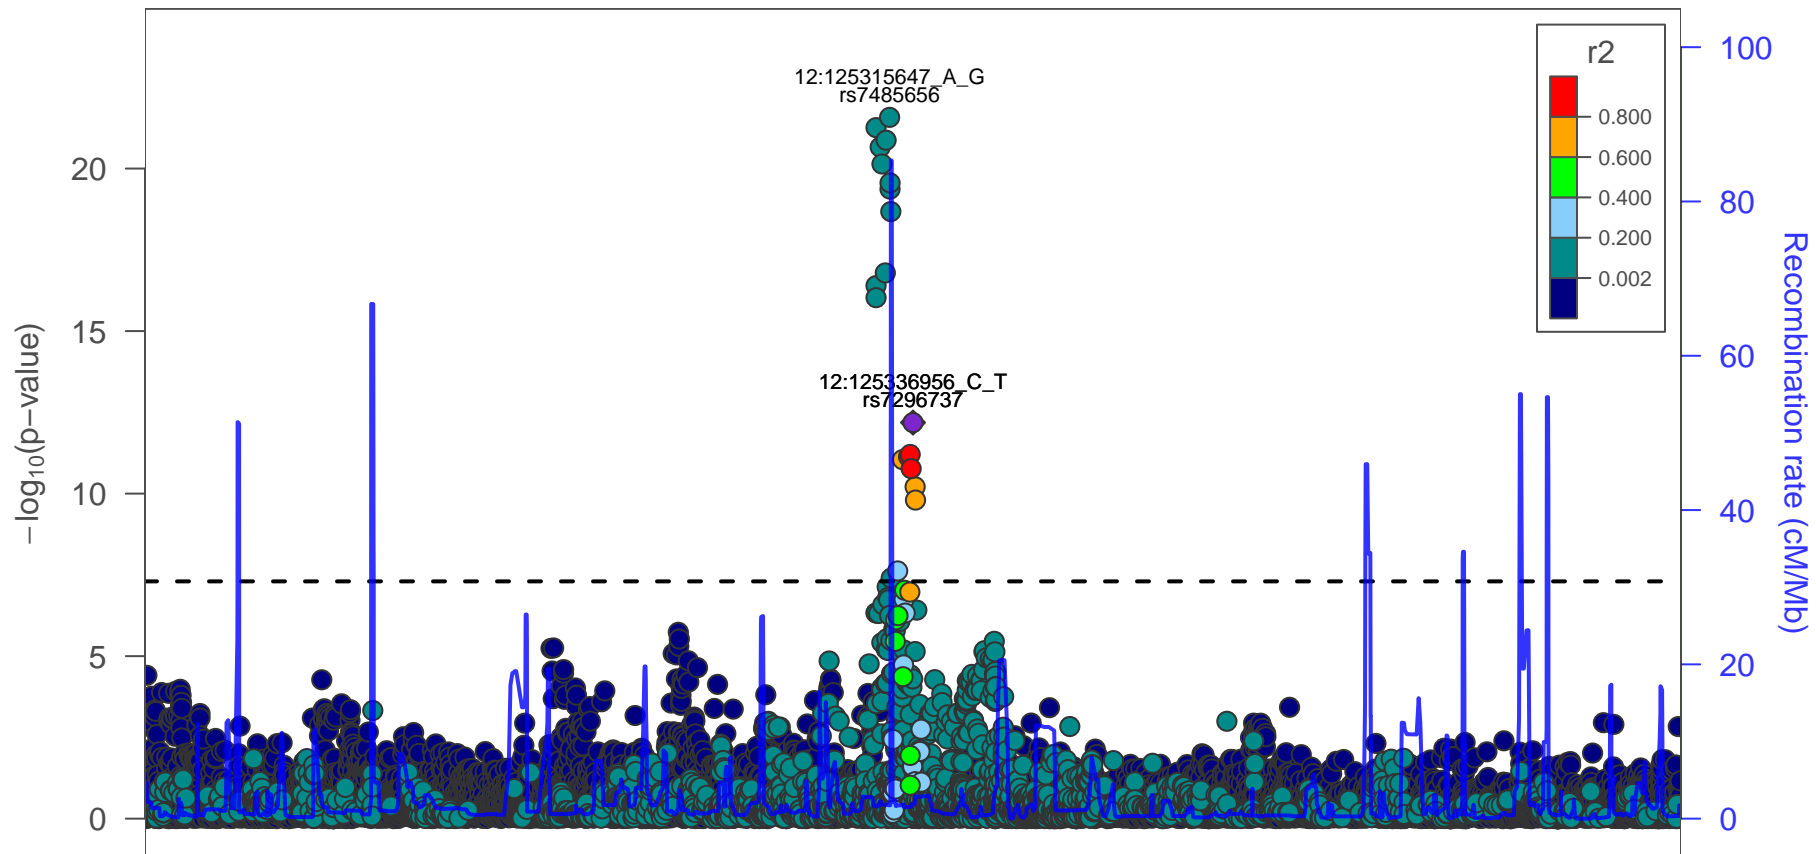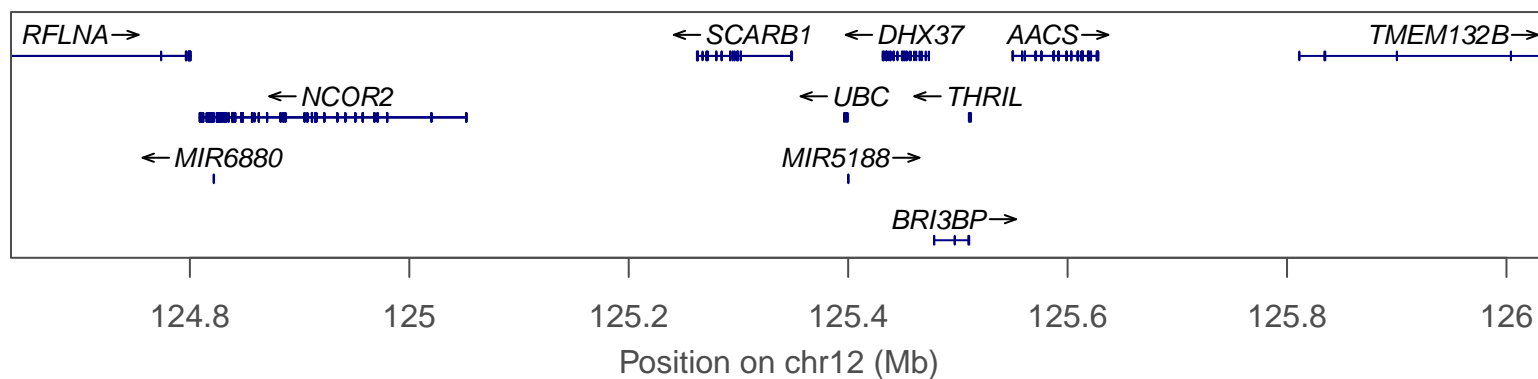

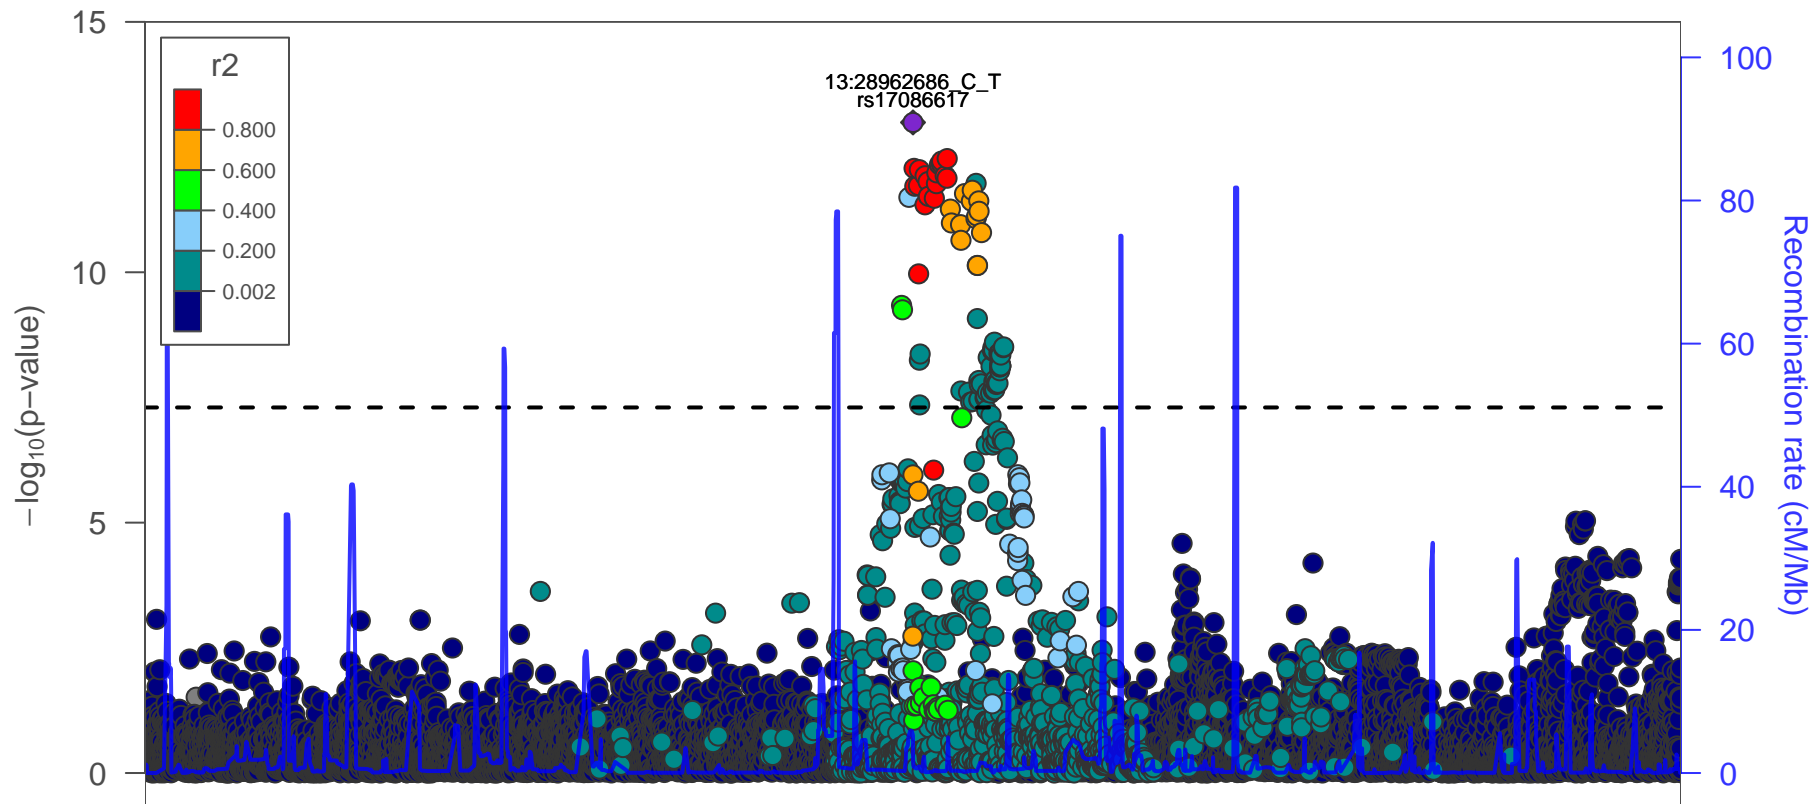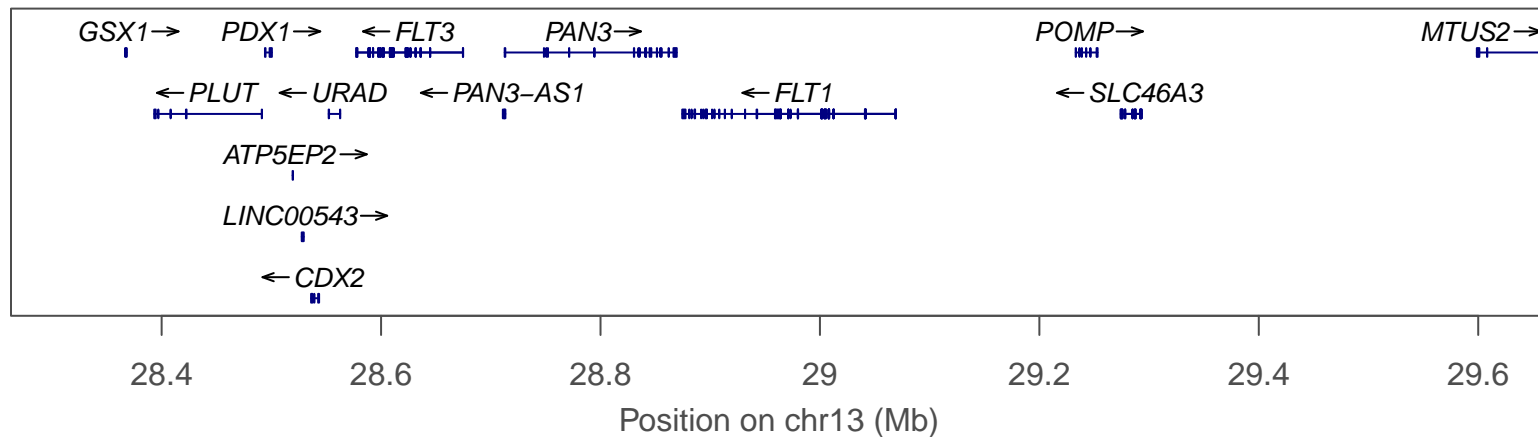

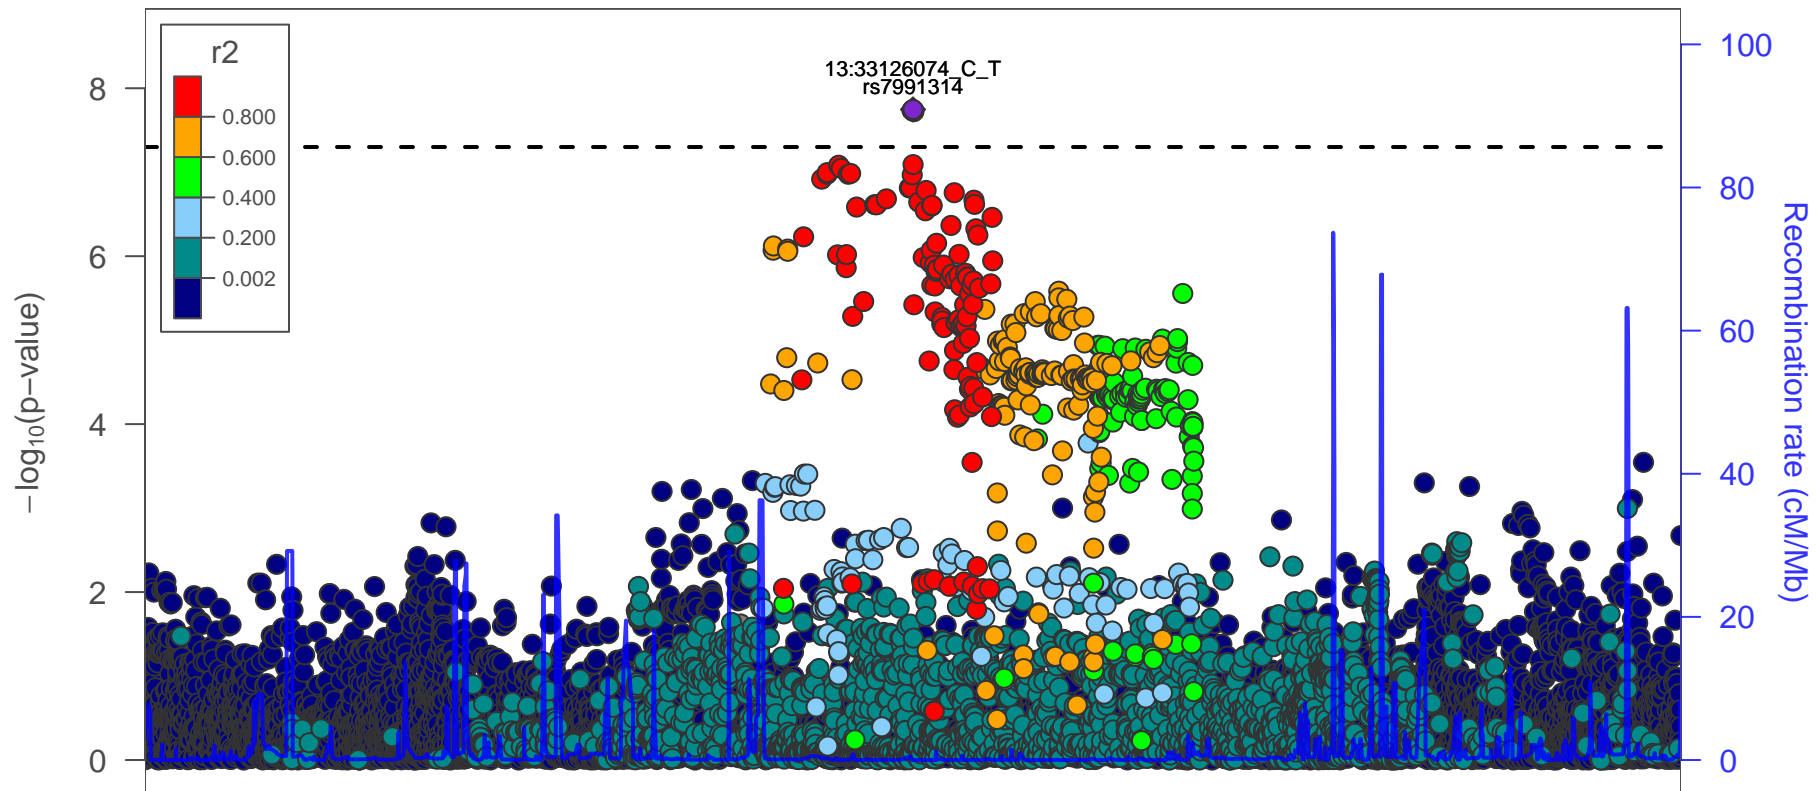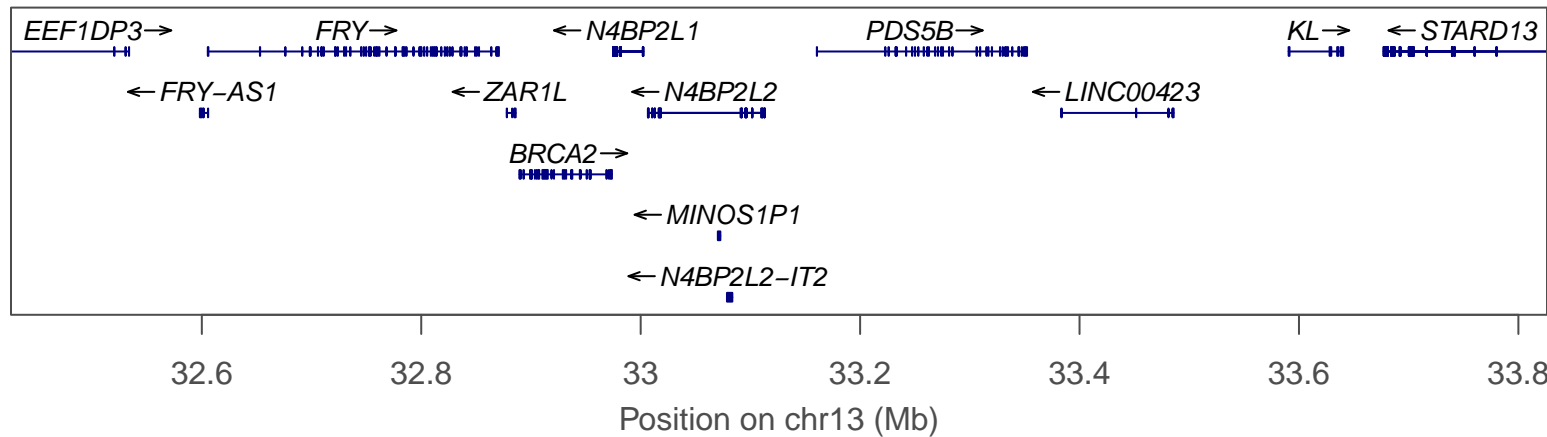

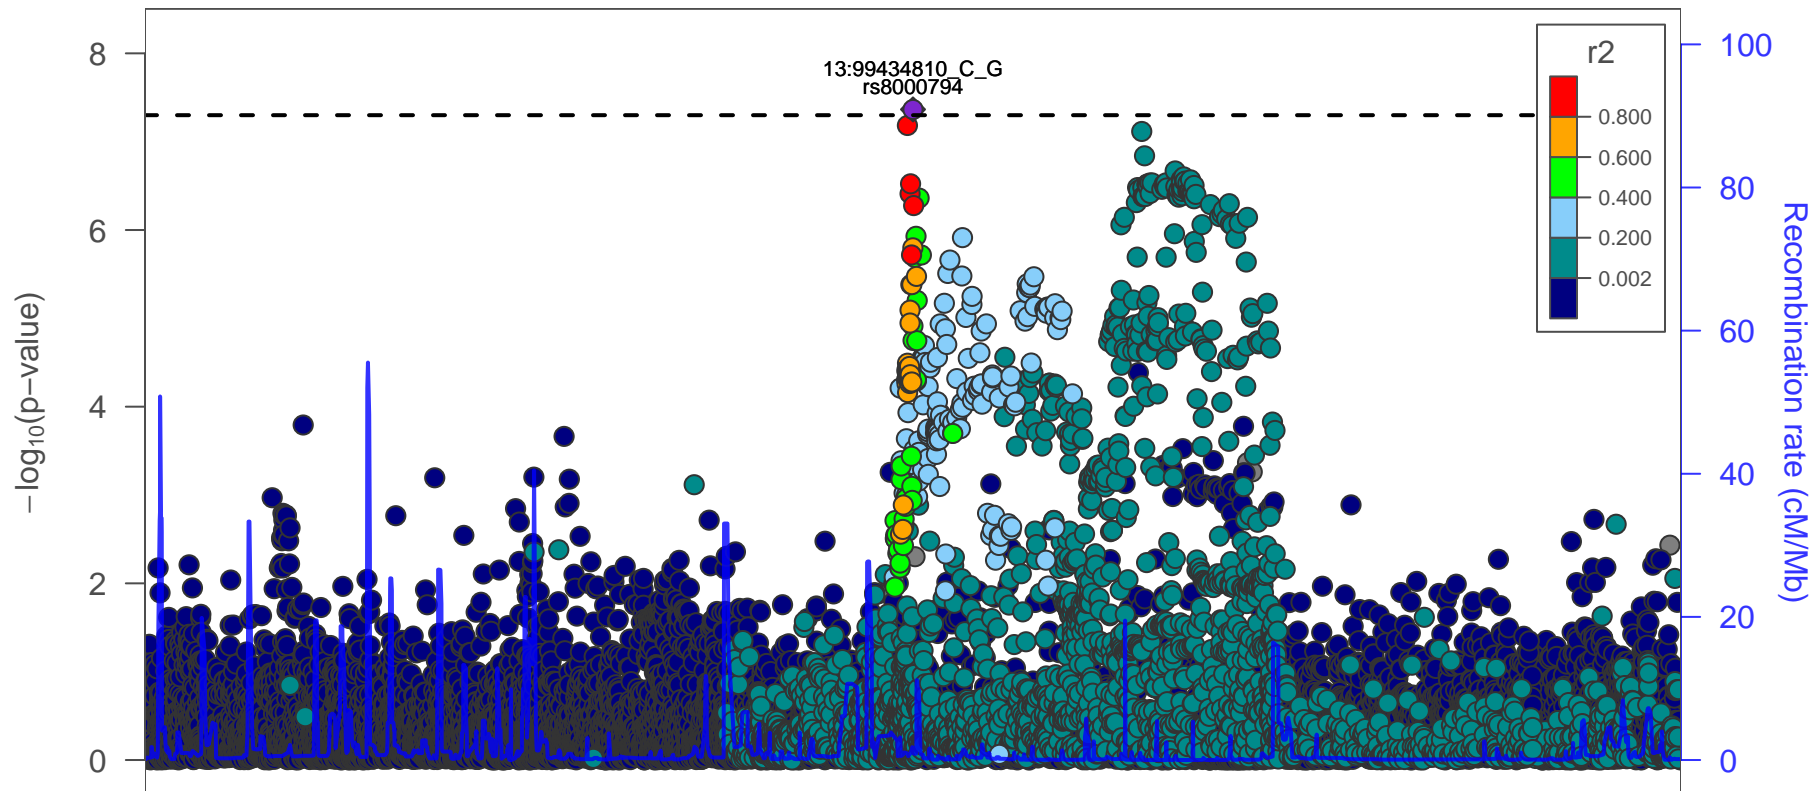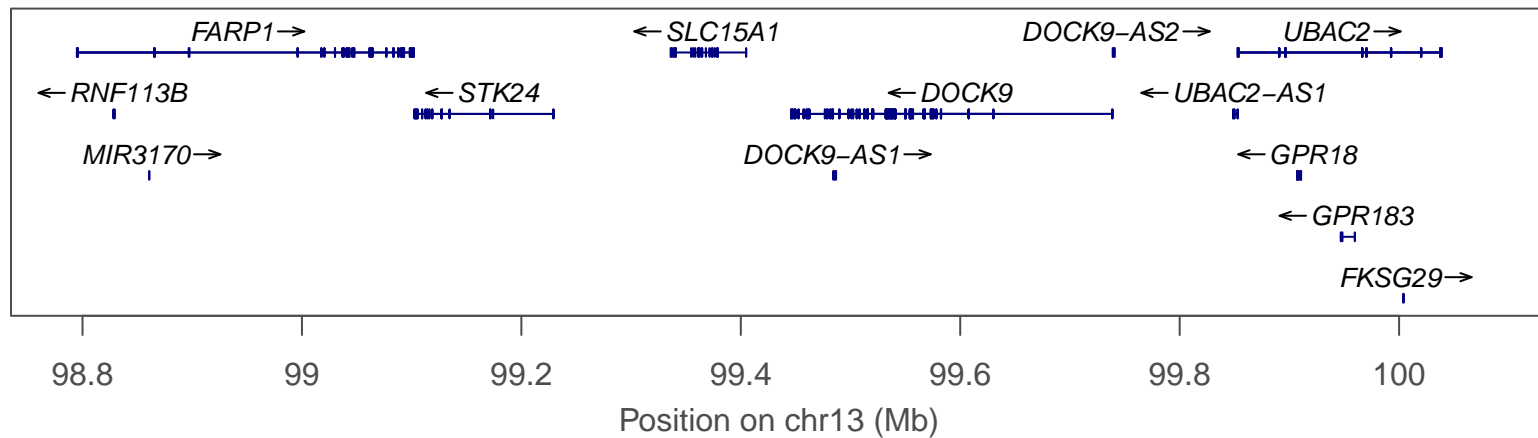



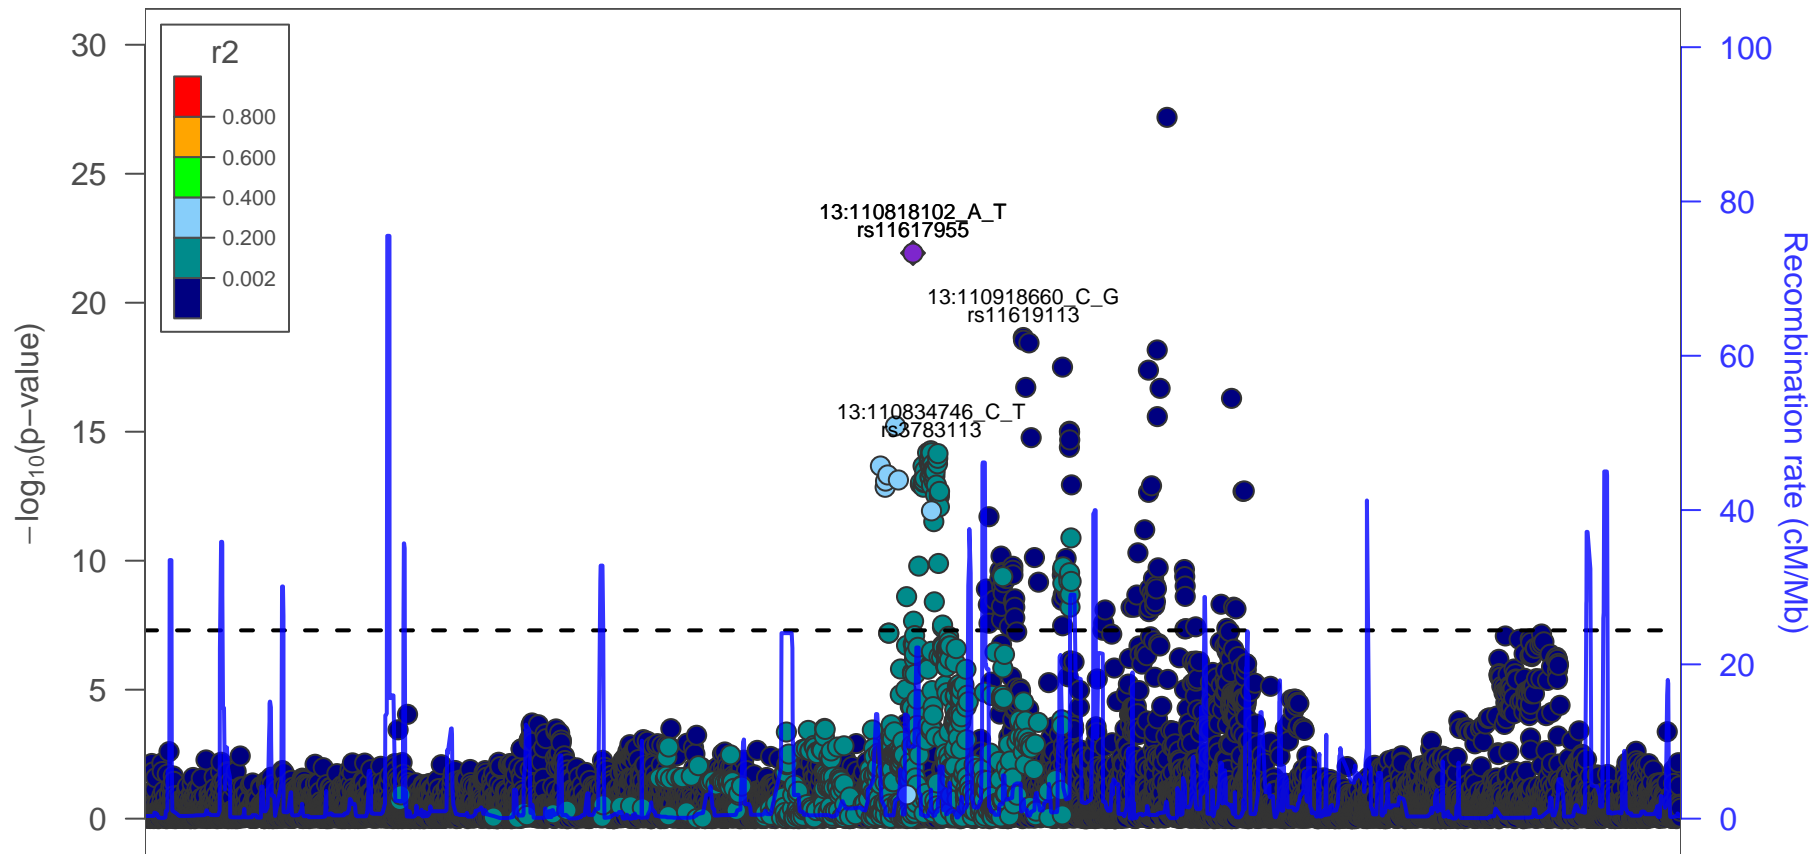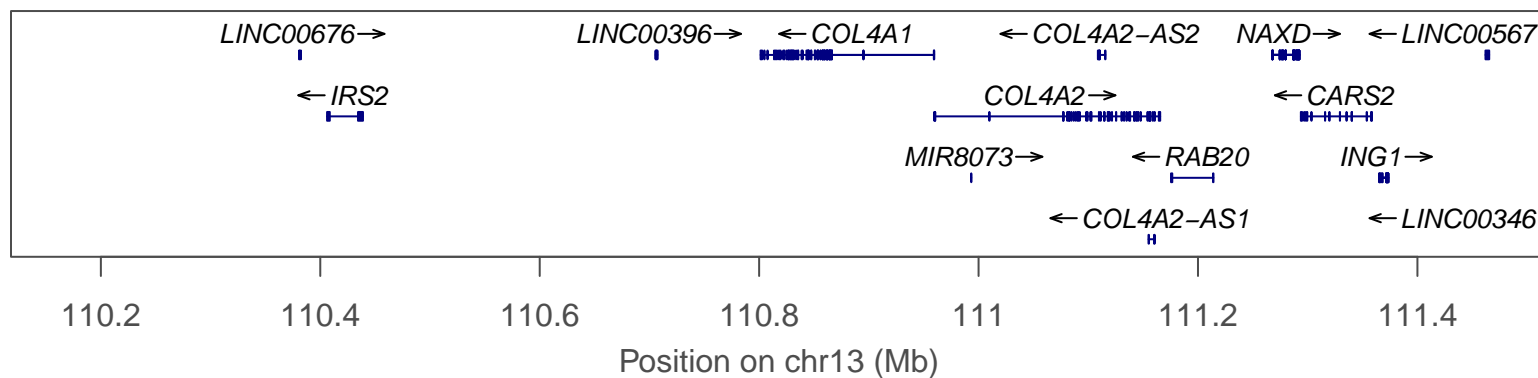

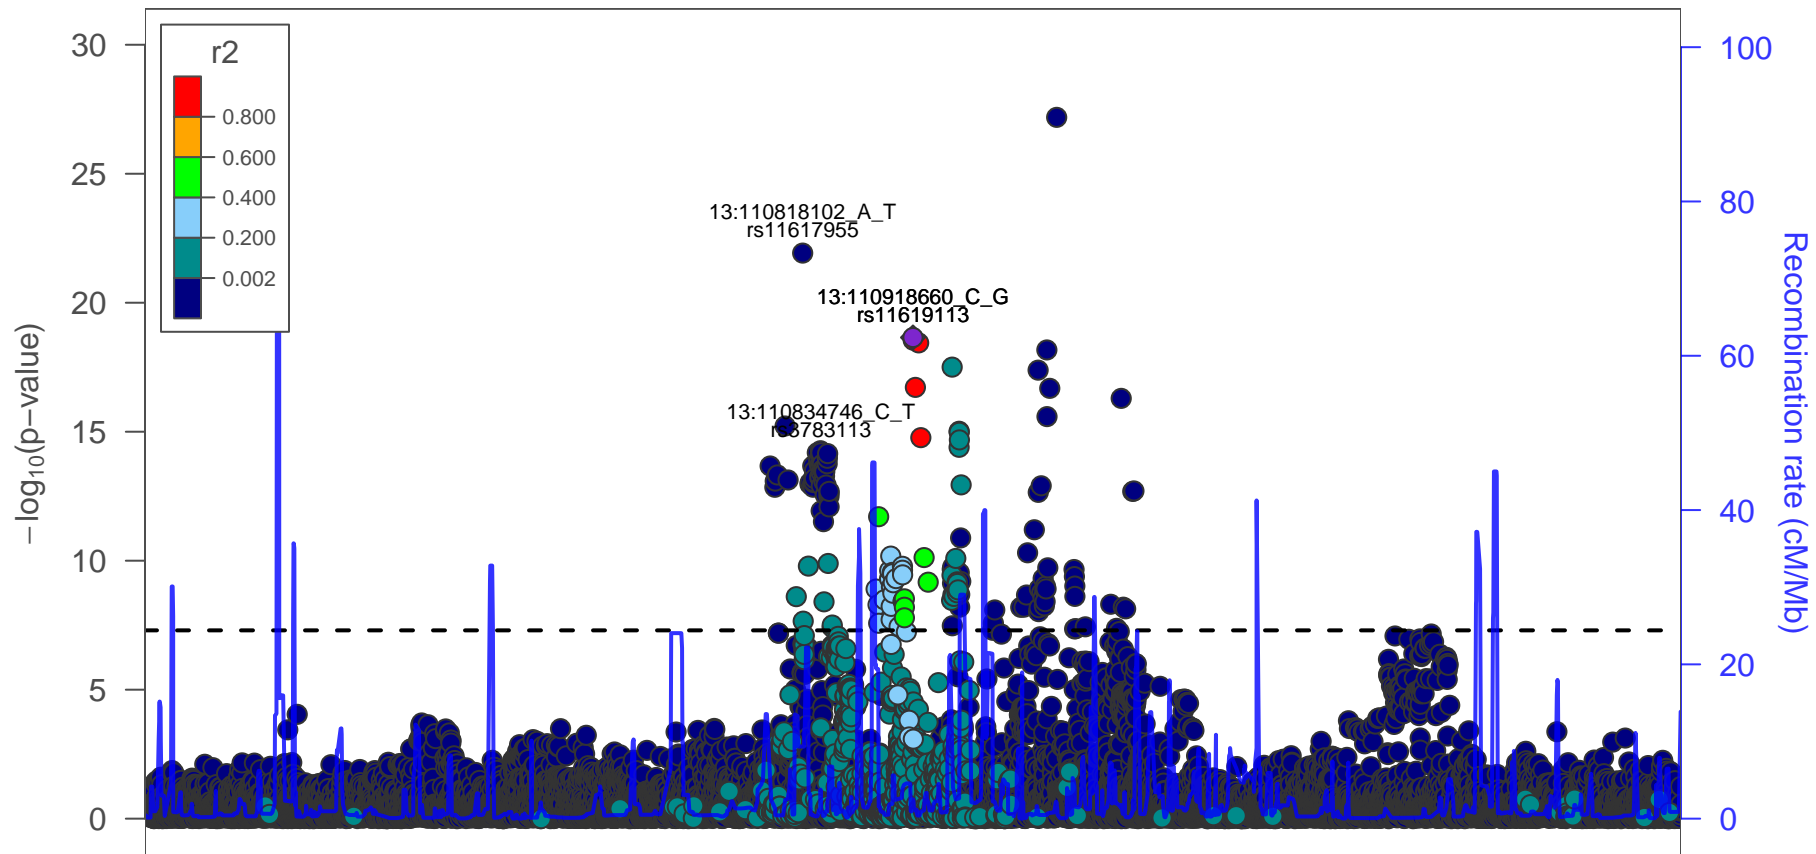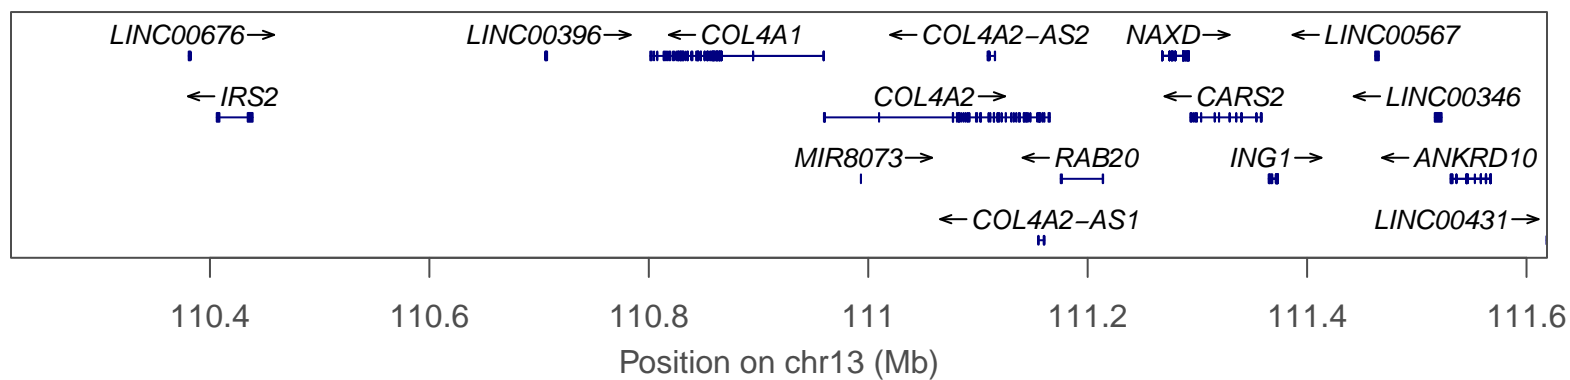

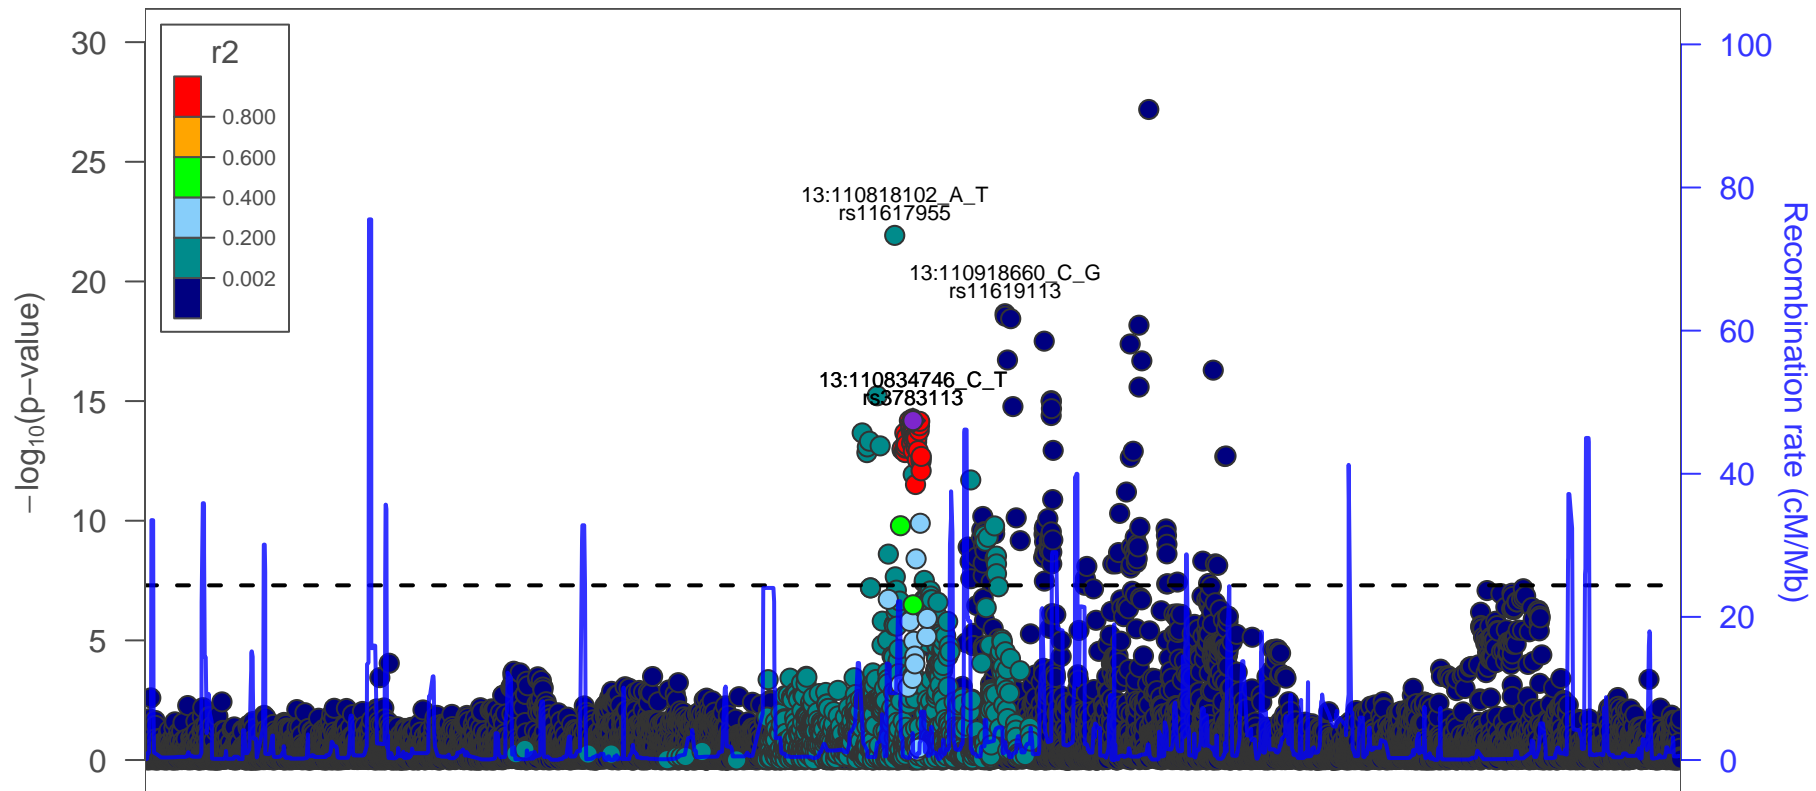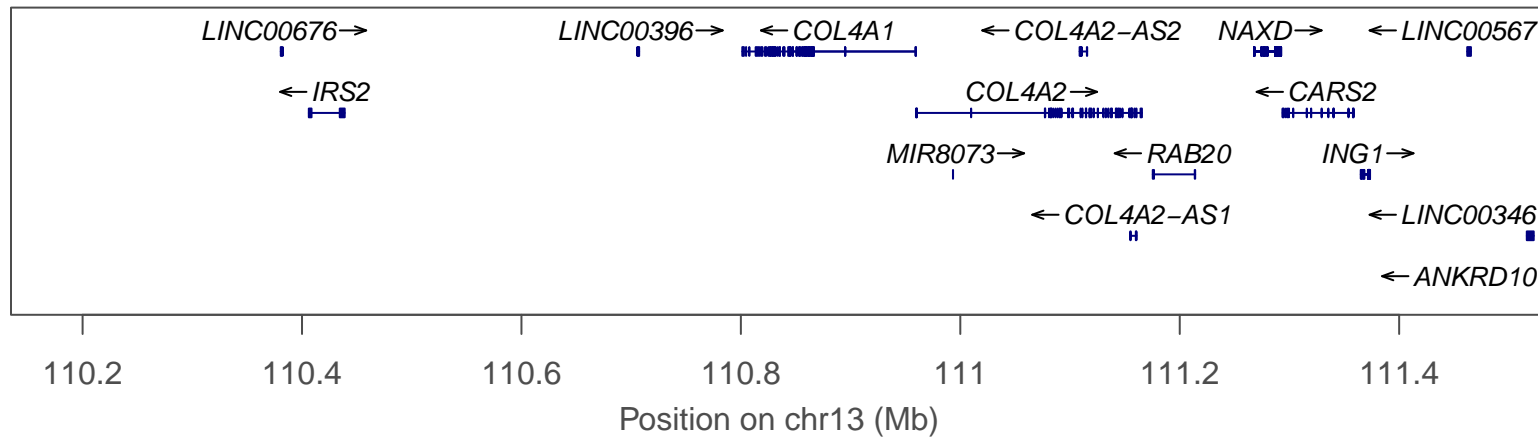

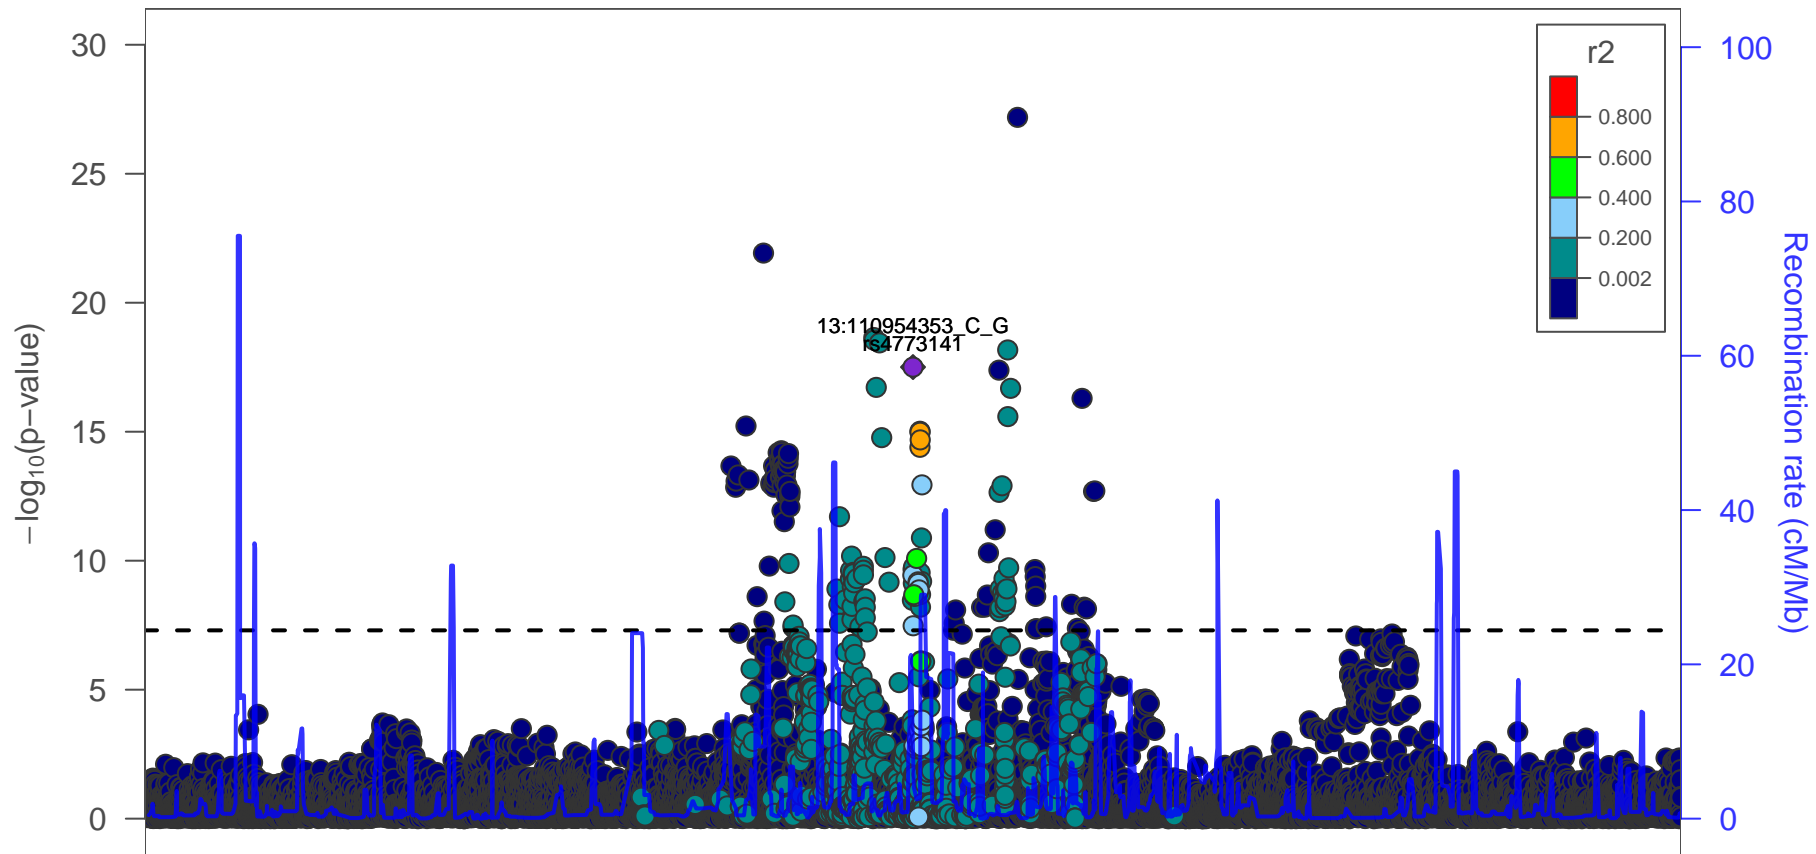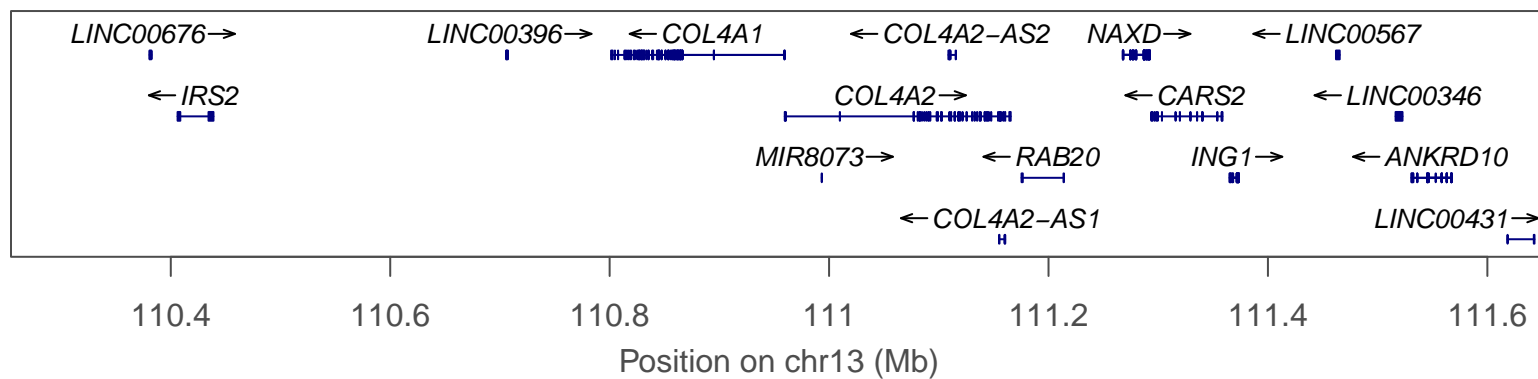

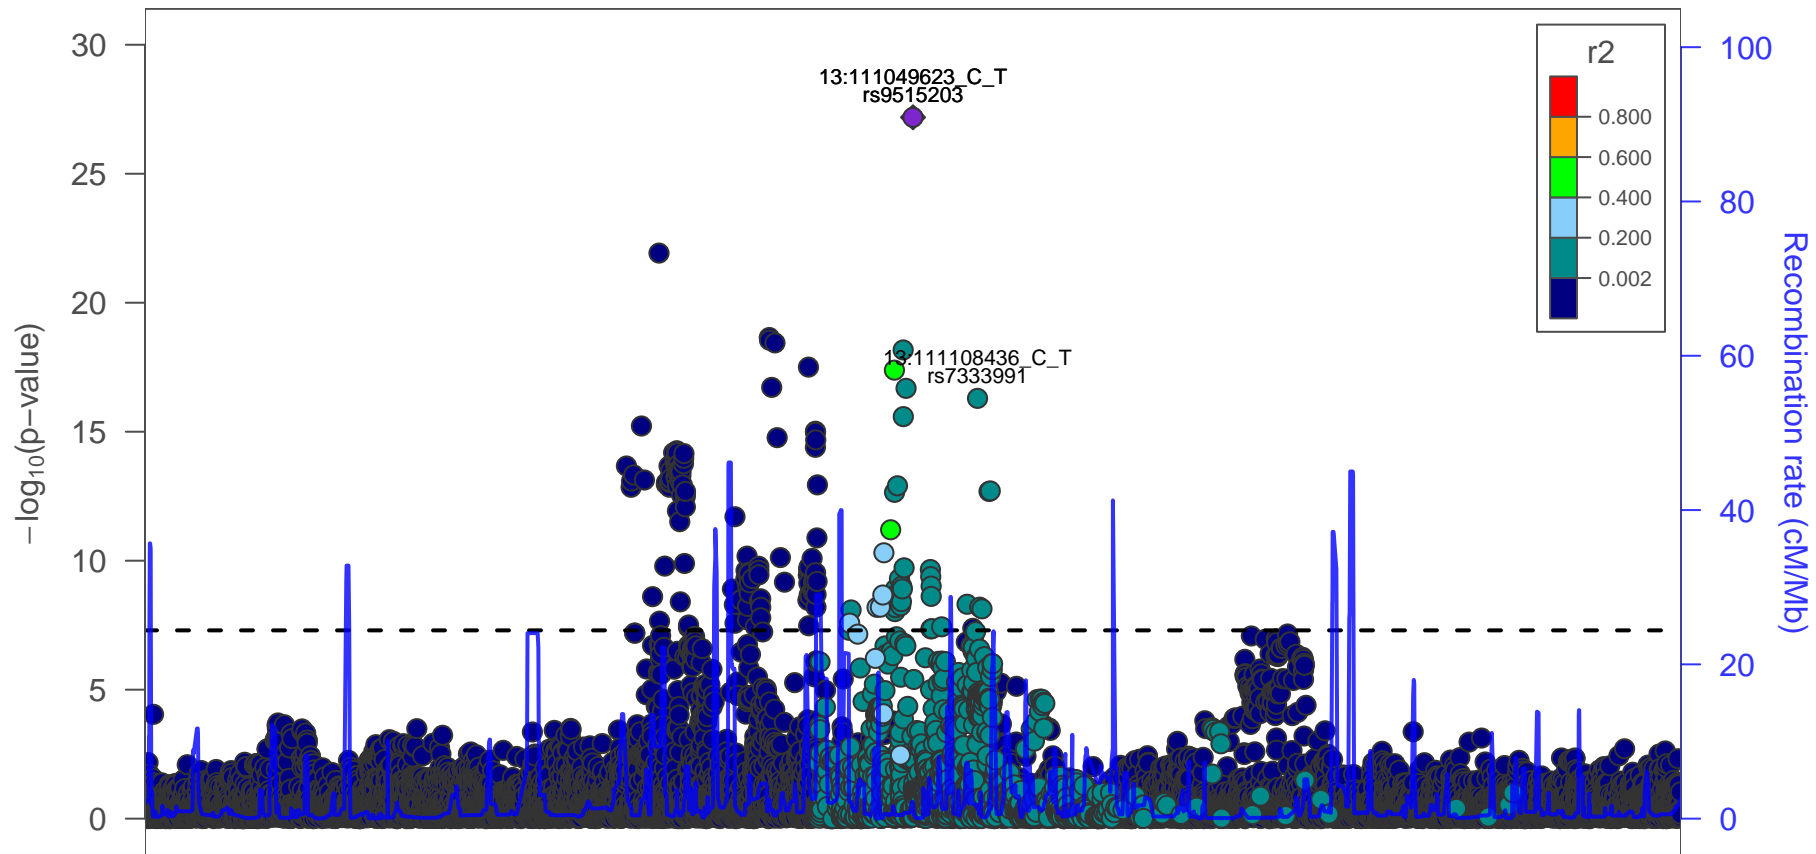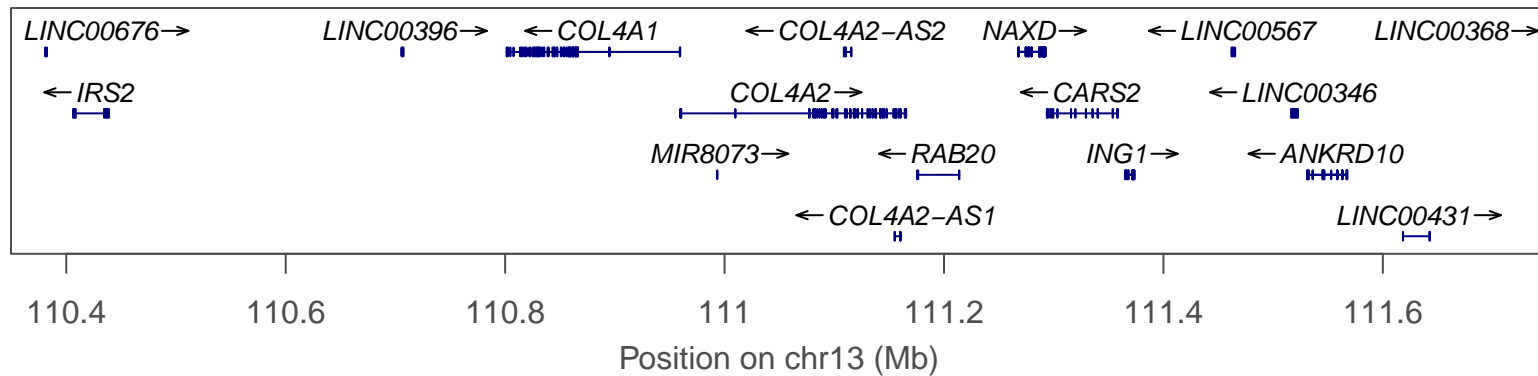



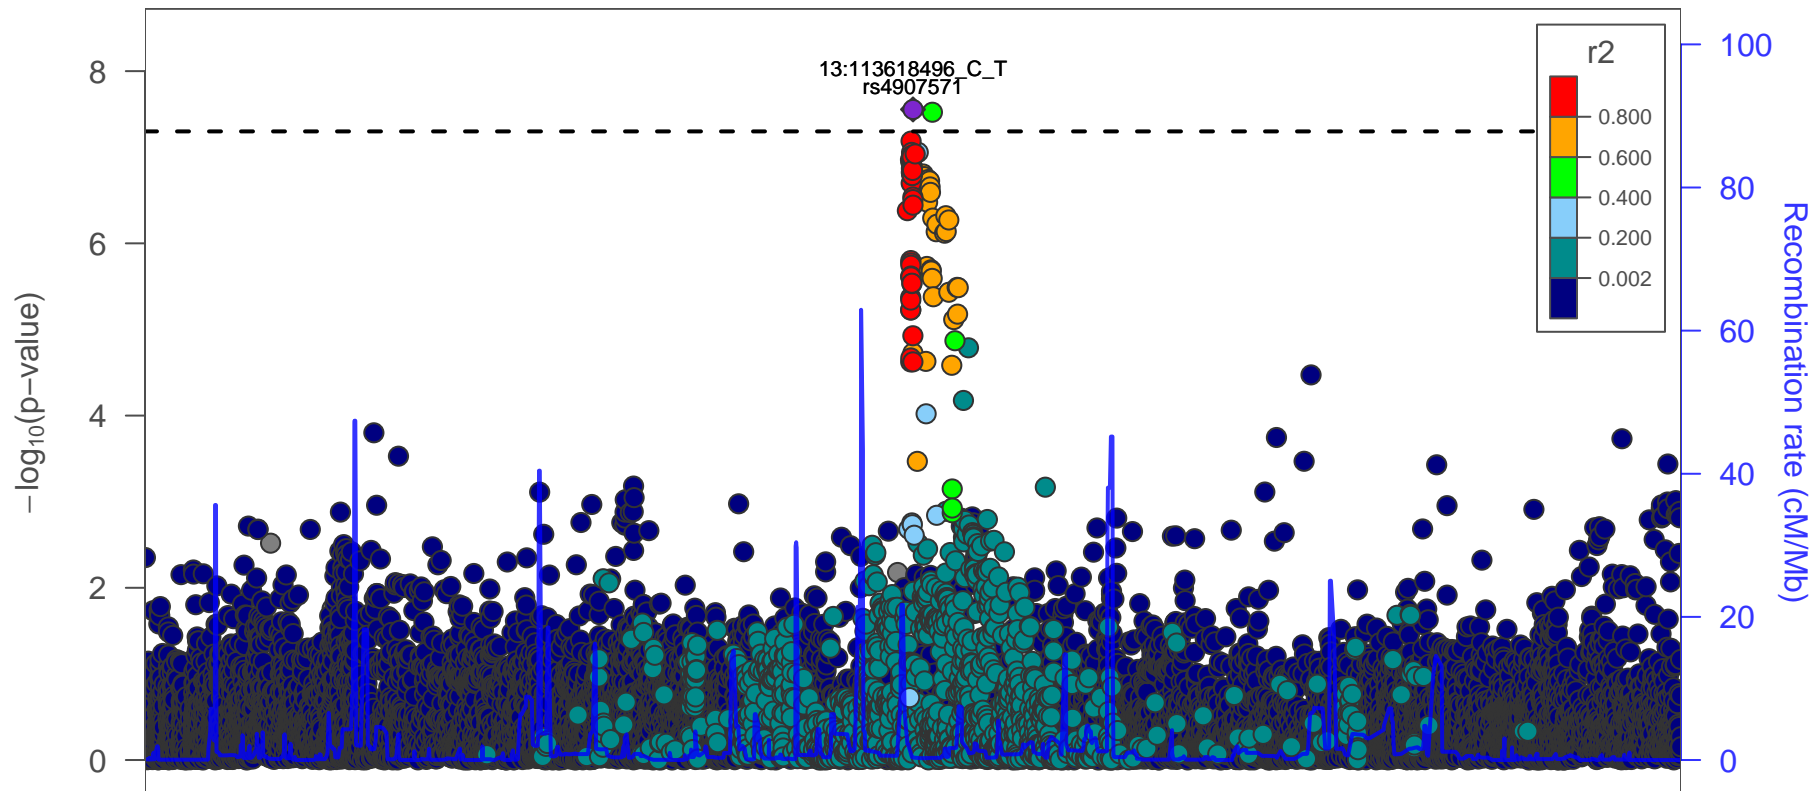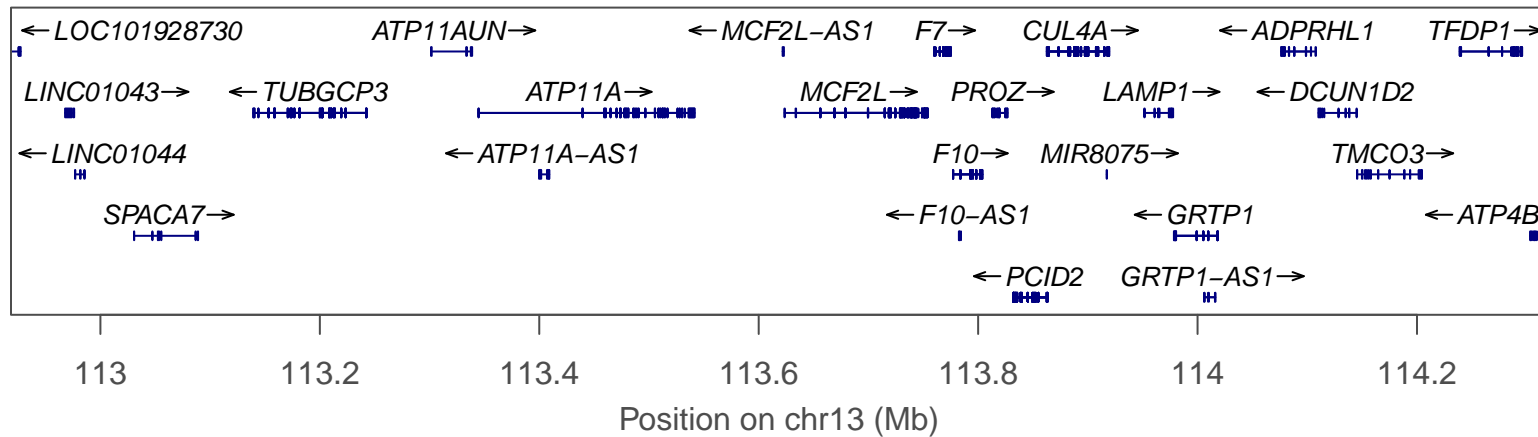

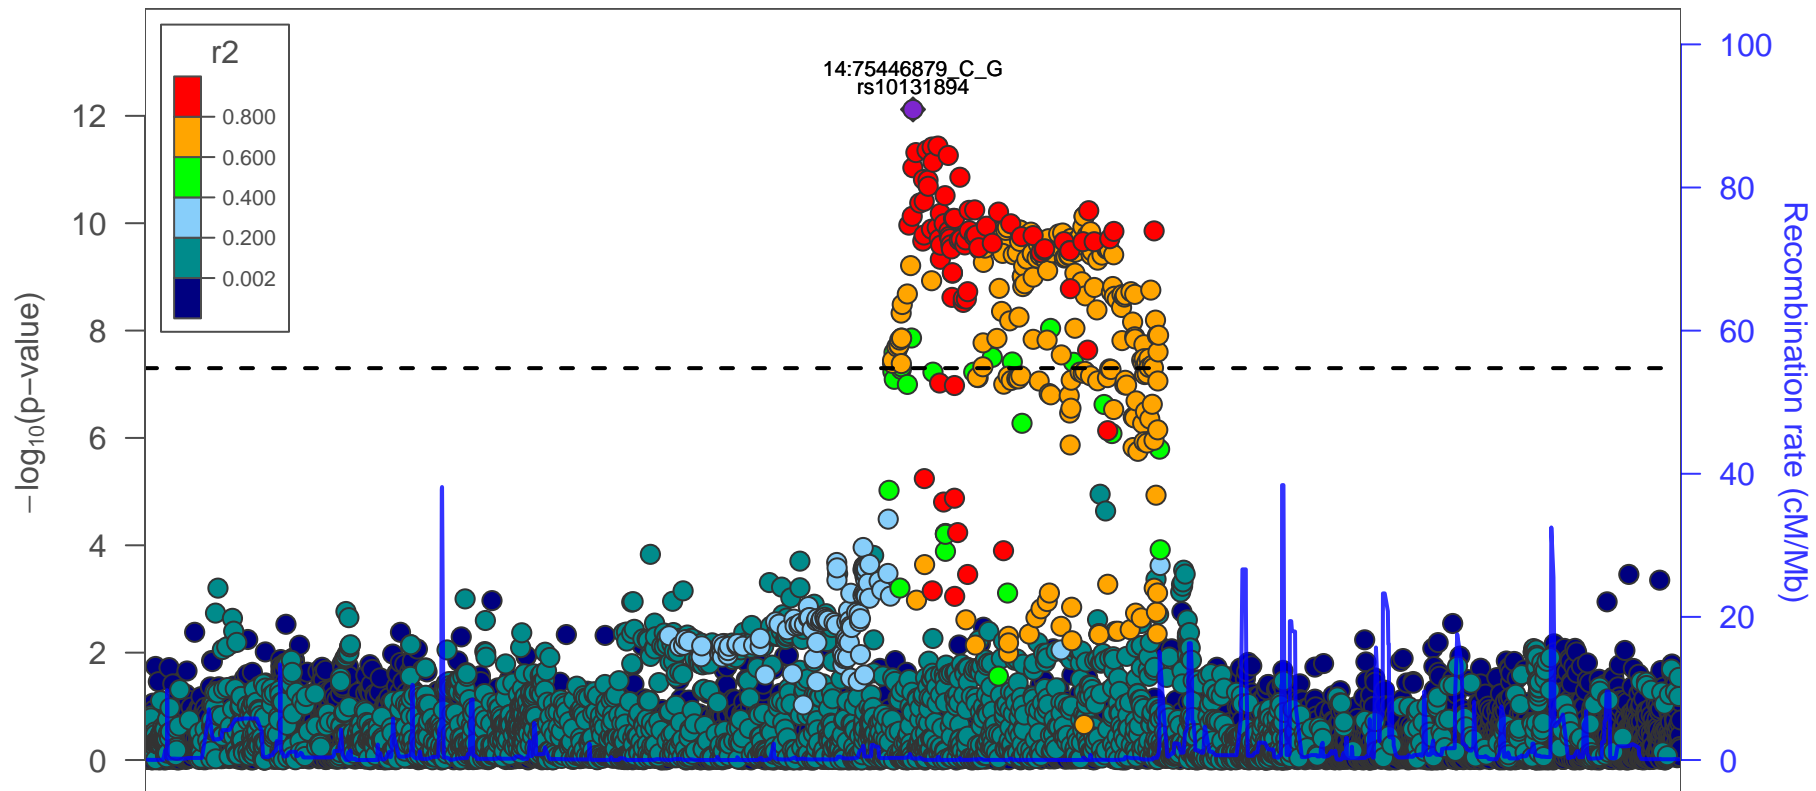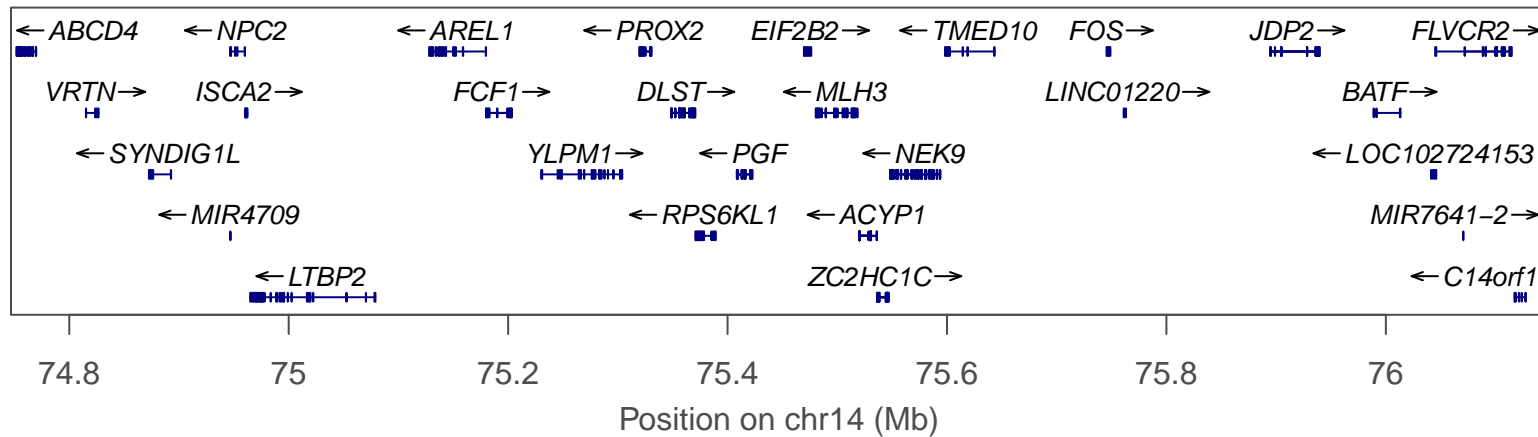



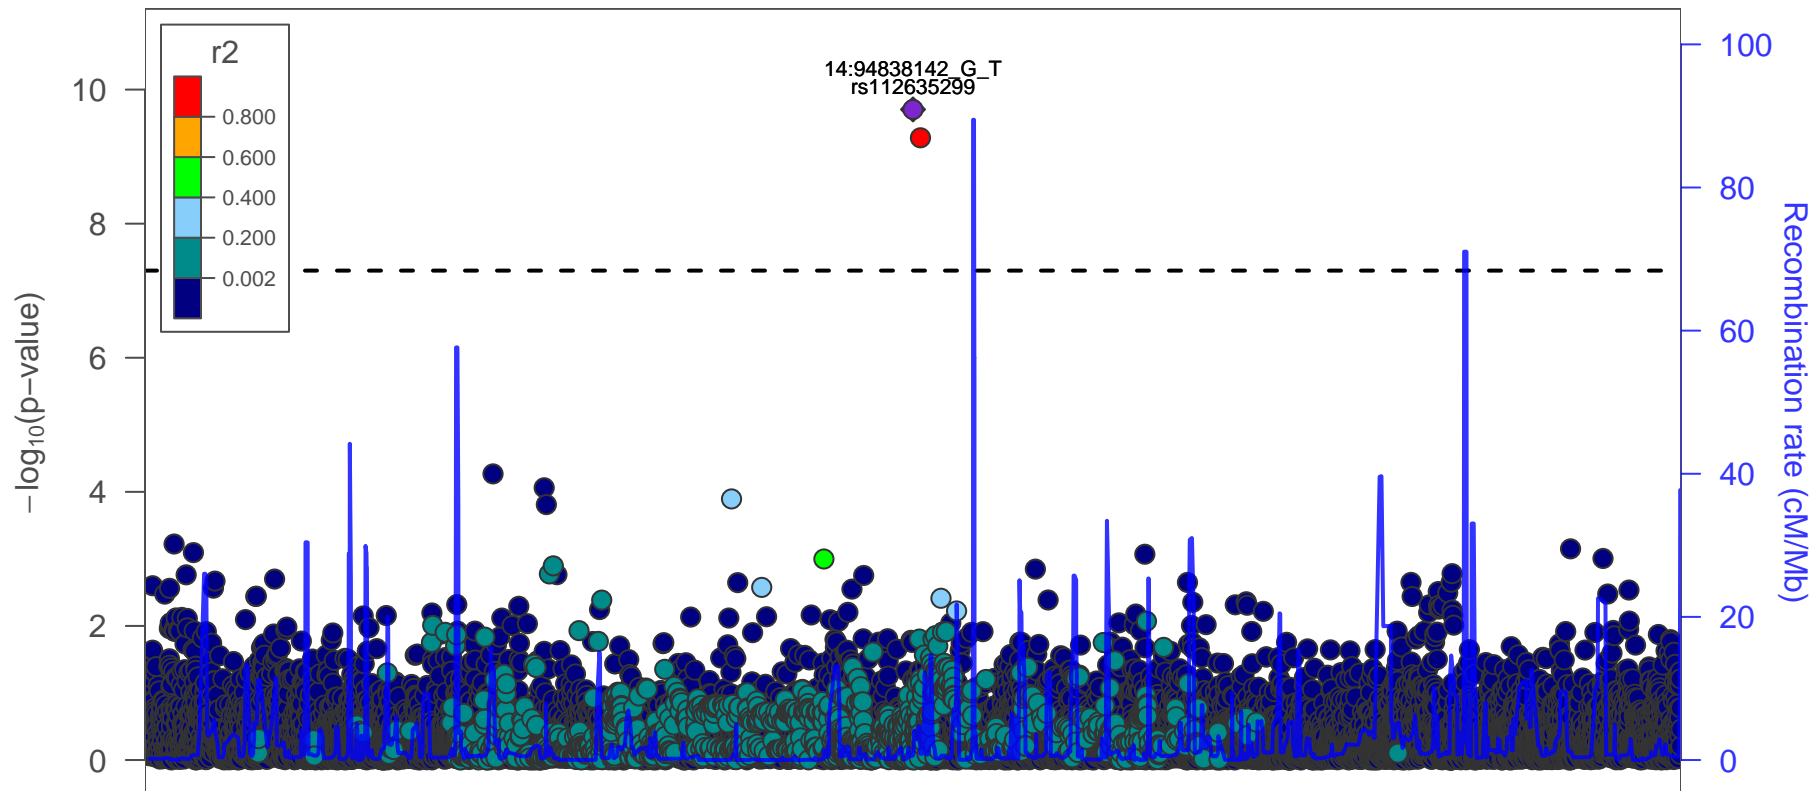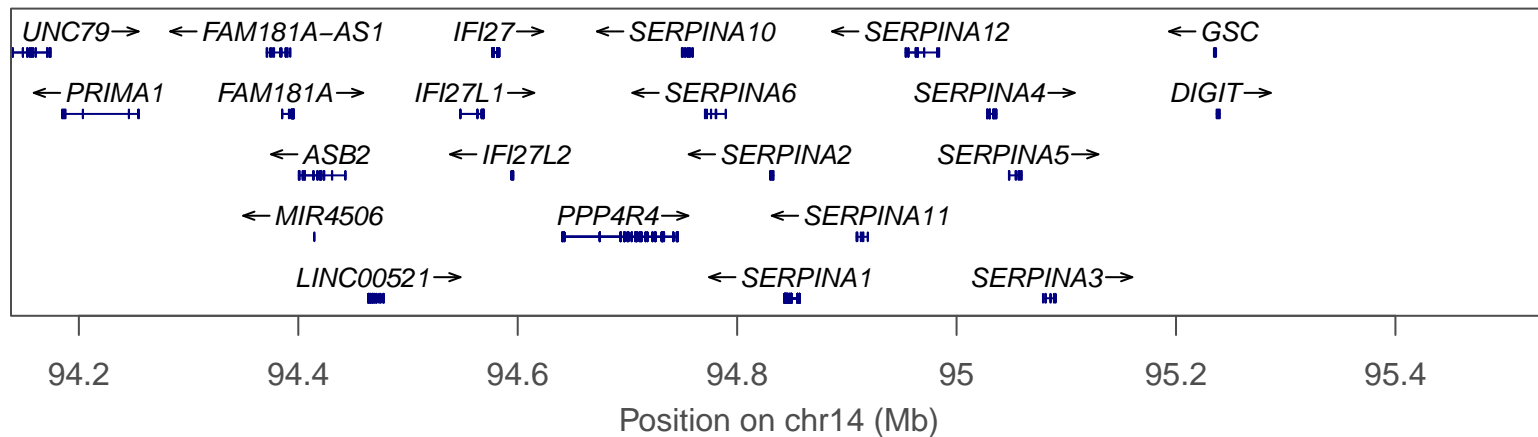

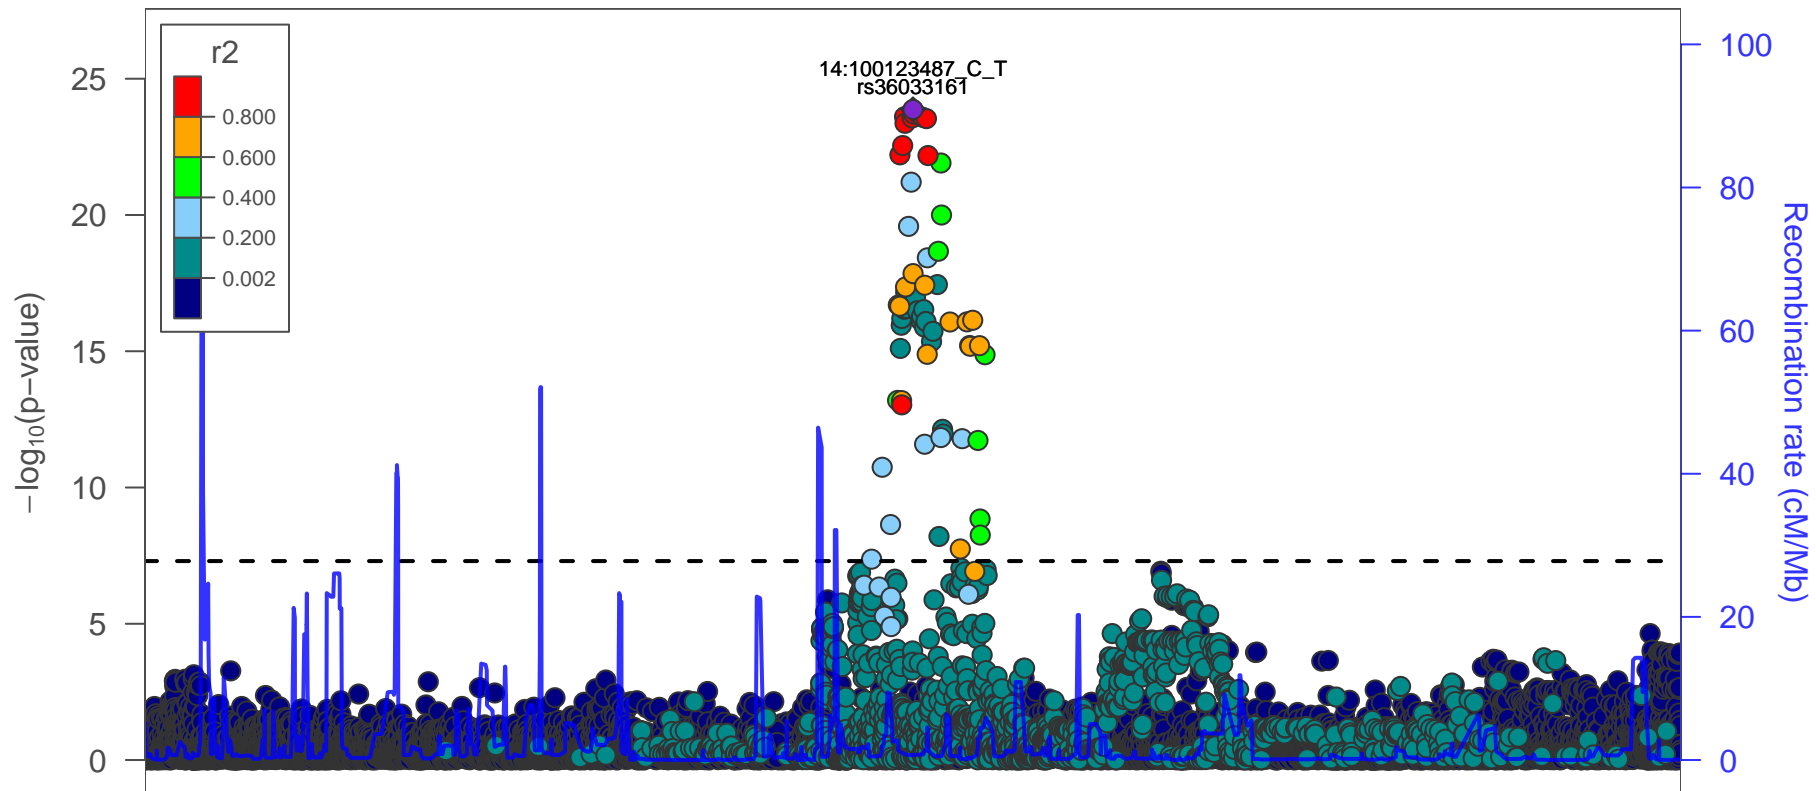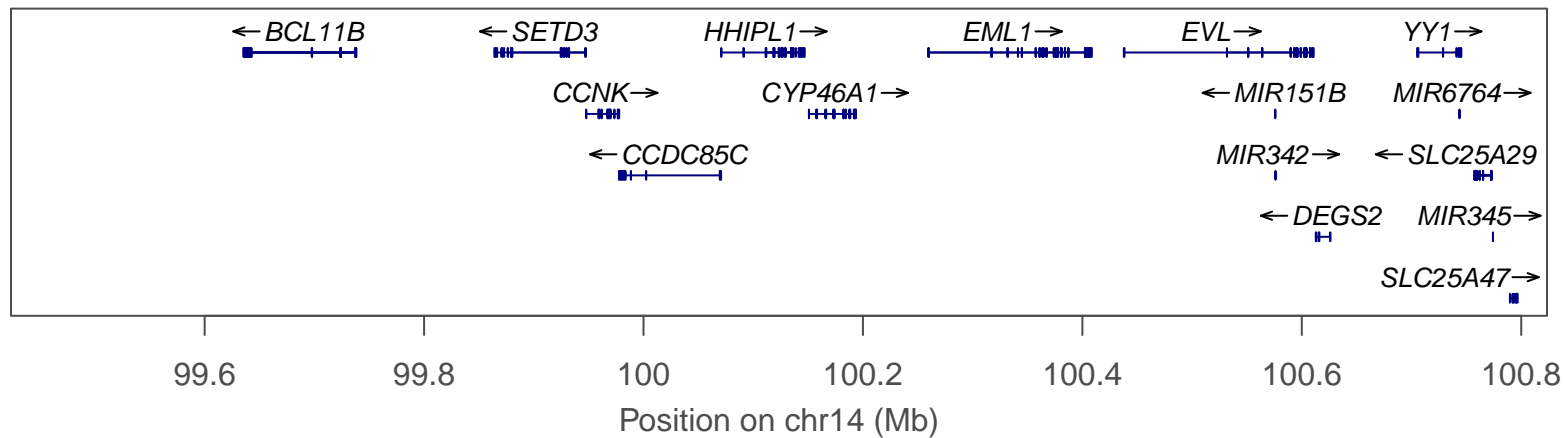

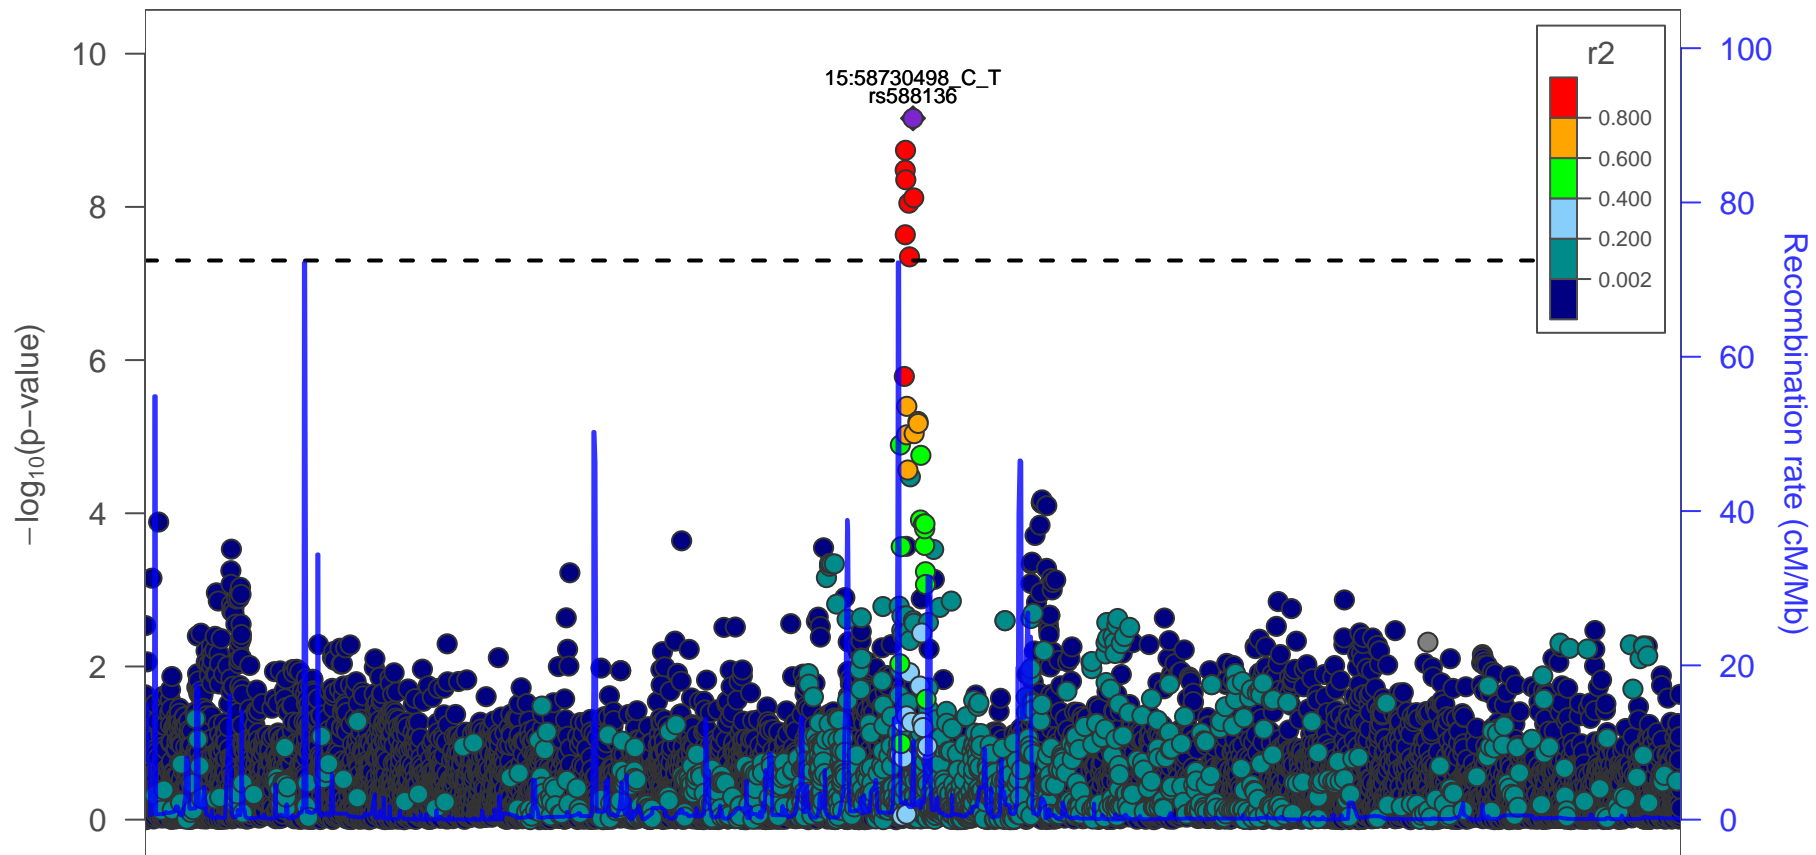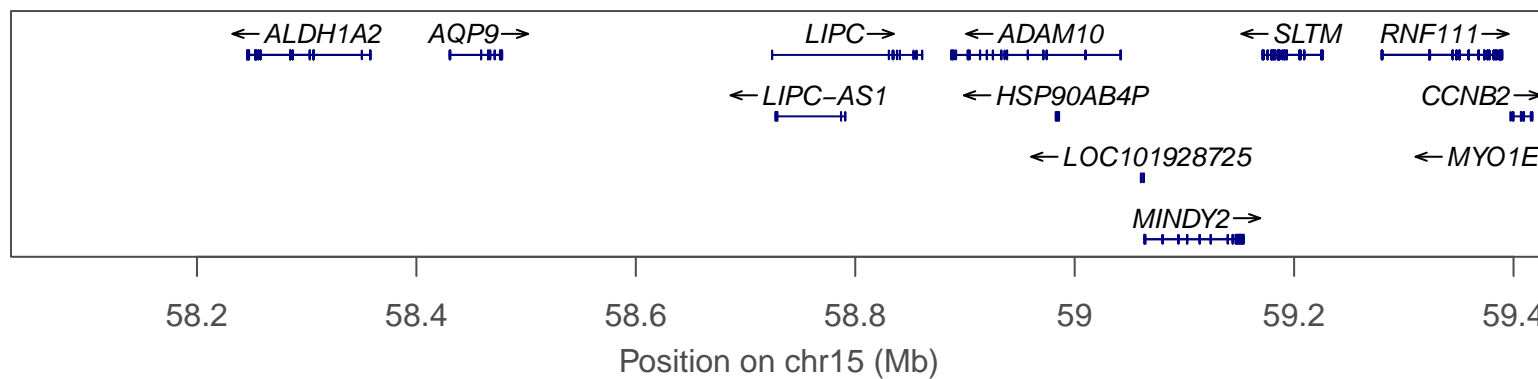

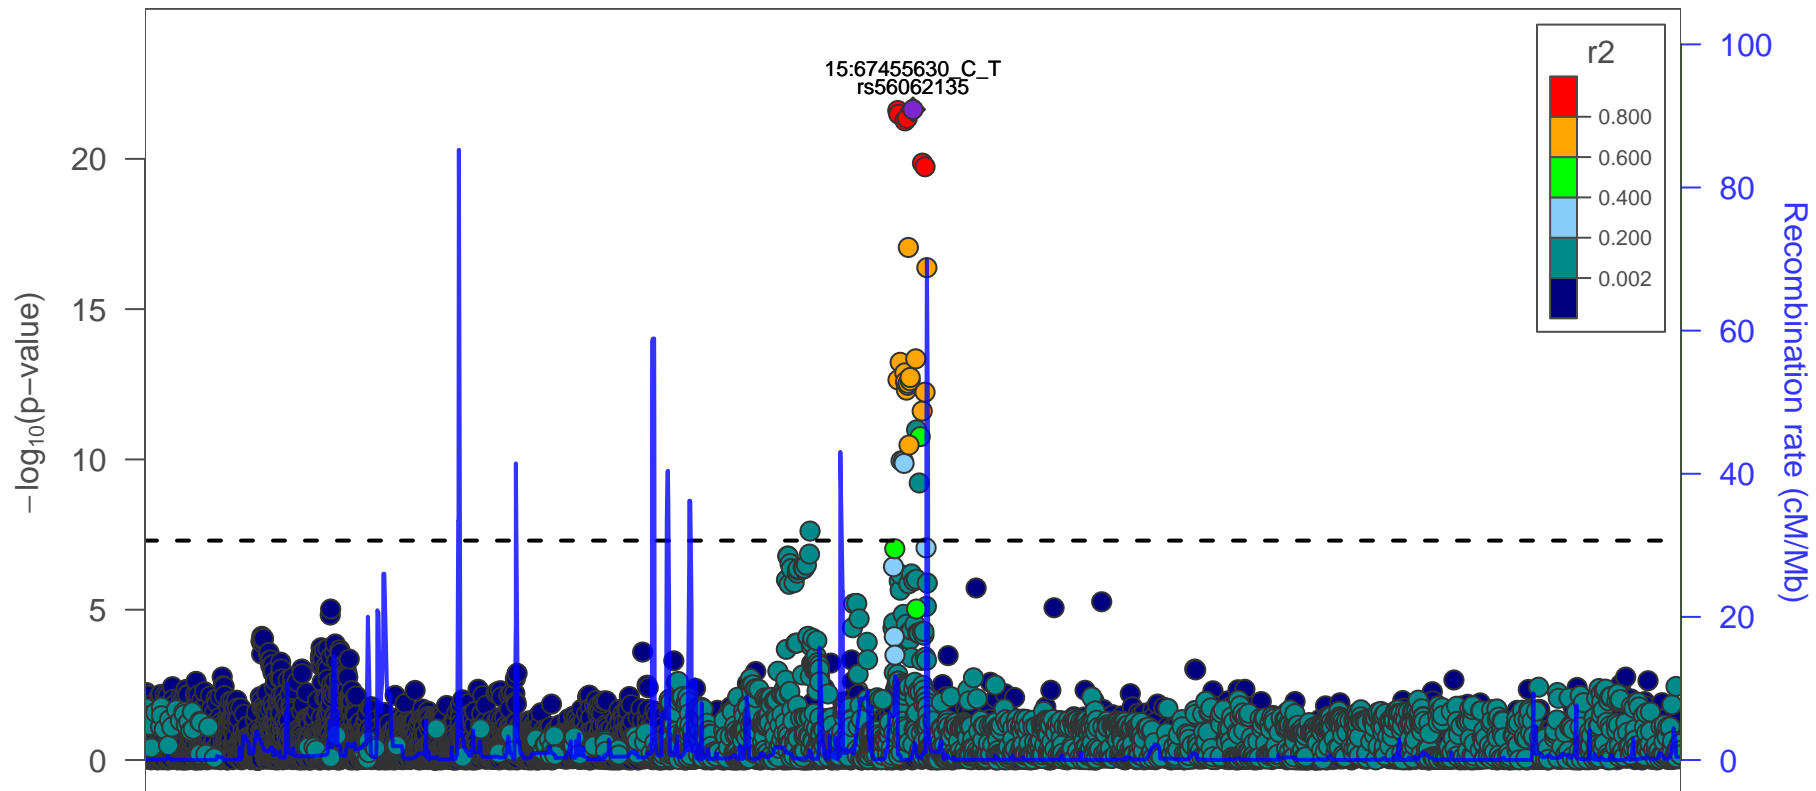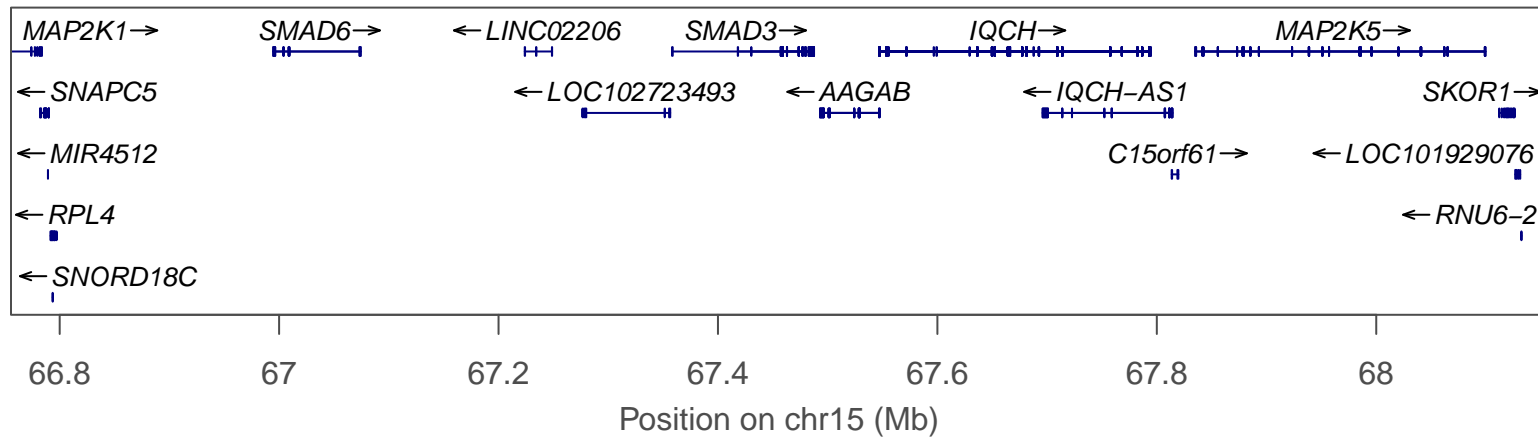

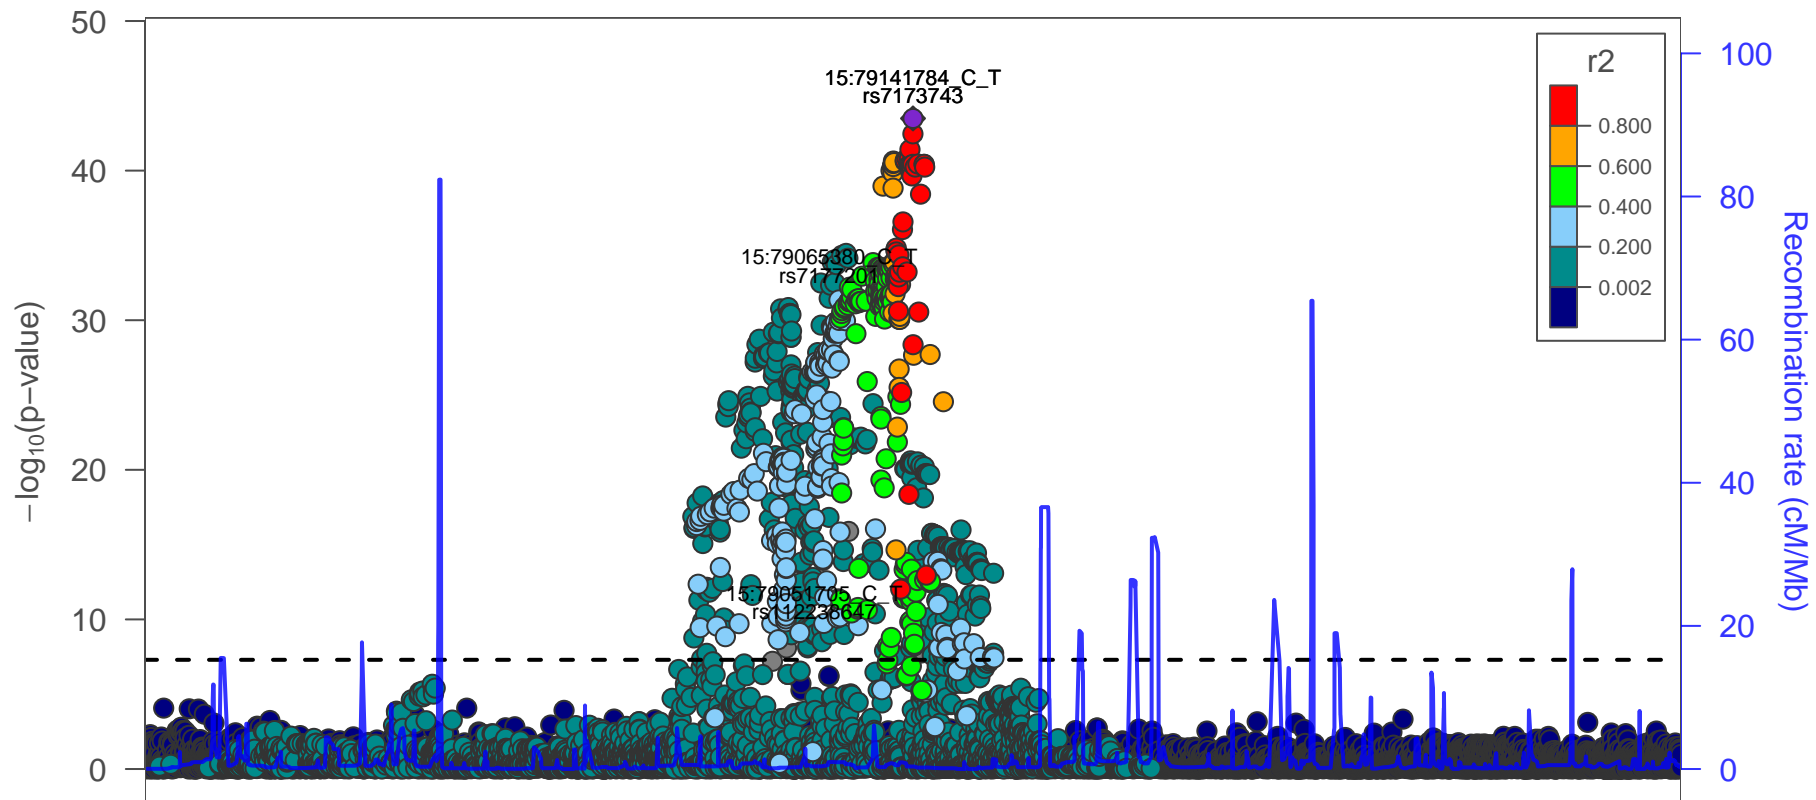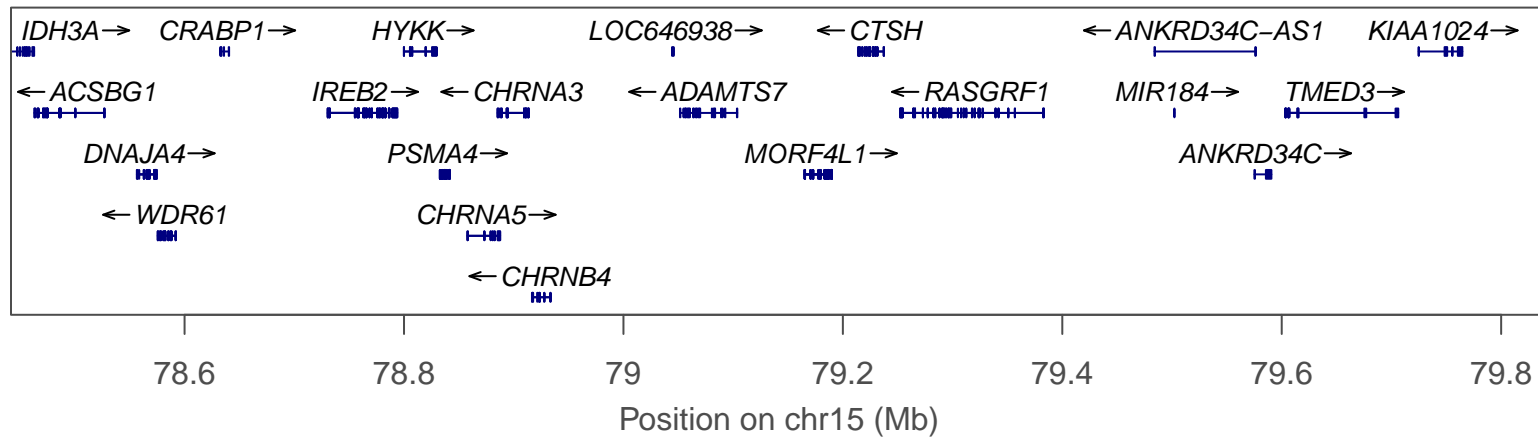

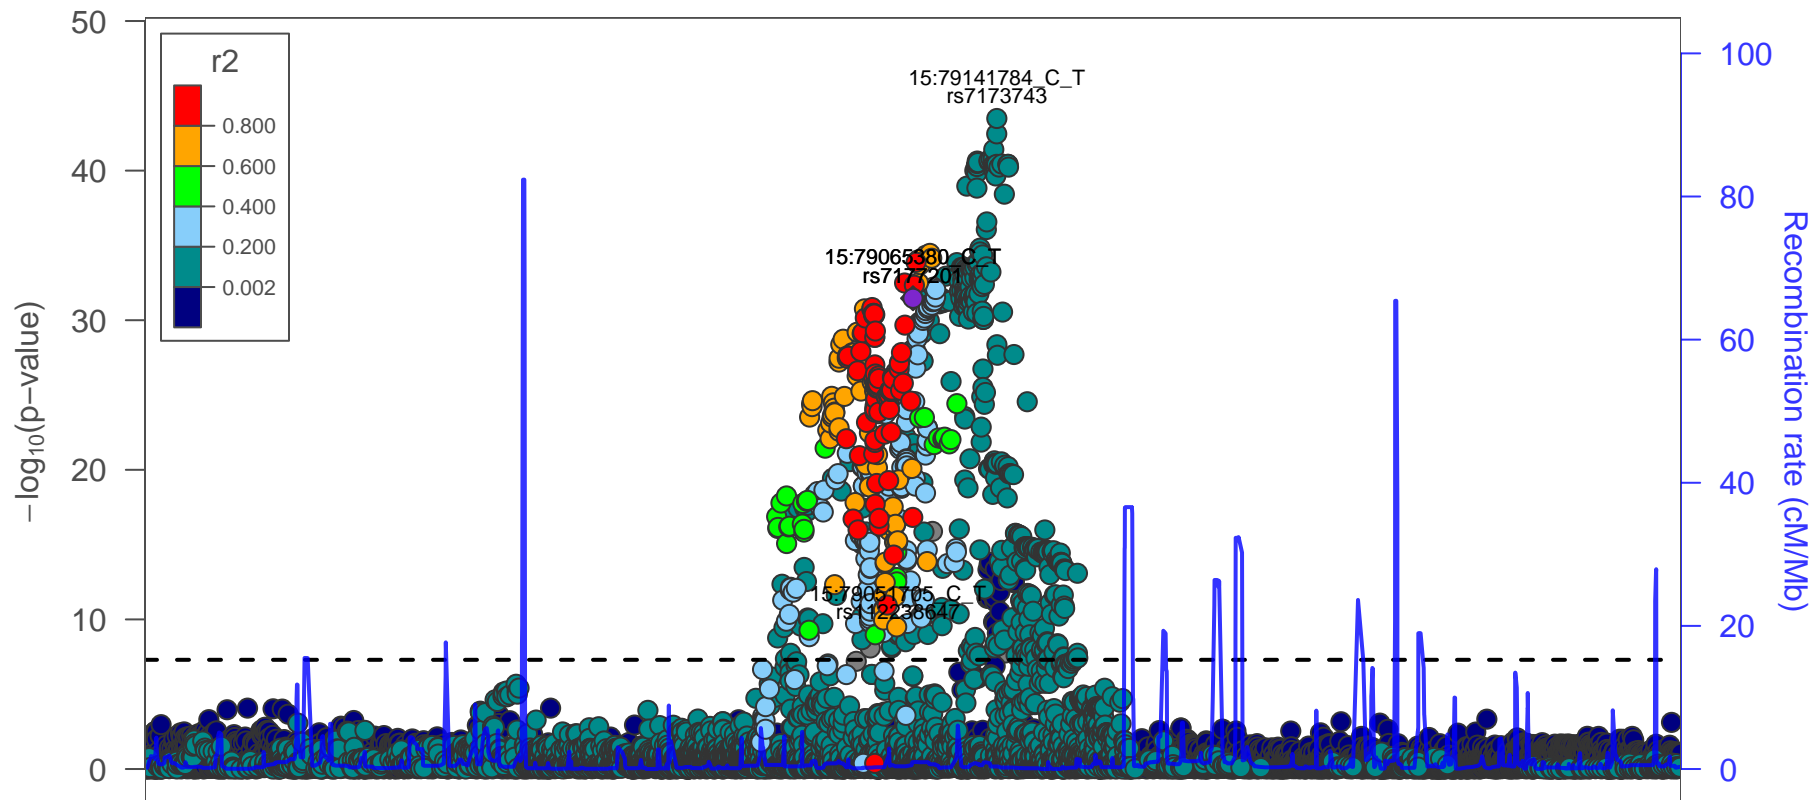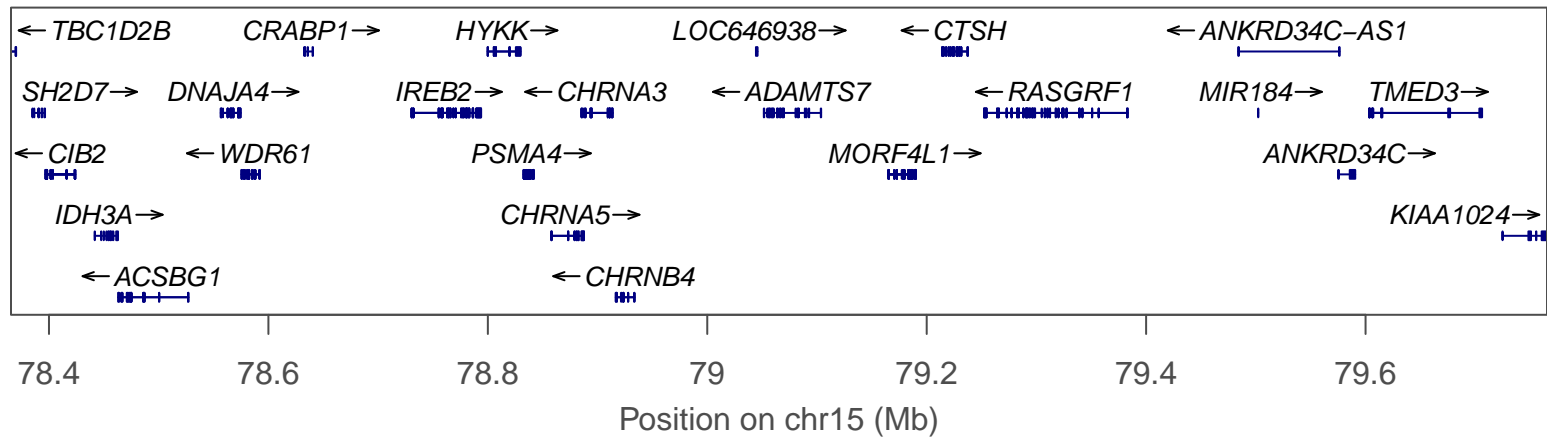

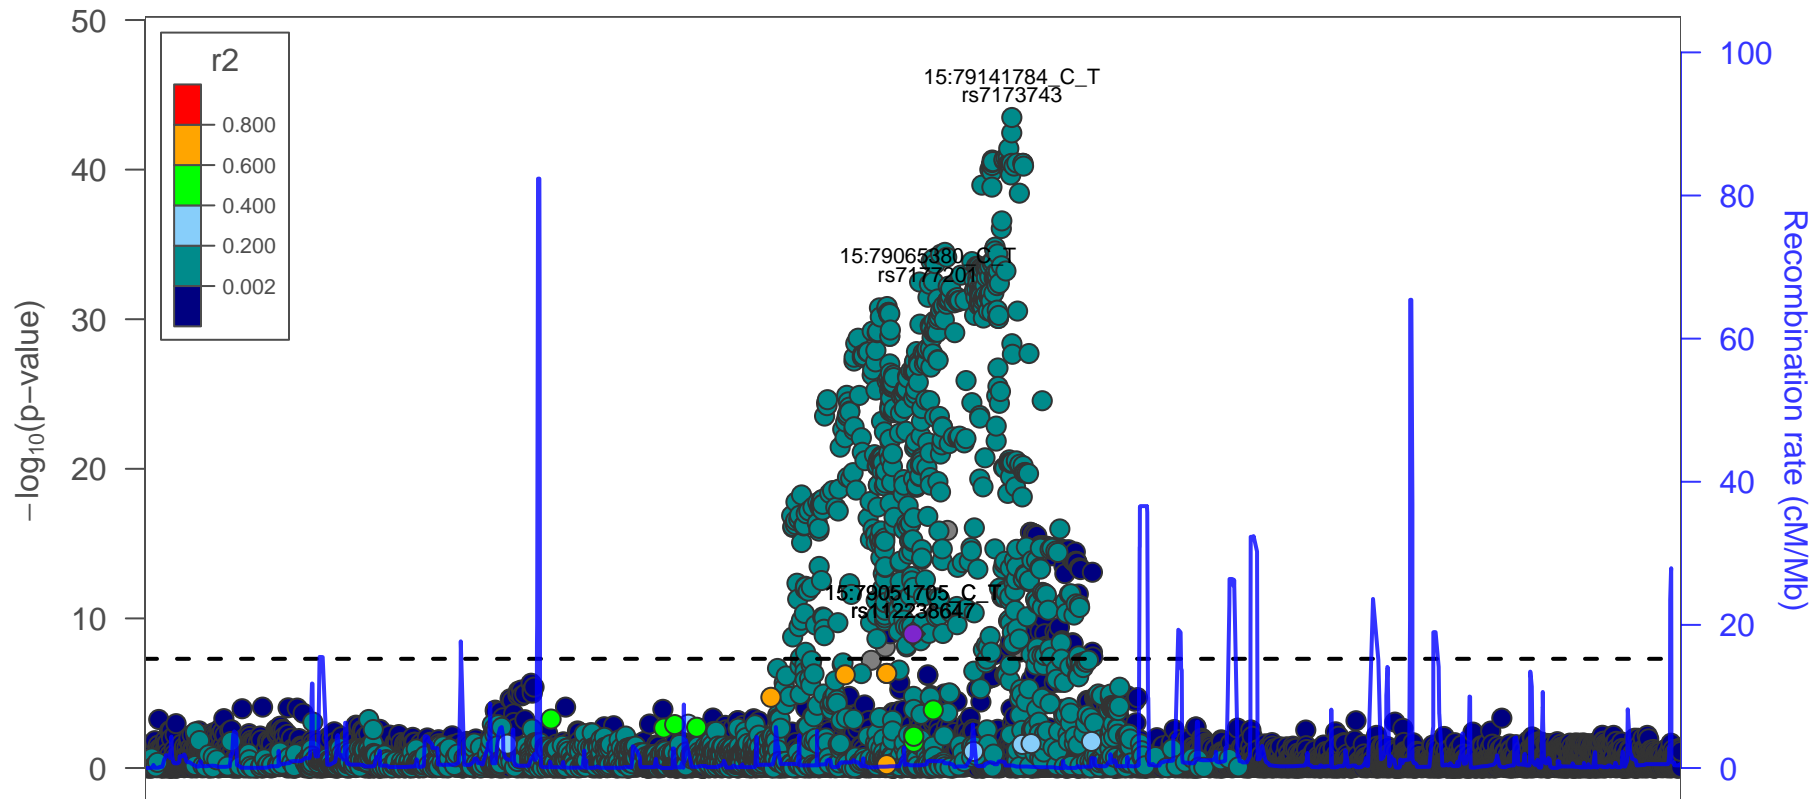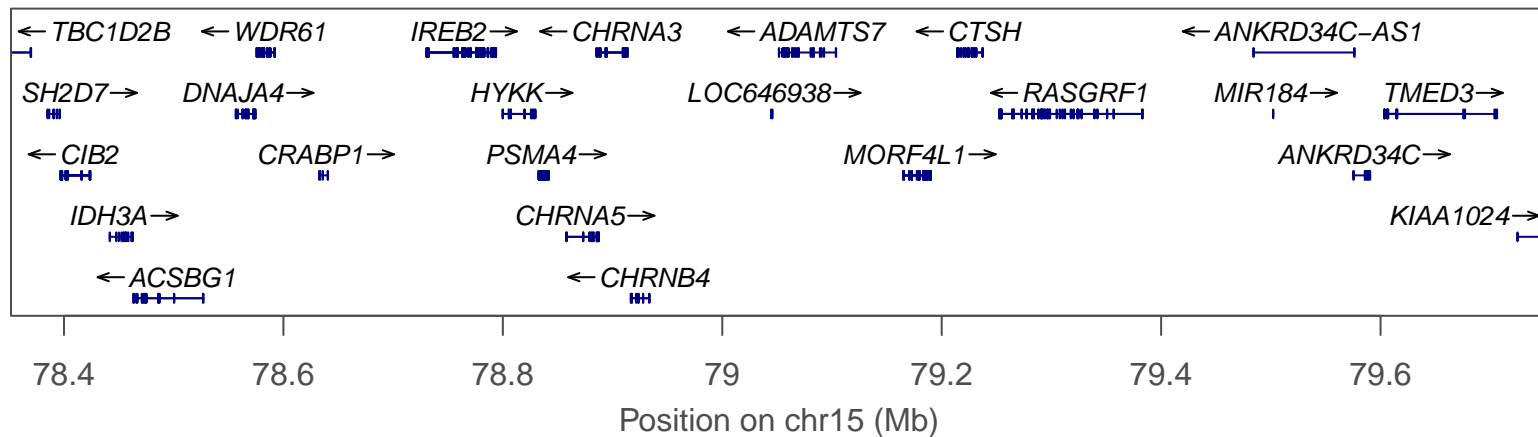

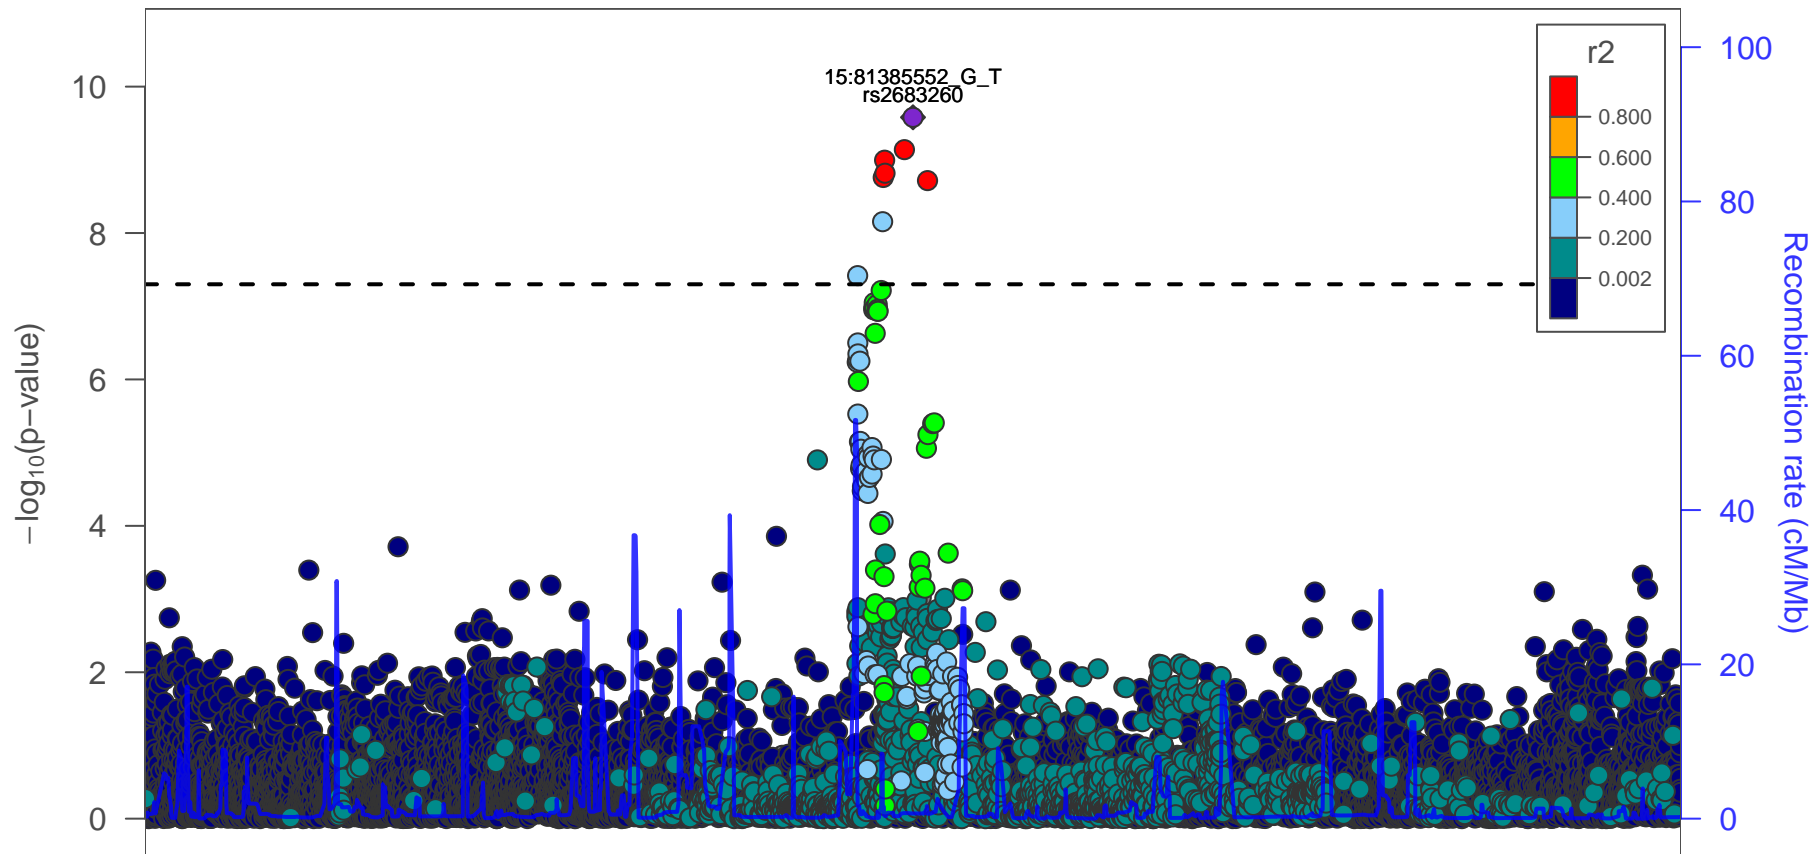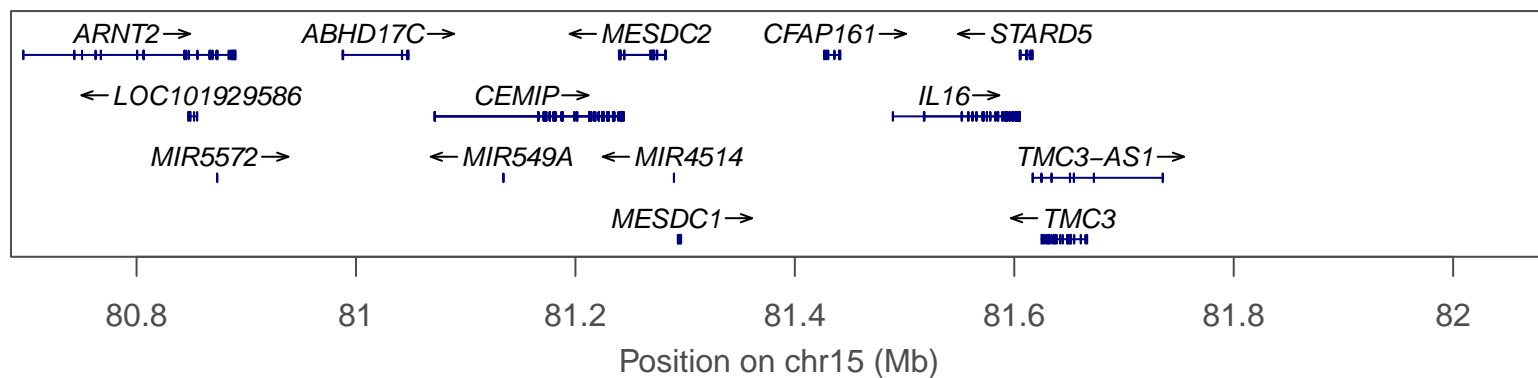



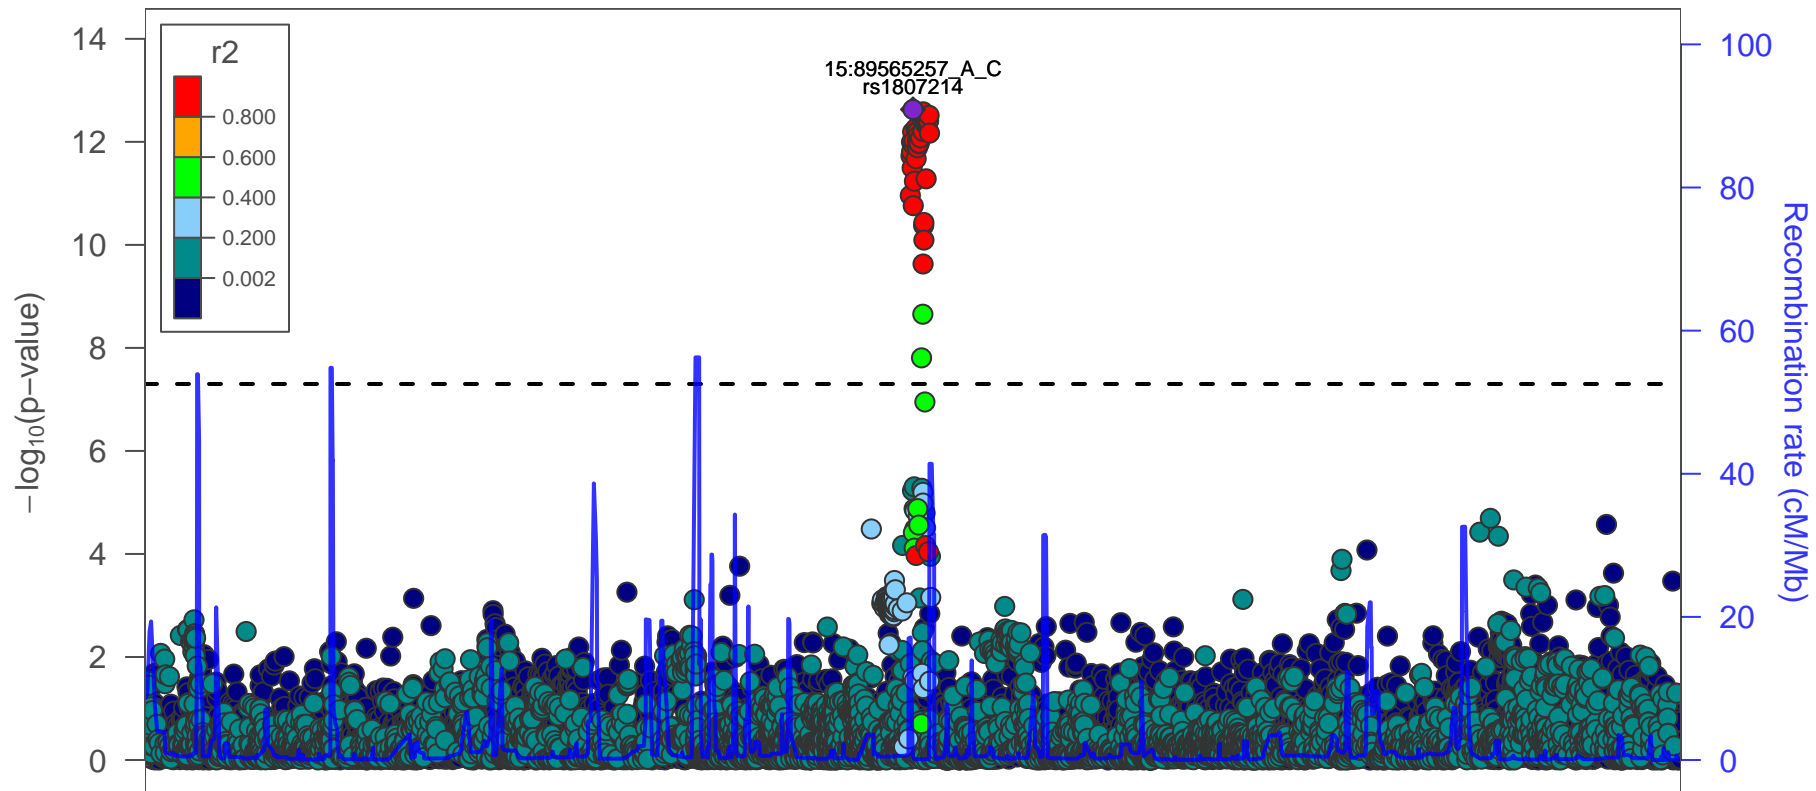

15:89565257 A\_C  
rs1807214

Recombination rate (cM/Mb)

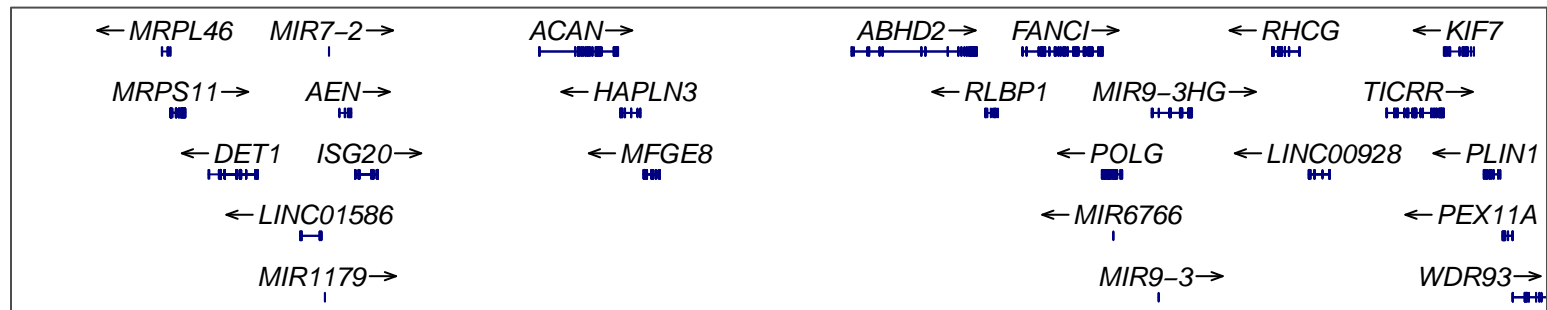

89 89.2 89.4 89.6 89.8 90 90.2

Position on chr15 (Mb)

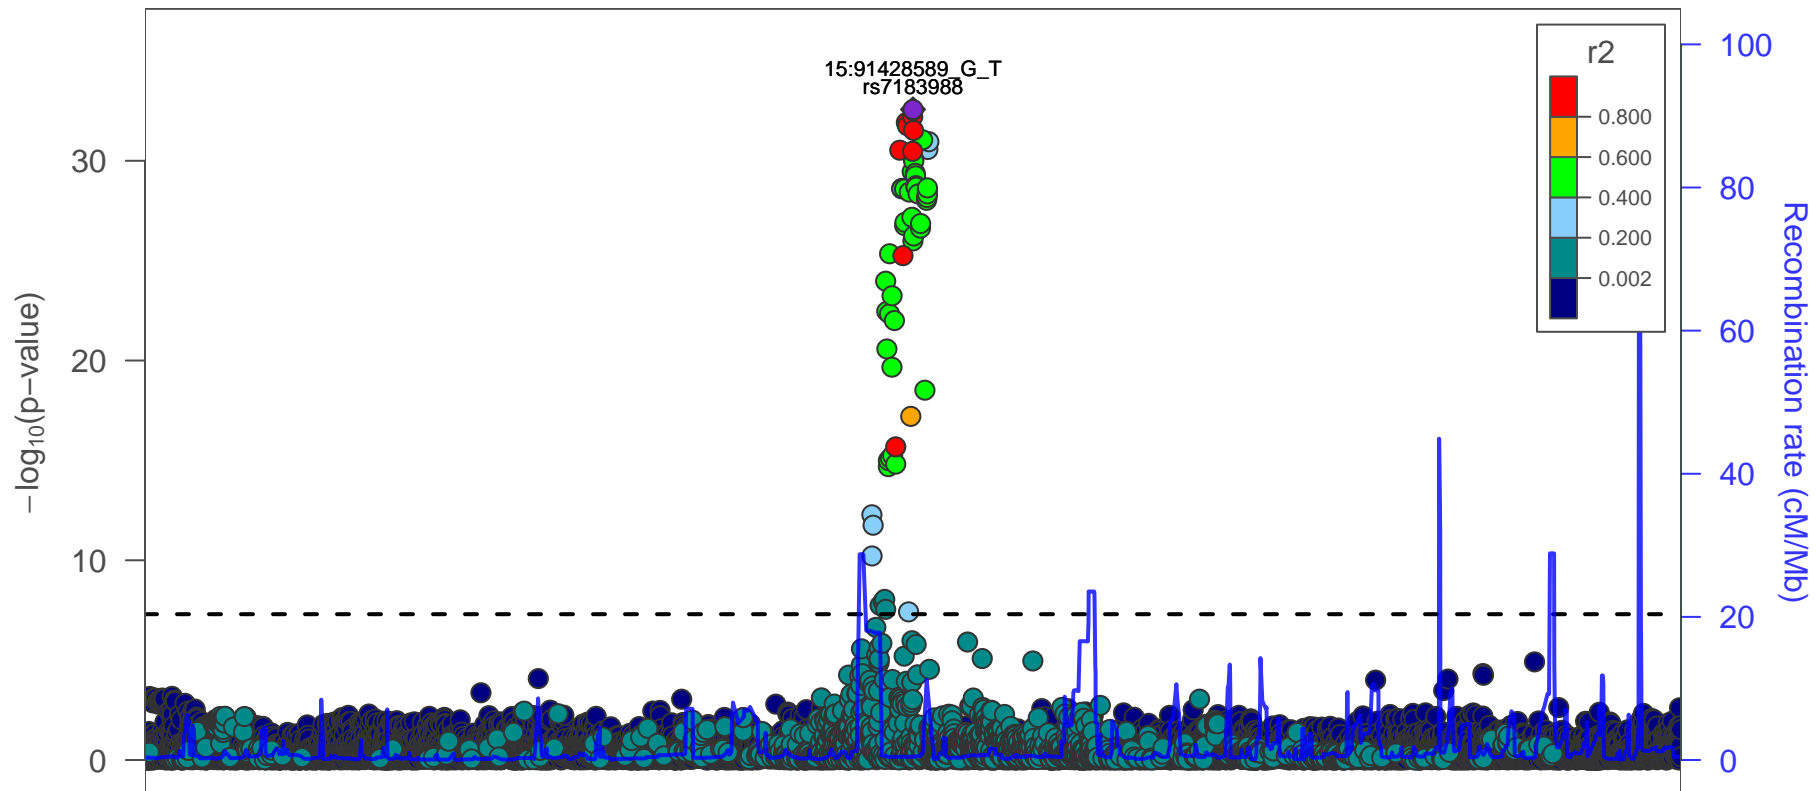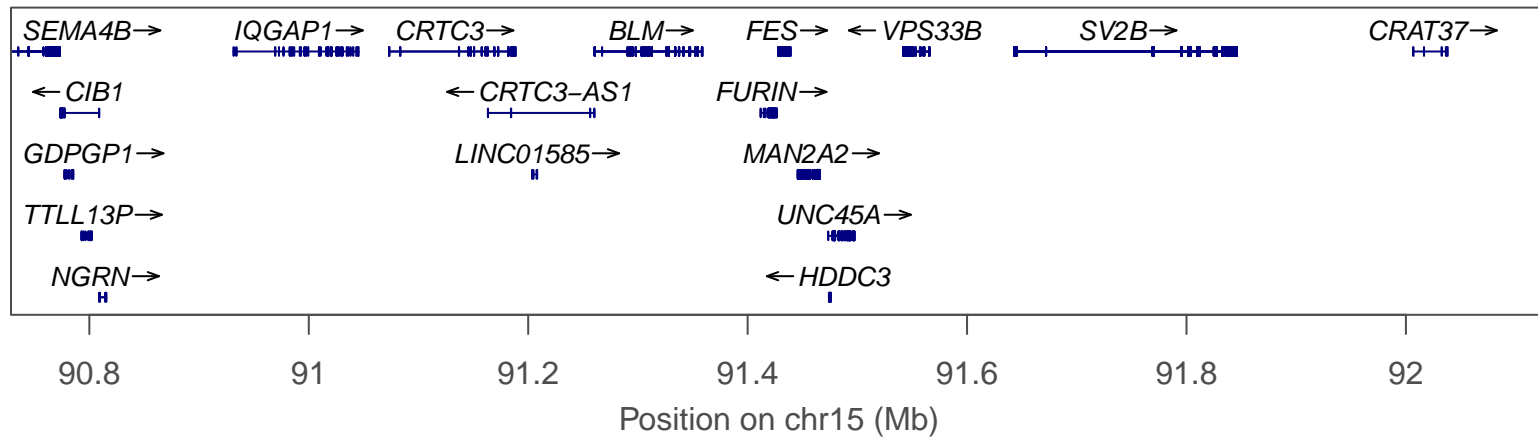

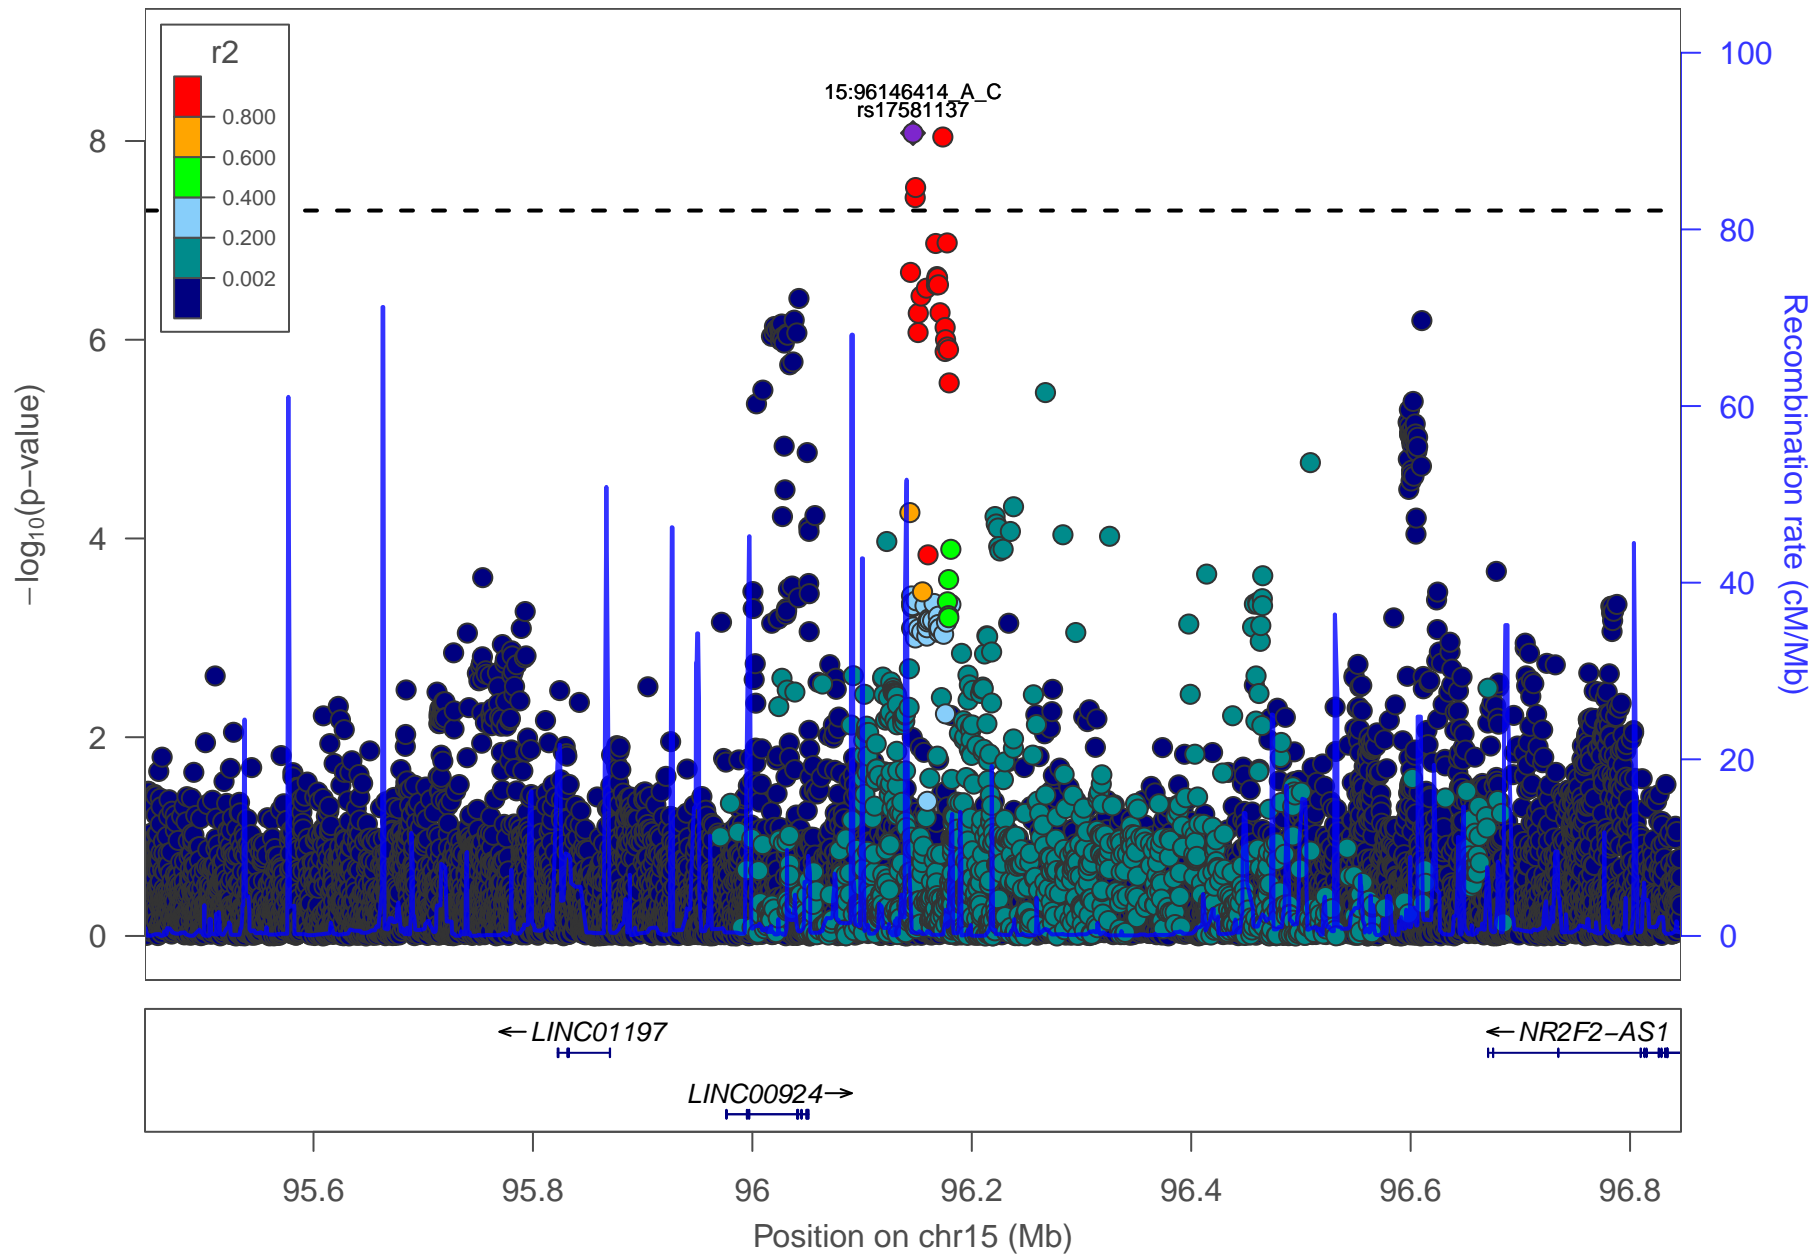

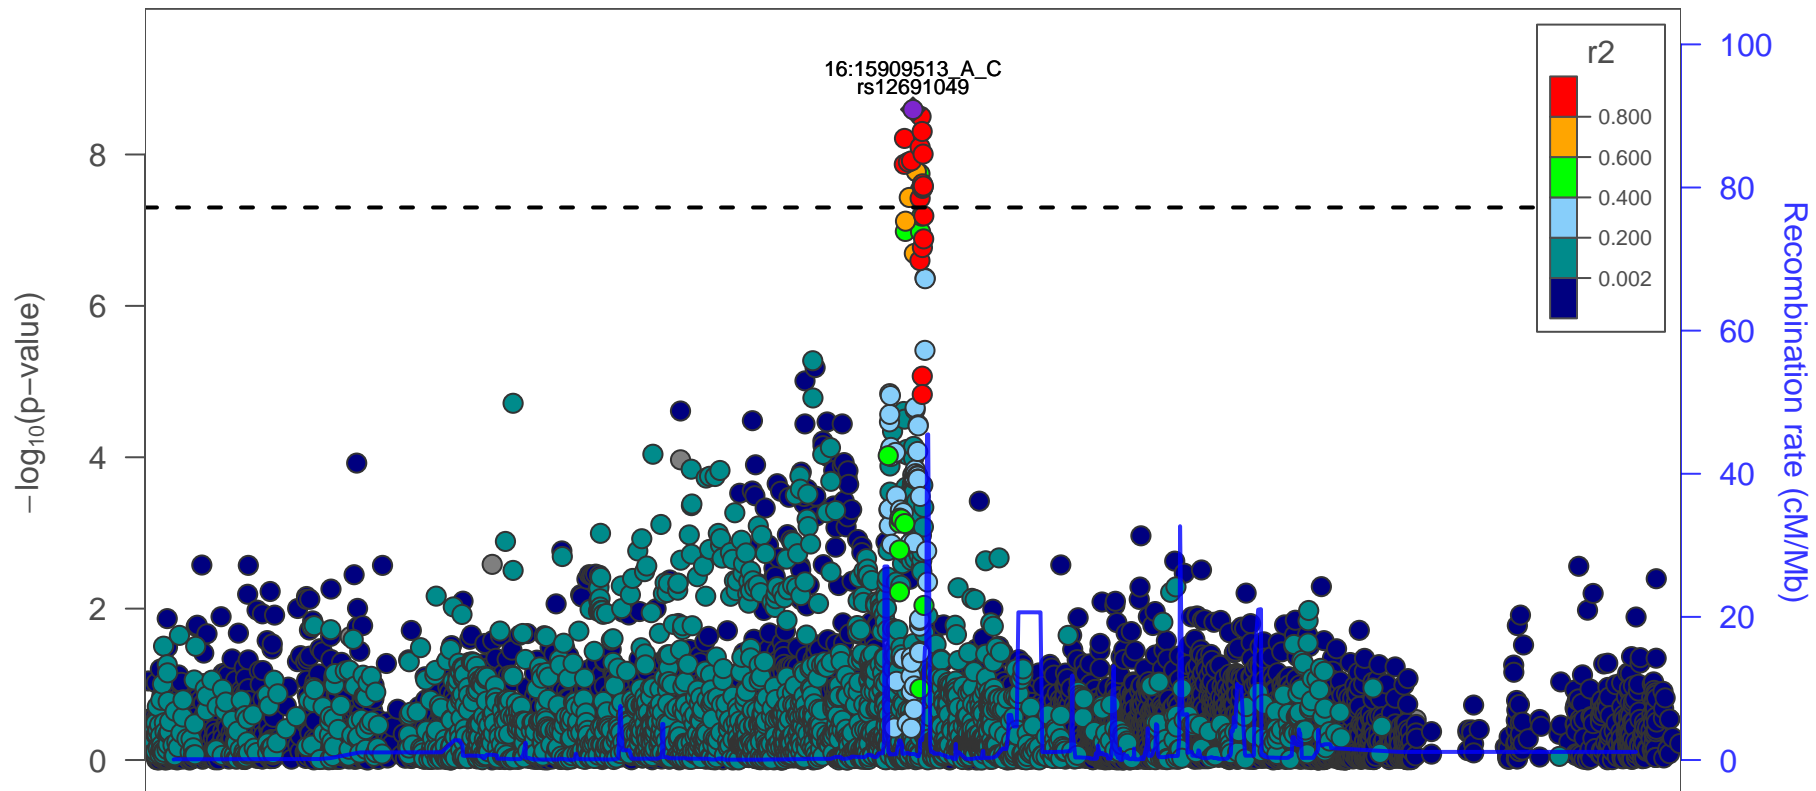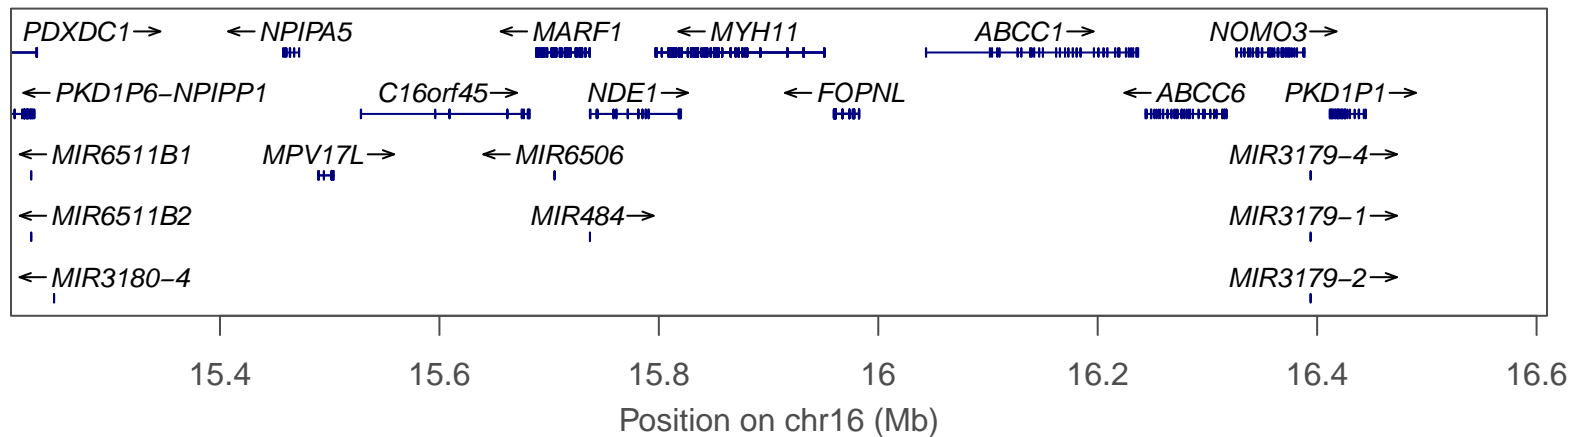

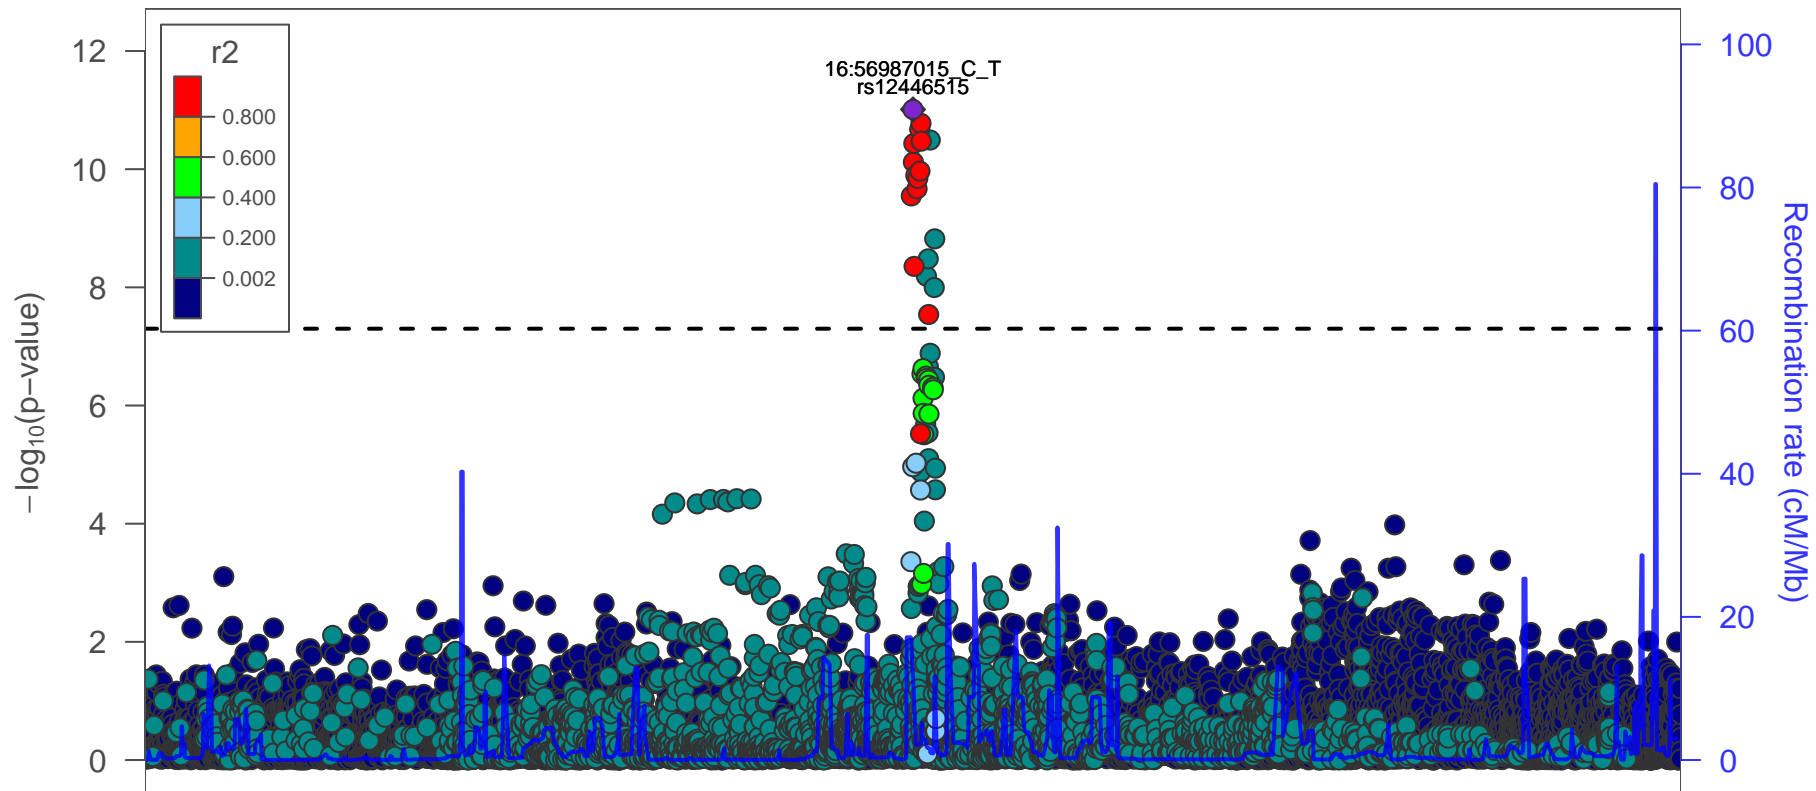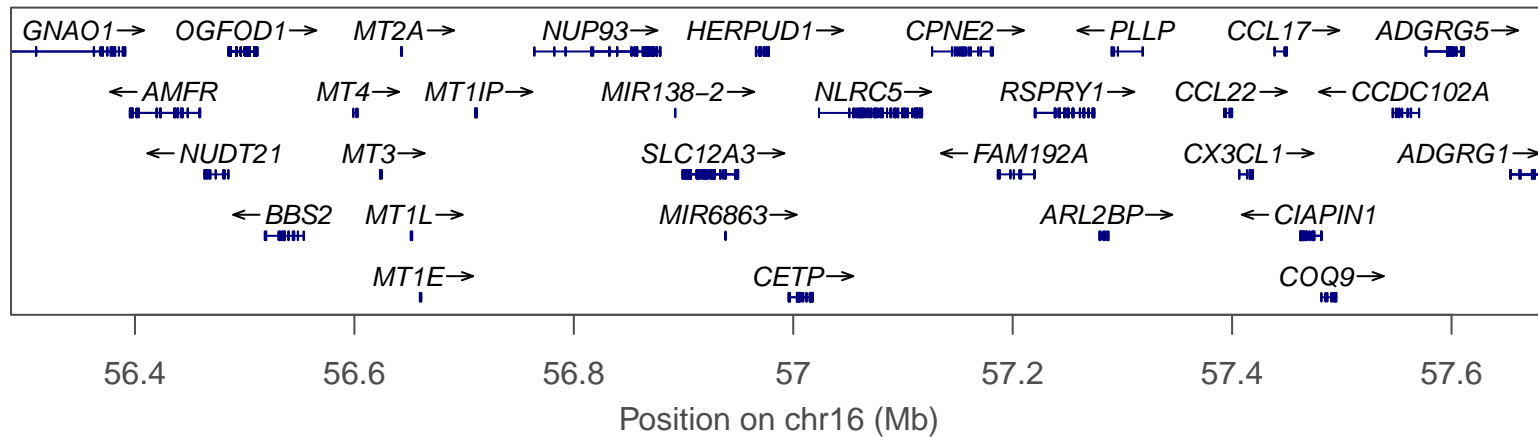

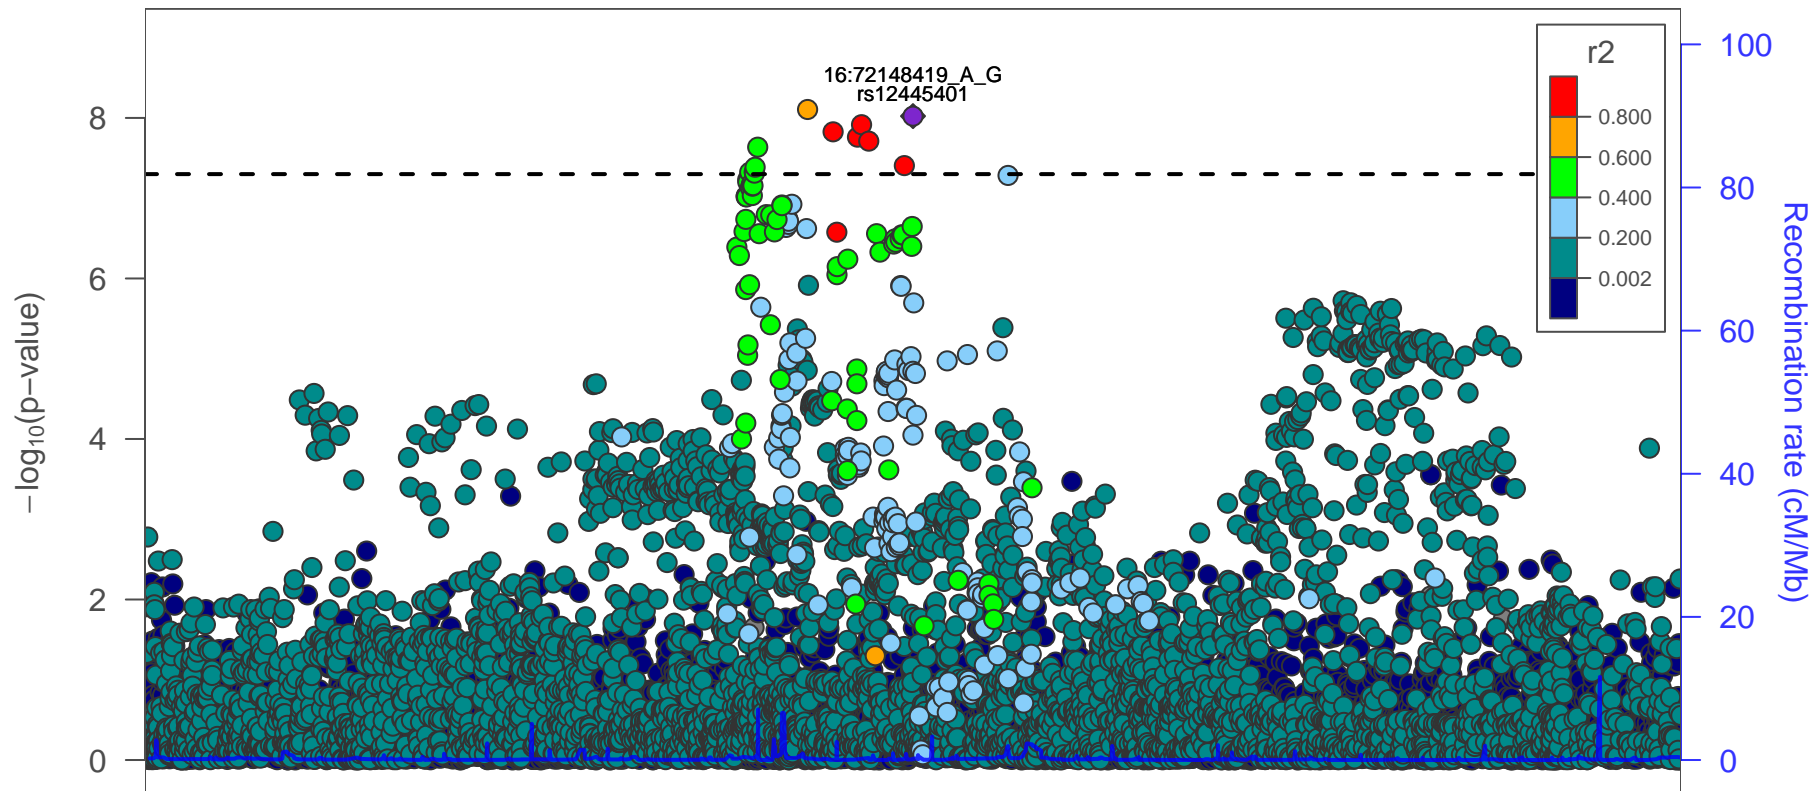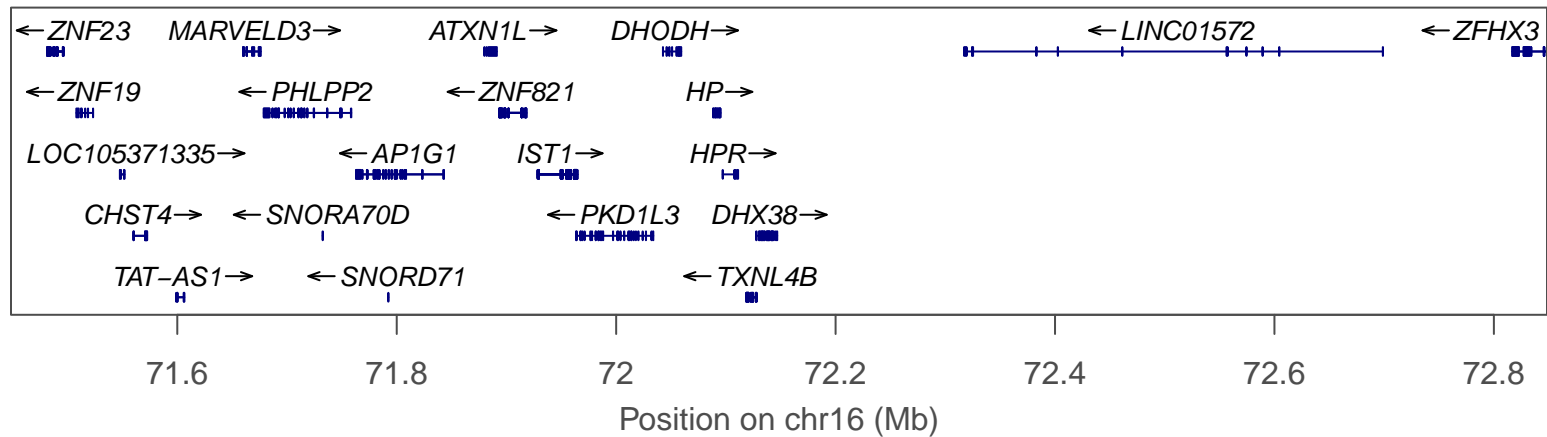

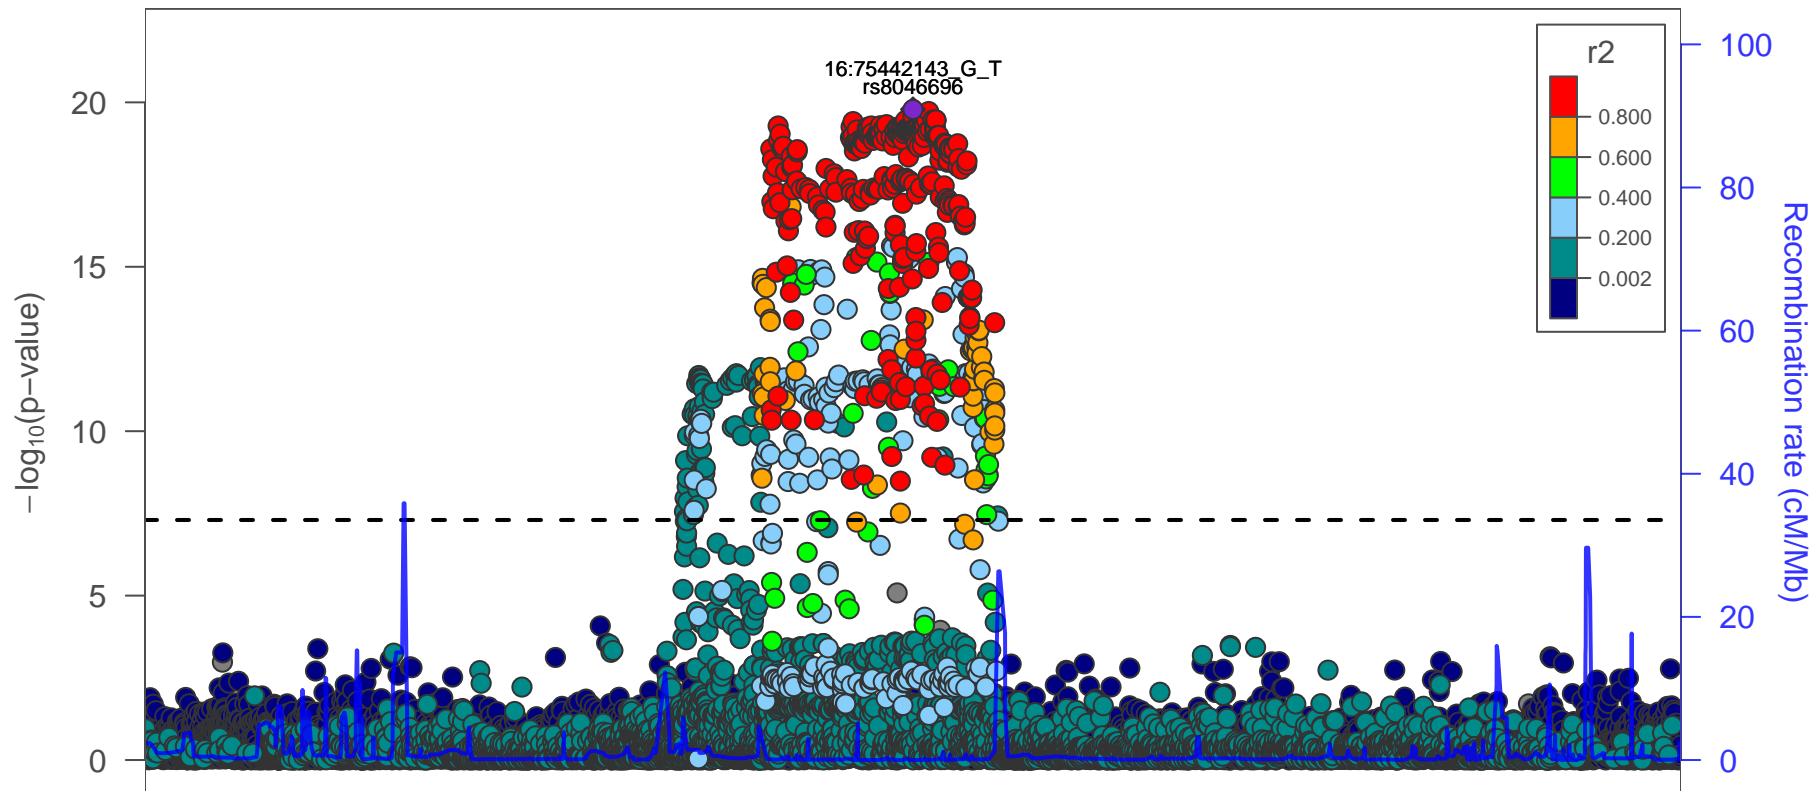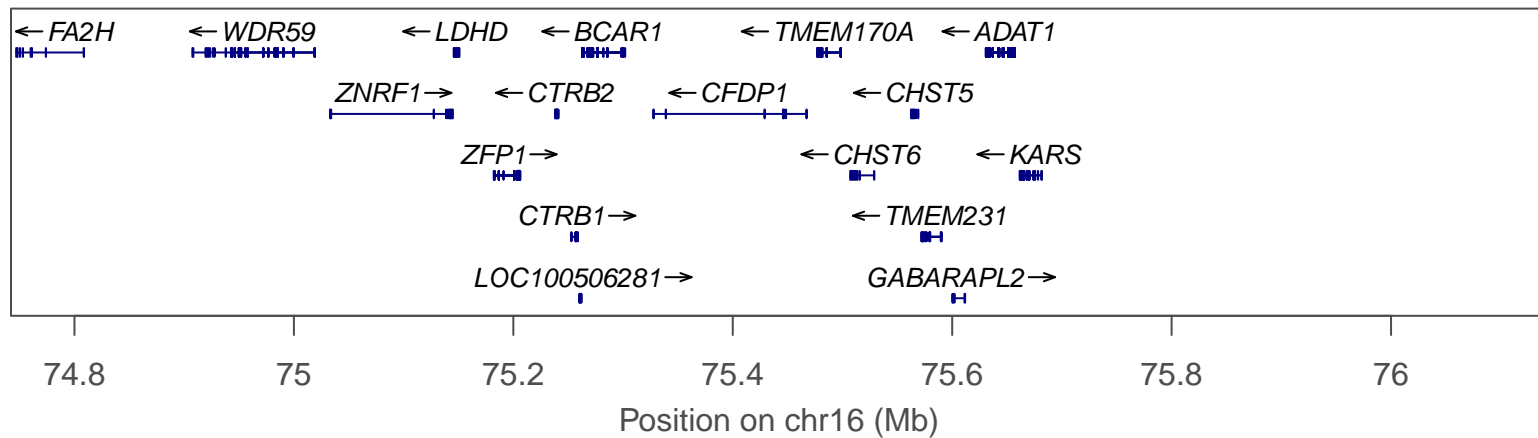

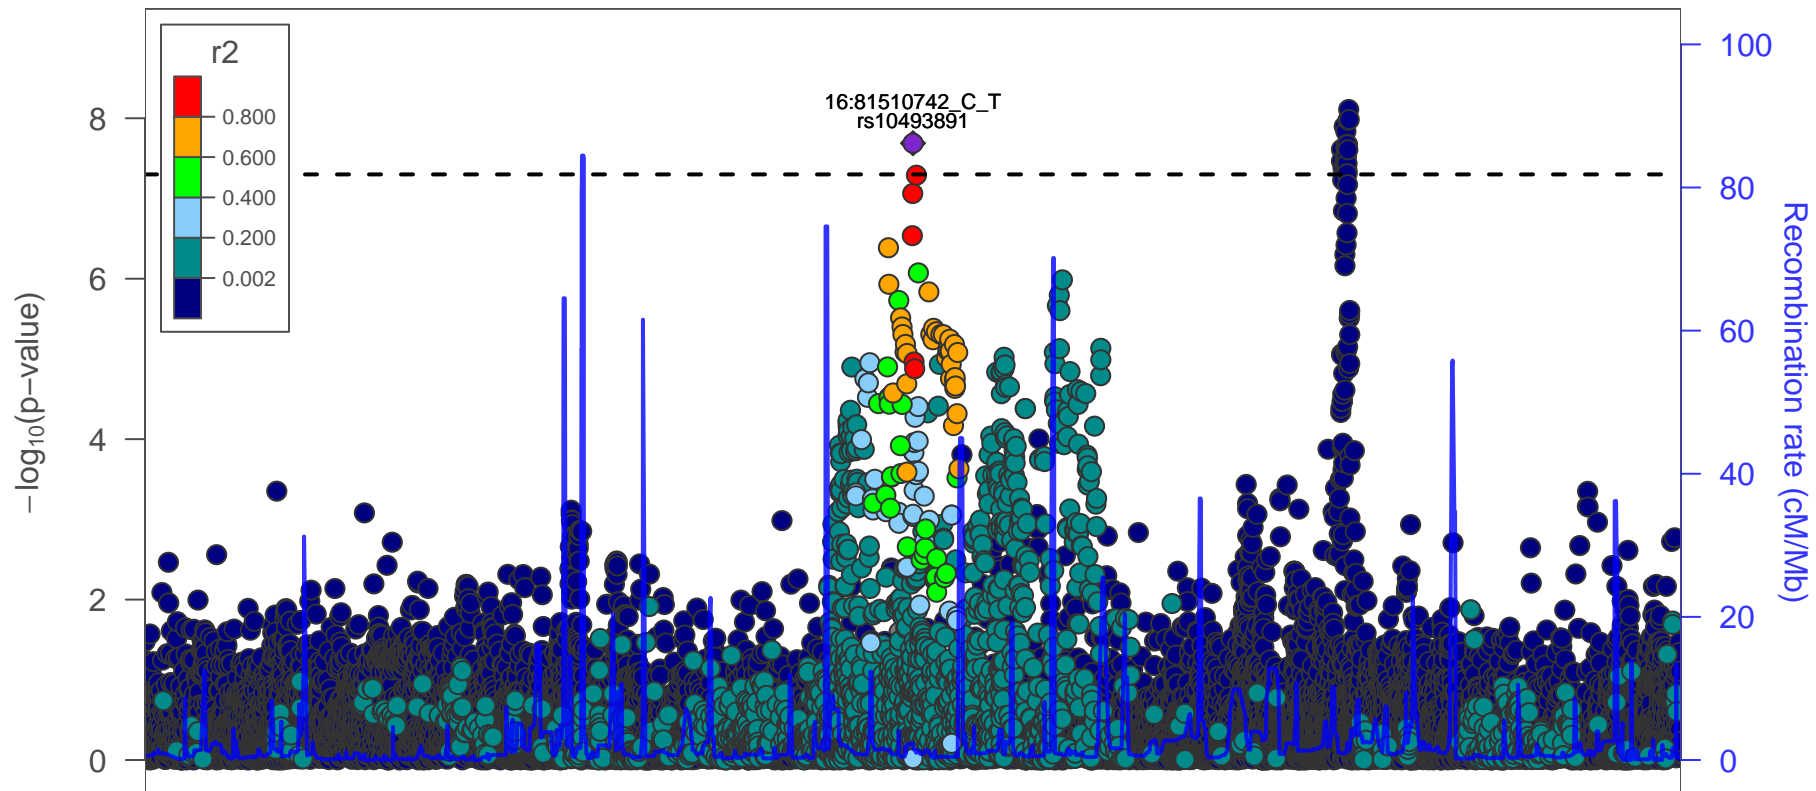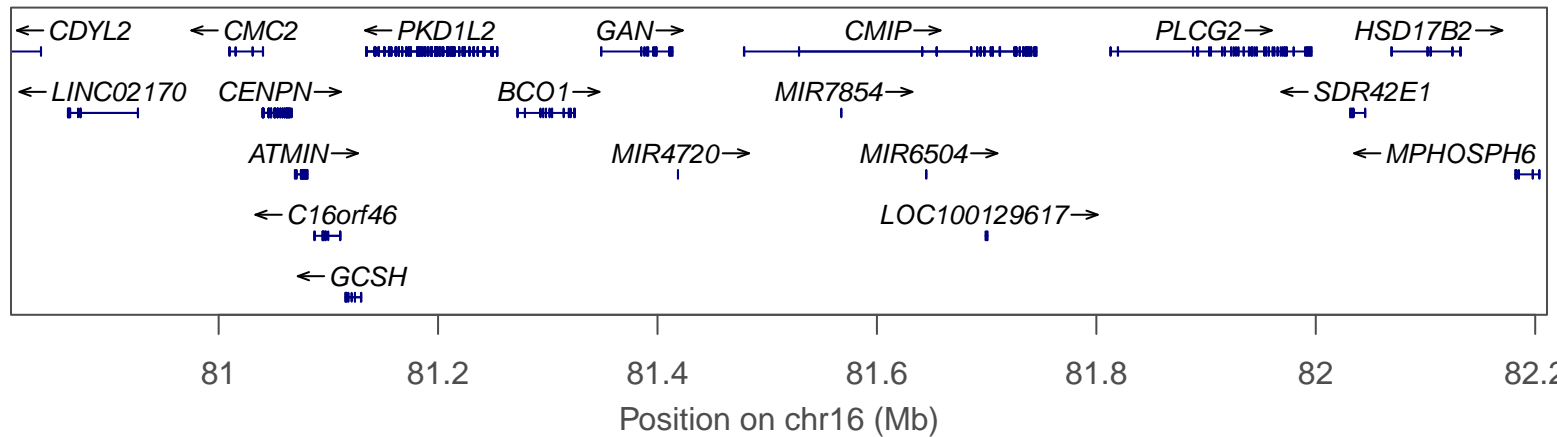



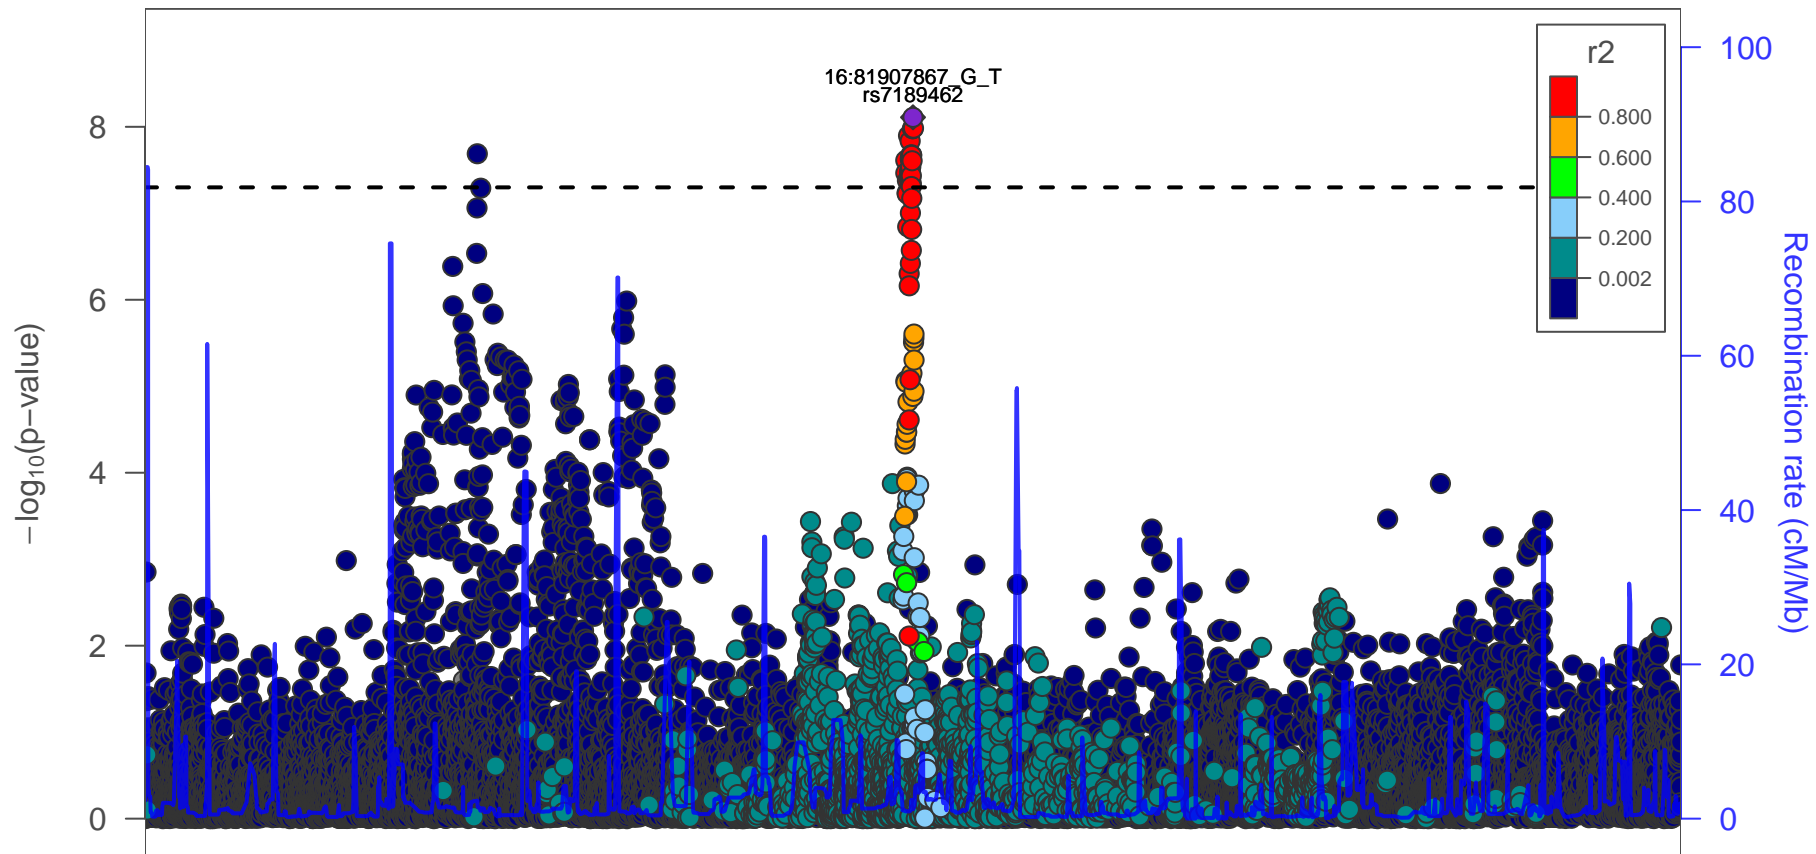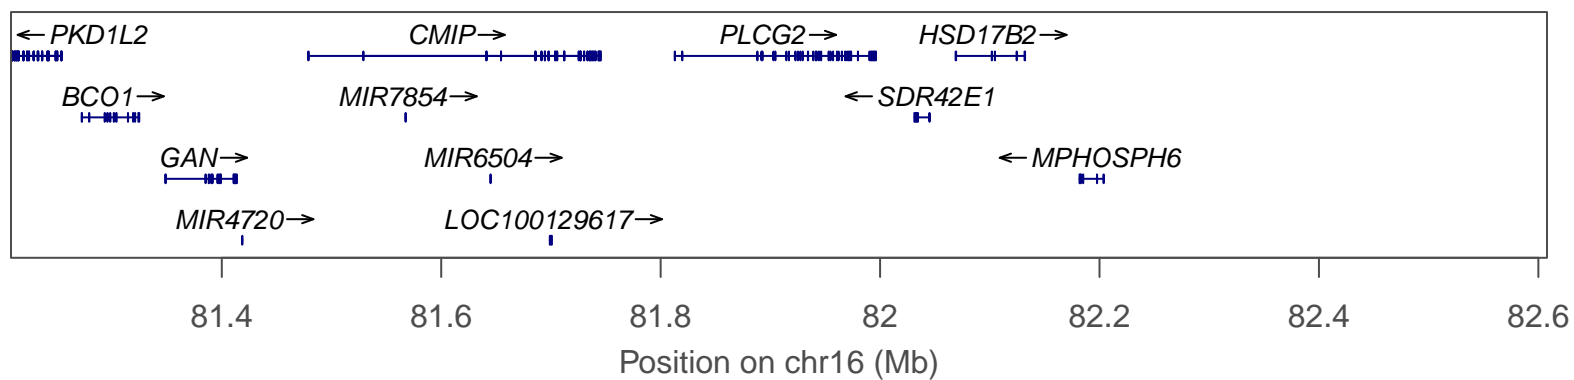



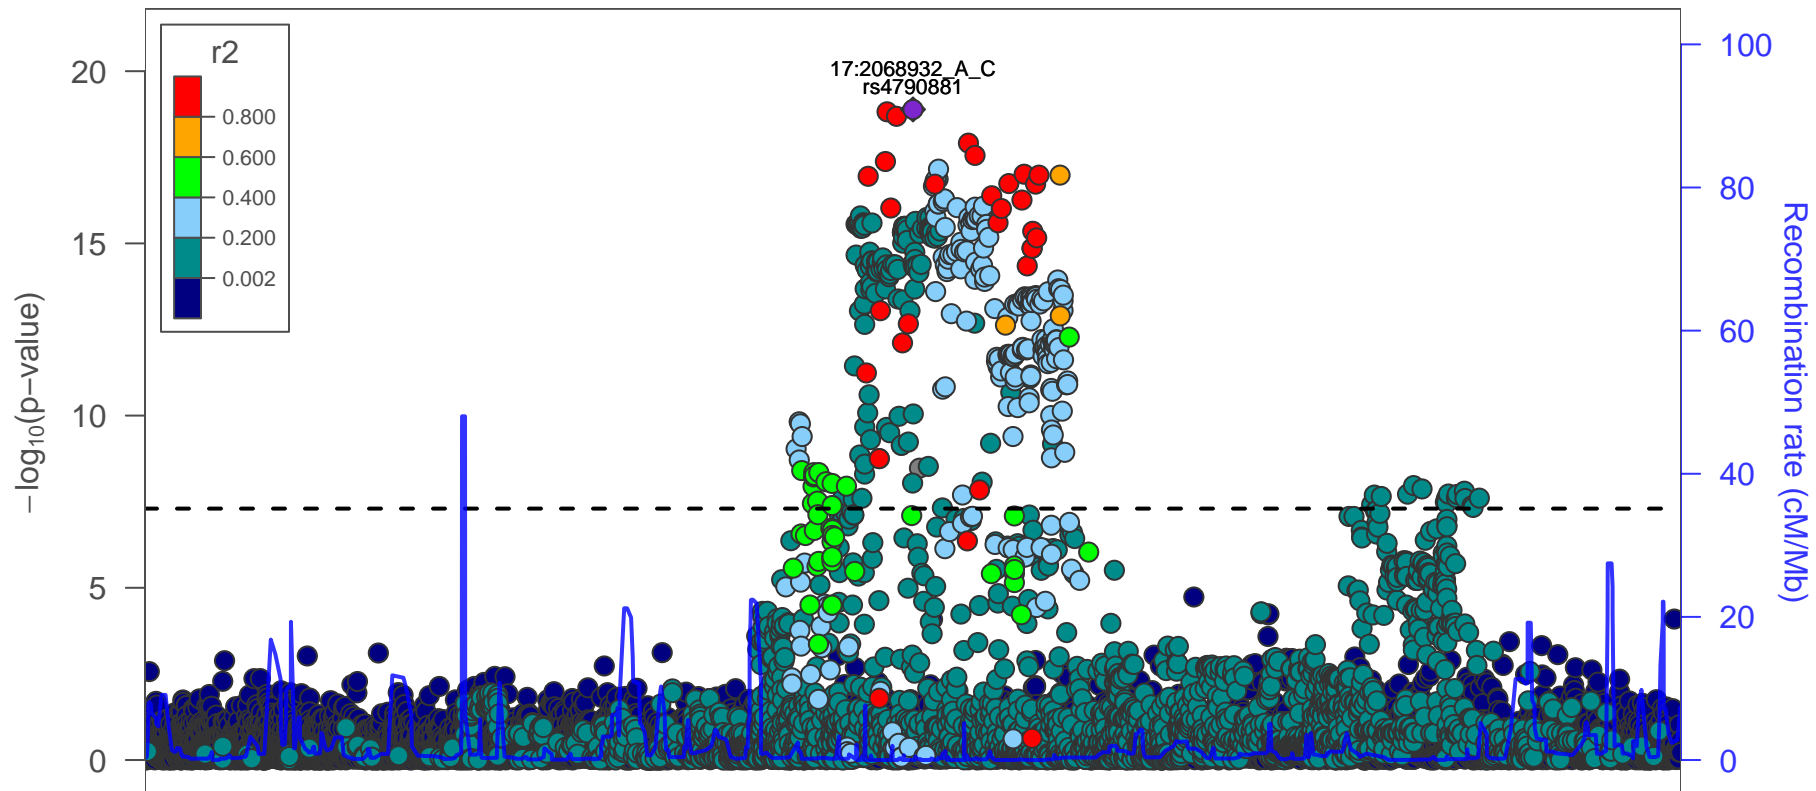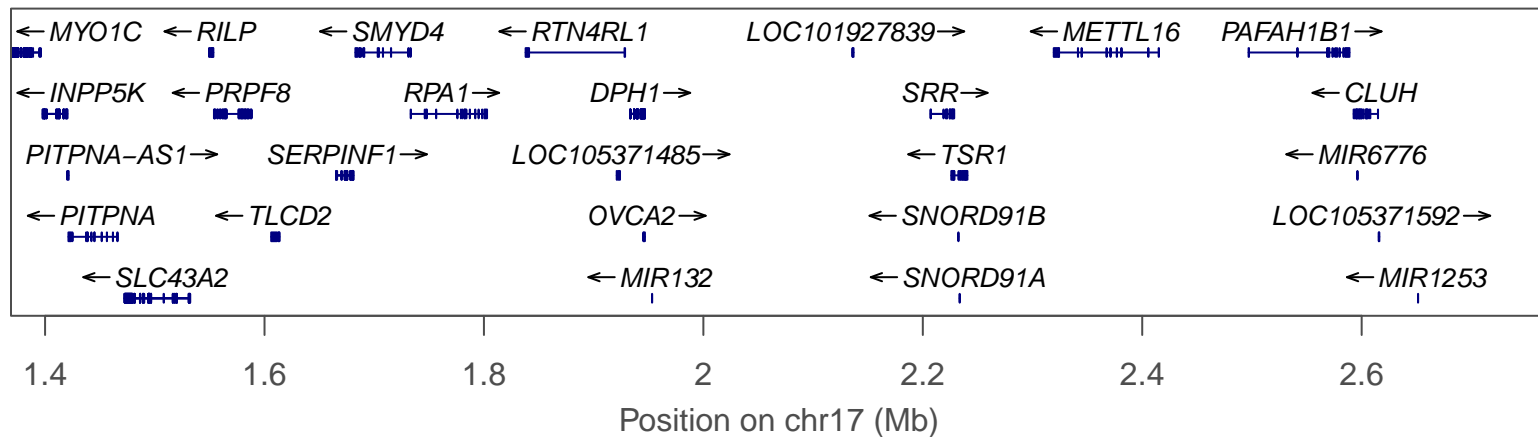

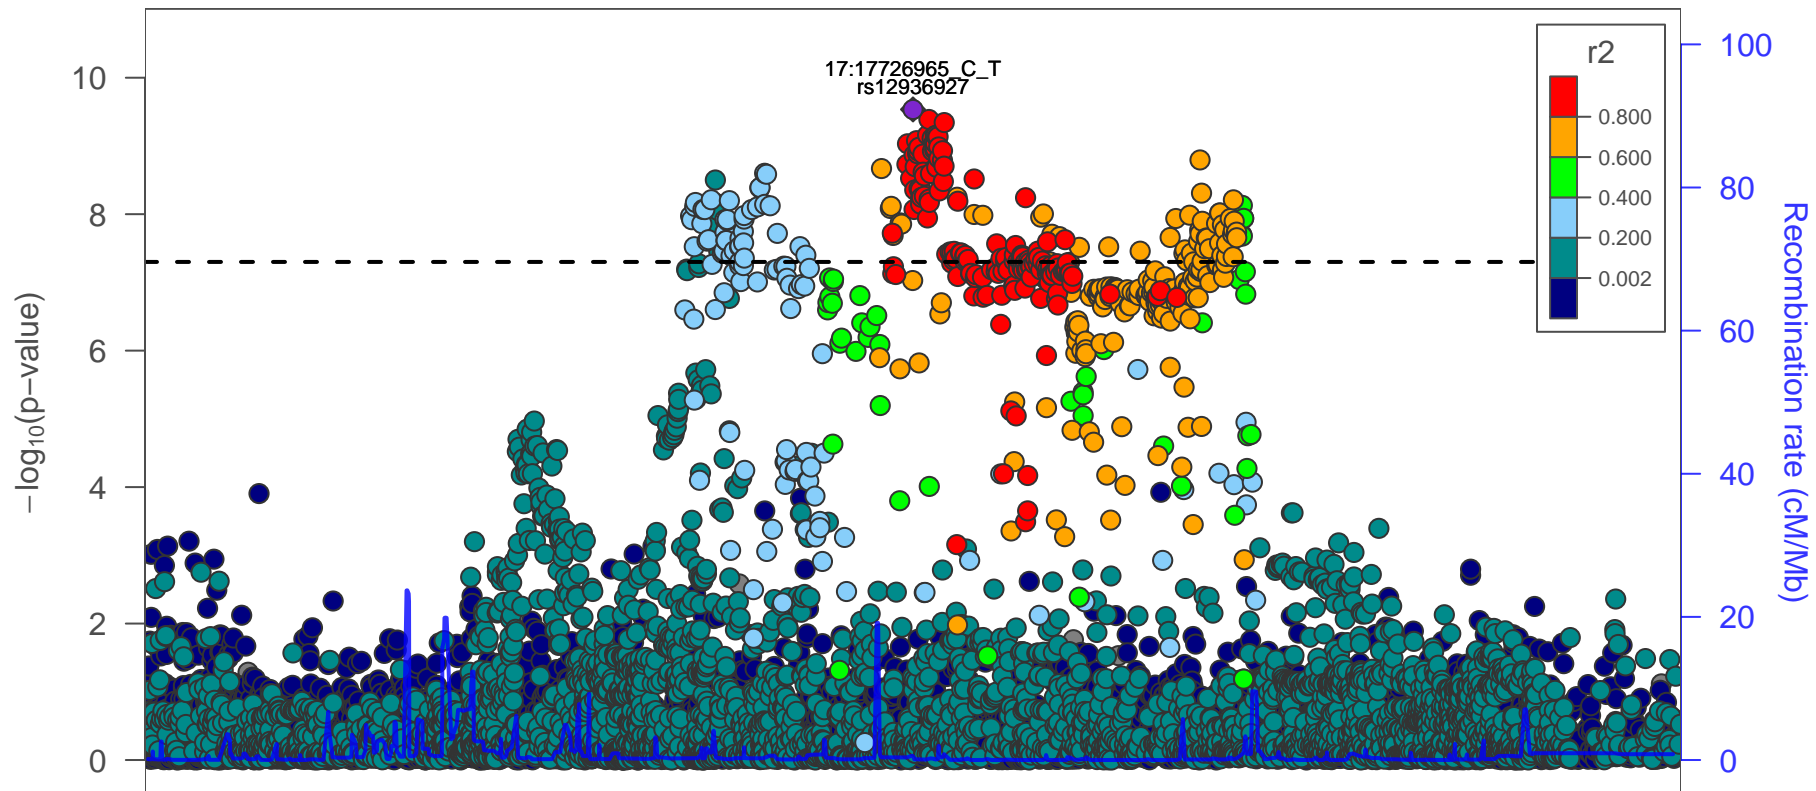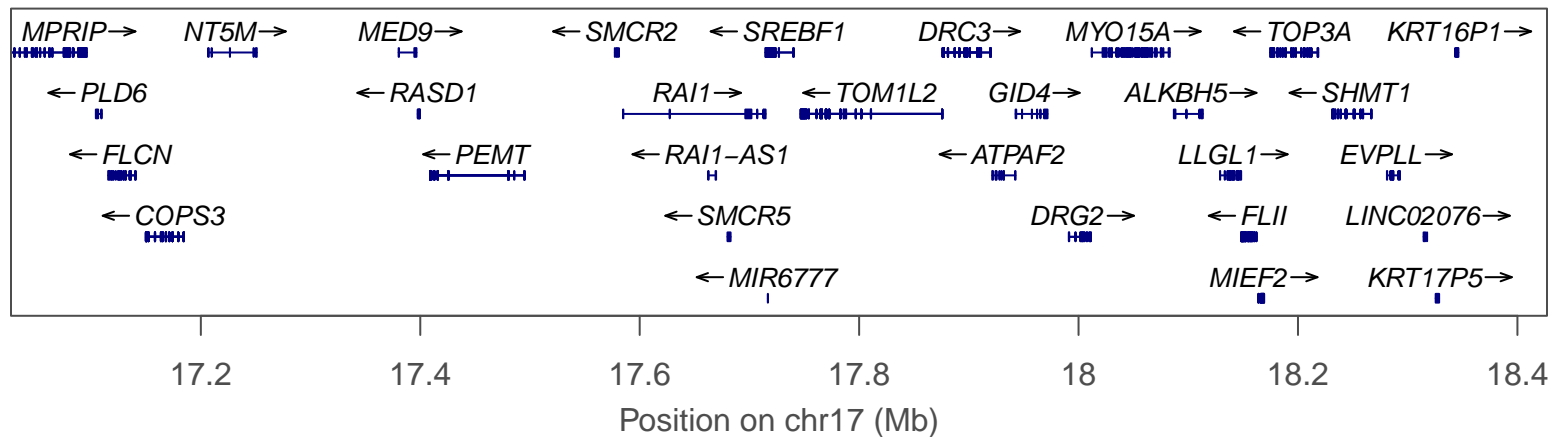

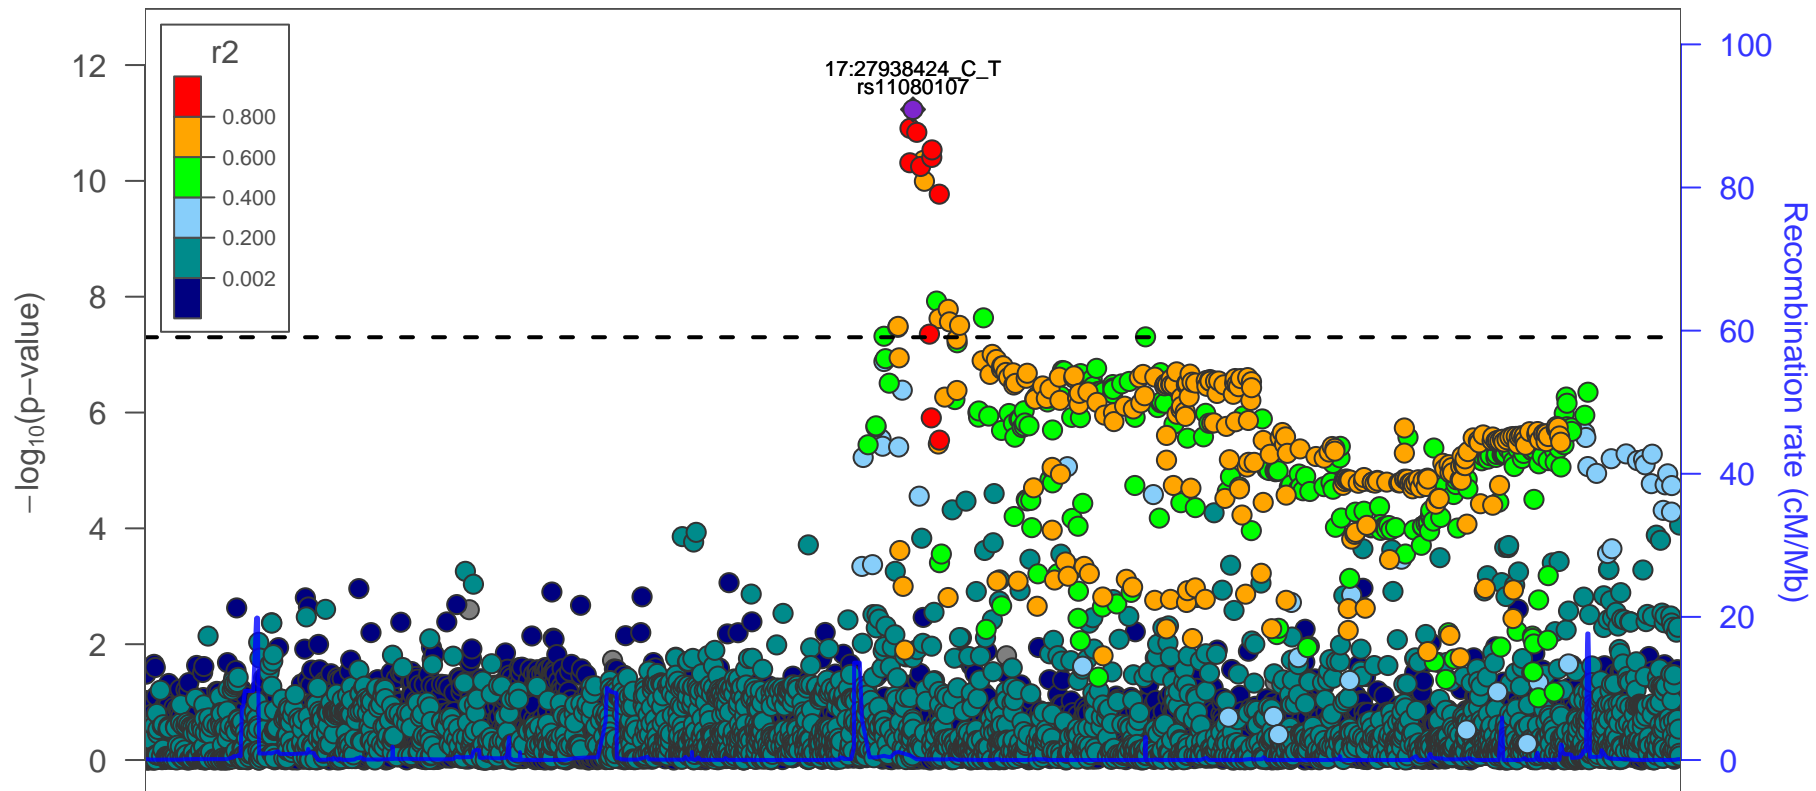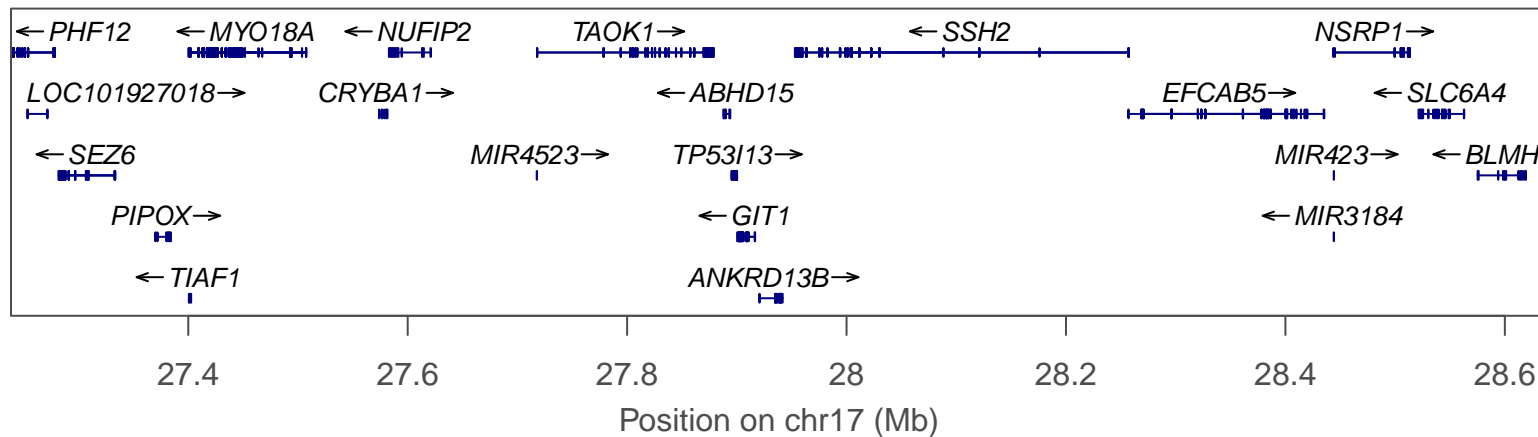

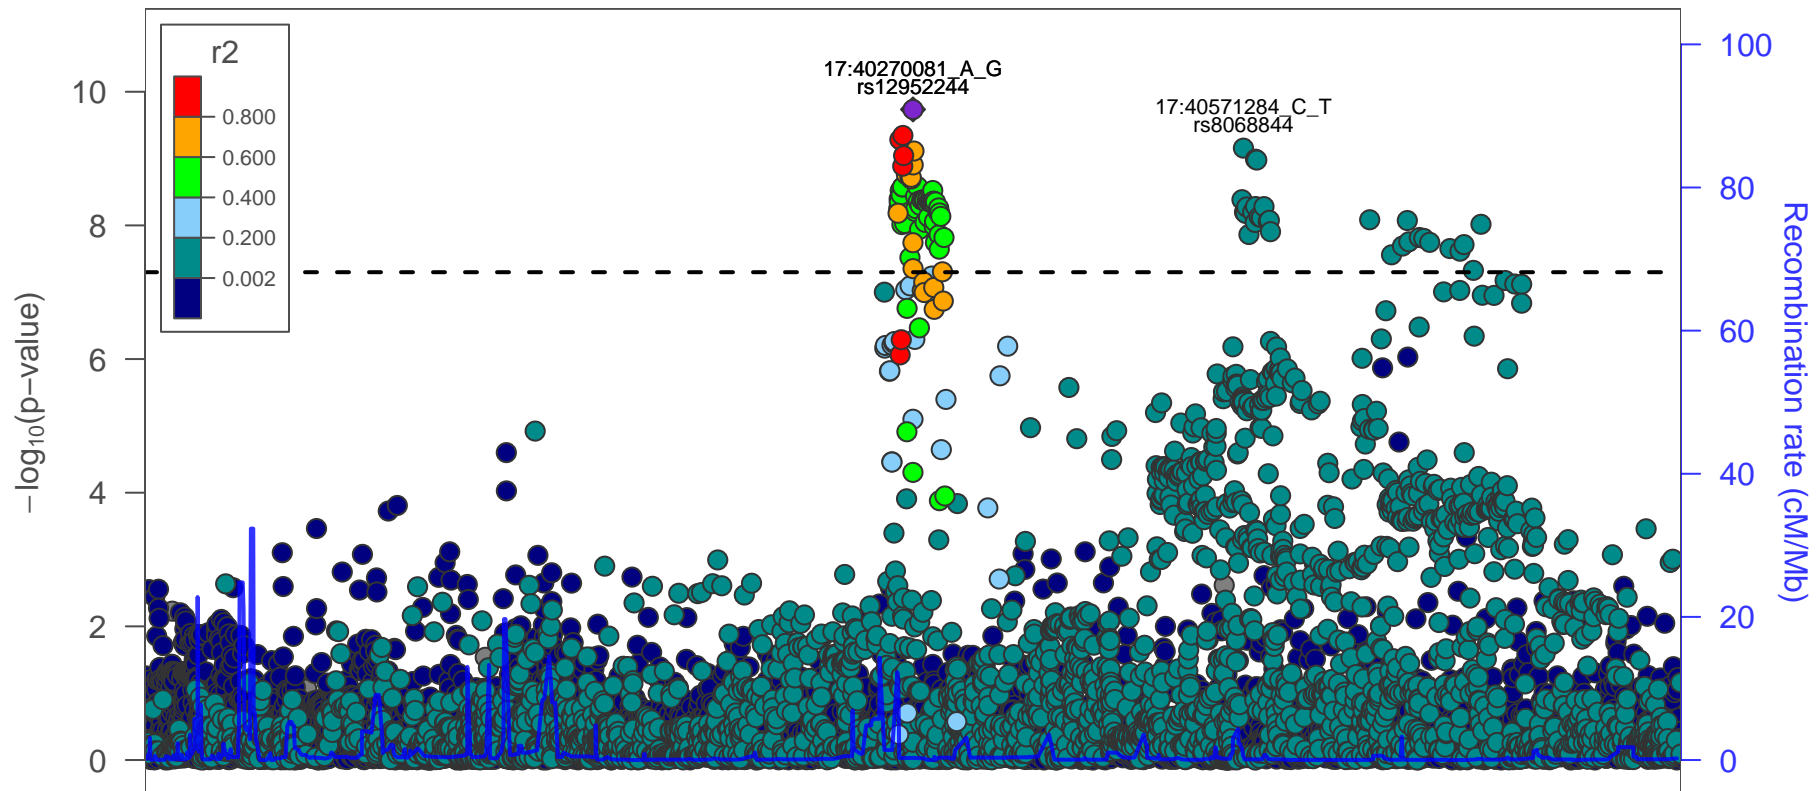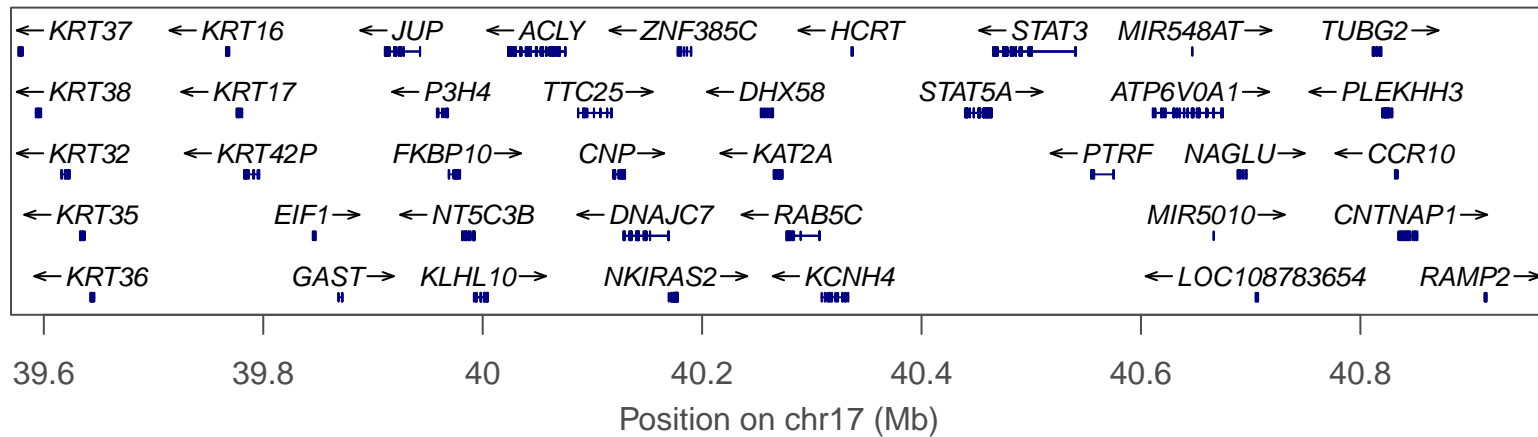

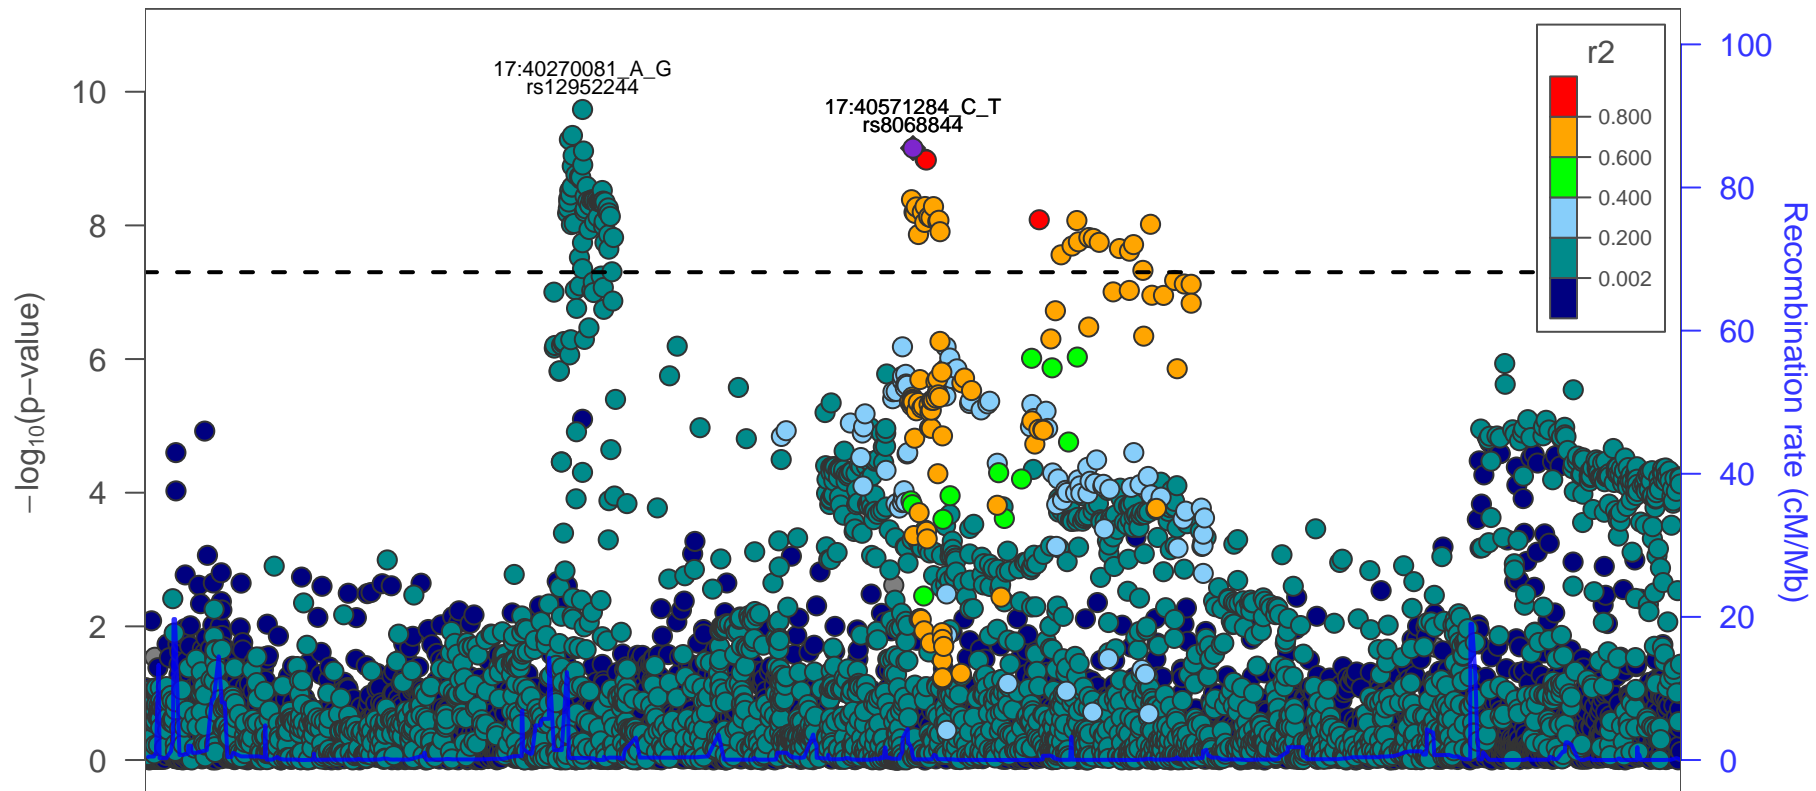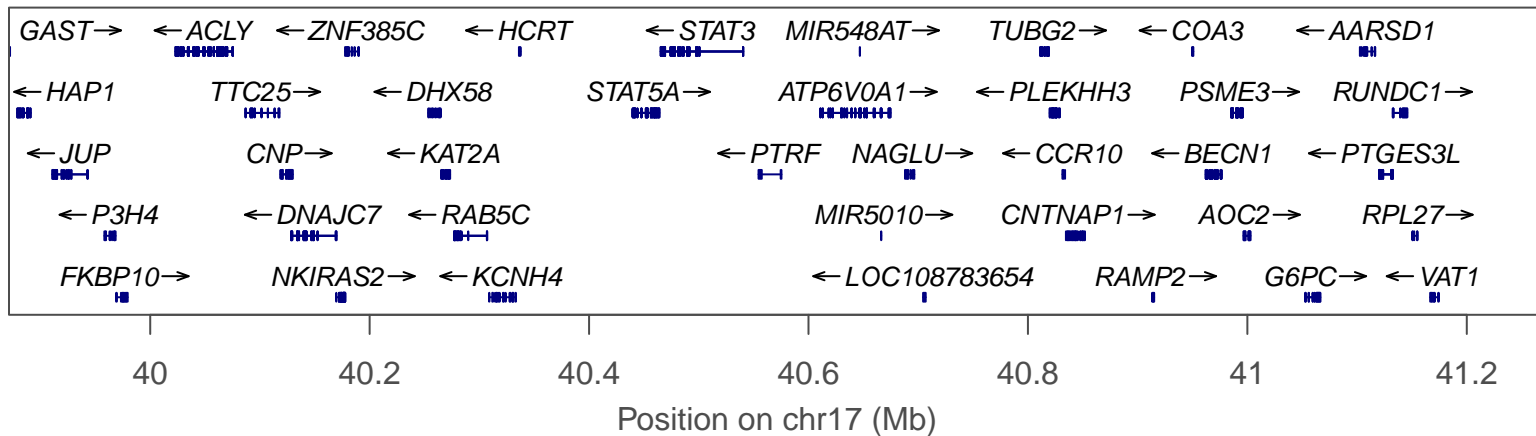

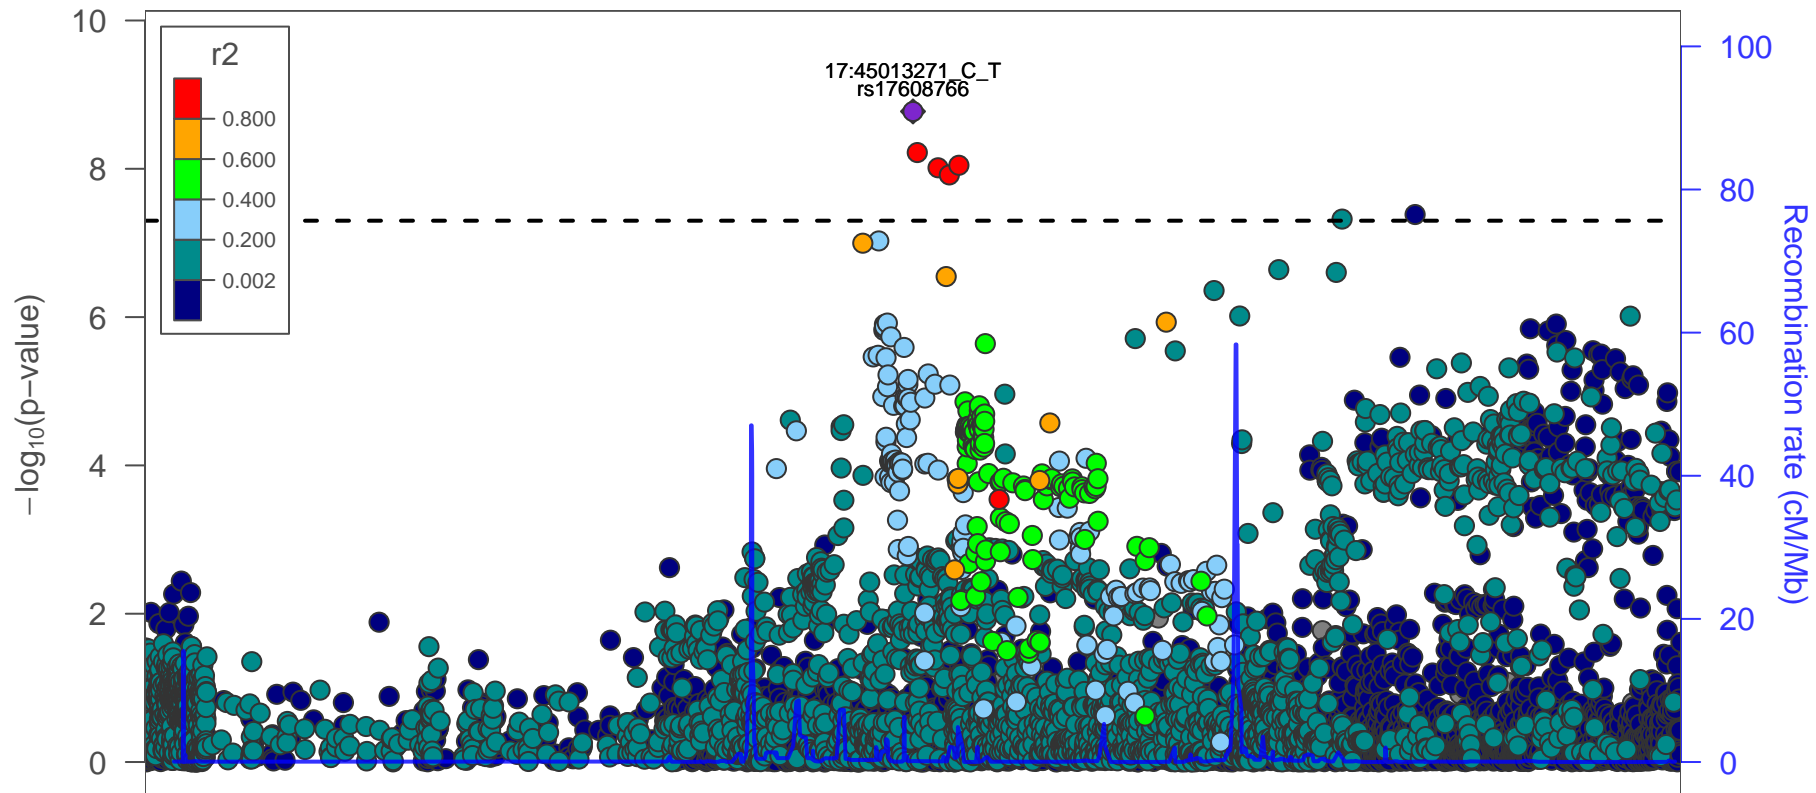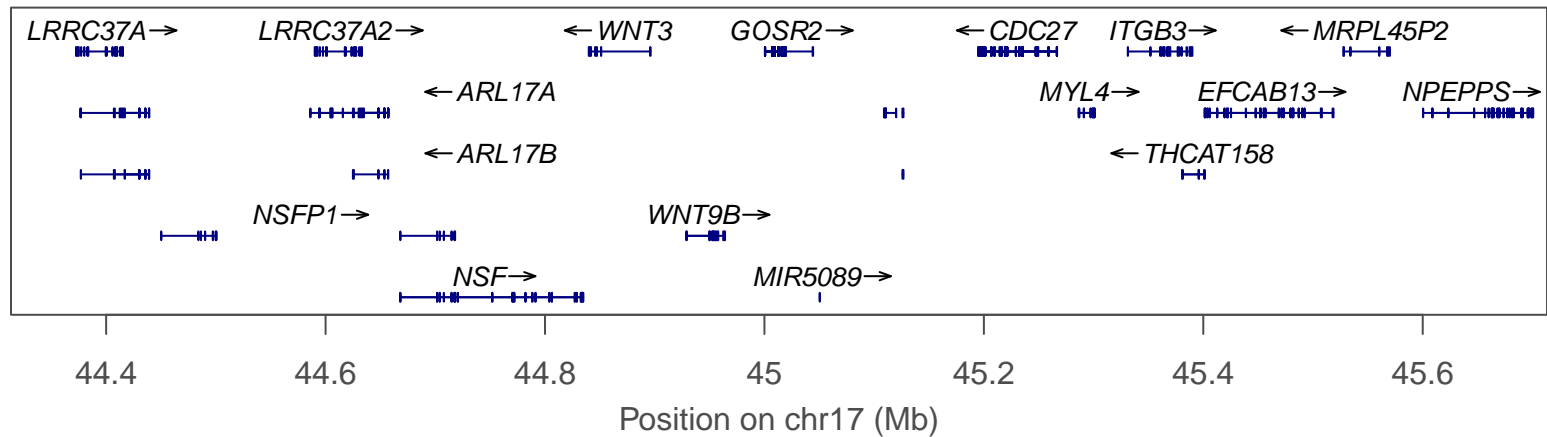



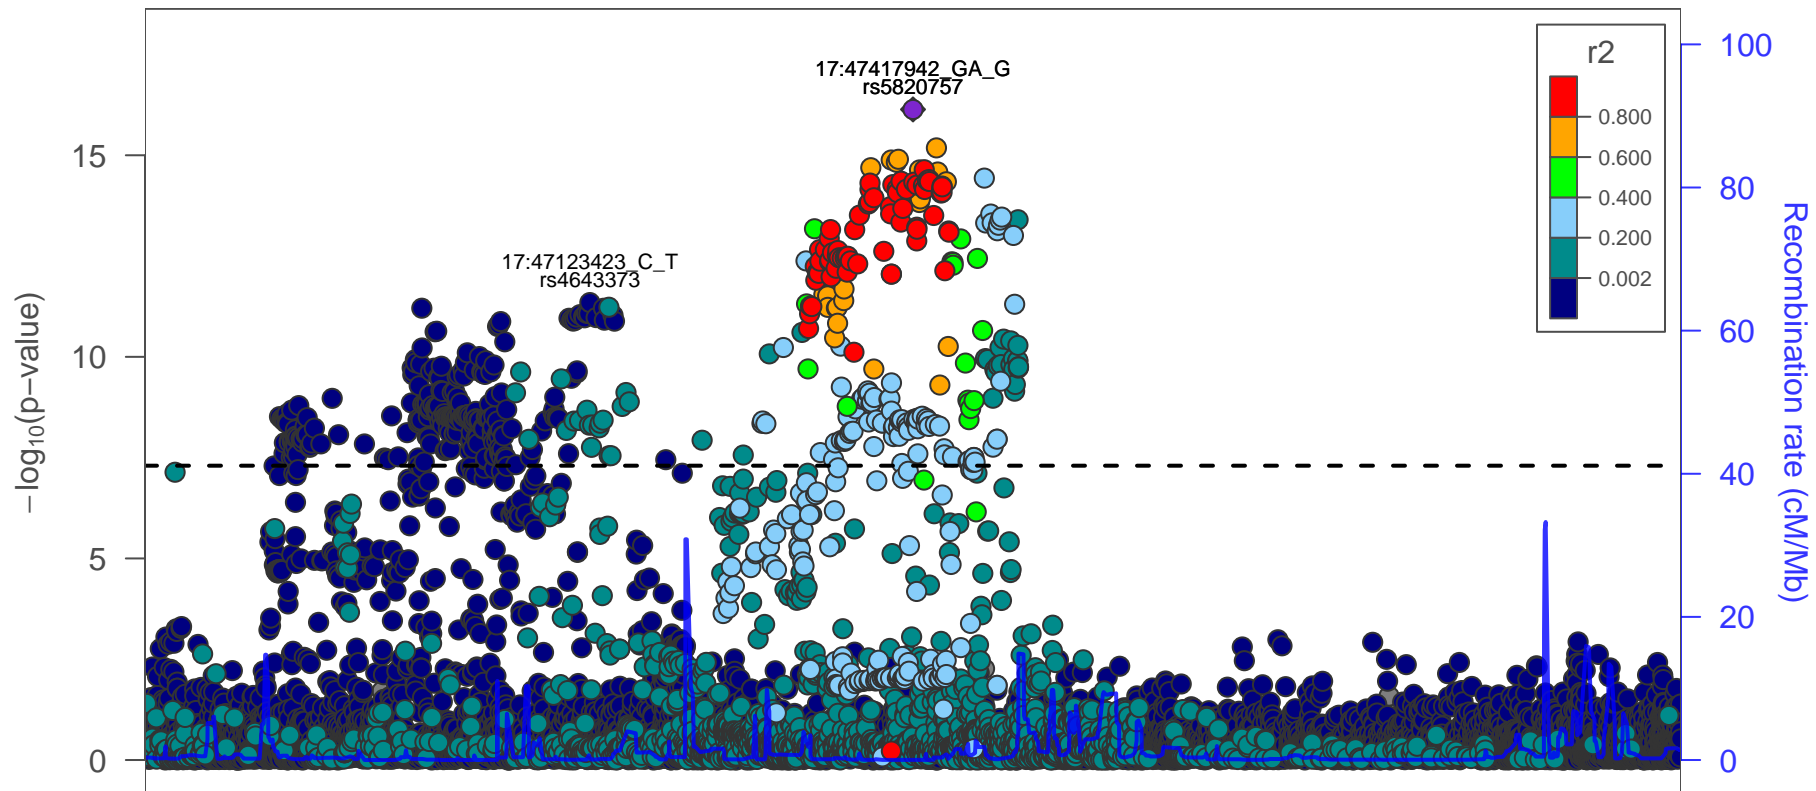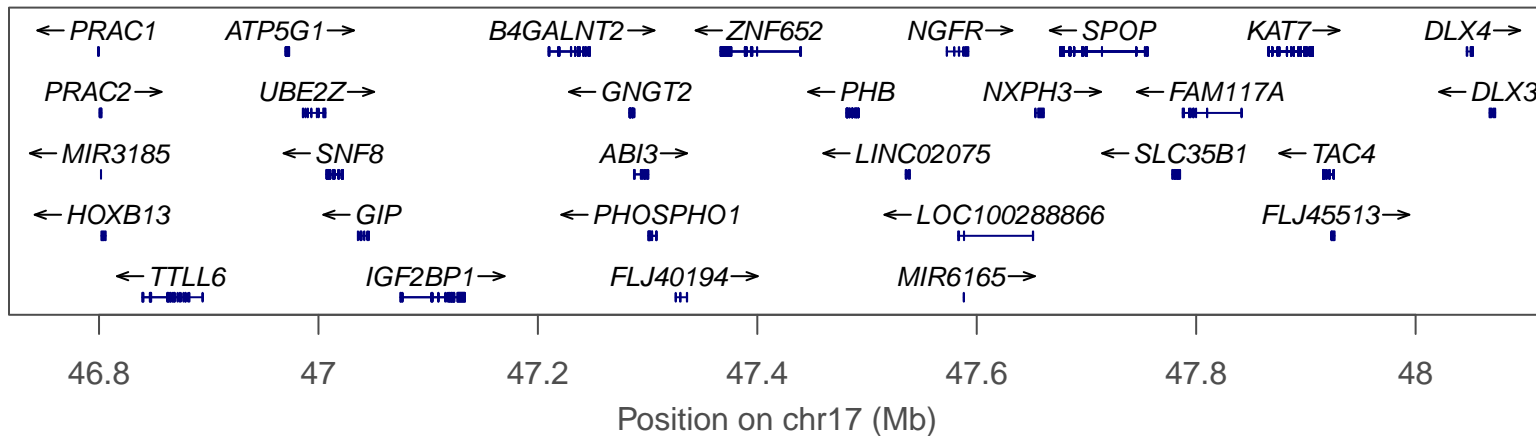

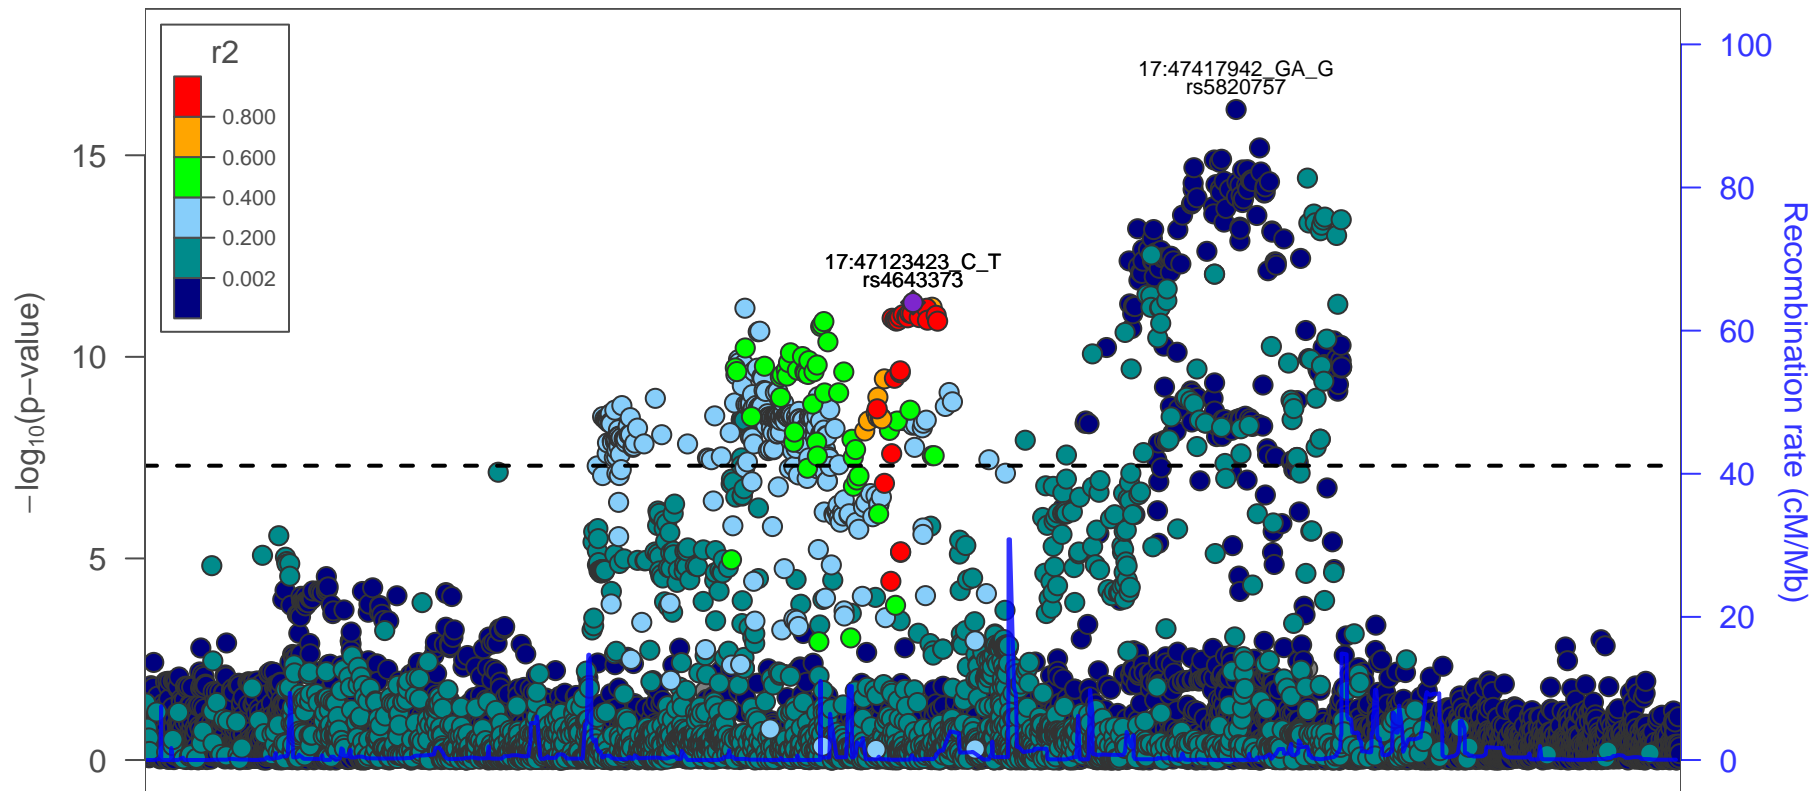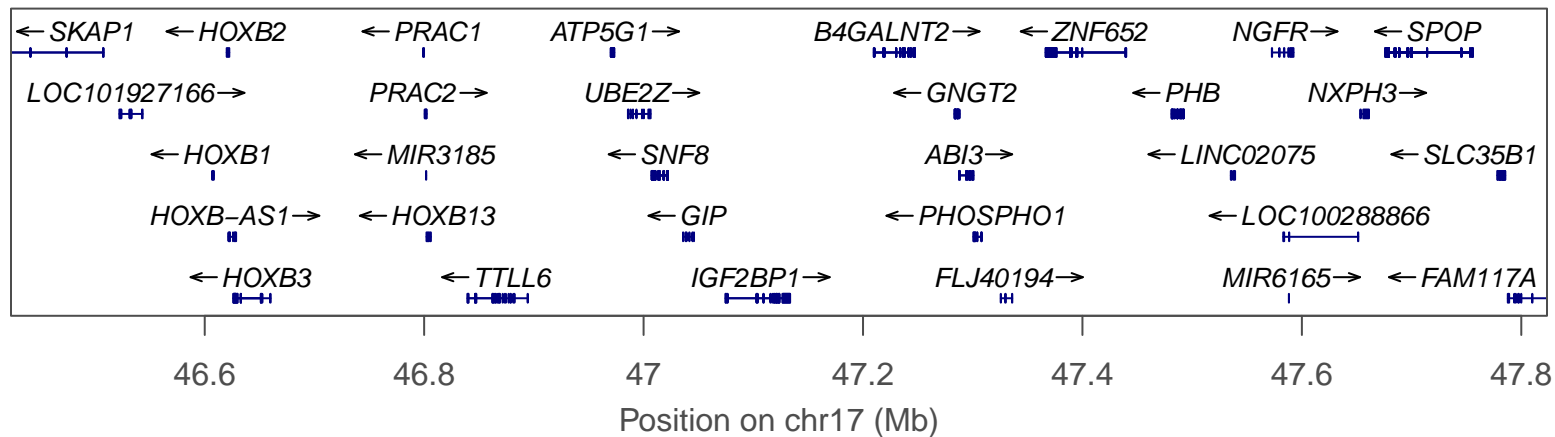

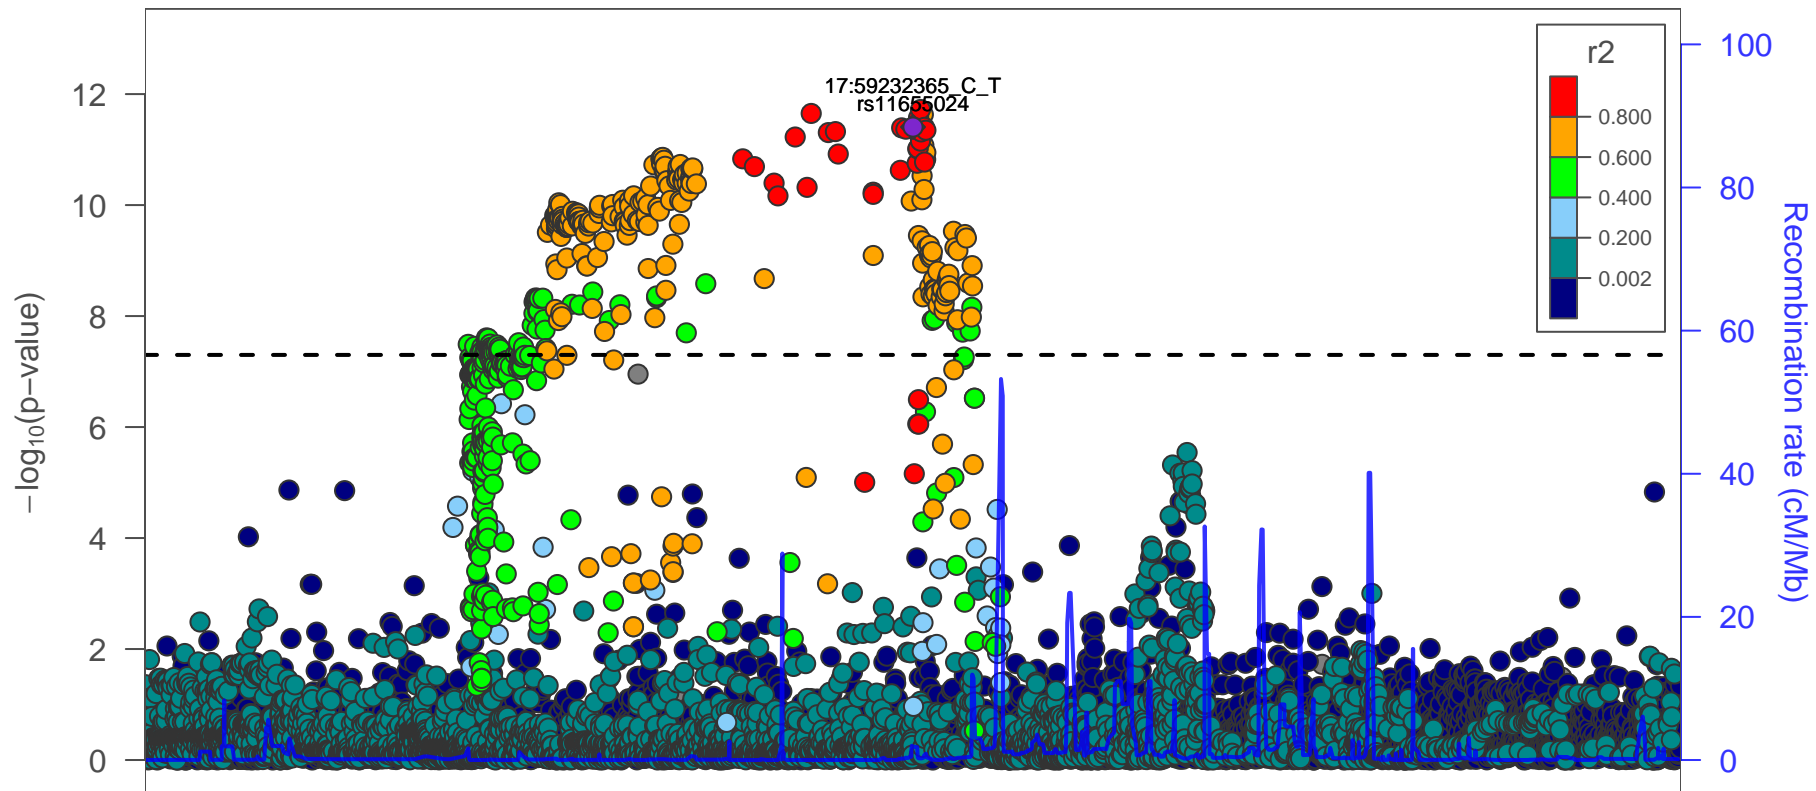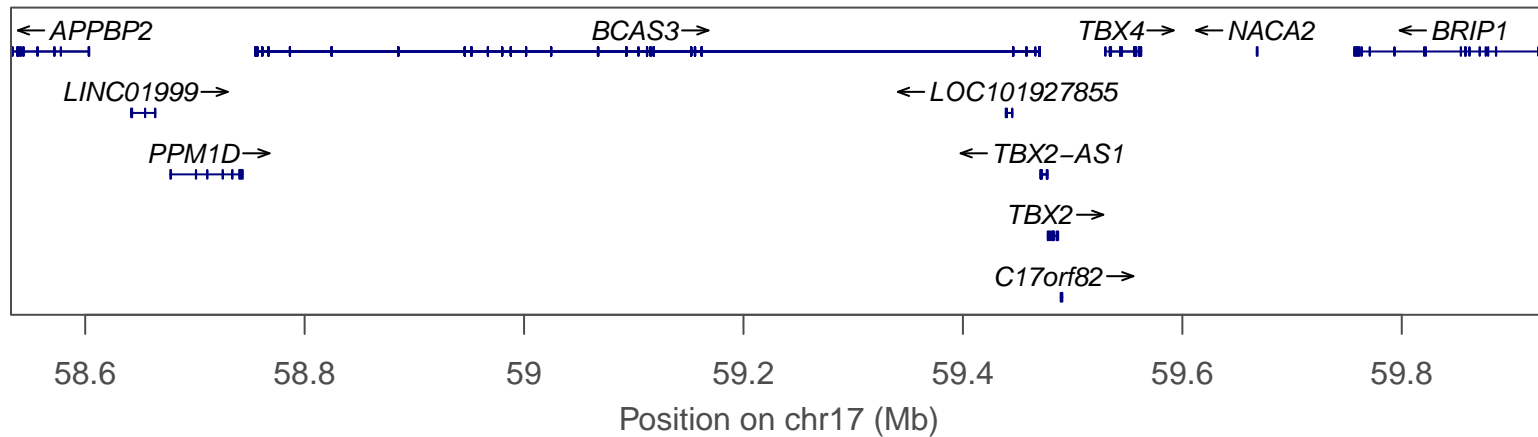

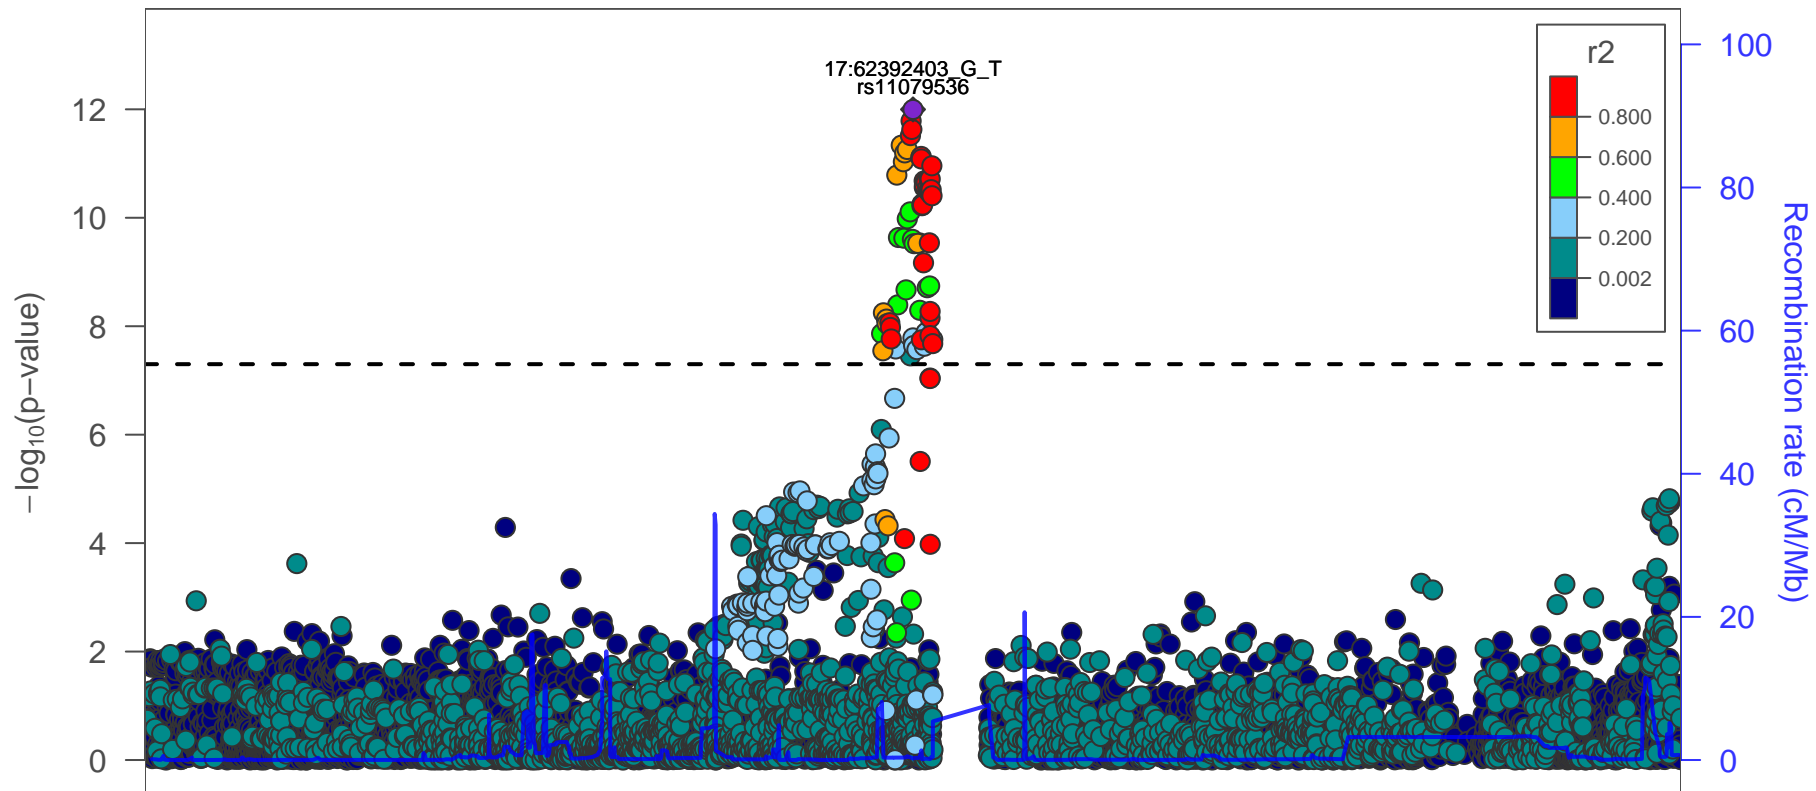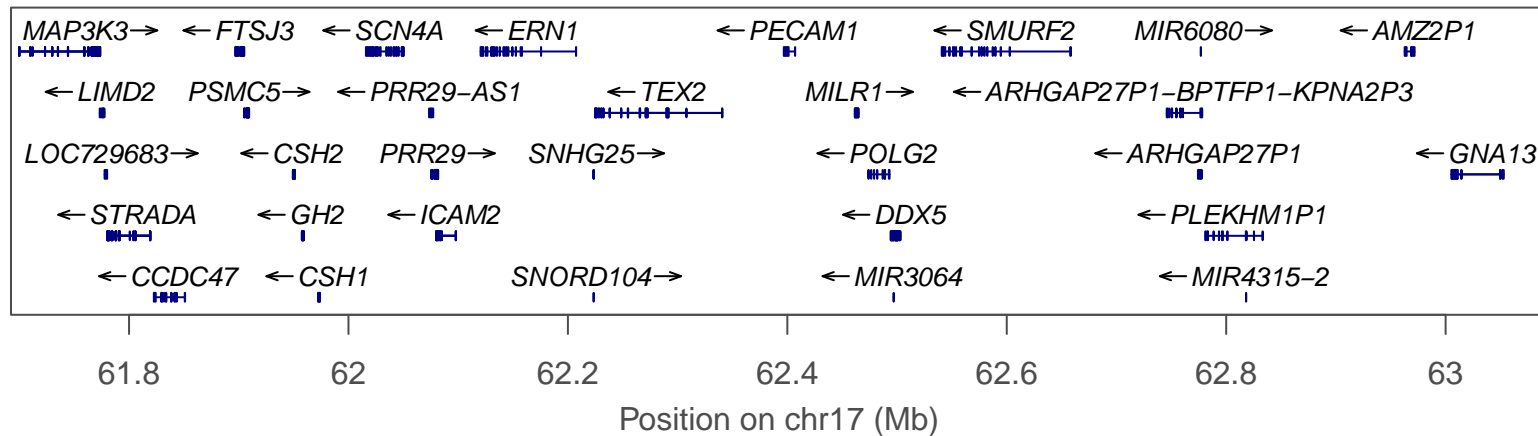

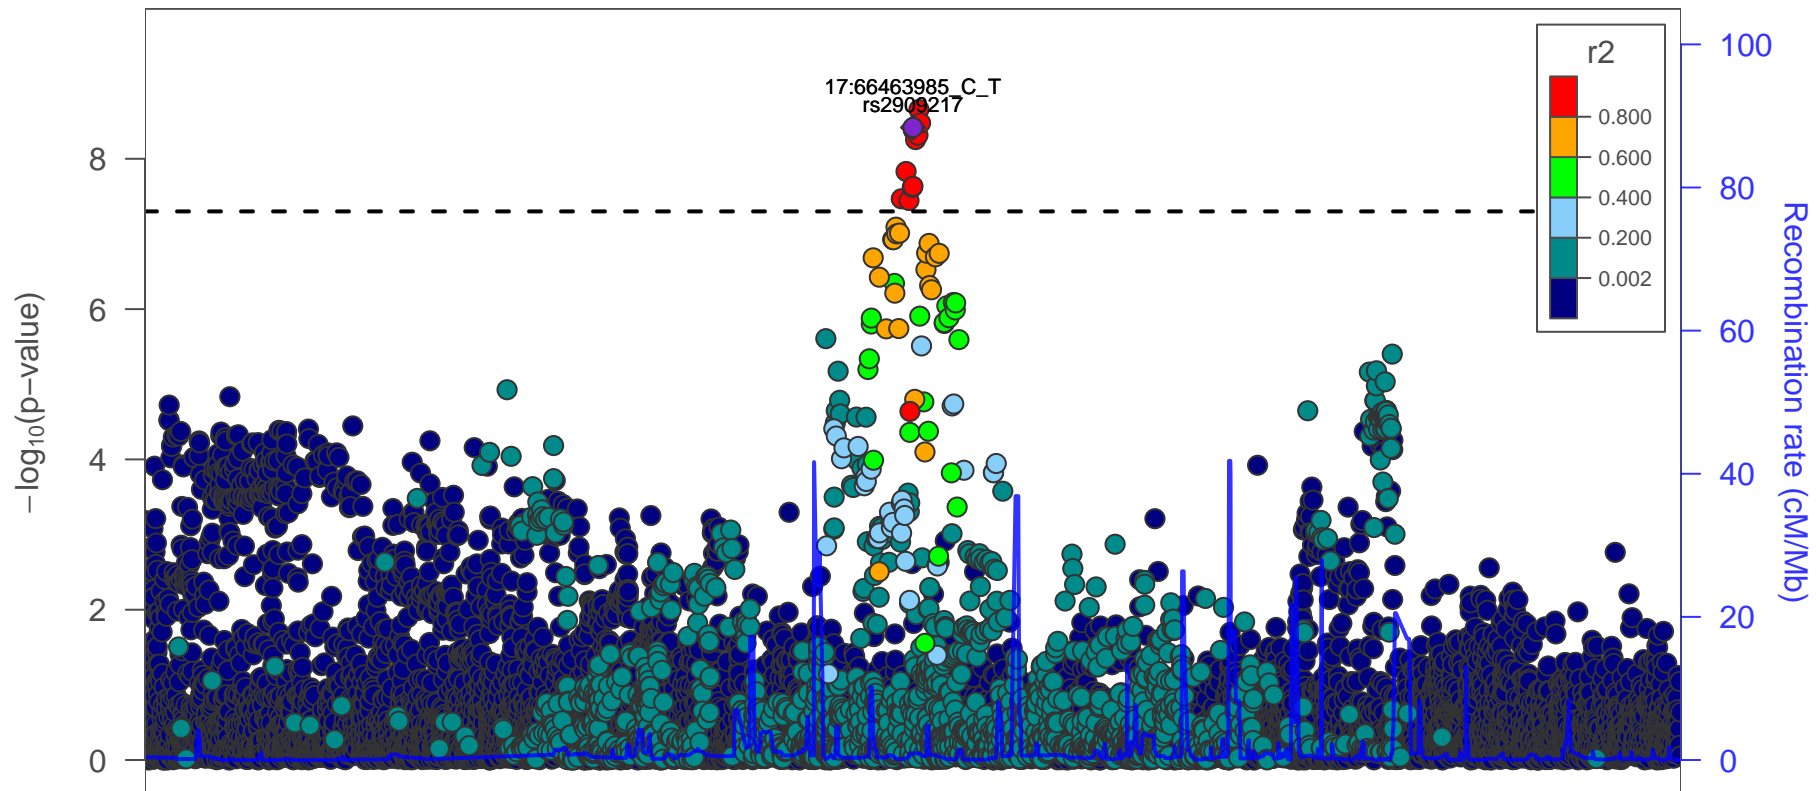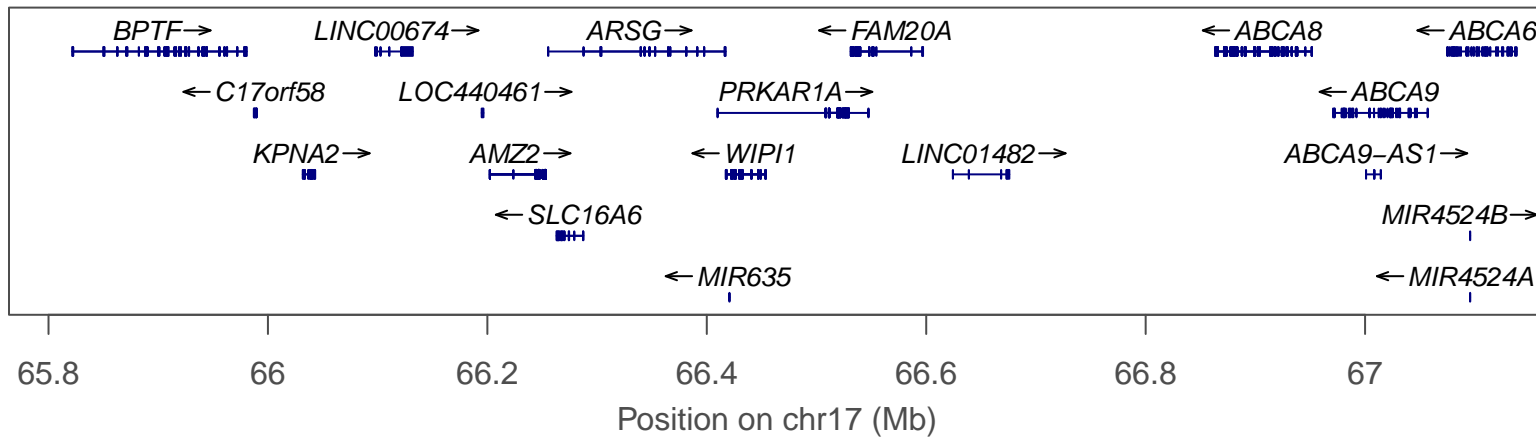

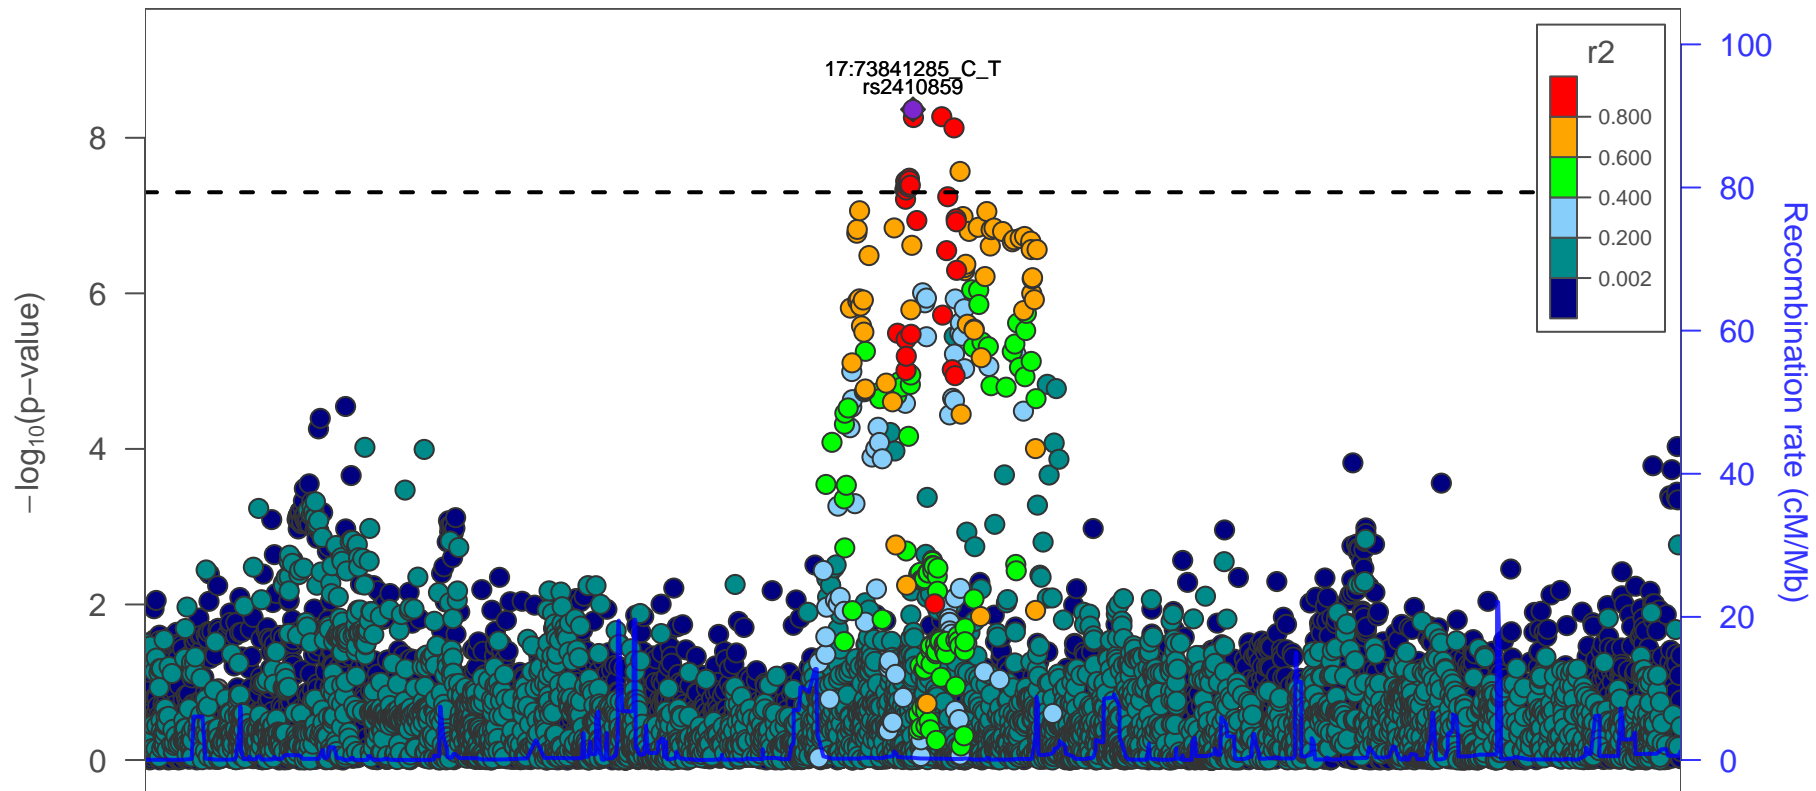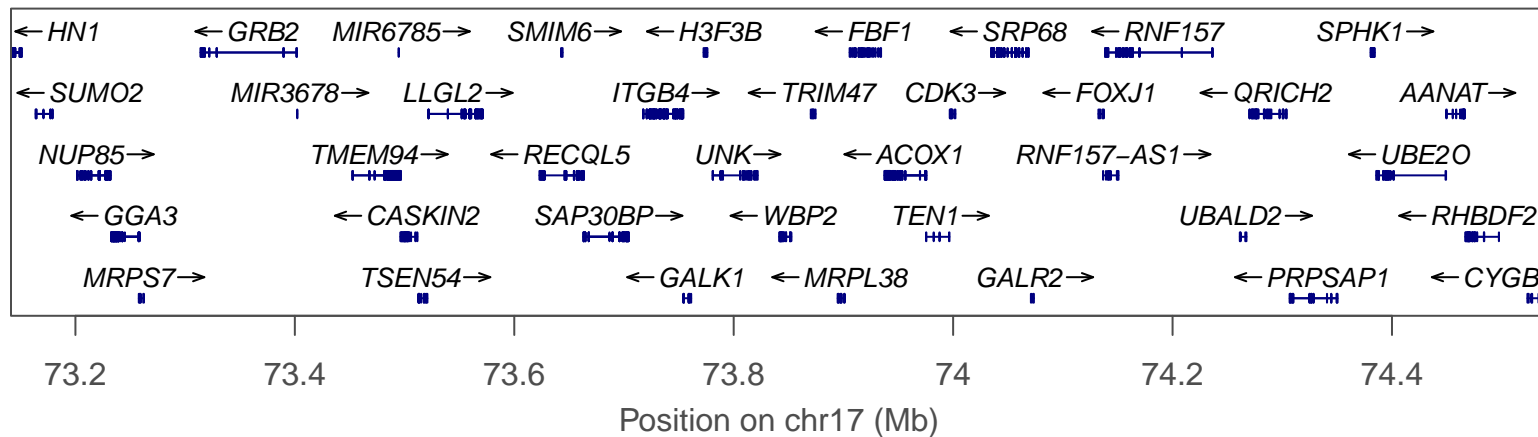

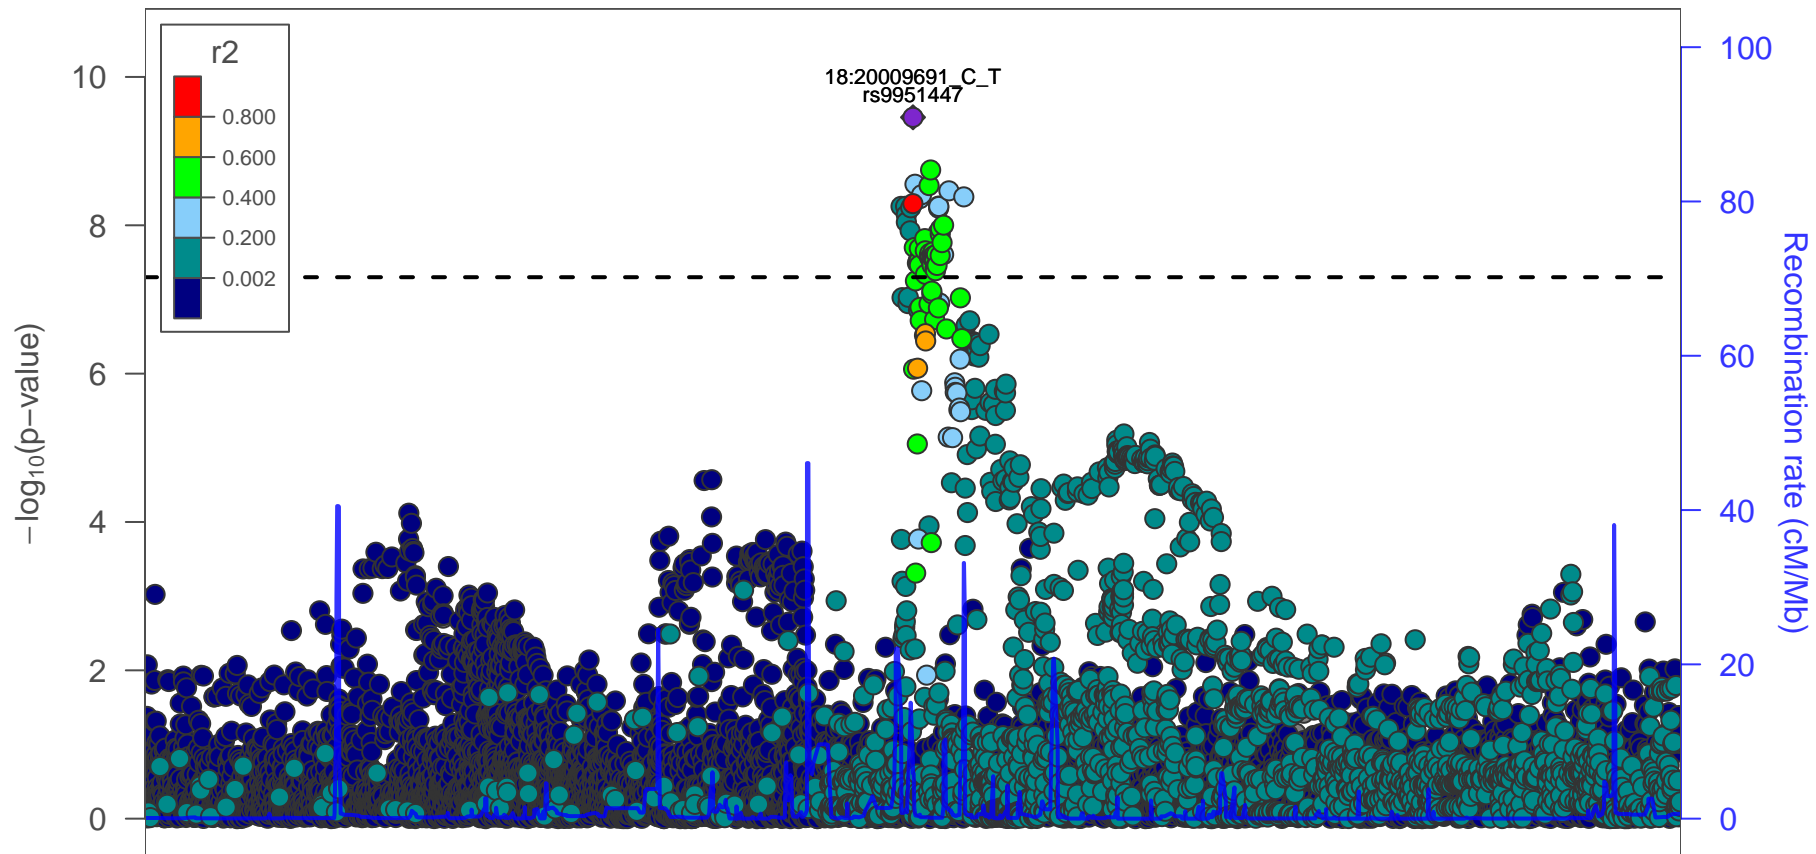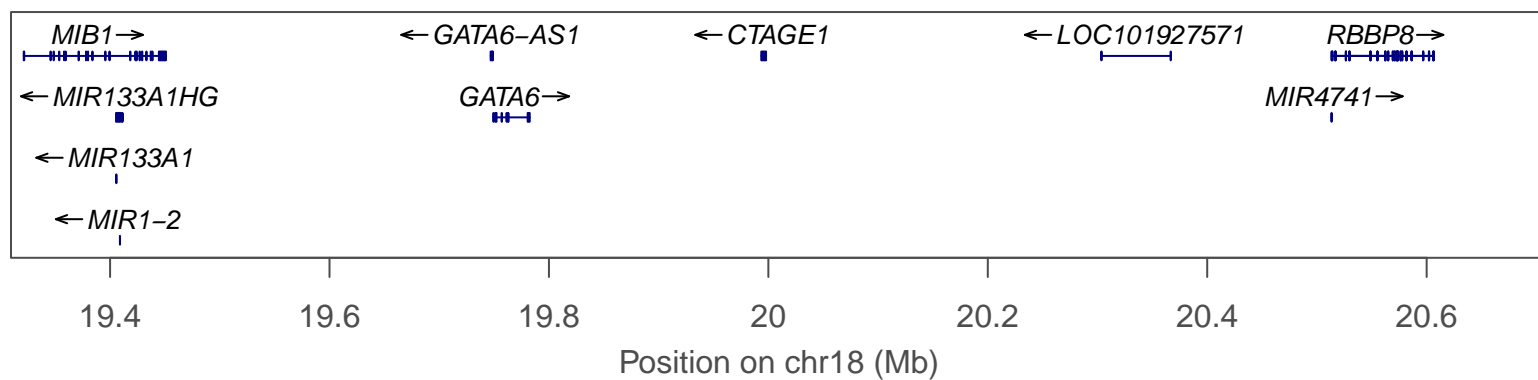

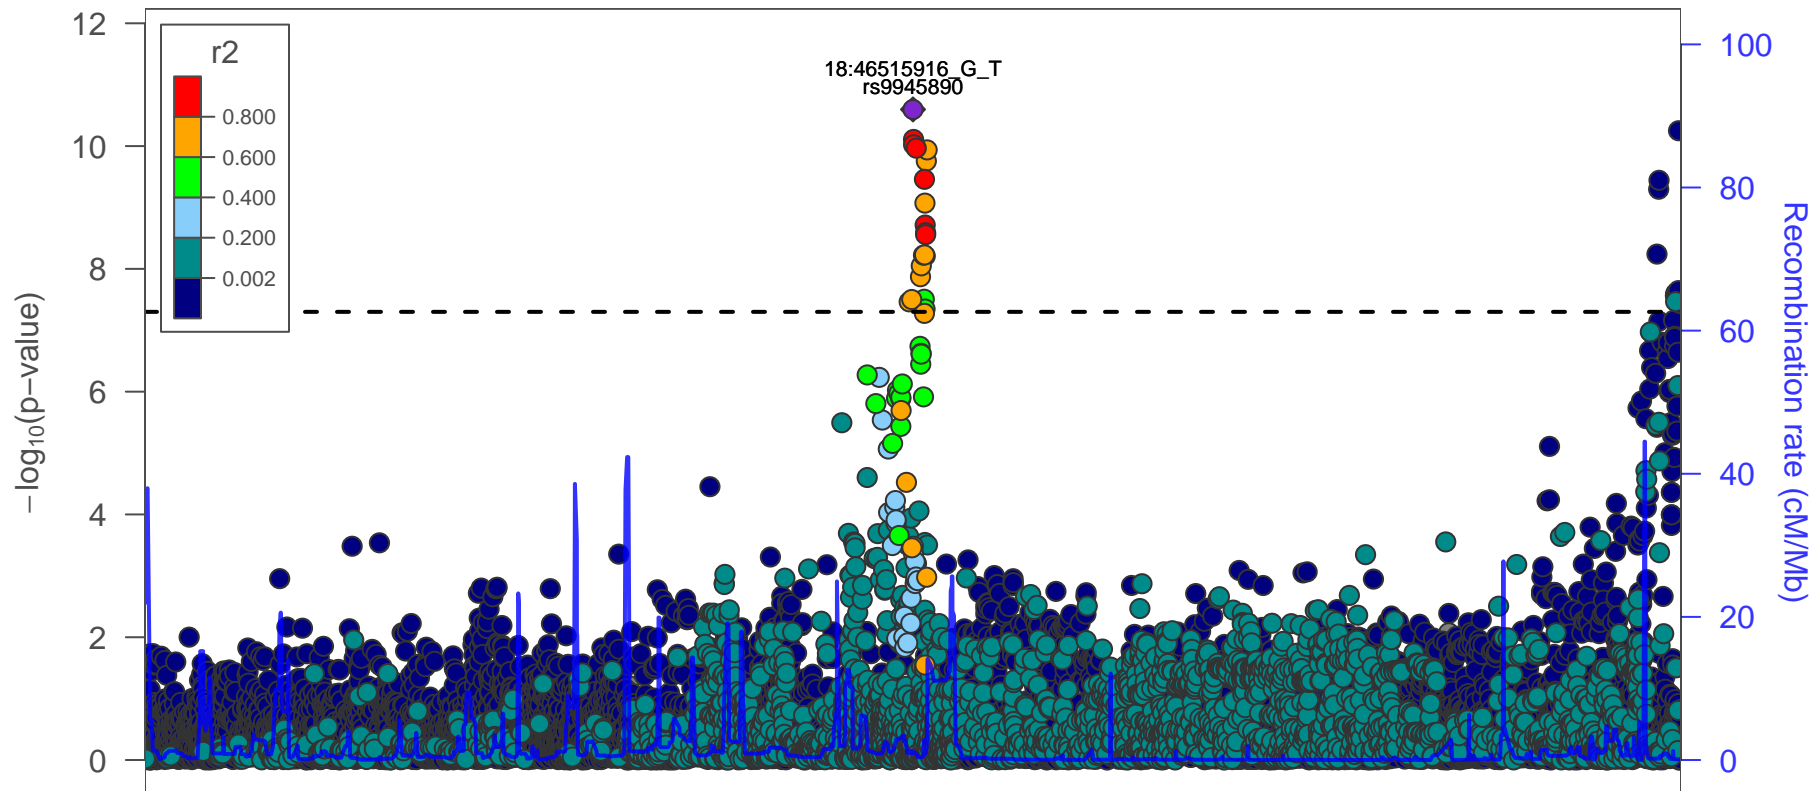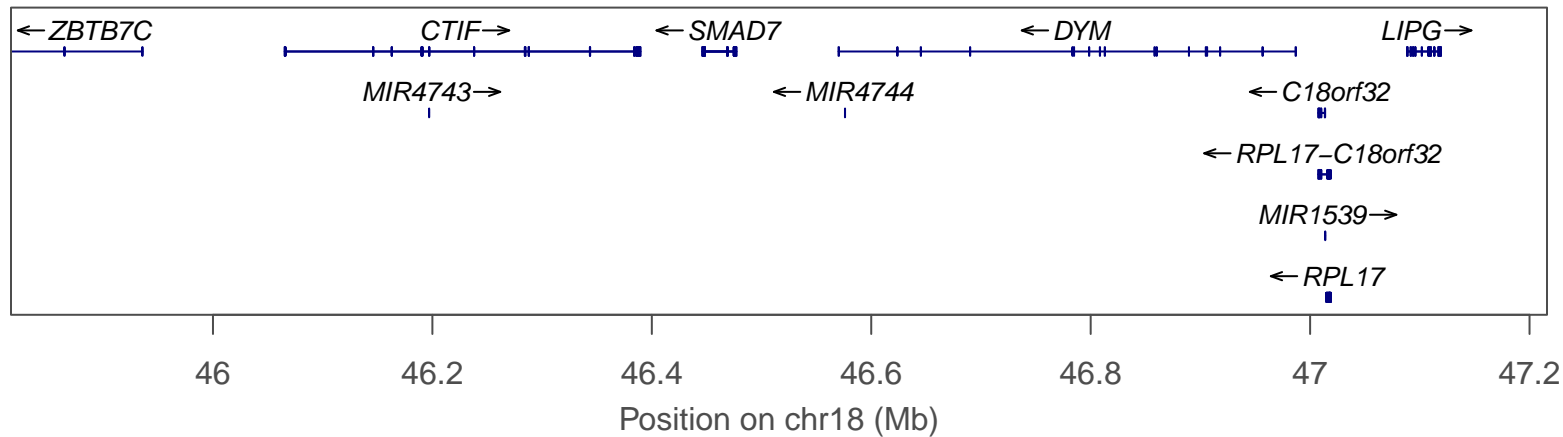



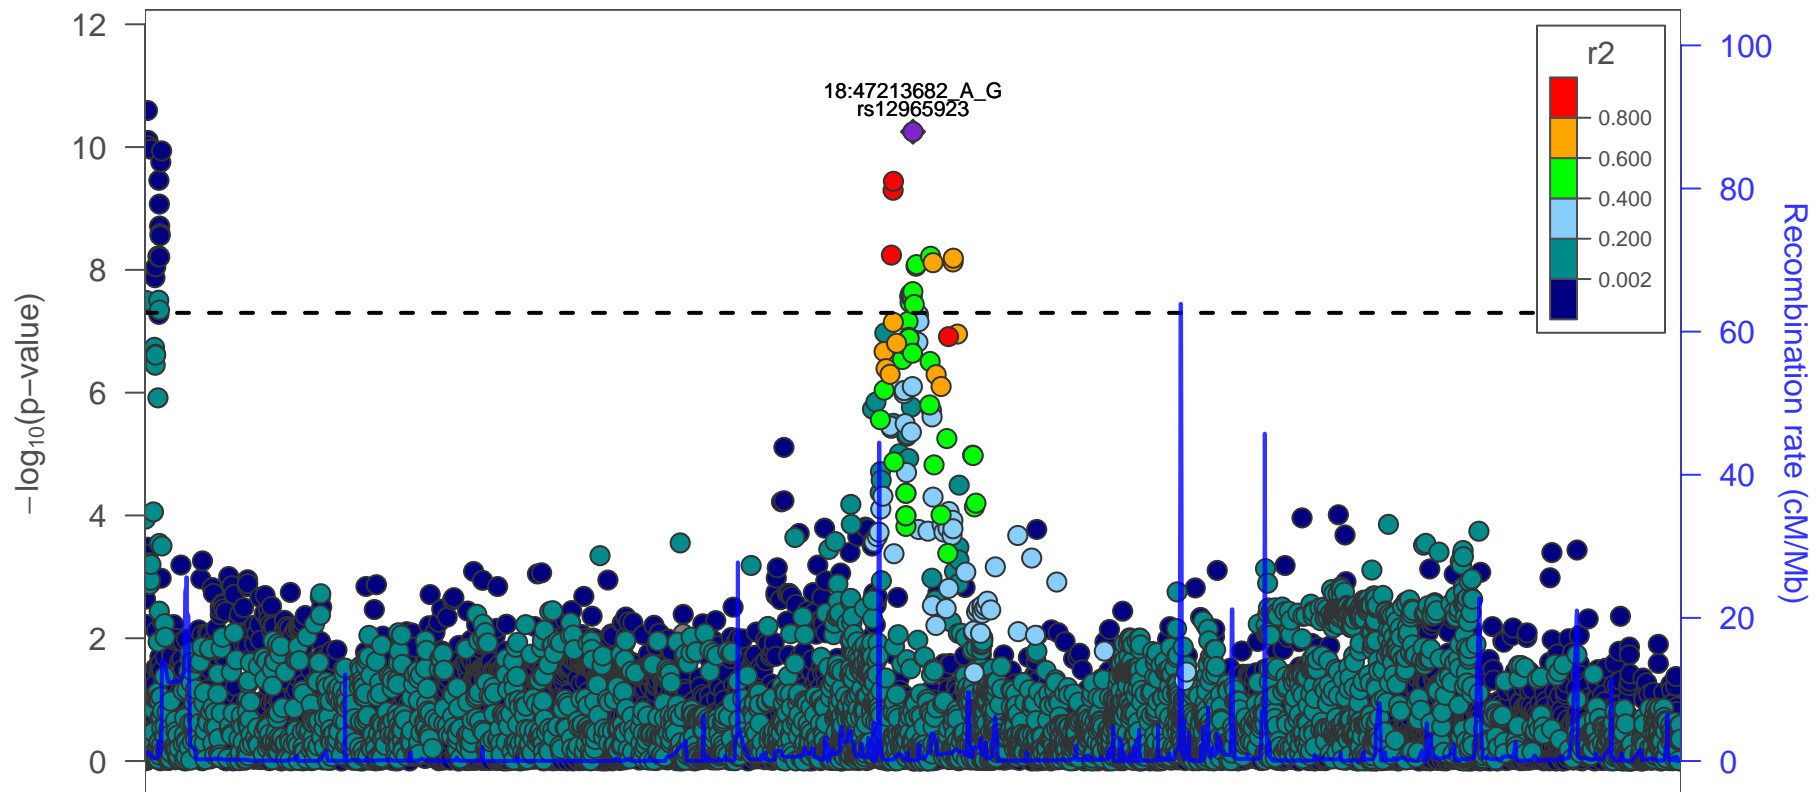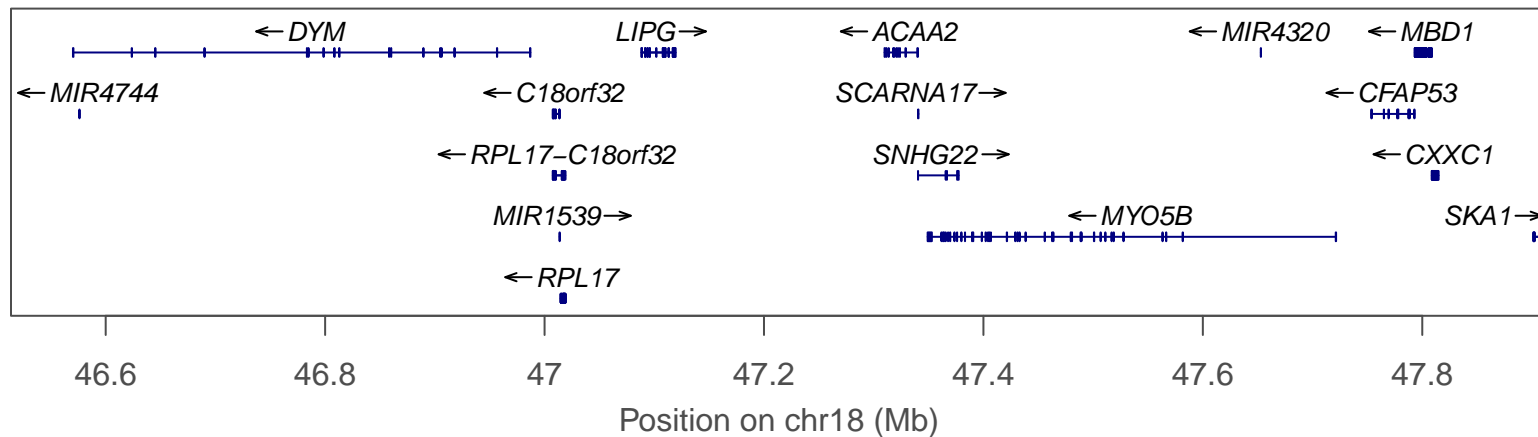

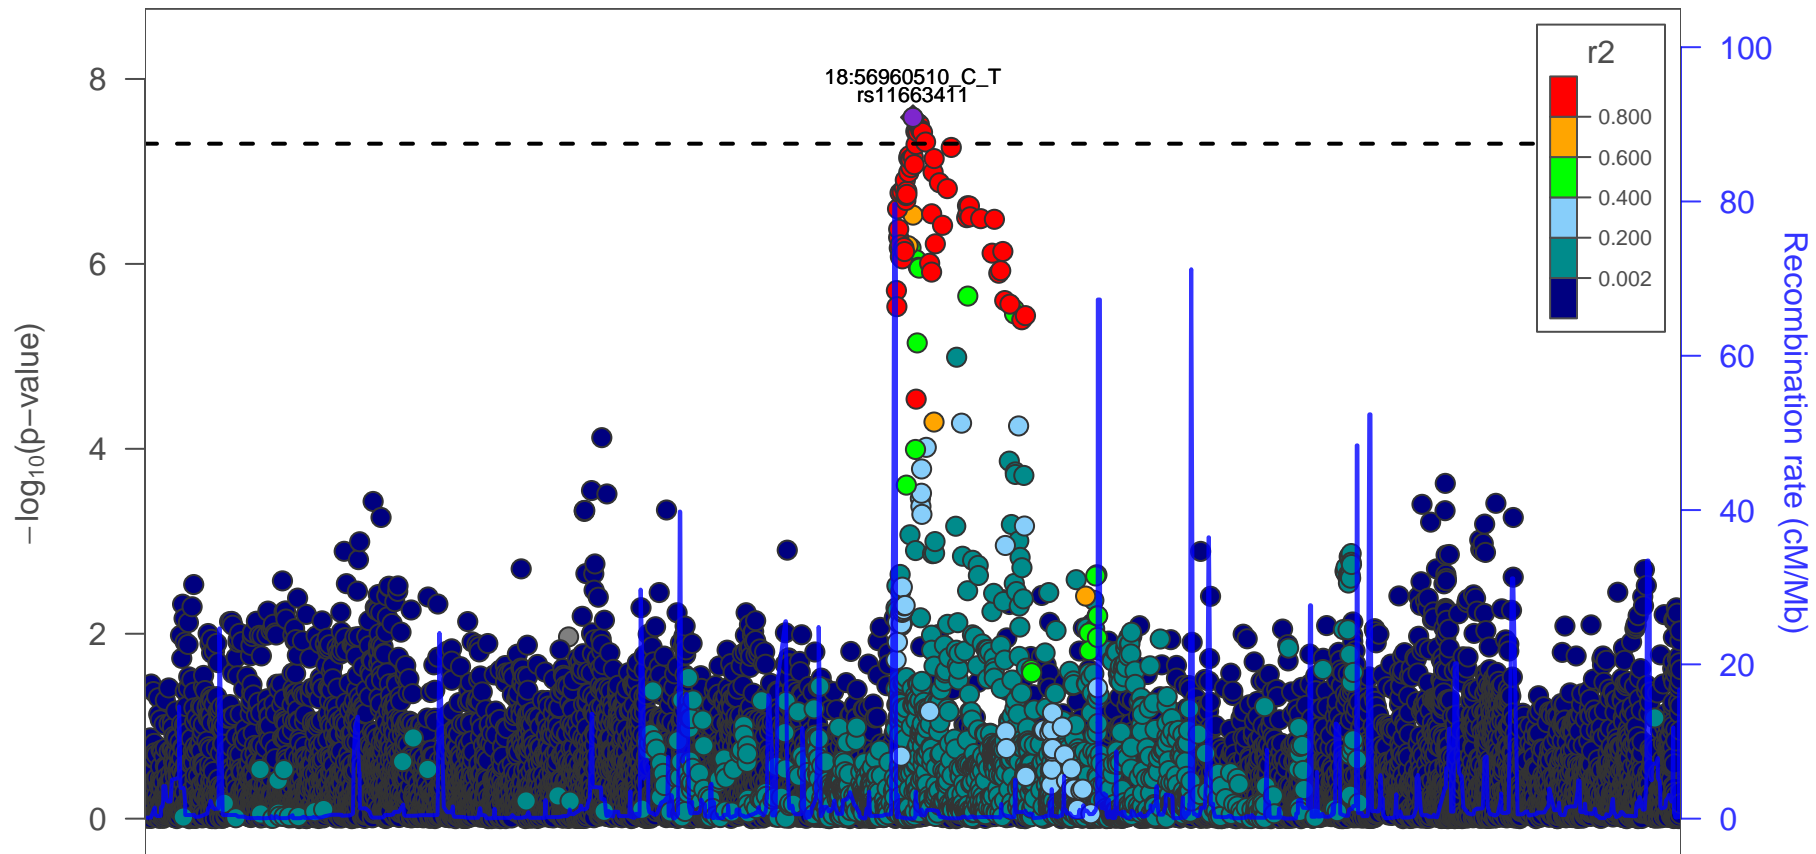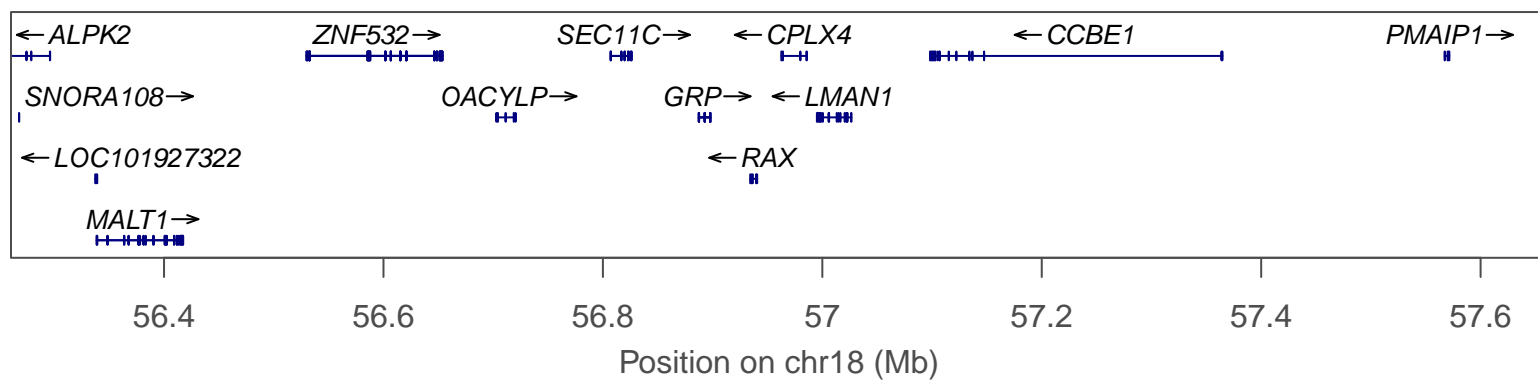

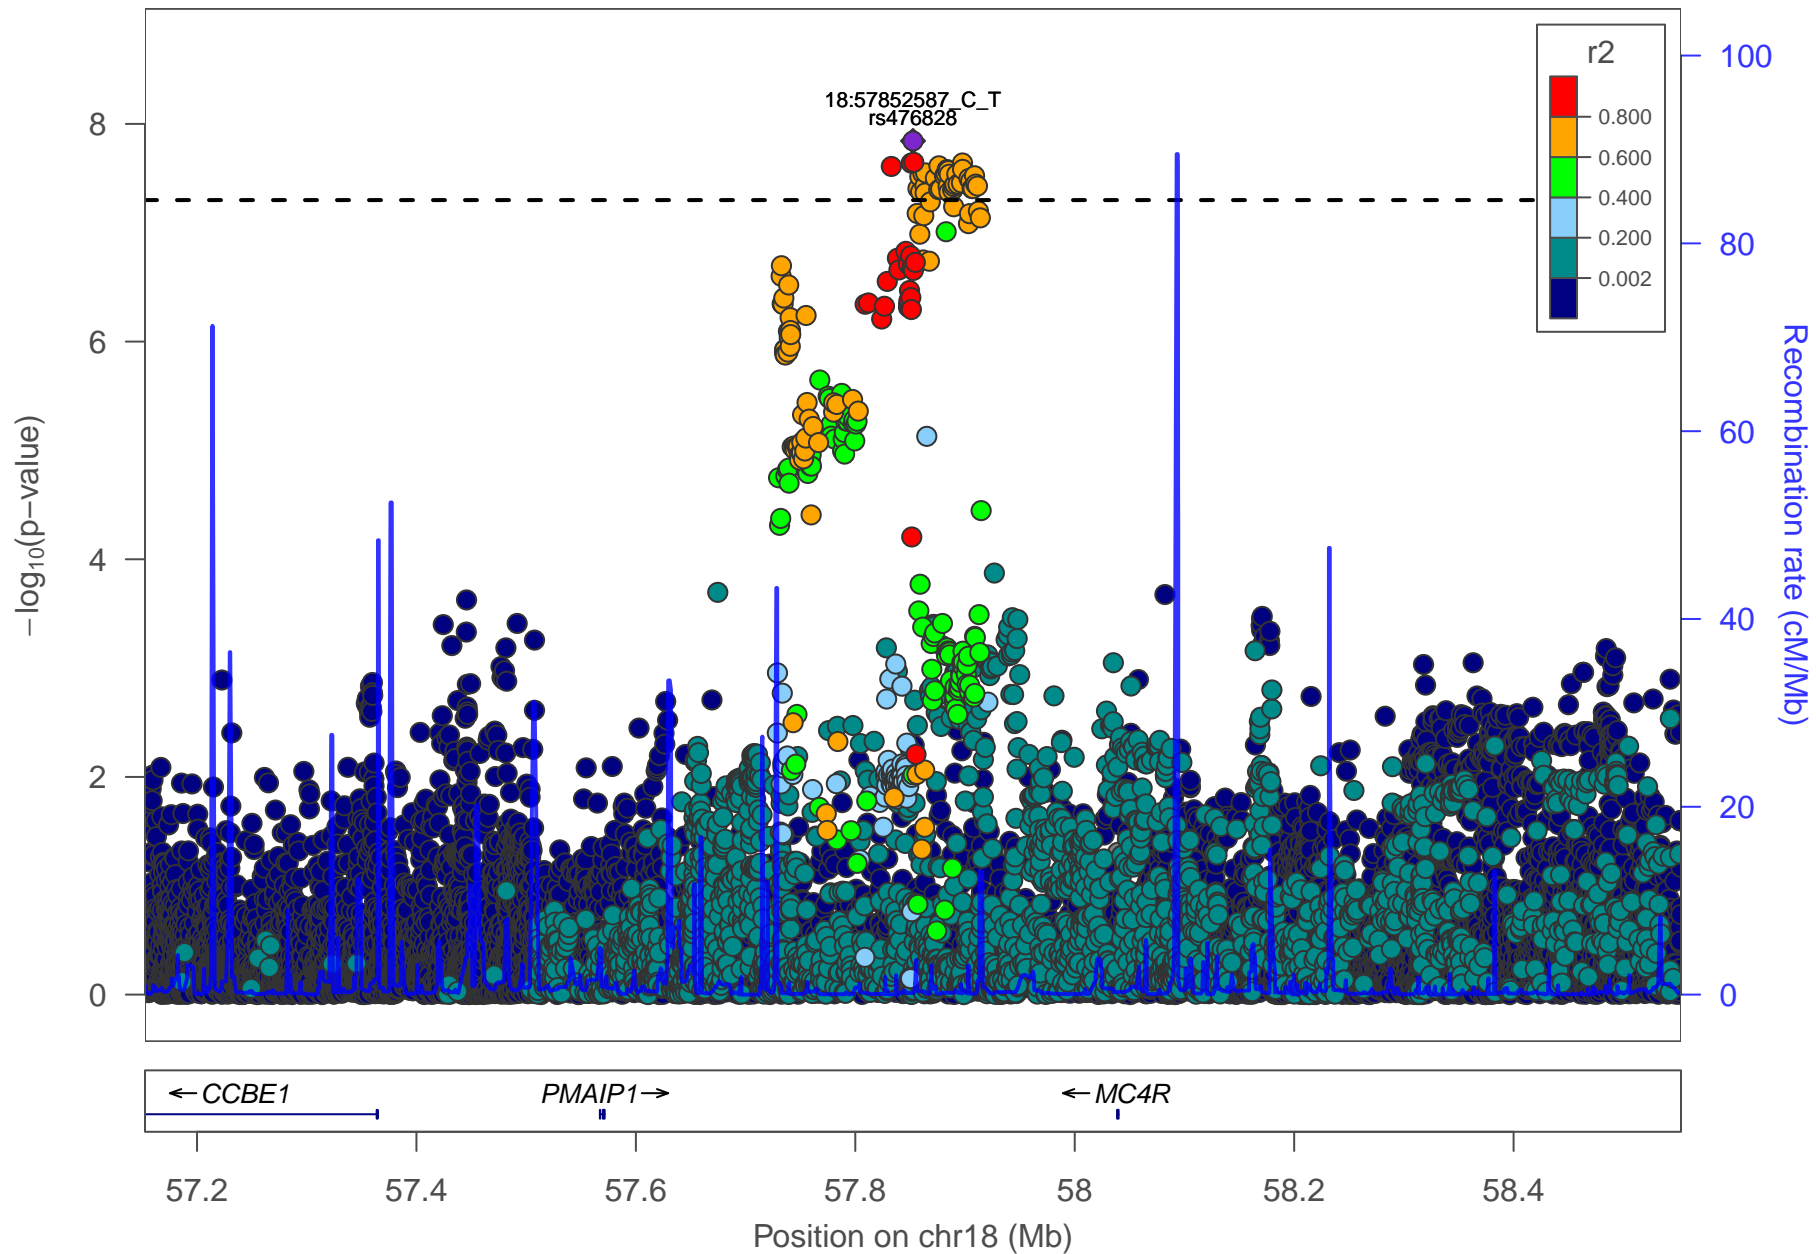

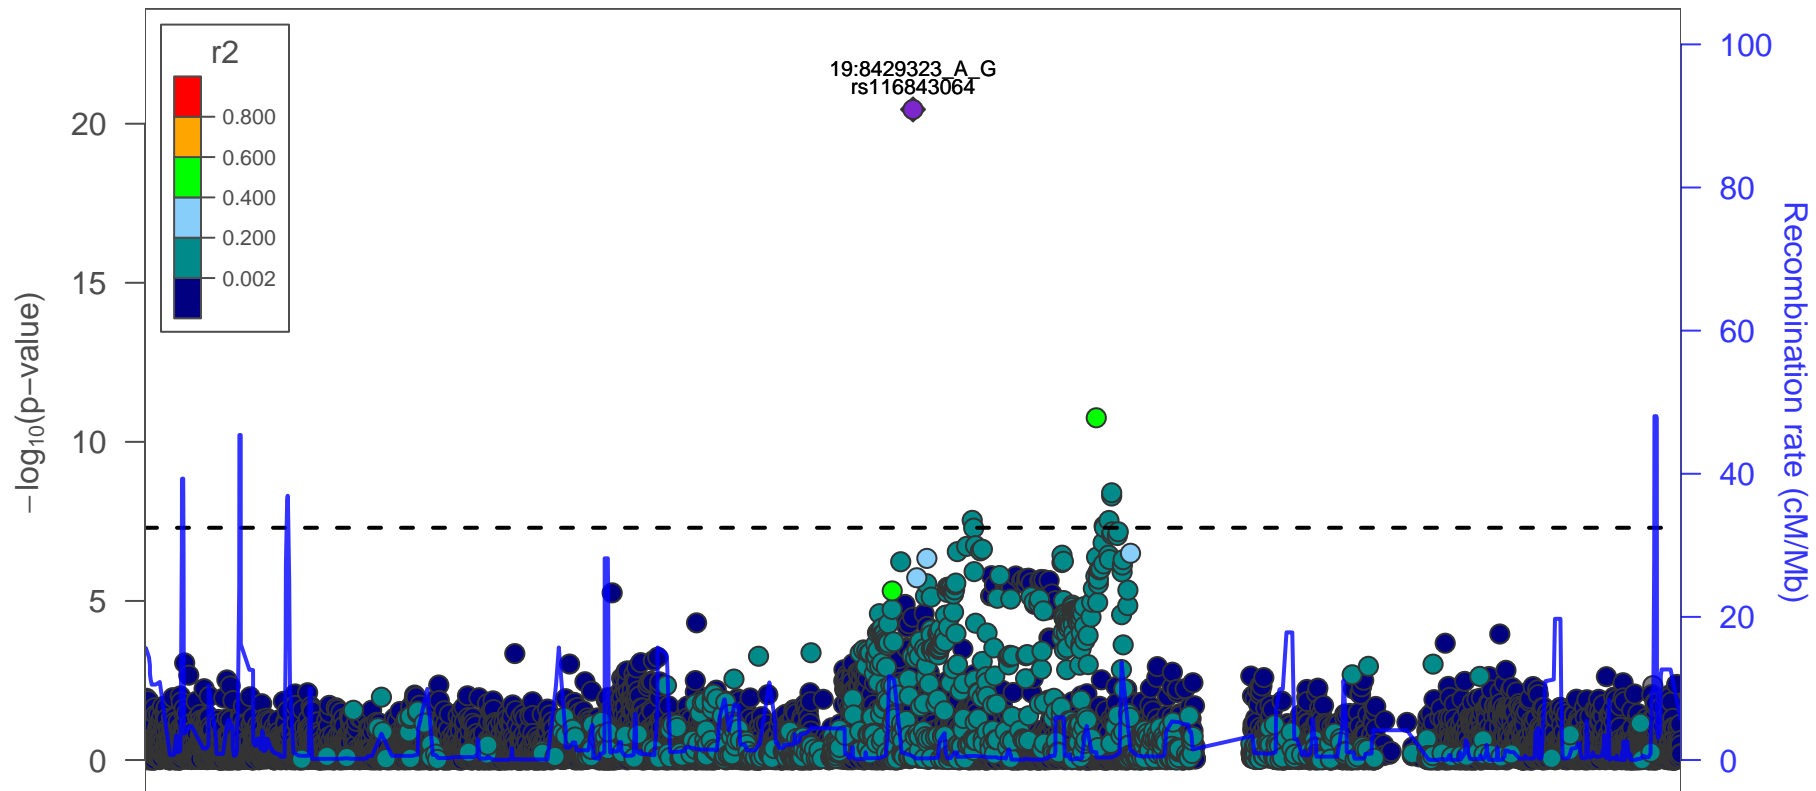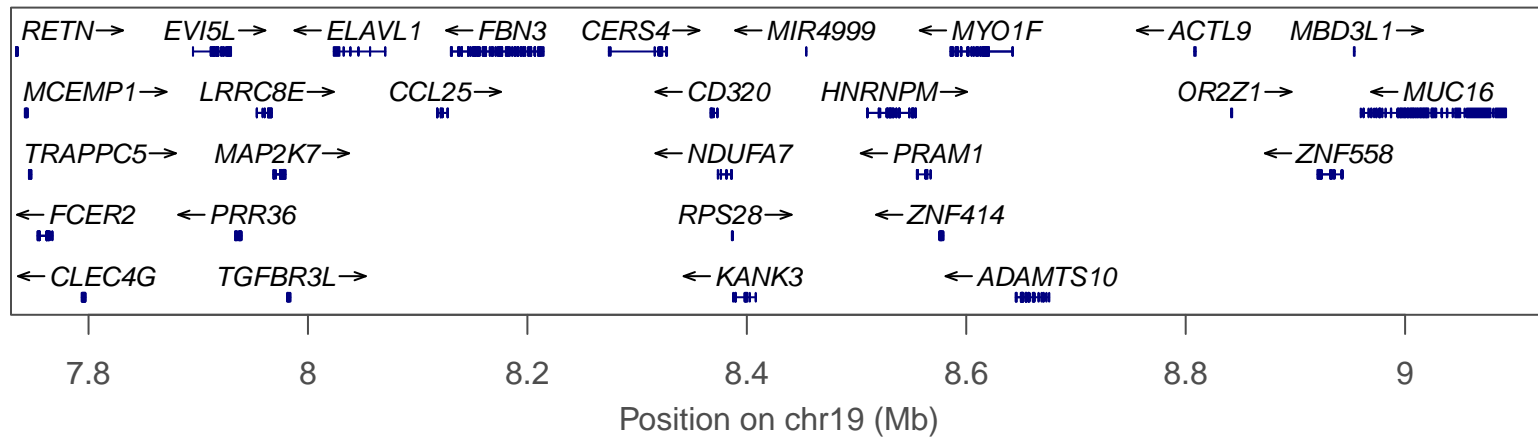

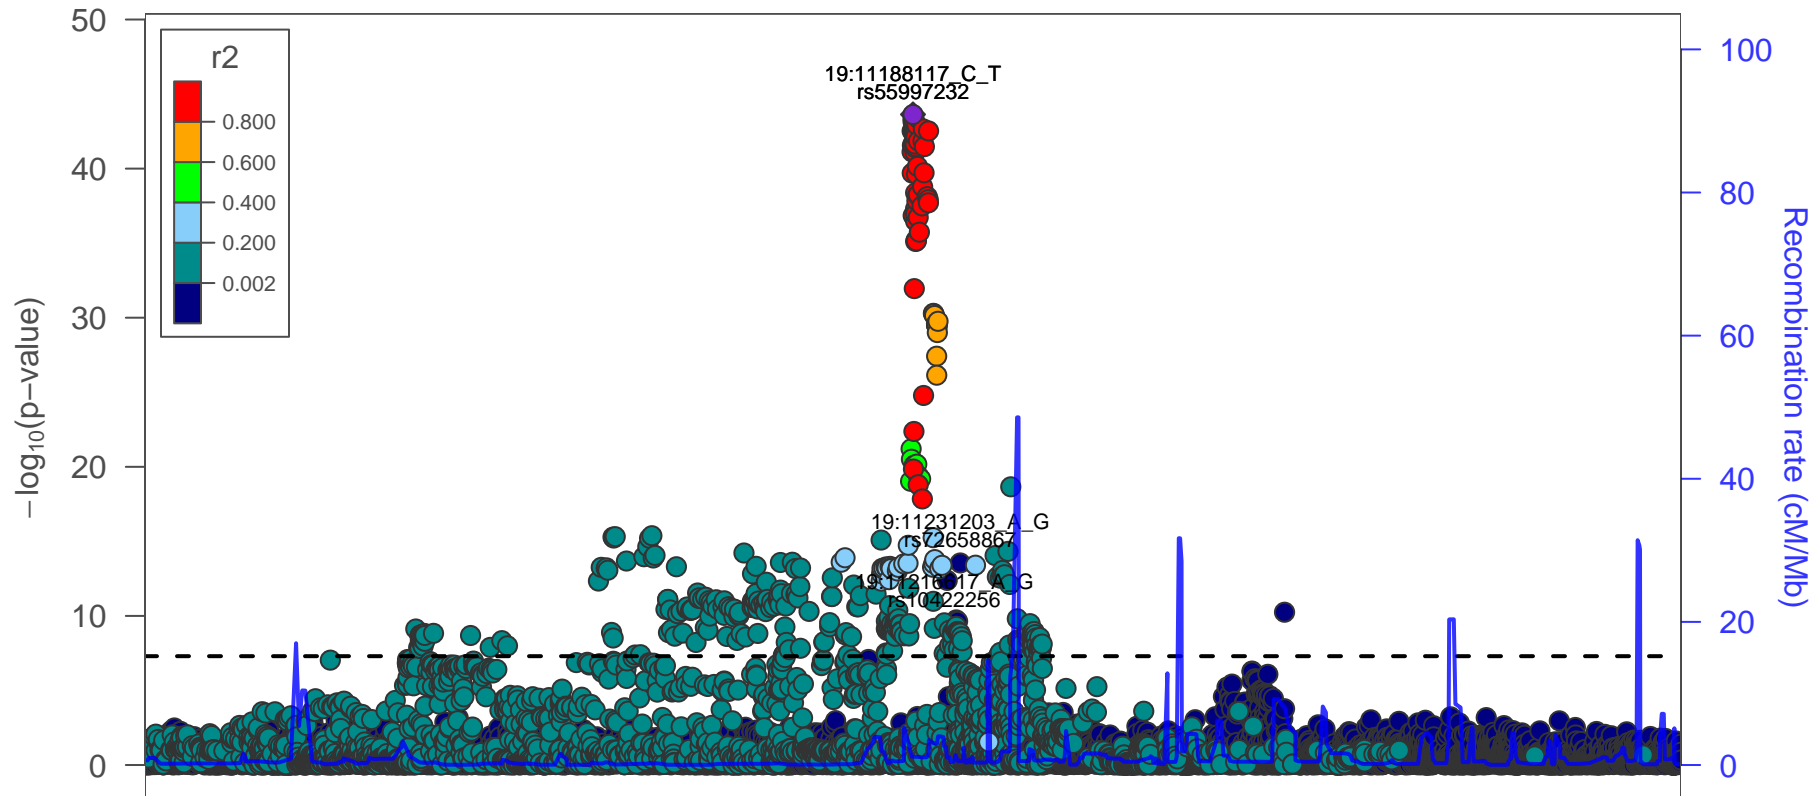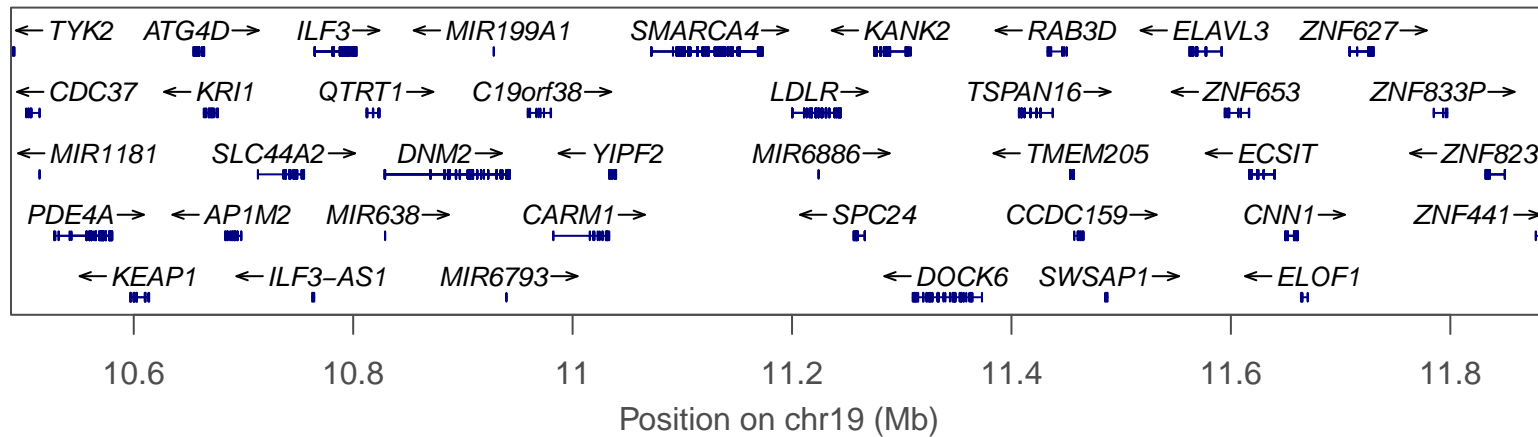

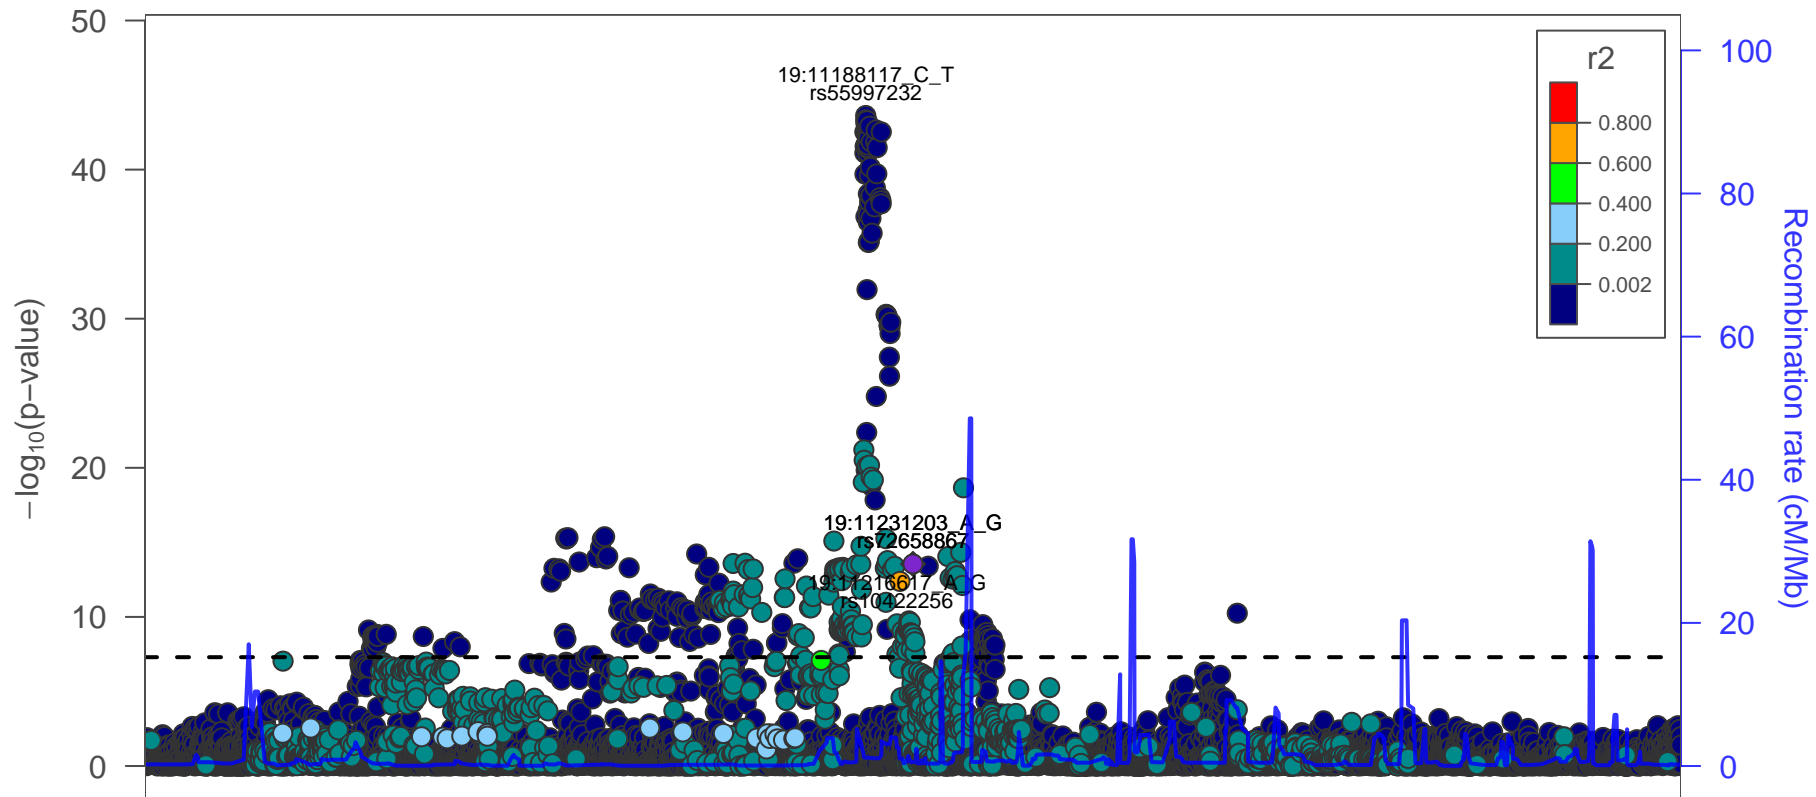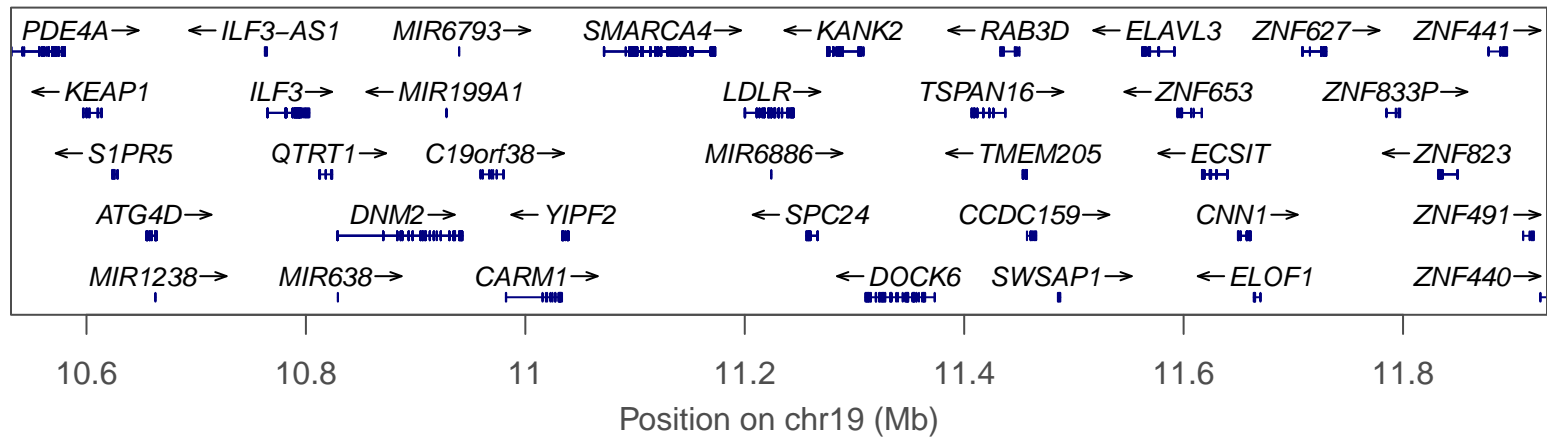

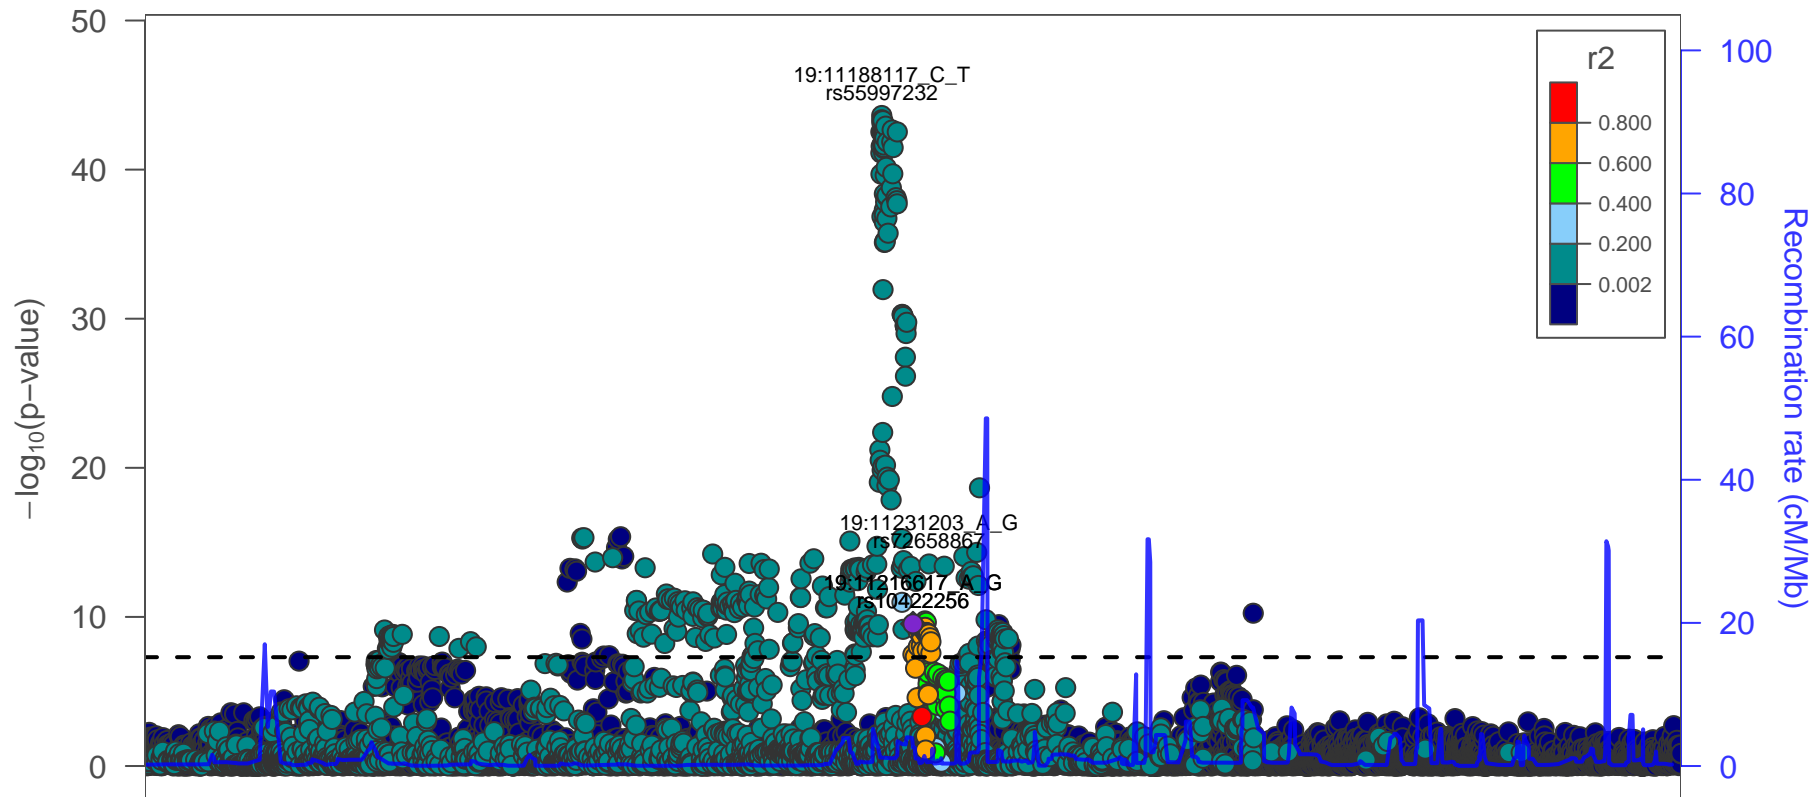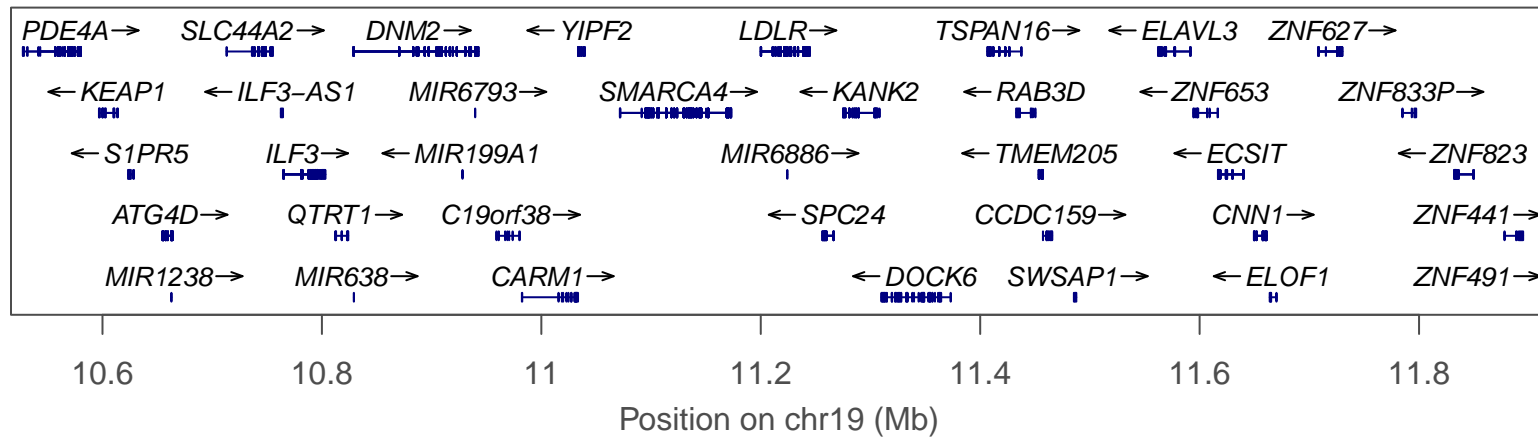

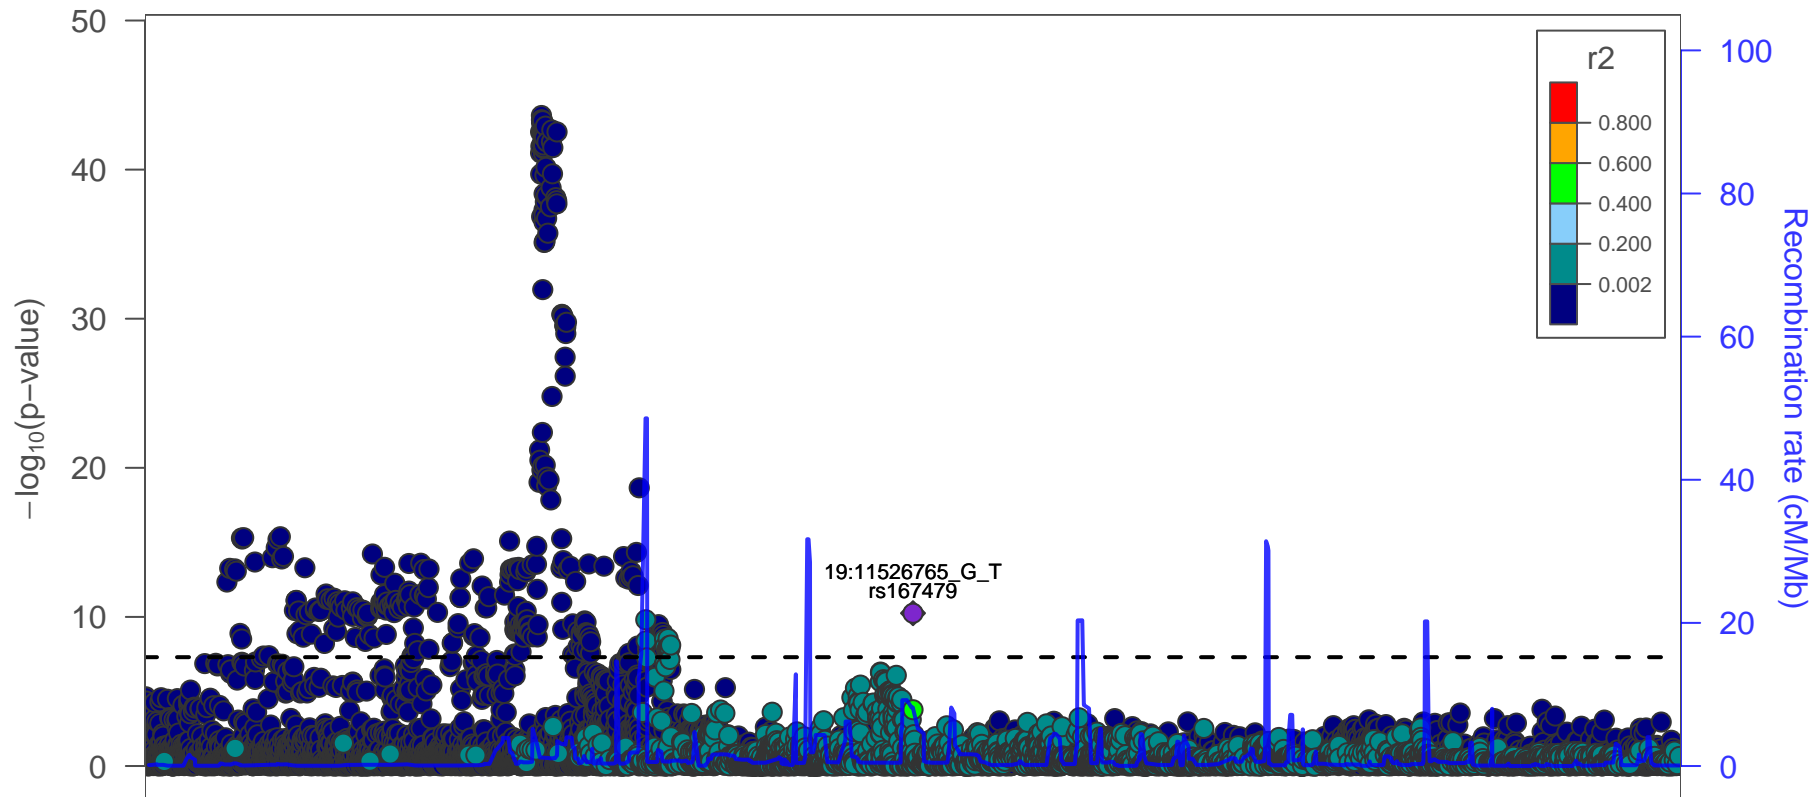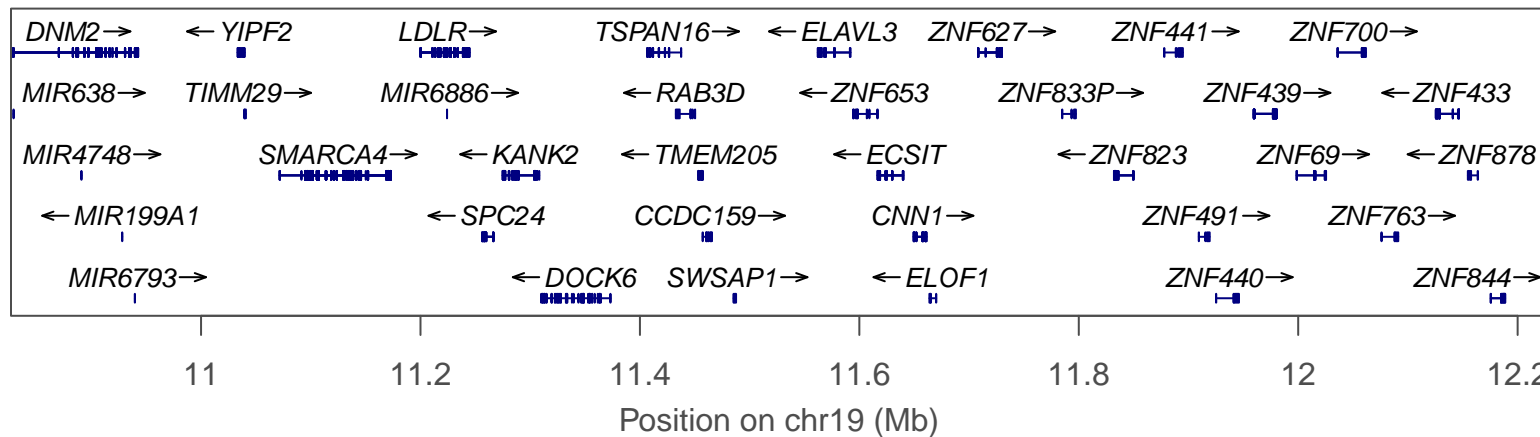



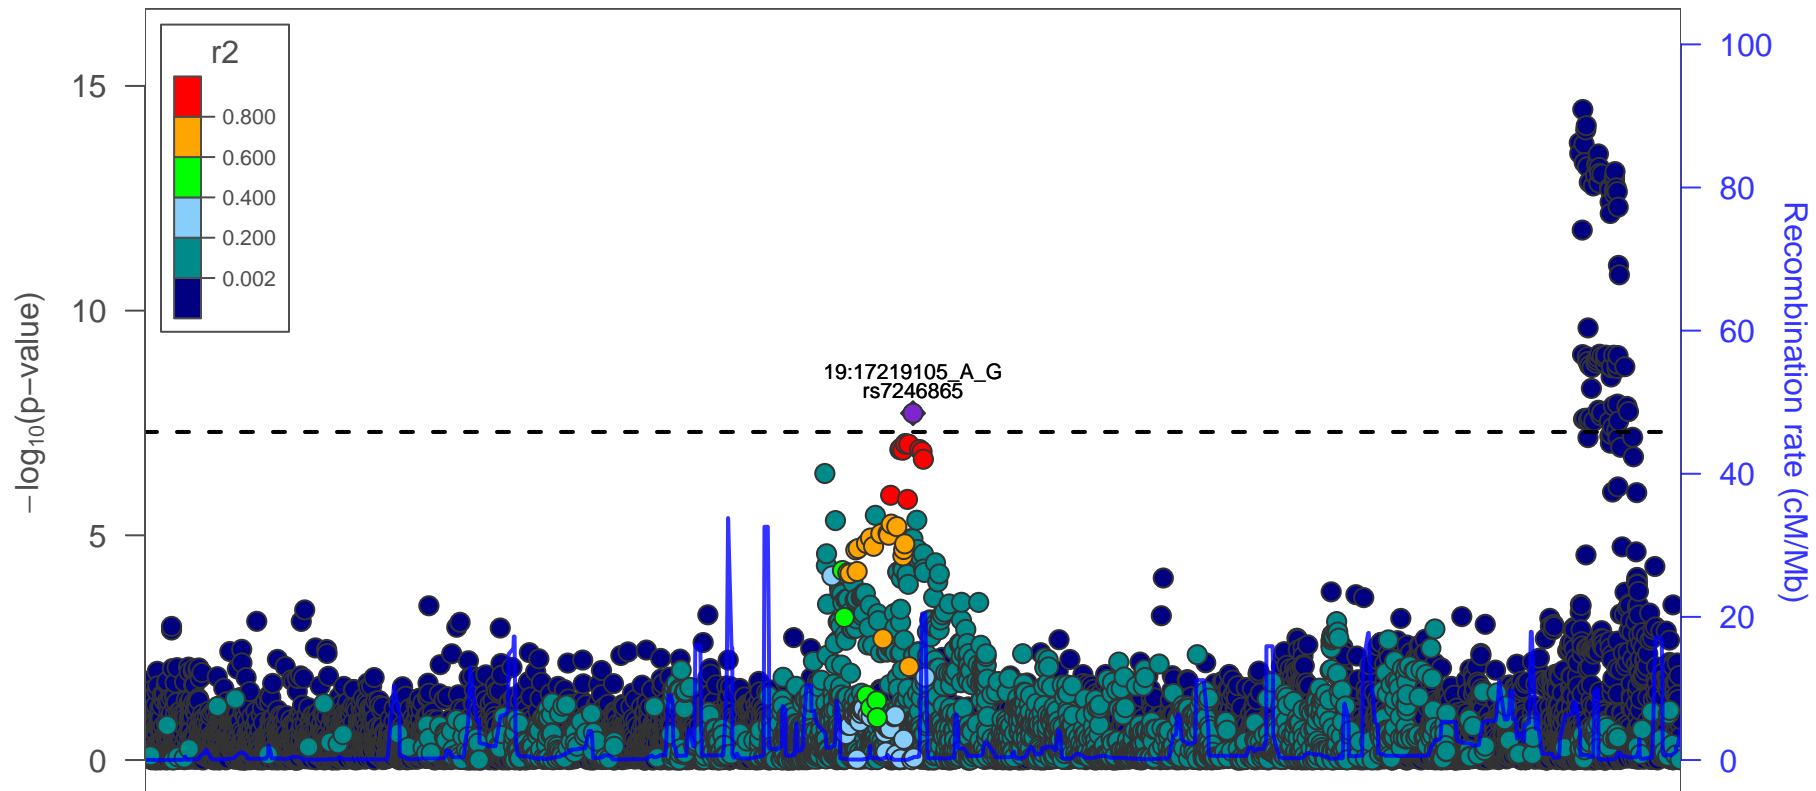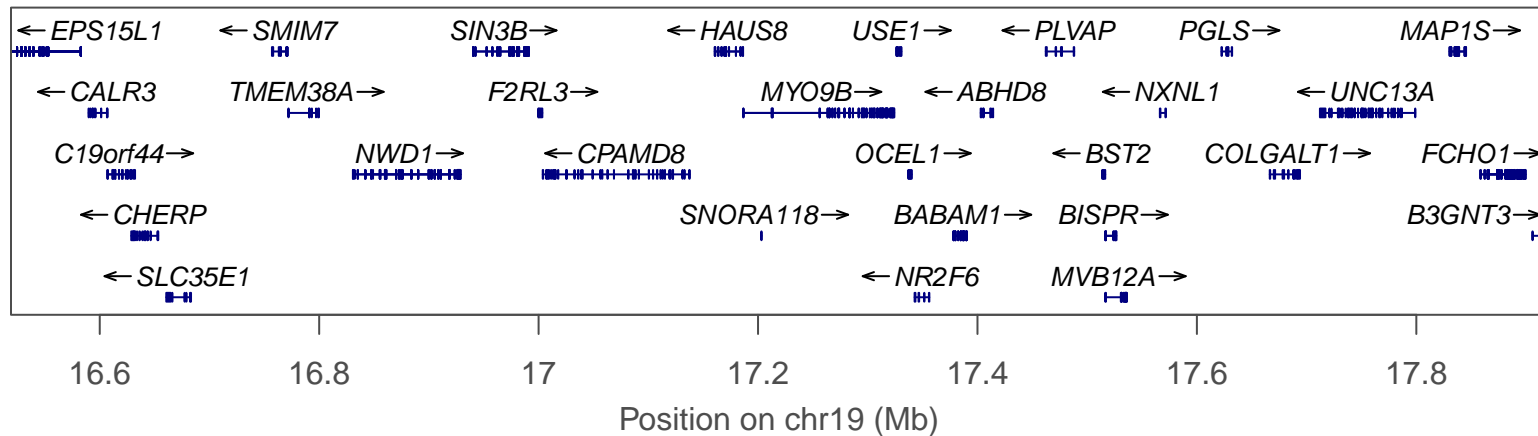

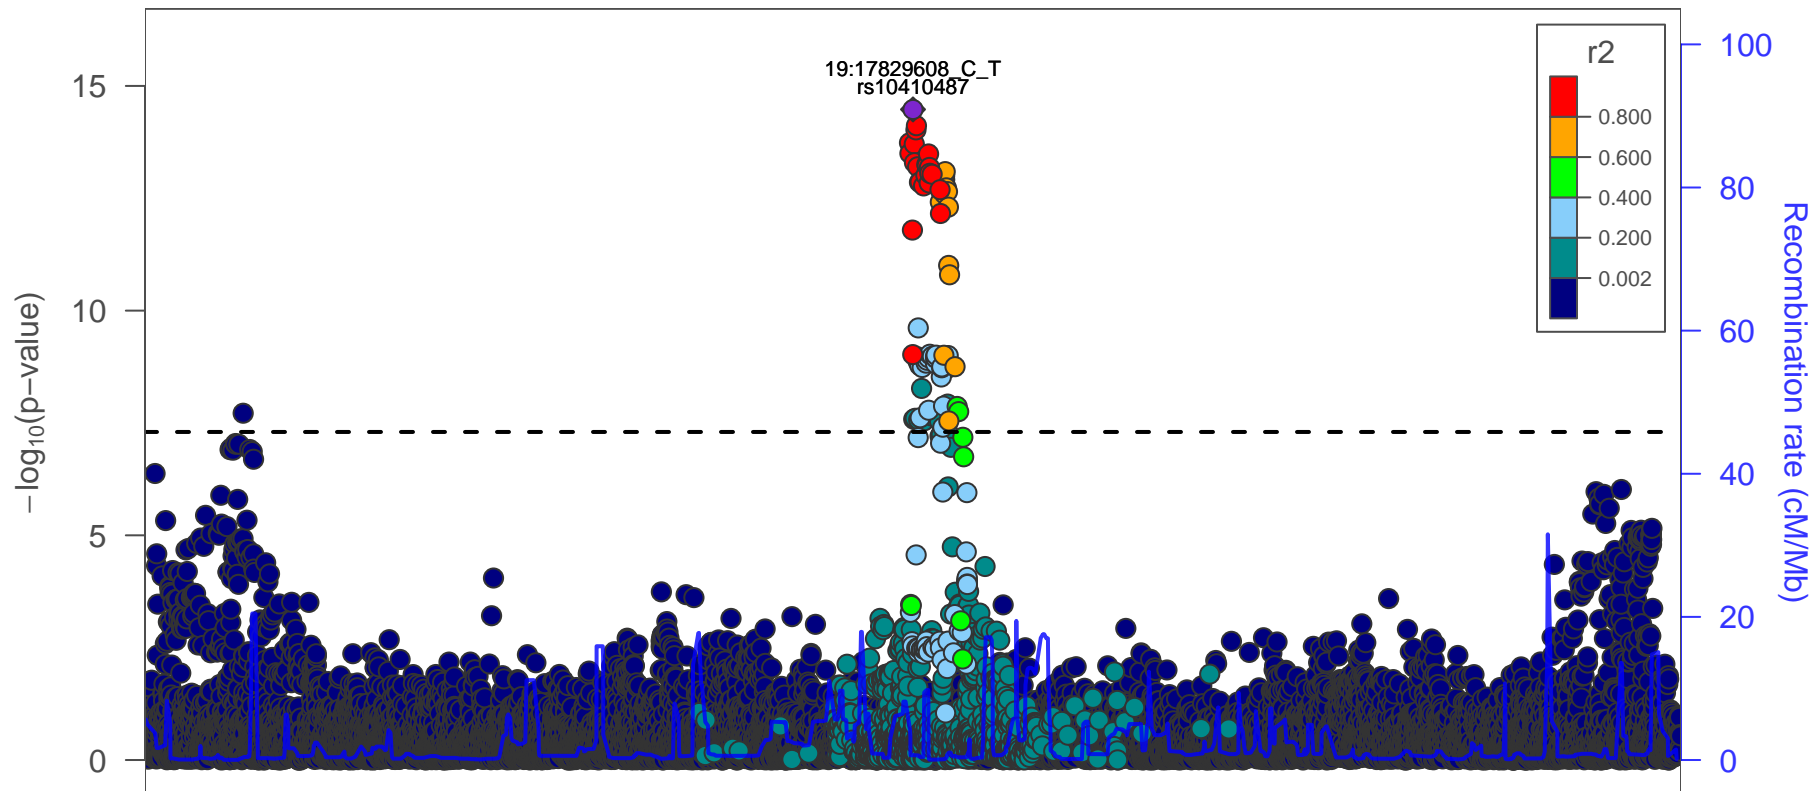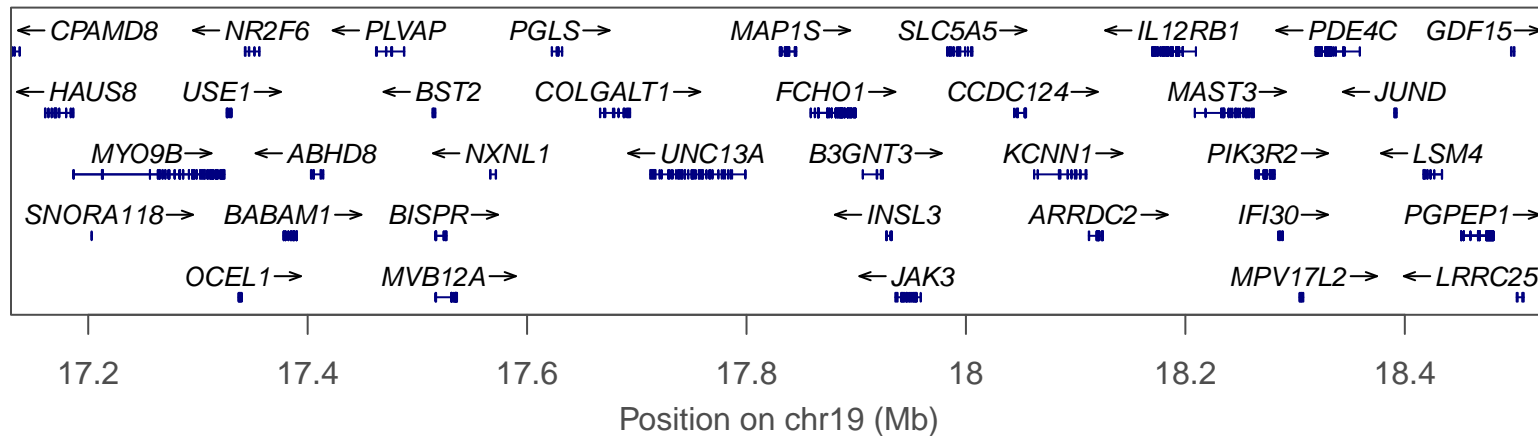

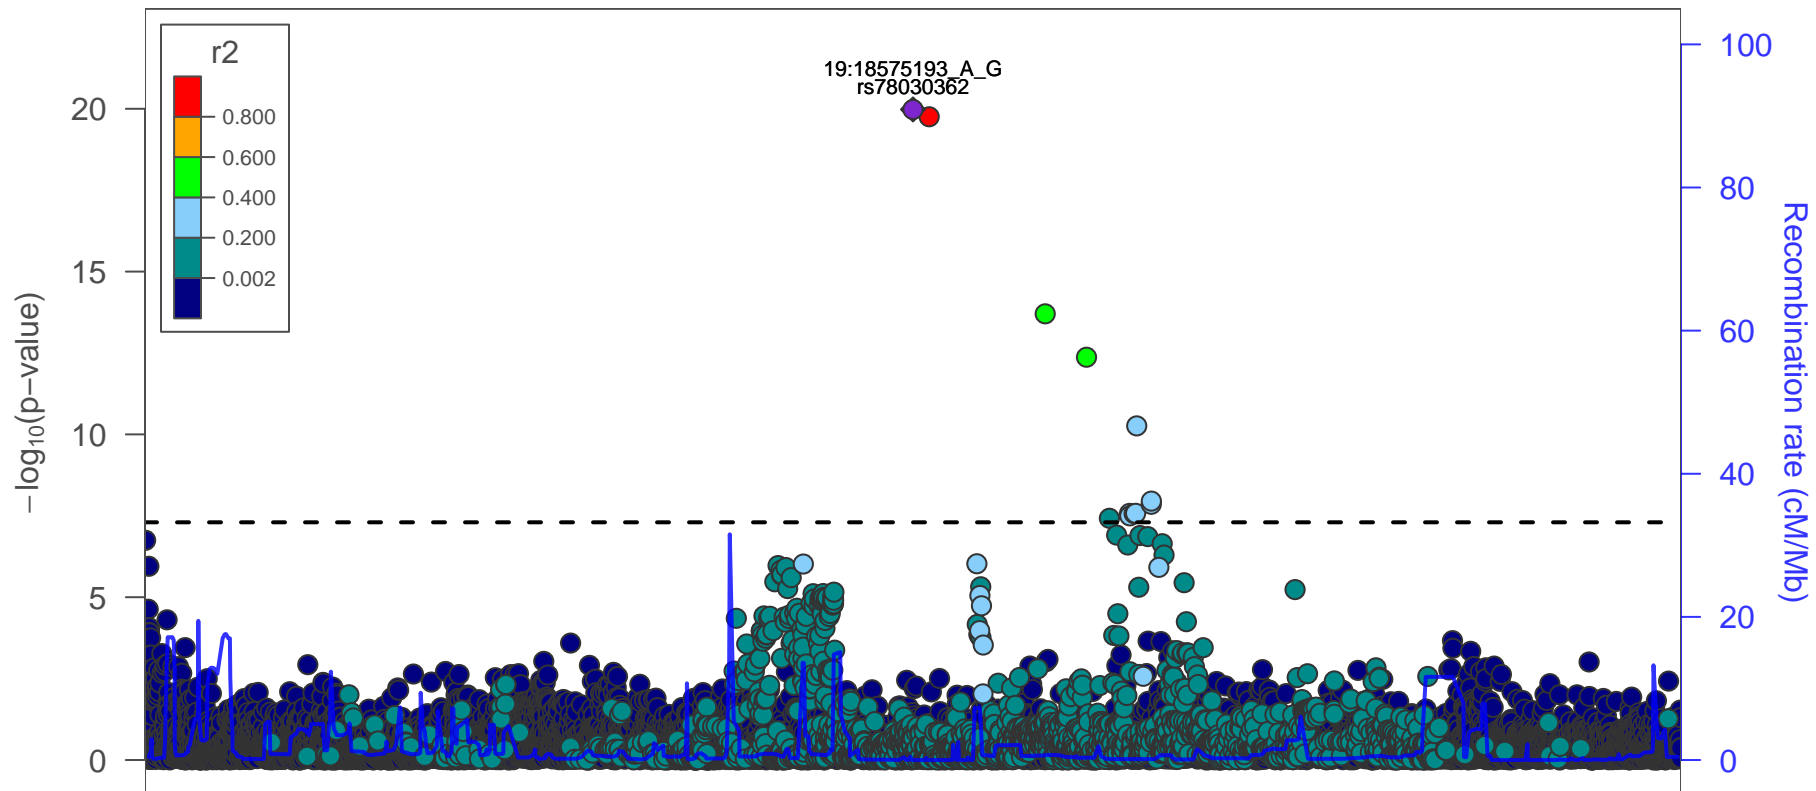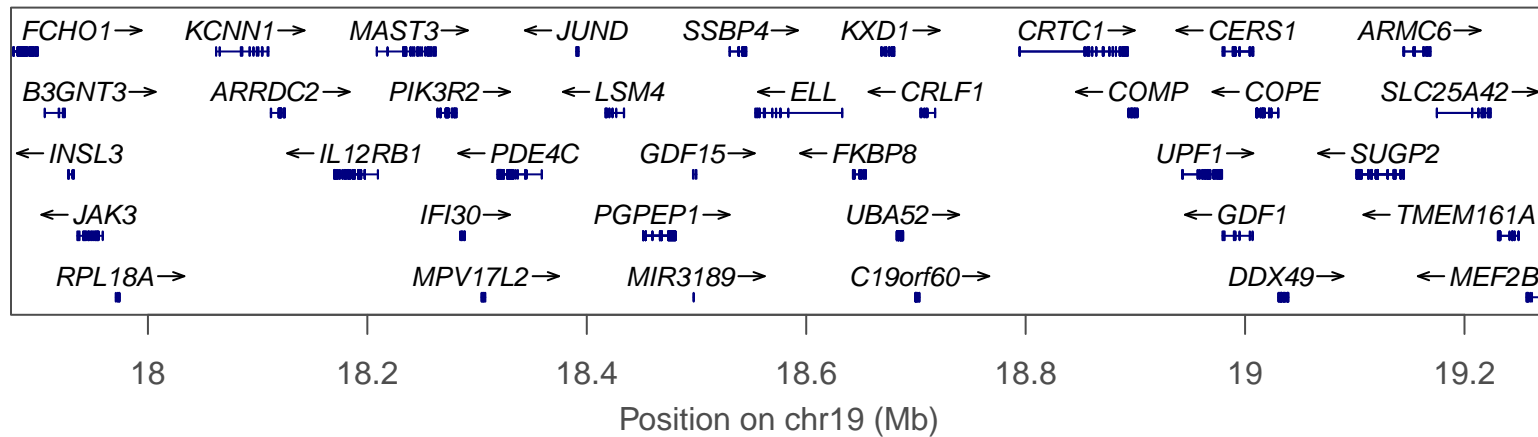

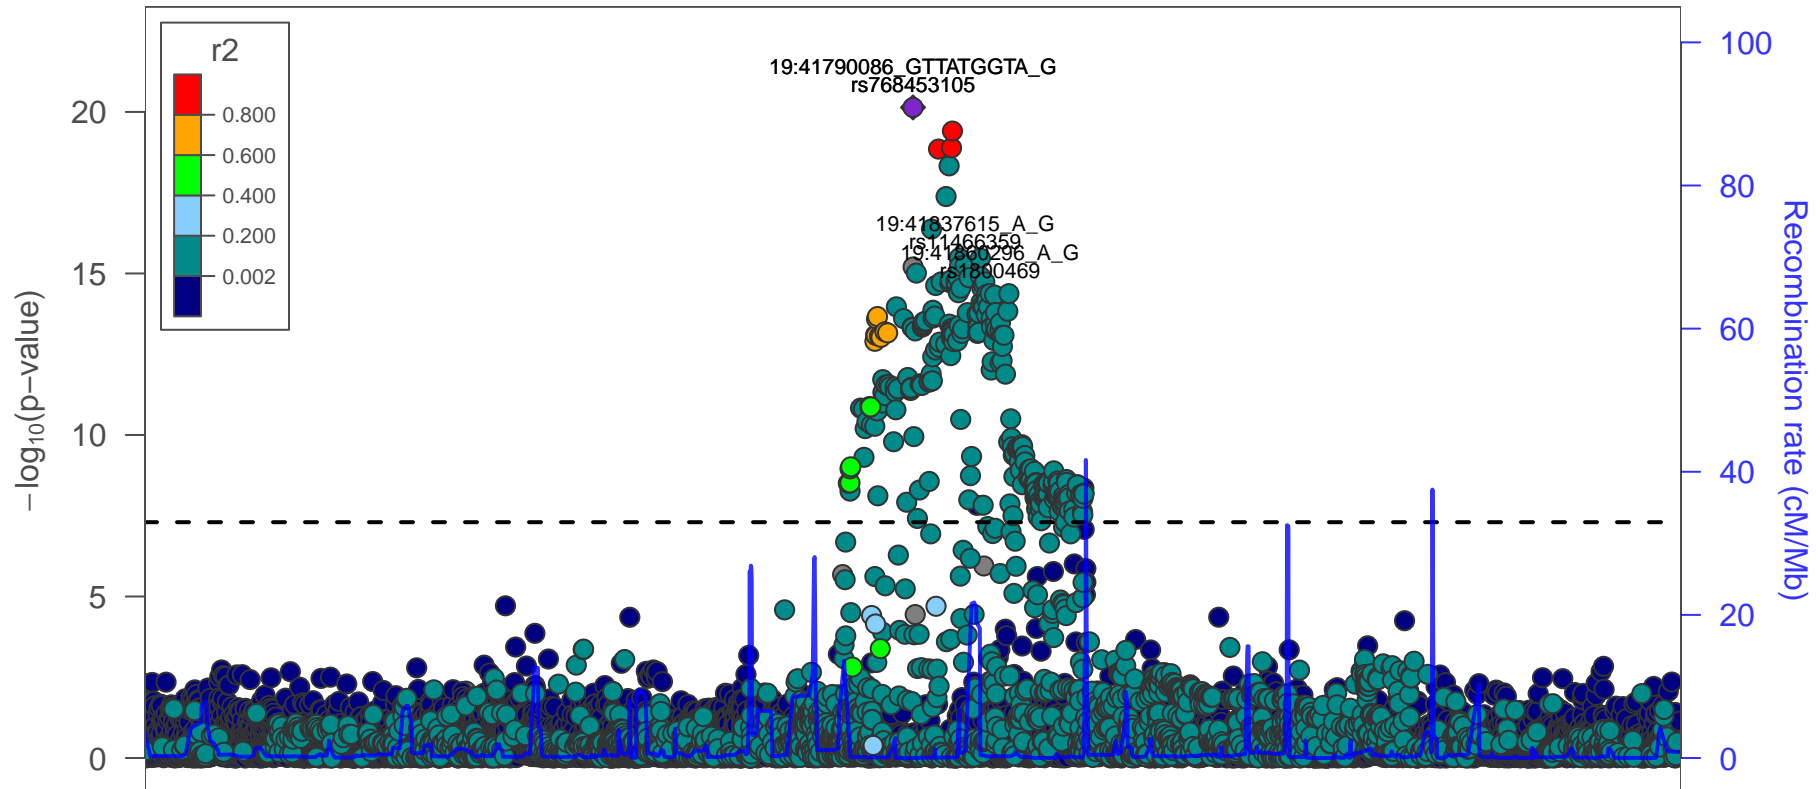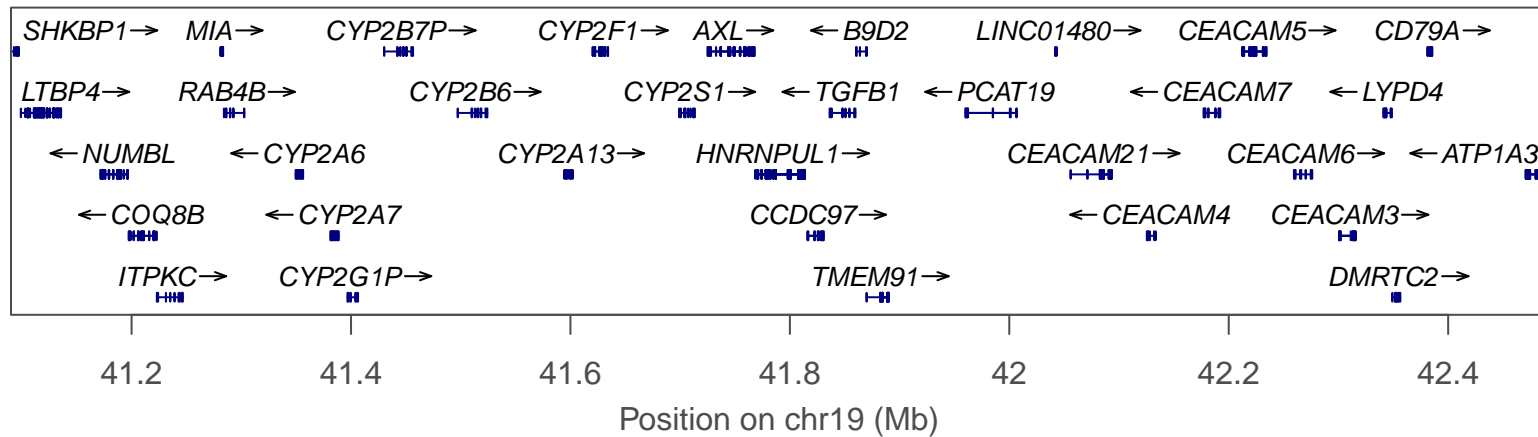

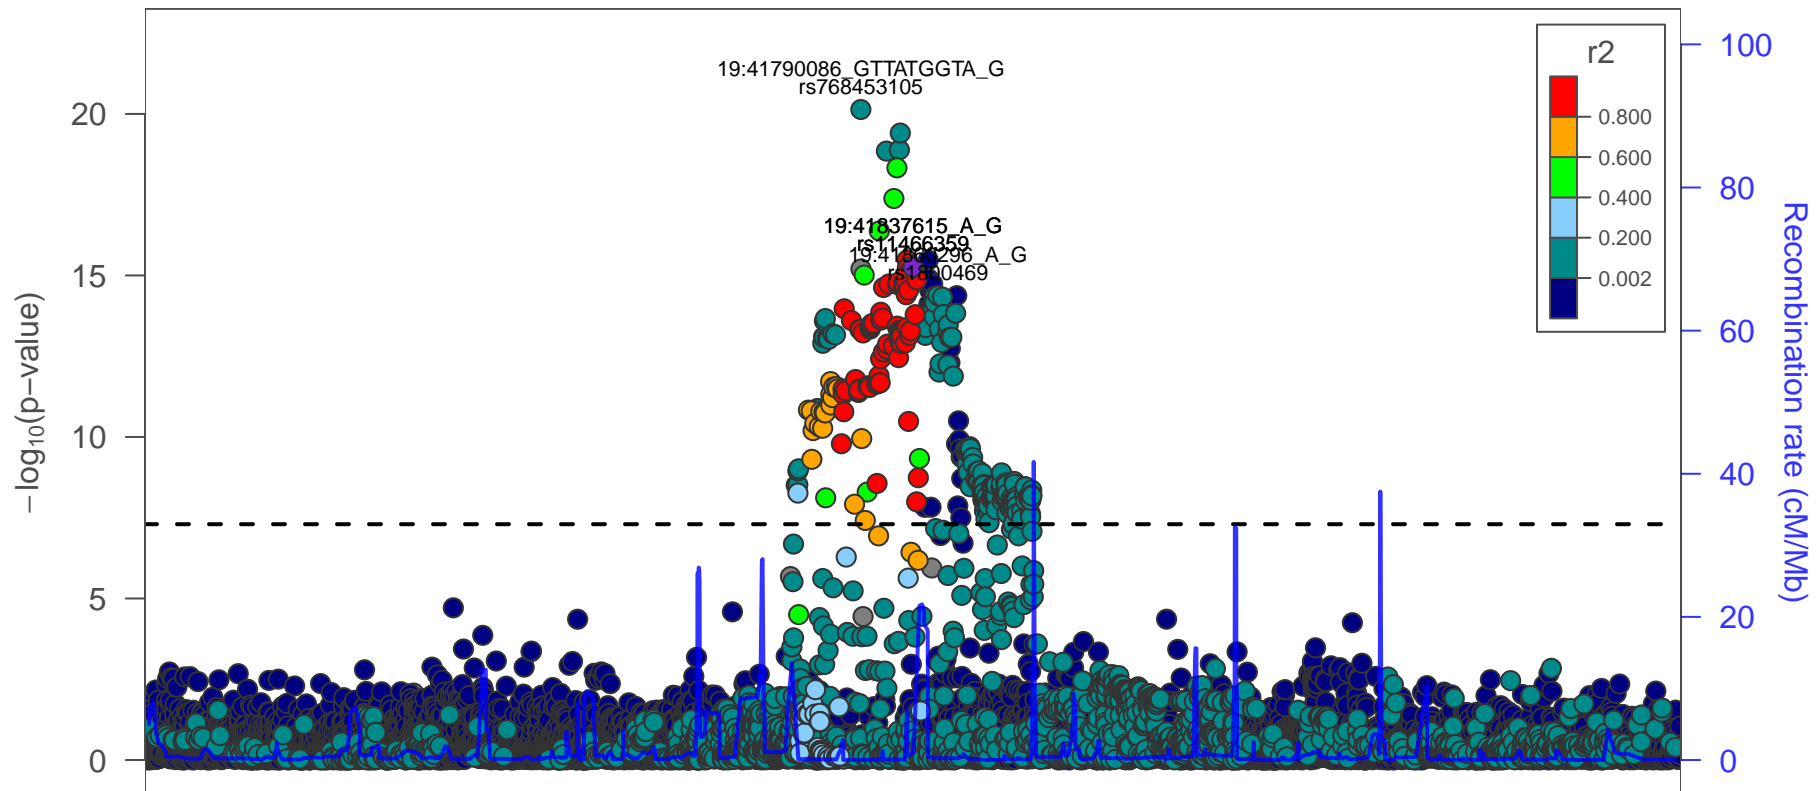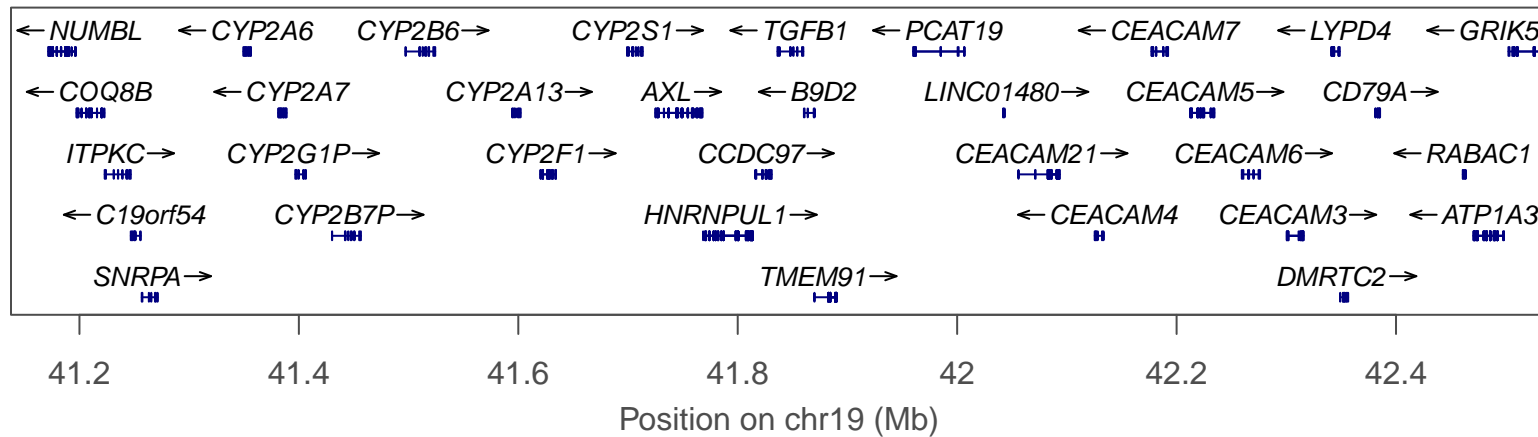

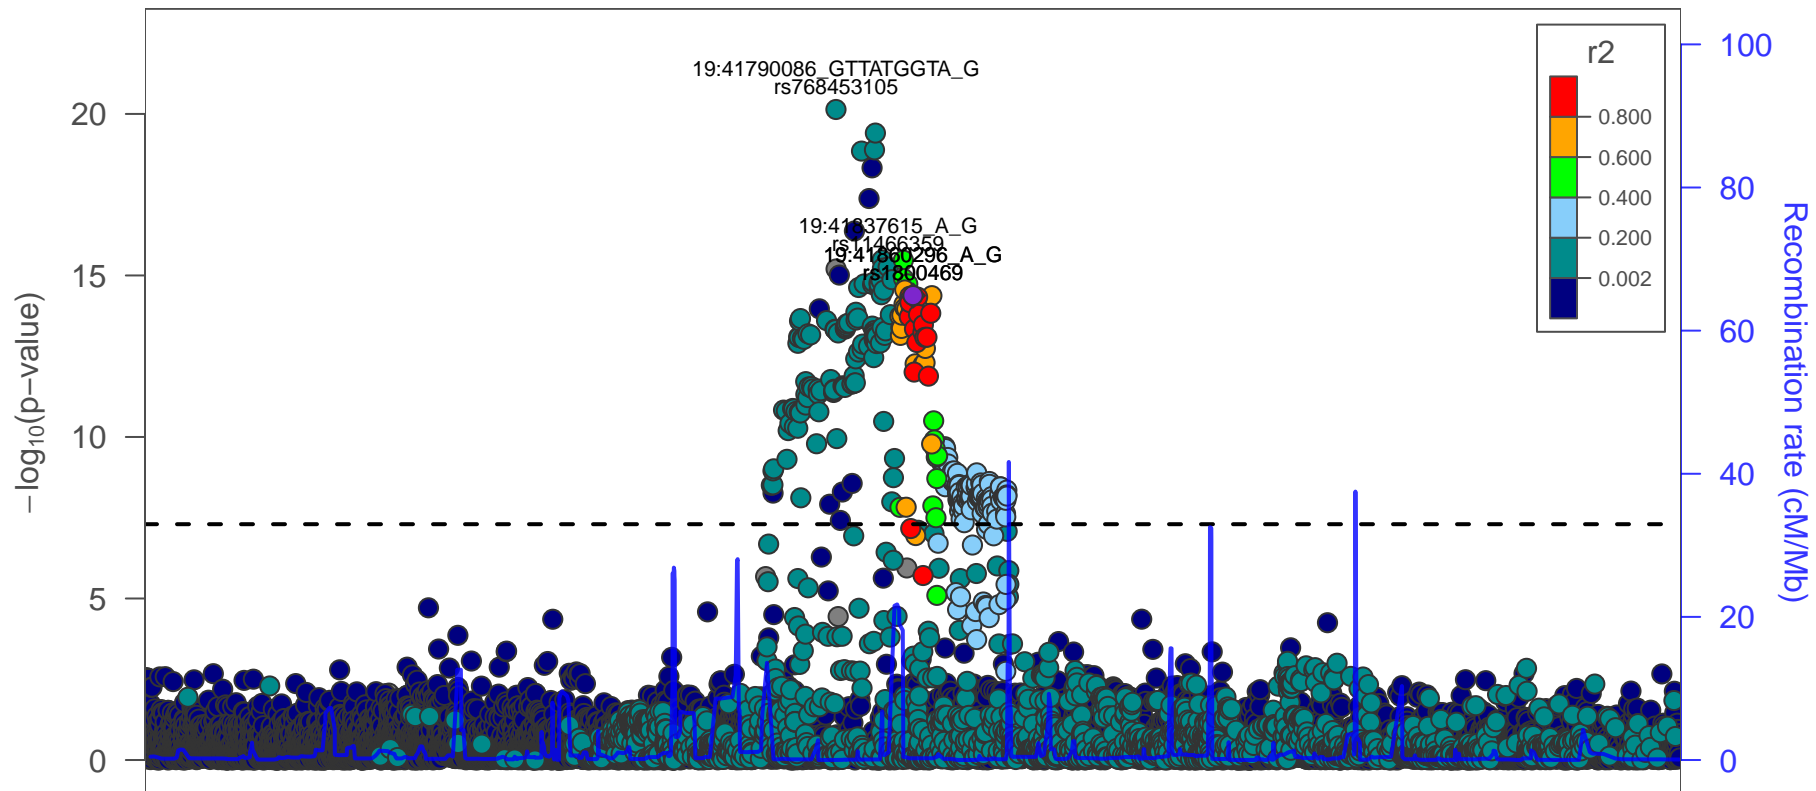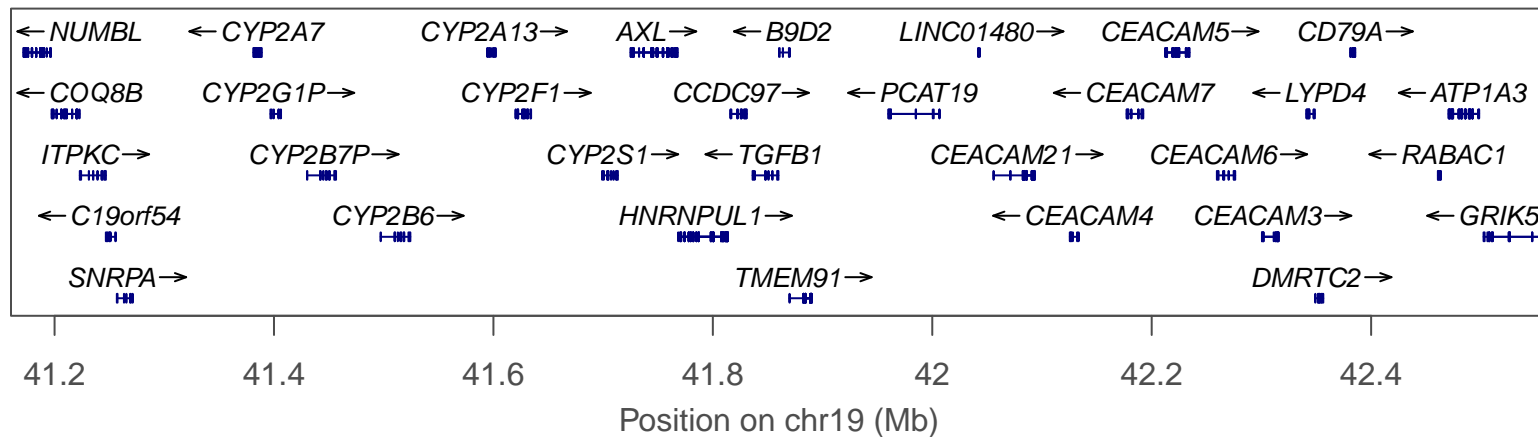

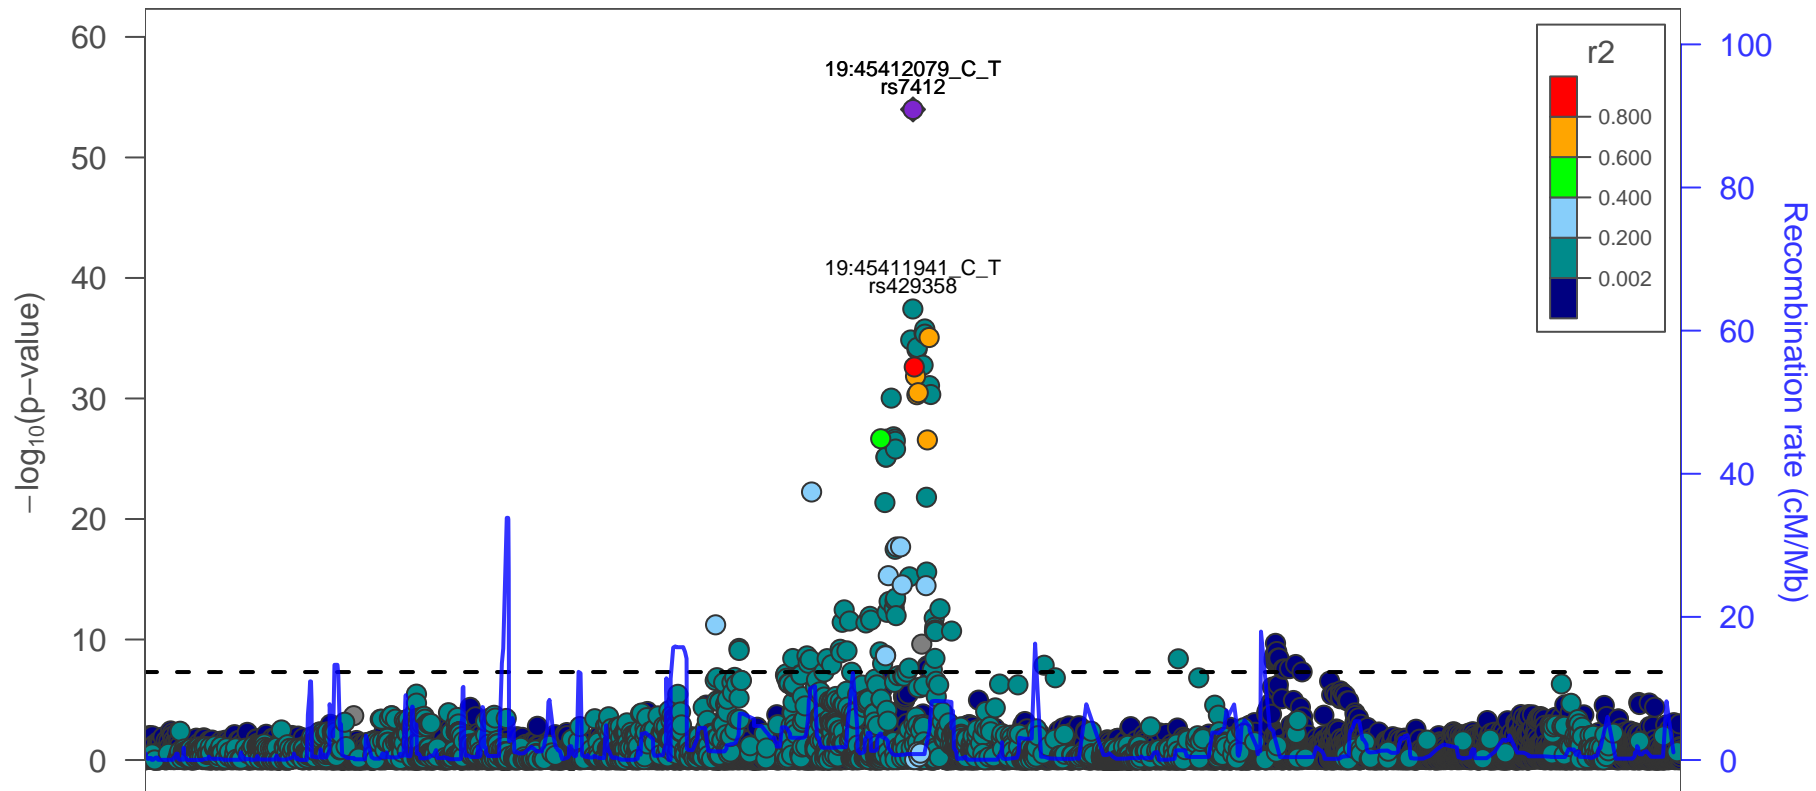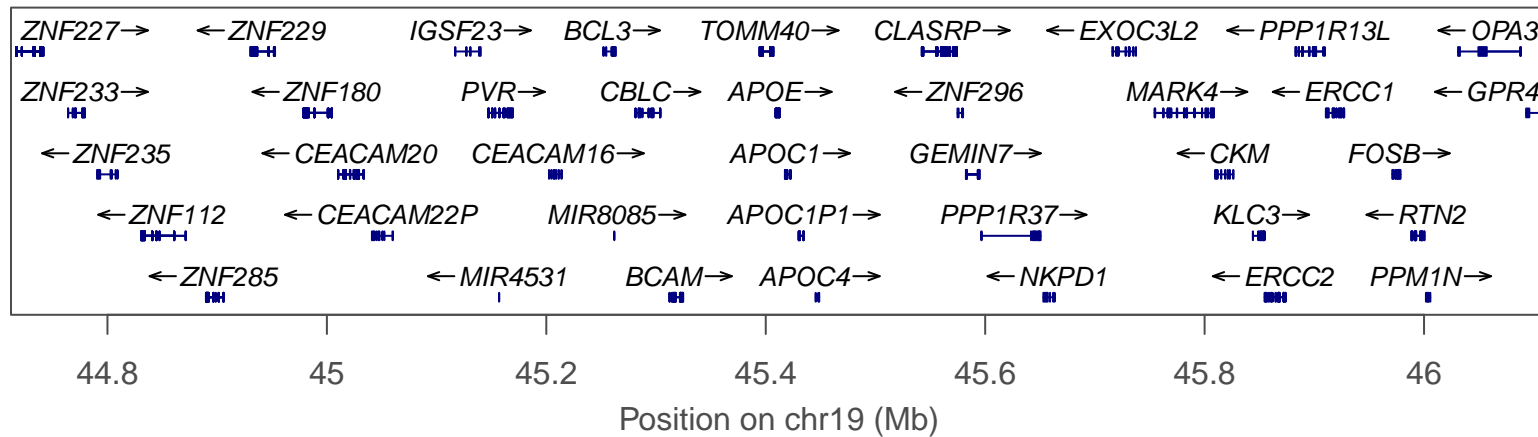

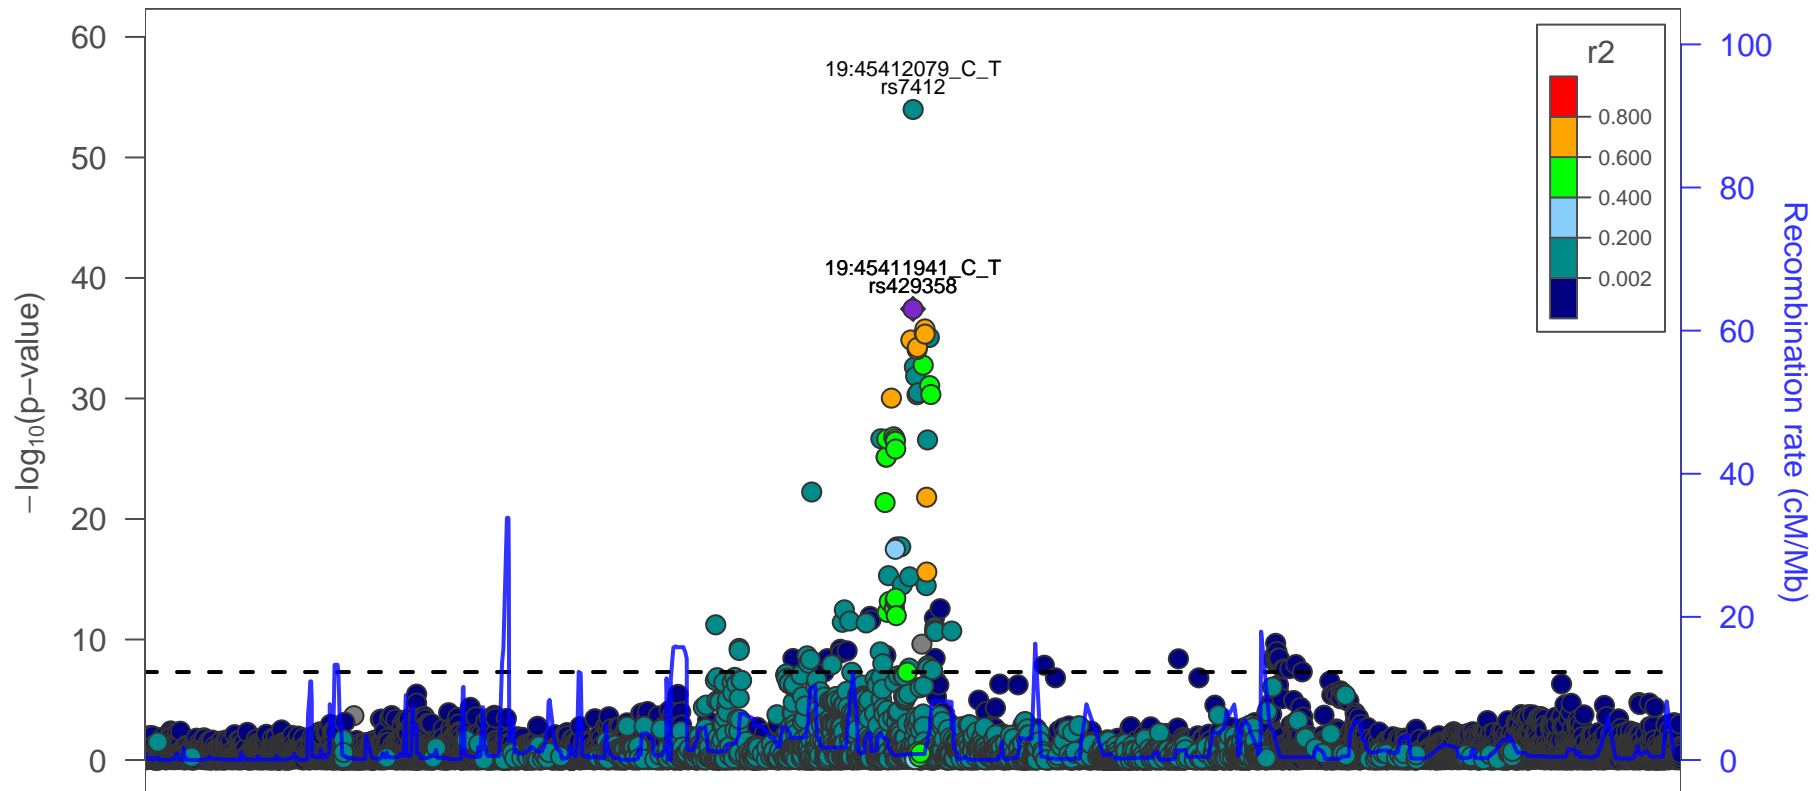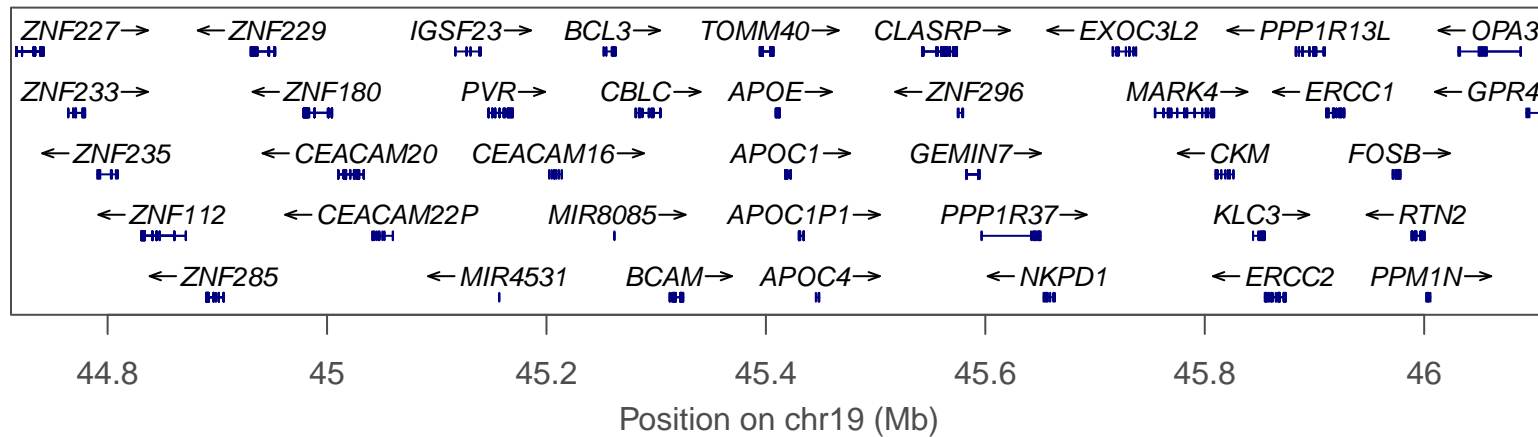



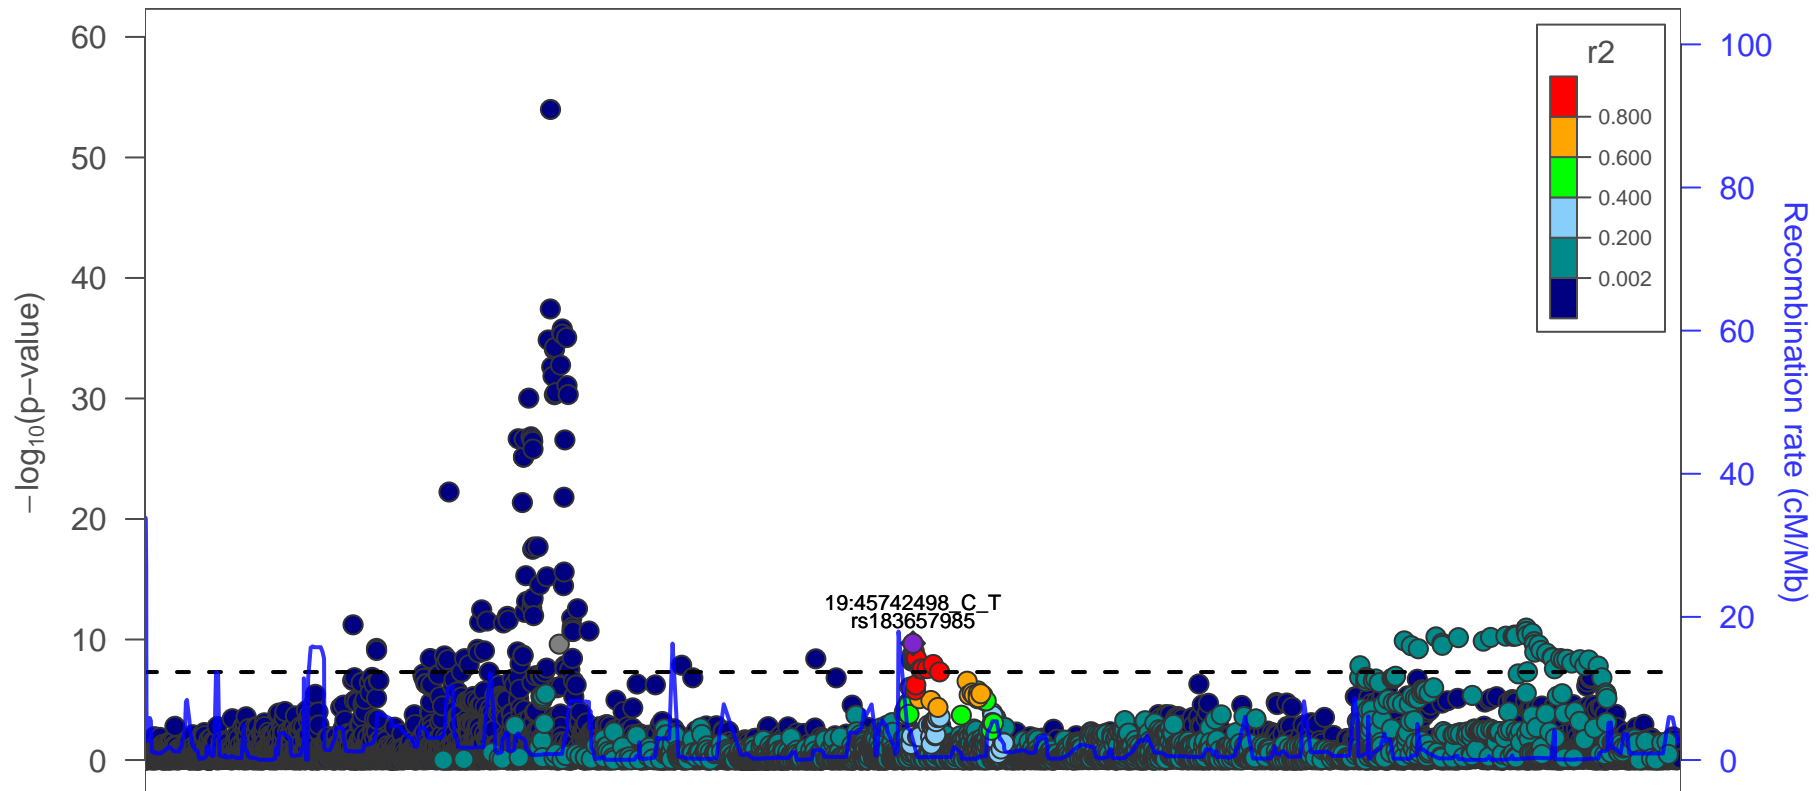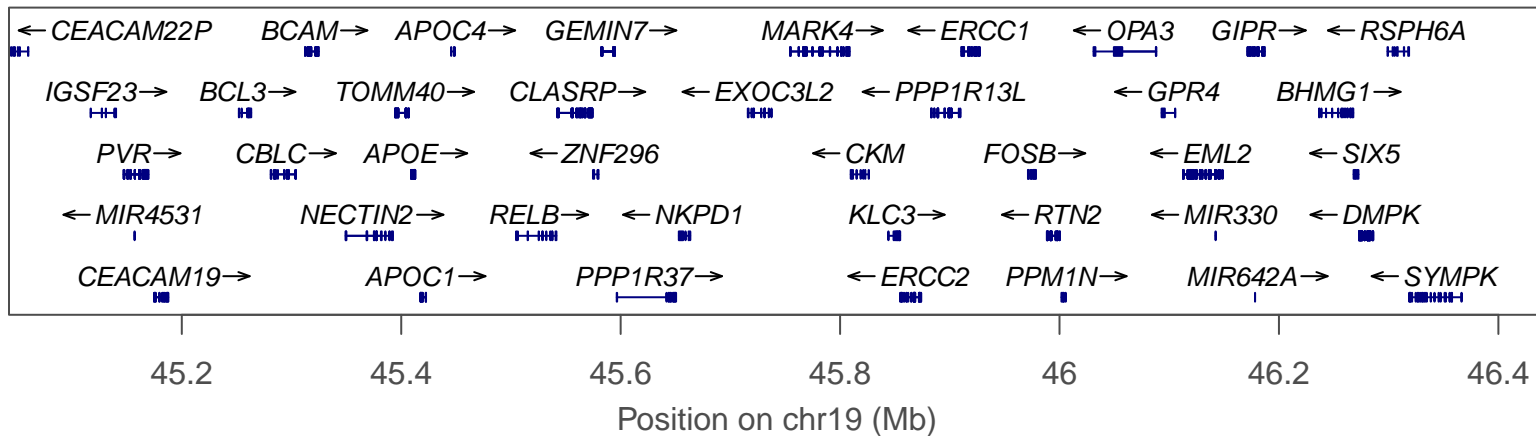

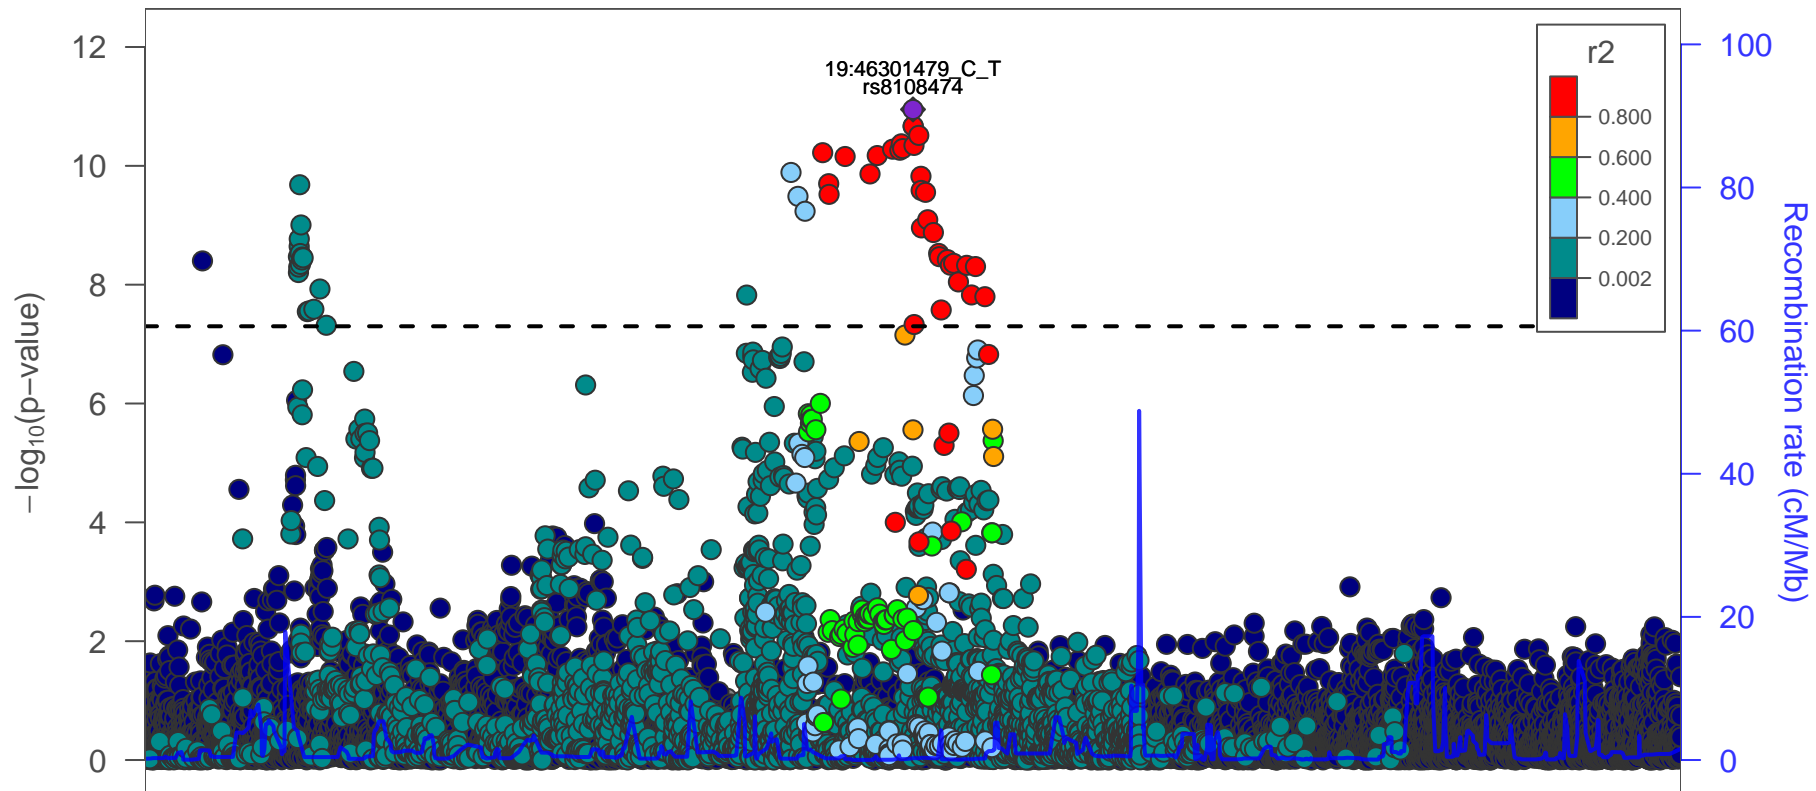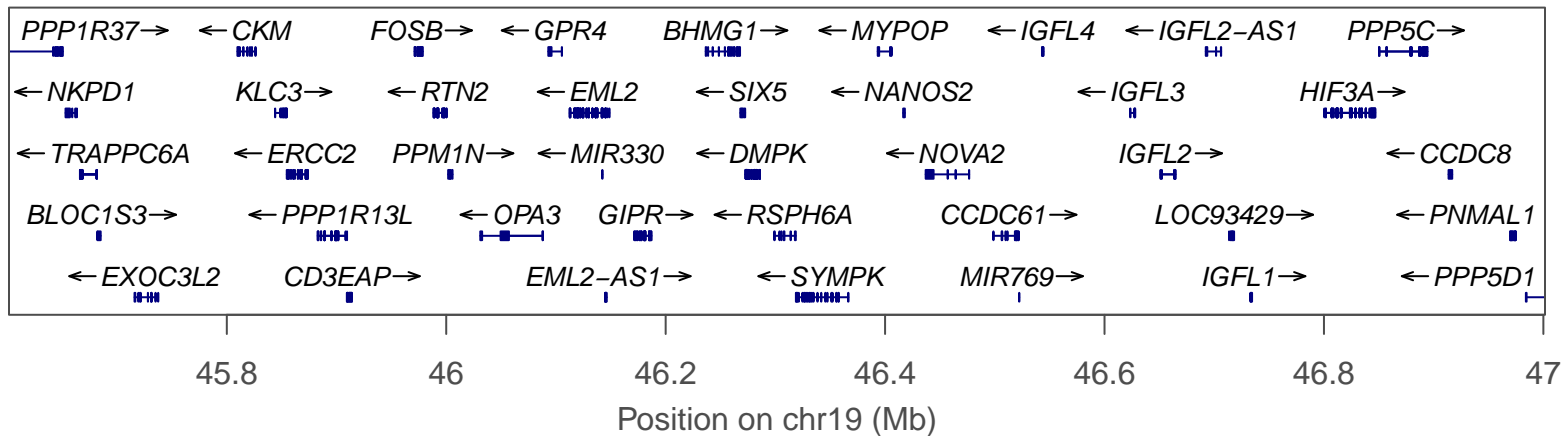

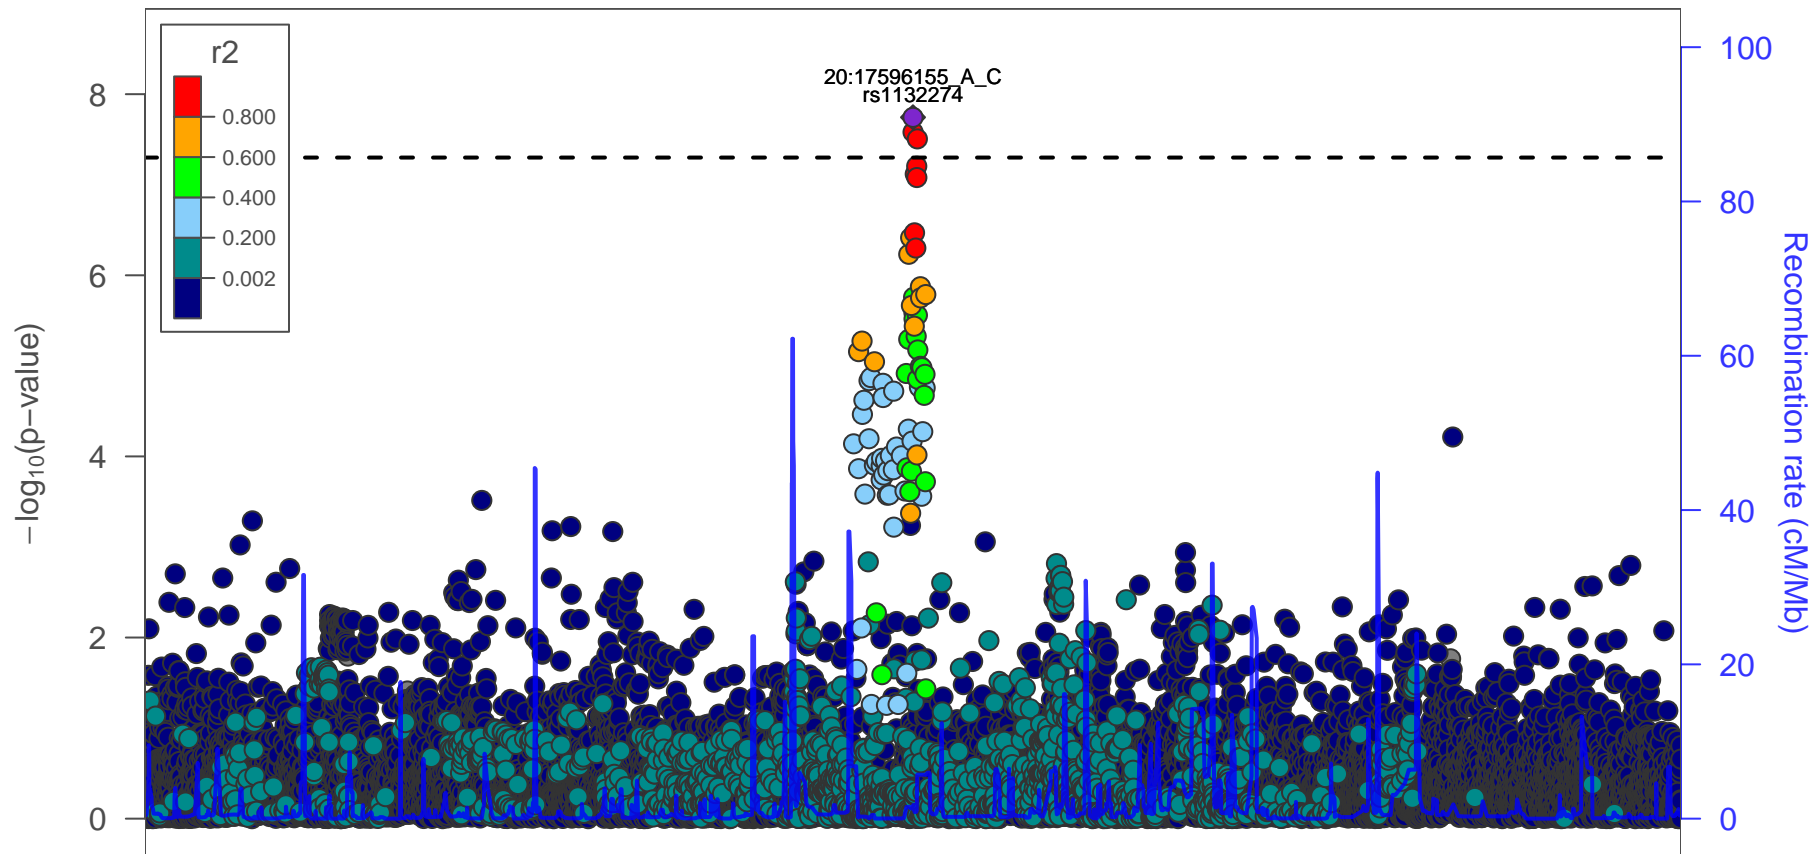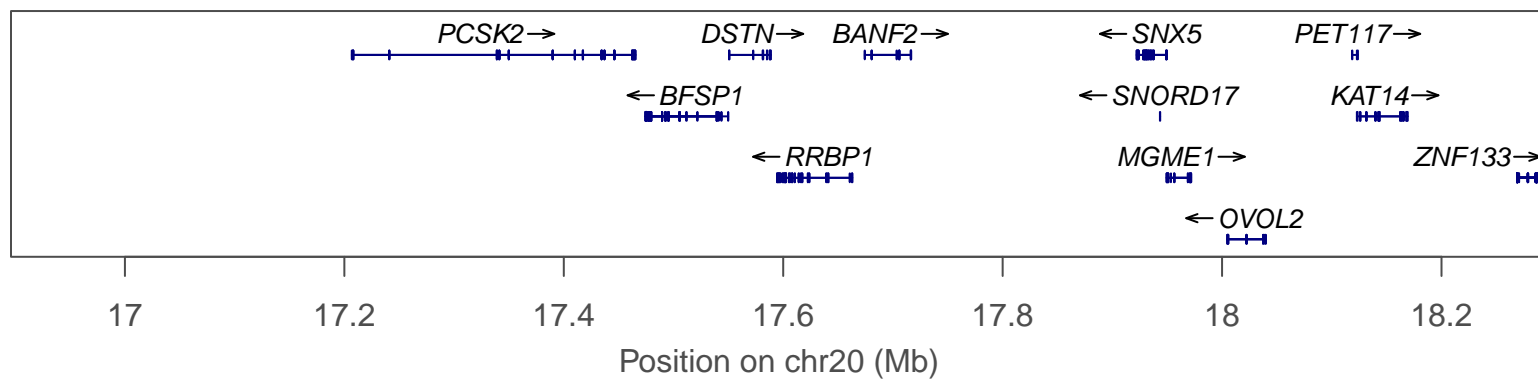

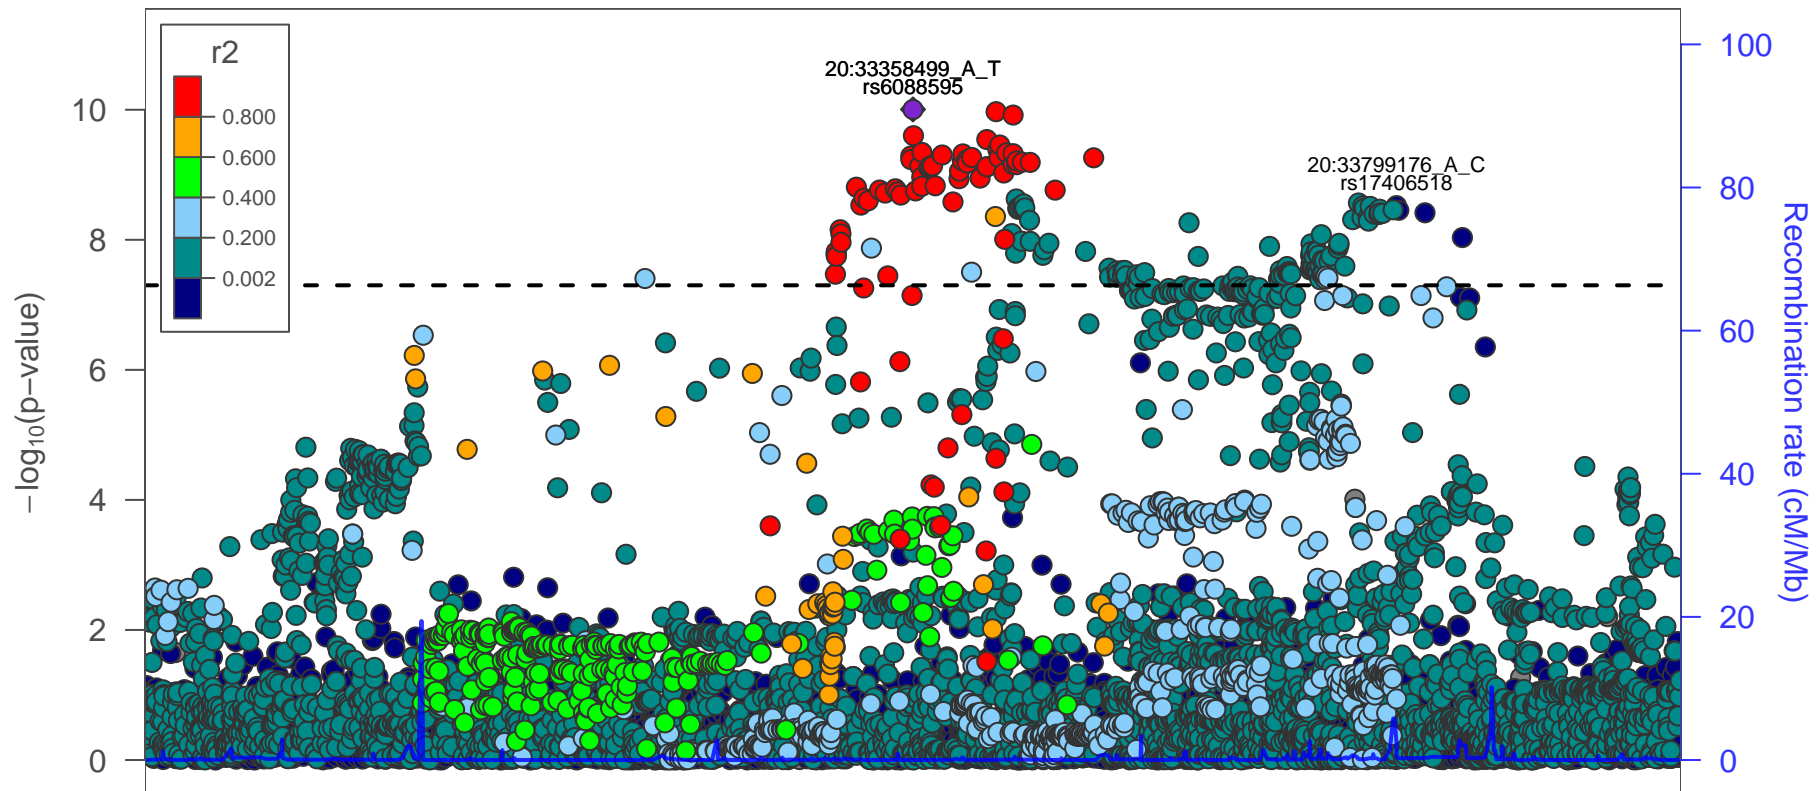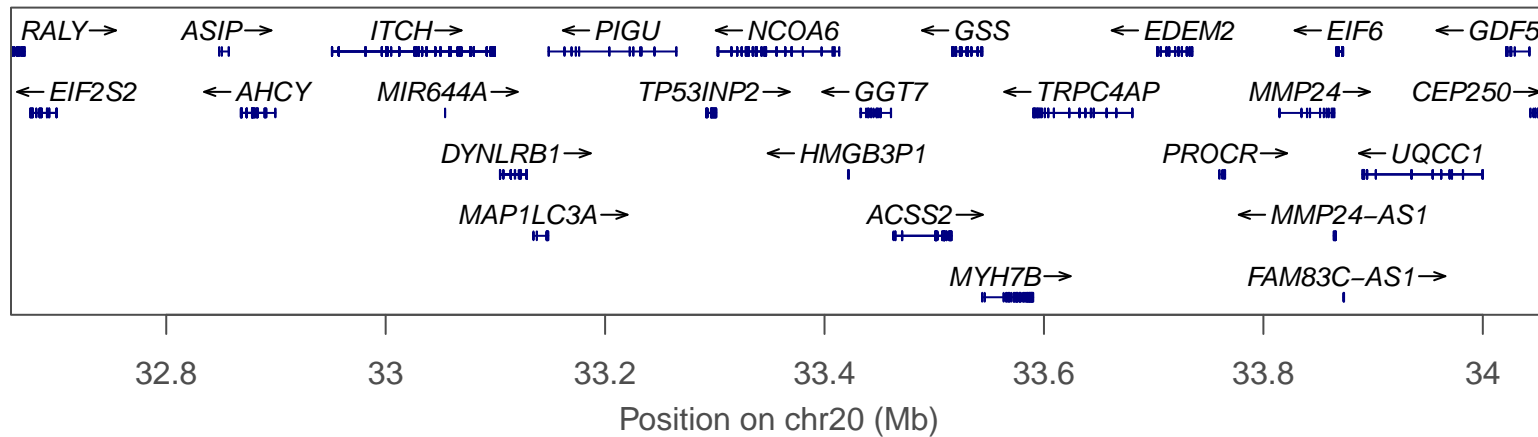

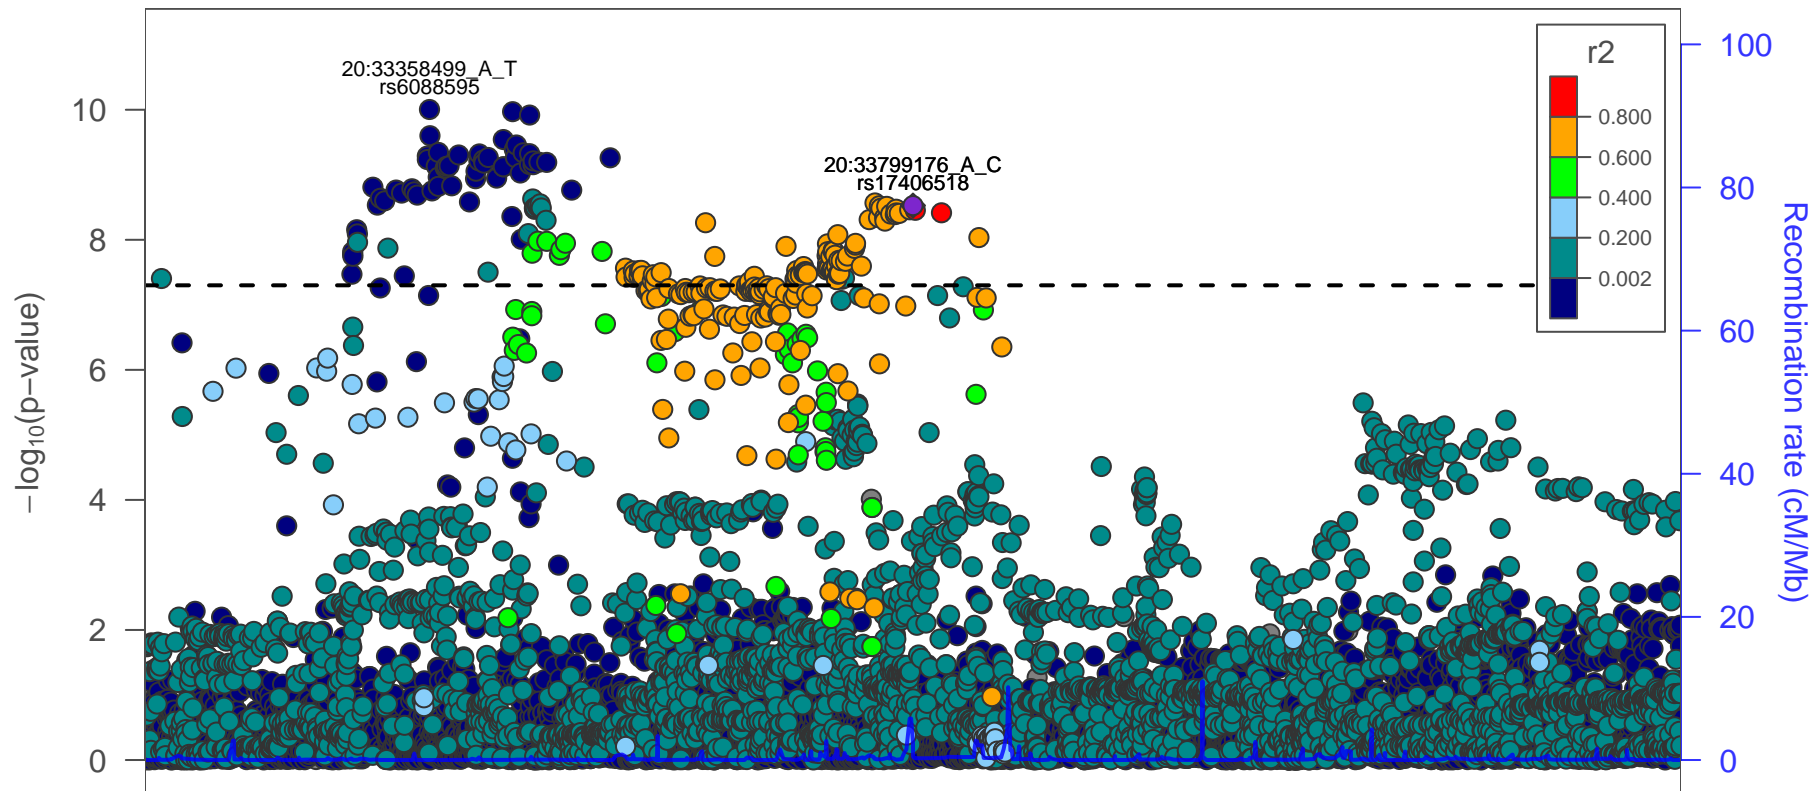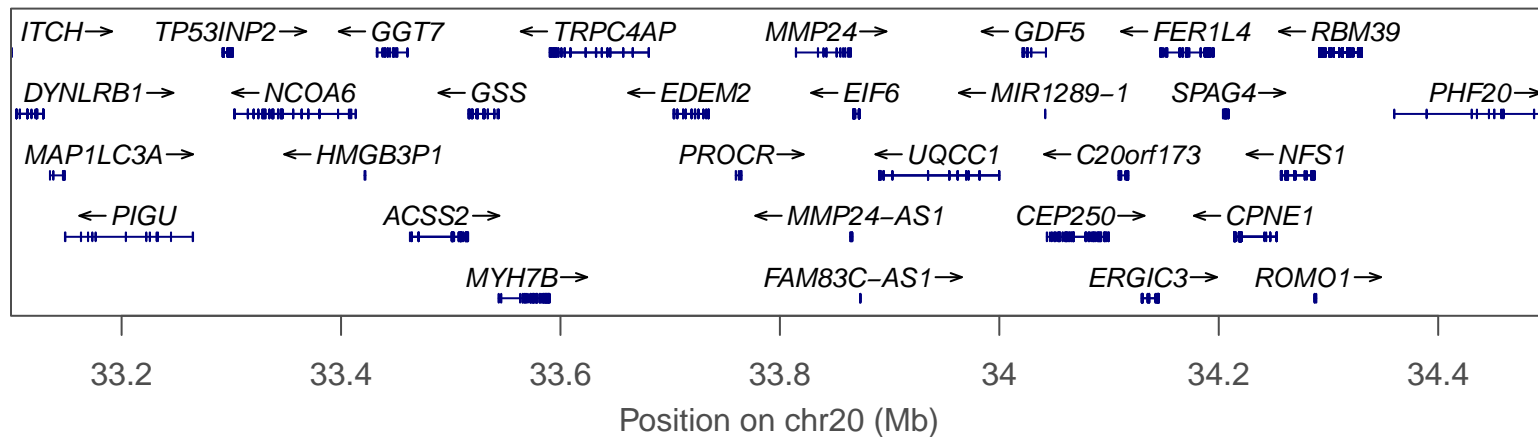

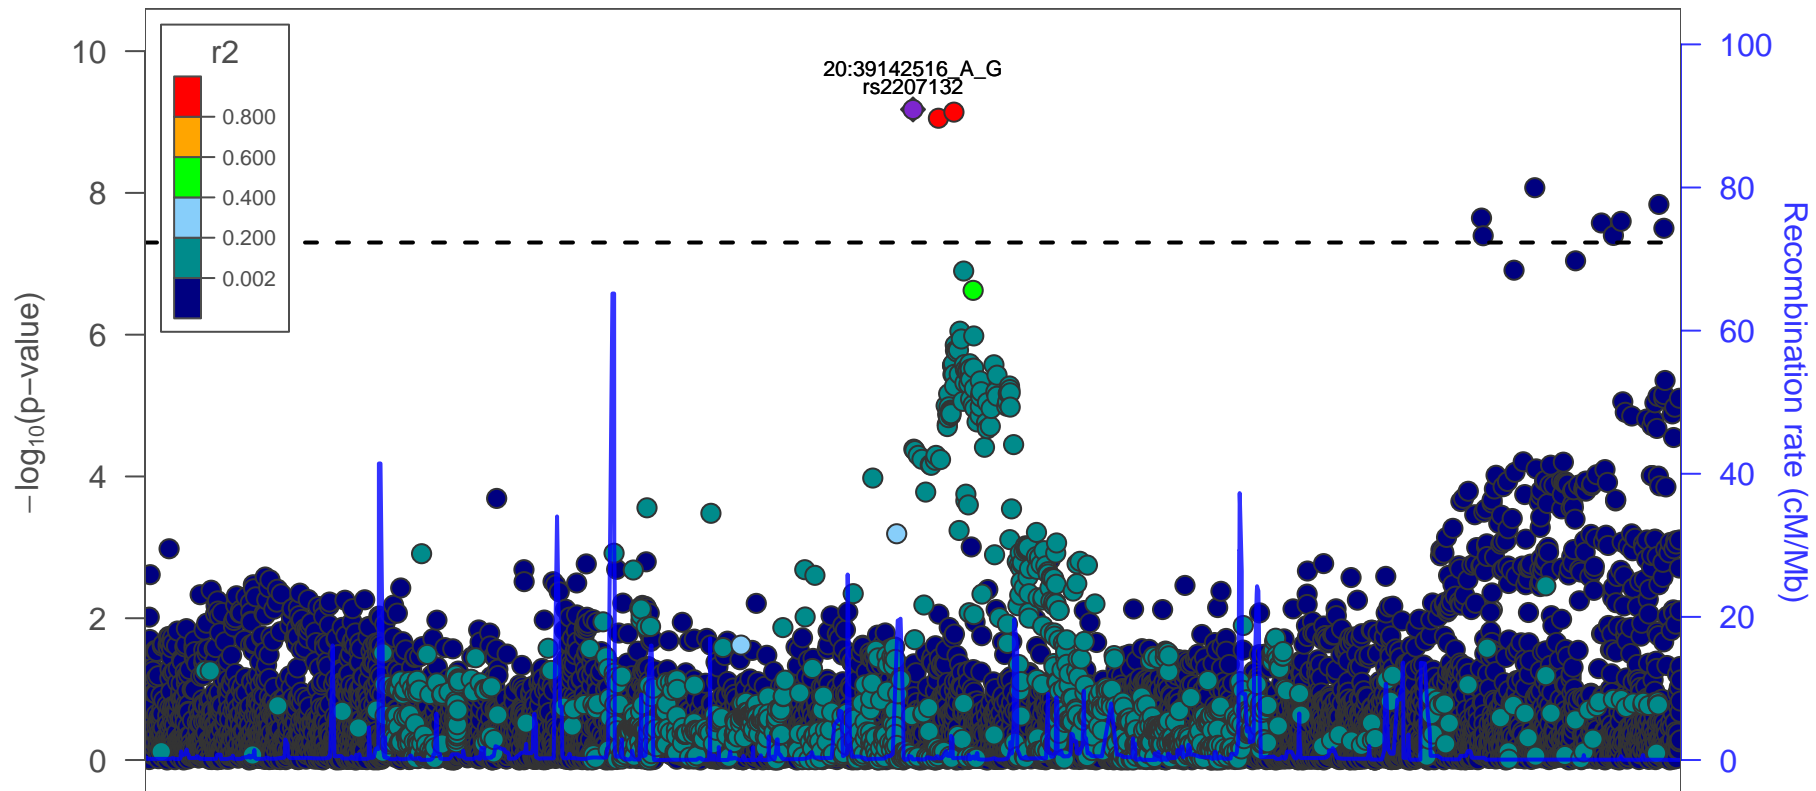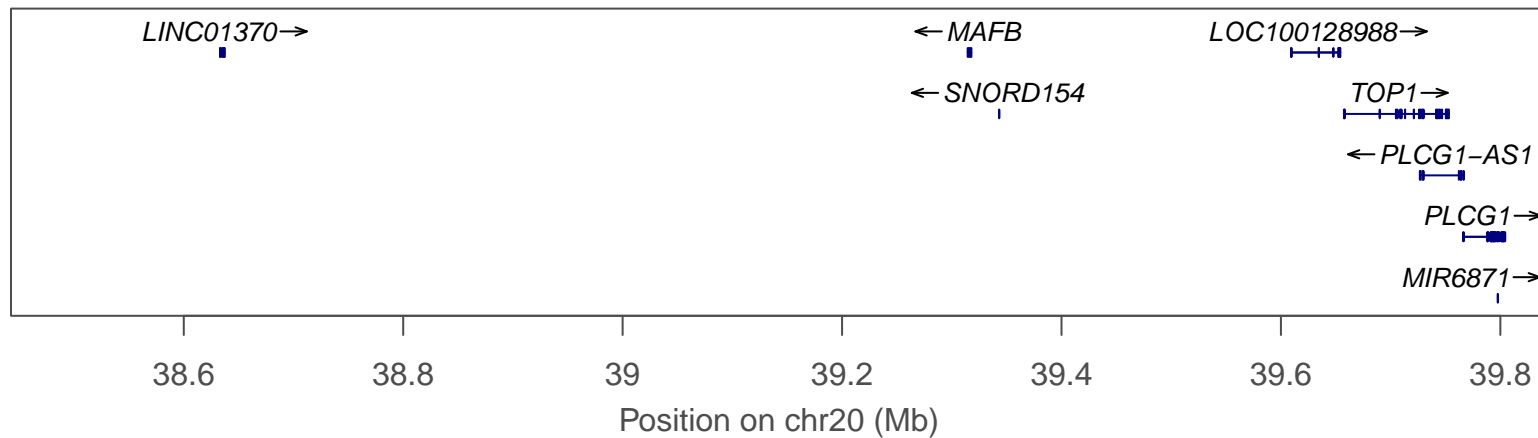

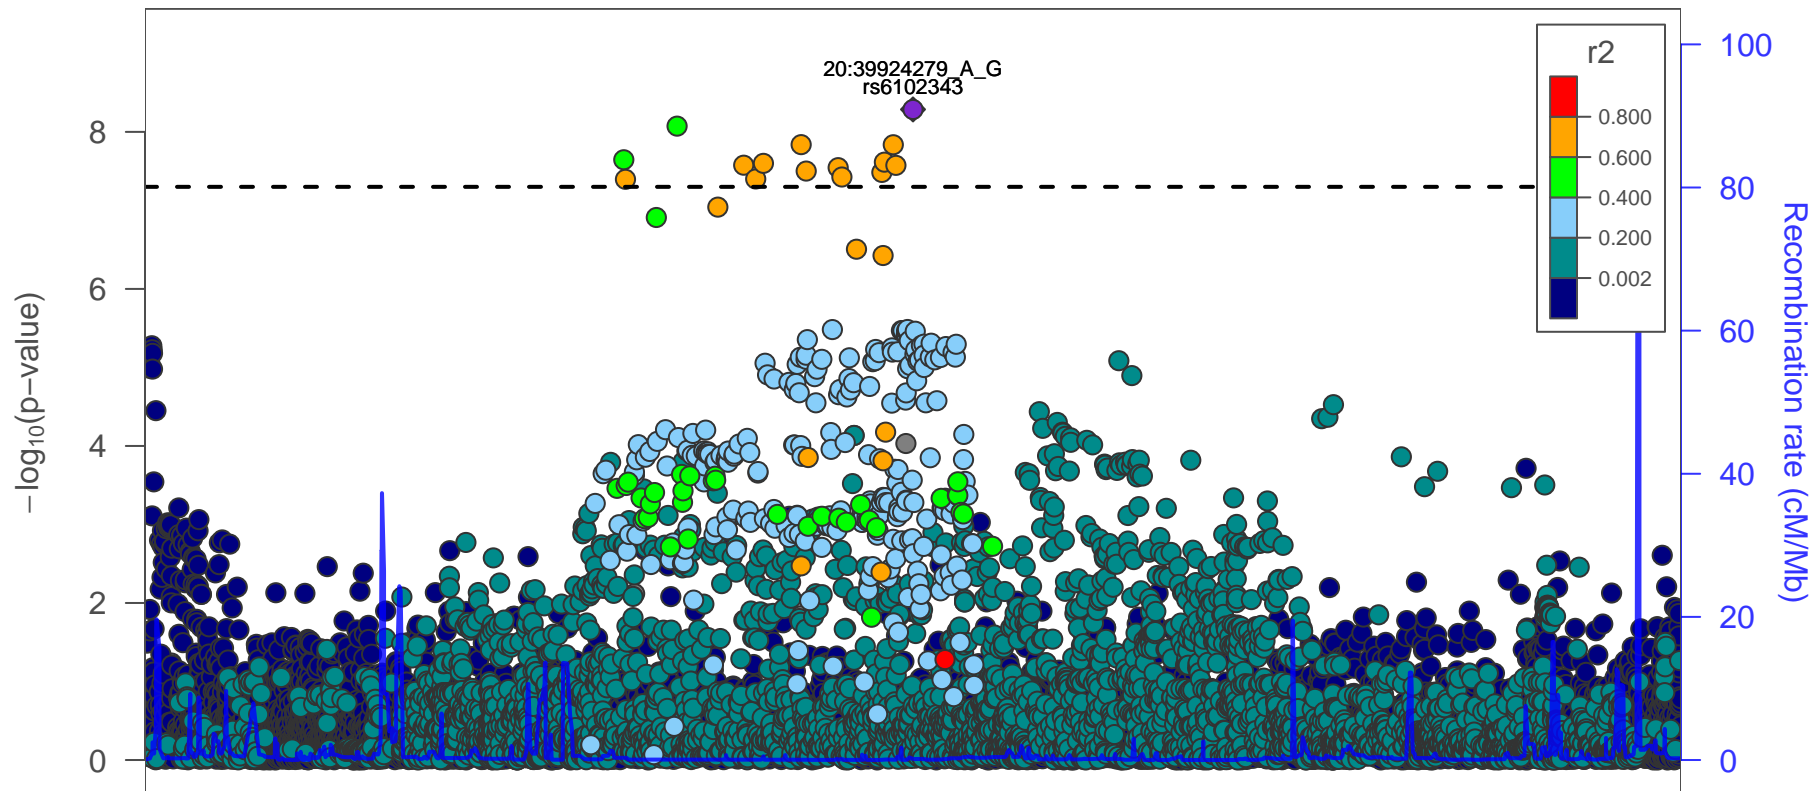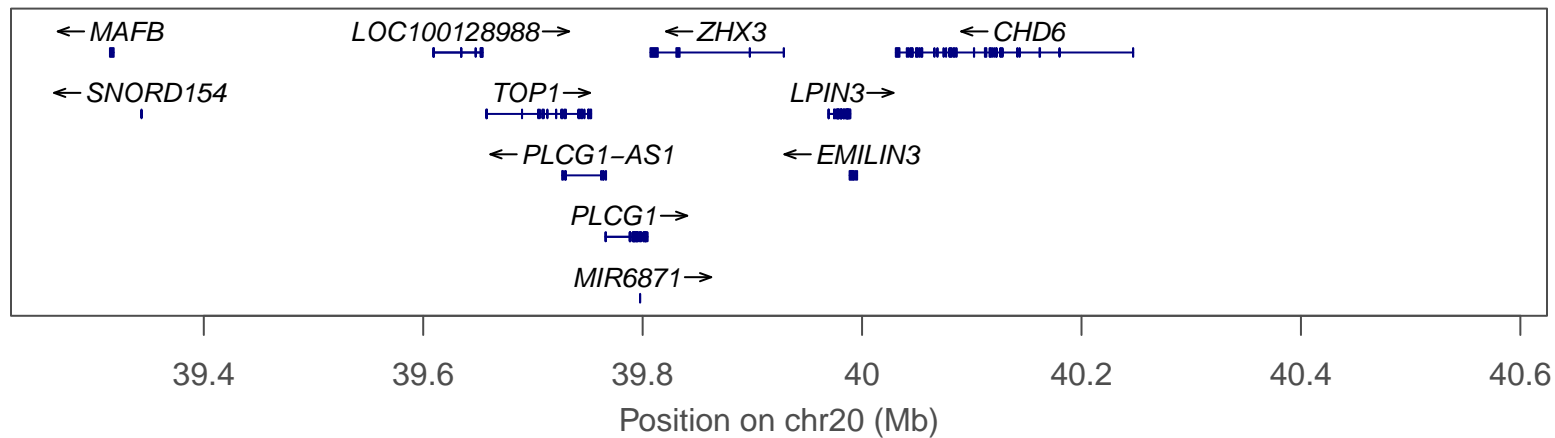

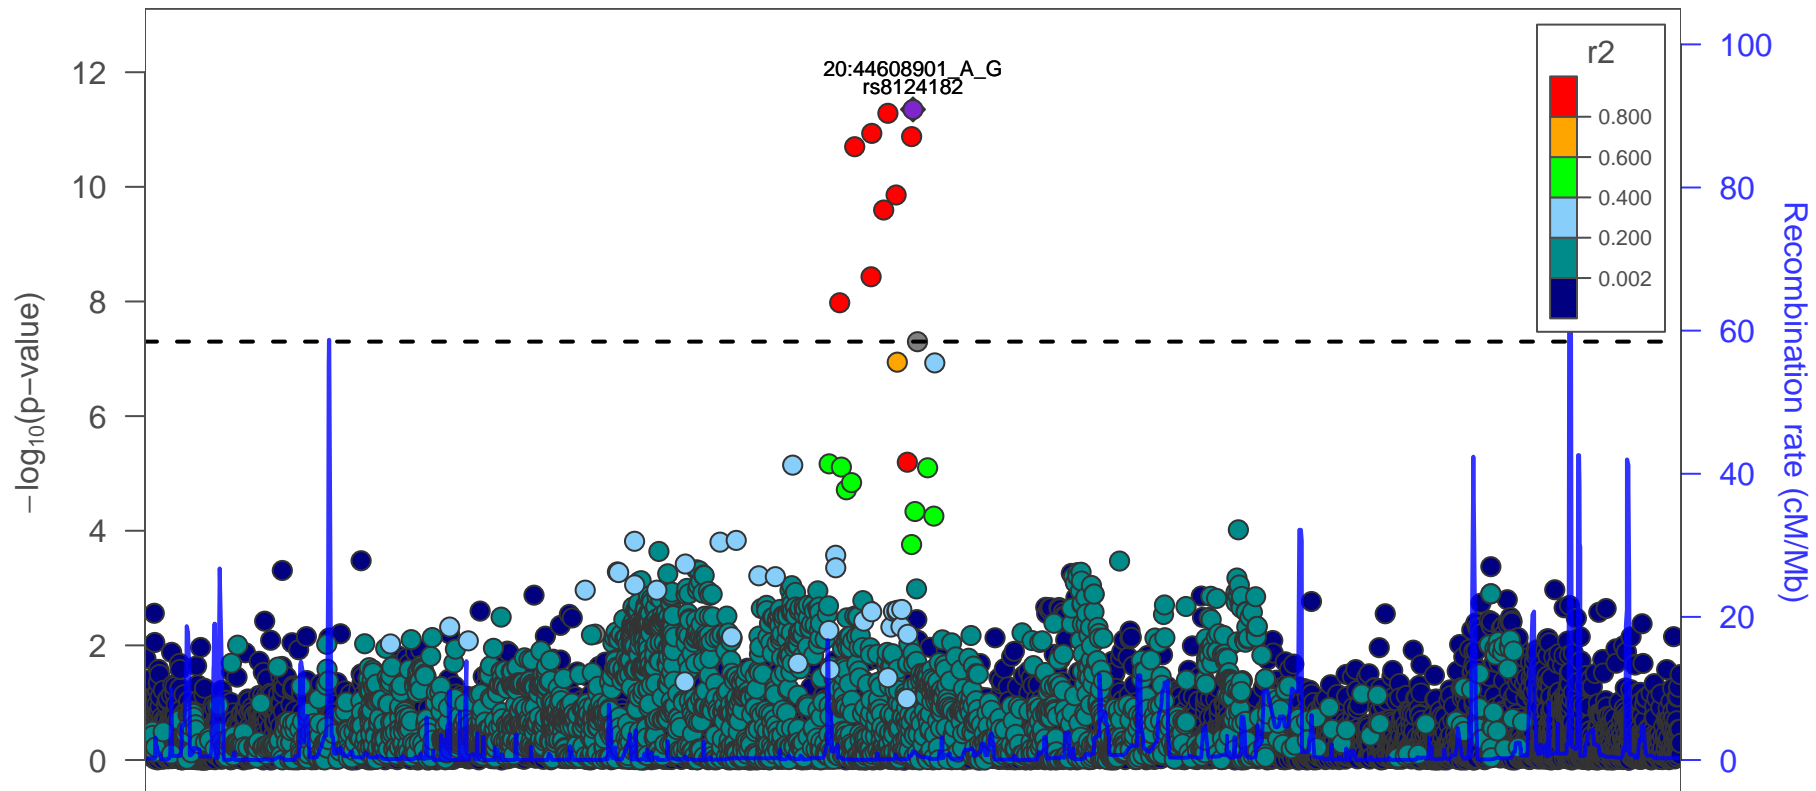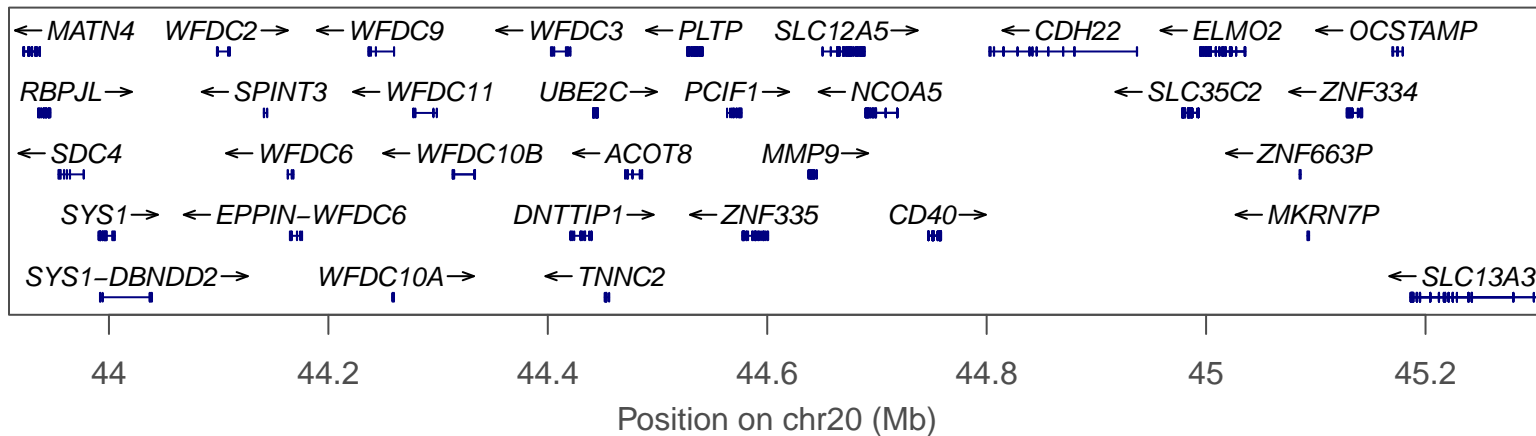



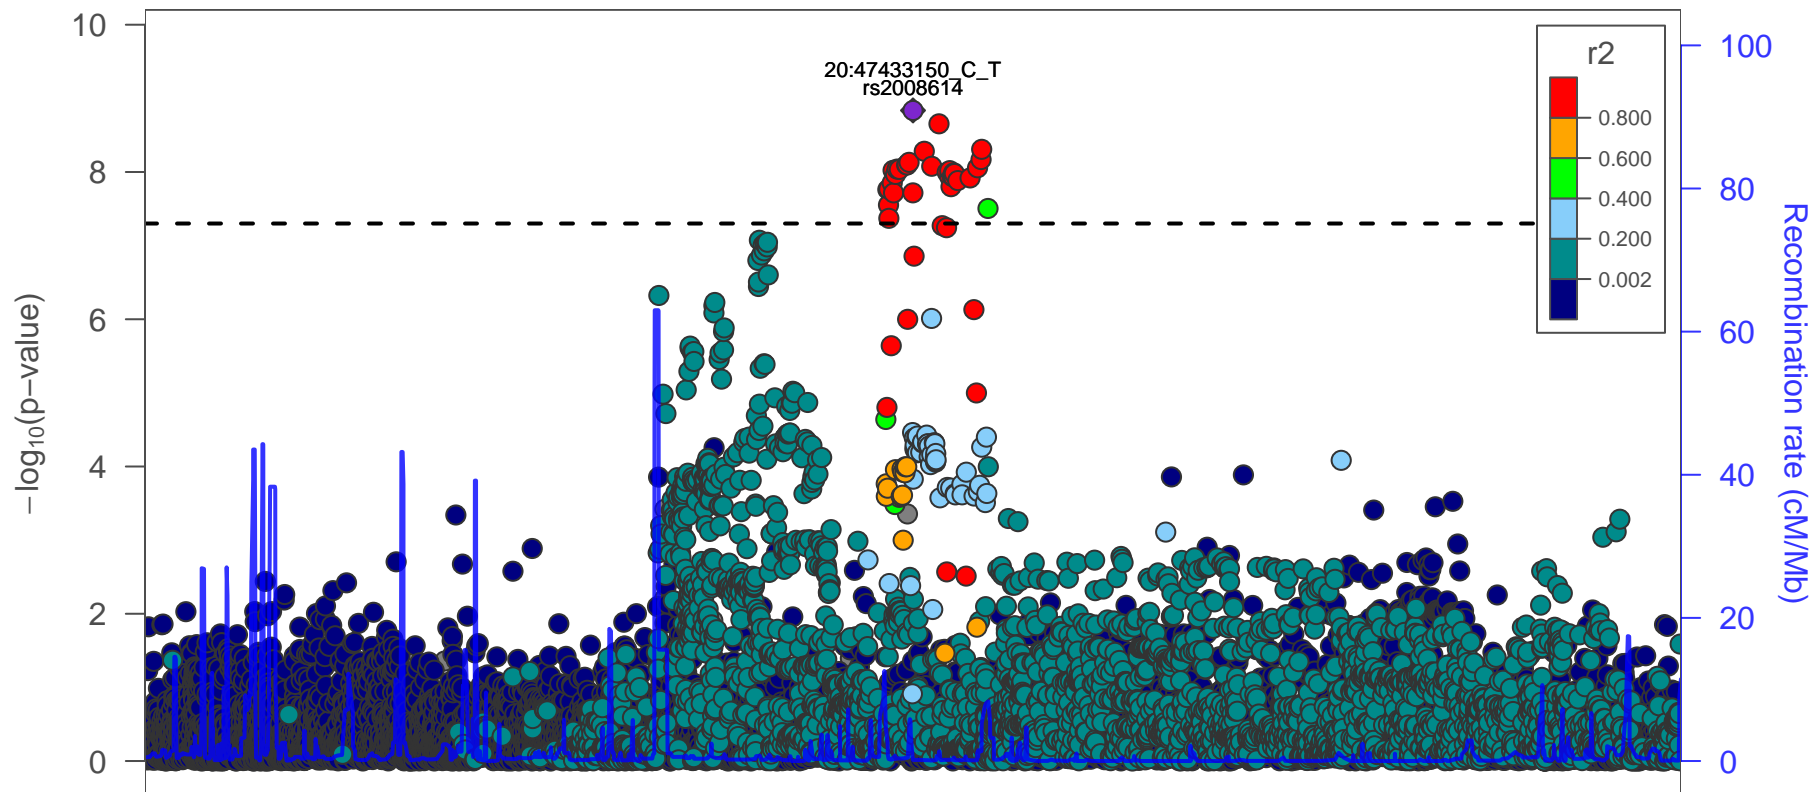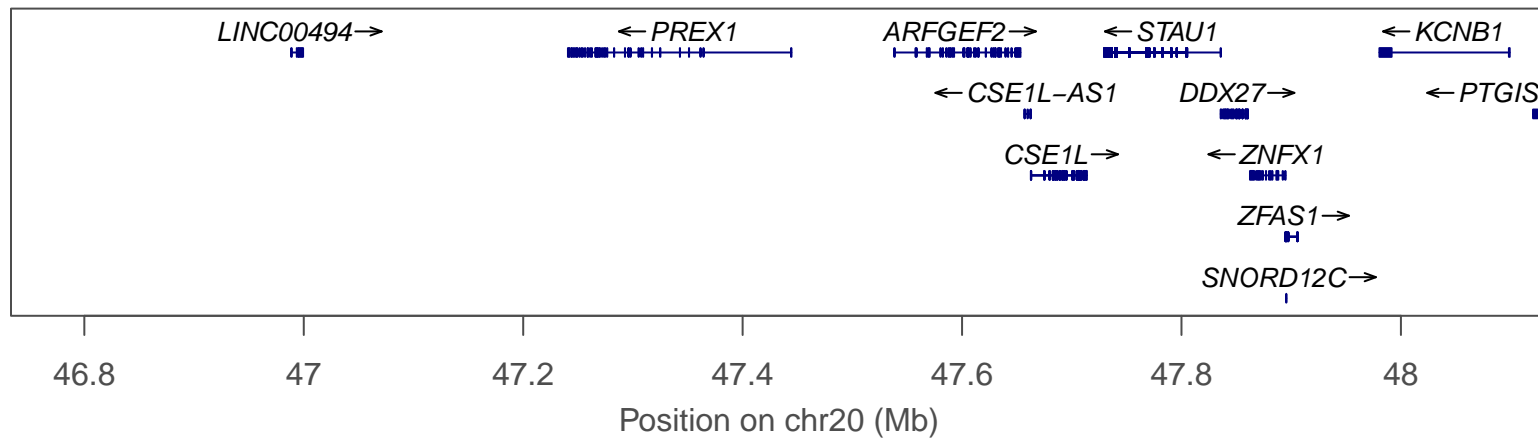

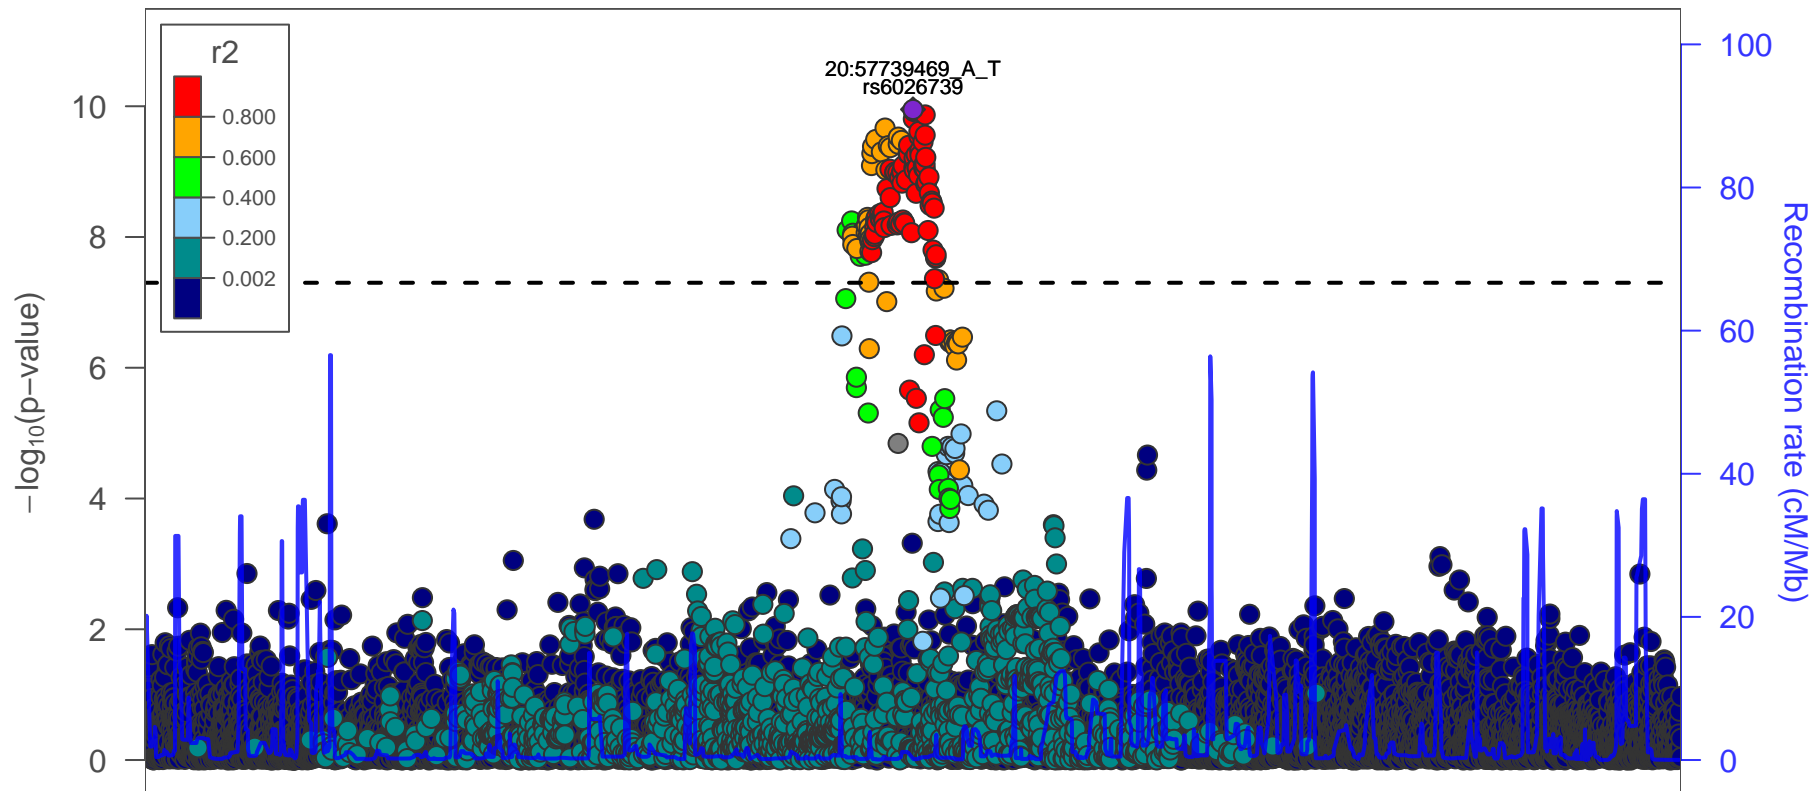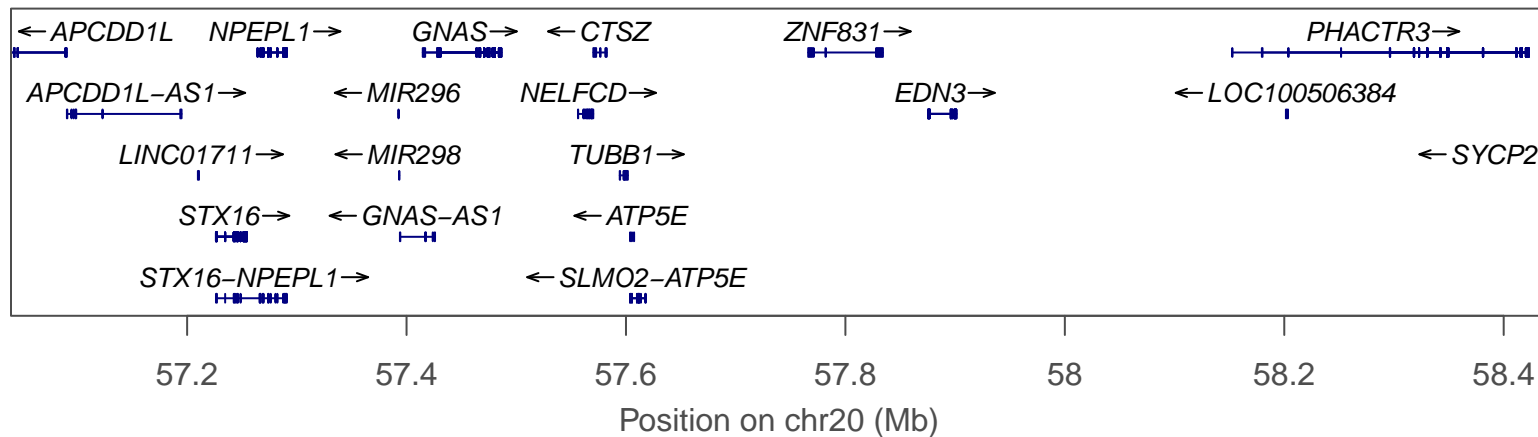

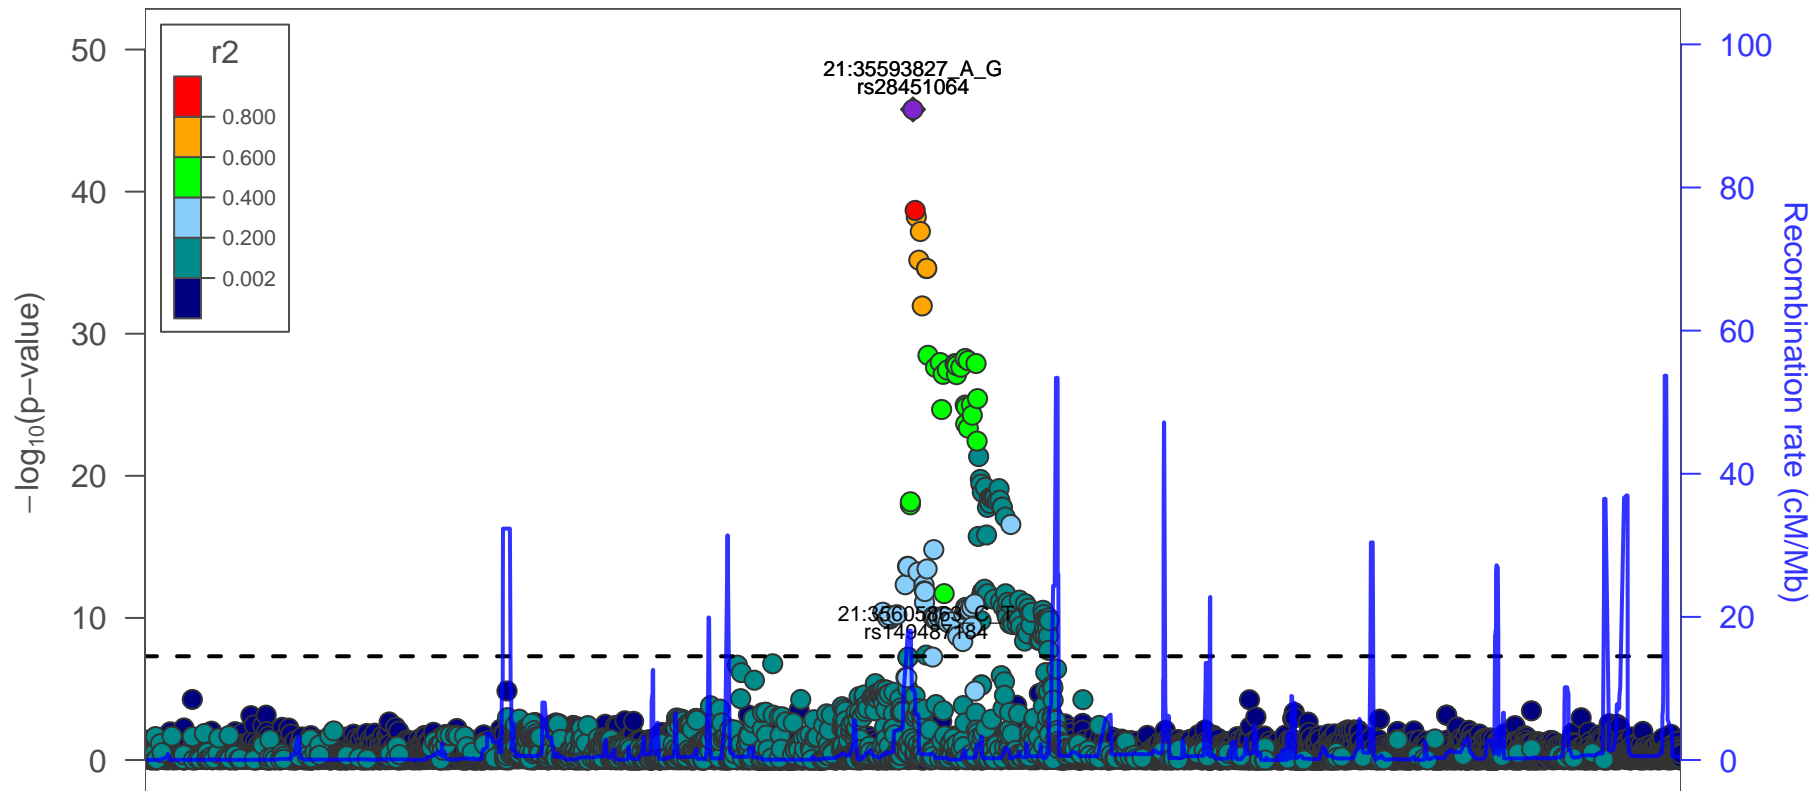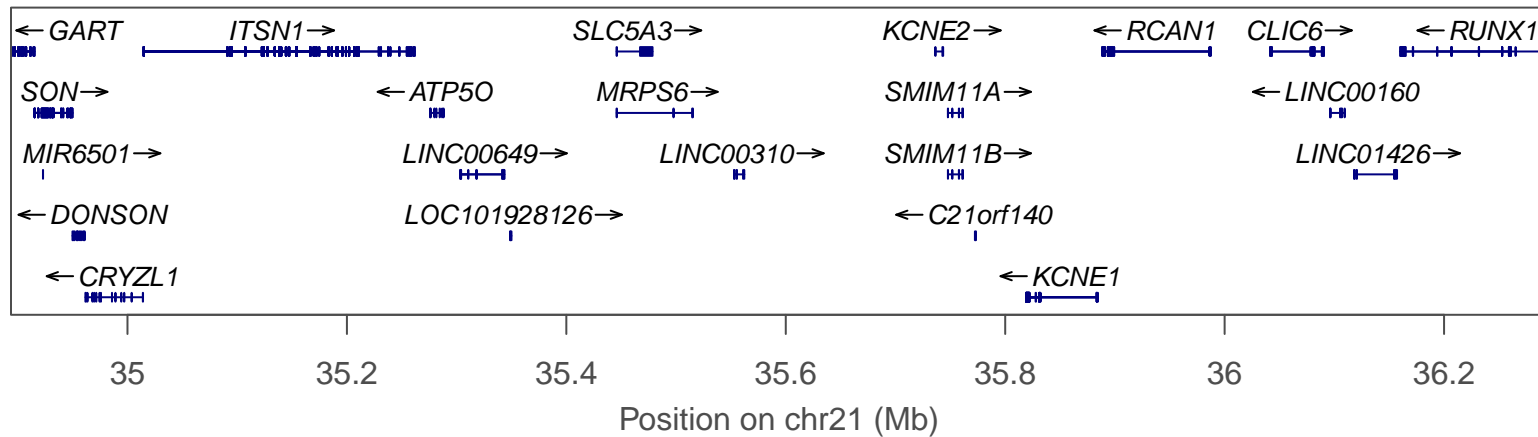

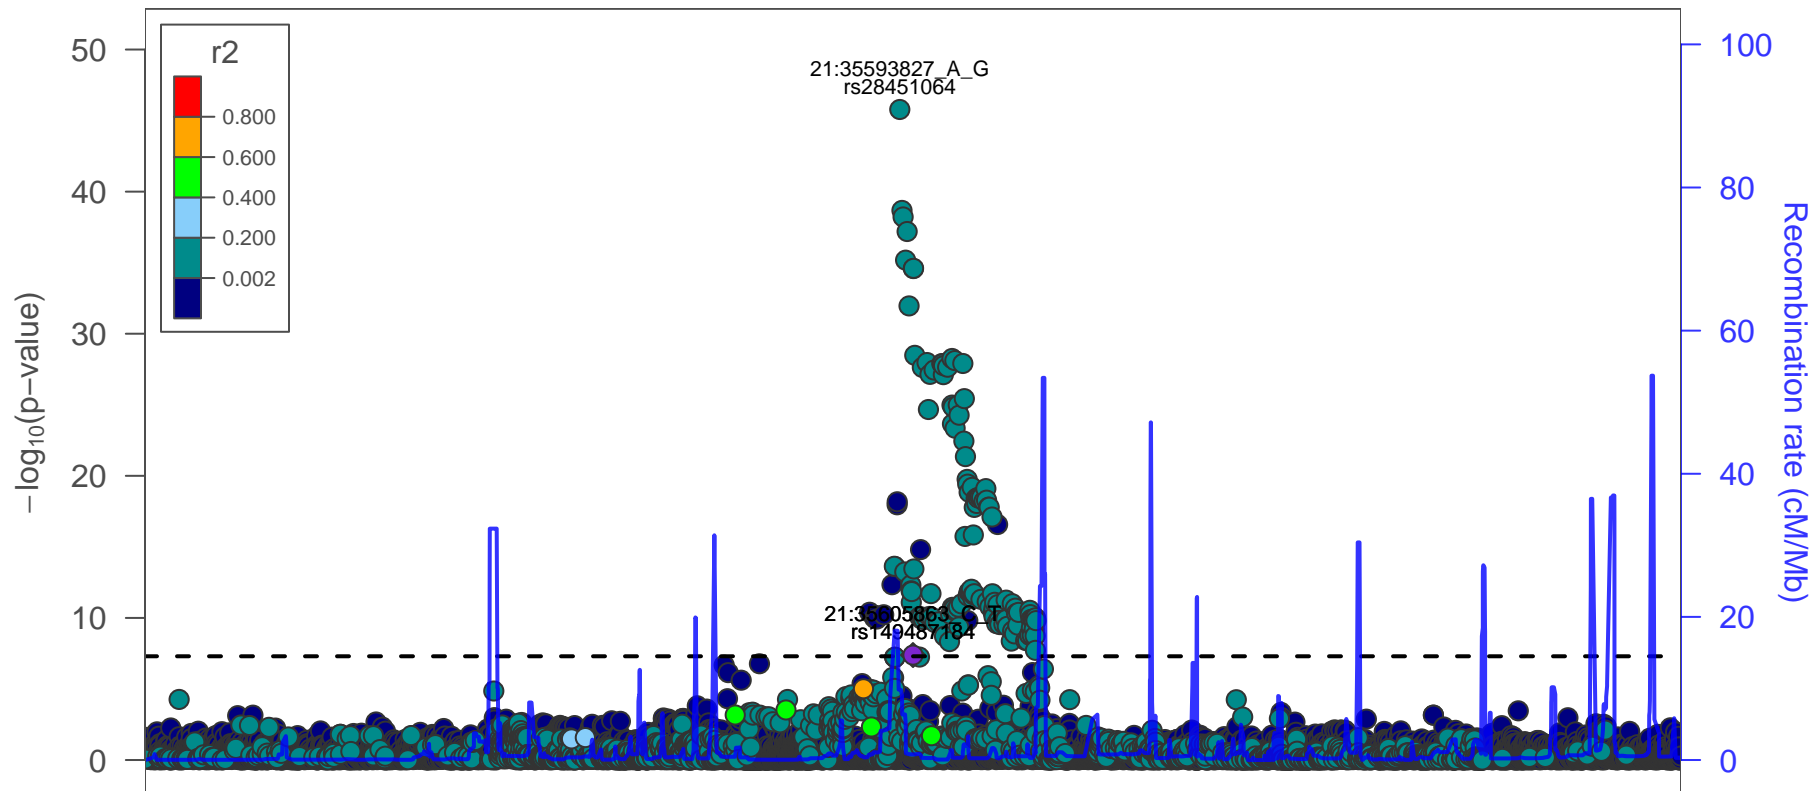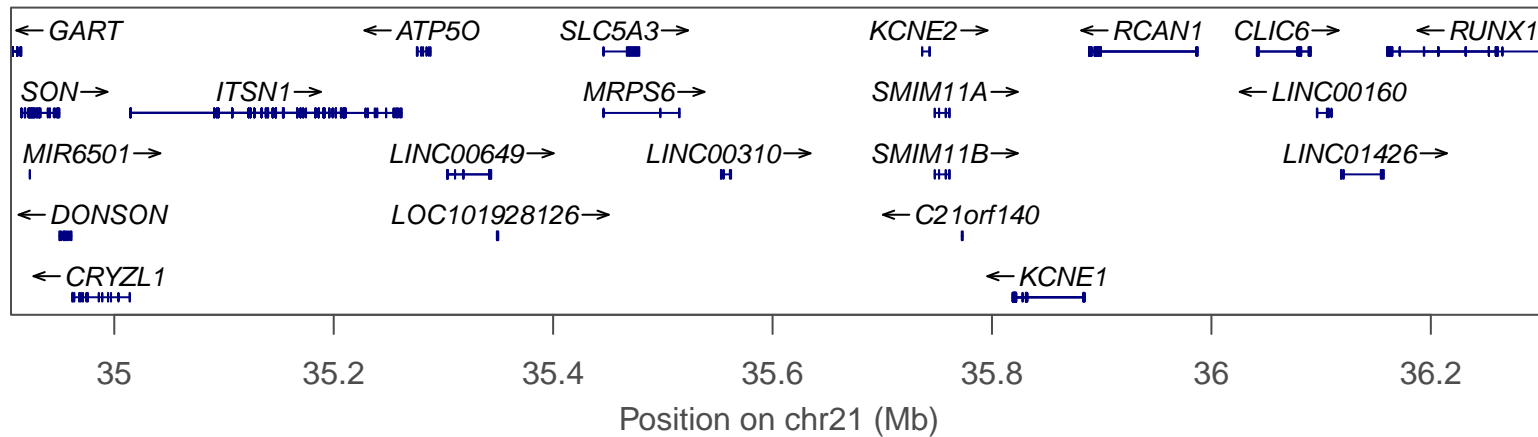

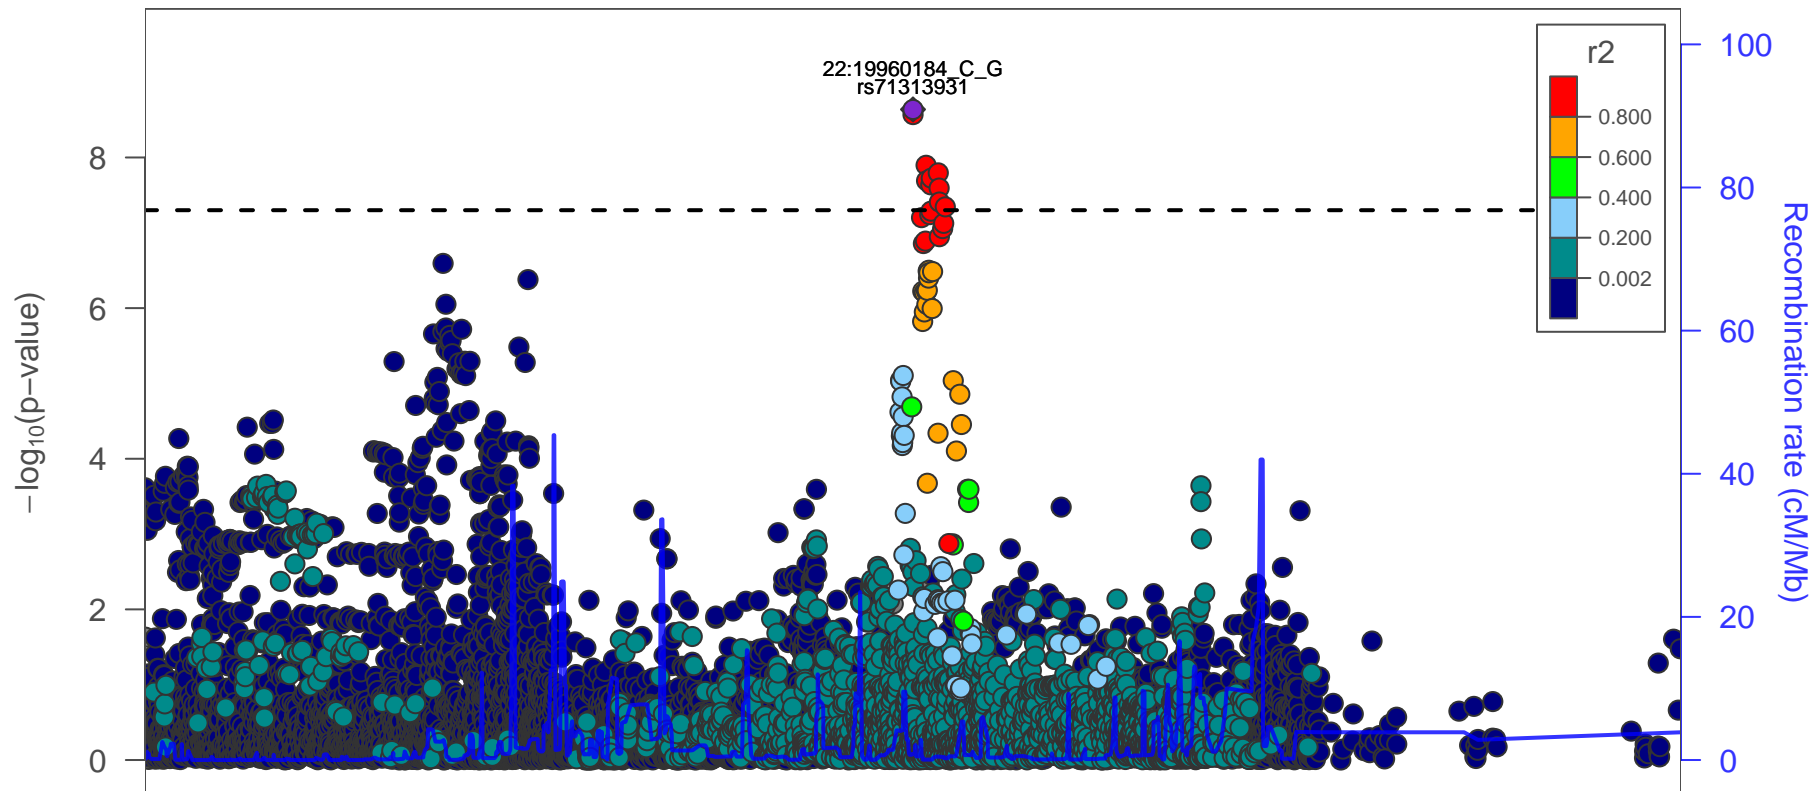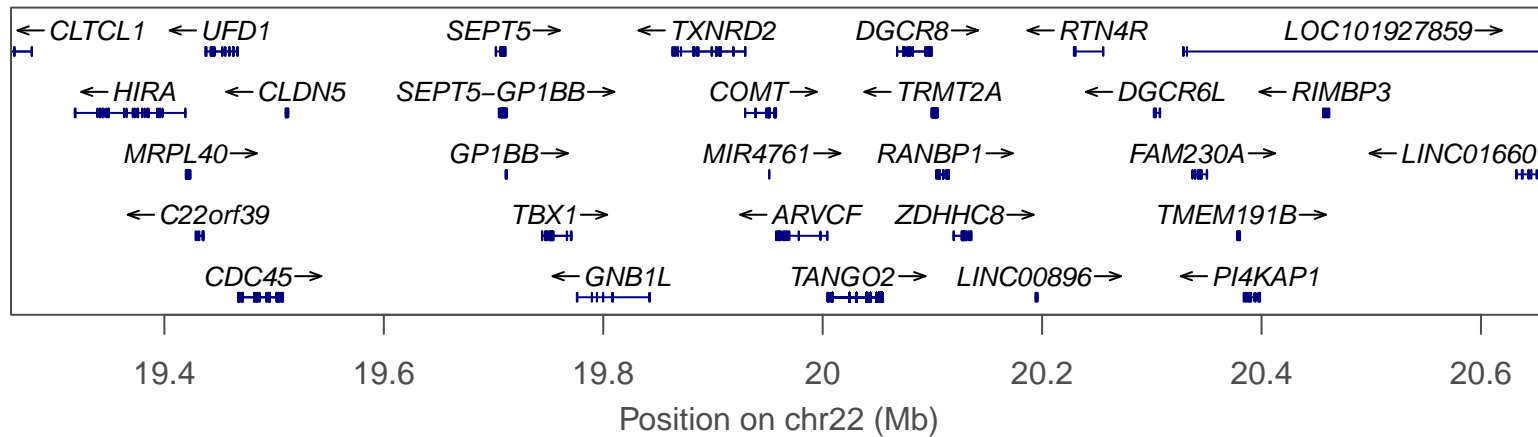

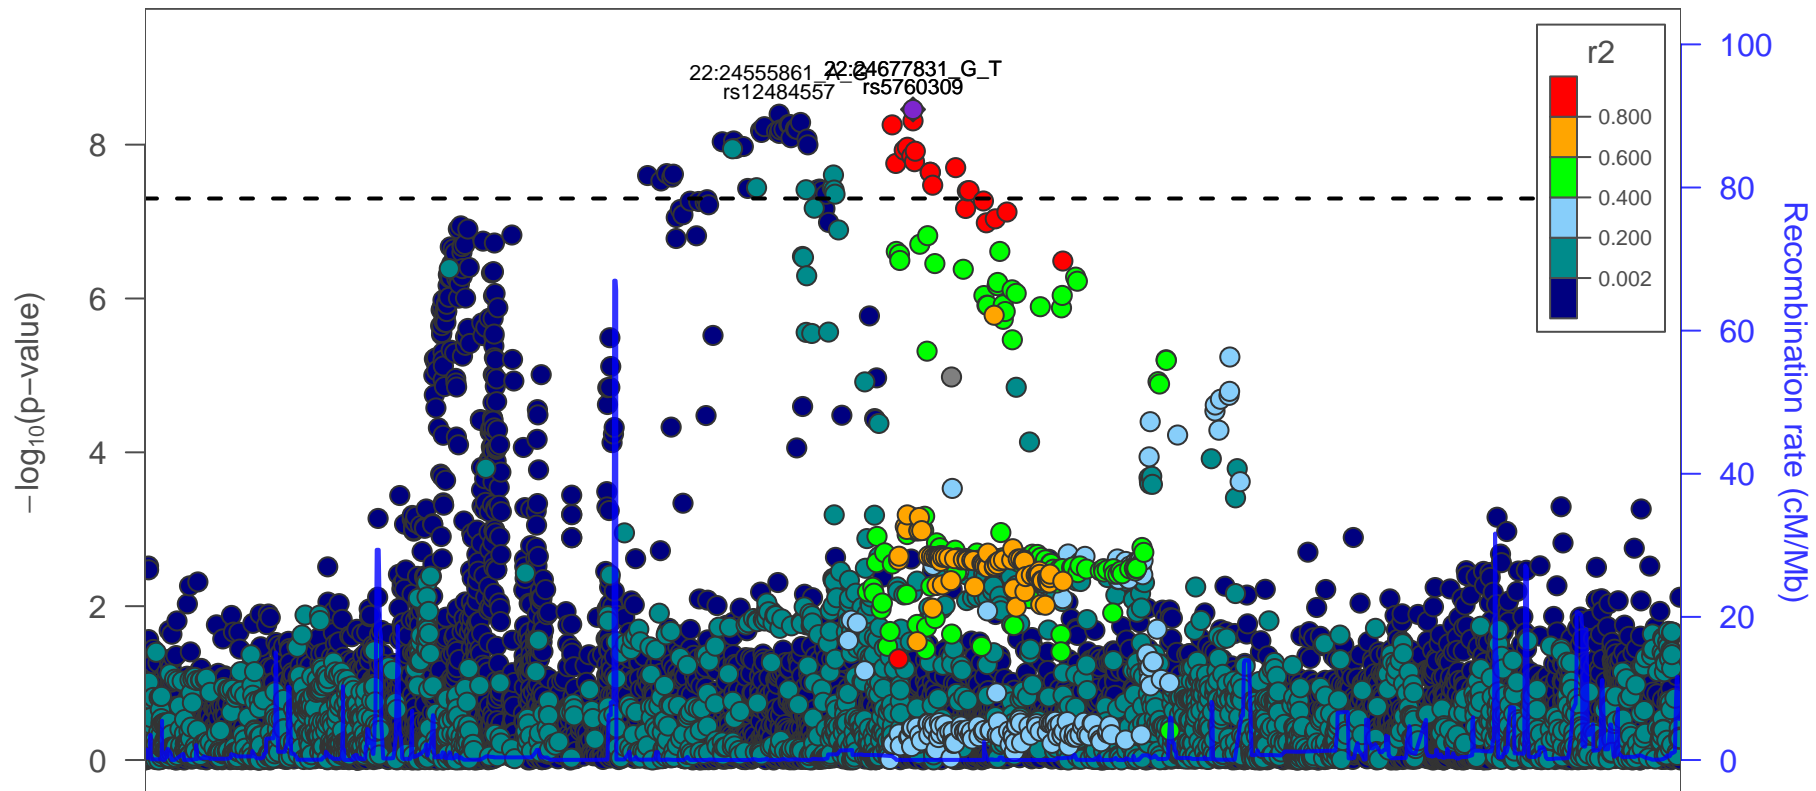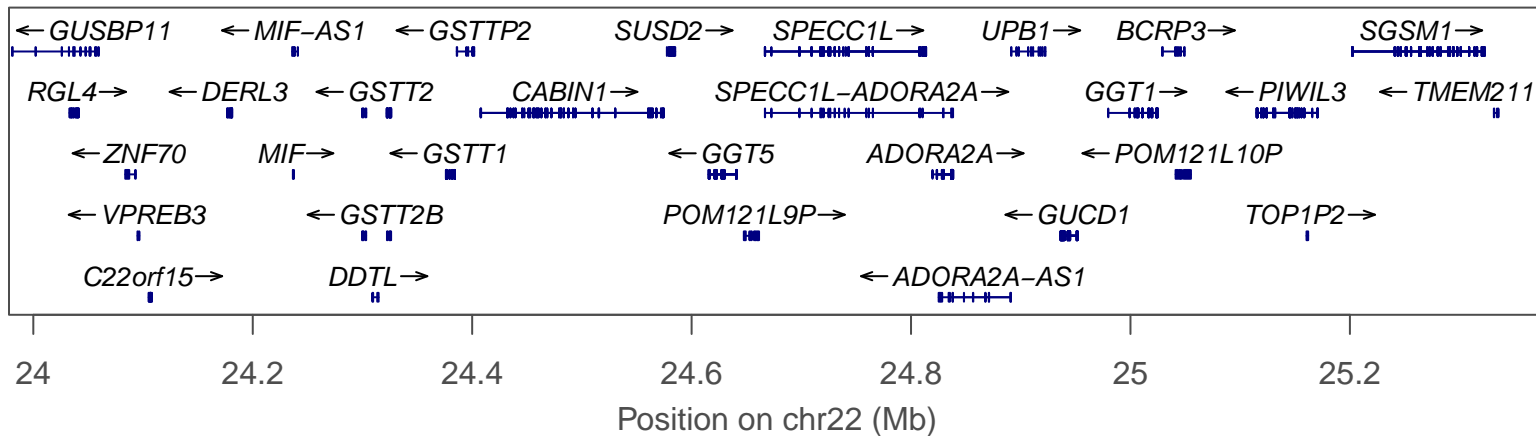

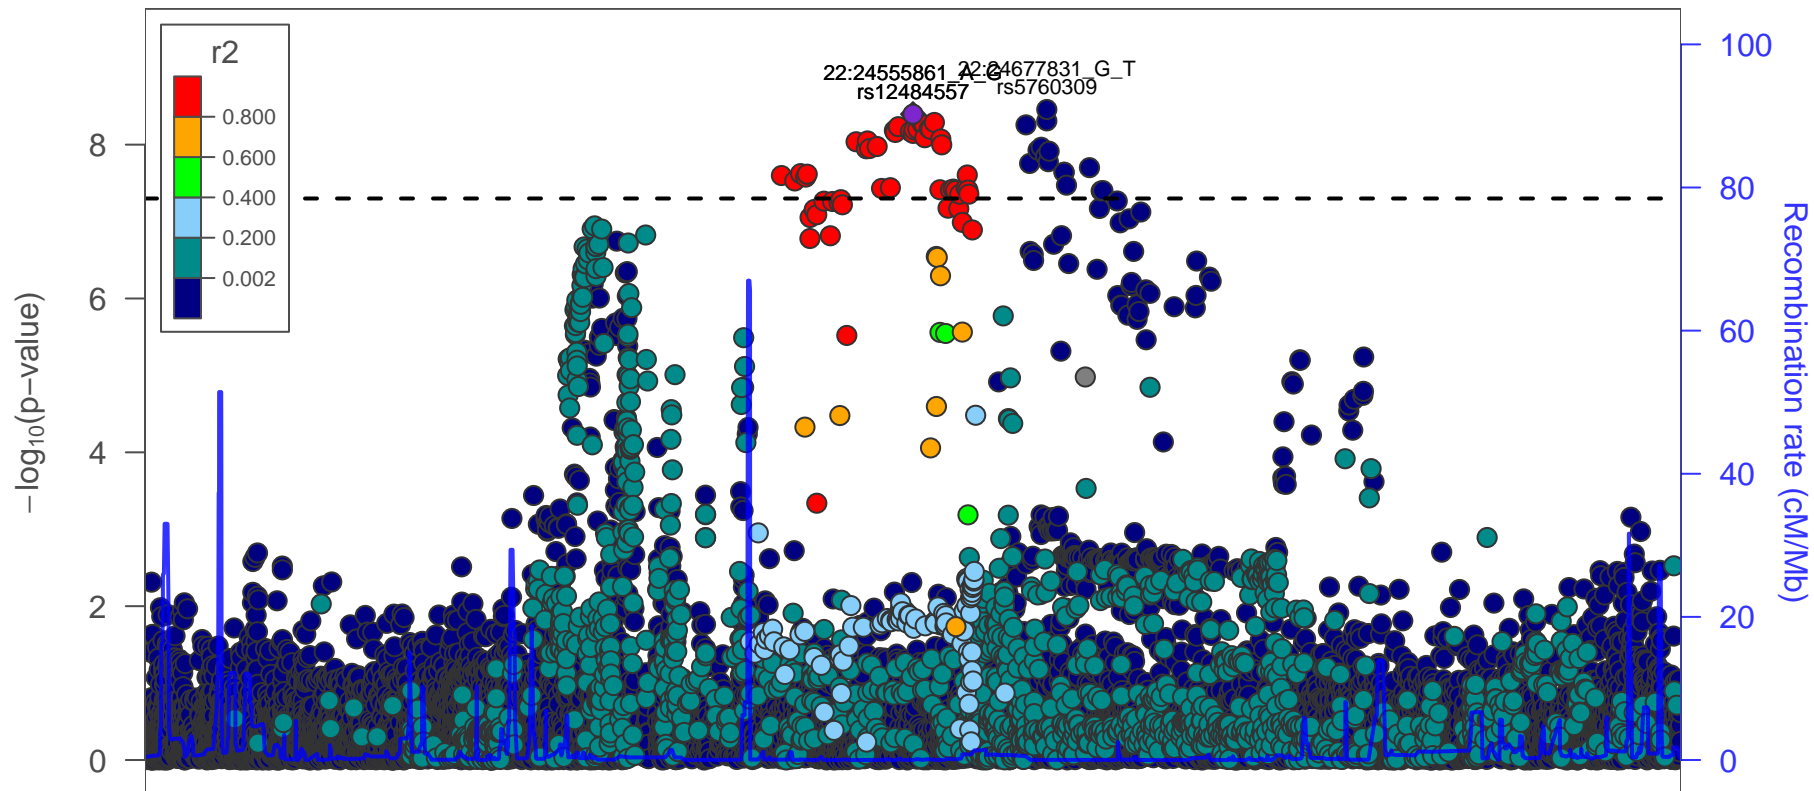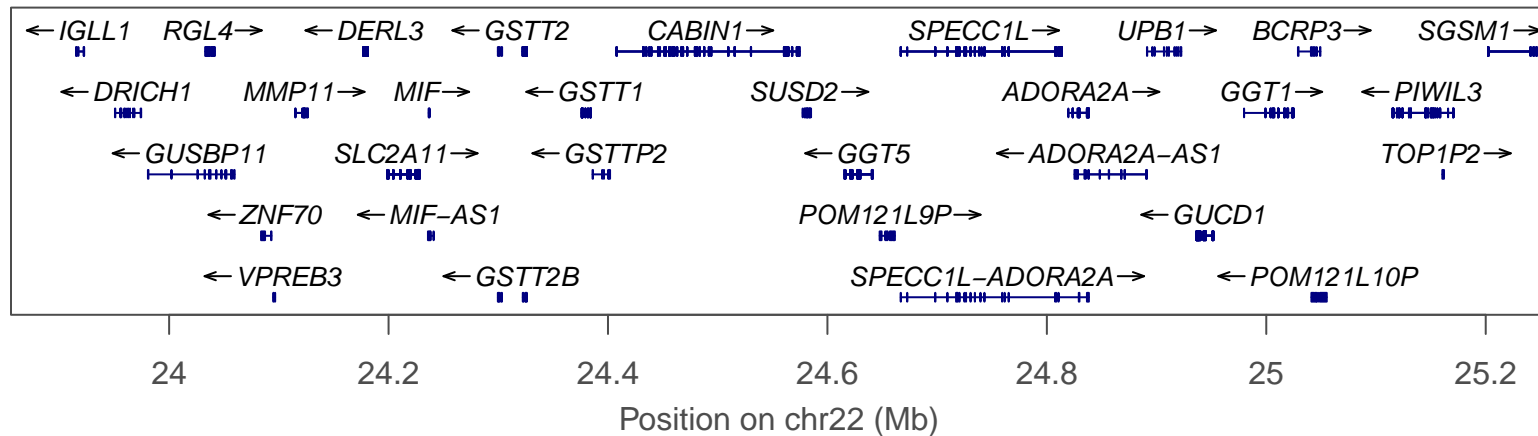

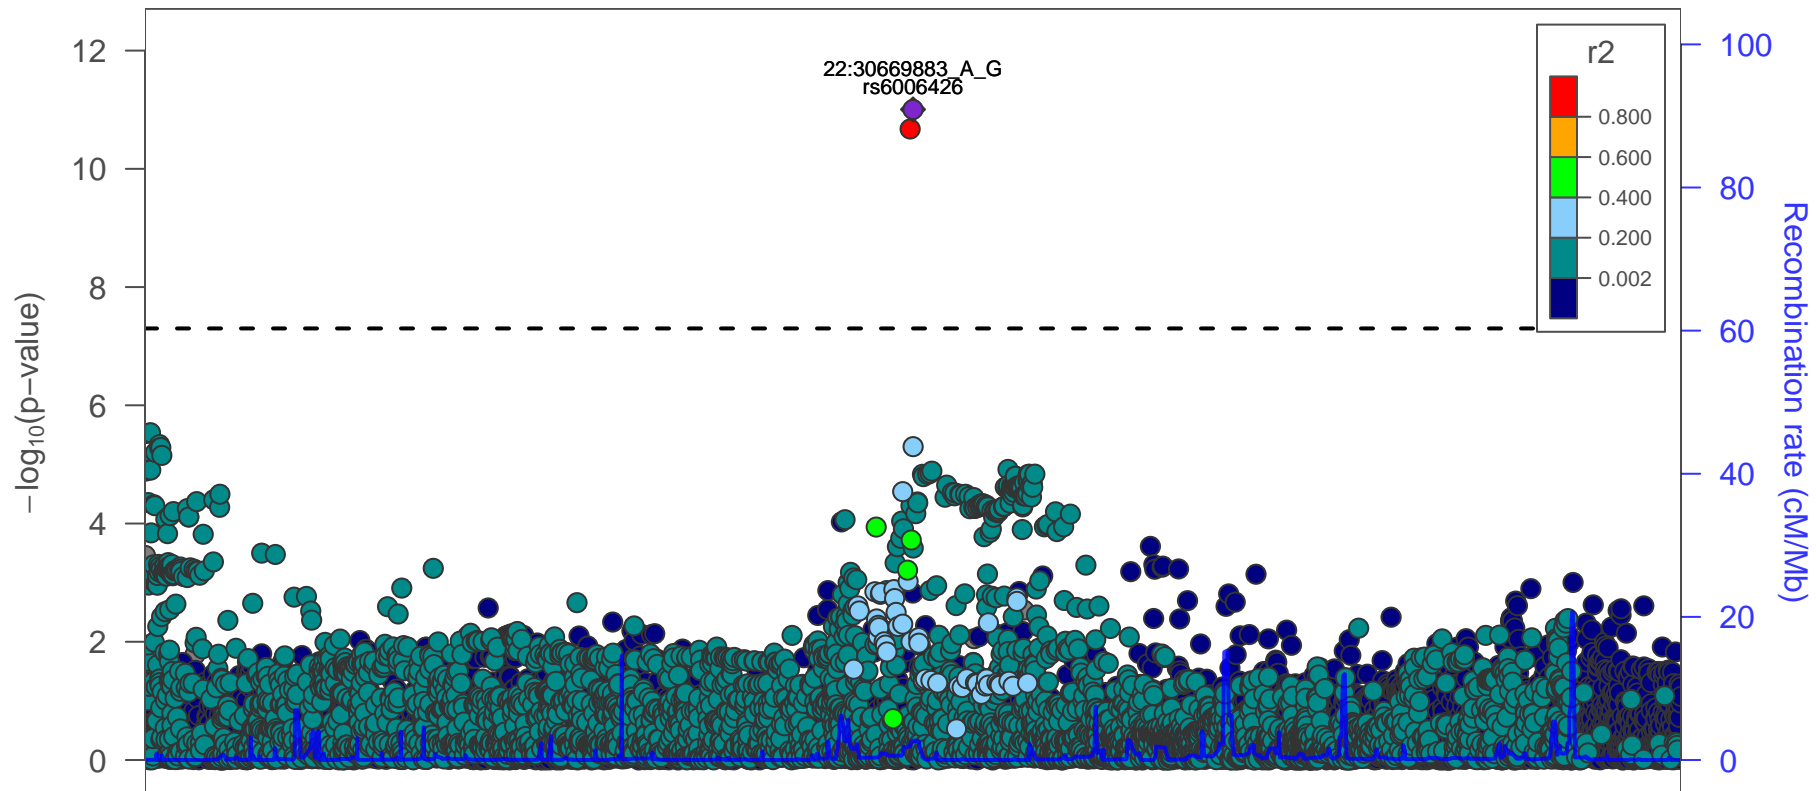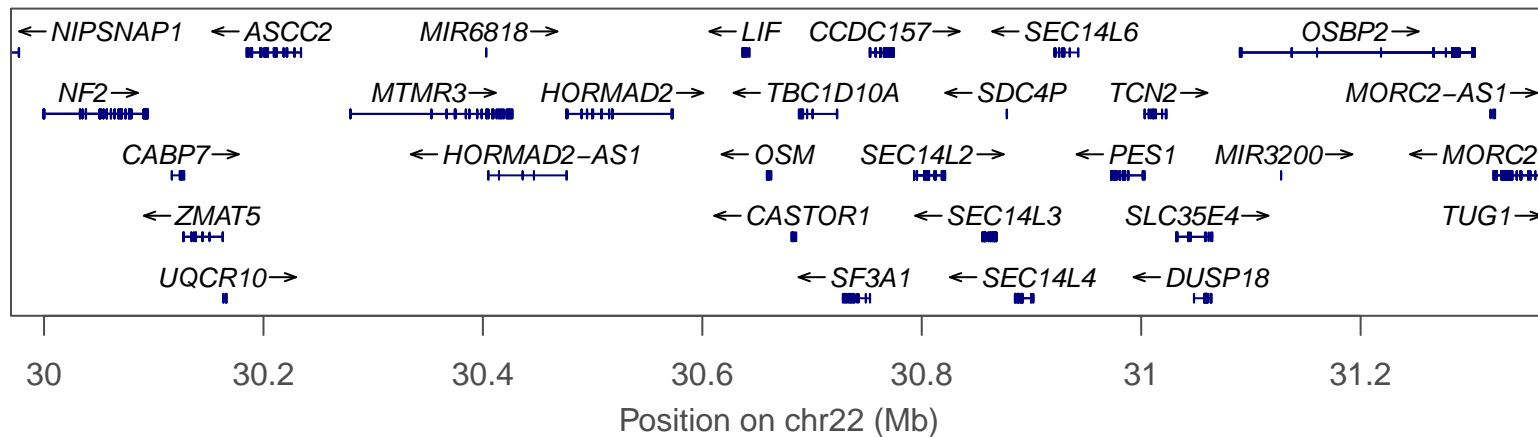



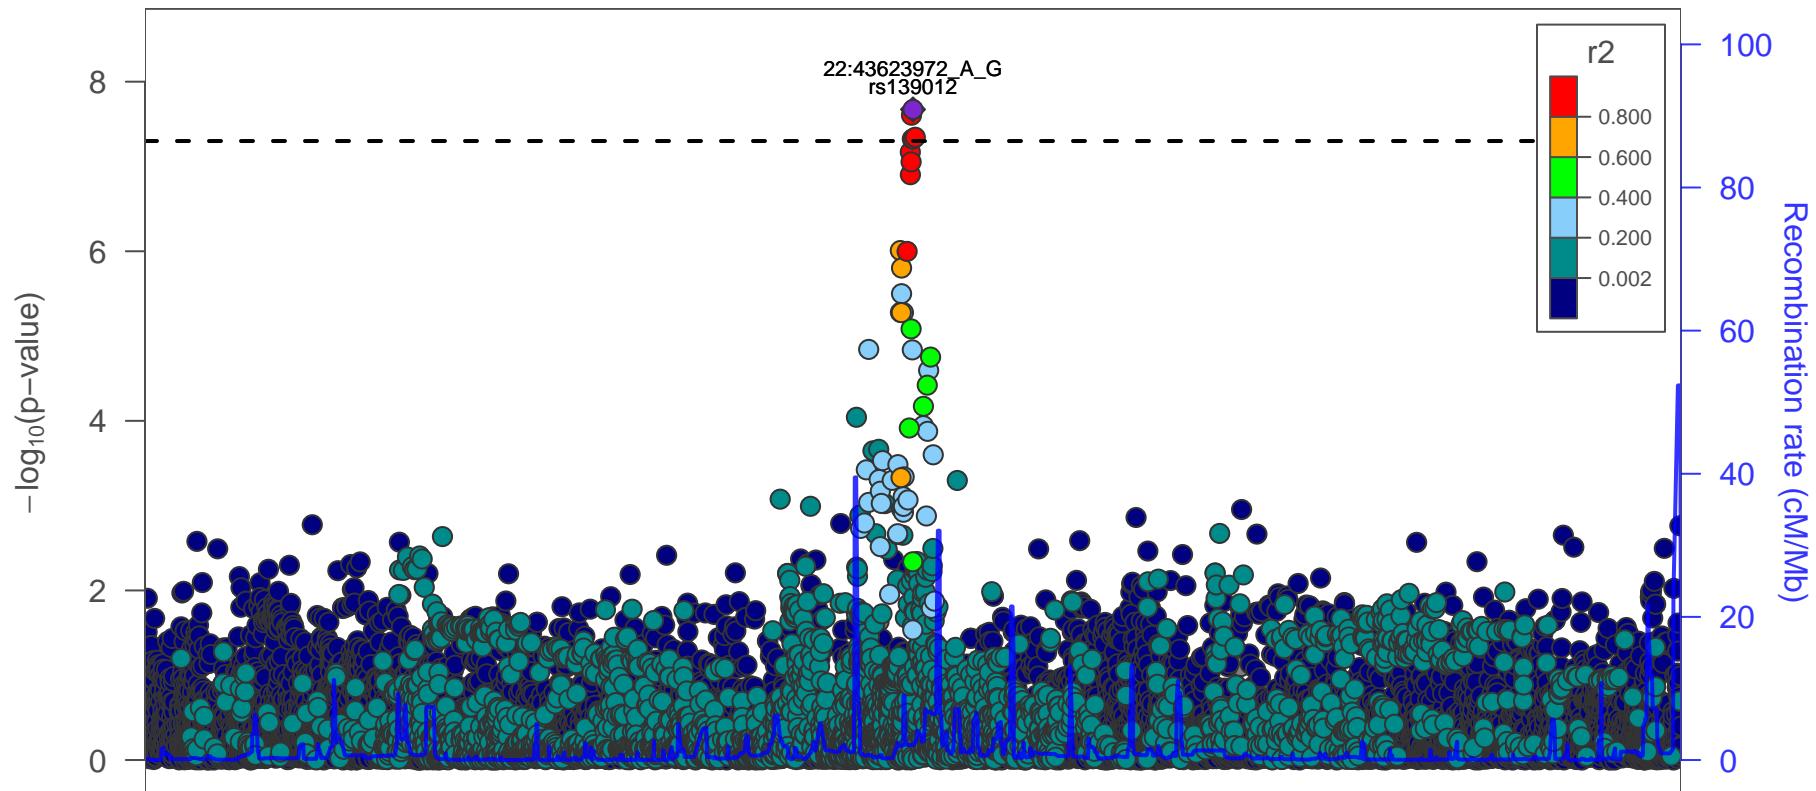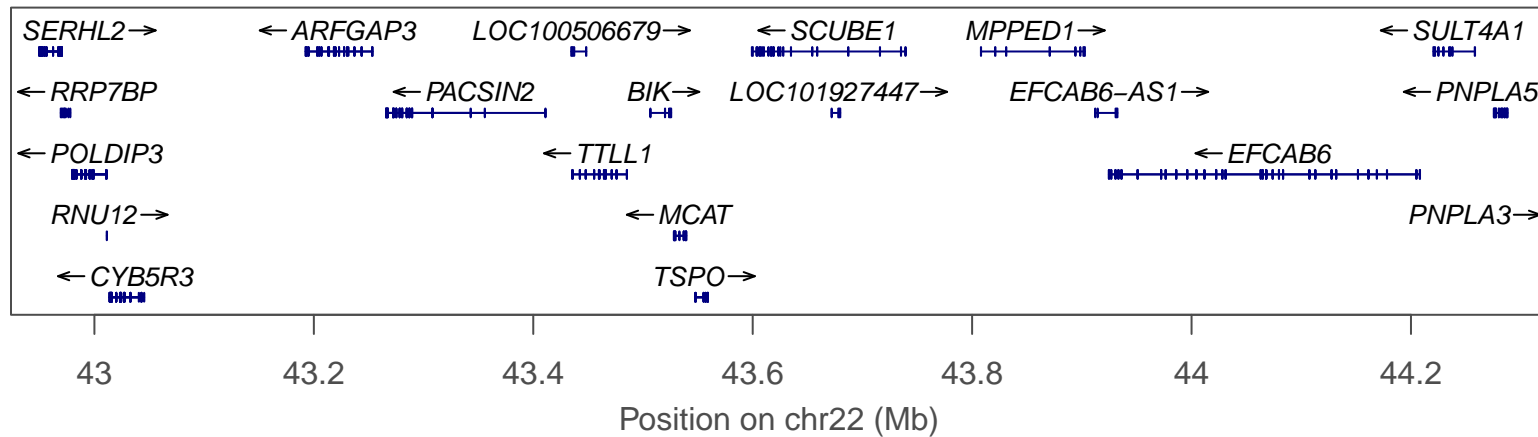

Supplement: 41588_2022_1233_MOESM3_ESM.pdf [file 41588_2022_1233_MOESM3_ESM.pdf]
